# Supplementary material for: Iron(iii)-catalyzed selective N–O bond cleavage to prepare tetrasubstituted pyridines and 3,5-disubstituted isoxazolines from N-vinyl-α,β-unsaturated ketonitrones
Source: Royal Society of Chemistry journal article supplement (doi:10.1039/c8gc00630j), 2018-01-01

## Supporting Information

### Iron(III)-Catalyzed Selective N–O Bond Cleavage to Prepare Tetrasubstituted Pyridines and 3,5-Disubstituted Isoxazoles from N-Vinyl- $\alpha,\beta$ -Unsaturated Ketonitrone

Chun-Hua Chen, Qing-Yan Wu, Cui Wei, Cui Liang, Gui-Fa Su\*, and Dong-Liang Mo\*

*State Key Laboratory for Chemistry and Molecular Engineering of Medicinal Resources, Ministry of Science and Technology of China; School of Chemistry and Pharmaceutical Sciences, Guangxi Normal University, 15 Yu Cai Road, Guilin 541004, China.*

#### Contents

|     |                                                                                                                     |     |
|-----|---------------------------------------------------------------------------------------------------------------------|-----|
| 1.  | General Experimental Information                                                                                    | S2  |
| 2   | Optimization tables for the formation of <b>2a</b> and <b>3a</b>                                                    | S2  |
| 3.  | Synthesis of tetrasubstituted pyridines <b>2</b>                                                                    | S4  |
| 4.  | Synthesis of 3,5-disubstituted isoxazoles <b>3</b>                                                                  | S17 |
| 5.  | Synthesis of N-vinyl nitron <b>1</b>                                                                                | S25 |
| 6.  | Synthesis of isoxazole <b>4</b>                                                                                     | S32 |
| 7.  | Synthesis of ligand <b>L5</b> and <b>L6</b>                                                                         | S33 |
| 8.  | Synthesis of epoxypyridine <b>5</b>                                                                                 | S35 |
| 9.  | References                                                                                                          | S36 |
| 10. | X-ray structure of compounds <b>2n</b> and <b>3m</b>                                                                | S37 |
| 11. | NMR spectra of <b>2</b> , <b>3</b> , <b>1</b> , <b>4</b> , <b>L5</b> , <b>L6</b> , <b>5</b> , and HPLC for <b>5</b> | S38 |

## 1. General Experimental Information

$^1\text{H}$  NMR and  $^{13}\text{C}$  NMR spectra were recorded at ambient temperature using 400, 500 or 600 MHz spectrometers. The data are reported as follows: chemical shift in ppm from internal tetramethylsilane on the  $\delta$  scale, multiplicity (br = broad, s = singlet, d = doublet, t = triplet, q = quartet, m = multiplet), coupling constants (Hz), and integration. High resolution mass spectra were acquired on an LTQ FT spectrometer, and were obtained by peak matching. Melting points are reported uncorrected. Analytical thin layer chromatography was performed on 0.25 mm extra hard silica gel plates with UV254 fluorescent indicator. Chromatography was performed using with 300-400 mesh silica gel ( $\text{SiO}_2$ ). Unless otherwise noted, all reagents and solvents were obtained from commercial sources and, where appropriate, purified prior to use.

## 2. Optimization tables for the formation of **2a** and **3a**

**Table S1.** Optimization Conditions for formation of **2a**.<sup>a</sup>

| entry           | Cat.                                      | solvent        | T (°C) | <b>2a</b> % <sup>b</sup> | <b>3a</b> % <sup>b</sup> |
|-----------------|-------------------------------------------|----------------|--------|--------------------------|--------------------------|
| 1               | -                                         | THF            | 80     | <5                       | <5                       |
| 2               | $\text{FeCl}_3 \cdot 6\text{H}_2\text{O}$ | THF            | 80     | 33                       | <5                       |
| 3               | $\text{FeCl}_3$                           | THF            | 80     | 39                       | <5                       |
| 4               | $\text{FeCl}_3$                           | MeCN           | 80     | 30                       | <5                       |
| 5               | $\text{FeCl}_3$                           | toluene        | 80     | 38                       | <5                       |
| 6               | $\text{FeCl}_3$                           | DCE            | 80     | 24                       | <5                       |
| 7               | $\text{FeCl}_3$                           | DMSO           | 80     | 27                       | <5                       |
| 8               | $\text{FeCl}_3$                           | dioxane        | 80     | 21                       | <5                       |
| 9               | $\text{FeCl}_3$                           | MeOH           | 80     | 46                       | <5                       |
| 10              | $\text{FeCl}_3$                           | <i>t</i> -BuOH | 80     | 51                       | <5                       |
| 11              | $\text{FeCl}_3$                           | <i>i</i> -PrOH | 80     | 56                       | <5                       |
| 12 <sup>c</sup> | $\text{FeCl}_3$                           | <i>i</i> -PrOH | 80     | 65                       | <5                       |
| 13 <sup>d</sup> | $\text{FeCl}_3$                           | <i>i</i> -PrOH | 80     | 35                       | <5                       |
| 14 <sup>e</sup> | $\text{FeCl}_3$                           | <i>i</i> -PrOH | 80     | 52                       | <5                       |
| 15 <sup>c</sup> | $\text{FeCl}_3$                           | <i>i</i> -PrOH | 70     | 58                       | <5                       |
| 16 <sup>c</sup> | $\text{FeCl}_3$                           | <i>i</i> -PrOH | 100    | 64                       | <5                       |

|    |                      |                |    |    |    |
|----|----------------------|----------------|----|----|----|
| 17 | FeCl <sub>2</sub>    | <i>i</i> -PrOH | 80 | 17 | <5 |
| 18 | Fe(OTf) <sub>2</sub> | <i>i</i> -PrOH | 80 | 32 | <5 |
| 19 | Fe(OTf) <sub>3</sub> | <i>i</i> -PrOH | 80 | 33 | <5 |
| 20 | CuCl                 | <i>i</i> -PrOH | 80 | <5 | <5 |
| 21 | Pd(OAc) <sub>2</sub> | <i>i</i> -PrOH | 80 | 11 | <5 |

<sup>a</sup>Reaction conditions: **1a** (0.2 mmol), Cat. (20 mol% unless noted), solvent (2 mL), 80 °C, 12–24 h; <sup>b</sup>Isolated yield; <sup>c</sup>3Å MS (200 mg) was added; <sup>d</sup>4Å MS (200 mg) was added; <sup>e</sup>5Å MS (200 mg) was added.

**Table S2.** Optimization Conditions for formation of **3a**.<sup>a</sup>

| entry           | Cat. / L                                                  | solvent        | T (°C) | <b>2a</b> % <sup>b</sup> | <b>3a</b> % <sup>b</sup> |
|-----------------|-----------------------------------------------------------|----------------|--------|--------------------------|--------------------------|
| 1               | FeCl <sub>3</sub> /L1                                     | <i>i</i> -PrOH | 80     | 10                       | 31                       |
| 2               | FeCl <sub>3</sub> /L1                                     | MeCN           | 80     | 14                       | 38                       |
| 3               | FeCl <sub>3</sub> •6H <sub>2</sub> O/ L1                  | MeCN           | 80     | 18                       | 43                       |
| 4               | FeCl <sub>3</sub> •6H <sub>2</sub> O/ L1                  | DCE            | 80     | 15                       | 26                       |
| 5               | FeCl <sub>3</sub> •6H <sub>2</sub> O/ L1                  | toluene        | 80     | <5                       | 60                       |
| 6               | FeCl <sub>3</sub> •6H <sub>2</sub> O/ L1                  | DMSO           | 80     | <5                       | 57                       |
| 7               | FeCl <sub>3</sub> •6H <sub>2</sub> O/ L1                  | DMF            | 80     | <5                       | 63                       |
| 8               | FeCl <sub>3</sub> •6H <sub>2</sub> O/ L1                  | dioxane        | 80     | <5                       | 78                       |
| 9               | FeCl <sub>3</sub> •6H <sub>2</sub> O/ L1                  | THF            | 80     | <5                       | 79                       |
| 10              | FeCl <sub>3</sub> •6H <sub>2</sub> O/ L1                  | THF            | 60     | <5                       | 75                       |
| 11              | FeCl <sub>3</sub> •6H <sub>2</sub> O/ L1                  | THF            | 40     | <5                       | 50                       |
| 12              | FeCl <sub>3</sub> •6H <sub>2</sub> O/ L1                  | THF            | 25     | <5                       | <5                       |
| 13              | FeCl <sub>3</sub> •6H <sub>2</sub> O/ L1                  | THF            | 100    | <5                       | 58                       |
| 14 <sup>c</sup> | FeCl <sub>3</sub> •6H <sub>2</sub> O/ L1                  | THF            | 80     | <5                       | 78                       |
| 15 <sup>d</sup> | FeCl <sub>3</sub> •6H <sub>2</sub> O/ L1                  | THF            | 80     | <5                       | 59                       |
| 16              | FeCl <sub>3</sub> •6H <sub>2</sub> O/ L2                  | THF            | 80     | <5                       | 32                       |
| 17              | FeCl <sub>3</sub> •6H <sub>2</sub> O/ L3                  | THF            | 80     | <5                       | 73                       |
| 18              | FeCl <sub>3</sub> •6H <sub>2</sub> O/ L4                  | THF            | 80     | <5                       | 71                       |
| 19              | Fe(ClO <sub>4</sub> ) <sub>3</sub> •9H <sub>2</sub> O/ L1 | THF            | 80     | <5                       | 36                       |
| 20              | Fe(OTf) <sub>3</sub> / L1                                 | THF            | 80     | <5                       | 24                       |
| 21              | FeCl <sub>2</sub> / L1                                    | THF            | 80     | <5                       | <5                       |

|    |                                  |      |    |    |    |
|----|----------------------------------|------|----|----|----|
| 22 | Fe(OTf) <sub>2</sub> / <b>L1</b> | THF  | 80 | <5 | <5 |
| 23 | Cu(OAc) <sub>2</sub> / <b>L1</b> | MeCN | 80 | 10 | <5 |
| 24 | CuCl/ <b>L1</b>                  | MeCN | 80 | 6  | <5 |
| 25 | Pd(OAc) <sub>2</sub> / <b>L1</b> | MeCN | 80 | <5 | 23 |

<sup>a</sup>Reaction conditions: **1a** (0.2 mmol), Cat. (20 mol% unless noted), **L** (40 mol% unless noted), solvent (2 mL), 25 °C, 7–24 h; <sup>b</sup>Isolated yield; <sup>c</sup> FeCl<sub>3</sub>•6H<sub>2</sub>O (20 mol%), **L1** (60 mol%); <sup>d</sup> FeCl<sub>3</sub>•6H<sub>2</sub>O (10 mol%), **L1** (20 mol%).

### 3. Synthesis of tetrasubstituted pyridines **2**

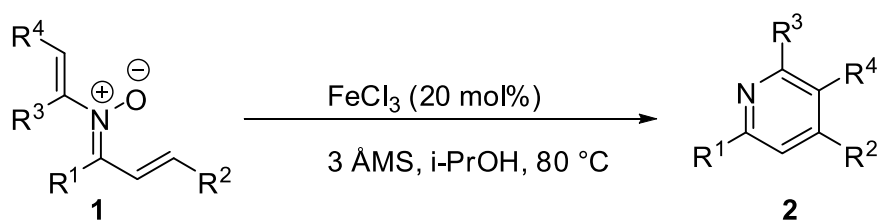

**General procedure A:** A Teflon-sealed flask was charged with nitron **1** (0.2 mmol), FeCl<sub>3</sub> (7 mg, 20 mol%), 3 ÅMS (200 mg) under N<sub>2</sub> atmosphere. *i*-PrOH (2 mL) was then added via syringe and the reaction vessel was once again sealed with a Teflon cap. The reaction mixture was stirred at 25 °C for 5 min and then heated at 80 °C for 12–15 h until nitron **1** was consumed completely (monitored by TLC). At this time, the solvent was removed under reduced pressure and the crude product was purified by flash column chromatography (the crude residue was dry loaded on silica gel, 1/50 to 1/20, ethyl acetate/petroleum ether) to afford tetrasubstituted pyridines **2**.

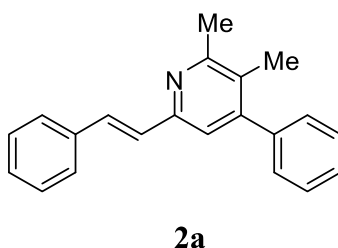

**(*E*)-2,3-Dimethyl-4-phenyl-6-styrylpyridine (**2a**)**<sup>[1]</sup>, light yellow solid, 0.036 g, 65% yield. Mp: 101–102 °C; <sup>1</sup>H NMR (400 MHz, CDCl<sub>3</sub>): δ 7.49–7.45 (m, 3H), 7.39–7.32 (m, 3H), 7.29–7.17 (m, 5H), 7.12–7.08 (m, 2H), 2.54 (s, 3H), 2.11 (s, 3H); <sup>13</sup>C NMR (100 MHz, CDCl<sub>3</sub>): δ 157.7, 151.9, 149.9, 140.0, 136.7, 131.5, 128.7, 128.6, 128.4, 128.3, 127.9, 127.7, 127.5, 126.9, 120.4, 23.6, 16.2; HRMS (ESI) *m/z* calcd for



$C_{21}H_{20}N$  (M+H)<sup>+</sup> 286.1590, found 286.1578.

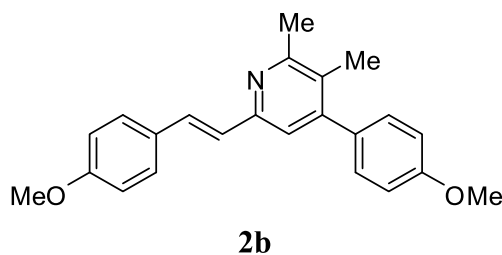

**(E)-4-(4-Methoxyphenyl)-6-(4-methoxystyryl)-2,3-dimethylpyridine (2b)**, light yellow solid, 0.016 g, 23% yield. Mp: 115–116 °C; <sup>1</sup>H NMR (400 MHz, CDCl<sub>3</sub>): δ 7.44–7.40 (m, 3H), 7.19–7.17 (m, 2H), 7.06 (s, 1H), 6.99 (d, *J* = 16.4 Hz, 1H), 6.92–6.90 (m, 2H), 6.83–6.81 (m, 2H), 3.79 (s, 3H), 3.75 (s, 3H), 2.53 (s, 3H), 2.12 (s, 3H); <sup>13</sup>C NMR (100 MHz, CDCl<sub>3</sub>): δ 159.6, 159.2, 157.4, 152.2, 149.6, 132.4, 131.1, 129.9, 129.8, 128.2, 127.2, 126.2, 120.2, 114.1, 113.7, 55.3, 55.3, 23.6, 16.2; IR (thin film) 2976, 2899, 1651, 1453, 1380, 1327, 1087, 973, 881, 692 cm<sup>-1</sup>; HRMS (ESI) *m/z* calcd for C<sub>23</sub>H<sub>24</sub>NO<sub>2</sub> (M+H)<sup>+</sup> 346.1802, found 346.1778.

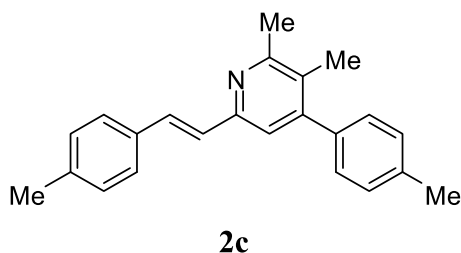

**(E)-2,3-Dimethyl-6-(4-methylstyryl)-4-*p*-tolylpyridine (2c)**, yellow oil, 0.035 g, 56% yield. <sup>1</sup>H NMR (400 MHz, CDCl<sub>3</sub>): δ 7.44–7.36 (m, 3H), 7.18–7.11 (m, 4H), 7.08–7.02 (m, 4H), 2.52 (s, 3H), 2.33 (s, 3H), 2.26 (s, 3H), 2.10 (s, 3H); <sup>13</sup>C NMR (100 MHz, CDCl<sub>3</sub>): δ 157.5, 152.1, 149.9, 137.9, 137.4, 137.1, 134.2, 131.4, 129.3, 128.9, 128.6, 127.4, 127.3, 126.8, 120.3, 23.6, 21.2, 21.2, 16.1; IR (thin film) 2955, 2924, 2856, 1583, 1513, 1456, 1380, 971, 821, 742 cm<sup>-1</sup>; HRMS (ESI) *m/z* calcd for C<sub>23</sub>H<sub>24</sub>N (M+H)<sup>+</sup> 314.1903, found 314.1882.

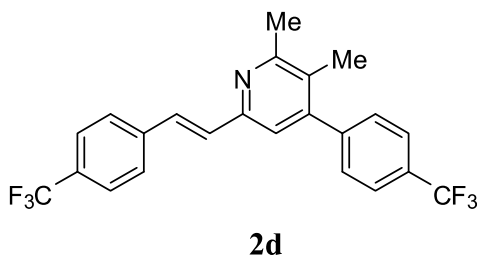

**(E)-2,3-Dimethyl-4-(4-(trifluoromethyl)phenyl)-6-(4-(trifluoromethyl)styryl)pyri**

**dine (2d)**, yellow oil, 0.045 g, 53% yield.  $^1\text{H}$  NMR (500 MHz,  $\text{CDCl}_3$ ):  $\delta$  7.91–7.85 (m, 2H), 7.83–7.74 (m, 5H), 7.60 (d,  $J$  = 8.0 Hz, 2H), 7.40–7.36 (m, 1H), 7.29–7.28 (m, 1H), 2.78 (s, 3H), 2.33 (s, 3H);  $^{13}\text{C}$  NMR (125 MHz,  $\text{CDCl}_3$ ):  $\delta$  158.3, 151.4, 148.6, 143.5, 141.7, 140.3, 138.0, 130.3, 130.1 (q,  $J$  = 31.9 Hz), 129.6 (q,  $J$  = 236.1 Hz), 129.1, 127.2, 127.0, 125.9 (q,  $J$  = 36.3 Hz), 125.6 (q,  $J$  = 27.4 Hz), 125.3 (q,  $J$  = 270.5 Hz), 120.7, 23.6, 16.1;  $^{19}\text{F}$  NMR (100 MHz,  $\text{CDCl}_3$ ):  $\delta$  -62.5; IR (thin film) 2926, 2857, 1657, 1613, 1585, 1325, 1016, 968, 841, 685  $\text{cm}^{-1}$ ; HRMS (ESI)  $m/z$  calcd for  $\text{C}_{23}\text{H}_{18}\text{F}_6\text{N}(\text{M}+\text{H})^+$  422.1338, found 422.1311.

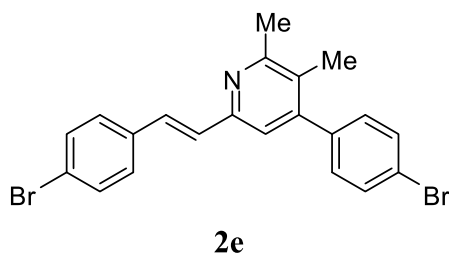

**(E)-4-(4-Bromophenyl)-6-(4-bromostyryl)-2,3-dimethylpyridine (2e)**, light yellow solid, 0.051 g, 58% yield. Mp: 102–103  $^{\circ}\text{C}$ ;  $^1\text{H}$  NMR (600 MHz,  $\text{CDCl}_3$ ):  $\delta$  7.60–7.58 (m, 2H), 7.52–7.47 (m, 3H), 7.42–7.41 (m, 2H), 7.20–7.16 (m, 3H), 7.13–7.10 (m, 1H), 2.62 (s, 3H), 2.17 (s, 3H);  $^{13}\text{C}$  NMR (150 MHz,  $\text{CDCl}_3$ ):  $\delta$  157.9, 151.6, 148.9, 138.7, 135.8, 131.8, 131.6, 130.6, 130.4, 128.5, 128.4, 127.7, 122.1, 121.9, 120.4, 23.5, 16.1; IR (thin film) 2923, 1592, 1486, 1453, 1381, 1070, 1006, 962, 823  $\text{cm}^{-1}$ ; HRMS (ESI)  $m/z$  calcd for  $\text{C}_{21}\text{H}_{18}\text{Br}_2\text{N}(\text{M}+\text{H})^+$  441.9801, found 441.9771.

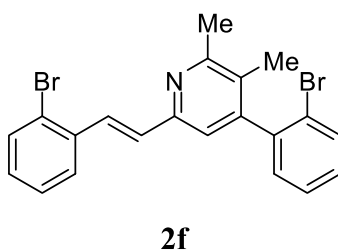

**(E)-4-(2-Bromophenyl)-6-(2-bromostyryl)-2,3-dimethylpyridine (2f)**, light yellow solid, 0.047 g, 54% yield. Mp: 118–119  $^{\circ}\text{C}$ ;  $^1\text{H}$  NMR (600 MHz,  $\text{CDCl}_3$ ):  $\delta$  7.86 (d,  $J$  = 15.6 Hz, 1H), 7.73–7.68 (m, 2H), 7.58 (d,  $J$  = 7.8 Hz, 1H), 7.42–7.39 (m, 1H), 7.32–7.26 (m, 2H), 7.22–7.21 (m, 1H), 7.18–7.11 (m, 3H), 2.64 (s, 3H), 2.06 (s, 3H);  $^{13}\text{C}$  NMR (150 MHz,  $\text{CDCl}_3$ ):  $\delta$  157.5, 151.6, 140.7, 136.7, 133.1, 132.8, 130.2, 129.4,

129.2, 127.6, 127.4, 127.0, 124.4, 122.7, 120.0, 23.3, 15.9; IR (thin film) 2977, 2899, 1649, 1453, 1381, 1275, 1087, 1048, 880, 692  $\text{cm}^{-1}$ ; HRMS (ESI)  $m/z$  calcd for  $\text{C}_{21}\text{H}_{18}\text{Br}_2\text{N}(\text{M}+\text{H})^+$  441.9801, found 441.9780.

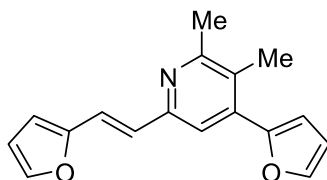

**2g**

**(*E*)-4-(Furan-2-yl)-6-(2-(furan-2-yl)vinyl)-2,3-dimethylpyridine (2g)**, yellow oil, 0.025 g, 47% yield.  $^1\text{H}$  NMR (500 MHz,  $\text{CDCl}_3$ ):  $\delta$  7.57 (s, 1H), 7.47–7.42 (m, 3H), 7.08 (d,  $J = 15.5$  Hz, 1H), 6.70 (d,  $J = 3.5$  Hz, 1H), 6.55–6.54 (m, 1H), 6.44–6.42 (m, 2H), 2.62 (s, 3H), 2.42 (s, 3H);  $^{13}\text{C}$  NMR (125 MHz,  $\text{CDCl}_3$ ):  $\delta$  158.1, 153.2, 151.8, 151.6, 142.9, 142.5, 137.5, 126.3, 125.6, 119.2, 117.8, 111.7, 111.6, 111.3, 109.9, 23.9, 16.6; IR (thin film) 3119, 2924, 2856, 1640, 1597, 1454, 1014, 965, 885, 738  $\text{cm}^{-1}$ ; HRMS (ESI)  $m/z$  calcd for  $\text{C}_{17}\text{H}_{16}\text{NO}_2(\text{M}+\text{H})^+$  266.1176, found 266.1162.

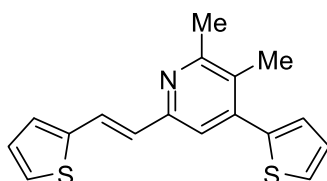

**2h**

**(*E*)-2,3-Dimethyl-4-(thiophen-2-yl)-6-(2-(thiophen-2-yl)vinyl)pyridine(2h)**, light yellow solid, 0.031 g, 53% yield. Mp: 72–73  $^{\circ}\text{C}$ ;  $^1\text{H}$  NMR (400 MHz,  $\text{CDCl}_3$ ):  $\delta$  7.75 (d,  $J = 16.0$  Hz, 1H), 7.42–7.41 (m, 1H), 7.23–7.21 (m, 2H), 7.15–7.13 (m, 3H), 7.02–7.00 (m, 1H), 6.98 (d,  $J = 16.0$  Hz, 1H), 2.62 (s, 3H), 2.35 (s, 3H);  $^{13}\text{C}$  NMR (100 MHz,  $\text{CDCl}_3$ ):  $\delta$  158.1, 151.6, 142.5, 142.3, 140.8, 127.7, 127.6, 127.6, 127.4, 127.3, 127.2, 126.3, 125.1, 124.8, 120.9, 23.8, 16.4; IR (thin film) 3071, 2922, 2855, 1583, 1543, 1454, 1387, 958, 854, 698  $\text{cm}^{-1}$ ; HRMS (ESI)  $m/z$  calcd for  $\text{C}_{17}\text{H}_{16}\text{NS}_2(\text{M}+\text{H})^+$  298.0719, found 298.0699.

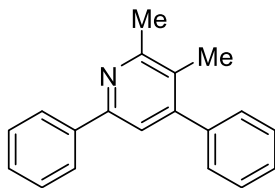

**2i**

**2,3-Dimethyl-4,6-diphenylpyridine (2i)**<sup>[1]</sup>, light yellow solid, 0.038 g, 74% yield. Mp: 57–58 °C; <sup>1</sup>H NMR (600 MHz, CDCl<sub>3</sub>): δ 8.01–7.99 (m, 2H), 7.48–7.35 (m, 9H), 2.68 (s, 3H), 2.23 (s, 3H); <sup>13</sup>C NMR (150 MHz, CDCl<sub>3</sub>): δ 157.7, 153.6, 150.3, 140.2, 139.5, 128.8, 128.6, 128.5, 128.3, 127.7, 127.4, 126.8, 119.4, 23.6, 16.0; HRMS (ESI) *m/z* calcd for C<sub>19</sub>H<sub>18</sub>N (M+H)<sup>+</sup> 260.1434, found 260.1417.

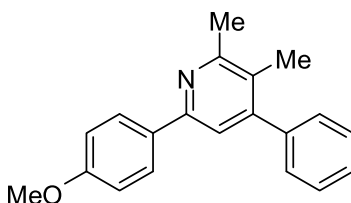

**2j**

**6-(4-Methoxyphenyl)-2,3-dimethyl-4-phenylpyridine (2j)**, light yellow solid, 0.038 g, 65% yield. Mp: 80–81 °C; <sup>1</sup>H NMR (600 MHz, CDCl<sub>3</sub>): δ 7.97–7.95 (m, 2H), 7.48–7.45 (m, 2H), 7.42–7.39 (m, 2H), 7.35–7.34 (m, 2H), 6.98–6.97 (m, 2H), 3.85 (s, 3H), 2.66 (s, 3H), 2.21 (s, 3H); <sup>13</sup>C NMR (150 MHz, CDCl<sub>3</sub>): δ 160.1, 157.5, 153.3, 150.2, 140.3, 132.2, 128.8, 128.3, 128.0, 127.6, 126.6, 118.6, 114.0, 55.3, 23.6, 16.0; IR (thin film) 2925, 1609, 1452, 1376, 1253, 1168, 974, 837, 776, 703 cm<sup>-1</sup>; HRMS (ESI) *m/z* calcd for C<sub>20</sub>H<sub>20</sub>NO (M+H)<sup>+</sup> 290.1539, found 290.1526.

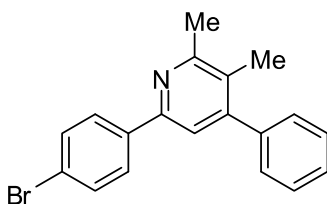

**2k**

**6-(4-Bromophenyl)-2,3-dimethyl-4-phenylpyridine (2k)**, light yellow solid, 0.045 g, 67% yield. Mp: 88–89 °C; <sup>1</sup>H NMR (400 MHz, CDCl<sub>3</sub>): δ 7.90–7.88 (m, 2H), 7.57–7.55 (m, 2H), 7.49–7.42 (m, 4H), 7.35–7.32 (m, 2H), 3.85 (s, 3H), 2.66 (s, 3H), 2.22 (s, 3H); <sup>13</sup>C NMR (100 MHz, CDCl<sub>3</sub>): δ 157.9, 152.4, 150.3, 140.1, 138.5, 131.7, 128.7, 128.4, 128.3, 127.8, 127.8, 122.8, 119.0, 23.7, 16.1; IR (thin film) 2924, 1663,

1589, 1547, 1492, 1451, 1008, 829, 771, 702  $\text{cm}^{-1}$ ; HRMS (ESI)  $m/z$  calcd for  $\text{C}_{19}\text{H}_{17}\text{BrN}$  ( $\text{M}+\text{H}$ ) $^{+}$  338.0539, found 338.0523.

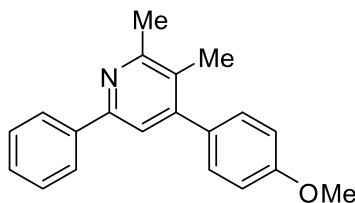

**2l**

**4-(4-Methoxyphenyl)-2,3-dimethyl-6-phenylpyridine (2l)**, light yellow solid, 0.029 g, 50% yield. Mp: 99–100  $^{\circ}\text{C}$ ;  $^1\text{H}$  NMR (400 MHz,  $\text{CDCl}_3$ ):  $\delta$  8.00 (d,  $J = 4.8$  Hz, 2H), 7.46–7.44 (m, 3H), 7.39–7.36 (m, 1H), 7.30 (d,  $J = 5.6$  Hz, 2H), 7.01 (d,  $J = 6.0$  Hz, 2H), 3.88 (s, 3H), 2.66 (s, 3H), 2.24 (s, 3H);  $^{13}\text{C}$  NMR (100 MHz,  $\text{CDCl}_3$ ):  $\delta$  159.2, 157.7, 153.6, 149.8, 139.7, 132.5, 130.0, 128.6, 128.3, 127.5, 126.8, 119.5, 113.8, 55.3, 23.7, 16.1; IR (thin film) 2924, 1609, 1510, 1455, 1380, 1244, 1170, 826, 687  $\text{cm}^{-1}$ ; HRMS (ESI)  $m/z$  calcd for  $\text{C}_{20}\text{H}_{20}\text{NO}$  ( $\text{M}+\text{H}$ ) $^{+}$  290.1539, found 290.1526.

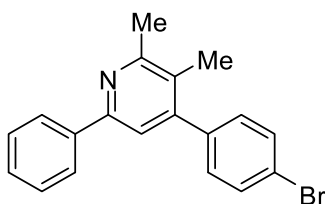

**2m**

**4-(4-Bromophenyl)-2,3-dimethyl-6-phenylpyridine (2m)**, light yellow solid, 0.041 g, 61% yield. Mp: 89–90  $^{\circ}\text{C}$ ;  $^1\text{H}$  NMR (600 MHz,  $\text{CDCl}_3$ ):  $\delta$  8.00 (d,  $J = 4.8$  Hz, 2H), 7.61 (d,  $J = 5.6$  Hz, 2H), 7.46–7.44 (m, 2H), 7.40–7.38 (m, 2H), 7.23 (d,  $J = 5.2$  Hz, 2H), 2.67 (s, 3H), 2.21 (s, 3H);  $^{13}\text{C}$  NMR (150 MHz,  $\text{CDCl}_3$ ):  $\delta$  157.9, 153.8, 149.0, 139.3, 139.1, 131.5, 130.4, 128.6, 128.5, 127.2, 126.8, 122.0, 119.0, 23.6, 16.0; IR (thin film) 2924, 1595, 1455, 1377, 1325, 1166, 1069, 826, 775, 670  $\text{cm}^{-1}$ ; HRMS (ESI)  $m/z$  calcd for  $\text{C}_{19}\text{H}_{17}\text{BrN}$  ( $\text{M}+\text{H}$ ) $^{+}$  338.0539, found 338.0518.

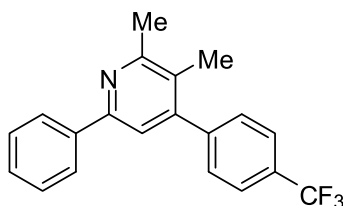

**2n**

**2,3-Dimethyl-6-phenyl-4-(4-(trifluoromethyl)phenyl)pyridine (2n)**, light yellow

solid, 0.039 g, 60% yield. Mp: 79–80 °C;  $^1\text{H}$  NMR (600 MHz,  $\text{CDCl}_3$ ):  $\delta$  8.01–7.99 (m, 2H), 7.75 (d,  $J = 9.6$  Hz, 2H), 7.48–7.45 (m, 4H), 7.42–7.38 (m, 2H), 2.69 (s, 3H), 2.21 (s, 3H);  $^{13}\text{C}$  NMR (150 MHz,  $\text{CDCl}_3$ ):  $\delta$  158.0, 153.9, 148.9, 143.9, 139.2, 130.1 (q,  $J = 39.5$  Hz), 129.2, 128.7, 128.6, 127.1 (q,  $J = 267.8$  Hz), 126.8, 125.4 (q,  $J = 33.0$  Hz), 125.2, 118.9, 23.6, 16.0;  $^{19}\text{F}$  NMR (100 MHz,  $\text{CDCl}_3$ ):  $\delta$  –62.5; IR (thin film) 3066, 2927, 1665, 1577, 1325, 1166, 1067, 838, 776, 695  $\text{cm}^{-1}$ ; HRMS (ESI)  $m/z$  calcd for  $\text{C}_{20}\text{H}_{17}\text{F}_3\text{N}$  ( $\text{M}+\text{H}$ ) $^+$  328.1308, found 328.1291.

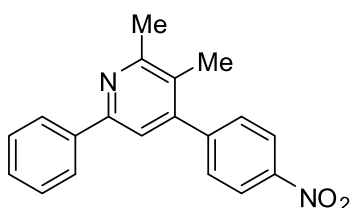

**2o**

**2,3-Dimethyl-4-(4-nitrophenyl)-6-phenylpyridine (2o)**, light yellow solid, 0.038 g, 62% yield. Mp: 178–179 °C;  $^1\text{H}$  NMR (400 MHz,  $\text{CDCl}_3$ ):  $\delta$  8.34 (d,  $J = 8.8$  Hz, 2H), 8.01–7.98 (m, 2H), 7.53–7.51 (m, 2H), 7.47–7.39 (m, 4H), 2.68 (s, 3H), 2.21 (s, 3H);  $^{13}\text{C}$  NMR (100 MHz,  $\text{CDCl}_3$ ):  $\delta$  158.2, 154.0, 147.9, 147.7, 146.9, 139.1, 129.8, 128.7, 128.7, 126.8, 126.7, 123.7, 118.5, 23.6, 16.0; IR (thin film) 2925, 1655, 1512, 1460, 1344, 1167, 973, 841, 693  $\text{cm}^{-1}$ ; HRMS (ESI)  $m/z$  calcd for  $\text{C}_{19}\text{H}_{17}\text{N}_2\text{O}_2$  ( $\text{M}+\text{H}$ ) $^+$  305.1285, found 305.1264.

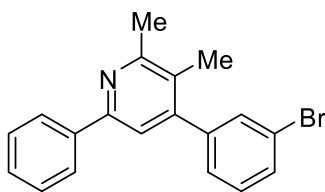

**2p**

**4-(3-Bromophenyl)-2,3-dimethyl-6-phenylpyridine (2p)**, light yellow solid, 0.052 g, 76% yield. Mp: 98–99 °C;  $^1\text{H}$  NMR (600 MHz,  $\text{CDCl}_3$ ):  $\delta$  7.91 (d,  $J = 8.0$  Hz, 2H), 7.47–7.17 (m, 8H), 2.58 (s, 3H), 2.12 (s, 3H);  $^{13}\text{C}$  NMR (150 MHz,  $\text{CDCl}_3$ ):  $\delta$  157.9, 153.8, 148.6, 142.3, 139.3, 131.7, 130.8, 129.9, 128.6, 128.5, 127.4, 127.2, 126.8, 122.4, 119.0, 23.6, 16.0; IR (thin film) 2960, 1652, 1489, 1450, 1325, 1186, 1070, 827, 773, 688  $\text{cm}^{-1}$ ; HRMS (ESI)  $m/z$  calcd for  $\text{C}_{19}\text{H}_{17}\text{BrN}$  ( $\text{M}+\text{H}$ ) $^+$  338.0539, found 338.0524.

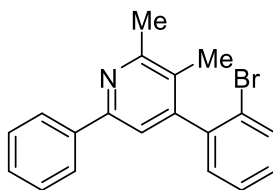

**2q**

**4-(2-Bromophenyl)-2,3-dimethyl-6-phenylpyridine (2q)**, light yellow solid, 0.039 g, 58% yield. Mp: 106–107 °C;  $^1\text{H}$  NMR (400 MHz,  $\text{CDCl}_3$ ):  $\delta$  7.93 (d,  $J$  = 7.2 Hz, 2H), 7.62 (d,  $J$  = 8.0 Hz, 1H), 7.38–7.27 (m, 5H), 7.21–7.14 (m, 2H), 2.59 (s, 3H), 2.00 (s, 3H);  $^{13}\text{C}$  NMR (100 MHz,  $\text{CDCl}_3$ ):  $\delta$  157.6, 153.6, 149.3, 141.0, 139.5, 132.8, 130.3, 129.3, 128.6, 128.5, 128.0, 127.4, 126.8, 122.8, 118.9, 23.5, 15.7; IR (thin film) 3058, 2923, 2855, 1659, 1585, 1432, 1379, 1026, 979, 692  $\text{cm}^{-1}$ ; HRMS (ESI)  $m/z$  calcd for  $\text{C}_{19}\text{H}_{17}\text{BrN}$  ( $\text{M}+\text{H}$ ) $^+$  338.0539, found 338.0518.

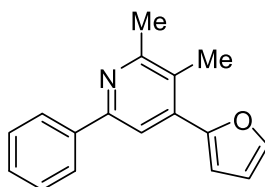

**2r**

**4-(Furan-2-yl)-2,3-dimethyl-6-phenylpyridine (2r)**, light yellow solid, 0.033 g, 67% yield. Mp: 64–65 °C;  $^1\text{H}$  NMR (400 MHz,  $\text{CDCl}_3$ ):  $\delta$  8.04 (d,  $J$  = 7.6 Hz, 2H), 7.85 (s, 1H), 7.59–7.58 (m, 1H), 7.49–7.45 (m, 2H), 7.41–7.39 (m, 1H), 6.74 (d,  $J$  = 3.6 Hz, 1H), 6.57–6.56 (m, 1H), 2.68 (s, 3H), 2.47 (s, 3H);  $^{13}\text{C}$  NMR (100 MHz,  $\text{CDCl}_3$ ):  $\delta$  158.0, 154.0, 151.8, 142.9, 139.6, 137.8, 128.6, 128.4, 126.8, 125.6, 116.0, 111.6, 111.4, 23.9, 16.5; IR (thin film) 3056, 2924, 2856, 1664, 1595, 1553, 1451, 1026, 741, 694  $\text{cm}^{-1}$ ; HRMS (ESI)  $m/z$  calcd for  $\text{C}_{17}\text{H}_{16}\text{NO}$  ( $\text{M}+\text{H}$ ) $^+$  250.1226, found 250.1209.

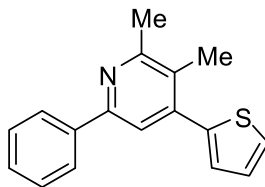

**2s**

**2,3-Dimethyl-6-phenyl-4-(thiophen-2-yl)pyridine (2s)**, light yellow solid, 0.039 g, 74% yield. Mp: 62–63 °C;  $^1\text{H}$  NMR (400 MHz,  $\text{CDCl}_3$ ):  $\delta$  8.03–8.00 (m, 2H), 7.59 (s, 1H), 7.49–7.37 (m, 4H), 7.16–7.14 (m, 2H), 2.69 (s, 3H), 2.40 (s, 3H);  $^{13}\text{C}$  NMR (100

MHz, CDCl<sub>3</sub>):  $\delta$  158.1, 153.8, 142.5, 141.0, 139.4, 128.6, 128.5, 127.7, 127.6, 127.3, 126.8, 126.3, 119.7, 23.9, 16.3; IR (thin film) 2925, 1640, 1459, 1379, 1165, 974, 1048, 880, 692 cm<sup>-1</sup>; HRMS (ESI)  $m/z$  calcd for C<sub>17</sub>H<sub>16</sub>NS (M+H)<sup>+</sup> 266.0998, found 266.0980.

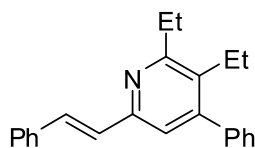

**2ac**

**(E)-2,3-Diethyl-4-phenyl-6-styrylpyridine (2ac)**, yellow oil, 0.037 g, 59% yield. <sup>1</sup>H NMR (400 MHz, CDCl<sub>3</sub>):  $\delta$  7.71–7.69 (m, 3H), 7.58–7.53 (m, 3H), 7.50–7.32 (m, 7H), 3.11 (q,  $J$  = 14.4 Hz, 2H), 2.78 (q,  $J$  = 14.4 Hz, 2H), 1.58 (t,  $J$  = 7.2 Hz, 3H), 1.18 (t,  $J$  = 7.2 Hz, 3H); <sup>13</sup>C NMR (100 MHz, CDCl<sub>3</sub>):  $\delta$  161.5, 152.0, 150.4, 140.4, 137.0, 133.1, 131.7, 128.6, 128.5, 128.4, 128.2, 127.9, 127.5, 126.9, 120.5, 28.2, 21.7, 15.2, 14.1; IR (thin film) 3028, 2964, 2871, 1581, 1495, 1449, 1383, 969, 756, 699 cm<sup>-1</sup>; HRMS (ESI)  $m/z$  calcd for C<sub>23</sub>H<sub>24</sub>N (M+H)<sup>+</sup> 314.1903, found 314.1881.

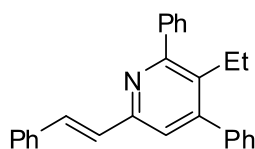

**2ad**

**(E)-3-Ethyl-2,4-diphenyl-6-styrylpyridine (2ad)**, yellow oil, 0.033 g, 45% yield. <sup>1</sup>H NMR (400 MHz, CDCl<sub>3</sub>):  $\delta$  7.47–7.44 (m, 5H), 7.39–7.28 (m, 8H), 7.24–7.13 (m, 5H), 2.57 (q,  $J$  = 14.0 Hz, 2H), 0.67 (t,  $J$  = 7.6 Hz, 3H); <sup>13</sup>C NMR (100 MHz, CDCl<sub>3</sub>):  $\delta$  159.7, 152.3, 151.0, 141.5, 140.1, 136.8, 133.6, 132.3, 128.8, 128.6, 128.5, 128.3, 128.3, 128.1, 128.0, 127.7, 127.7, 127.0, 121.5, 22.3, 14.8; IR (thin film) 3058, 2966, 2873, 1688, 1579, 1449, 1212, 970, 754, 693 cm<sup>-1</sup>; HRMS (ESI)  $m/z$  calcd for C<sub>27</sub>H<sub>24</sub>N (M+H)<sup>+</sup> 362.1903, found 362.1884.

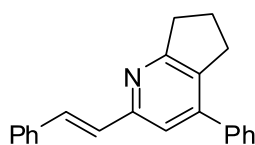

**2ae**

**(E)-4-Phenyl-2-styryl-6,7-dihydro-5H-cyclopenta[b]pyridine (2ae)**<sup>[2]</sup>, light yellow



solid, 0.027 g, 46% yield. Mp: 98–99 °C;  $^1\text{H}$  NMR (600 MHz,  $\text{CDCl}_3$ ):  $\delta$  7.54 (d,  $J$  = 16.2 Hz, 1H), 7.49 (d,  $J$  = 7.2 Hz, 2H), 7.41–7.36 (m, 4H), 7.32–7.30 (m, 1H), 7.27–7.25 (m, 2H), 7.18–7.12 (m, 3H), 3.03 (d,  $J$  = 7.8 Hz, 2H), 2.93 (d,  $J$  = 7.2 Hz, 2H), 2.05–2.00 (m, 2H);  $^{13}\text{C}$  NMR (150 MHz,  $\text{CDCl}_3$ ):  $\delta$  166.5, 154.3, 145.7, 138.7, 136.9, 133.3, 131.5, 128.9, 128.6, 128.5, 128.2, 128.1, 127.9, 126.9, 119.4, 34.6, 30.7, 23.5.

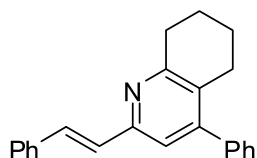

**2af**

**(*E*)-4-Phenyl-2-styryl-5,6,7,8-tetrahydroquinoline (2af)**<sup>[1]</sup>, light yellow solid, 0.032 g, 52% yield.  $^1\text{H}$  NMR (500 MHz,  $\text{CDCl}_3$ ):  $\delta$  7.57 (d,  $J$  = 7.5 Hz, 2H), 7.52 (d,  $J$  = 16.0 Hz, 1H), 7.46–7.38 (m, 3H), 7.37–7.32 (m, 4H), 7.28–7.25 (m, 1H), 7.21 (d,  $J$  = 17.0 Hz, 2H), 3.05 (t,  $J$  = 6.5 Hz, 2H), 2.64 (t,  $J$  = 6.0 Hz, 2H), 1.93–1.91 (m, 2H), 1.75–1.73 (m, 2H);  $^{13}\text{C}$  NMR (125 MHz,  $\text{CDCl}_3$ ):  $\delta$  157.5, 152.5, 150.0, 139.5, 136.9, 131.7, 128.7, 128.6, 128.5, 128.3, 128.0, 127.7, 126.9, 119.8, 33.2, 27.4, 23.0, 23.0.

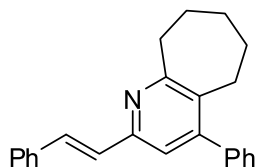

**2ag**

**(*E*)-4-Phenyl-2-styryl-6,7,8,9-tetrahydro-5H-cyclohepta[b]pyridine (2ag)**, light yellow solid, 0.036 g, 52% yield; Mp: 109–110 °C;  $^1\text{H}$  NMR (400 MHz,  $\text{CDCl}_3$ ):  $\delta$  7.47–7.44 (m, 3H), 7.35–7.33 (m, 2H), 7.30–7.28 (m, 1H), 7.26–7.23 (m, 2H), 7.20–7.19 (m, 2H), 7.17–7.14 (m, 1H), 7.10 (d,  $J$  = 15.6 Hz, 1H), 7.05 (s, 1H), 3.08 (t,  $J$  = 11.4 Hz, 2H), 2.64 (t,  $J$  = 10.8 Hz, 2H), 1.79–1.76 (m, 2H), 1.72–1.69 (m, 2H), 1.54–1.52 (m, 2H);  $^{13}\text{C}$  NMR (100 MHz,  $\text{CDCl}_3$ ):  $\delta$  164.0, 151.5, 149.3, 140.1, 136.9, 134.2, 131.6, 128.7, 128.6, 128.3, 128.2, 127.9, 127.5, 126.9, 120.5, 39.5, 32.2, 29.5, 27.9, 26.6; IR (thin film) 2922, 2851, 1638, 1583, 1444, 1383, 971, 757, 706, 689  $\text{cm}^{-1}$ ; HRMS (ESI)  $m/z$  calcd for  $\text{C}_{24}\text{H}_{24}\text{N}$  ( $\text{M}+\text{H}$ )<sup>+</sup> 326.1903, found 326.1881.

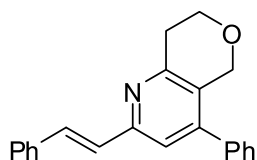

**2ah**

**(E)-4-Phenyl-2-styryl-7,8-dihydro-5H-pyrano[4,3-b]pyridine (2ah)**, light yellow solid, 0.024 g, 38% yield. Mp: 108–109 °C;  $^1\text{H}$  NMR (400 MHz,  $\text{CDCl}_3$ ):  $\delta$  7.51–7.47 (m, 3H), 7.40–7.34 (m, 3H), 7.30–7.27 (m, 2H), 7.22–7.21 (m, 3H), 7.15–7.11 (m, 2H), 4.59 (s, 2H), 4.03 (t,  $J = 5.6$  Hz, 2H), 3.07 (t,  $J = 5.6$  Hz, 2H);  $^{13}\text{C}$  NMR (100 MHz,  $\text{CDCl}_3$ ):  $\delta$  153.8, 153.7, 147.5, 137.7, 136.7, 132.6, 128.7, 128.6, 128.4, 128.3, 128.1, 127.9, 127.0, 126.6, 120.2, 66.5, 65.7, 32.2; IR (thin film) 3049, 2923, 2847, 1637, 1581, 1388, 1098, 968, 760, 695  $\text{cm}^{-1}$ ; HRMS (ESI)  $m/z$  calcd for  $\text{C}_{22}\text{H}_{20}\text{NO}$  ( $\text{M}+\text{H}$ ) $^+$  314.1539, found 314.1528.

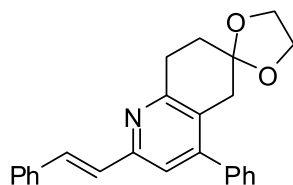

**2ai**

**(E)-4'-Phenyl-2'-styryl-7',8'-dihydro-5'H-spiro[[1,3]dioxolane-2,6'-quinoline] (2ai)**, yellow oil, 0.042 g, 56% yield.  $^1\text{H}$  NMR (400 MHz,  $\text{CDCl}_3$ ):  $\delta$  7.49 (d,  $J = 7.6$  Hz, 2H), 7.45 (d,  $J = 12.4$  Hz, 1H), 7.39–7.32 (m, 3H), 7.29–7.17 (m, 5H), 7.13–7.09 (m, 2H), 3.92–3.87 (m, 2H), 3.85–3.82 (m, 2H), 3.18 (t,  $J = 6.8$  Hz, 2H), 2.79 (s, 2H), 2.03 (t,  $J = 7.2$  Hz, 2H);  $^{13}\text{C}$  NMR (100 MHz,  $\text{CDCl}_3$ ):  $\delta$  160.0, 153.2, 150.3, 139.0, 136.8, 132.2, 128.6, 128.4, 128.3, 128.1, 127.9, 127.0, 125.7, 120.0, 107.9, 64.5, 38.1, 37.2, 33.8, 31.5, 29.7; IR (thin film) 3057, 2952, 2883, 1735, 1582, 1450, 1098, 971, 761, 701  $\text{cm}^{-1}$ ; HRMS (ESI)  $m/z$  calcd for  $\text{C}_{25}\text{H}_{24}\text{NO}_2$  ( $\text{M}+\text{H}$ ) $^+$  370.1802, found 370.1786.

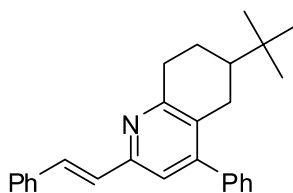

**2aj**

**(E)-6-tert-Butyl-4-phenyl-2-styryl-5,6,7,8-tetrahydroquinoline (2aj)**, light yellow solid, 0.043 g, 59% yield. Mp: 129–130 °C;  $^1\text{H}$  NMR (400 MHz,  $\text{CDCl}_3$ ):  $\delta$  7.46–7.43 (m, 2H), 7.39–7.36 (m, 1H), 7.35–7.27 (m, 3H), 7.24–7.20 (m, 4H), 7.16–7.13 (m, 1H), 7.11 (d,  $J$  = 16.0 Hz, 1H), 7.06 (s, 1H), 3.10–3.05 (m, 1H), 2.92–2.88 (m, 1H), 2.59 (d,  $J$  = 16.4 Hz, 1H), 2.32–2.25 (m, 1H), 2.01–1.98 (m, 1H), 1.41–1.28 (m, 2H), 0.77 (s, 9H);  $^{13}\text{C}$  NMR (100 MHz,  $\text{CDCl}_3$ ):  $\delta$  157.5, 152.4, 150.2, 139.5, 136.9, 131.6, 128.7, 128.6, 128.5, 128.4, 128.3, 127.9, 127.7, 126.9, 119.9, 44.6, 41.2, 34.1, 32.4, 28.6, 27.5, 27.2, 24.3; IR (thin film) 3028, 2959, 2868, 1634, 1580, 1537, 1446, 972, 759, 696  $\text{cm}^{-1}$ ; HRMS (ESI)  $m/z$  calcd for  $\text{C}_{27}\text{H}_{30}\text{N}$  ( $\text{M}+\text{H}$ ) $^+$  368.2373, found 368.2359.

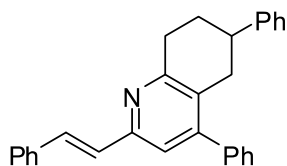

**2ak**

**(E)-4,6-Diphenyl-2-styryl-5,6,7,8-tetrahydroquinoline (2ak)**, light yellow solid, 0.044 g, 57% yield. Mp: 153–154 °C;  $^1\text{H}$  NMR (400 MHz,  $\text{CDCl}_3$ ):  $\delta$  7.51–7.44 (m, 3H), 7.35–7.27 (m, 5H), 7.24–7.19 (m, 5H), 7.17–7.13 (m, 5H), 3.21–3.07 (m, 2H), 2.88–2.68 (m, 3H), 2.16–2.00 (m, 2H);  $^{13}\text{C}$  NMR (100 MHz,  $\text{CDCl}_3$ ):  $\delta$  156.8, 152.9, 150.2, 145.9, 139.3, 136.9, 132.1, 128.7, 128.5, 128.4, 128.4, 128.2, 128.1, 128.0, 127.8, 127.0, 126.8, 126.3, 120.1, 40.7, 35.6, 33.5, 30.1; IR (thin film) 3026, 2925, 2860, 1631, 1579, 1536, 1444, 967, 758, 700  $\text{cm}^{-1}$ ; HRMS (ESI)  $m/z$  calcd for  $\text{C}_{29}\text{H}_{26}\text{N}$  ( $\text{M}+\text{H}$ ) $^+$  388.2060, found 388.2044.

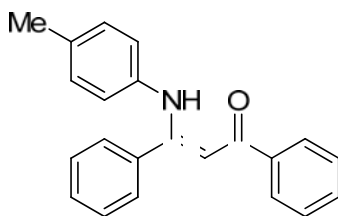

**2am**

**(Z)-1,3-Diphenyl-3-(p-tolylamino)prop-2-en-1-one (6)**<sup>[3]</sup>, light yellow solid, 0.016 g, 26% yield. Mp: 127–128 °C;  $^1\text{H}$  NMR (400 MHz,  $\text{CDCl}_3$ ):  $\delta$  12.82 (s, 1H), 7.89 (d,  $J$  = 6.8 Hz, 2H), 7.39–7.23 (m, 7H), 6.85 (d,  $J$  = 8.0 Hz, 2H), 6.62 (d,  $J$  = 8.4 Hz, 2H),

5.98 (s, 1H), 2.15 (s, 3H);  $^{13}\text{C}$  NMR (100 MHz,  $\text{CDCl}_3$ ):  $\delta$  189.4, 161.7, 139.9, 136.8, 135.9, 133.8, 131.1, 129.5, 129.3, 128.5, 128.4, 128.3, 127.2, 123.2, 96.5, 20.7;

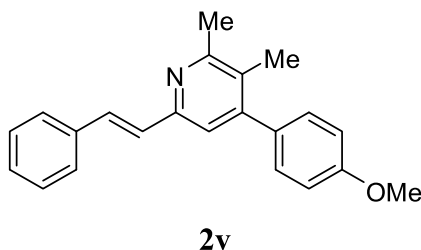

**(E)-6-(4-Methoxystyryl)-2,3-dimethyl-4-phenylpyridine (2v)**, light yellow solid, 0.029 g, 45% yield. Mp: 92–93 °C;  $^1\text{H}$  NMR (400 MHz,  $\text{CDCl}_3$ ):  $\delta$  7.57–7.53 (m, 3H), 7.36–7.34 (m, 2H), 7.27–7.25 (m, 3H), 7.18–7.16 (m, 2H), 6.99–6.98 (m, 2H), 3.86 (s, 3H), 2.61 (s, 3H), 2.20 (s, 3H);  $^{13}\text{C}$  NMR (100 MHz,  $\text{CDCl}_3$ ):  $\delta$  159.2, 157.6, 151.9, 149.6, 137.0, 132.3, 131.4, 129.9, 128.6, 128.4, 127.9, 127.7, 126.9, 120.6, 113.7, 55.3, 23.6, 16.2; IR (thin film) 2925, 1605, 1510, 1451, 1248, 1174, 1032, 971, 831, 694  $\text{cm}^{-1}$ ; HRMS (ESI)  $m/z$  calcd for  $\text{C}_{22}\text{H}_{22}\text{NO}$  ( $\text{M}+\text{H}$ ) $^+$  316.1696, found 316.1681.

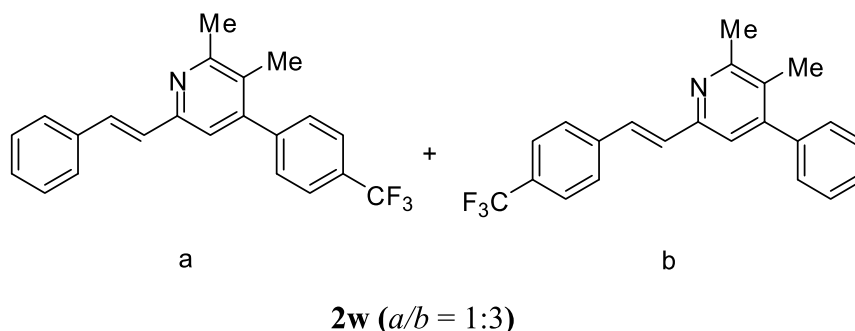

**Pyridine (2w, a/b = 1:3)**, light yellow oil, 0.037 g, 52% yield; *major isomer*:  $^1\text{H}$  NMR (600 MHz,  $\text{CDCl}_3$ ):  $\delta$  7.60–7.56 (m, 5H), 7.47–7.43 (m, 3H), 7.32–7.31 (m, 2H), 7.25–7.23 (m, 1H), 7.18–7.16 (m, 1H), 2.63 (s, 3H), 2.20 (s, 3H);  $^{13}\text{C}$  NMR (150 MHz,  $\text{CDCl}_3$ ):  $\delta$  157.9, 152.1, 148.5, 143.7, 139.8, 132.0, 130.6 (q,  $J$  = 258.3 Hz), 129.6, 129.1, 128.7, 128.3, 127.9, 126.9, 125.6, 125.3, 120.0, 23.6, 16.1; *minor isomer*:  $^1\text{H}$  NMR (600 MHz,  $\text{CDCl}_3$ ):  $\delta$  7.74–7.63 (m, 5H), 7.42–7.40 (m, 3H), 7.37–7.34 (m, 2H), 7.28–7.27 (m, 1H), 7.15–7.13 (m, 1H), 2.63 (s, 3H), 2.17 (s, 3H);  $^{13}\text{C}$  NMR (150 MHz,  $\text{CDCl}_3$ ):  $\delta$  157.8, 151.1, 150.1, 143.7, 139.8, 132.0, 129.9, 129.4, 129.0 (q,  $J$  = 263.4 Hz), 128.4, 128.1, 127.8, 126.9, 125.5, 125.3, 121.0, 23.6, 16.2;  $^{19}\text{F}$  NMR (100 MHz,  $\text{CDCl}_3$ ):  $\delta$  -62.5; IR (thin film) 3051, 2926, 2859, 1613, 1584, 1453, 1324, 1122, 969, 699  $\text{cm}^{-1}$ ; HRMS (ESI)  $m/z$  calcd for  $\text{C}_{22}\text{H}_{19}\text{F}_3\text{N}$  ( $\text{M}+\text{H}$ ) $^+$

354.1464, found 354.1458.

#### 4. Synthesis of 3,5-disubstituted isoxazolines **3**

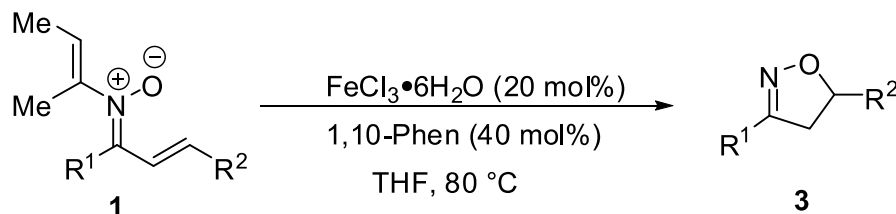

**General procedure B:** A Teflon-sealed flask was charged with *N*-vinyl nitron **1** (0.2 mmol), FeCl<sub>3</sub>·6H<sub>2</sub>O (11 mg, 20 mol%), 1,10-Phen (15 mg, 40 mol%) under N<sub>2</sub> atmosphere. THF (2 mL) was then added via syringe and the reaction vessel was once again sealed with a Teflon cap. The reaction mixture was stirred at 25 °C for 5 min and then heated at 80 °C for 7–15 h until nitron **1** was consumed completely (monitored by TLC). At this time, the solvent was removed under reduced pressure and the crude product was purified by flash column chromatography (the crude residue was dry loaded on silica gel, 1/50 to 1/20, ethyl acetate/petroleum ether) to afford 3,5-disubstituted isoxazolines **3**.

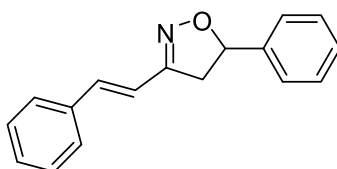

**3a**

**(*E*)-5-Phenyl-3-styryl-4,5-dihydroisoxazole (3a)**<sup>[4]</sup>, light yellow solid, 0.040 g, 79% yield. Mp: 83–84 °C; <sup>1</sup>H NMR (400 MHz, CDCl<sub>3</sub>): δ 7.35–7.33 (m, 2H), 7.26–7.19 (m, 8H), 7.03 (d, *J* = 16.4 Hz, 1H), 6.63 (d, *J* = 16.4 Hz, 1H), 5.57 (dd, *J* = 10.4 Hz, 8.4 Hz, 1H), 3.52 (dd, *J* = 16.4 Hz, 7.2 Hz, 1H), 3.09 (dd, *J* = 16.4 Hz, 8.4 Hz, 1H); <sup>13</sup>C NMR (100 MHz, CDCl<sub>3</sub>): δ 157.2, 140.7, 136.5, 135.6, 128.9, 128.7, 128.6, 128.1, 126.9, 125.7, 117.7, 82.5, 41.5; HRMS (ESI) *m/z* calcd for C<sub>17</sub>H<sub>16</sub>NO (M+H)<sup>+</sup> 250.1226, found 250.1217.

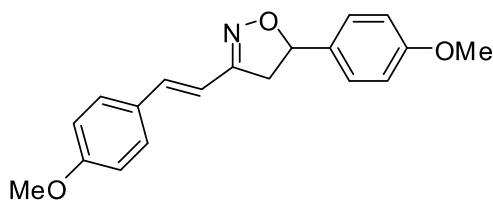

**3b**

**(E)-5-(4-Methoxyphenyl)-3-(4-methoxystyryl)-4,5-dihydroisoxazole (3b)**, light yellow solid, 0.031 g, 51% yield. Mp: 135–136 °C;  $^1\text{H}$  NMR (400 MHz,  $\text{CDCl}_3$ ):  $\delta$  7.42 (d,  $J$  = 8.8 Hz, 2H), 7.32–7.28 (m, 2H), 7.01 (d,  $J$  = 16.4 Hz, 1H), 6.92–6.89 (m, 4H), 6.70 (d,  $J$  = 16.4 Hz, 1H), 5.63 (dd,  $J$  = 10.8 Hz, 8.8 Hz, 1H), 3.83 (s, 3H), 3.81 (s, 3H); 3.60 (dd,  $J$  = 16.4 Hz, 10.8 Hz, 1H), 3.20 (dd,  $J$  = 16.4 Hz, 8.4 Hz, 1H);  $^{13}\text{C}$  NMR (100 MHz,  $\text{CDCl}_3$ ):  $\delta$  160.3, 159.6, 157.6, 136.1, 132.7, 128.5, 128.3, 127.3, 115.8, 114.3, 114.1, 82.4, 55.3, 55.2, 41.5; IR (thin film) 2959, 2840, 1604, 1510, 1463, 1244, 1175, 1027, 908, 817  $\text{cm}^{-1}$ ; HRMS (ESI)  $m/z$  calcd for  $\text{C}_{19}\text{H}_{20}\text{NO}_3$  ( $\text{M}+\text{H}$ ) $^+$  310.1438, found 310.1423.

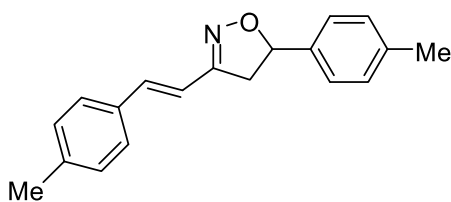

**3c**

**(E)-3-(4-Methylstyryl)-5-p-tolyl-4,5-dihydroisoxazole (3c)**, light yellow solid, 0.040 g, 72% yield. Mp: 127–128 °C;  $^1\text{H}$  NMR (400 MHz,  $\text{CDCl}_3$ ):  $\delta$  7.36 (d,  $J$  = 8.0 Hz, 2H), 7.27 (d,  $J$  = 8.0 Hz, 2H), 7.19–7.16 (m, 4H), 7.09 (d,  $J$  = 16.4 Hz, 1H), 6.71 (d,  $J$  = 16.4 Hz, 1H), 5.66 (dd,  $J$  = 10.4 Hz, 8.0 Hz, 1H), 3.62 (dd,  $J$  = 16.4 Hz, 10.8 Hz, 1H), 3.20 (dd,  $J$  = 16.4 Hz, 8.4 Hz, 1H), 2.36 (s, 3H), 2.35 (s, 3H);  $^{13}\text{C}$  NMR (100 MHz,  $\text{CDCl}_3$ ):  $\delta$  157.4, 139.1, 138.0, 137.8, 136.5, 133.0, 129.6, 129.4, 126.9, 125.9, 117.0, 82.6, 41.6, 21.3, 21.1; IR (thin film) 3031, 2922, 2857, 1608, 1511, 1451, 1368, 1111, 964, 811  $\text{cm}^{-1}$ ; HRMS (ESI)  $m/z$  calcd for  $\text{C}_{19}\text{H}_{20}\text{NO}$  ( $\text{M}+\text{H}$ ) $^+$  278.1539, found 278.1518.

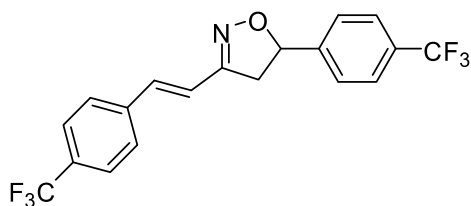

**3d**

**(E)-5-(4-(Trifluoromethyl)phenyl)-3-(4-(trifluoromethyl)styryl)-4,5-dihydroisoxazole (3d)**, light yellow solid, 0.051 g, 66% yield. Mp: 113–114 °C;  $^1\text{H}$  NMR (400 MHz,  $\text{CDCl}_3$ ):  $\delta$  7.66–7.61 (m, 4H), 7.56 (d,  $J = 8.0$  Hz, 2H), 7.50 (d,  $J = 8.4$  Hz, 2H), 7.22 (d,  $J = 16.4$  Hz, 1H), 6.77 (d,  $J = 16.8$  Hz, 1H), 5.80 (dd,  $J = 11.2$  Hz, 7.6 Hz, 1H), 3.74 (dd,  $J = 16.4$  Hz, 11.2 Hz, 1H), 3.21 (dd,  $J = 16.4$  Hz, 7.6 Hz, 1H);  $^{13}\text{C}$  NMR (100 MHz,  $\text{CDCl}_3$ ):  $\delta$  156.7, 144.7, 138.9, 135.2, 131.2 (q,  $J = 97.7$  Hz), 130.8 (q,  $J = 32.1$  Hz), 128.4 (q,  $J = 37.2$  Hz), 127.1, 126.0, 125.9 (q,  $J = 10.9$  Hz), 125.8, 125.3 (q,  $J = 270.5$  Hz), 120.0, 81.9, 41.7;  $^{19}\text{F}$  NMR (100 MHz,  $\text{CDCl}_3$ ):  $\delta$  –62.6, –62.7; IR (thin film) 3081, 2938, 1618, 1419, 1327, 1126, 1066, 910, 834, 736  $\text{cm}^{-1}$ ; HRMS (ESI)  $m/z$  calcd for  $\text{C}_{19}\text{H}_{14}\text{F}_6\text{NO}$  ( $\text{M}+\text{H}$ ) $^+$  386.0974, found 386.0956.

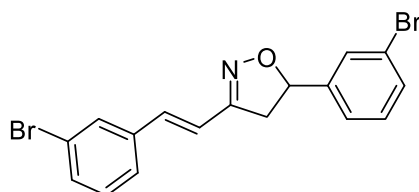

**3t**

**(E)-5-(3-Bromophenyl)-3-(3-bromostyryl)-4,5-dihydroisoxazole (3t)**, light yellow solid, 0.064 g, 76% yield. Mp: 94–95 °C;  $^1\text{H}$  NMR (400 MHz,  $\text{CDCl}_3$ ):  $\delta$  7.59 (s, 1H), 7.52 (s, 1H), 7.46–7.43 (m, 2H), 7.39 (d,  $J = 8.0$  Hz, 1H), 7.30–7.21 (m, 3H), 7.12 (d,  $J = 16.4$  Hz, 1H), 6.66 (d,  $J = 16.4$  Hz, 1H), 5.68 (dd,  $J = 11.2$  Hz, 8.0 Hz, 1H), 3.66 (dd,  $J = 16.4$  Hz, 11.2 Hz, 1H), 3.18 (dd,  $J = 16.4$  Hz, 8.0 Hz, 1H);  $^{13}\text{C}$  NMR (100 MHz,  $\text{CDCl}_3$ ):  $\delta$  156.7, 143.0, 137.7, 135.2, 131.9, 131.4, 130.4, 130.3, 129.9, 128.8, 125.4, 124.3, 123.0, 122.9, 119.0, 81.8, 41.6; IR (thin film) 2926, 1650, 1460, 1373, 1167, 973, 901, 786, 693  $\text{cm}^{-1}$ ; HRMS (ESI)  $m/z$  calcd for  $\text{C}_{17}\text{H}_{14}\text{Br}_2\text{NO}$  ( $\text{M}+\text{H}$ ) $^+$  405.9437, found 405.9433.

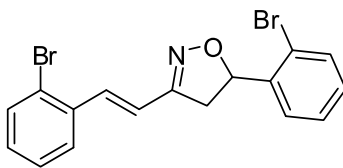

**3f**

**(E)-5-(2-Bromophenyl)-3-(2-bromostyryl)-4,5-dihydroisoxazole (3f)**, light yellow solid, 0.067 g, 80% yield. Mp: 102–103 °C;  $^1\text{H}$  NMR (600 MHz,  $\text{CDCl}_3$ ):  $\delta$  7.61–7.56 (m, 3H), 7.53 (dd,  $J$  = 7.2 Hz, 1.2 Hz, 1H), 7.20–7.14 (m, 2H), 7.10 ( $J$  = 16.8 Hz, 1H), 7.06 (d,  $J$  = 16.2 Hz, 1H), 5.99 (dd,  $J$  = 11.4 Hz, 7.2 Hz, 1H), 3.87 (dd,  $J$  = 16.2 Hz, 10.8 Hz, 1H), 3.11 (dd,  $J$  = 16.8 Hz, 7.2 Hz, 1H);  $^{13}\text{C}$  NMR (150 MHz,  $\text{CDCl}_3$ ):  $\delta$  157.0, 140.3, 135.3, 135.2, 133.2, 132.7, 130.1, 129.4, 127.8, 127.7, 126.9, 126.7, 124.3, 120.9, 120.1, 81.8, 41.3; IR (thin film) 3050, 2954, 2863, 1655, 1620, 1465, 1434, 954, 896, 749  $\text{cm}^{-1}$ ; HRMS (ESI)  $m/z$  calcd for  $\text{C}_{17}\text{H}_{14}\text{Br}_2\text{NO}$  ( $\text{M}+\text{H}$ ) $^+$  405.9437, found 405.9424.

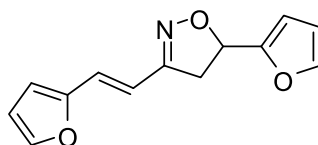

**3g**

**(E)-5-(Furan-2-yl)-3-(2-(furan-2-yl)vinyl)-4,5-dihydroisoxazole (3g)**, light yellow solid, 0.035 g, 76% yield. Mp: 92–93 °C;  $^1\text{H}$  NMR (400 MHz,  $\text{CDCl}_3$ ):  $\delta$  7.45–7.42 (m, 2H), 7.01 (d,  $J$  = 16.4 Hz, 1H), 6.59 (d,  $J$  = 16.0 Hz, 1H), 6.46–6.43 (m, 2H), 6.41–6.40 (m, 1H), 6.37–6.35 (m, 1H), 5.66–5.61 (m, 1H), 3.42–3.40 (m, 2H);  $^{13}\text{C}$  NMR (100 MHz,  $\text{CDCl}_3$ ):  $\delta$  157.0, 151.8, 151.6, 143.6, 143.2, 123.7, 115.9, 111.9, 111.2, 110.5, 108.8, 75.7, 37.3; IR (thin film) 3123, 2924, 2856, 1629, 1546, 1499, 1364, 1016, 906, 751  $\text{cm}^{-1}$ ; HRMS (ESI)  $m/z$  calcd for  $\text{C}_{13}\text{H}_{12}\text{NO}_3$  ( $\text{M}+\text{H}$ ) $^+$  230.0812, found 230.0802.

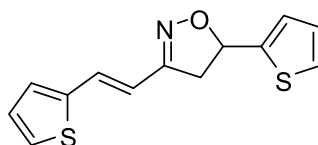

**3h**

**(E)-5-(Thiophen-2-yl)-3-(2-(thiophen-2-yl)vinyl)-4,5-dihydroisoxazole (3h)**, light



yellow solid, 0.041 g, 78% yield. Mp: 84–85 °C;  $^1\text{H}$  NMR (400 MHz,  $\text{CDCl}_3$ ):  $\delta$  7.31–7.29 (m, 2H), 7.13–7.12 (m, 1H), 7.10 (d,  $J = 3.6$  Hz, 1H), 7.03–6.98 (m, 2H), 6.95 (d,  $J = 16.4$  Hz, 1H), 6.91 (d,  $J = 16.0$  Hz, 1H) 5.91 (dd,  $J = 10.8$  Hz, 8.4 Hz, 1H), 3.61 (dd,  $J = 16.4$  Hz, 10.8 Hz, 1H), 3.32 (dd,  $J = 16.0$  Hz, 8.0 Hz, 1H);  $^{13}\text{C}$  NMR (100 MHz,  $\text{CDCl}_3$ ):  $\delta$  157.1, 143.1, 140.9, 129.4, 128.0, 127.9, 126.9, 126.6, 125.8, 125.5, 116.9, 78.4, 41.4; IR (thin film) 2924, 1663, 1589, 1547, 1492, 1451, 1008, 829, 771, 702  $\text{cm}^{-1}$ ; HRMS (ESI)  $m/z$  calcd for  $\text{C}_{13}\text{H}_{12}\text{NOS}_2$  ( $\text{M}+\text{H}$ ) $^+$  262.0355, found 262.0350.

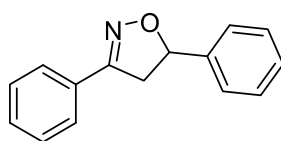

**3i**

**3,5-Diphenyl-4,5-dihydroisoxazole (3i)**<sup>[4]</sup>, light yellow solid, 0.044 g, 98% yield. Mp: 62–63 °C;  $^1\text{H}$  NMR (500 MHz,  $\text{CDCl}_3$ ):  $\delta$  7.75–7.65 (m, 2H), 7.42–7.41 (m, 7H), 7.34–7.33 (m, 1H), 5.77 (dd,  $J = 10.5$  Hz, 8.5 Hz, 1H), 3.82 (dd,  $J = 16.5$  Hz, 11.0 Hz, 1H), 3.38 (dd,  $J = 16.5$  Hz, 8.0 Hz, 1H);  $^{13}\text{C}$  NMR (125 MHz,  $\text{CDCl}_3$ ):  $\delta$  156.1, 140.9, 130.1, 129.4, 128.7, 128.7, 128.2, 126.7, 125.8, 82.5, 43.1.

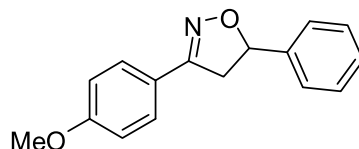

**3j**

**3-(4-Methoxyphenyl)-5-phenyl-4,5-dihydroisoxazole (3j)**<sup>[5]</sup>, light yellow solid, 0.041 g, 81% yield. Mp: 93–94 °C;  $^1\text{H}$  NMR (400 MHz,  $\text{CDCl}_3$ ):  $\delta$  7.65–7.63 (m, 2H), 7.42–7.32 (m, 5H), 6.94–6.91 (m, 2H), 5.73 (dd,  $J = 10.8$  Hz, 8.4 Hz, 1H), 3.84 (s, 3H), 3.79 (dd,  $J = 10.8$  Hz, 8.4 Hz, 1H), 3.35 (dd,  $J = 16.4$  Hz, 8.0 Hz, 1H);  $^{13}\text{C}$  NMR (100 MHz,  $\text{CDCl}_3$ ):  $\delta$  161.0, 155.6, 141.0, 128.7, 128.2, 128.1, 125.8, 122.0, 114.1, 82.2, 55.3, 43.4.

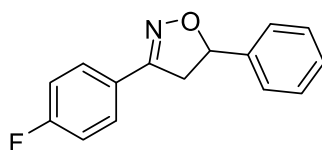

**3u**

**3-(4-Fluorophenyl)-5-phenyl-4,5-dihydroisoxazole (3u)**<sup>[5]</sup>, light yellow solid, 0.035 g, 72% yield. Mp: 83–84 °C; <sup>1</sup>H NMR (400 MHz, CDCl<sub>3</sub>):  $\delta$  7.71–7.67 (m, 2H), 7.41–7.33 (m, 5H), 7.12–7.08 (m, 2H), 5.77 (dd,  $J$  = 10.8 Hz, 8.4 Hz, 1H), 3.79 (dd,  $J$  = 11.2 Hz, 8.8 Hz, 1H), 3.35 (dd,  $J$  = 16.4 Hz, 8.4 Hz, 1H); <sup>13</sup>C NMR (100 MHz, CDCl<sub>3</sub>):  $\delta$  164.9 (d,  $J$  = 249.3 Hz), 155 (d,  $J$  = 15.0 Hz), 140.7, 128.7, 128.7, 128.6, 125.8, 125.7 (d,  $J$  = 37.0 Hz), 115.9 (d,  $J$  = 21.9 Hz), 82.6, 43.1; <sup>19</sup>F NMR (100 MHz, CDCl<sub>3</sub>):  $\delta$  –109.8.

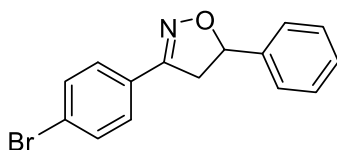

**3k**

**3-(4-Bromophenyl)-5-phenyl-4,5-dihydroisoxazole (3k)**<sup>[6]</sup>, light yellow solid, 0.049 g, 82% yield. Mp: 131–132 °C; <sup>1</sup>H NMR (400 MHz, CDCl<sub>3</sub>):  $\delta$  7.57–7.52 (m, 4H), 7.39–7.33 (m, 5H), 5.78 (dd,  $J$  = 11.2 Hz, 8.4 Hz, 1H), 3.79 (dd,  $J$  = 16.8 Hz, 10.8 Hz, 1H), 3.35 (dd,  $J$  = 16.8 Hz, 8.4 Hz, 1H); <sup>13</sup>C NMR (100 MHz, CDCl<sub>3</sub>):  $\delta$  155.3, 140.6, 131.9, 128.8, 128.4, 128.3, 128.1, 125.8, 124.4, 82.8, 42.9.

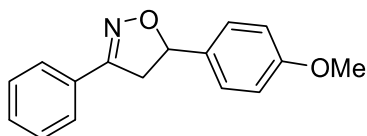

**3l**

**5-(4-Methoxyphenyl)-3-phenyl-4,5-dihydroisoxazole (3l)**<sup>[5]</sup>, light yellow solid, 0.034 g, 68% yield. Mp: 96–97 °C; <sup>1</sup>H NMR (600 MHz, CDCl<sub>3</sub>):  $\delta$  7.71–7.70 (m, 2H), 7.43–7.41 (m, 3H), 7.33 (d,  $J$  = 8.4 Hz, 2H), 6.92 (d,  $J$  = 9.0 Hz, 2H), 5.71 (dd,  $J$  = 11.4 Hz, 9.0 Hz, 1H), 3.81 (s, 3H), 3.75 (dd,  $J$  = 16.8 Hz, 10.8 Hz, 1H), 3.35 (dd,  $J$  = 16.2 Hz, 8.4 Hz, 1H); <sup>13</sup>C NMR (150 MHz, CDCl<sub>3</sub>):  $\delta$  159.6, 156.2, 132.7, 130.0, 129.5, 128.7, 127.3, 126.7, 114.1, 82.5, 55.3, 42.8.

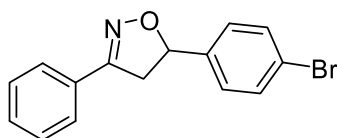

**3m**

**5-(4-Bromophenyl)-3-phenyl-4,5-dihydroisoxazole (3m)**<sup>[6]</sup>, light yellow solid, 0.045 g, 75% yield. Mp: 114–115 °C; <sup>1</sup>H NMR (400 MHz, CDCl<sub>3</sub>):  $\delta$  7.68–7.66 (m, 2H), 7.50 (d,  $J$  = 8.4 Hz, 2H), 7.44–7.40 (m, 3H), 7.27 (d,  $J$  = 8.4 Hz, 2H), 5.71 (dd,  $J$  = 10.8 Hz, 8.0 Hz, 1H), 3.81 (dd,  $J$  = 16.4 Hz, 10.8 Hz, 1H), 3.31 (dd,  $J$  = 16.4 Hz, 8.4 Hz, 1H); <sup>13</sup>C NMR (100 MHz, CDCl<sub>3</sub>):  $\delta$  156.0, 140.0, 131.8, 130.2, 129.2, 128.7, 127.5, 126.7, 122.1, 81.7, 43.1.

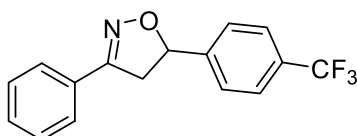

**3n**

**3-Phenyl-5-(4-(trifluoromethyl)phenyl)-4,5-dihydroisoxazole (3n)**<sup>[6]</sup>, light yellow solid, 0.048 g, 83% yield. Mp: 137–138 °C; <sup>1</sup>H NMR (400 MHz, CDCl<sub>3</sub>):  $\delta$  7.70–7.68 (m, 2H), 7.65–7.63 (m, 2H), 7.53–7.51 (m, 2H), 7.44–7.40 (m, 3H), 5.83 (dd,  $J$  = 11.2 Hz, 8.0 Hz, 1H), 3.88 (dd,  $J$  = 16.8 Hz, 11.2 Hz, 1H), 3.35 (dd,  $J$  = 16.4 Hz, 7.6 Hz, 1H); <sup>13</sup>C NMR (100 MHz, CDCl<sub>3</sub>):  $\delta$  156.0, 145.0, 130.8 (q,  $J$  = 32.1 Hz), 130.3, 129.0, 128.8, 126.8, 126.1, 125.8 (q,  $J$  = 6.5 Hz), 125.3 (q,  $J$  = 270.5 Hz), 81.6, 43.3; <sup>19</sup>F NMR (100 MHz, CDCl<sub>3</sub>):  $\delta$  –62.6.

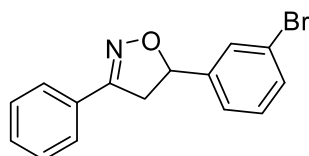

**3p**

**5-(3-Bromophenyl)-3-phenyl-4,5-dihydroisoxazole (3p)**<sup>[7]</sup>, light yellow solid, 0.047 g, 78% yield. Mp: 83–84 °C; <sup>1</sup>H NMR (400 MHz, CDCl<sub>3</sub>):  $\delta$  7.62–7.60 (m, 2H), 7.47 (s, 1H), 7.38–7.33 (m, 4H), 7.25 (d,  $J$  = 7.6 Hz, 1H), 7.19–7.15 (m, 1H), 5.65 (dd,  $J$  = 10.4 Hz, 8.0 Hz, 1H), 3.76 (dd,  $J$  = 16.8 Hz, 11.2 Hz, 1H), 3.27 (dd,  $J$  = 16.4 Hz, 7.6 Hz, 1H); <sup>13</sup>C NMR (100 MHz, CDCl<sub>3</sub>):  $\delta$  156.0, 143.3, 131.3, 130.4, 130.3, 129.2, 128.9, 128.8, 126.8, 124.4, 122.8, 81.6, 43.3.

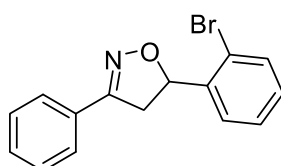

### 3q

**5-(2-Bromophenyl)-3-phenyl-4,5-dihydroisoxazole (3q)**<sup>[6]</sup>, light yellow solid, 0.052 g, 86% yield. Mp: 69–70 °C; <sup>1</sup>H NMR (400 MHz, CDCl<sub>3</sub>):  $\delta$  7.69–7.68 (m, 2H), 7.58–7.57 (m, 2H), 7.41–7.40 (m, 3H), 7.35–7.32 (m, 1H), 7.19–7.16 (m, 1H), 6.01 (dd,  $J$  = 11.2 Hz, 6.8 Hz, 1H), 3.99 (dd,  $J$  = 16.8 Hz, 11.2 Hz, 1H), 3.22 (dd,  $J$  = 16.8 Hz, 6.8 Hz, 1H); <sup>13</sup>C NMR (100 MHz, CDCl<sub>3</sub>):  $\delta$  156.0, 140.6, 132.7, 130.2, 129.3, 129.2, 128.7, 127.8, 126.8, 126.7, 120.8, 81.4, 42.9.

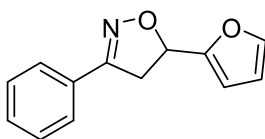

### 3r

**5-(Furan-2-yl)-3-phenyl-4,5-dihydroisoxazole (3r)**<sup>[7]</sup>, light yellow solid, 0.035 g, 82% yield. Mp: 70–71 °C; <sup>1</sup>H NMR (400 MHz, CDCl<sub>3</sub>):  $\delta$  7.72–7.70 (m, 2H), 7.46–7.36 (m, 4H), 6.43–6.37 (m, 2H), 5.77–5.69 (m, 1H), 3.63–3.61 (m, 2H); <sup>13</sup>C NMR (100 MHz, CDCl<sub>3</sub>):  $\delta$  156.2, 151.7, 143.1, 130.1, 129.3, 128.7, 126.7, 110.5, 108.7, 75.6, 38.8.

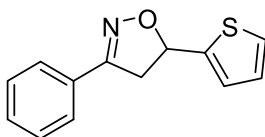

### 3s

**3-Phenyl-5-(thiophen-2-yl)-4,5-dihydroisoxazole (3s)**<sup>[7]</sup>, light yellow solid, 0.039 g, 86% yield. Mp: 56–57 °C; <sup>1</sup>H NMR (400 MHz, CDCl<sub>3</sub>):  $\delta$  7.73–7.70 (m, 2H), 7.43–7.42 (m, 3H), 7.31–7.29 (m, 1H), 7.12–7.11 (m, 1H), 7.01–6.99 (m, 1H), 5.98 (dd,  $J$  = 10.8 Hz, 8.0 Hz, 1H), 3.79 (dd,  $J$  = 15.6 Hz, 10.4 Hz, 1H), 3.51 (dd,  $J$  = 17.2 Hz, 8.4 Hz, 1H); <sup>13</sup>C NMR (100 MHz, CDCl<sub>3</sub>):  $\delta$  156.3, 143.3, 130.2, 129.2, 128.7, 126.9, 126.7, 125.7, 125.4, 78.3, 42.9.

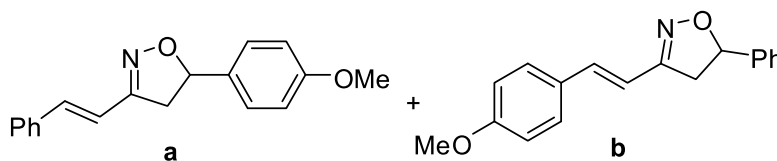

### 3v (a/b = 1:1)

**Isoxazoline (3v, a/b = 1:1)**, light yellow solid, 0.039 g, 69% yield. Mp: 110–111 °C;

one isomer:  $^1\text{H}$  NMR (400 MHz,  $\text{CDCl}_3$ ):  $\delta$  7.46 (s, 1H), 7.42–7.37 (m, 6H), 7.16 (d,  $J = 16.4$  Hz, 1H), 6.93–6.91 (m, 2H), 6.76 (d,  $J = 16.4$  Hz, 1H), 5.64–5.61 (m, 1H), 3.81 (s, 3H), 3.59–3.55 (m, 1H), 3.22–3.20 (m, 1H);  $^{13}\text{C}$  NMR (100 MHz,  $\text{CDCl}_3$ ):  $\delta$  160.3, 157.4, 136.4, 135.7, 128.8, 128.7, 128.3, 127.3, 125.8, 117.9, 114.1, 82.5, 55.3, 41.3; another isomer:  $^1\text{H}$  NMR (400 MHz,  $\text{CDCl}_3$ ):  $\delta$  7.48 (s, 1H), 7.35–7.29 (m, 6H), 7.02 (d,  $J = 16.4$  Hz, 1H), 6.90–6.89 (m, 2H), 6.71 (d,  $J = 16.4$  Hz, 1H), 5.69–5.66 (m, 1H), 3.83 (s, 3H), 3.65–3.61 (m, 1H), 3.18–3.15 (m, 1H);  $^{13}\text{C}$  NMR (100 MHz,  $\text{CDCl}_3$ ):  $\delta$  159.6, 140.9, 136.2, 132.6, 128.9, 128.5, 128.1, 126.9, 125.8, 115.6, 114.3, 82.4, 55.3, 41.7; IR (thin film) 2925, 1649, 1604, 1512, 1456, 1251, 1175, 911, 824,  $755\text{ cm}^{-1}$ ; HRMS (ESI)  $m/z$  calcd for  $\text{C}_{18}\text{H}_{18}\text{NO}_2$  ( $\text{M}+\text{H}$ ) $^+$  280.1338, found 280.1330.

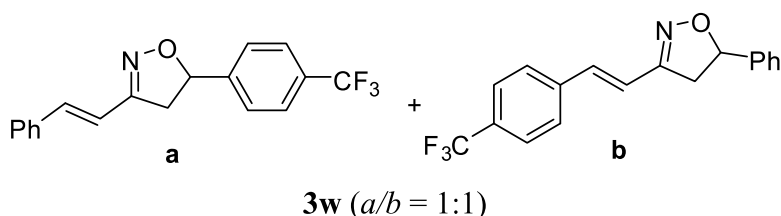

**Isoxazoline (3w,  $a/b = 1:1$ )**, light yellow solid, 0.038 g, 60% yield. Mp: 114–115 °C; one isomer:  $^1\text{H}$  NMR (400 MHz,  $\text{CDCl}_3$ ):  $\delta$  7.64–7.60 (m, 4H), 7.37–7.37 (m, 2H), 7.34–7.31 (m, 3H), 7.22 (d,  $J = 16.4$  Hz, 1H), 6.71(s, 1H), 5.76–5.73 (m, 1H), 3.66–3.60 (m, 1H), 3.23–3.19 (m, 1H);  $^{13}\text{C}$  NMR (100 MHz,  $\text{CDCl}_3$ ):  $\delta$  157.1, 144.9, 139.1, 139.1, 134.7, 130.6 (q,  $J = 32.1$  Hz), 129.1, 128.9, 126.9, 126.0, 125.7, 125.3 (q,  $J = 269.8$  Hz), 120.4, 82.9, 41.9; another isomer:  $^1\text{H}$  NMR (400 MHz,  $\text{CDCl}_3$ ):  $\delta$  7.55–7.50 (m, 4H), 7.48–7.44 (m, 3H), 7.37–7.37 (m, 2H), 7.13 (d,  $J = 16.4$  Hz, 1H), 6.75 (s, 1H), 5.71–5.69 (m, 1H), 3.72–3.67 (m, 1H), 3.18–3.14 (m, 1H);  $^{13}\text{C}$  NMR (100 MHz,  $\text{CDCl}_3$ ):  $\delta$  156.9, 140.5, 137.1, 135.5, 130.6 (q,  $J = 32.1$  Hz), 128.8, 128.3, 127.0, 125.8, 125.7, 125.3 (q,  $J = 269.8$  Hz), 117.4, 81.6, 41.4;  $^{19}\text{F}$  NMR (100 MHz,  $\text{CDCl}_3$ ):  $\delta$  –62.5, –62.6; IR (thin film) 2926, 1615, 1421, 1330, 1109, 1070, 962, 902,  $696\text{ cm}^{-1}$ ; HRMS (ESI)  $m/z$  calcd for  $\text{C}_{18}\text{H}_{15}\text{F}_3\text{NO}$  ( $\text{M}+\text{H}$ ) $^+$  318.1106, found 318.1095.

## 5. Synthesis of *N*-vinyl nitrones 1.

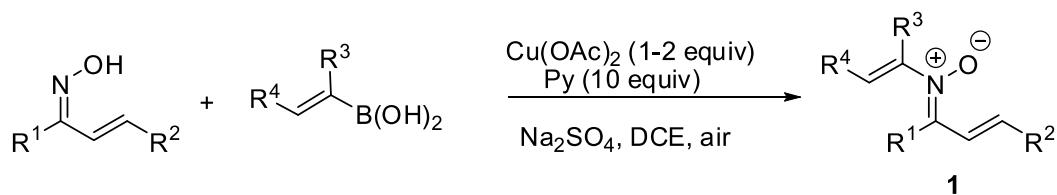

**General procedure C:** A scintillation vial was charged with oxime (0.3 mmol, 1.0 equiv), alkenyl boronic acid (0.9 mmol, 3 equiv), Cu(OAc)<sub>2</sub> (2 equiv), and anhydrous Na<sub>2</sub>SO<sub>4</sub> (8.0 equiv). These solids were diluted with DCE to form a 0.1 M solution of oxime. Pyridine (10.0 equiv) was added to the resulting slurry via syringe. The scintillation vial was then capped with a septum pierced with a ventilation needle and the reaction mixture was stirred at 25 °C for 12 h. DCE and pyridine were removed under reduced pressure and the crude reaction mixture was purified by medium pressure chromatography (2:1; ethyl acetate:hexanes) to give nitron **1**.

N-vinyl nitrones **1a-j**, **1l**, **1n**, **1o**, **1t**, **1ab-ag**, **1ak** were prepared according to literature methods,<sup>[8]</sup> and their spectral data matched literature values.

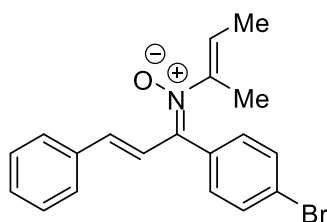

**1k** (*E/Z* = 8:1)

**(2*E*,*NE*)-*N*-((*E*)-1-(4-Bromophenyl)-3-phenylallylidene)but-2-en-2-amine oxide** (**1k**, *E/Z* = 8:1), yellow solid, 0.049 g, 46% yield. Mp: 119–120 °C; <sup>1</sup>H NMR (400 MHz, CDCl<sub>3</sub>): δ 8.01 (d, *J* = 16.4 Hz, 1H), 7.58–7.56 (m, 2H), 7.48–7.46 (m, 2H), 7.32–7.28 (m, 2H), 7.14–7.12 (m, 2H), 6.54 (d, *J* = 16.4 Hz, 1H), 5.44–5.42 (m, 1H), 1.92 (s, 3H), 1.47 (d, *J* = 6.4 Hz, 3H); <sup>13</sup>C NMR (100MHz, CDCl<sub>3</sub>): δ 147.7, 141.8, 138.4, 135.1, 133.0, 131.6, 129.5, 128.9, 128.6, 128.3, 123.5, 122.8, 122.2, 14.9, 12.2; IR (thin film) 3059, 2925, 2857, 1664, 1486, 1221, 1071, 970, 813, 699 cm<sup>-1</sup>; HRMS (ESI) *m/z* calcd for C<sub>19</sub>H<sub>19</sub>BrNO (*M*+H)<sup>+</sup> 356.0645, found 356.0644.

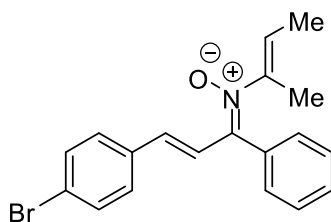

**1m** (*E/Z* = 8:1)

**(2*E,NE*)-*N*-((*E*)-3-(4-Bromophenyl)-1-phenylallylidene)but-2-en-2-amine oxide** (**1m**, *E/Z* = 8:1), yellow liquid. 0.064 g, 61% yield.  $^1\text{H}$  NMR (400 MHz,  $\text{CDCl}_3$ ):  $\delta$  7.94 (d,  $J$  = 16.0 Hz, 1H), 7.40–7.33 (m, 4H), 7.23–7.18 (m, 4H), 6.41 (d,  $J$  = 16.4 Hz, 1H), 5.34–5.34 (m, 1H), 1.83 (s, 3H), 1.33 (s, 3H);  $^{13}\text{C}$  NMR (100MHz,  $\text{CDCl}_3$ ):  $\delta$  147.7, 141.8, 138.4, 135.1, 132.9, 131.6, 129.5, 128.9, 128.7, 128.3, 123.6, 122.8, 122.2, 55.0, 14.9, 12.2; IR (thin film) 3039, 2923, 1664, 1551, 1466, 1223, 1068, 967, 773  $\text{cm}^{-1}$ ; HRMS (ESI)  $m/z$  calcd for  $\text{C}_{19}\text{H}_{19}\text{BrNO}$  ( $\text{M}+\text{H}$ ) $^+$  356.0645, found 356.0639.

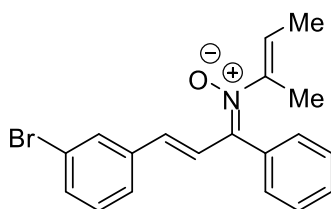

**1p** (*E/Z* = 8:1)

**(2*E,NE*)-*N*-((*E*)-3-(3-Bromophenyl)-1-phenylallylidene)but-2-en-2-amine oxide** (**1p**, *E/Z* = 8:1), yellow solid, 0.056 g, 53% yield. Mp: 123–124 °C;  $^1\text{H}$  NMR (400 MHz,  $\text{CDCl}_3$ ):  $\delta$  7.94 (d,  $J$  = 17.2 Hz, 1H), 7.50–7.44 (m, 1H), 7.42–7.22 (m, 5H), 7.14–7.02 (m, 2H), 6.40 (d,  $J$  = 16.8 Hz, 1H), 5.33–5.30 (m, 1H), 1.83 (s, 3H), 1.34 (d,  $J$  = 6.0 Hz, 3H);  $^{13}\text{C}$  NMR (100MHz,  $\text{CDCl}_3$ ):  $\delta$  147.6, 141.8, 138.3, 138.1, 132.9, 131.6, 130.2, 130.0, 129.5, 129.0, 128.4, 125.6, 123.7, 122.9, 122.7, 15.0, 12.2; IR (thin film) 3039, 2923, 1664, 1551, 1466, 1223, 1068, 967, 773  $\text{cm}^{-1}$ ; HRMS (ESI)  $m/z$  calcd for  $\text{C}_{19}\text{H}_{19}\text{BrNO}$  ( $\text{M}+\text{H}$ ) $^+$  356.0645, found 356.0639.

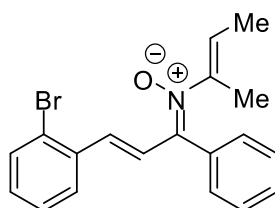

**1q** (*E/Z* = 8:1)

**(2*E*,*NE*)-*N*-((*E*)-3-(2-Bromophenyl)-1-Phenylallylidene)but-2-en-2-amine oxide** (**1q**, *E/Z* = 8:1), yellow liquid. 0.053 g, 50% yield. <sup>1</sup>H NMR (400 MHz, CDCl<sub>3</sub>): δ 7.89 (d, *J* = 16.4 Hz, 1H), 7.73–7.71 (m, 1H), 7.47–7.32 (m, 4H), 7.19–7.18 (m, 2H), 7.03–7.01 (m, 1H), 6.90 (d, *J* = 16.4 Hz, 1H), 5.37–5.36 (m, 1H), 1.84 (s, 3H), 1.35 (d, *J* = 6.0 Hz, 3H); <sup>13</sup>C NMR (100MHz, CDCl<sub>3</sub>): δ 147.9, 141.9, 138.5, 135.9, 132.9, 132.8, 129.9, 129.5, 128.9, 128.3, 127.5, 127.2, 124.6, 123.9, 123.7, 14.9, 12.2; IR (thin film) 3059, 2923, 2858, 1665, 1502, 1462, 1228, 1022, 970, 754 cm<sup>-1</sup>; HRMS (ESI) *m/z* calcd for C<sub>19</sub>H<sub>19</sub>BrNO (M+H)<sup>+</sup> 356.0645, found 356.0643.

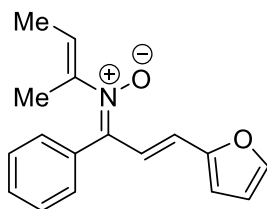

**1r** (*E/Z* = 5:1)

**(2*E*,*NZ*)-*N*-((*E*)-3-(Furan-2-yl)-1-phenylallylidene)but-2-en-2-amine oxide** (**1r**, *E/Z* = 5:1), light yellow solid, 0.043 g, 54% yield. Mp: 120–121 °C; <sup>1</sup>H NMR (400 MHz, CDCl<sub>3</sub>): δ 7.80 (d, *J* = 16.0 Hz, 1H), 7.42–7.35 (m, 4H), 7.17–7.16 (m, 2H), 6.36–6.35 (m, 3H), 5.36–5.34 (m, 1H), 1.85 (s, 3H), 1.36 (s, 3H); <sup>13</sup>C NMR (100 MHz, CDCl<sub>3</sub>): δ 152.7, 147.6, 143.7, 141.8, 133.2, 129.5, 128.8, 128.3, 126.3, 123.5, 119.8, 112.1, 111.9, 14.9, 12.2; IR (thin film) 2922, 2852, 1652, 1587, 1445, 1264, 1230, 841, 698 cm<sup>-1</sup>; HRMS (ESI) *m/z* calcd for C<sub>17</sub>H<sub>18</sub>NO<sub>2</sub> (M+H)<sup>+</sup> 268.1332, found 268.1329.

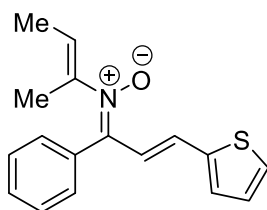

**1s** (*E/Z* = 7:1)

**(2*E*,*NZ*)-*N*-((*E*)-1-Phenyl-3-(thiophen-2-yl)allylidene)but-2-en-2-amine oxide** (**1s**, *E/Z* = 7:1), light yellow solid, 0.047 g, 55% yield. Mp: 118–119 °C; <sup>1</sup>H NMR (400 MHz, CDCl<sub>3</sub>): δ 7.74 (d, *J* = 16.0 Hz, 1H), 7.40–7.33 (m, 3H), 7.19–7.14 (m,



3H), 6.93–6.87 (m, 2H), 6.62 (d,  $J = 16.0$  Hz, 1H), 5.32 (s, 1H), 1.82 (s, 3H), 1.33 (s, 3H);  $^{13}\text{C}$  NMR (100 MHz,  $\text{CDCl}_3$ ):  $\delta$  147.6, 142.0, 141.7, 133.0, 132.5, 129.5, 128.9, 128.6, 128.4, 127.7, 127.1, 123.5, 120.9, 14.9, 12.2; IR (thin film) 2929, 2852, 1638, 1502, 1383, 1230, 1072, 698  $\text{cm}^{-1}$  HRMS (ESI)  $m/z$  calcd for  $\text{C}_{17}\text{H}_{18}\text{NOS}$  ( $\text{M}+\text{H}$ ) $^{+}$  284.1104, found 284.1100.

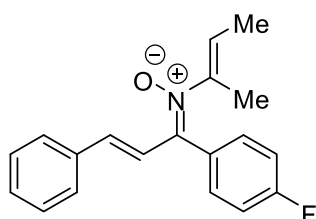

**1u** ( $E/Z = 8:1$ )

**(2E,NE)-N-((E)-1-(4-Fluorophenyl)-3-phenylallylidene)but-2-en-2-amine oxide (1u,  $E/Z = 8:1$ )**, yellow solid, 0.034 g, 38% yield. Mp: 120–121  $^{\circ}\text{C}$ ;  $^1\text{H}$  NMR (400 MHz,  $\text{CDCl}_3$ ):  $\delta$  7.95 (d,  $J = 16.4$  Hz, 1H), 7.36–7.35 (m, 2H), 7.18–7.13 (m, 4H), 7.03–7.01 (m, 2H), 6.54 (d,  $J = 16.4$  Hz, 1H), 5.38–5.28 (m, 1H), 1.82 (d,  $J = 3.6$  Hz, 3H), 1.34 (d,  $J = 6.4$  Hz, 3H);  $^{13}\text{C}$  NMR (100MHz,  $\text{CDCl}_3$ ):  $\delta$  163.8 (d,  $J = 248.6$  Hz), 141.7, 140.0, 135.9, 131.5, 131.4, 129.0, 128.5, 127.3, 123.6, 121.5, 115.6, 115.4, 14.9, 12.1;  $^{19}\text{F}$  NMR (100 MHz,  $\text{CDCl}_3$ ):  $\delta$  -111.2; IR (thin film) 3057, 2921, 2857, 1601, 1513, 1226, 1157, 975, 837, 761  $\text{cm}^{-1}$ ; HRMS (ESI)  $m/z$  calcd for  $\text{C}_{19}\text{H}_{19}\text{FNO}$  ( $\text{M}+\text{H}$ ) $^{+}$  296.1445, found 296.1445.

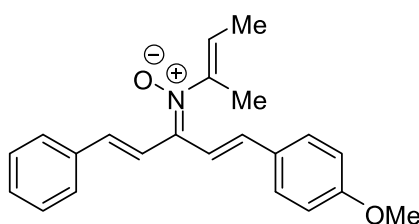

**1v** ( $E/Z = 1:1$ )

**(2E,NE)-N-((1E,4E)-1-(4-Methoxyphenyl)-5-phenylpenta-1,4-dien-3-ylidene)but-2-en-2-amine oxide (1v,  $E/Z = 1:1$ )**, yellow liquid, 0.050 g, 50% yield. *one isomer*:  $^1\text{H}$  NMR (400 MHz,  $\text{CDCl}_3$ ):  $\delta$  7.58 (d,  $J = 7.2$  Hz, 1H), 7.54–7.31 (m, 8H), 6.93–6.89 (m, 3H), 6.82 (d,  $J = 16.0$  Hz, 1H), 5.70–5.67 (m, 1H), 3.82 (s, 3H), 2.11 (s, 3H), 1.79 (d,  $J = 14.4$  Hz, 1H);  $^{13}\text{C}$  NMR (100 MHz,  $\text{CDCl}_3$ ):  $\delta$  160.4, 144.9, 141.7, 139.2, 136.6, 134.1, 129.3, 128.9, 128.8, 128.6, 127.3, 123.1, 120.4, 118.1, 114.3,

55.3, 14.4, 12.6; *another iosmer*:  $^1\text{H}$  NMR (400 MHz,  $\text{CDCl}_3$ ):  $\delta$  7.58 (d,  $J = 7.2$  Hz, 1H), 7.54–7.31 (m, 8H), 6.93–6.89 (m, 4H), 5.70–5.67 (m, 1H), 3.82 (s, 3H), 2.11 (s, 3H), 1.79 (d,  $J = 14.4$  Hz, 1H);  $^{13}\text{C}$  NMR (100 MHz,  $\text{CDCl}_3$ ):  $\delta$  160.2, 144.9, 141.7, 139.0, 136.3, 133.9, 128.9, 128.9, 128.8, 128.1, 126.7, 123.0, 119.2, 116.8, 114.1, 55.2, 14.4, 12.6; IR (thin film) 2932, 2839, 1681, 1512, 1451, 1252, 1175, 966, 731  $\text{cm}^{-1}$ ; HRMS (ESI)  $m/z$  calcd for  $\text{C}_{22}\text{H}_{24}\text{NO}_2$  ( $\text{M}+\text{H}$ ) $^+$  334.1802, found 334.1795.

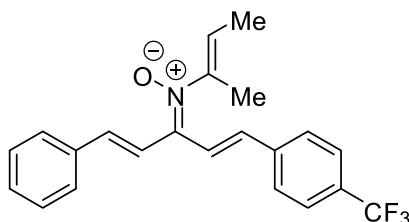

**1w** ( $E/Z = 1:1$ )

**(2*E*,*NE*)-*N*-((1*E*,4*E*)-1-Phenyl-5-(4-(trifluoromethyl)phenyl)penta-1,4-dien-3-ylidene)but-2-en-2-amine oxide (1w,  $E/Z = 1:1$ )**, yellow liquid. 0.083 g, 74% yield. *one iosmer*:  $^1\text{H}$  NMR (400 MHz,  $\text{CDCl}_3$ ):  $\delta$  7.68–7.34 (m, 11H), 7.07 (d,  $J = 8.0$  Hz, 1H), 6.99 (d,  $J = 14.8$  Hz, 1H), 5.72–5.69 (m, 1H), 2.12 (s, 3H), 1.81 (d,  $J = 2.8$  Hz, 3H);  $^{13}\text{C}$  NMR (100 MHz,  $\text{CDCl}_3$ ):  $\delta$  144.1, 141.9, 140.1, 139.3, 136.5, 134.0, 130.6 (q,  $J = 16.8$  Hz), 129.1, 128.8, 127.4, 126.9, 125.9 (q,  $J = 36.0$  Hz), 125.3, 123.5, 122.7, 122.7 (q,  $J = 260.3$  Hz), 14.5, 12.8; *another iosmer*:  $^1\text{H}$  NMR (400 MHz,  $\text{CDCl}_3$ ):  $\delta$  7.68–7.34 (m, 11H), 6.99 (d,  $J = 14.8$  Hz, 2H), 5.72–5.69 (m, 1H), 2.12 (s, 3H), 1.81 (d,  $J = 2.8$  Hz, 3H);  $^{13}\text{C}$  NMR (100 MHz,  $\text{CDCl}_3$ ):  $\delta$  144.0, 141.8, 139.8, 137.2, 136.2, 131.9, 130.3 (q,  $J = 16.8$  Hz), 128.9, 128.7, 127.4, 126.8, 125.7 (q,  $J = 37.0$  Hz), 125.3, 123.4, 122.6, 121.4 (q,  $J = 263.9$  Hz), 14.5, 12.8;  $^{19}\text{F}$  NMR (100 MHz,  $\text{CDCl}_3$ ):  $\delta$  -62.6; IR (thin film) 2926, 2723, 1633, 1453, 1377, 1325, 1165, 972, 694  $\text{cm}^{-1}$ ; HRMS (ESI)  $m/z$  calcd for  $\text{C}_{22}\text{H}_{21}\text{F}_3\text{NO}$  ( $\text{M}+\text{H}$ ) $^+$  372.1570, found 372.1566.

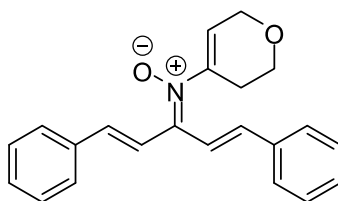

**1ah**

***N*-((1*E*,4*E*)-1,5-Diphenylpenta-1,4-dien-3-ylidene)-3,6-dihydro-2H-pyran-4-amin**

**e oxide (1ah)**, light yellow solid, 0.050 g, 50% yield. Mp: 124–125 °C;  $^1\text{H}$  NMR (400 MHz,  $\text{CDCl}_3$ ):  $\delta$  7.50–7.48 (m, 2H), 7.45 (d,  $J = 11.2$  Hz, 1H), 7.38–7.36 (m, 2H), 7.31–7.24 (m, 6H), 6.91–6.90 (m, 2H), 5.88–5.82 (m, 1H), 4.24–4.18 (m, 2H), 3.90–3.82 (m, 2H), 2.60–2.54 (m, 2H);  $^{13}\text{C}$  NMR (100 MHz,  $\text{CDCl}_3$ ):  $\delta$  145.7, 141.0, 139.8, 136.3, 135.9, 134.6, 129.1, 128.9, 128.7, 128.2, 127.3, 126.8, 123.6, 119.8, 118.9, 64.1, 63.9, 26.3; IR (thin film) 3054, 2926, 2851, 1609, 1574, 1443, 1223, 1187, 965, 759  $\text{cm}^{-1}$ ; HRMS (ESI)  $m/z$  calcd for  $\text{C}_{22}\text{H}_{22}\text{NO}_2$  ( $\text{M}+\text{H}$ ) $^+$  332.1645, found 332.1641.

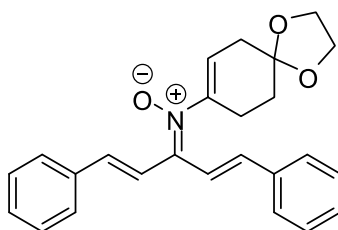

**1ai**

***N*-((1*E*,4*E*)-1,5-Diphenylpenta-1,4-dien-3-ylidene)-1,4-dioxaspiro[4.5]dec-7-en-8-amine oxide (1ai)**, light yellow solid, 0.074 g, 64% yield. Mp: 124–125 °C;  $^1\text{H}$  NMR (400 MHz,  $\text{CDCl}_3$ ):  $\delta$  7.54–7.38 (m, 5H), 7.30–7.22 (m, 6H), 7.07 (d,  $J = 16.0$  Hz, 1H), 6.88 (d,  $J = 16.4$  Hz, 1H), 5.72–5.68 (m, 1H), 3.98–3.92 (m, 4H), 2.66–2.60 (m, 2H), 2.38–2.32 (m, 2H), 1.90–1.88 (m, 2H);  $^{13}\text{C}$  NMR (100 MHz,  $\text{CDCl}_3$ ):  $\delta$  145.4, 143.5, 139.4, 136.4, 136.2, 133.8, 128.9, 128.7, 128.6, 127.3, 126.8, 122.7, 120.3, 118.3, 110.0, 64.5, 34.4, 30.6, 29.5, 25.6; IR (thin film) 2925, 1637, 1451, 1376, 1165, 997, 758, 693  $\text{cm}^{-1}$  HRMS (ESI)  $m/z$  calcd for  $\text{C}_{25}\text{H}_{26}\text{NO}_3$  ( $\text{M}+\text{H}$ ) $^+$  388.1907, found 388.1909.

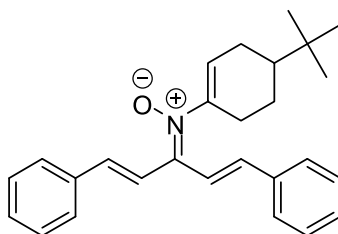

**1aj**

**4-tert-Butyl-*N*-((1*E*,4*E*)-1,5-diphenylpenta-1,4-dien-3-ylidene)cyclohex-1-enamine oxide (1aj)**, yellow liquid. 0.077 g, 67% yield.  $^1\text{H}$  NMR (400 MHz,  $\text{CDCl}_3$ ):  $\delta$  7.50–7.48 (m, 2H), 7.41–7.40 (m, 2H), 7.37–7.22 (m, 7H), 6.90–6.86 (m, 2H),

5.86–5.82 (m, 1H), 2.49–2.32 (m, 2H), 2.20–2.16 (m, 1H), 1.94–1.91 (m, 2H), 1.33–1.32 (m, 2H), 0.83 (s, 9H);  $^{13}\text{C}$  NMR (100 MHz,  $\text{CDCl}_3$ ):  $\delta$  145.3, 144.0, 139.4, 136.4, 136.2, 134.3, 128.9, 128.8, 128.6, 127.3, 126.7, 125.7, 124.0, 120.1, 119.1, 56.9, 53.3, 43.3, 32.1, 27.4, 27.1, 25.7, 23.4; IR (thin film) 2959, 2874, 1720, 1627, 1450, 1216, 1183, 968, 694  $\text{cm}^{-1}$ ; HRMS (ESI)  $m/z$  calcd for  $\text{C}_{27}\text{H}_{32}\text{NO}$  ( $\text{M}+\text{H}$ ) $^+$  386.2478, found 386.2477.

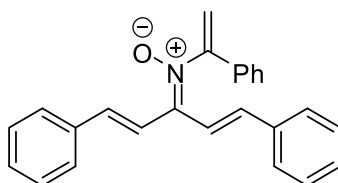

**1a**

***N*-((1*E*,4*E*)-1,5-Diphenylpenta-1,4-dien-3-ylidene)-1-phenylethenamine oxide (1a)**, yellow liquid. 0.074 g, 70% yield.  $^1\text{H}$  NMR (400 MHz,  $\text{CDCl}_3$ ):  $\delta$  7.51 (d,  $J$  = 6.8 Hz, 2H), 7.44 (d,  $J$  = 6.4 Hz, 2H), 7.26–7.14 (m, 13H), 6.88–6.84 (m, 2H), 5.72 (s, 1H), 5.35 (s, 1H);  $^{13}\text{C}$  NMR (100 MHz,  $\text{CDCl}_3$ ):  $\delta$  151.2, 146.3, 139.9, 136.3, 135.8, 134.8, 132.6, 129.4, 129.1, 128.8, 128.7, 128.7, 128.6, 127.3, 126.8, 125.4, 119.7, 118.0, 110.5; IR (thin film) 2924, 2852, 1629, 1447, 1371, 1259, 1176, 962, 691  $\text{cm}^{-1}$ ; HRMS (ESI)  $m/z$  calcd for  $\text{C}_{25}\text{H}_{22}\text{NO}$  ( $\text{M}+\text{H}$ ) $^+$  352.1696, found 352.1692.

## 6. Synthesis of isoxazole 4

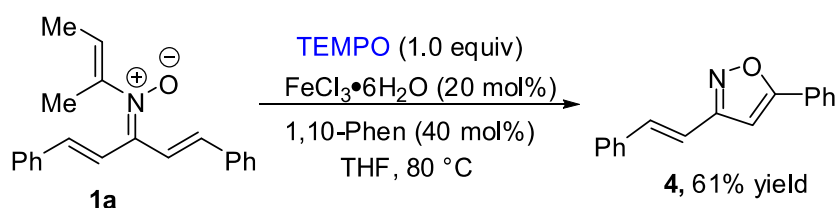

**General procedure D:** A Teflon-sealed flask was charged with *N*-vinyl nitrone **1a** (0.061 g, 0.2 mmol),  $\text{FeCl}_3 \cdot 6\text{H}_2\text{O}$  (11 mg, 20 mol%), 1,10-Phen (15 mg, 40 mol%), TEMPO (31 mg, 1.0 equiv) under  $\text{N}_2$  atmosphere. THF (2 mL) was then added via syringe and the reaction vessel was once again sealed with a Teflon cap. The reaction mixture was stirred at 25  $^\circ\text{C}$  for 5 min and then heated at 80  $^\circ\text{C}$  for 7 h until nitrone **1a** was consumed completely (monitored by TLC). At this time, the solvent was removed under reduced pressure and the crude product was purified by flash column

chromatography (the crude residue was dry loaded on silica gel, 1/50 to 1/20, ethyl acetate/petroleum ether) to afford isoxazole **4**.

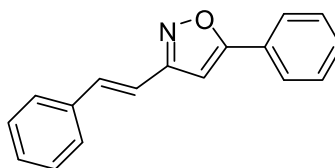

**4**

**(E)-5-Phenyl-3-styrylisoxazole (4)**<sup>[9]</sup>, light yellow solid, 0.030 g, 61% yield. Mp: 112–113 °C; <sup>1</sup>H NMR (400 MHz, CDCl<sub>3</sub>):  $\delta$  7.74–7.72 (m, 2H), 7.47–7.45 (m, 2H), 7.41–7.35 (m, 3H), 7.33–7.23 (m, 3H), 7.18 (d,  $J$  = 16.4 Hz, 1H), 6.63 (d,  $J$  = 16.8 Hz, 1H), 6.67 (s, 1H); <sup>13</sup>C NMR (100 MHz, CDCl<sub>3</sub>):  $\delta$  169.7, 162.2, 135.8, 135.8, 130.2, 129.0, 128.9, 128.8, 127.4, 127.0, 125.8, 116.1, 96.4.

## 7. Synthesis of ligand L5 and L6

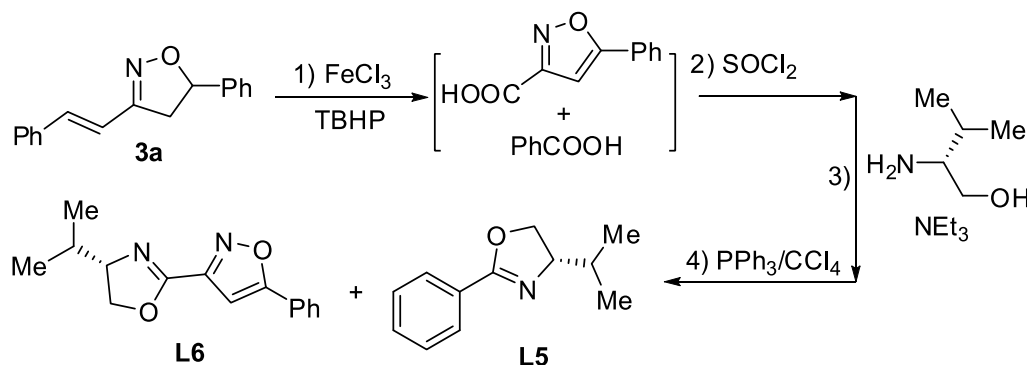

**General procedure E:** A Teflon-sealed reaction flask was charged with isoxazoline **3a** (1 mmol), FeCl<sub>3</sub>•6H<sub>2</sub>O (5 mol%), TBHP (6 mmol, aq. 70%) and 1 mL of water. The reaction was stirred for 1 h and then NaOH (4 mmol) was added. The reaction mixture was then heated at 80 °C (using oil bath) for 10 h. Progress of the reaction was monitored by TLC. The reaction mixture was then cooled to room temperature and extracted with ethyl acetate (2 × 15 mL), and the aqueous layer was treated with diluted HCl and crushed ice. This mixture was then extracted with ethyl acetate (1 × 10 mL) and combined organic phase was washed with saturated brine solution, dried with anhydrous Na<sub>2</sub>SO<sub>4</sub>, and concentrated under reduced pressure to afford the mixture of isoxazole and benzoic acids.

In a 25 mL flask was charged with the above mixture of isoxazole and benzoic acids. Thionyl chloride (2 mL) was added. The reaction mixture was refluxed for 2 h and then concentrated in vacuo. Dry CH<sub>2</sub>Cl<sub>2</sub> (2 mL) was then added, and the mixture was concentrated in vacuo to remove any remaining thionyl chloride.

In a 25 mL flask, L-valinol (1.2 equiv) and Et<sub>3</sub>N (1.5 equiv) were dissolved in dry CH<sub>2</sub>Cl<sub>2</sub> (2 mL) and cooled to 0 °C. The resulted solution of the above chloride in DCM (2 mL) was added dropwise over a period of 10 min. The reaction mixture was stirred at 0 °C for 0.2 h, allowed to warm to room temperature, and stirred for 8 h. The result solution was washed with water (10 mL) and dried over anhydrous Na<sub>2</sub>SO<sub>4</sub>. The solvent was removed in vacuo to give amide as an oil, which was used directly in next step.

To a solution of the above resulted amide in MeCN (2 mL) were added PPh<sub>3</sub> (3 equiv), Et<sub>3</sub>N (3 equiv), and CCl<sub>4</sub> (10 equiv). The reaction mixture was stirred for overnight at room temperature. After completion of the reaction (monitored by TLC), water (10 mL) was added and the resulting mixture was extracted with CH<sub>2</sub>Cl<sub>2</sub> (10 mL). The combined organic phase was dried over anhydrous Na<sub>2</sub>SO<sub>4</sub>. The solvent was removed in vacuo, and the crude product was purified by flash column chromatography (EtOAc / petroleum ether) 1/20–1/10) to give ligand **L5** and **L6**.

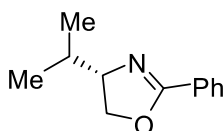

**L5**

**(S)-4-Isopropyl-2-phenyl-4,5-dihydrooxazole (L5)**<sup>[10]</sup>, yellow oil, 0.100 g, 53% yield. <sup>1</sup>H NMR (400 MHz, CDCl<sub>3</sub>): δ 7.96 (d, *J* = 7.2 Hz, 2H), 7.46–7.36 (m, 3H), 4.40–4.35 (m, 1H), 4.14–4.06 (m, 2H), 1.87–1.81 (m, 1H), 1.03 (d, *J* = 6.8 Hz, 3H), 0.92 (d, *J* = 6.8 Hz, 3H); <sup>13</sup>C NMR (100 MHz, CDCl<sub>3</sub>): δ 163.2, 131.0, 128.1, 128.1, 127.8, 72.5, 69.9, 32.7, 18.8, 18.0.

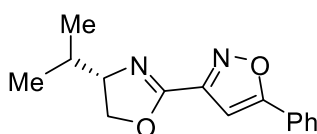

## L6

**(S)-3-(4-Isopropyl-4,5-dihydrooxazol-2-yl)-5-phenylisoxazole (L6)**, yellow oil, 0.095 g, 37% yield.  $^1\text{H}$  NMR (400 MHz,  $\text{CDCl}_3$ ):  $\delta$  7.49–7.47 (m, 2H), 7.38–7.32 (m, 3H), 6.69 (d,  $J$  = 16 Hz, 1H), 4.37–4.32 (m, 1H), 4.07–4.02 (m, 2H), 1.84–1.79 (m, 1H), 1.03 (d,  $J$  = 6.4 Hz, 3H), 0.94 (d,  $J$  = 6.8 Hz, 3H);  $^{13}\text{C}$  NMR (100 MHz,  $\text{CDCl}_3$ ):  $\delta$  163.2, 139.7, 135.3, 129.3, 128.8, 128.7, 127.4, 115.3, 72.6, 69.9, 32.8, 18.9, 18.3; IR (thin film) 2959, 2927, 1654, 1609, 1453, 1362, 1256, 1174, 988, 759, 694  $\text{cm}^{-1}$ ; HRMS (ESI)  $m/z$  calcd for  $\text{C}_{15}\text{H}_{17}\text{N}_2\text{O}_2$  ( $\text{M}+\text{H}$ ) $^+$  257.1285, found 257.1281;  $[\alpha]_{\text{D}}^{20} = -6.8^\circ$  ( $c$  = 0.1, MeOH).

## 8. Synthesis of epoxypyridine 5

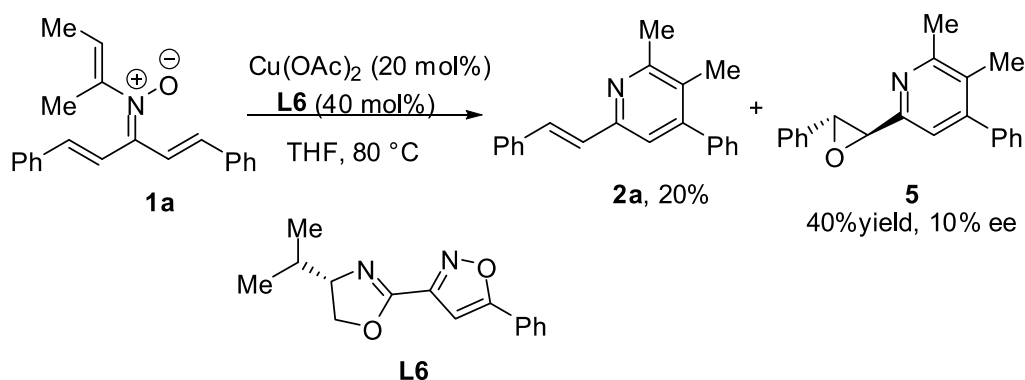

**General procedure F:** A Teflon-sealed flask was charged with *N*-vinyl nitron **1a** (61 mg, 0.2 mmol),  $\text{Cu}(\text{OAc})_2$  (7 mg, 20 mol%), **L6** (21 mg, 40 mol%) under  $\text{N}_2$  atmosphere. THF (2 mL) was then added via syringe and the reaction vessel was once again sealed with a Teflon cap. The reaction mixture was stirred at 25 °C for 5 min and then heated at 80 °C for 10 h until nitron **1a** was consumed completely (monitored by TLC). At this time, the solvent was removed under reduced pressure and the crude product was purified by flash column chromatography (the crude residue was dry loaded on silica gel, 1/50 to 1/20, ethyl acetate/petroleum ether) to afford pyridine **2a** (20% yield) and epoxypyridine **5** (40% yield).

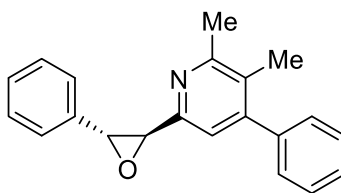

**5**

**2,3-Dimethyl-4-phenyl-6-(3-phenyloxiran-2-yl)pyridine (5)**, light yellow oil, 0.024 g, 40% yield.  $^1\text{H}$  NMR (400 MHz,  $\text{CDCl}_3$ ):  $\delta$  7.47–7.40 (m, 3H), 7.37–7.29 (m, 7H), 7.07 (s, 1H), 4.05 (d,  $J = 3.2$  Hz, 2H), 2.60 (s, 3H), 2.21 (s, 3H);  $^{13}\text{C}$  NMR (100 MHz,  $\text{CDCl}_3$ ):  $\delta$  157.7, 152.4, 150.3, 139.7, 136.9, 128.7, 128.6, 128.4, 128.3, 128.3, 127.8, 125.7, 118.5, 62.9, 61.8, 23.4, 16.1; IR (thin film) 3032, 2967, 2931, 1614, 1551, 1495, 1452, 1260, 1071, 967, 752  $\text{cm}^{-1}$ , HRMS (ESI)  $m/z$  calcd for  $\text{C}_{21}\text{H}_{20}\text{NO}$  ( $\text{M}+\text{H}$ ) $^+$  302.1539, found 302.1536. Ee = 10%, conditions: AD-H; hexane/i-PrOH = 95/5; flow rate: 0.3 mL/min;  $\lambda = 254$  nm; t (minor) = 50.0 min; t (major) = 73.3 min.

## 9. References

- [1] D. Kontokosta, D. S. Muller, D.-L. Mo, W. H. Pace, R. A. Simpon, and L. L. Anderson, *Beilstein J. Org. Chem.* 2015, **11**, 2097.
- [2] C. K. Banerjee, J. D. Umarye, and P. R. Kanjilal, *Synth. Commun.* 2013, **43**, 2208.
- [3] Liu, J.; Wei, W.; Zhao, T.; Liu, X. Y.; Wu, J.; Yu, W. Q.; Chang, Junbiao; *J. Org. Chem.* **2016**, *81*, 9326.
- [4] D. Muri, J. W. Bode, and E. M. Carreira, *Org. Lett.* 2000, **2**, 539.
- [5] D. Shi, H.-T. Qin, C. Zhu, and F. Liu, *Eur. J. Org. Chem.* 2015, 5084.
- [6] A. Yoshimura, C. Zhu, K. R. Middleton, A. D. Todora, B. J. Kastern, A. V. Maskaev, and V. V. Zhdankin, *Chem. Commun.* 2013, **49**, 4800.
- [7] H. Huang, F. Li, Z. Xu, J. Cai, X. Ji, and G.-J. Deng, *Adv. Synth. Catal.* 2017, **359**, 3102.
- [8] N. Zou, J.-W. Jiao, Y. Feng, C.-H. Chen, C. Liang, G.-F. Su, and D.-L. Mo, *Adv. Synth. Catal.* 2017, **359**, 3545.
- [9] S. Tang, J. He, Y. Sun, L. He, and X. She, *Org. Lett.* 2009, **11**, 3982.
- [10] P. Wipf, and X. Wang, *J. Comb. Chem.* 2002, **4**, 656.



## 10. X-ray structure of compounds 2n and 3m

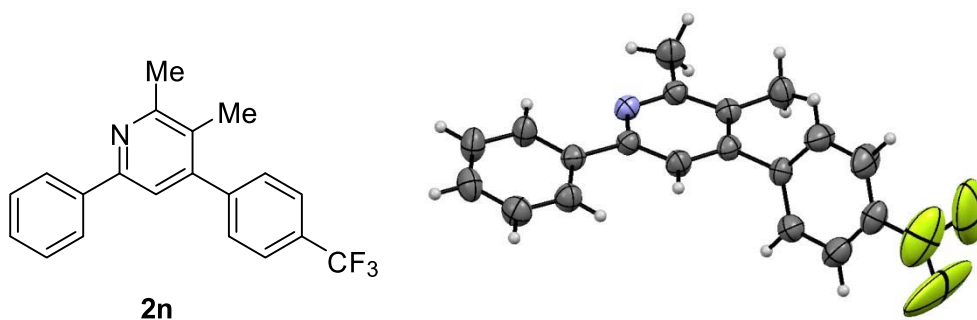

**Figure S1:** ORTEP diagram of **2n** at 50% ellipsoid probability.

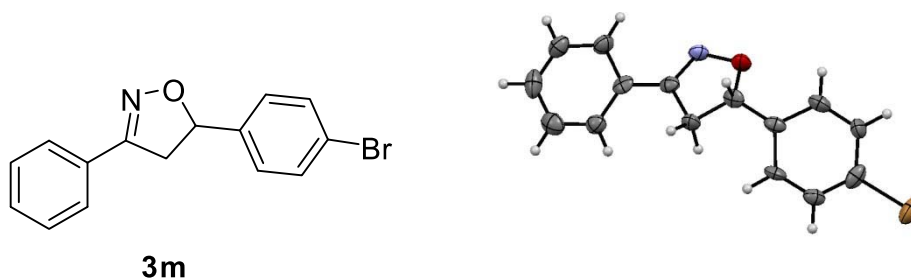

**Figure S2:** ORTEP diagram of **3m** at 50% ellipsoid probability.

## 11. NMR spectra for 2, 3, 1, 4, L5, L6, 5, and HPLC for 5

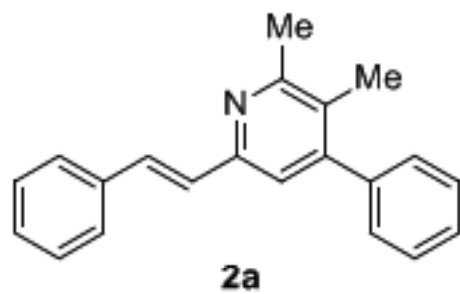

7.489  
7.471  
7.448  
7.390  
7.373  
7.355  
7.334  
7.317  
7.289  
7.270  
7.249  
7.229  
7.199  
7.181  
7.165  
7.117  
7.095  
7.077

2.540

2.108

1.208  
1.180

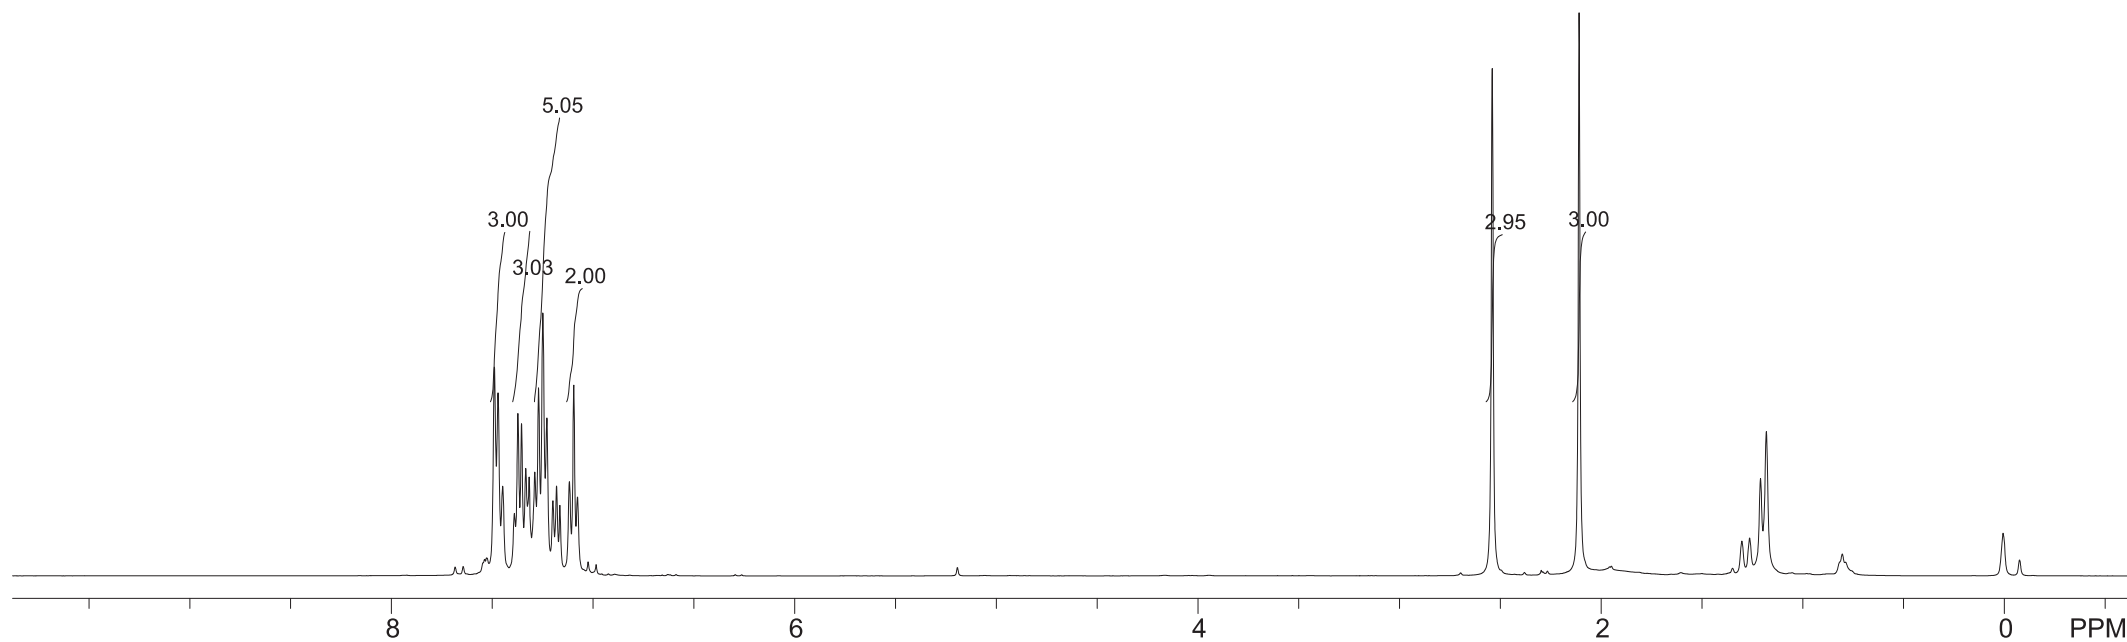

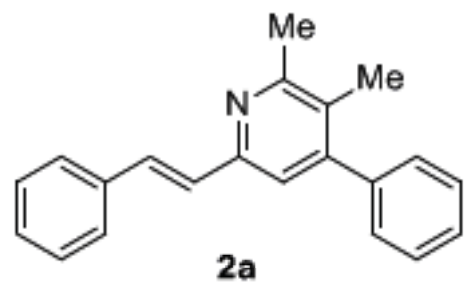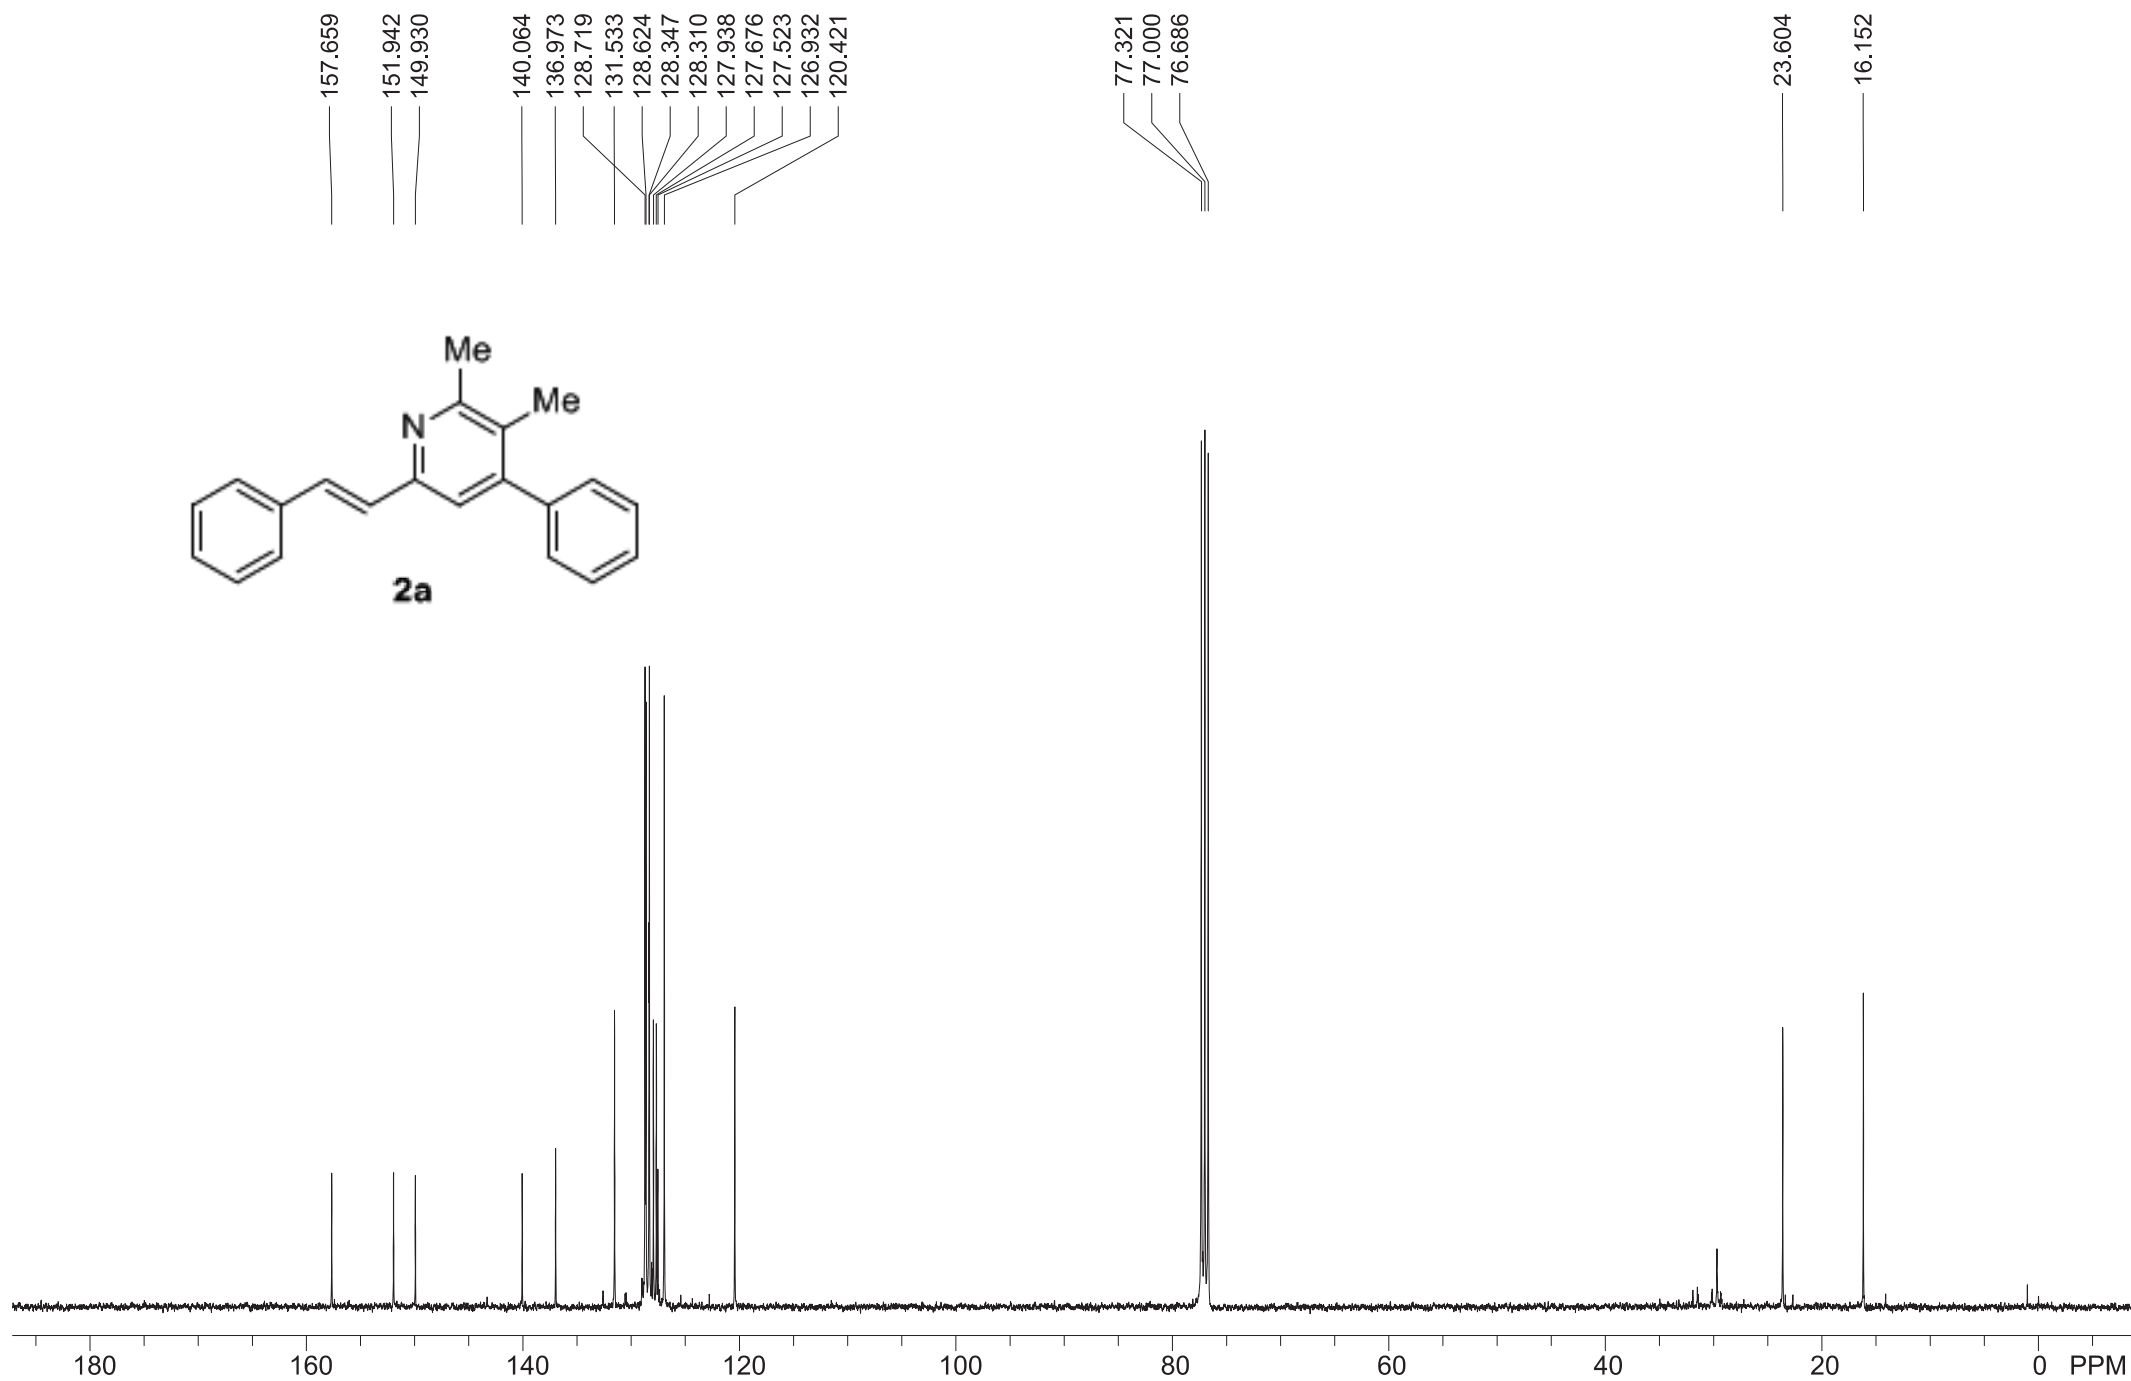

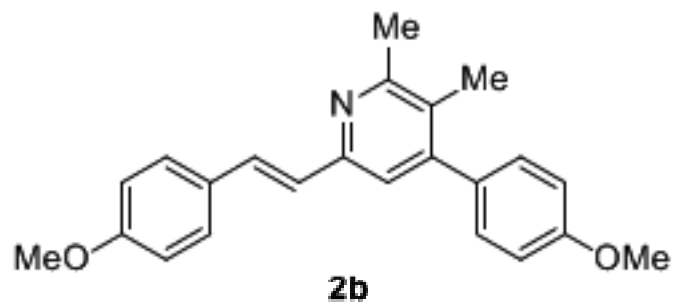

7.438  
7.417  
7.397  
7.194  
7.183  
7.174  
7.062  
6.995  
6.954  
6.922  
6.900  
6.830  
6.809

3.793  
3.748

2.531

2.123

0.000

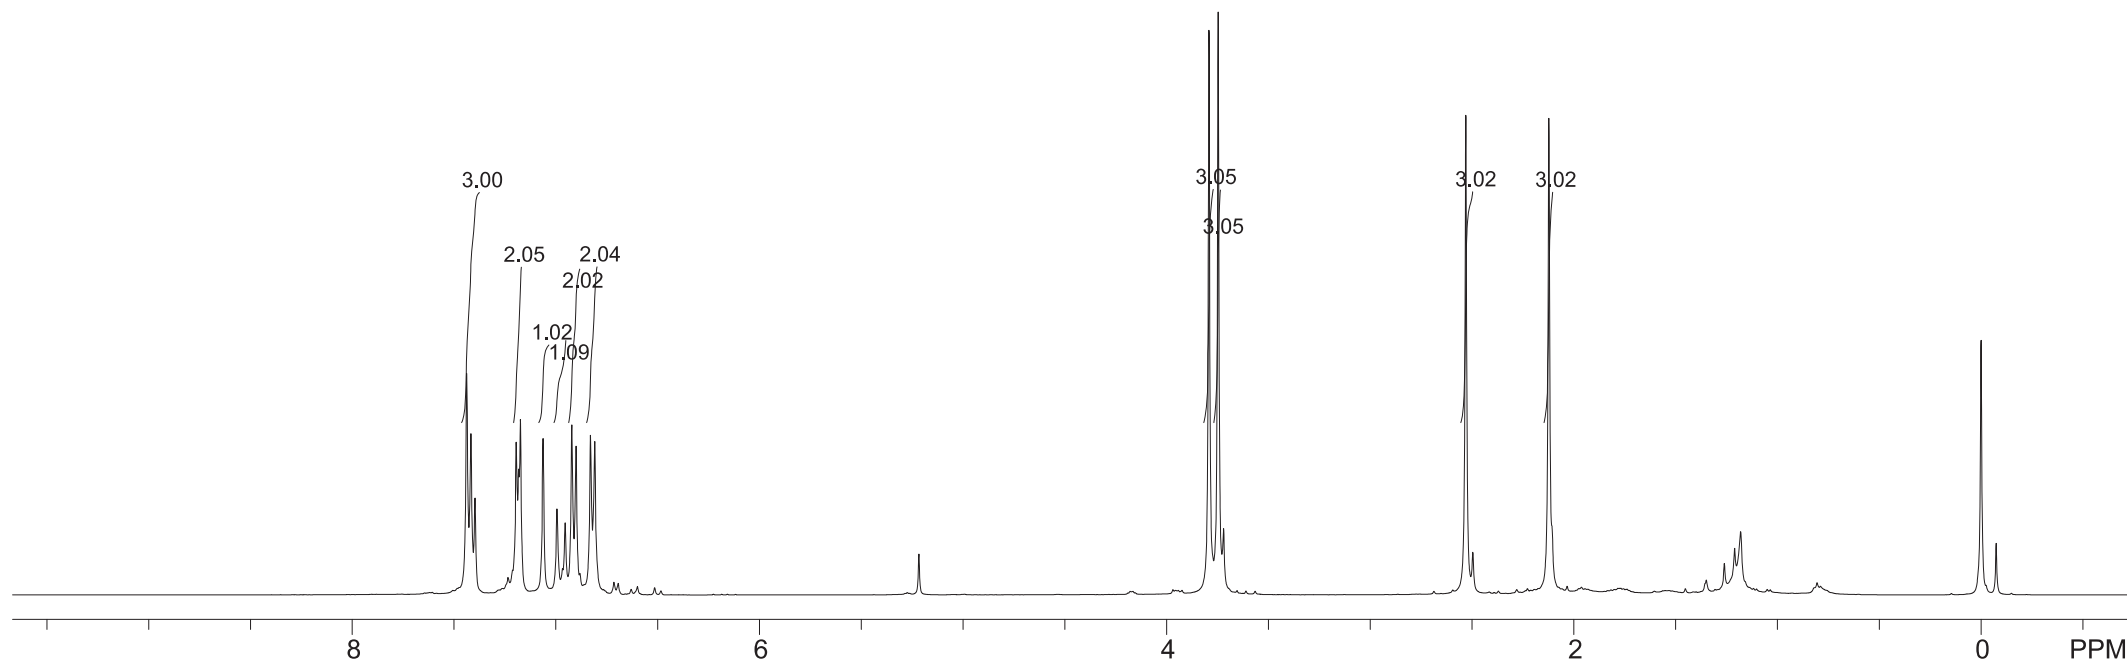

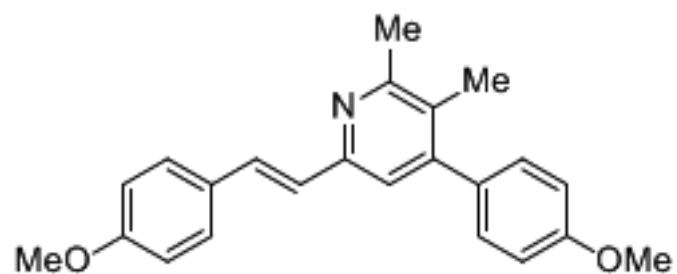

**2b**

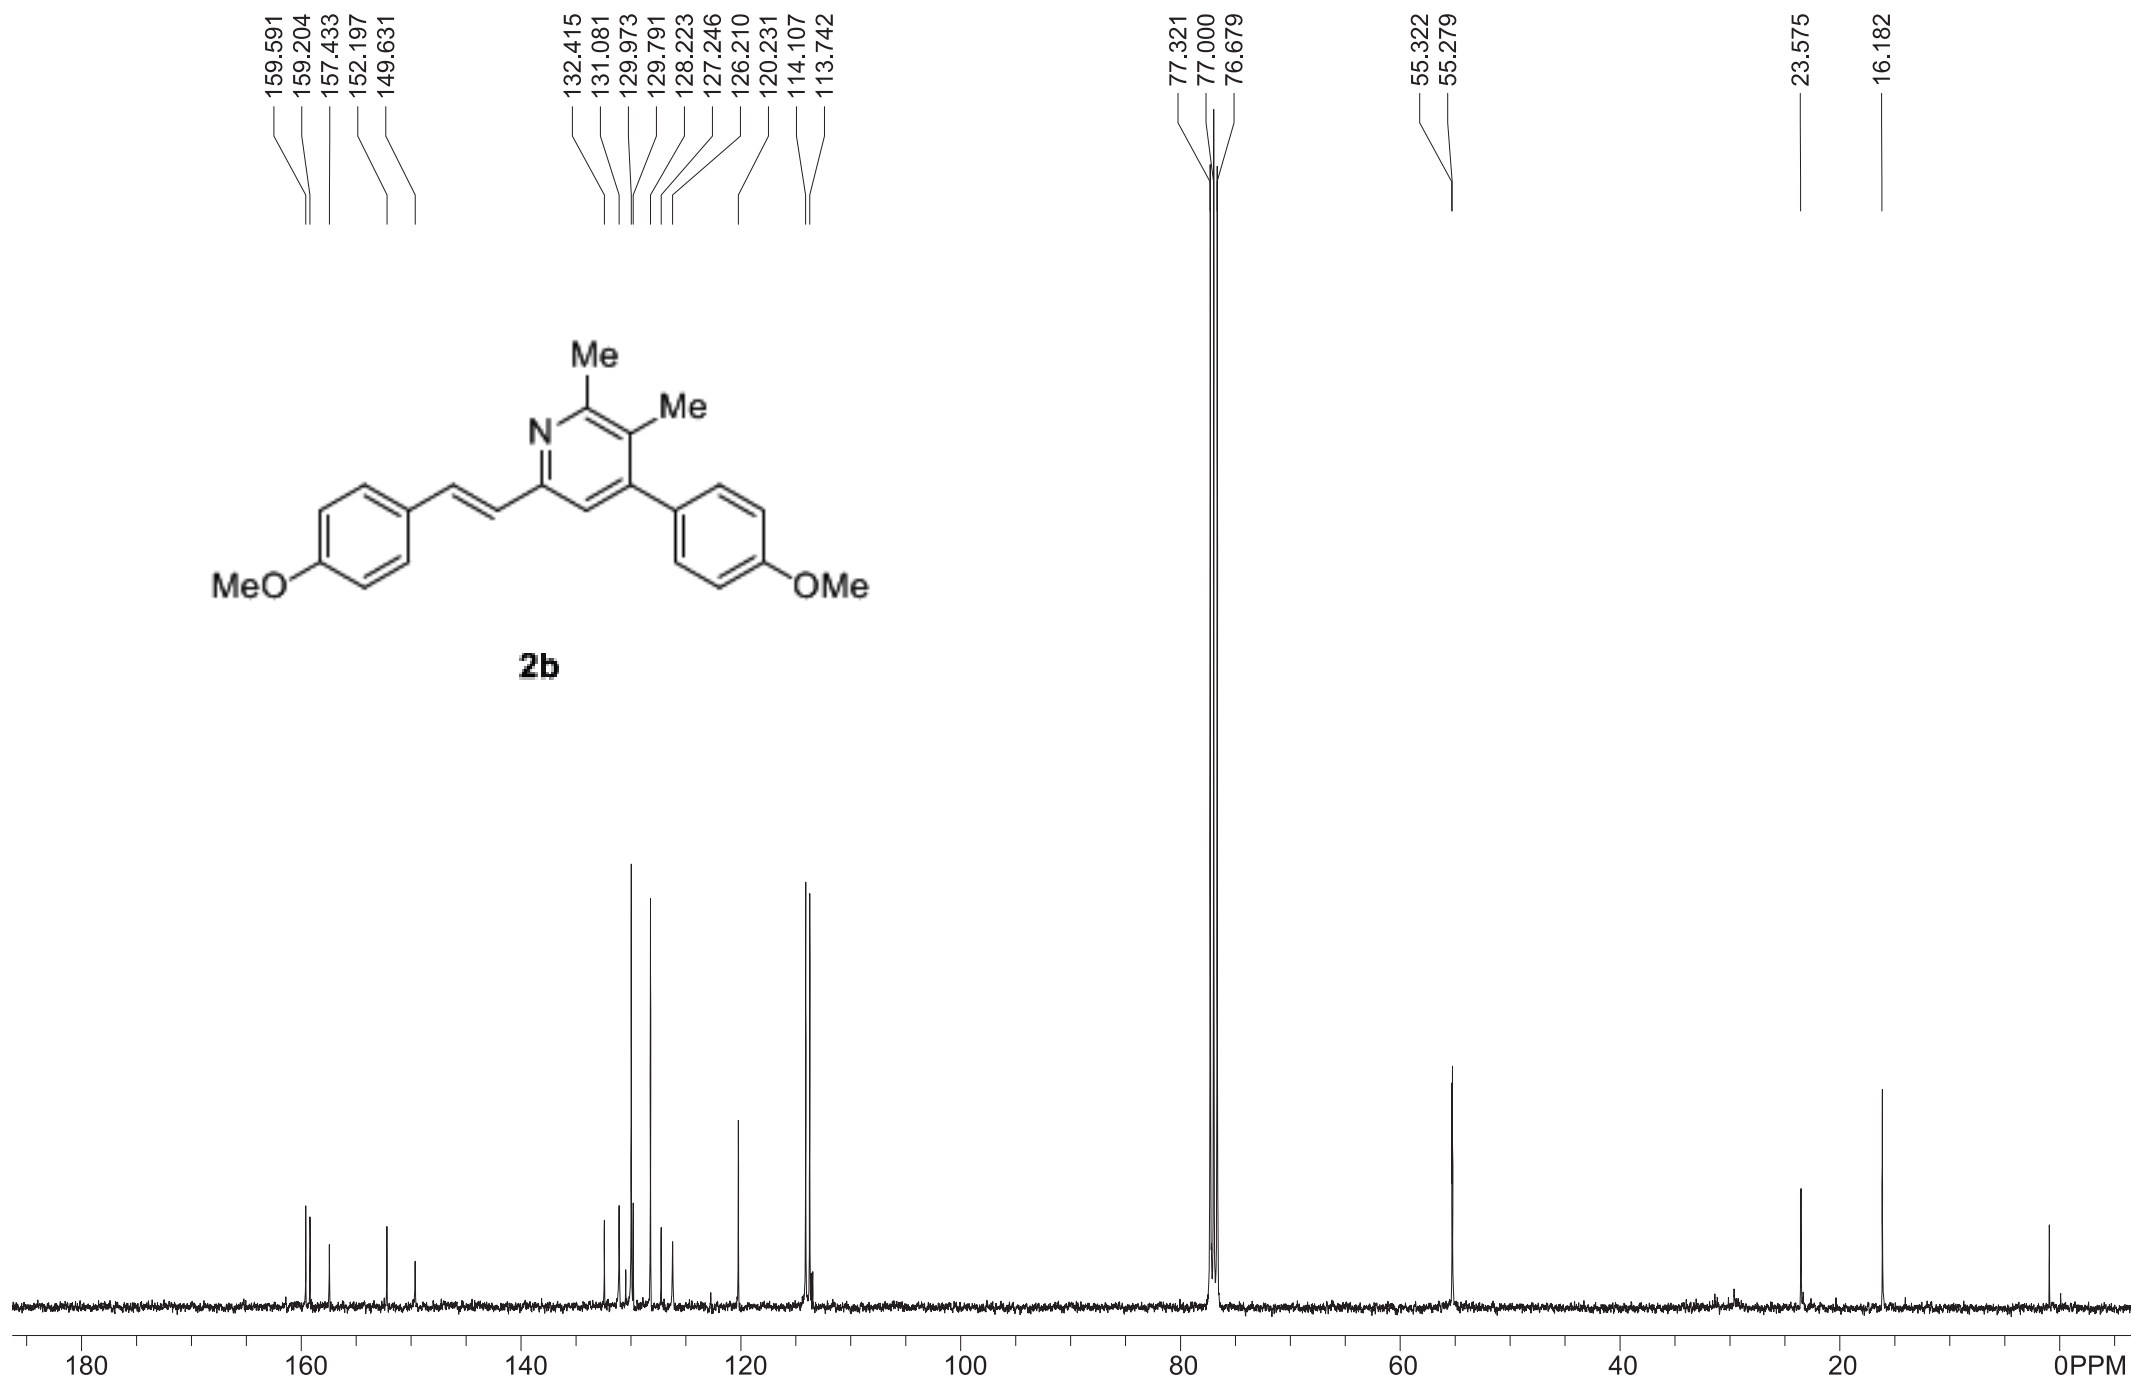

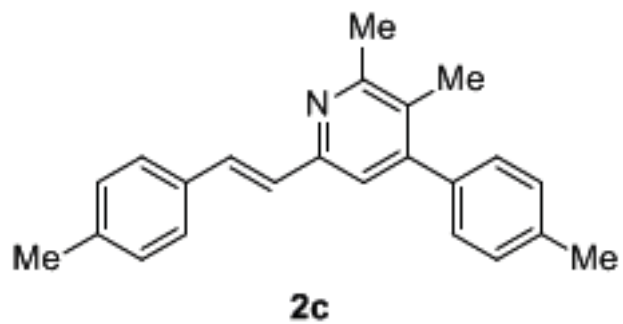

7.443  
7.403  
7.378  
7.358  
7.179  
7.160  
7.132  
7.113  
7.078  
7.060  
7.019

2.519  
2.329  
2.259  
2.100

0.000

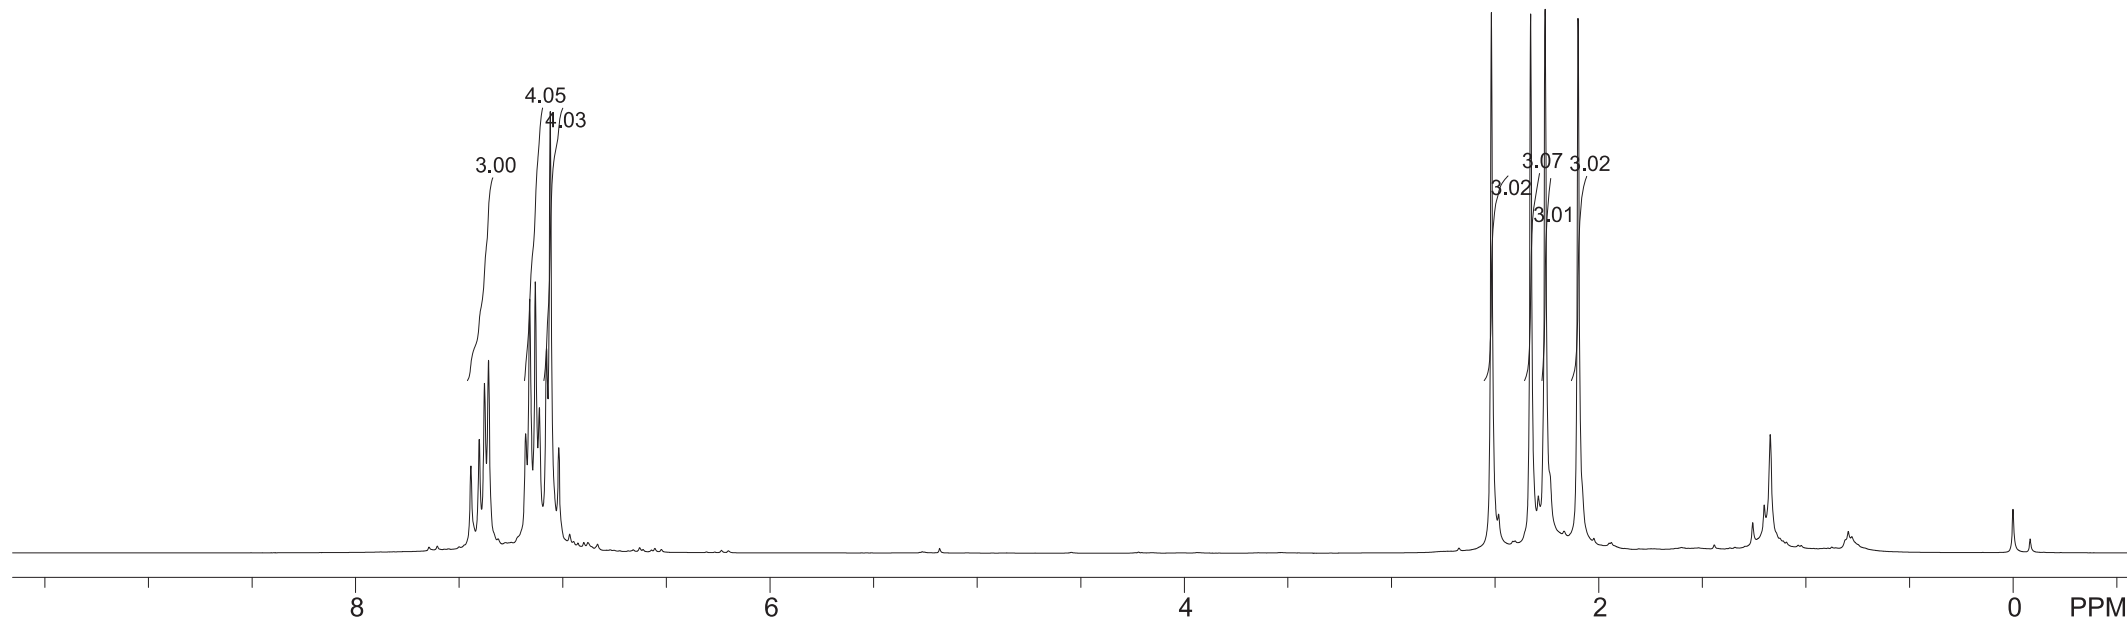

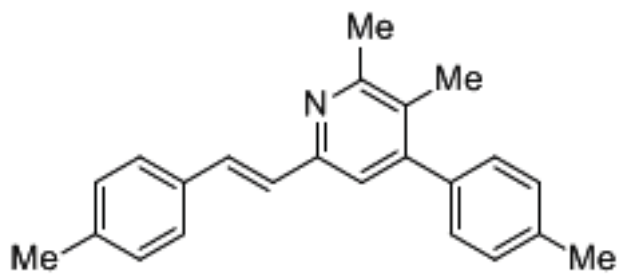

**2c**

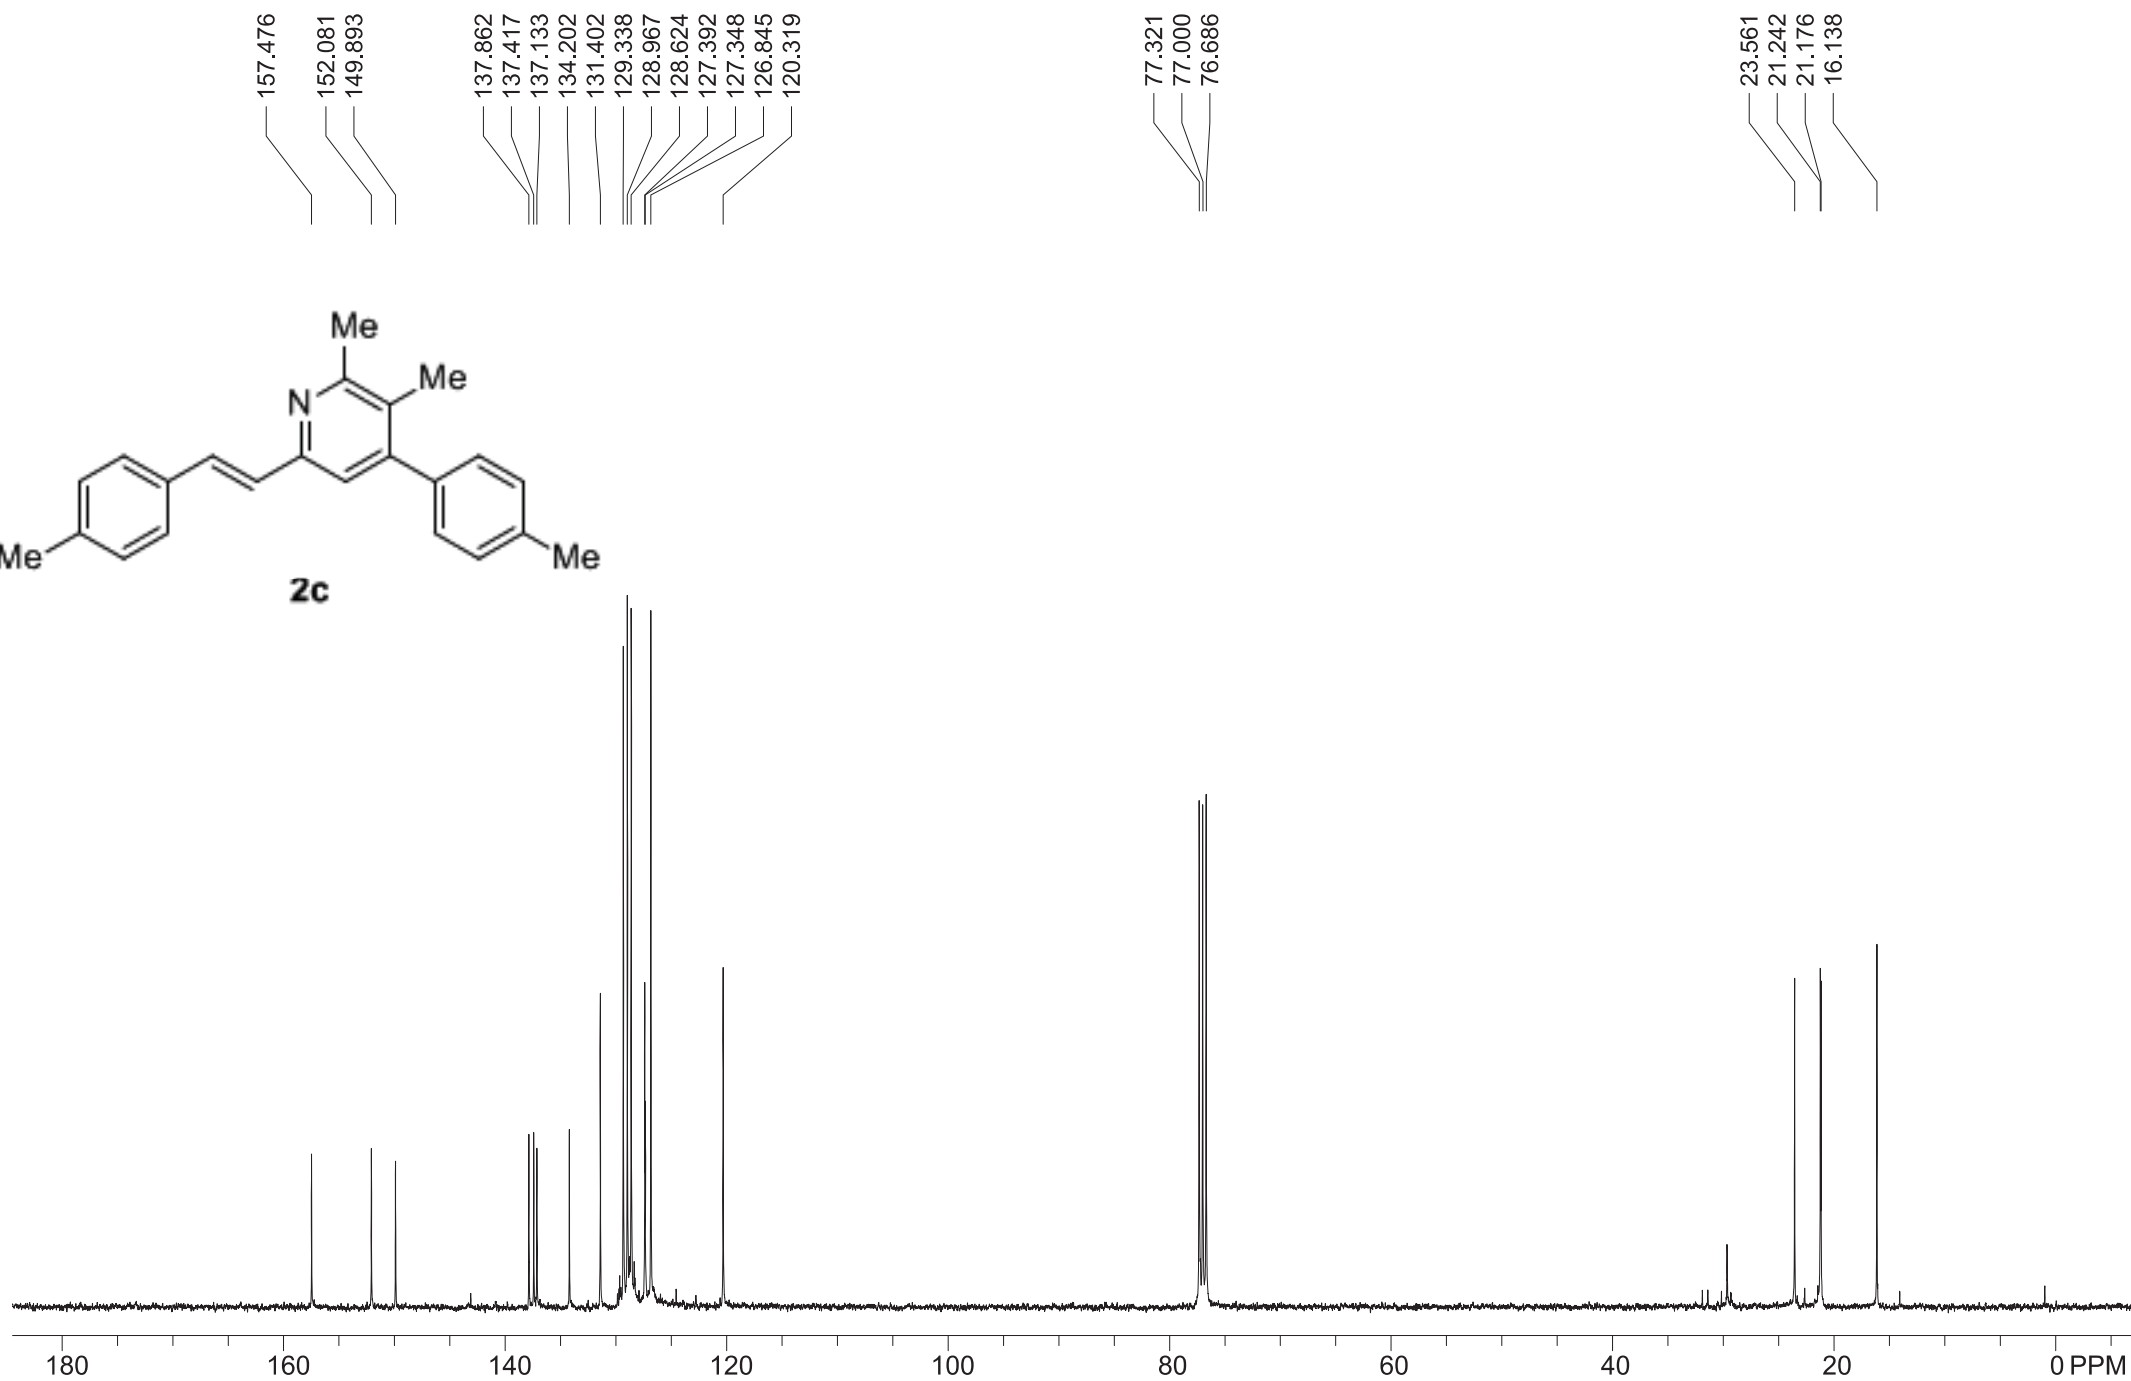

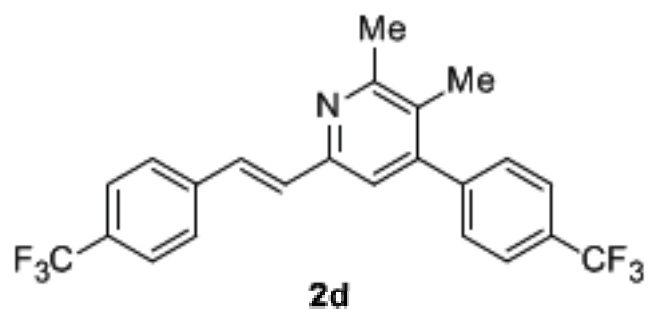

7.912  
7.884  
7.867  
7.851  
7.827  
7.810  
7.799  
7.782  
7.754  
7.746  
7.738  
7.597  
7.581  
7.402  
7.389  
7.357  
7.292  
7.284  
7.260

2.784  
2.333

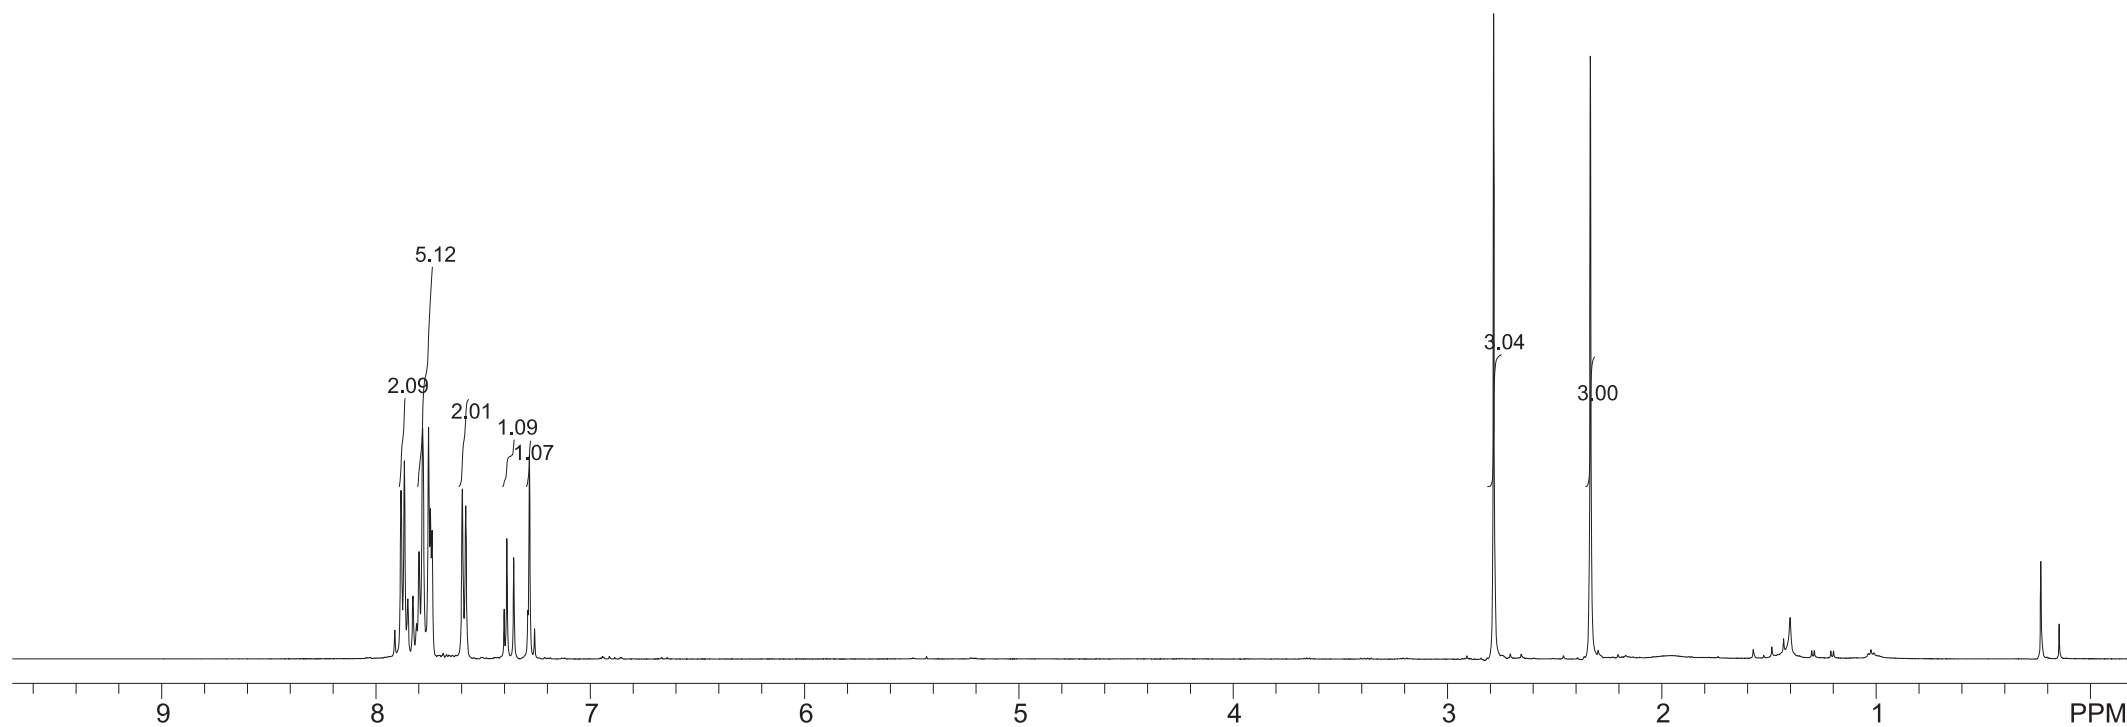



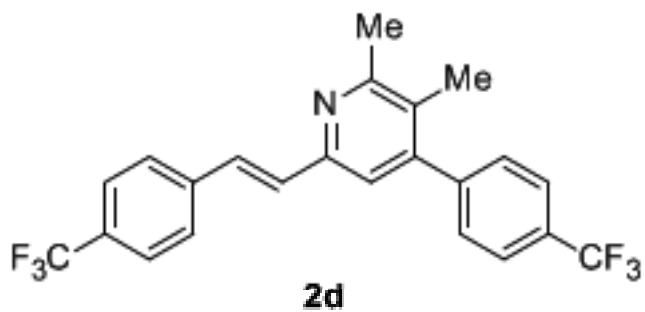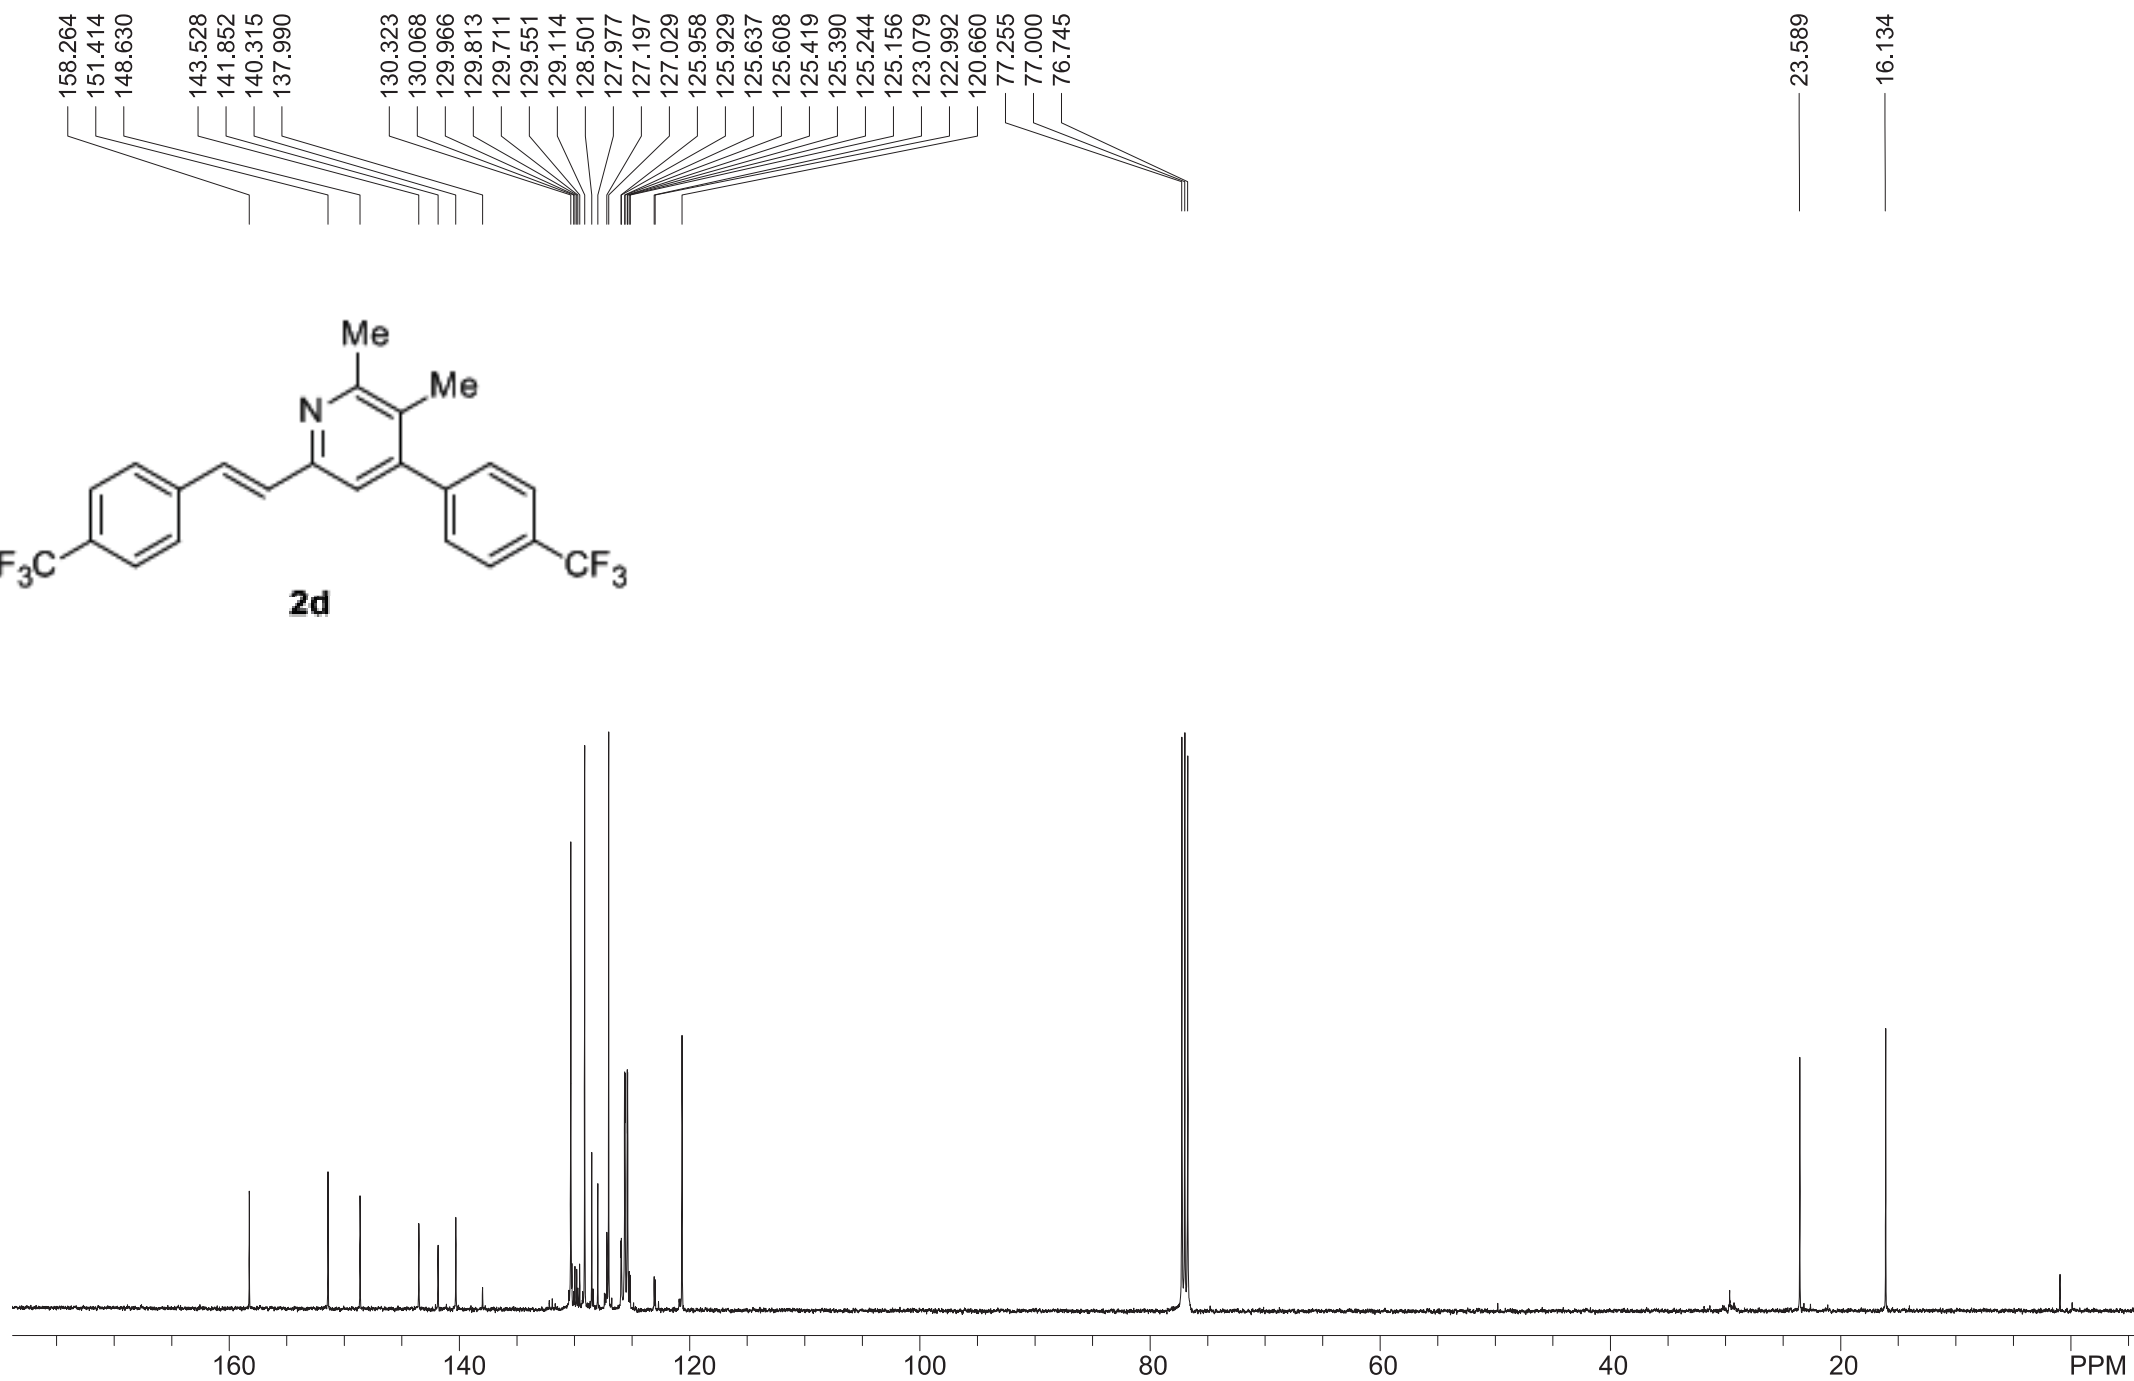

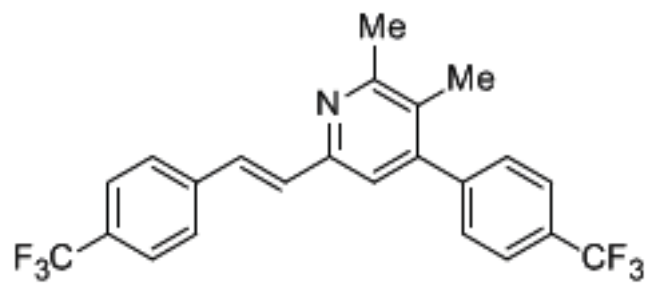

**2d**

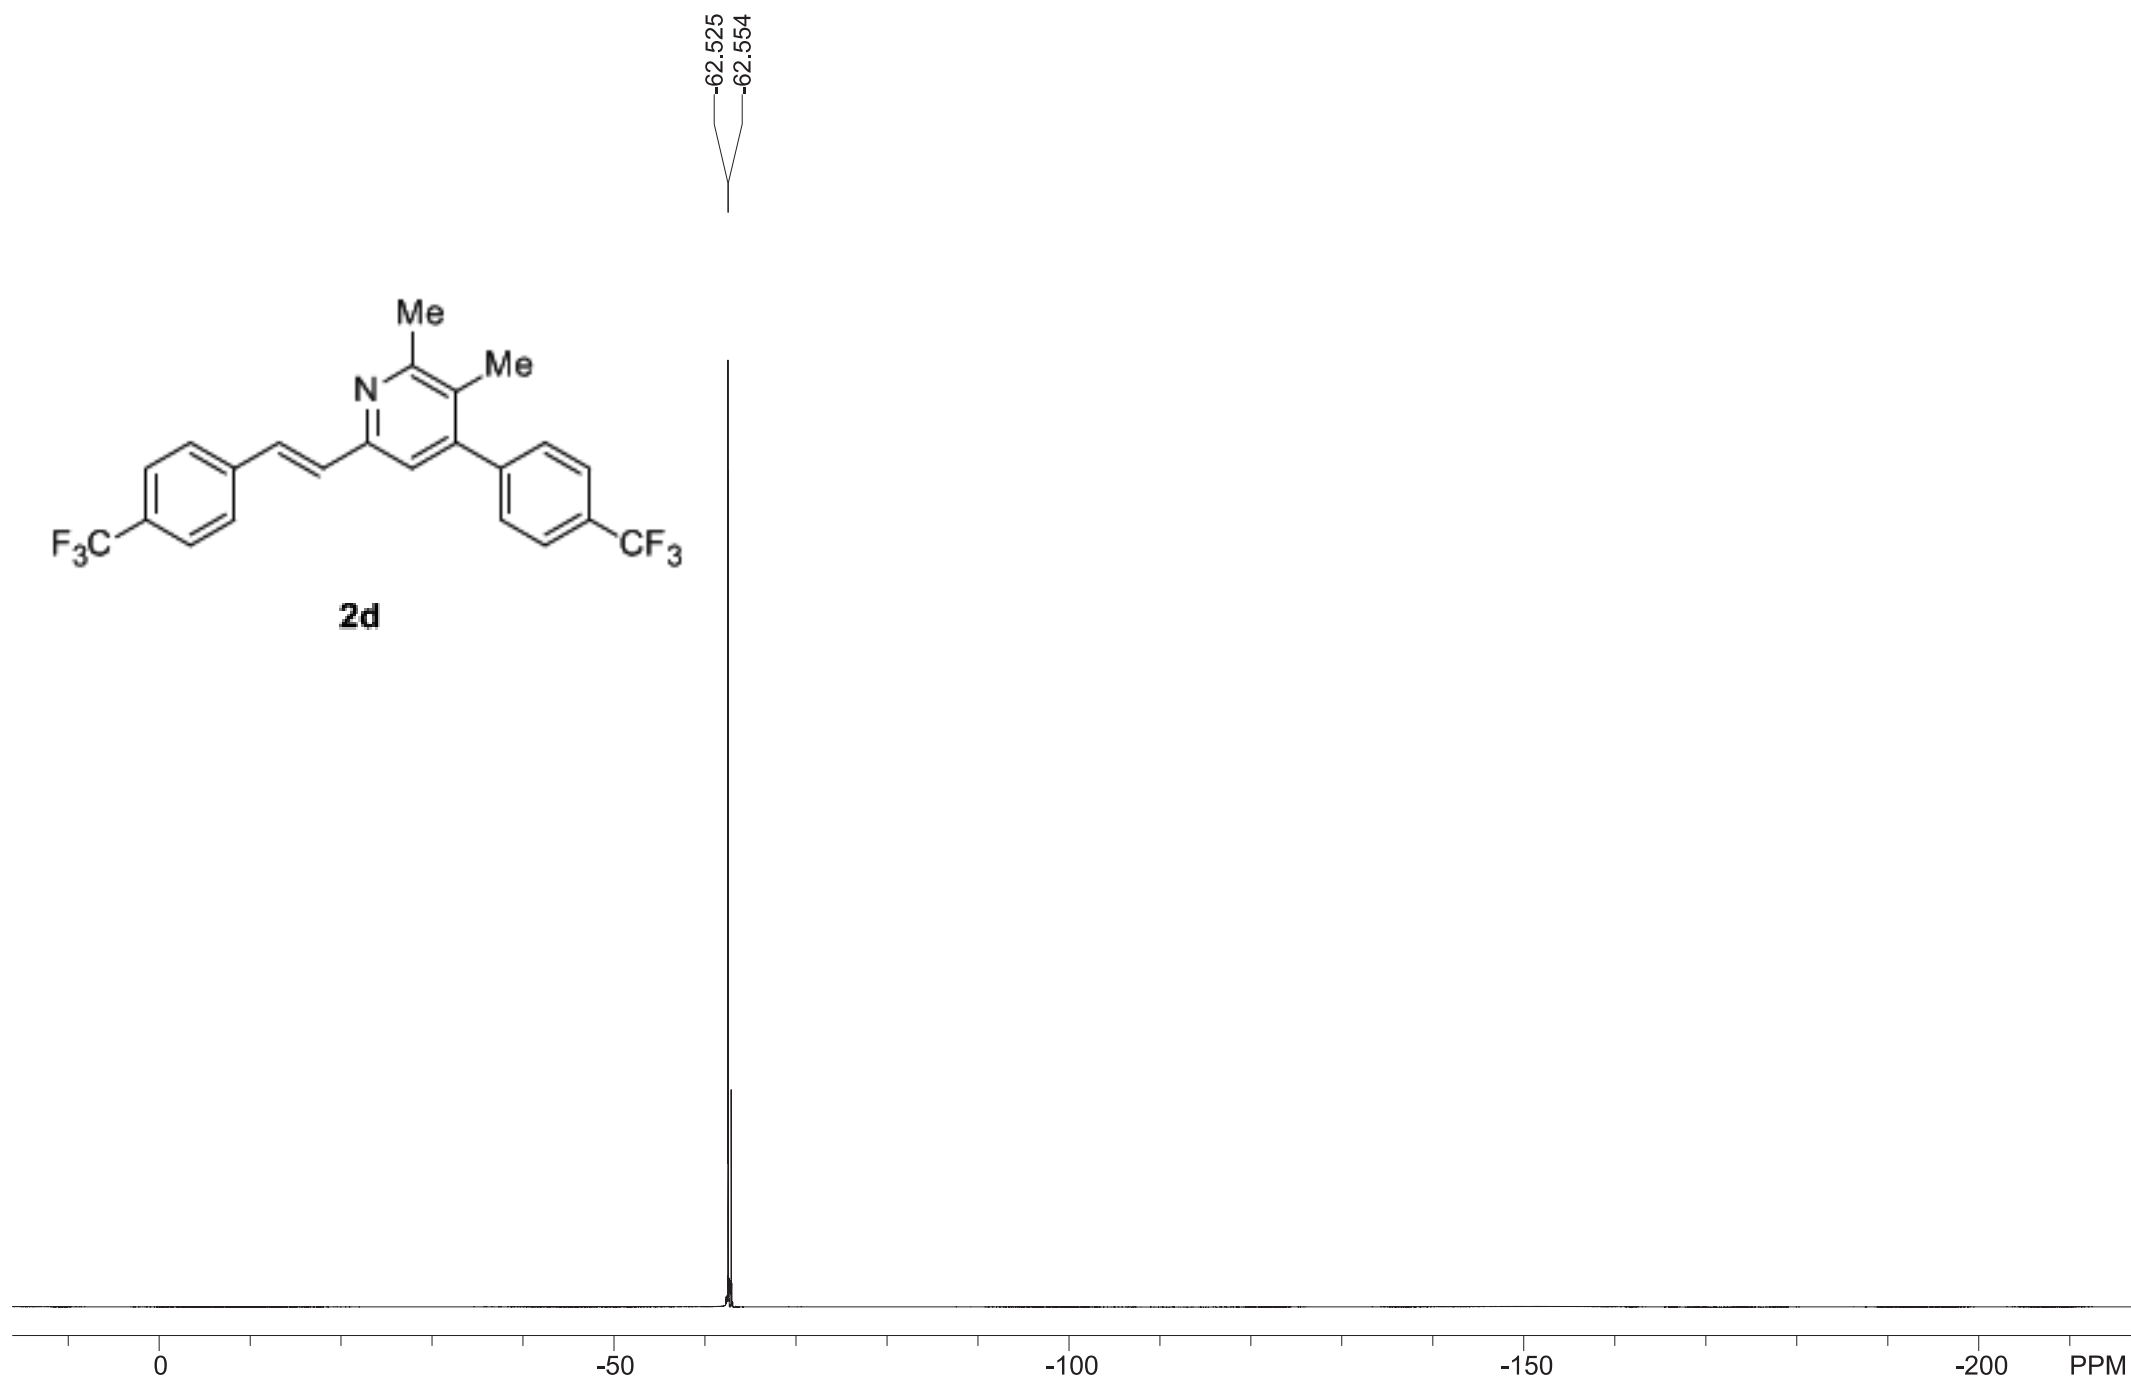

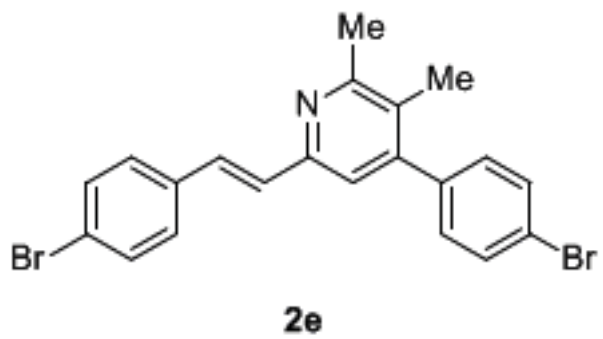

7.597  
7.583  
7.515  
7.487  
7.481  
7.467  
7.423  
7.409  
7.260  
7.195  
7.181  
7.160  
7.133  
7.104

2.618

2.174

3.15  
3.14  
2.10  
2.00  
1.01

3.02  
3.01

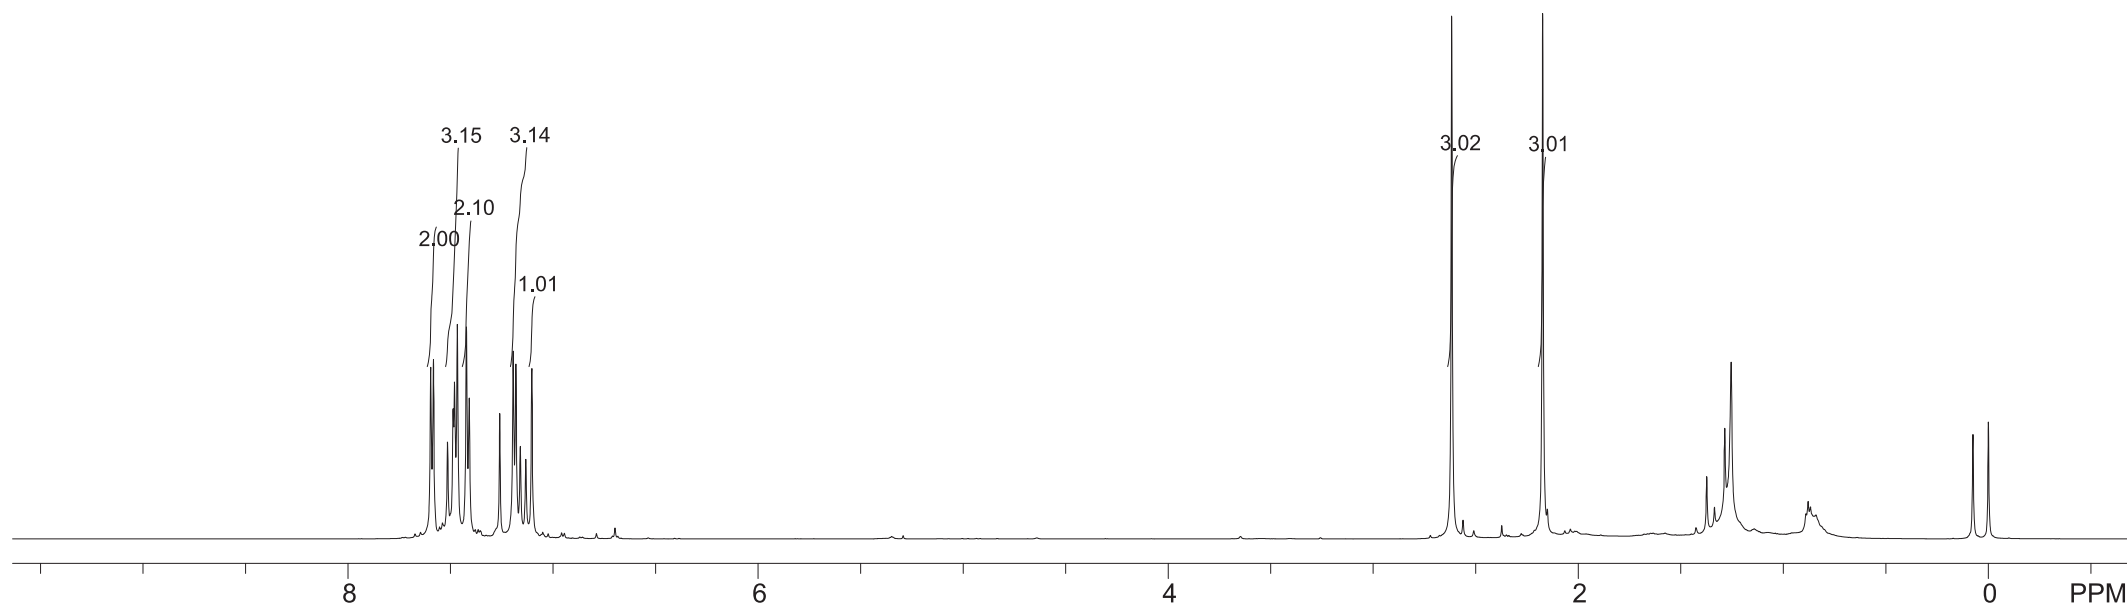

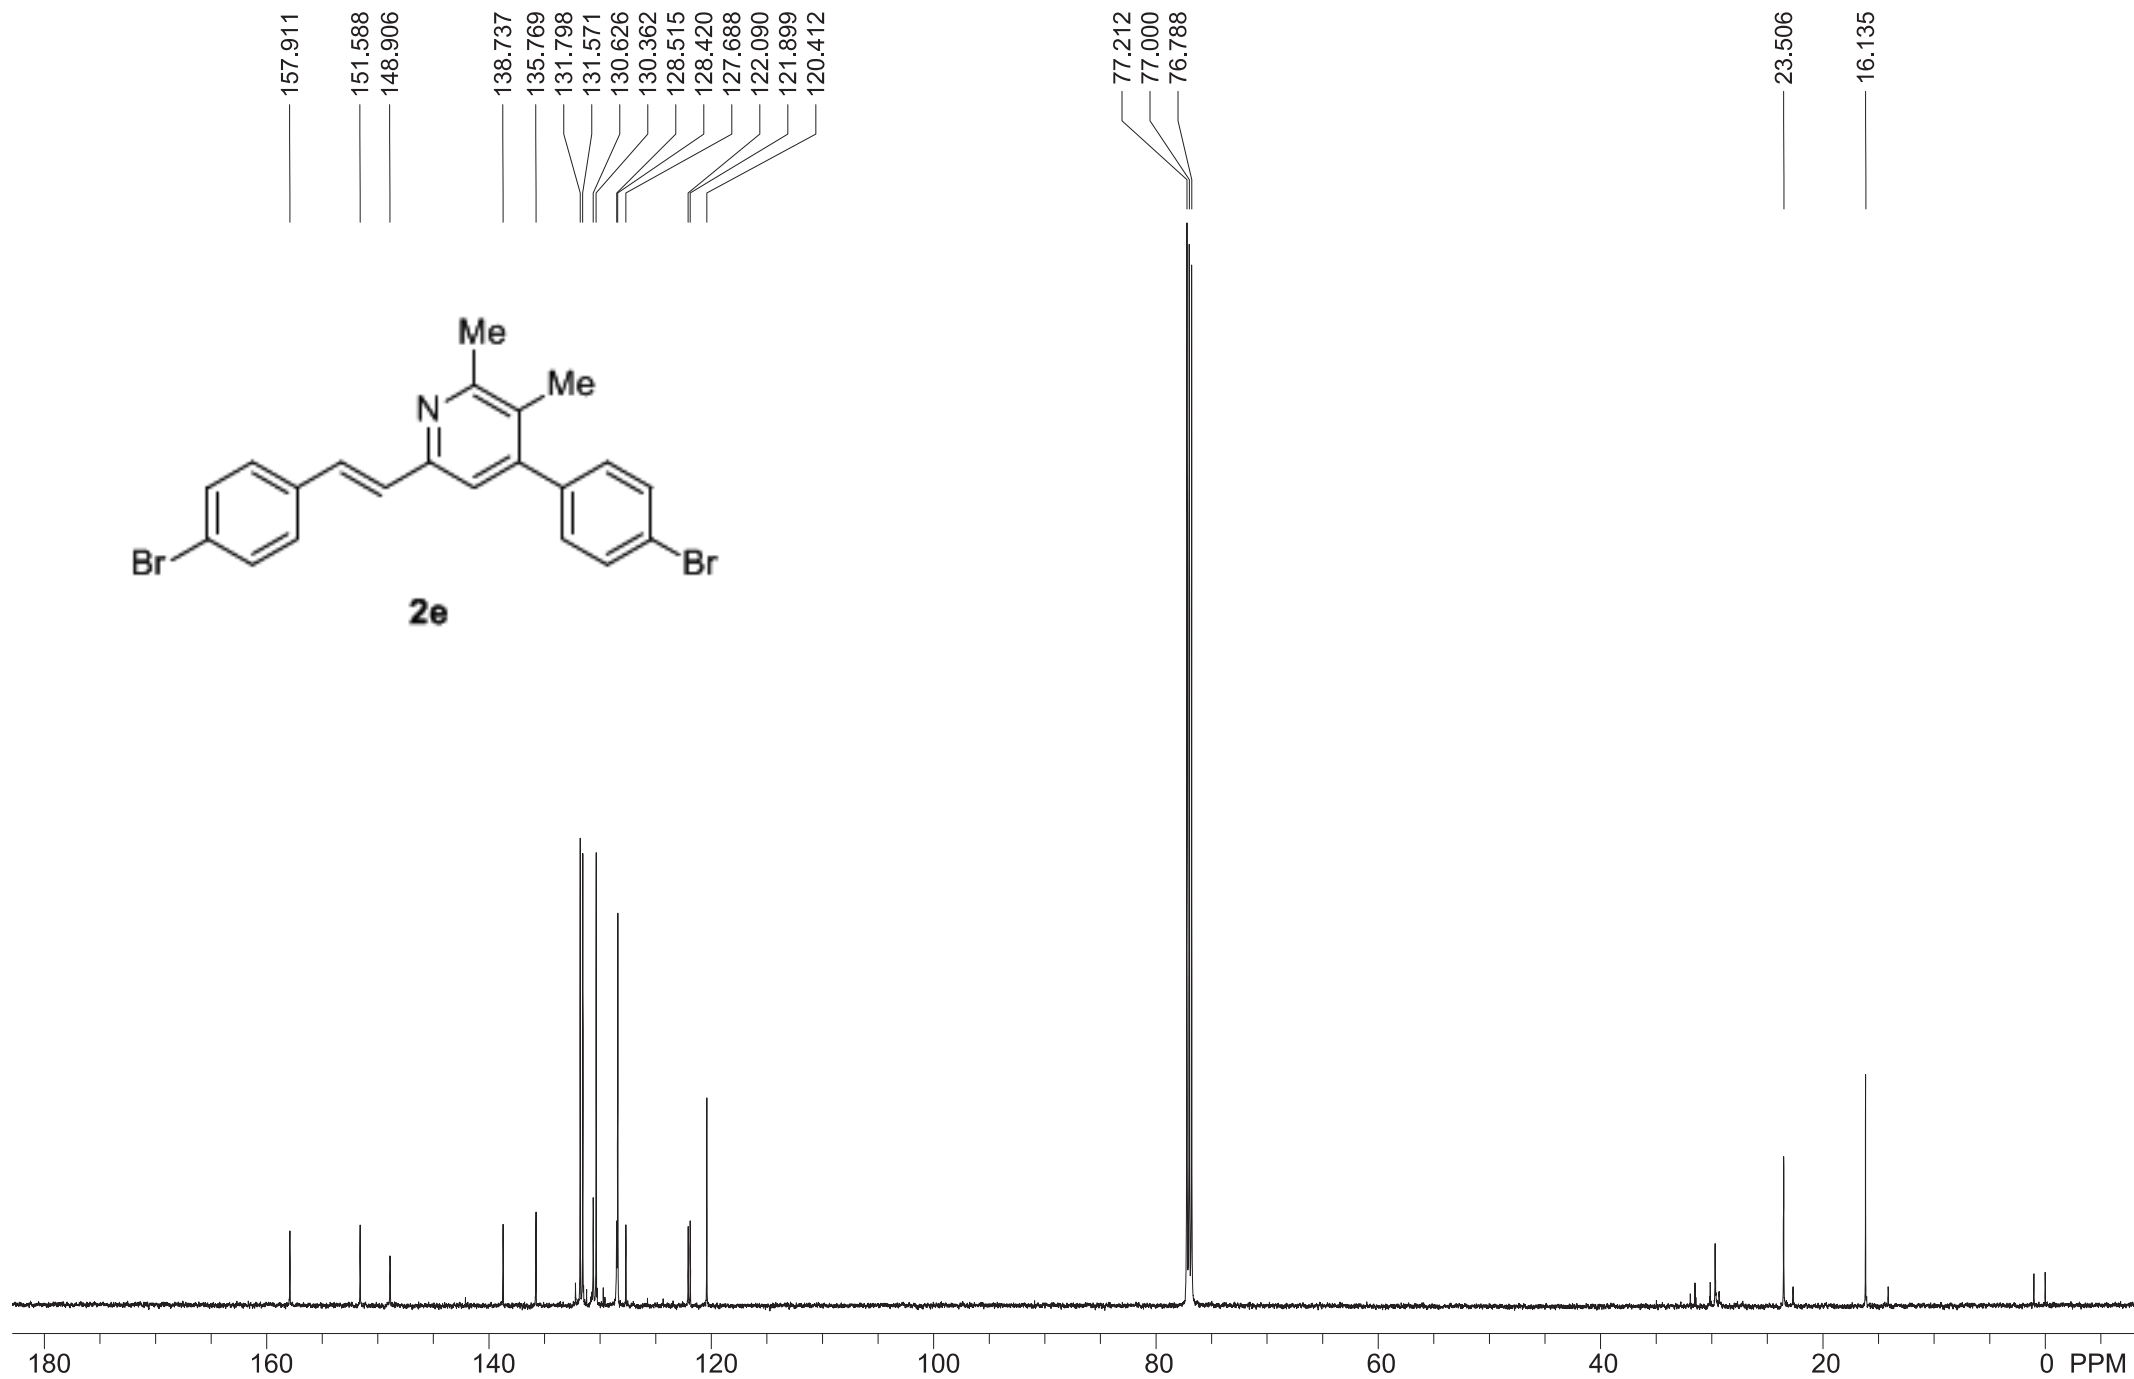

7.861  
7.835  
7.727  
7.714  
7.696  
7.682  
7.584  
7.571  
7.416  
7.404  
7.391  
7.317  
7.305  
7.292  
7.280  
7.259  
7.218  
7.206  
7.175  
7.152  
7.138  
7.126  
7.113

2.640

2.056

-0.000

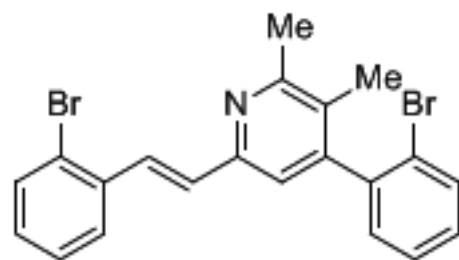

**2f**

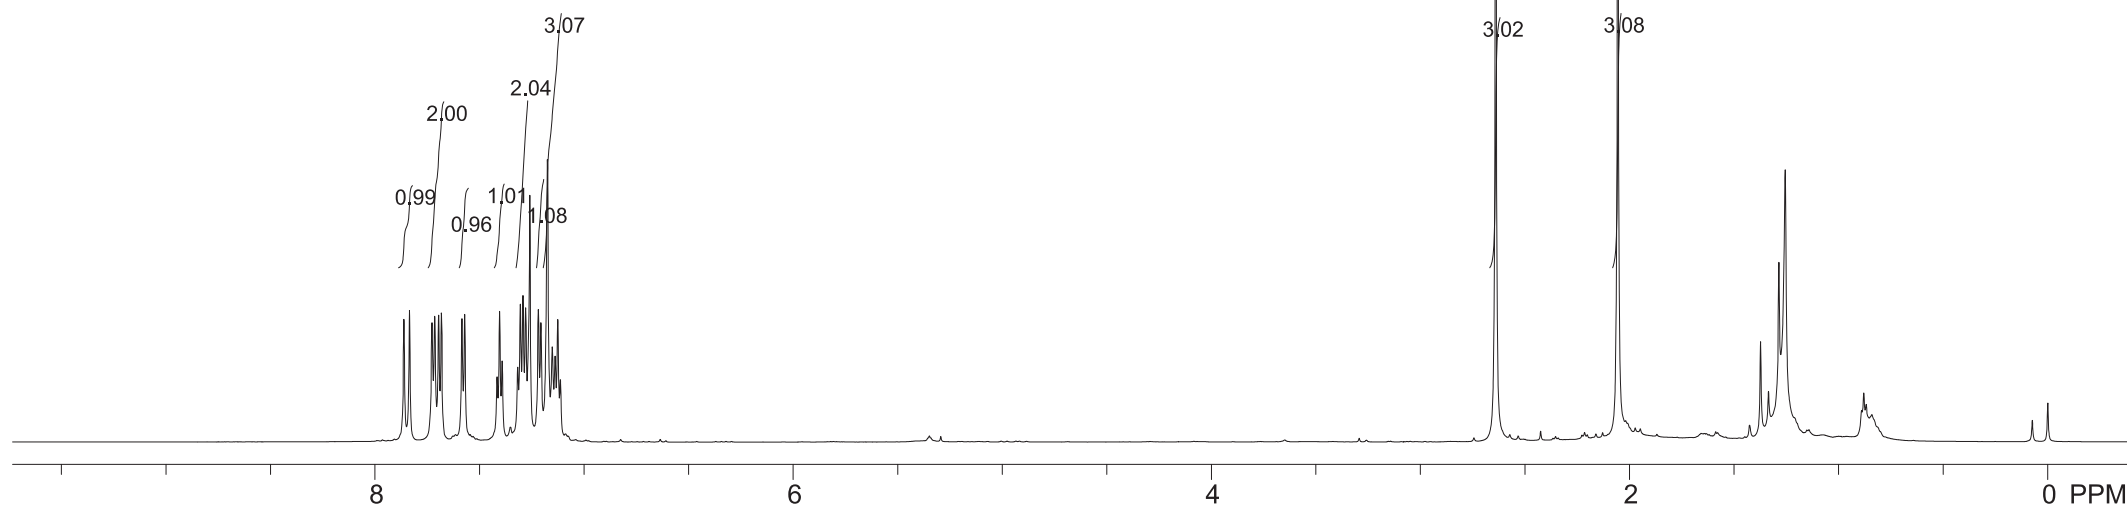

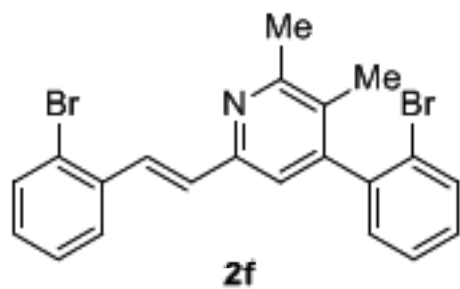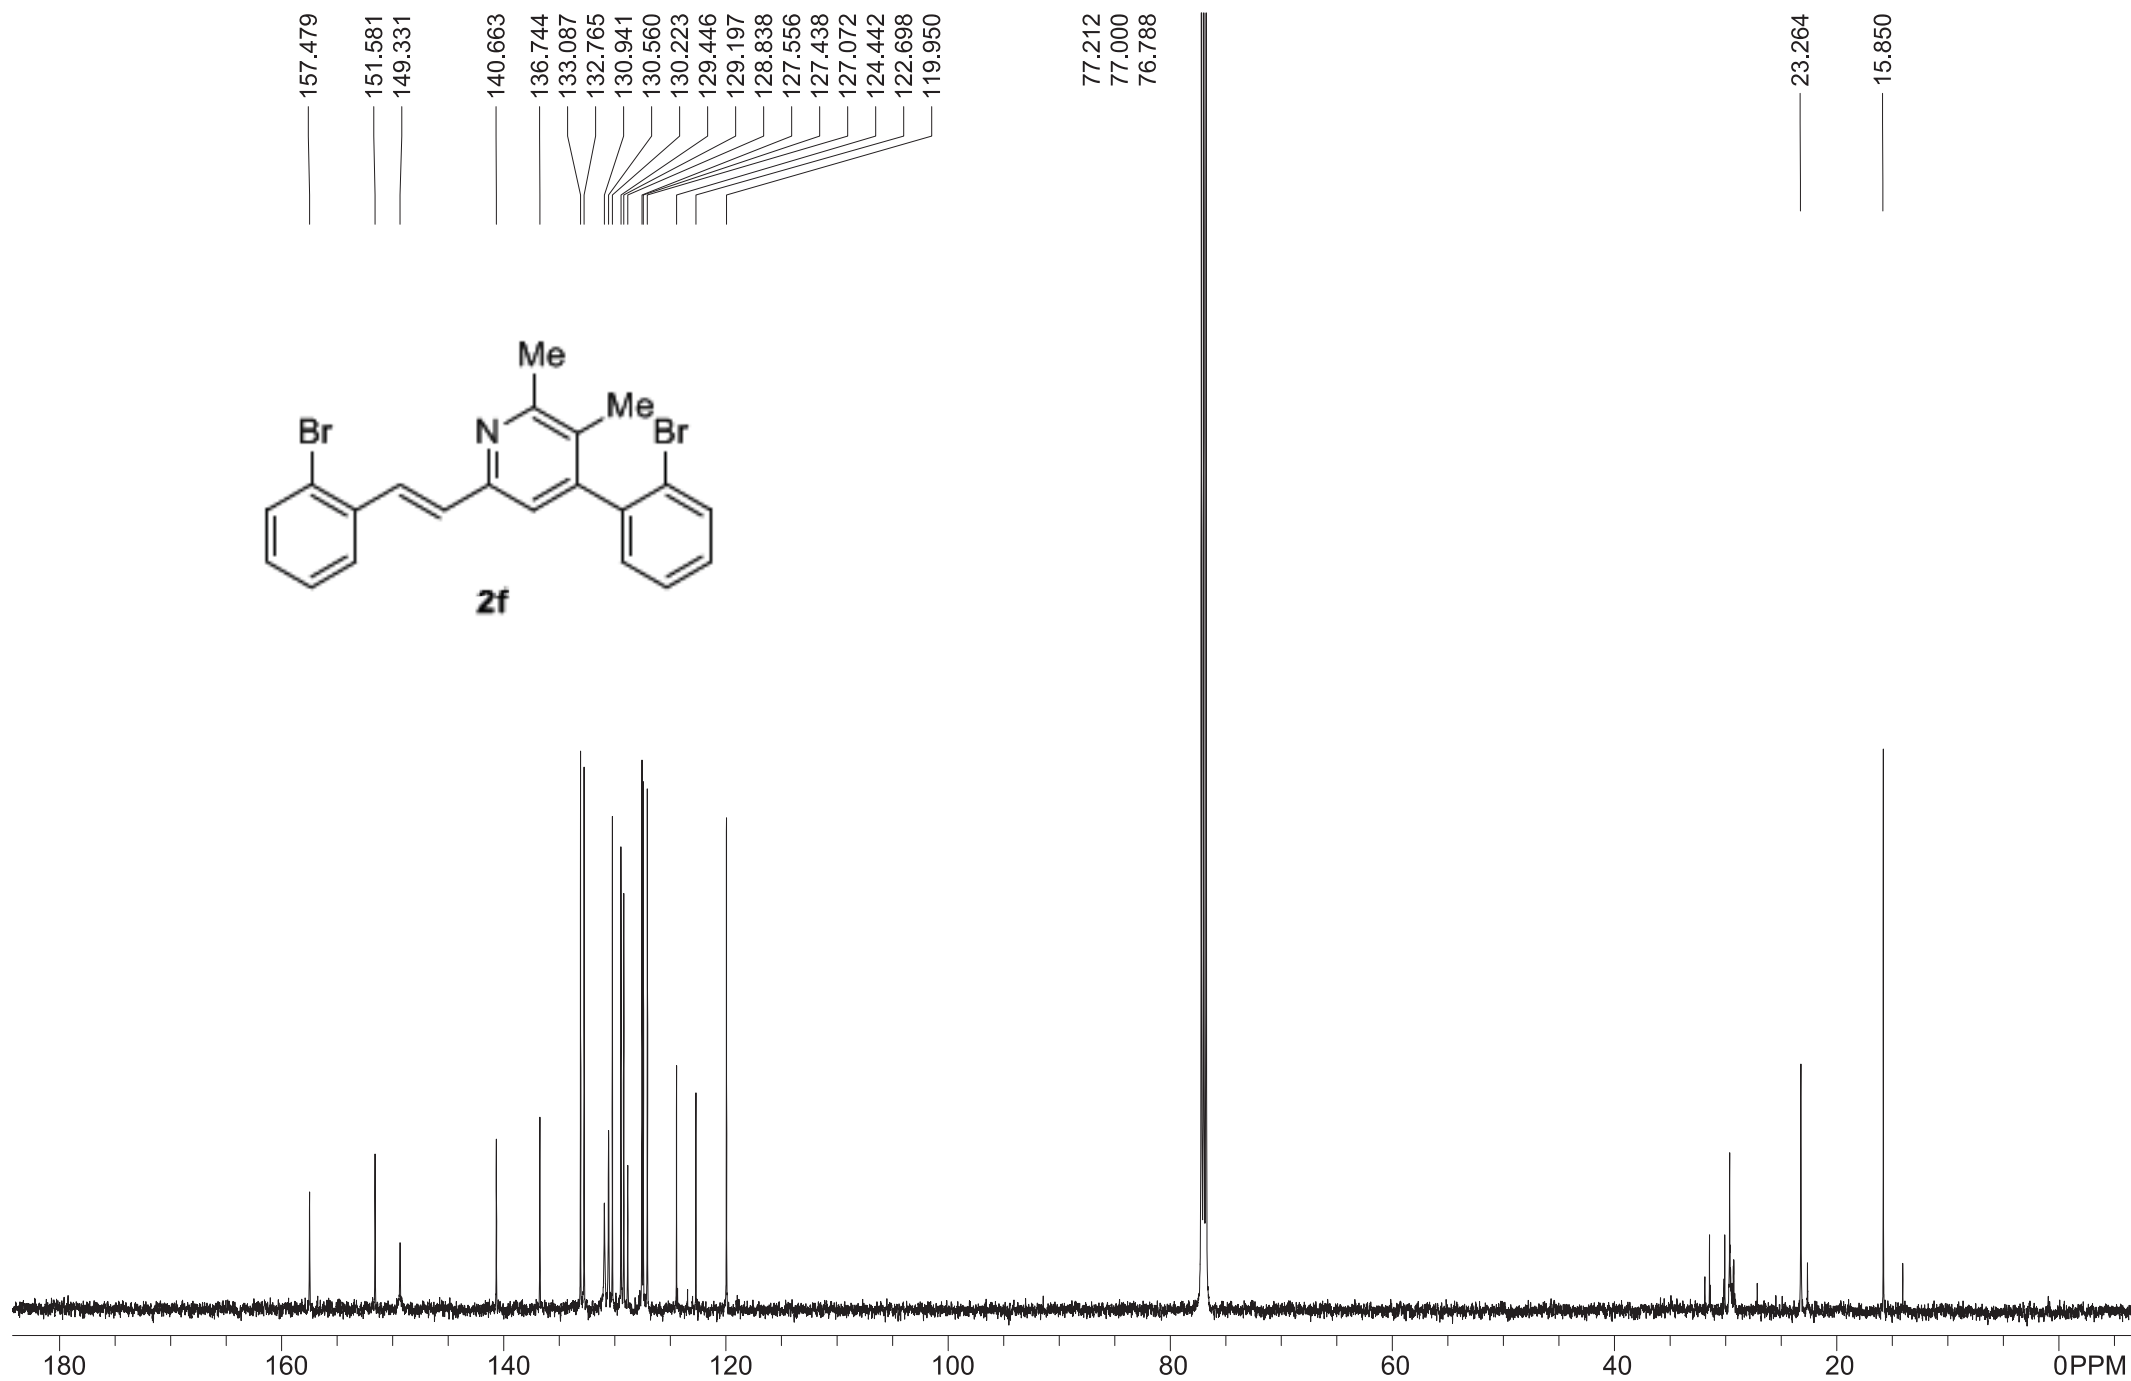

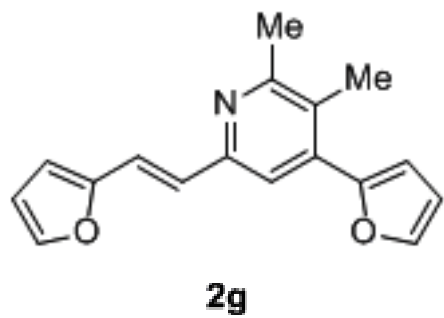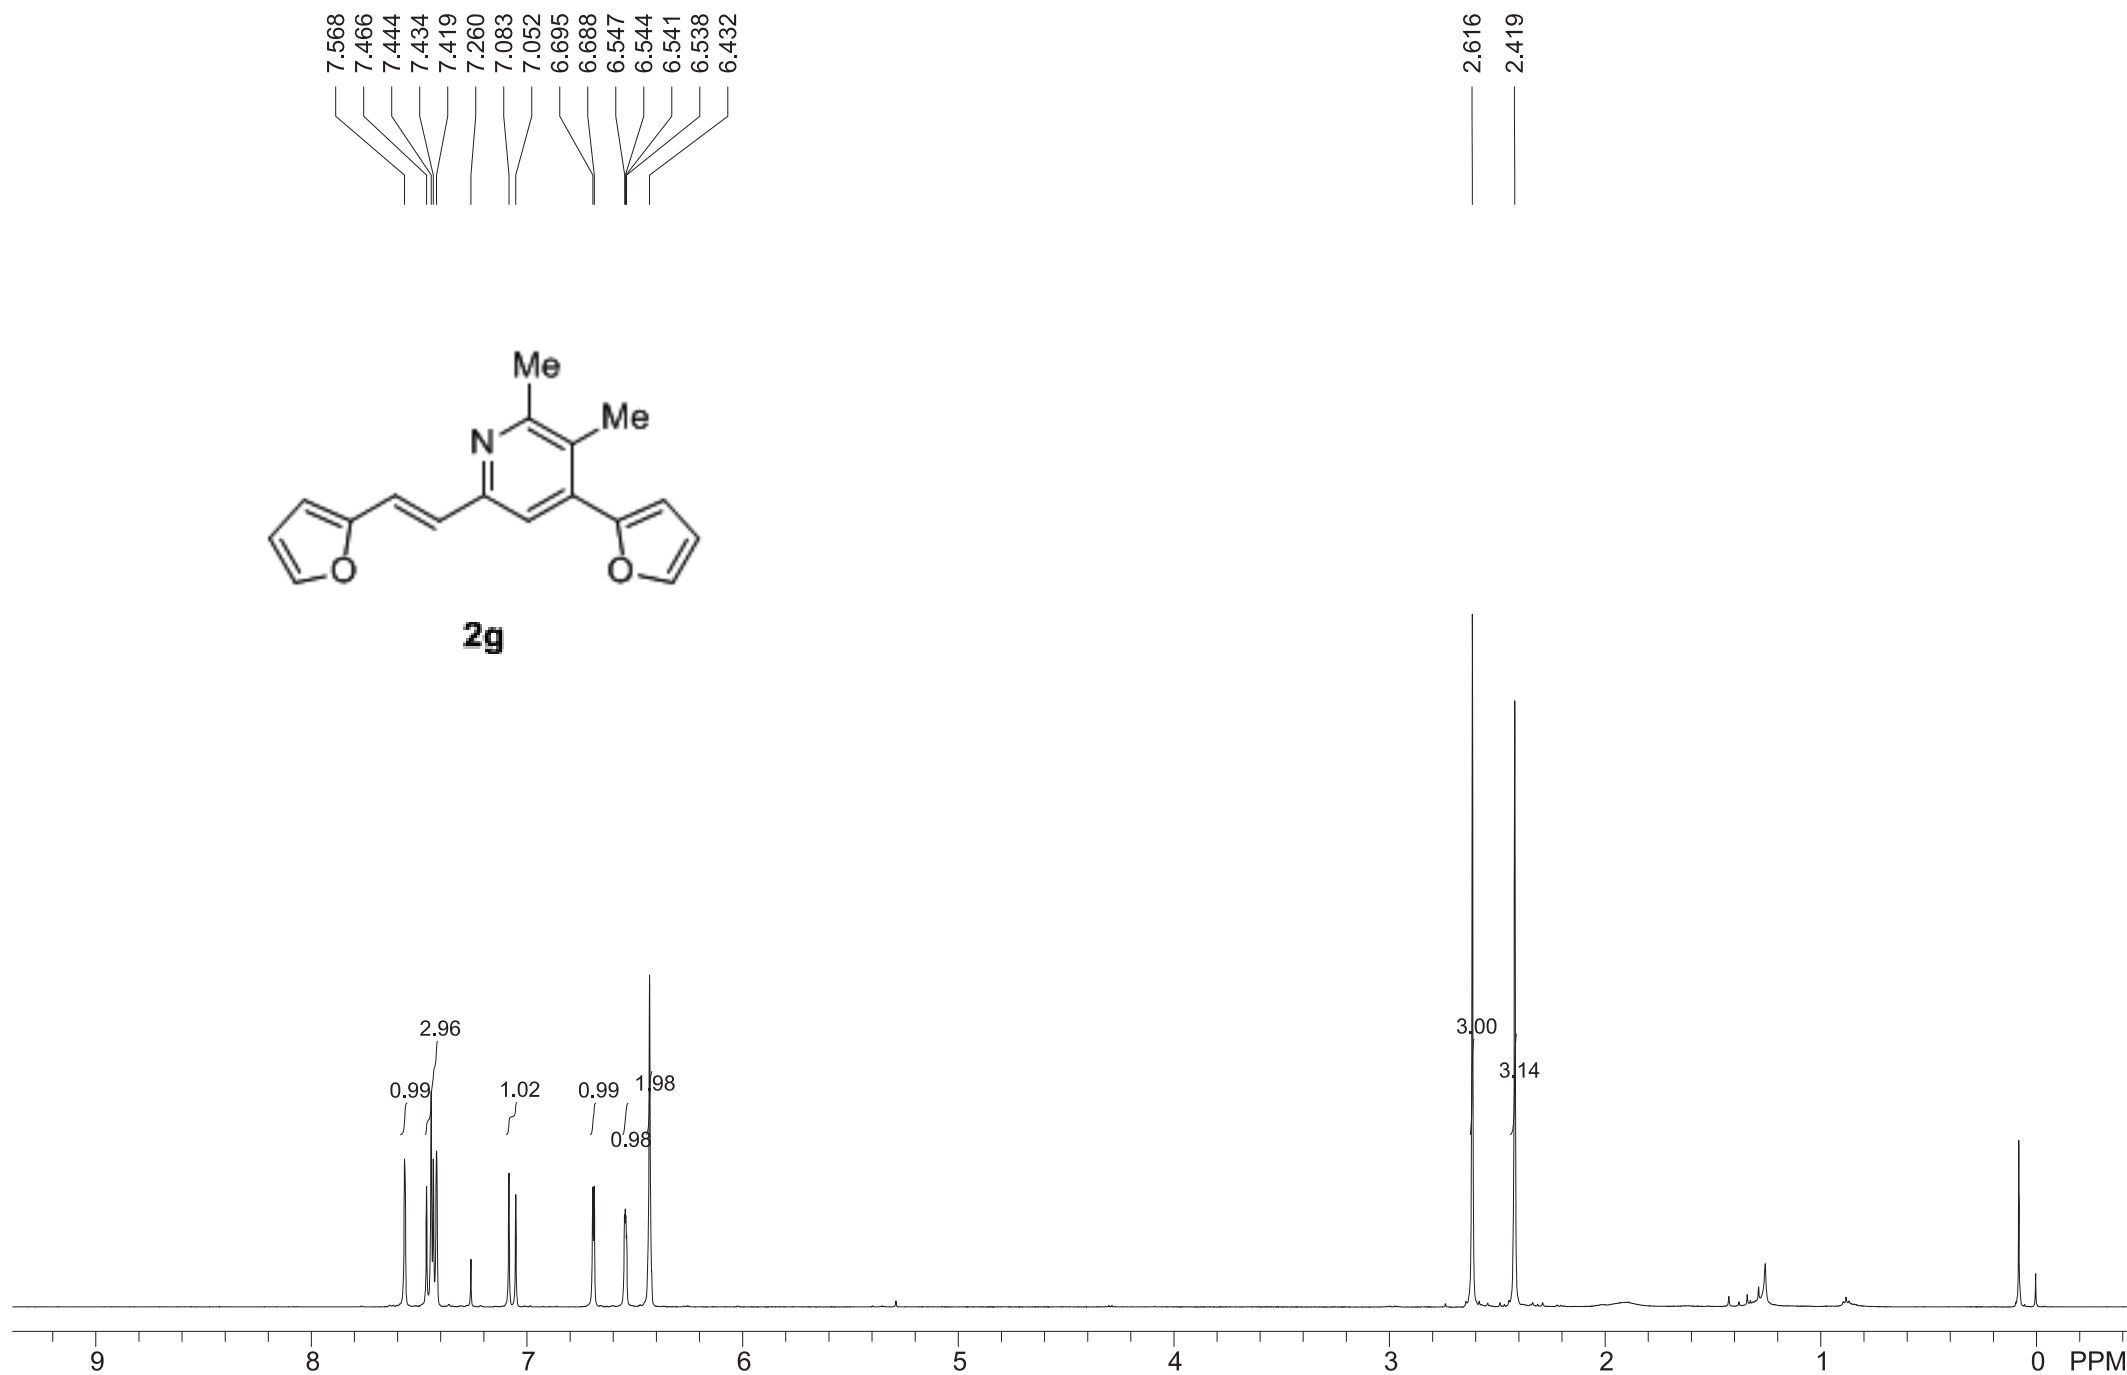

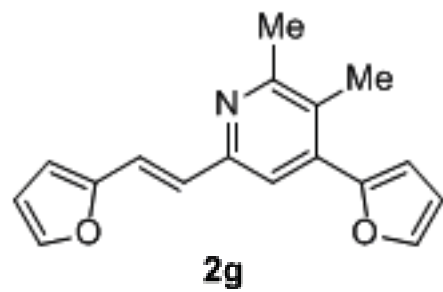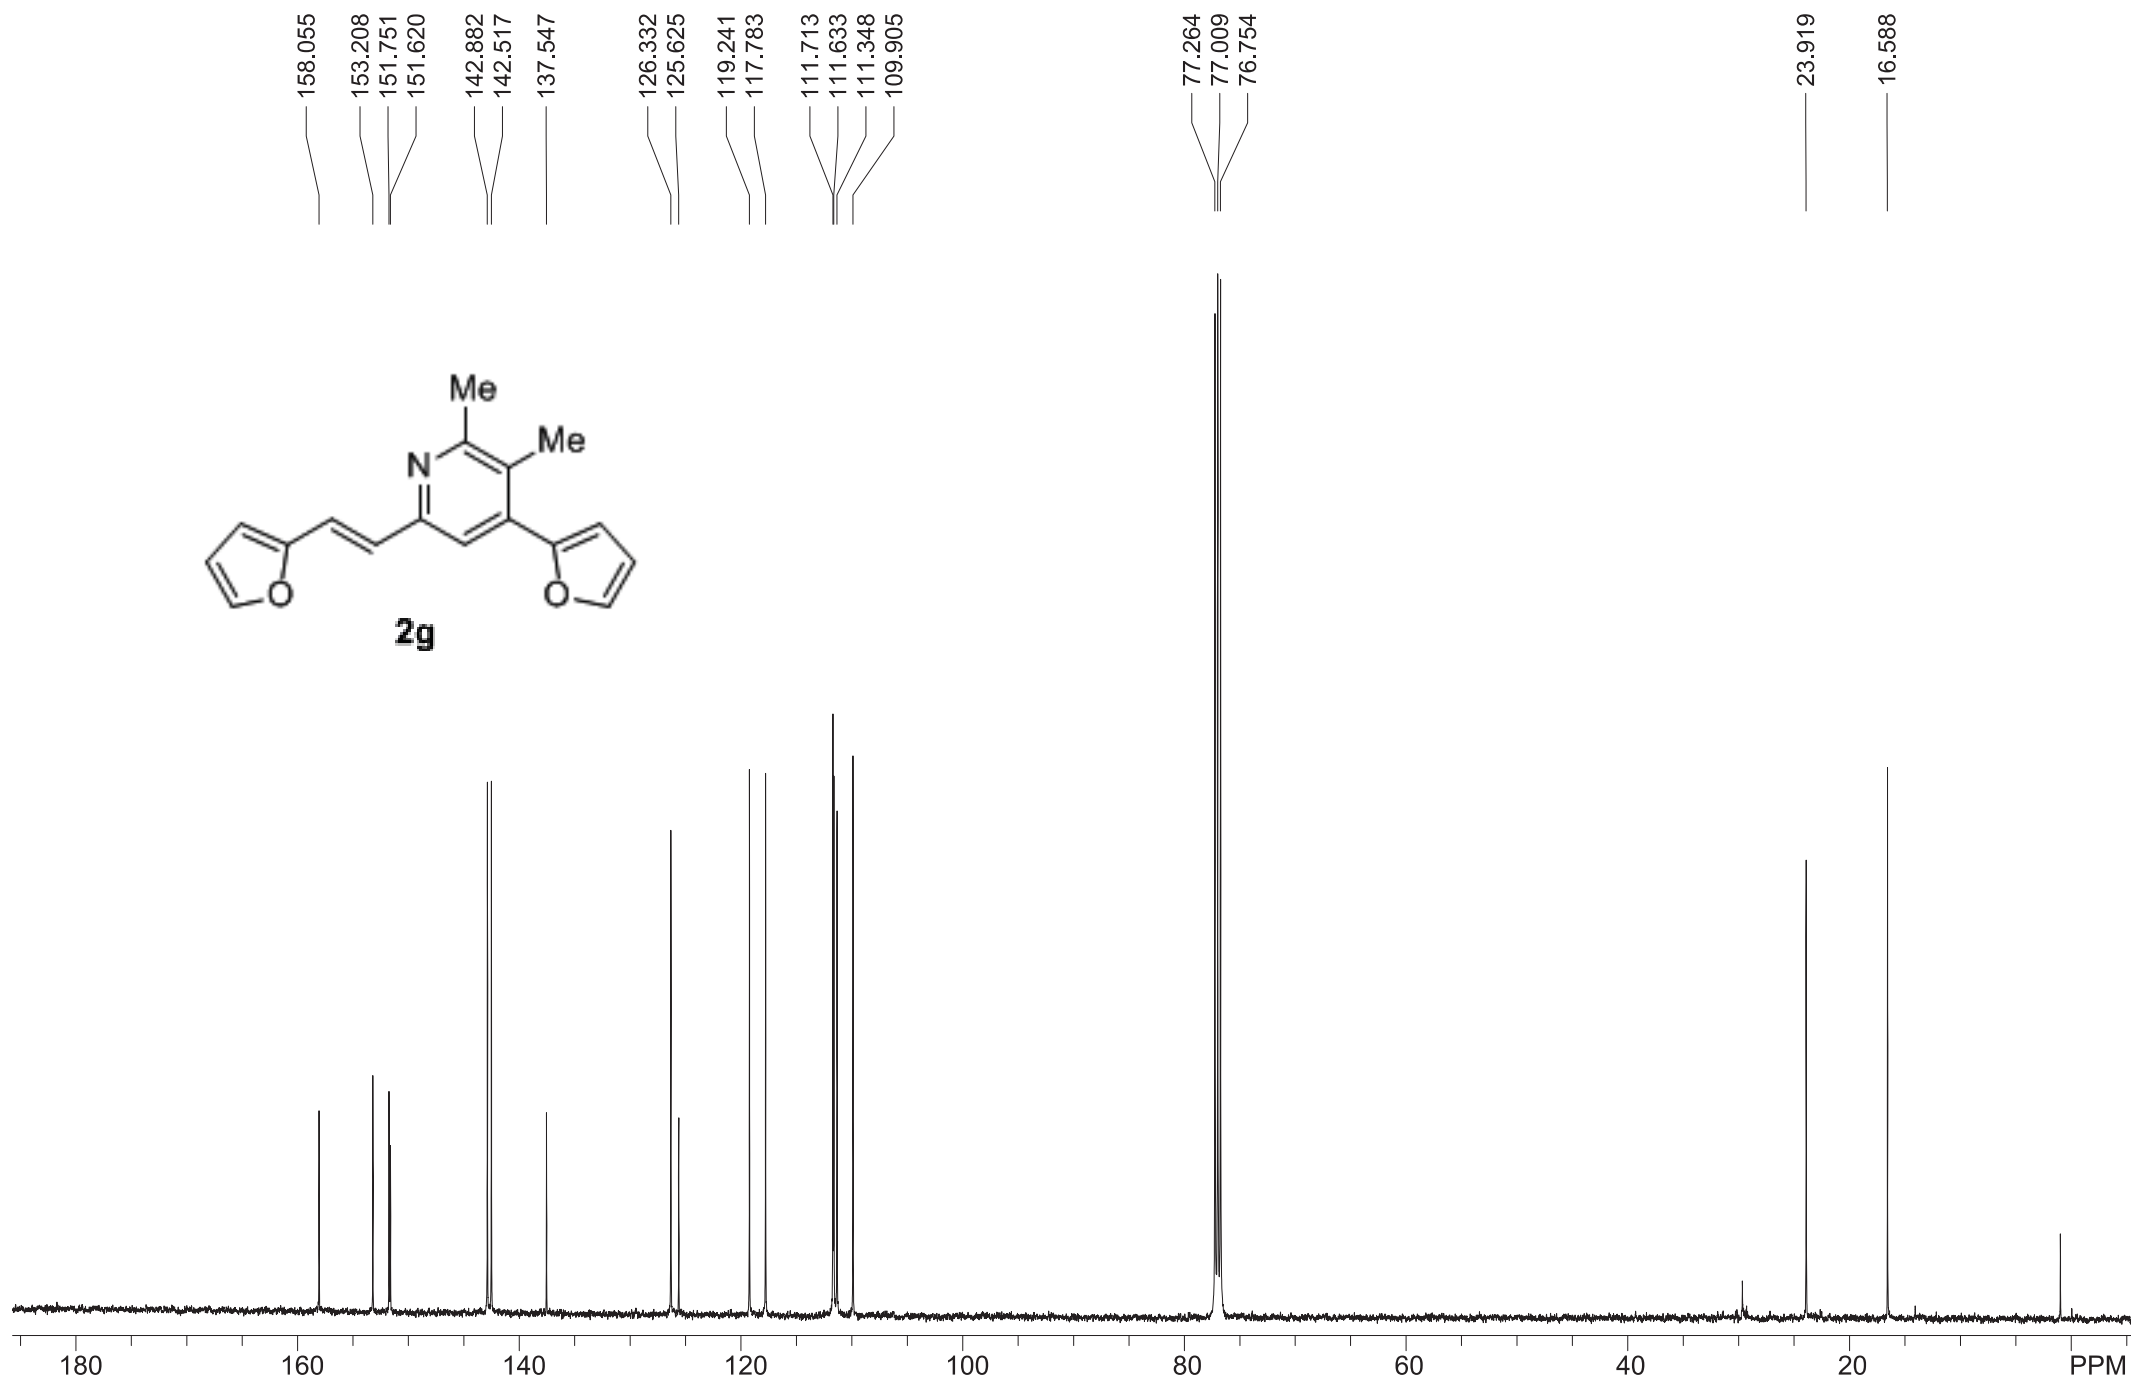



7.748  
7.708  
7.424  
7.416  
7.409  
7.260  
7.225  
7.214  
7.142  
7.133  
7.127  
7.103  
7.021  
7.011  
7.000  
6.982  
6.942

2.614  
2.352

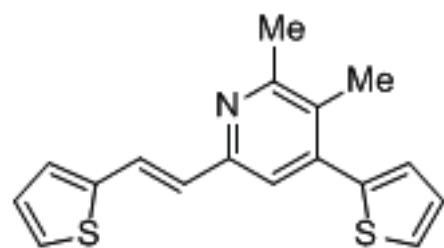

**2h**

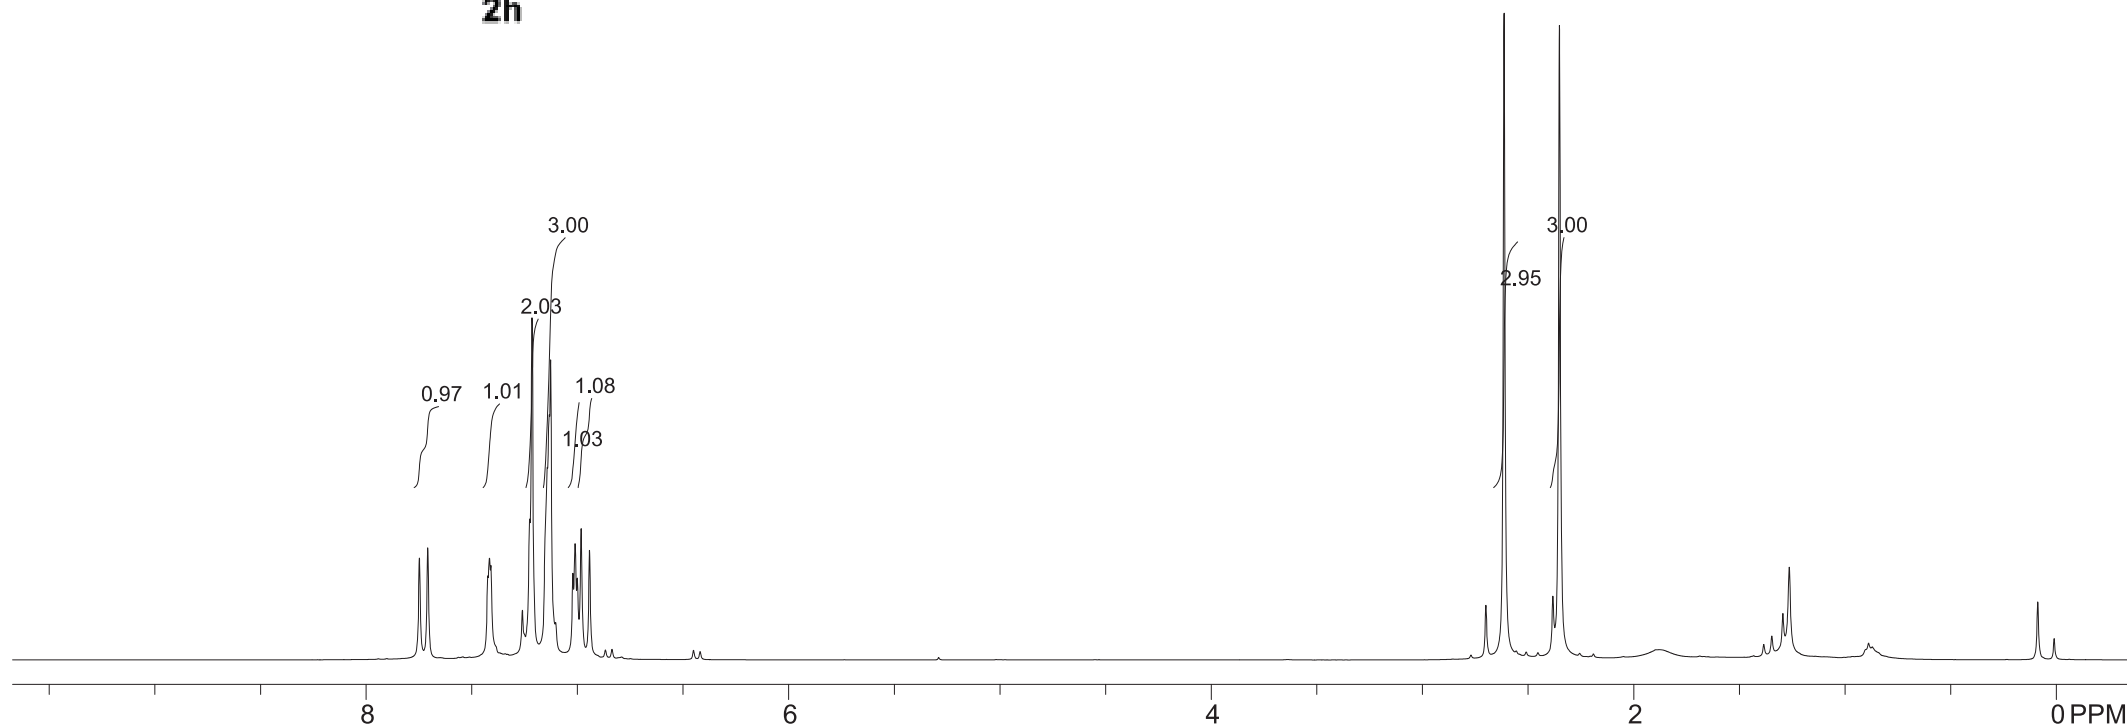

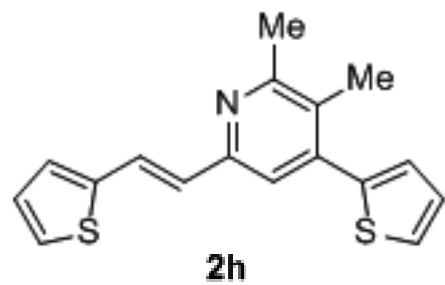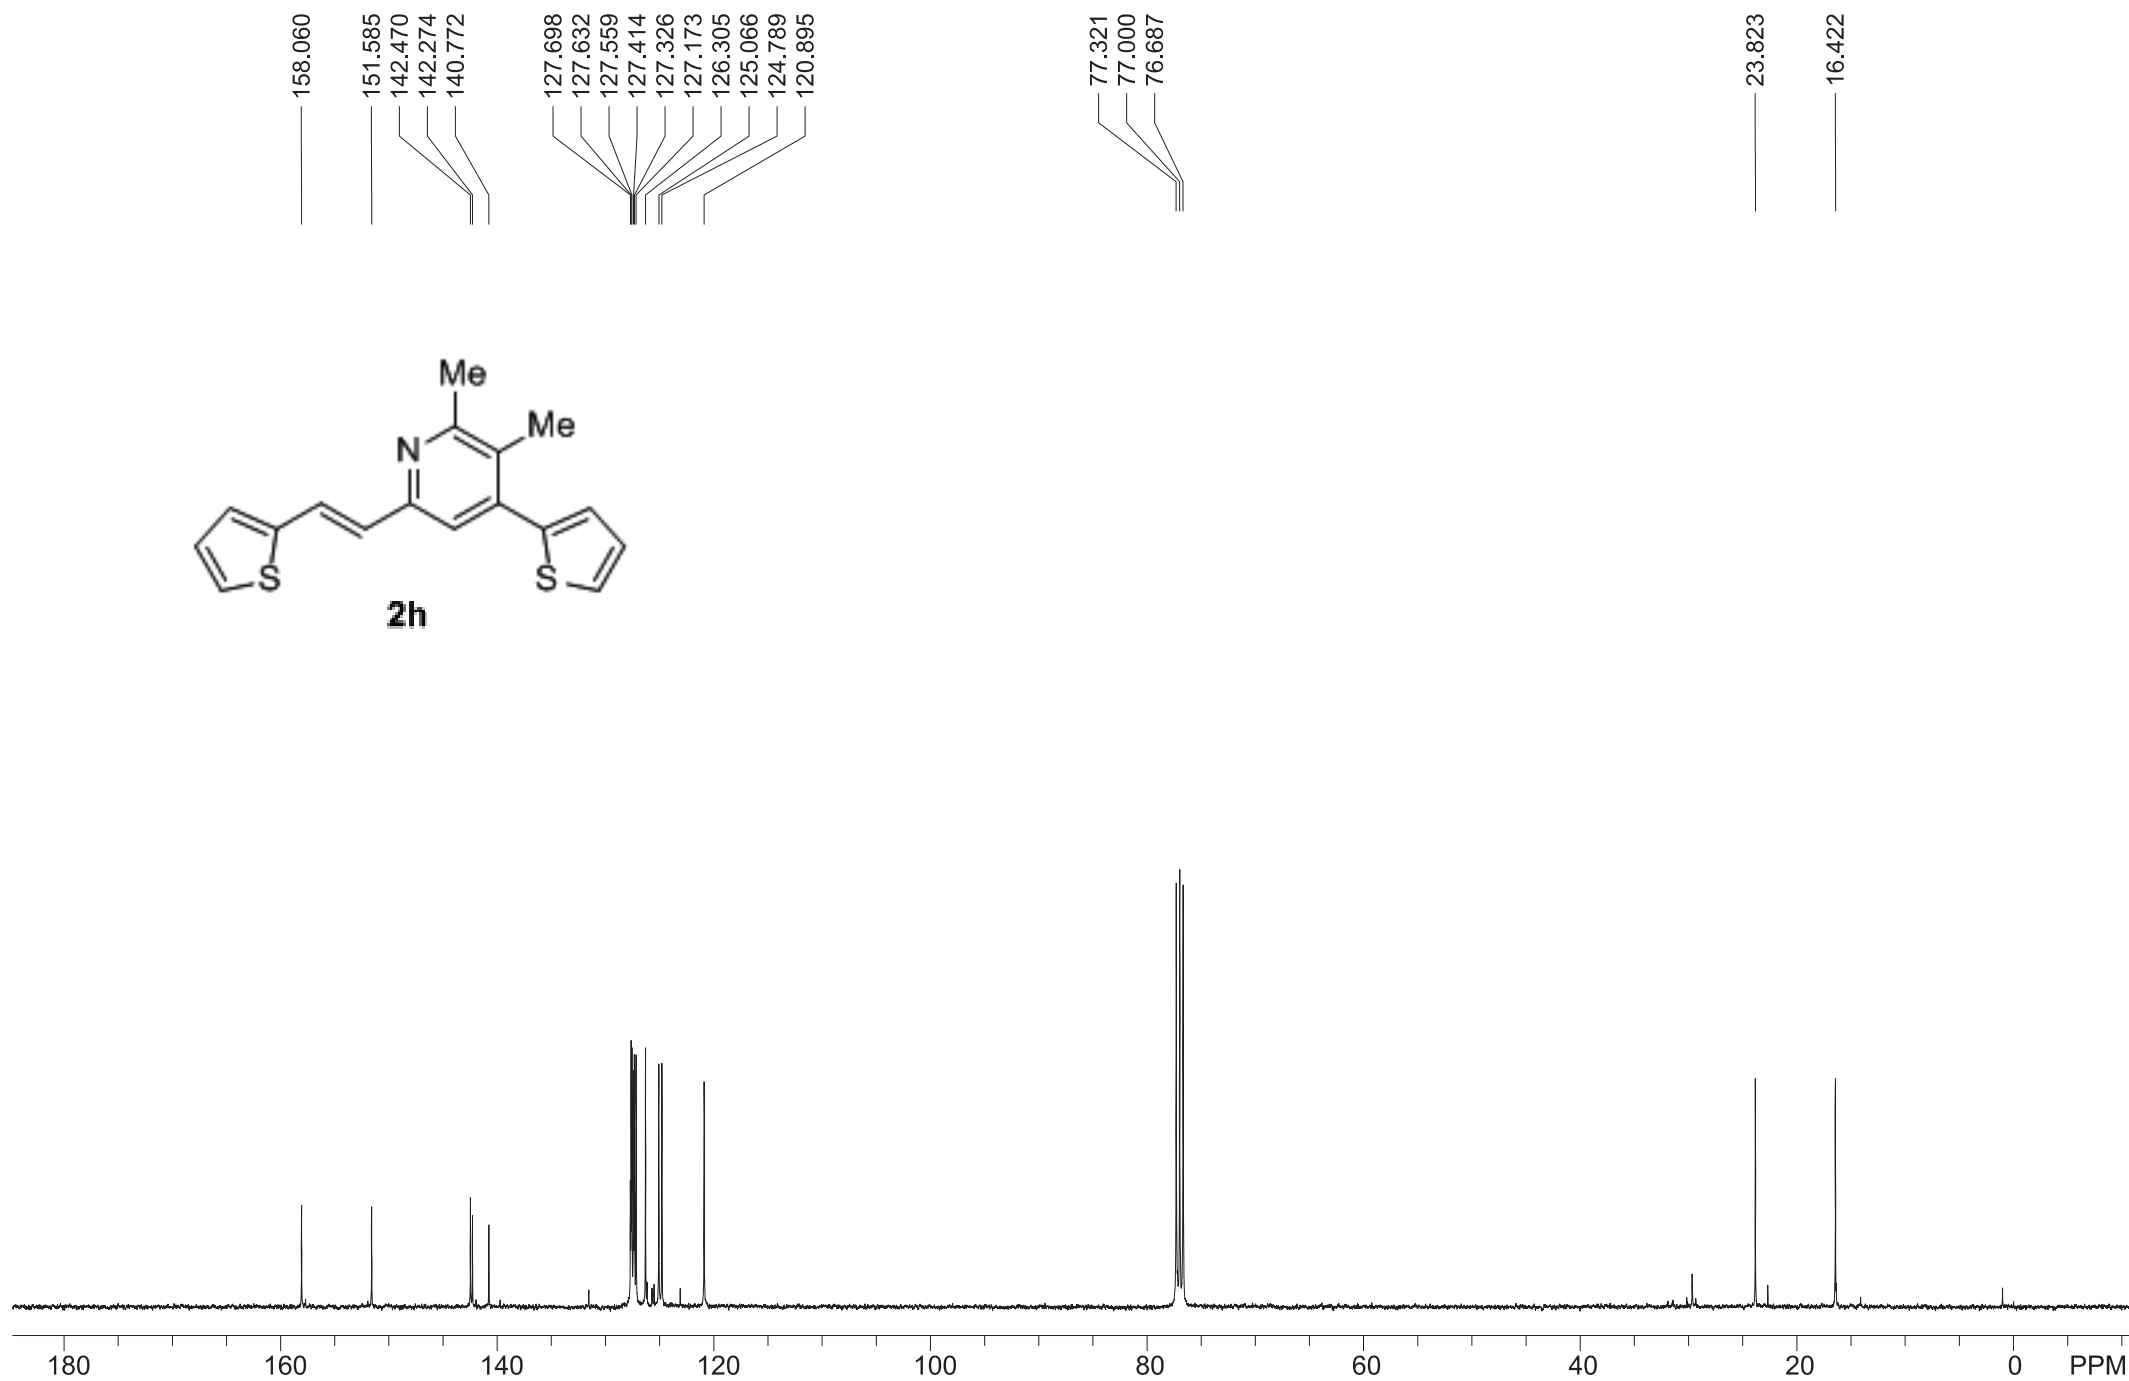

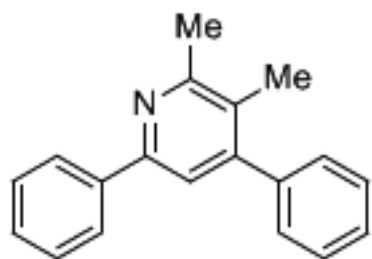

8.009  
7.996  
7.482  
7.470  
7.464  
7.452  
7.438  
7.429  
7.416  
7.391  
7.379  
7.357  
7.344  
7.260

2.682  
2.231

9.10

2.00

3.07

3.08

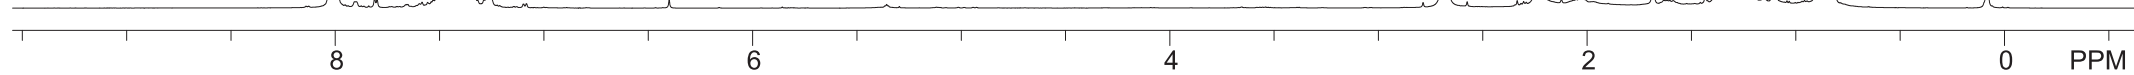

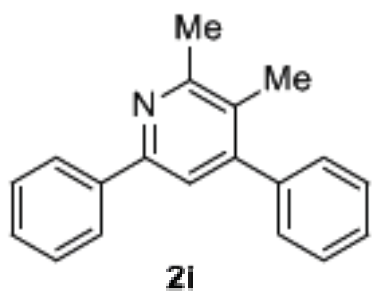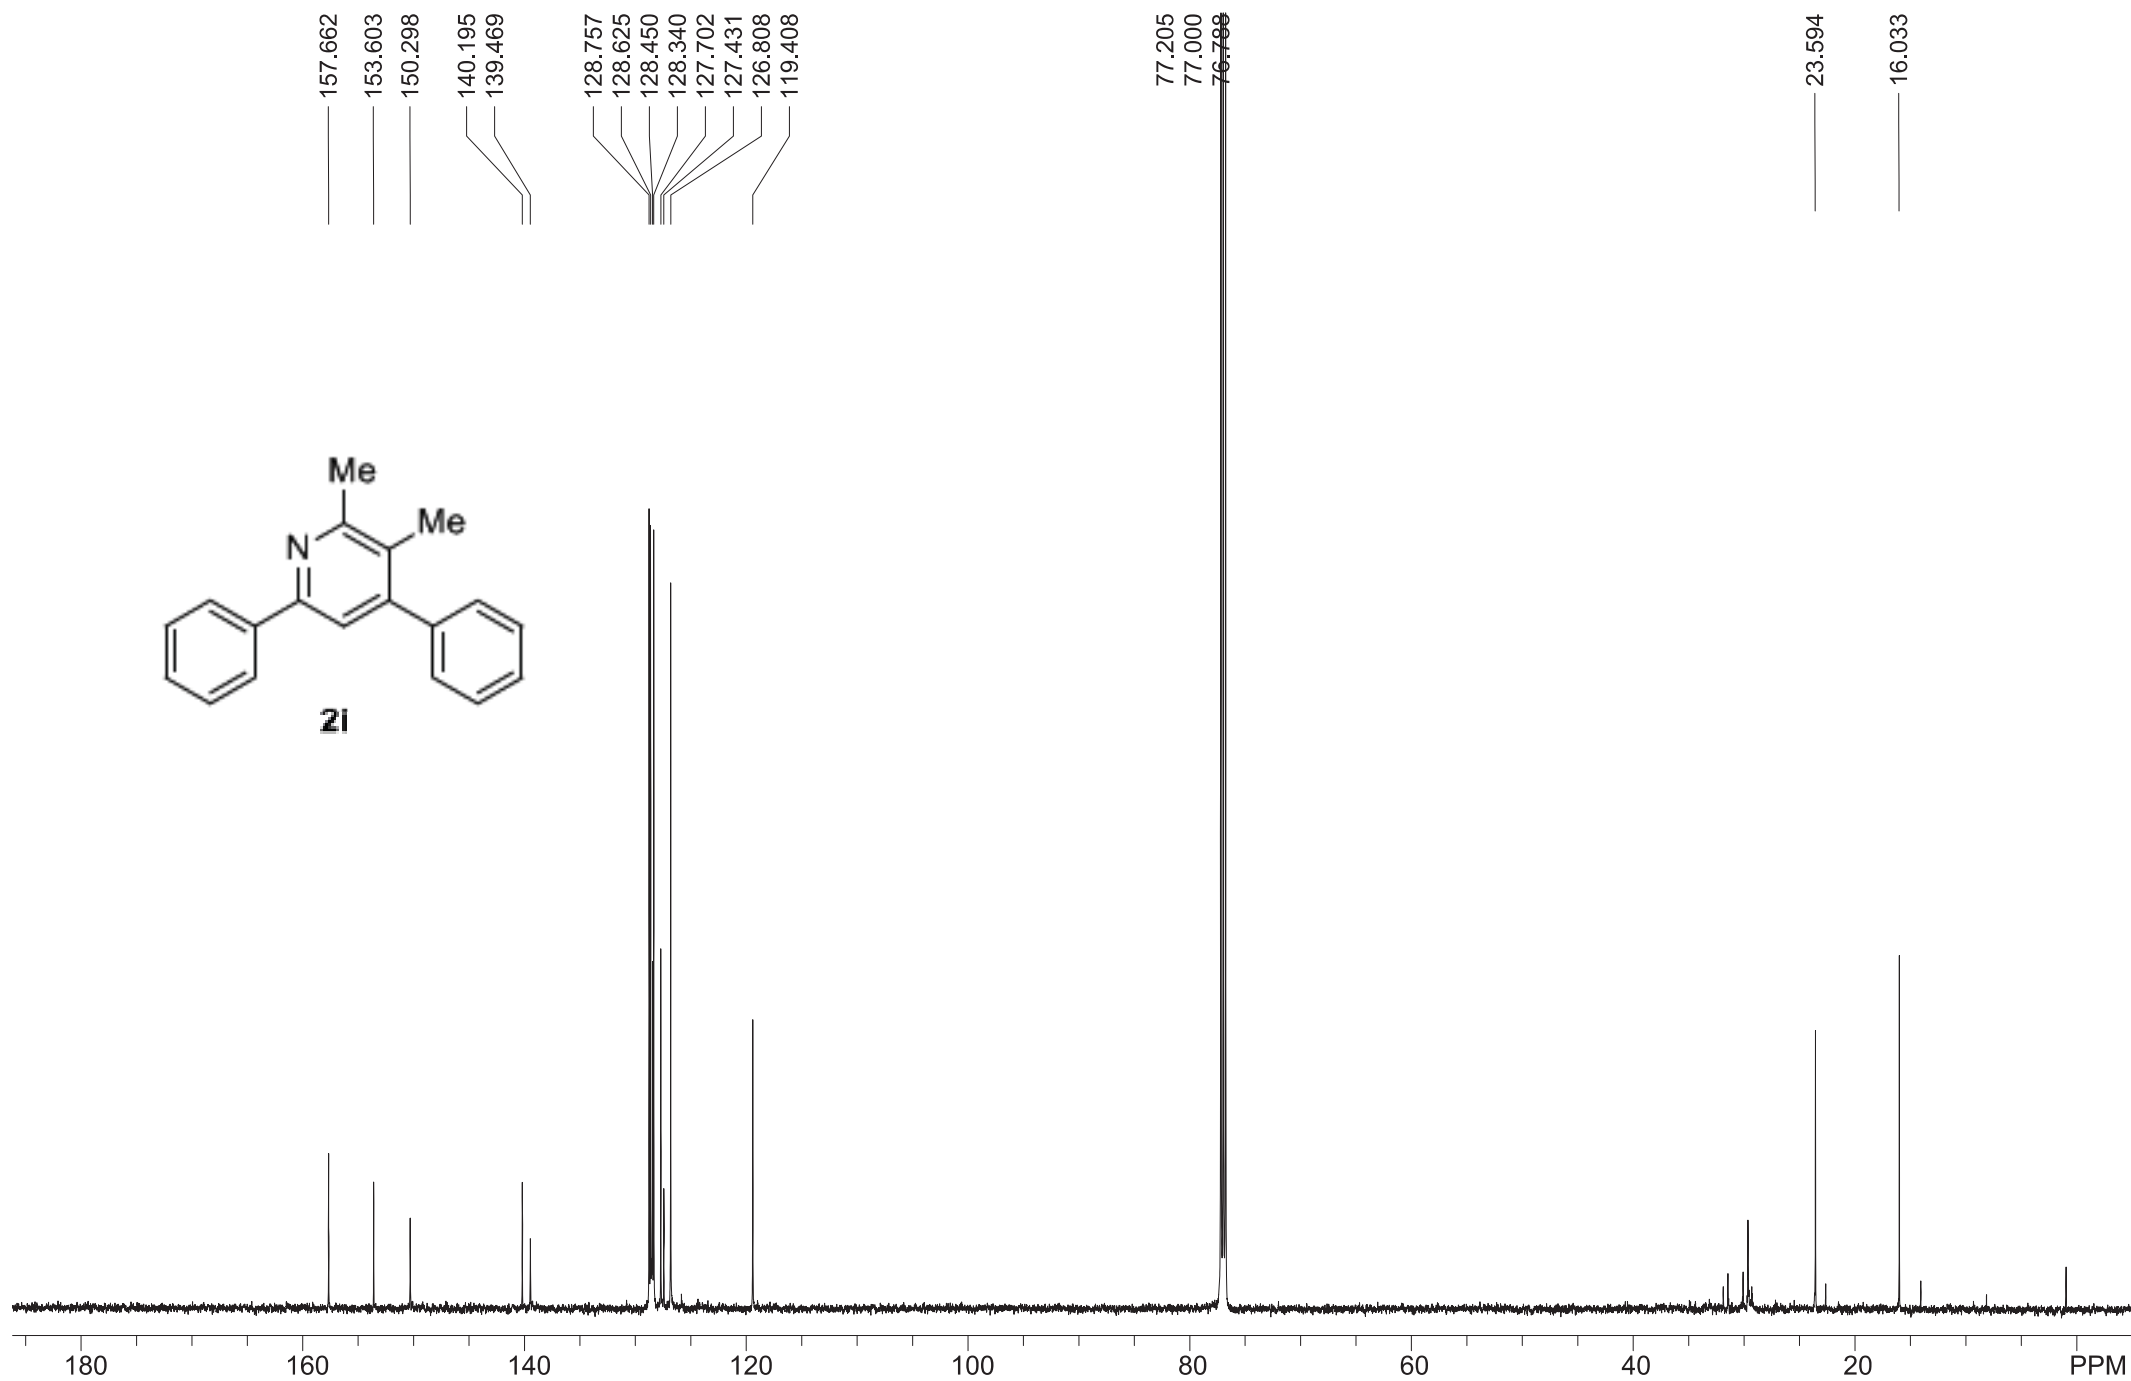

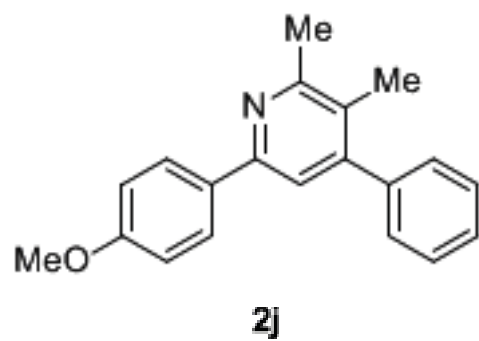

7.967  
7.963  
7.956  
7.952  
7.475  
7.464  
7.451  
7.421  
7.409  
7.389  
7.351  
7.349  
7.337  
7.260  
6.984  
6.981  
6.973  
6.970

3.852

2.661

2.209

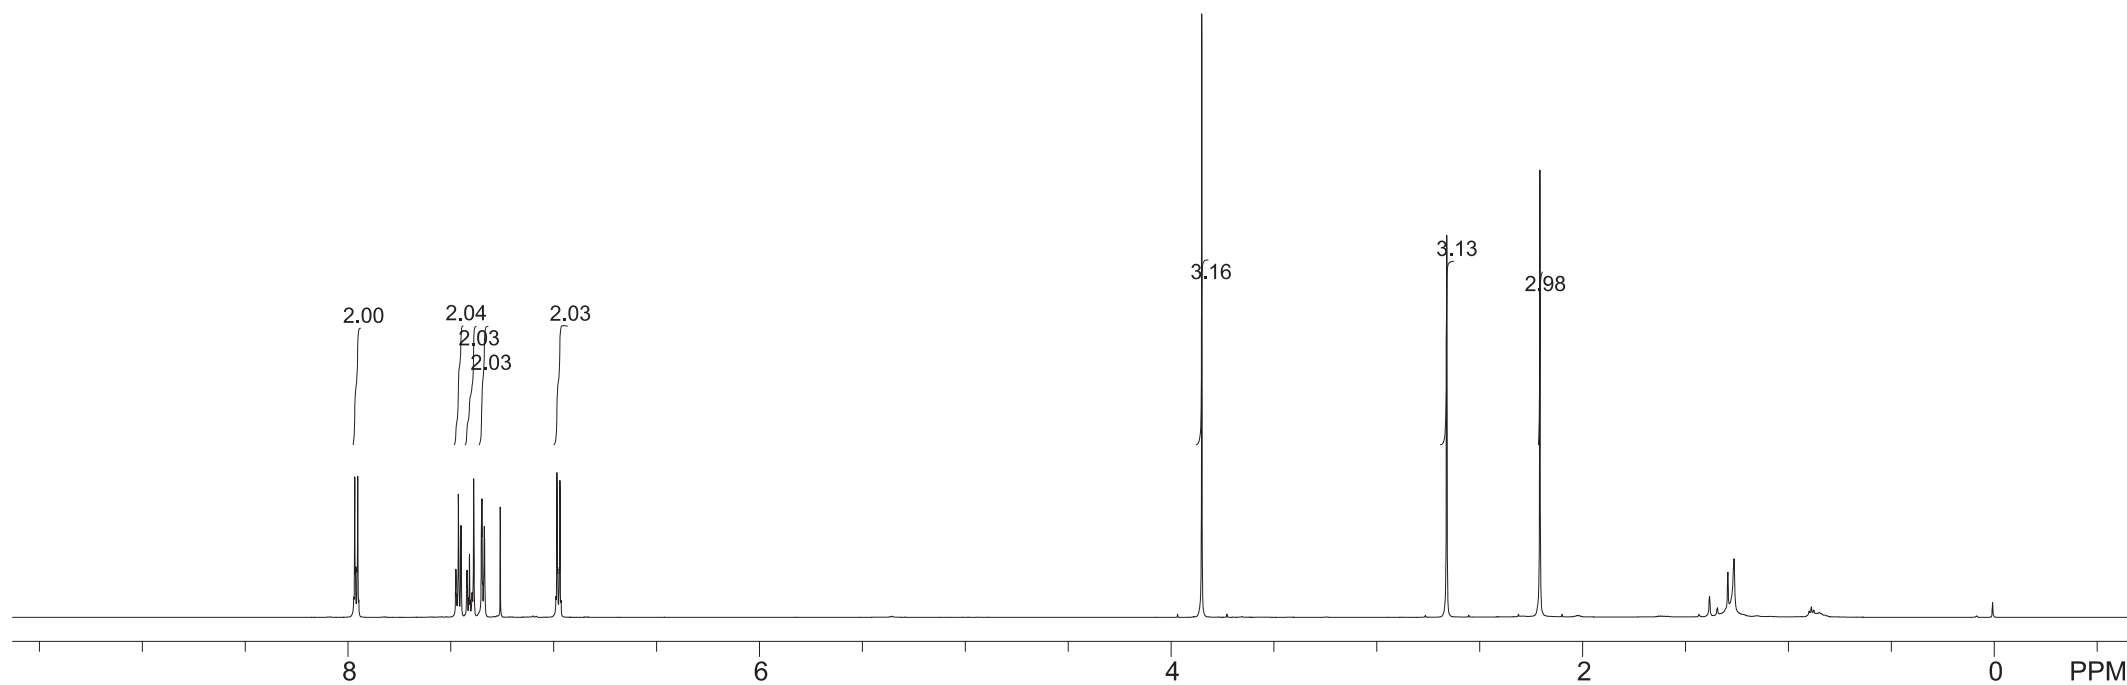

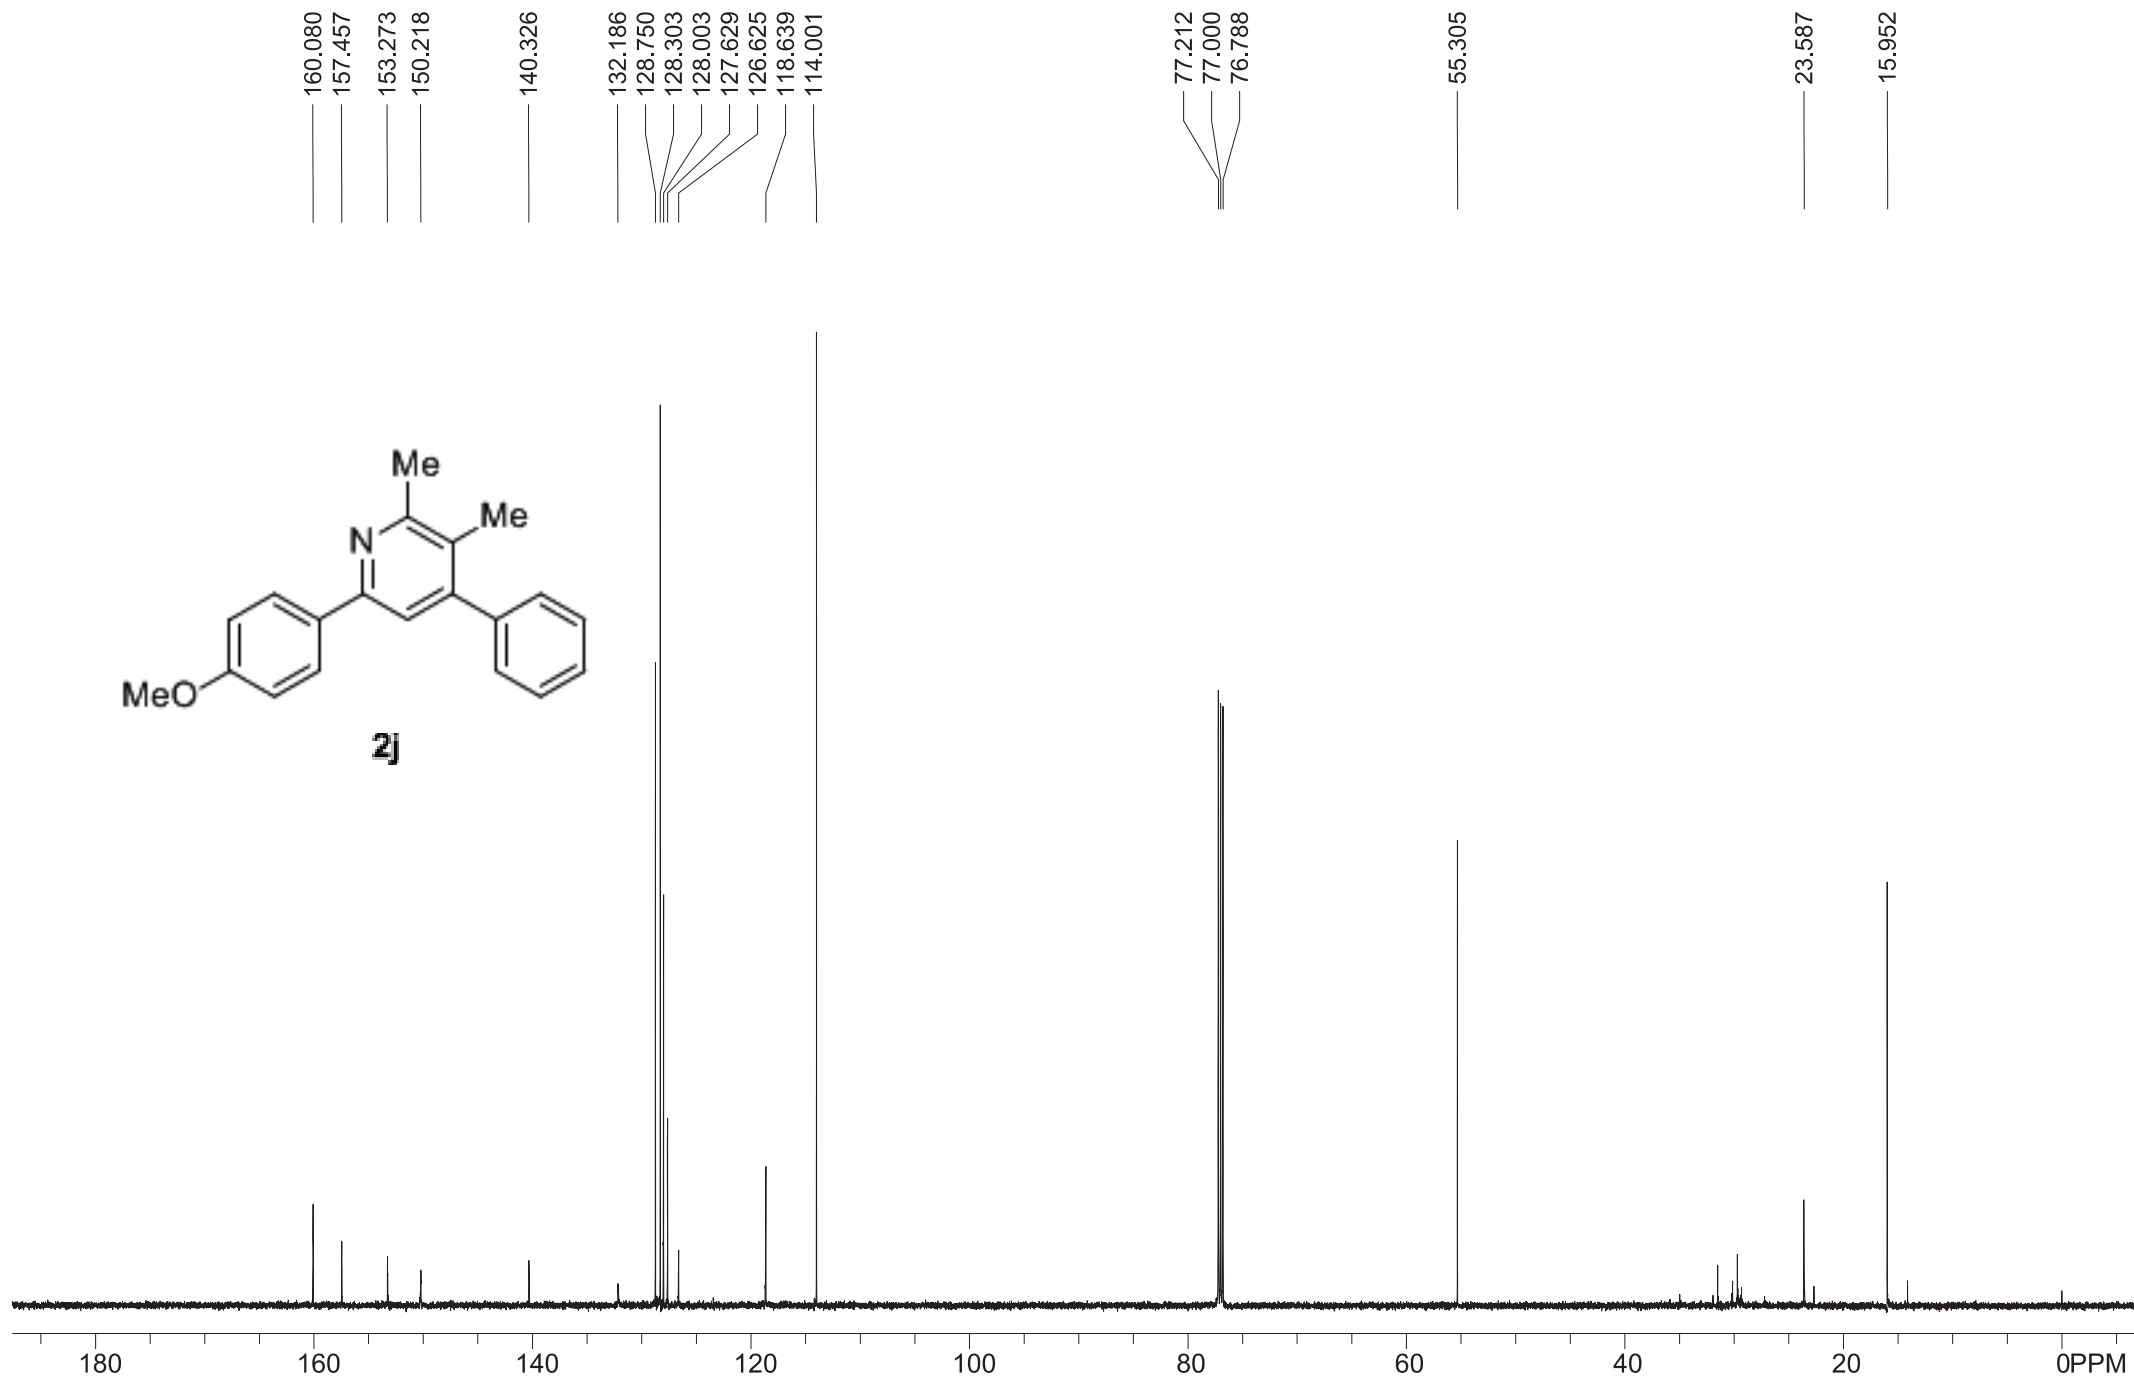

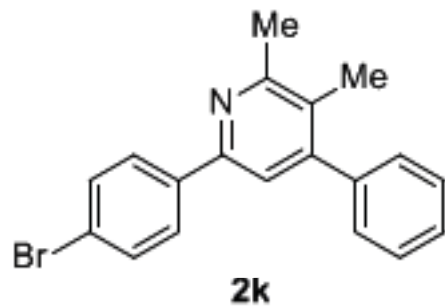

7.902  
7.897  
7.885  
7.880  
7.574  
7.569  
7.558  
7.553  
7.486  
7.469  
7.465  
7.454  
7.451  
7.433  
7.429  
7.415  
7.345  
7.341  
7.329  
7.325  
7.321  
7.260

2.656  
2.219

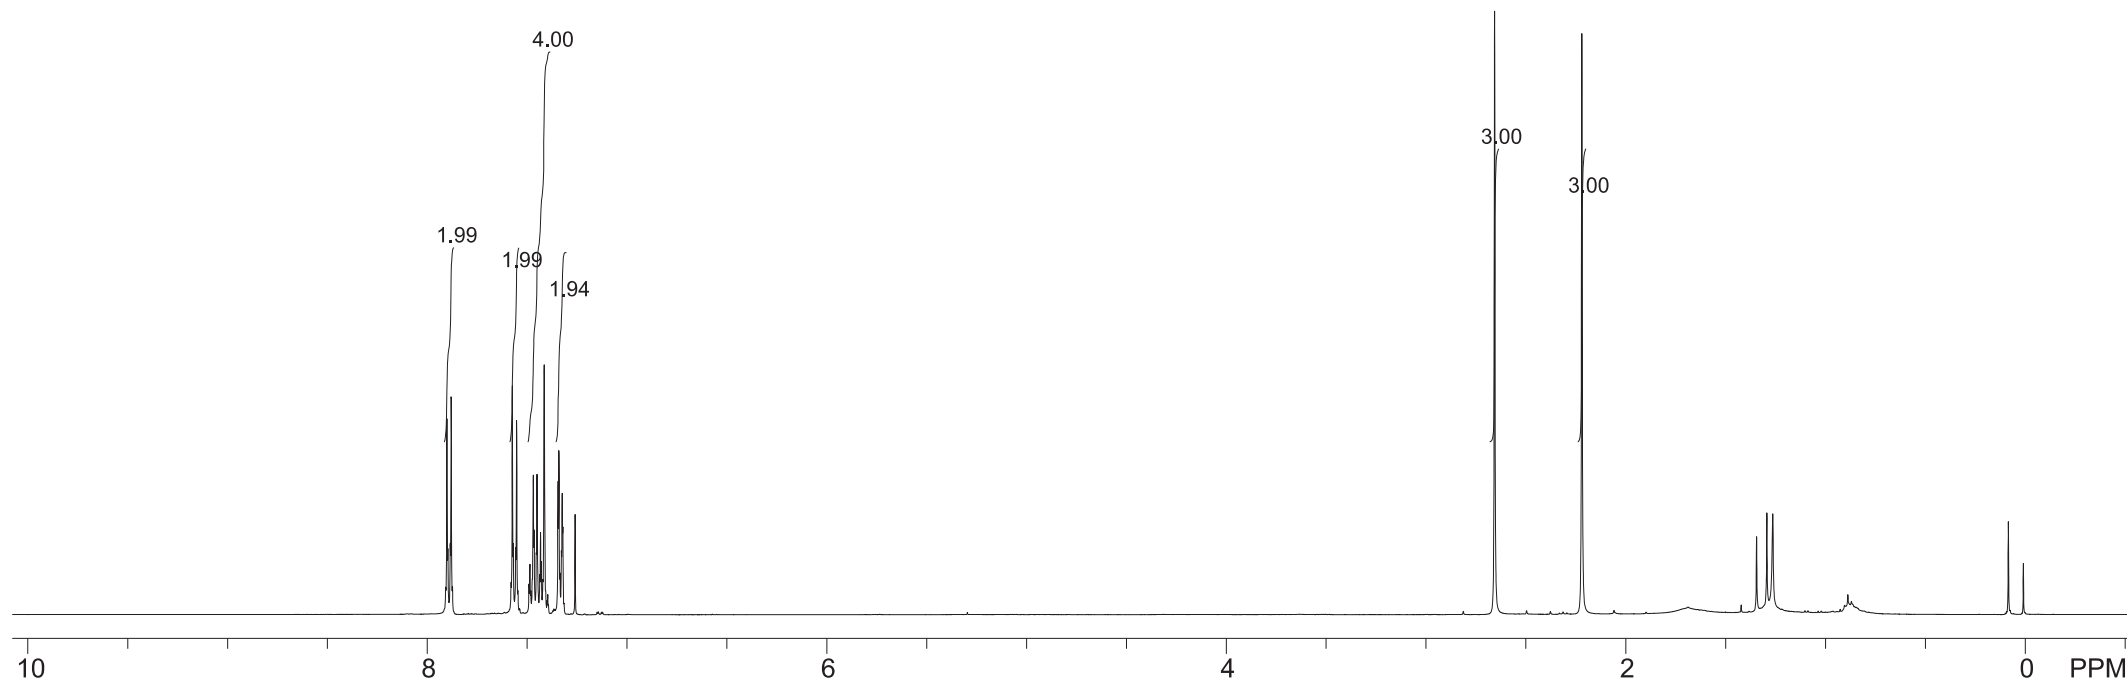

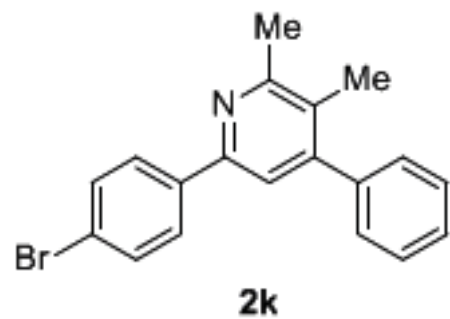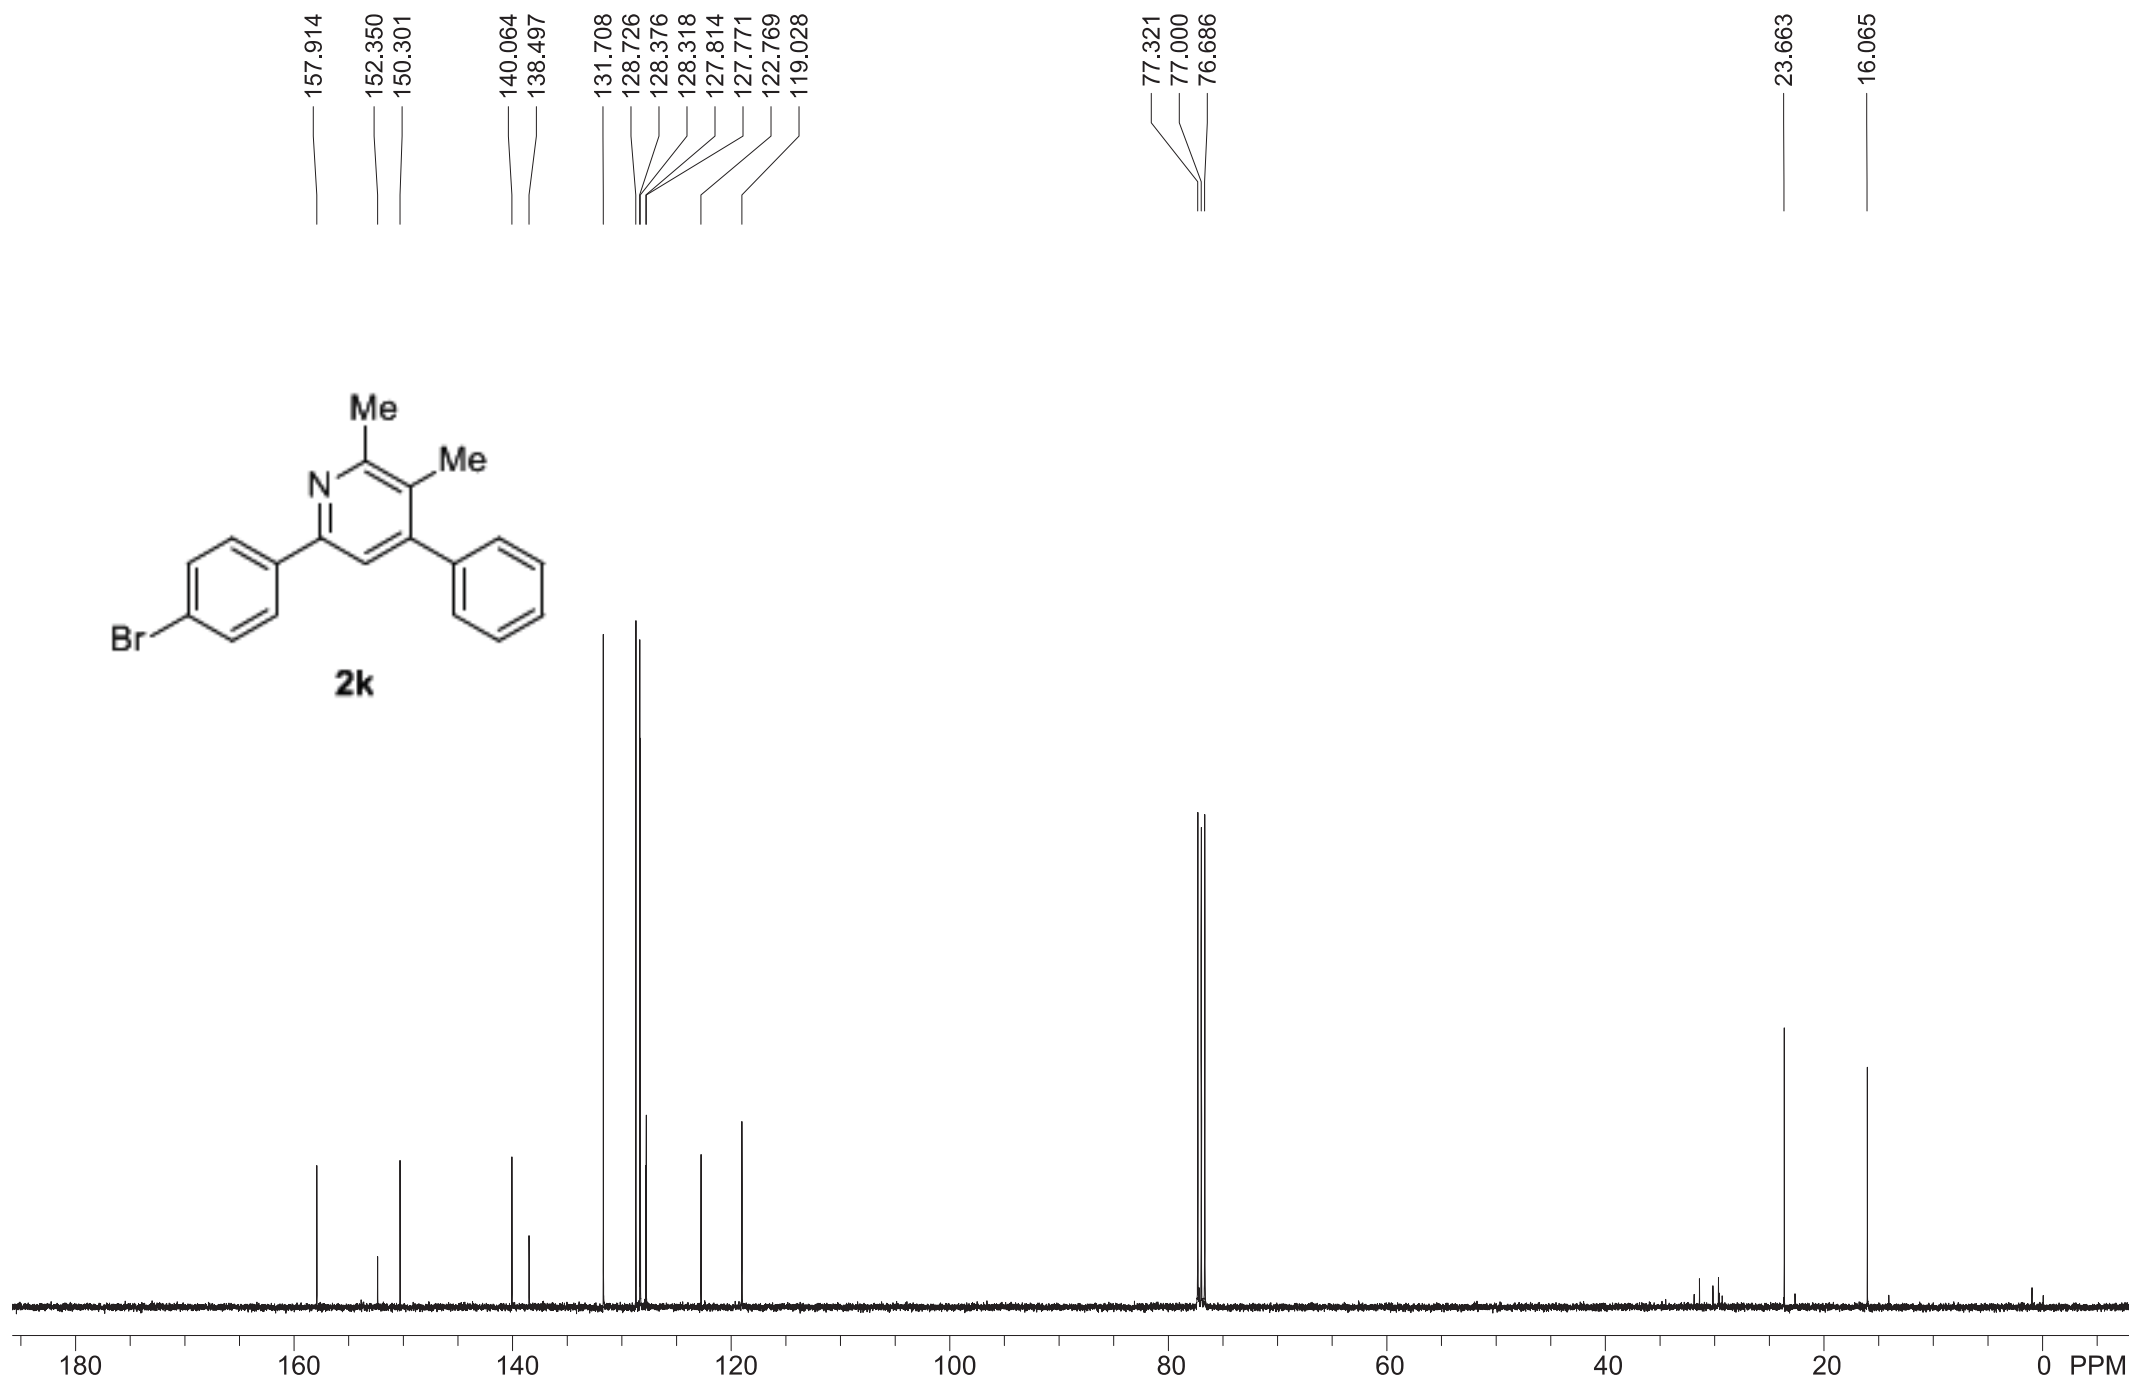



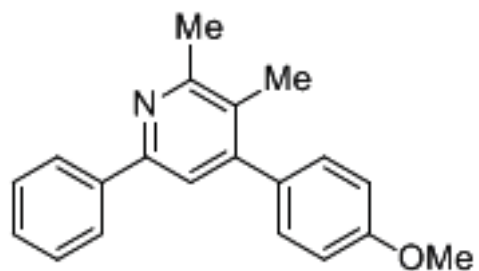

**2I**

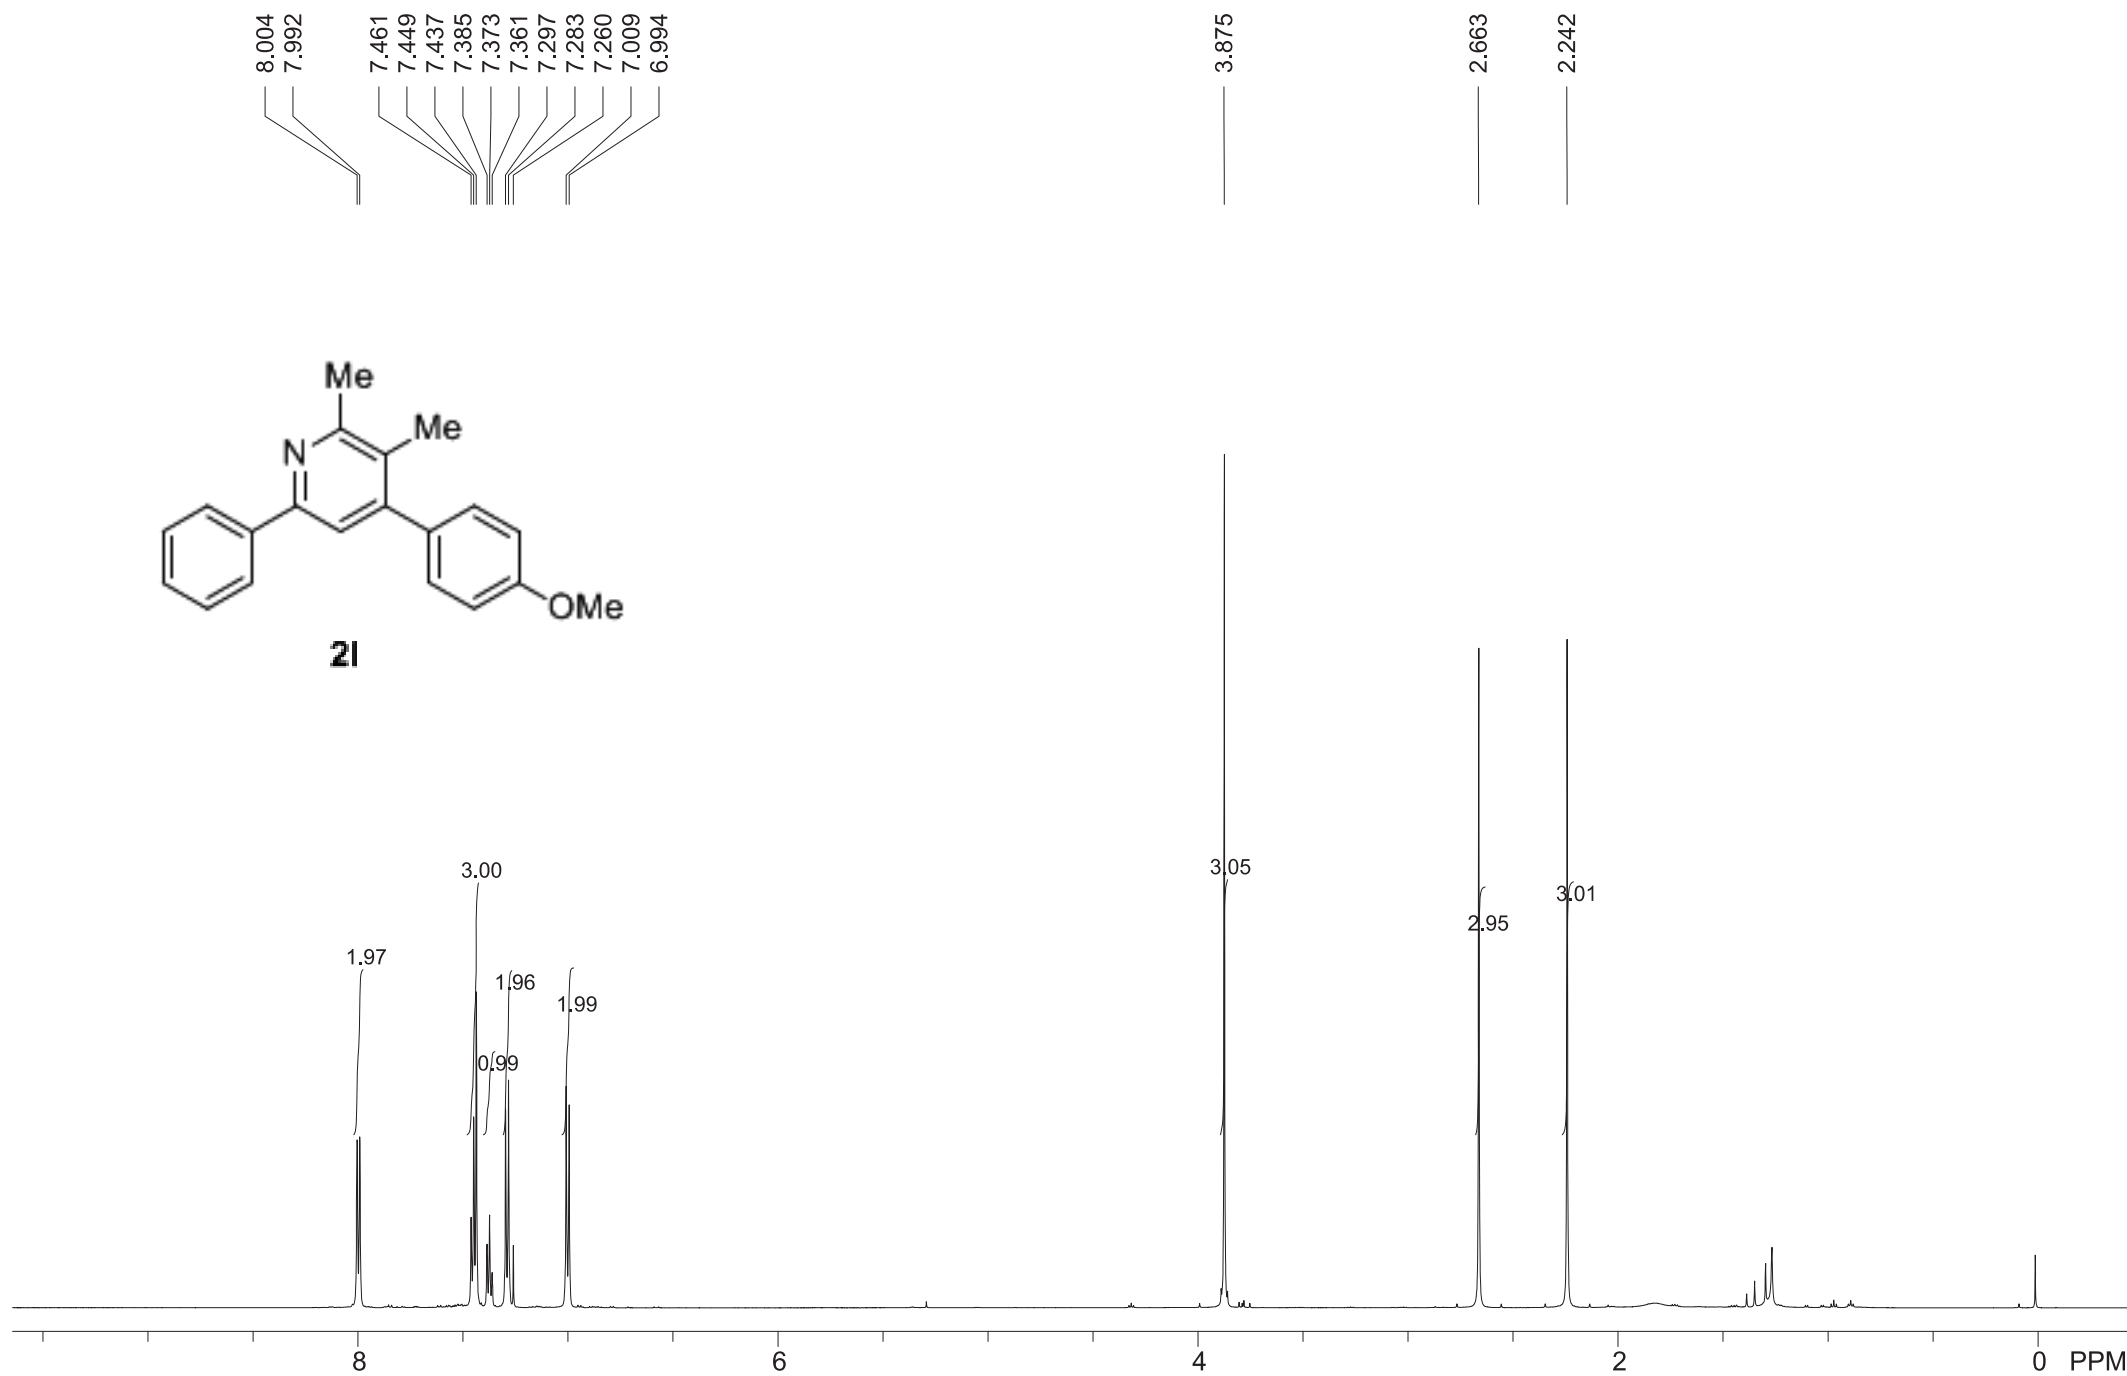

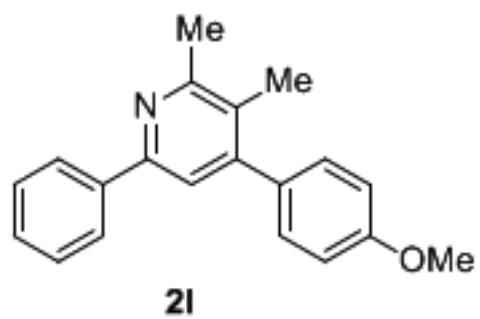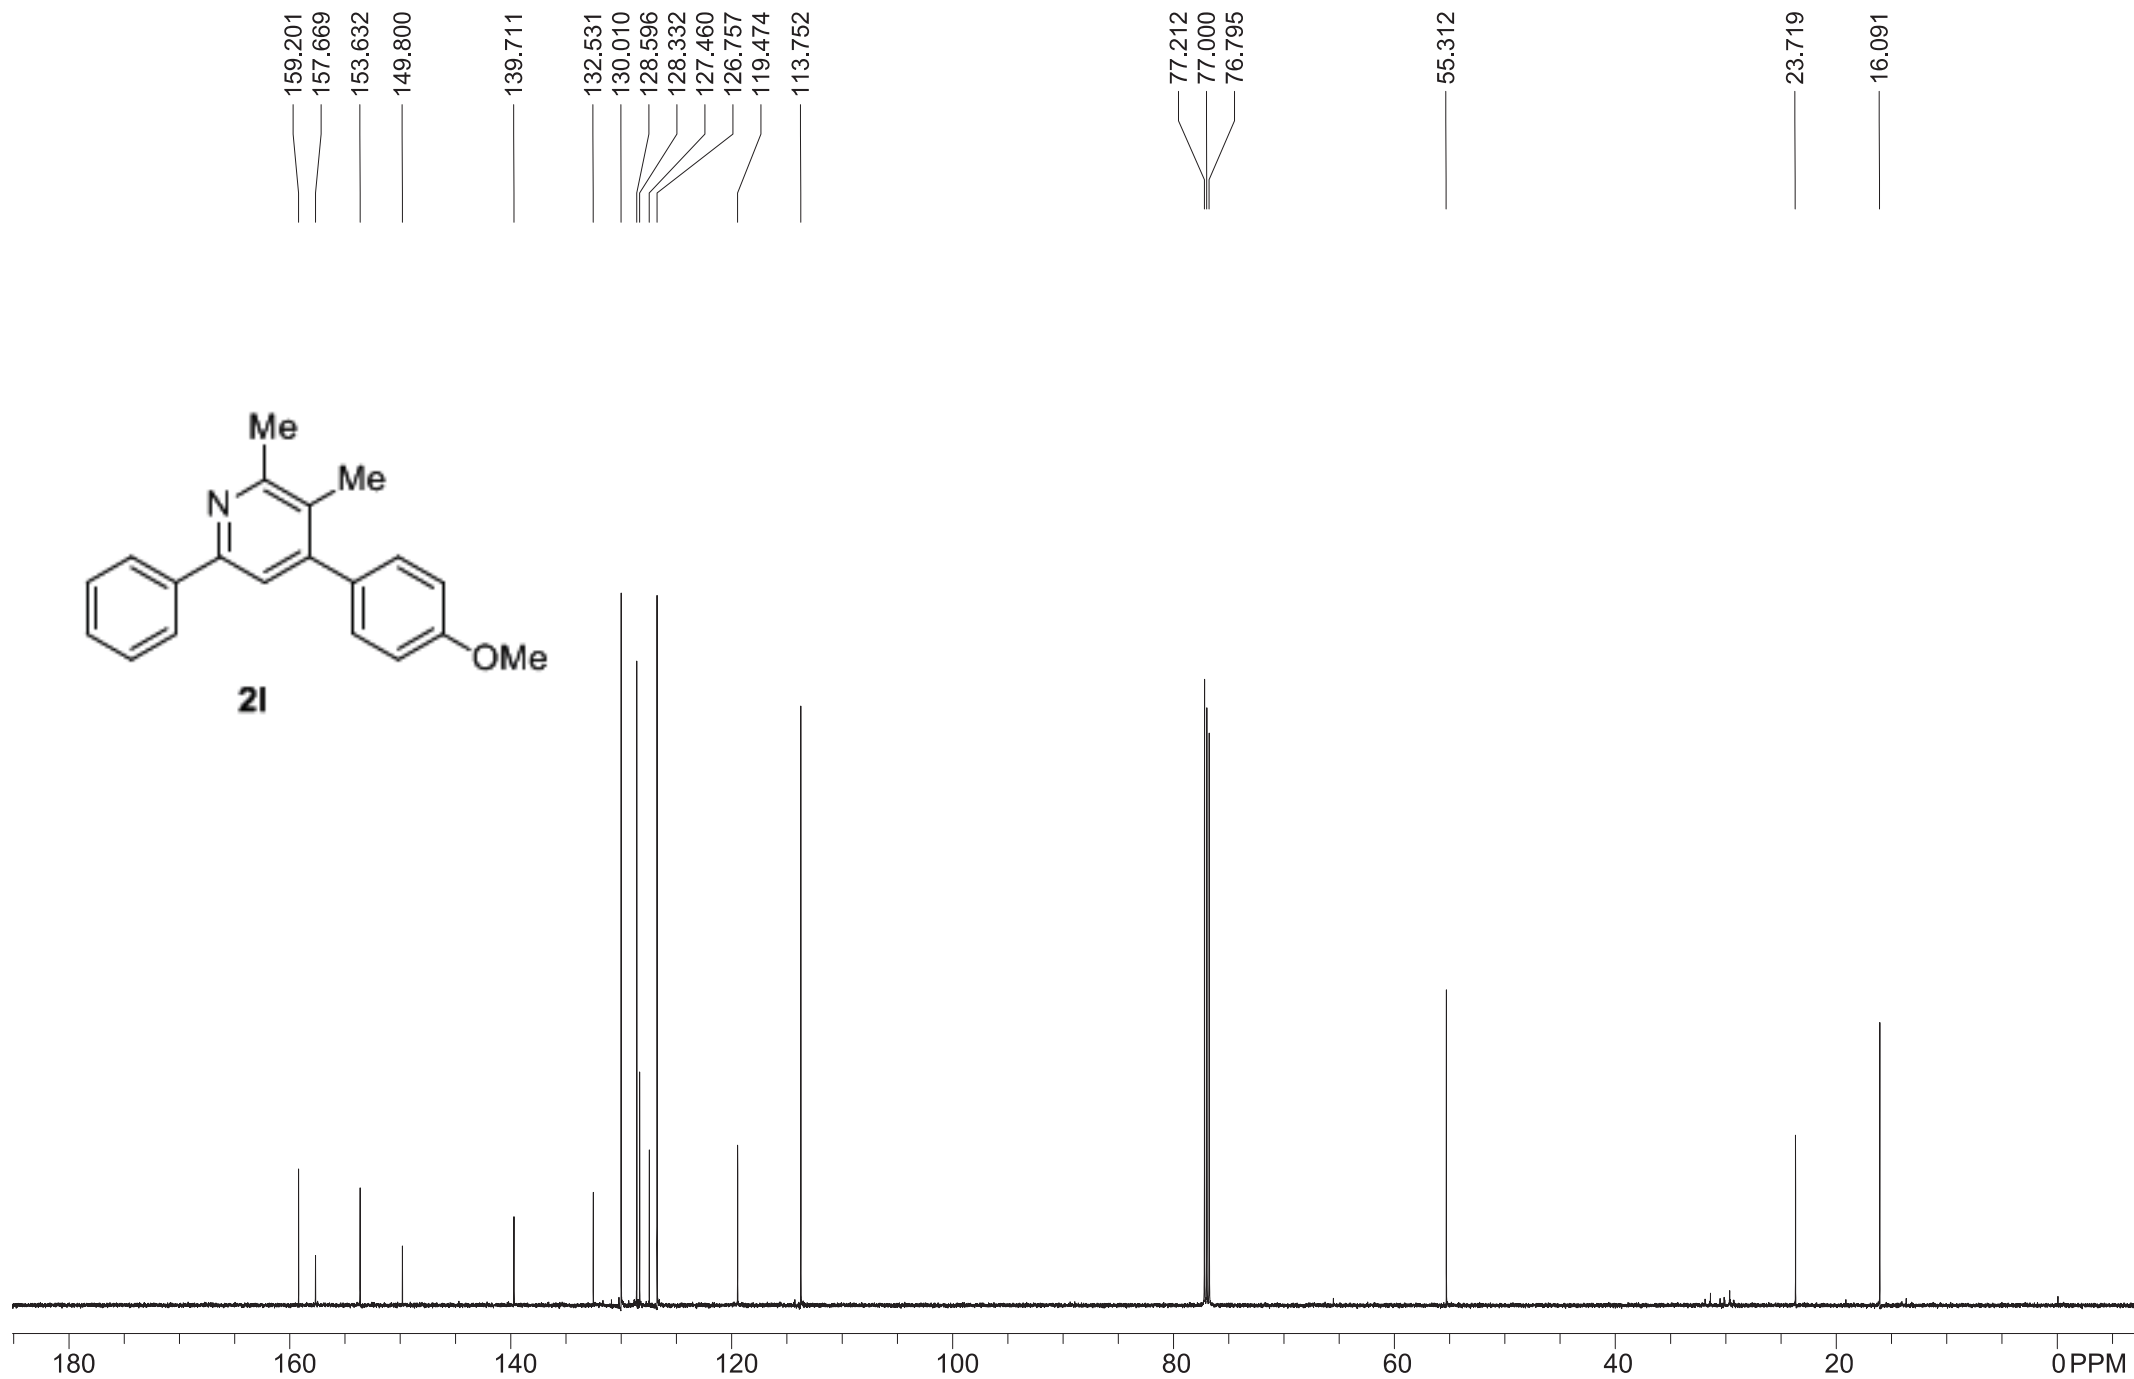

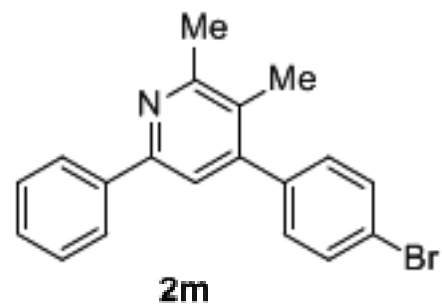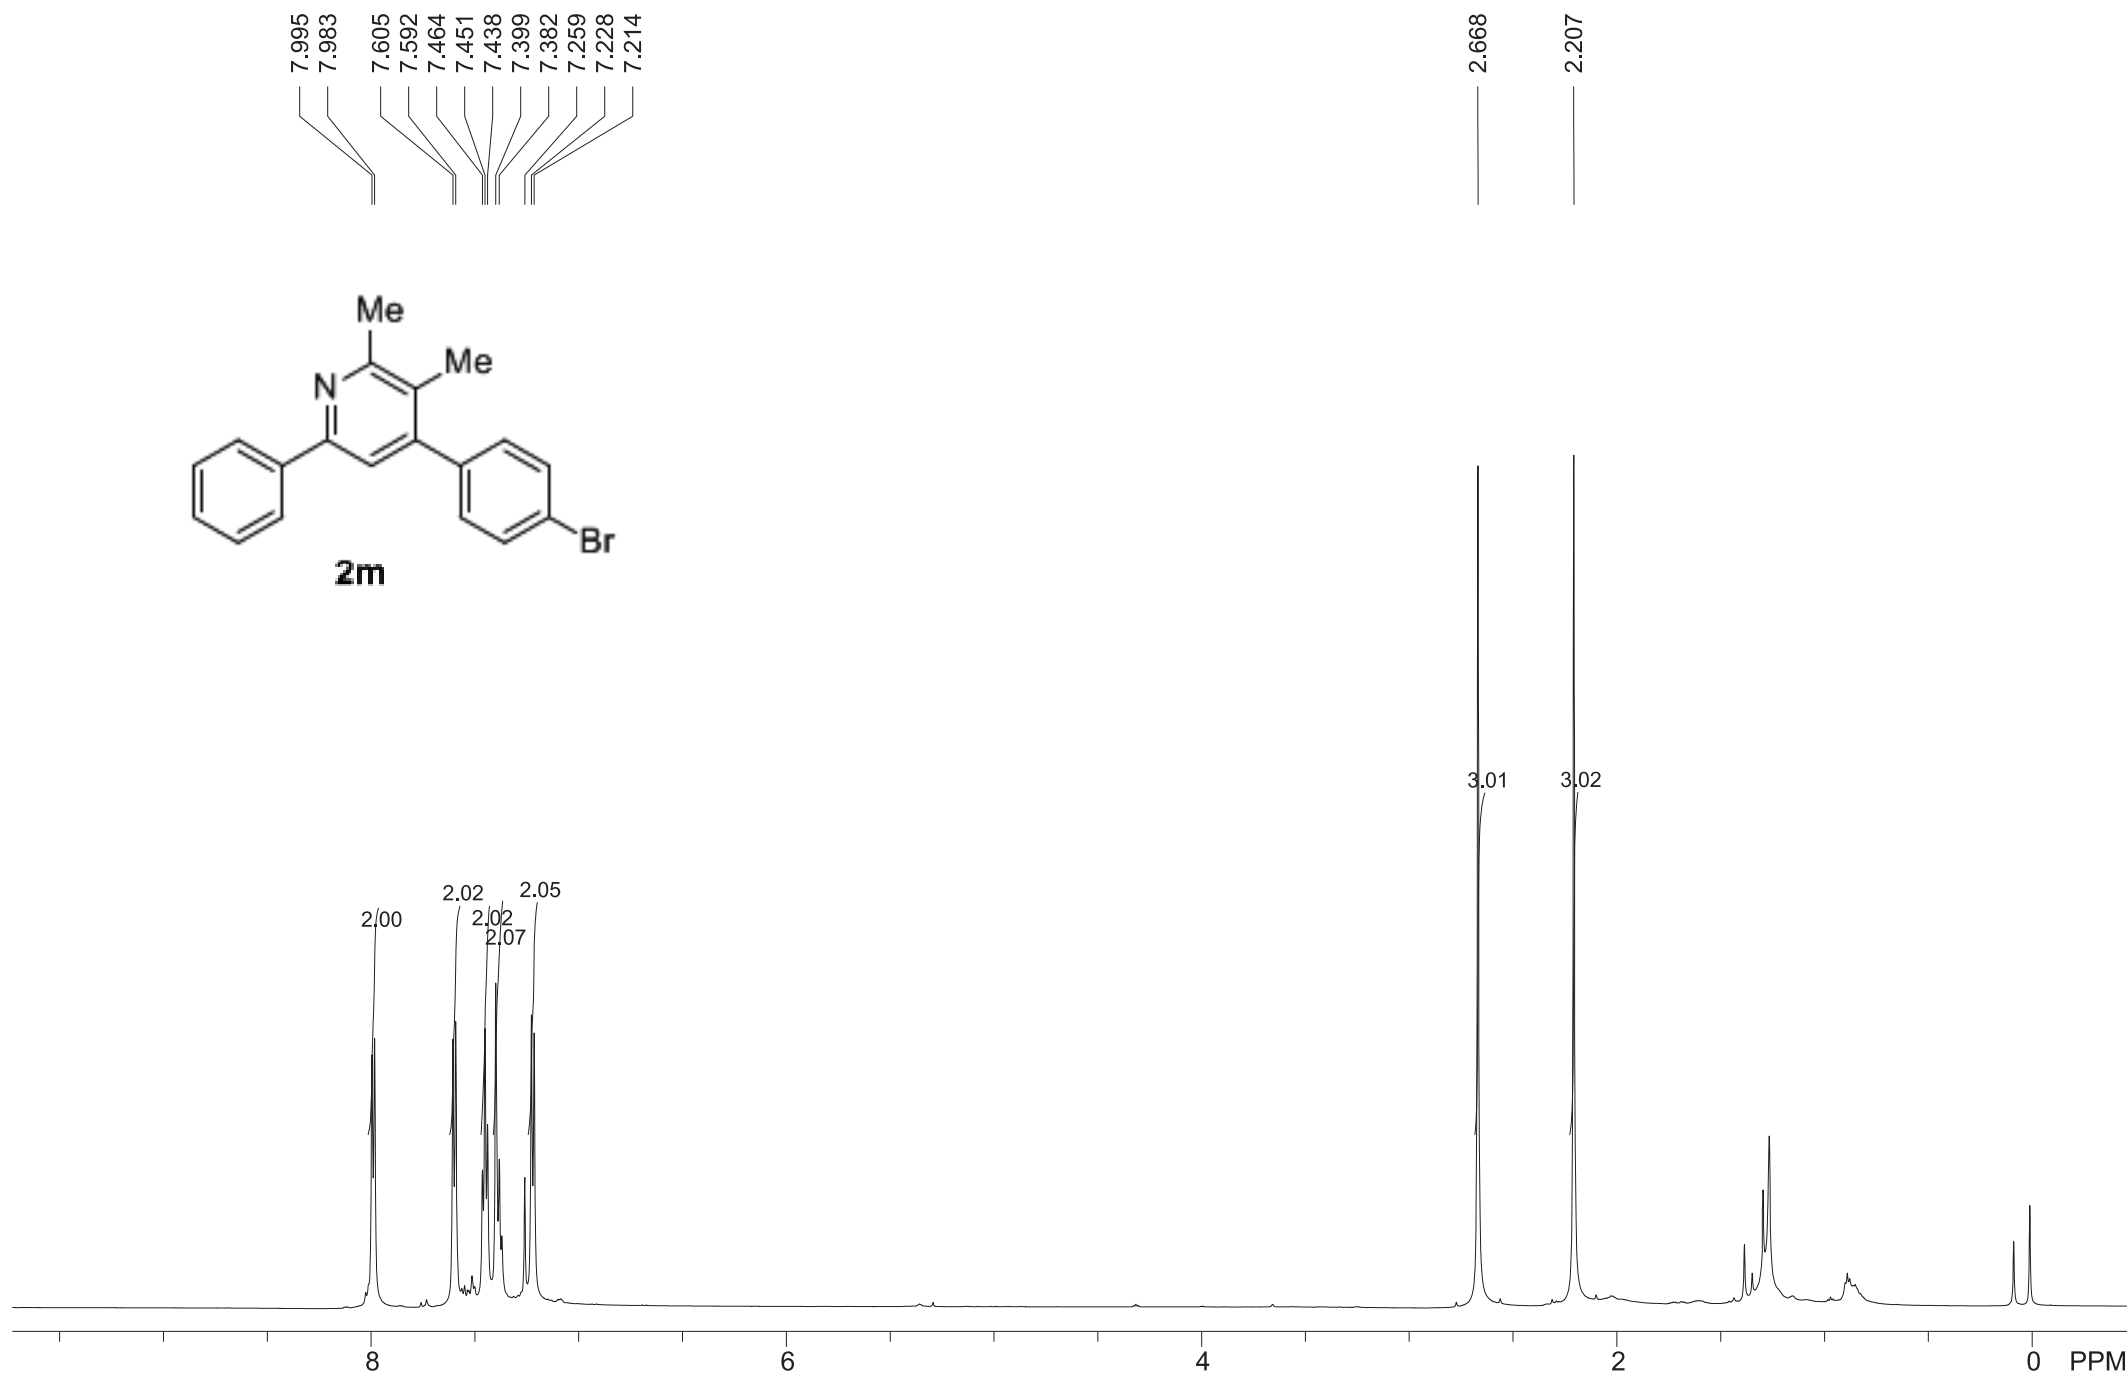

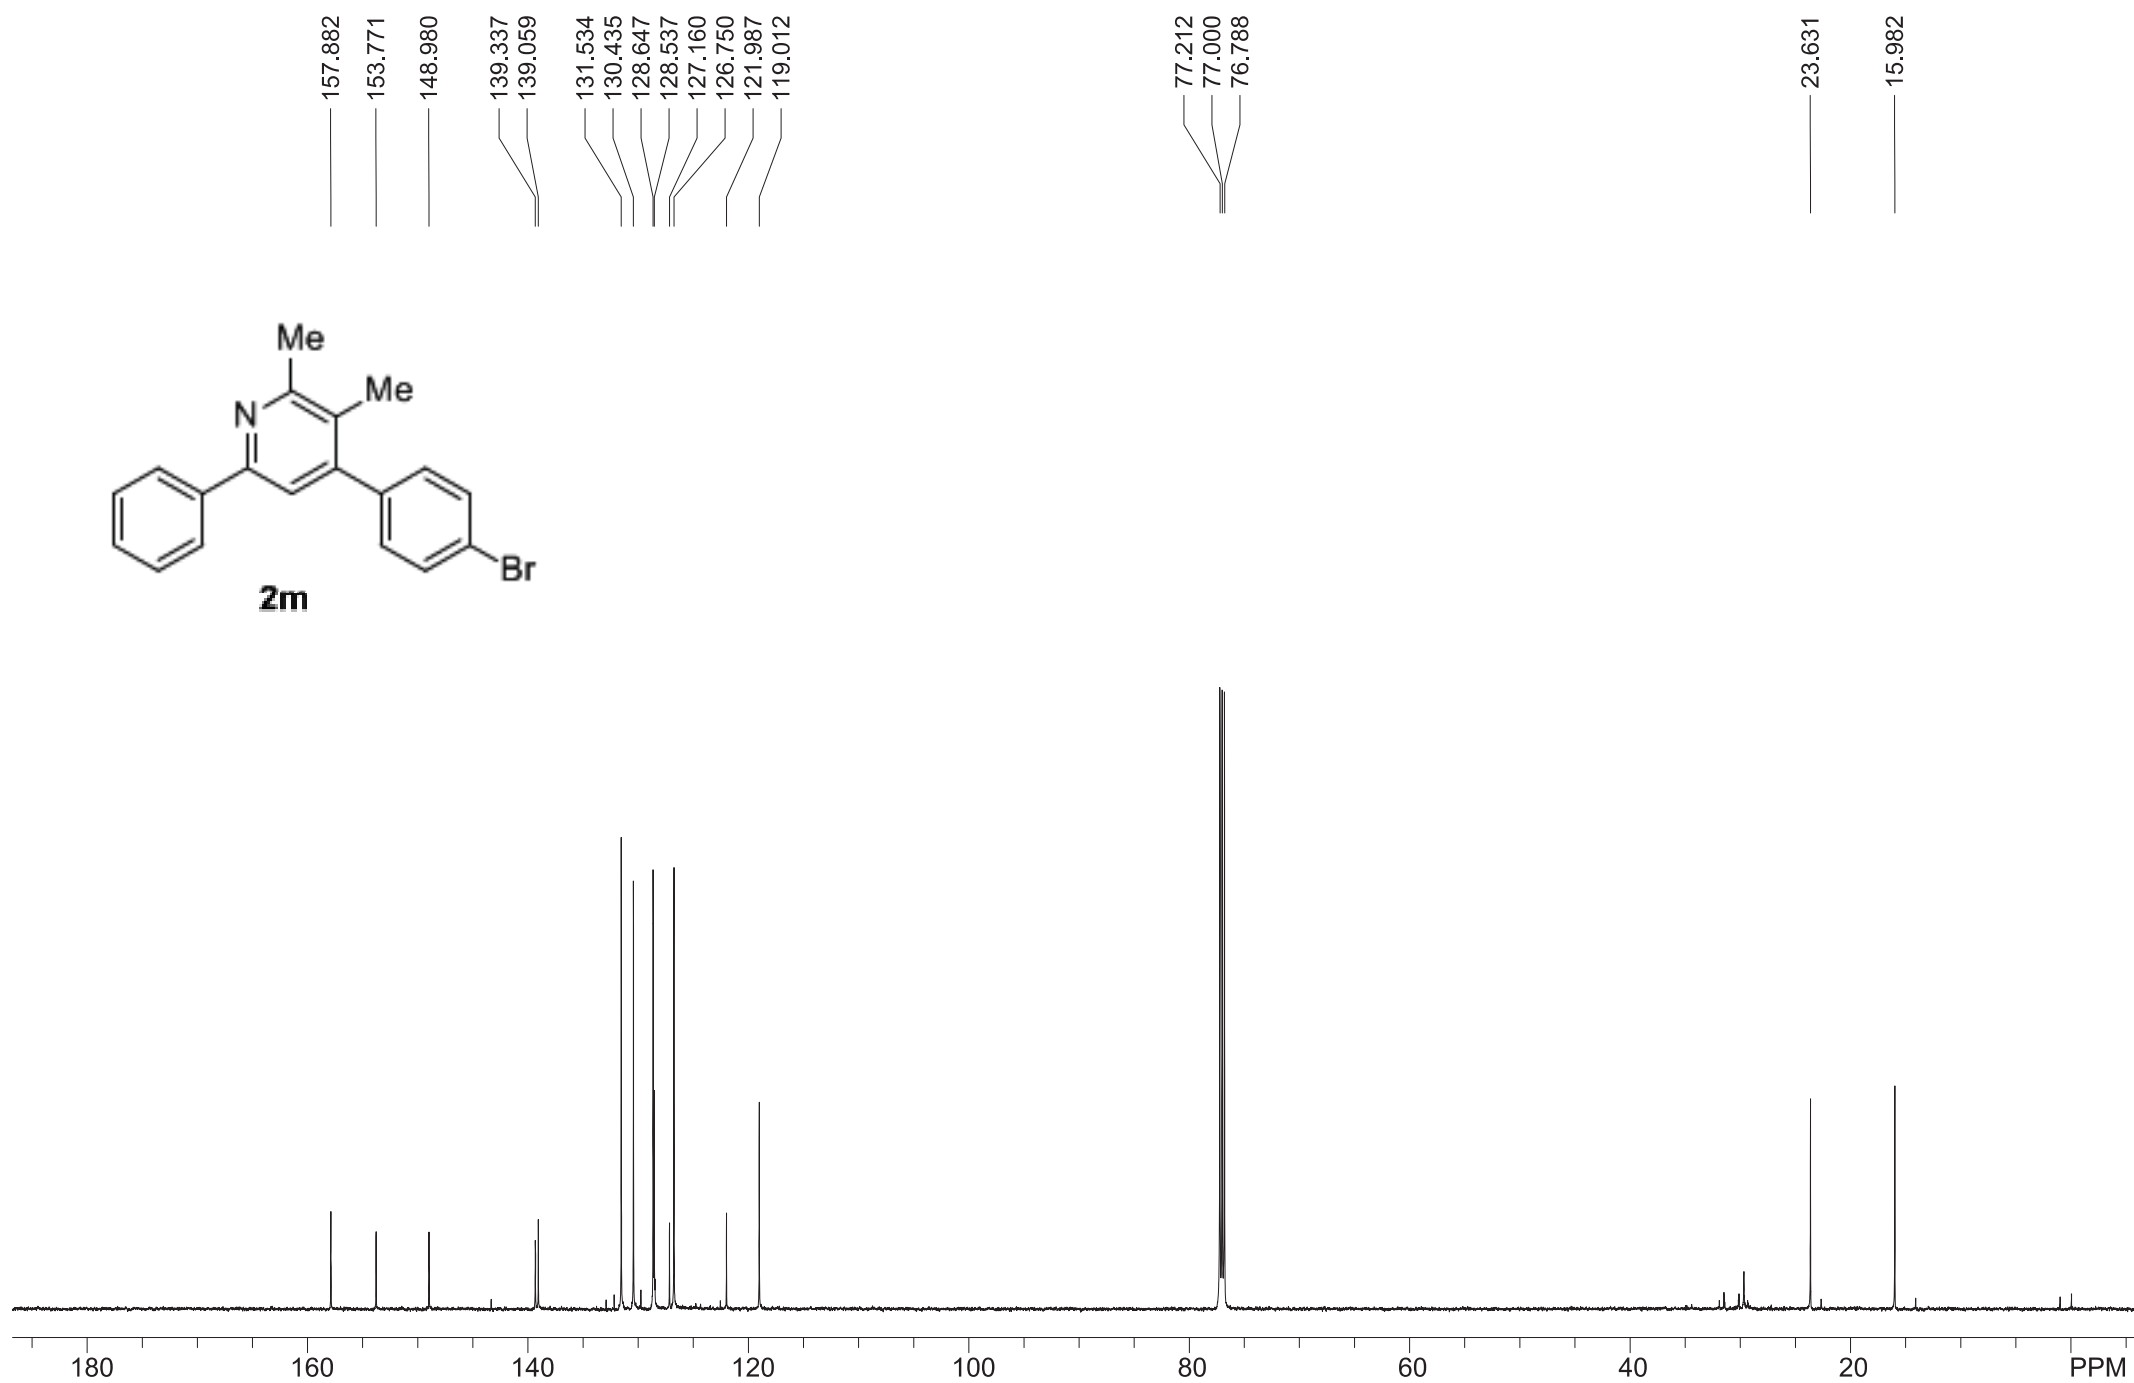

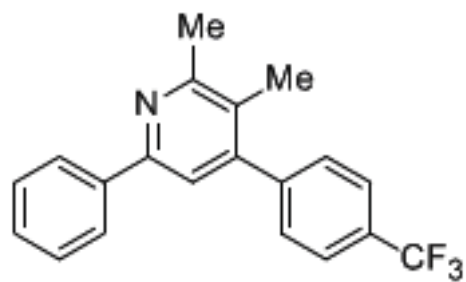

**2n**

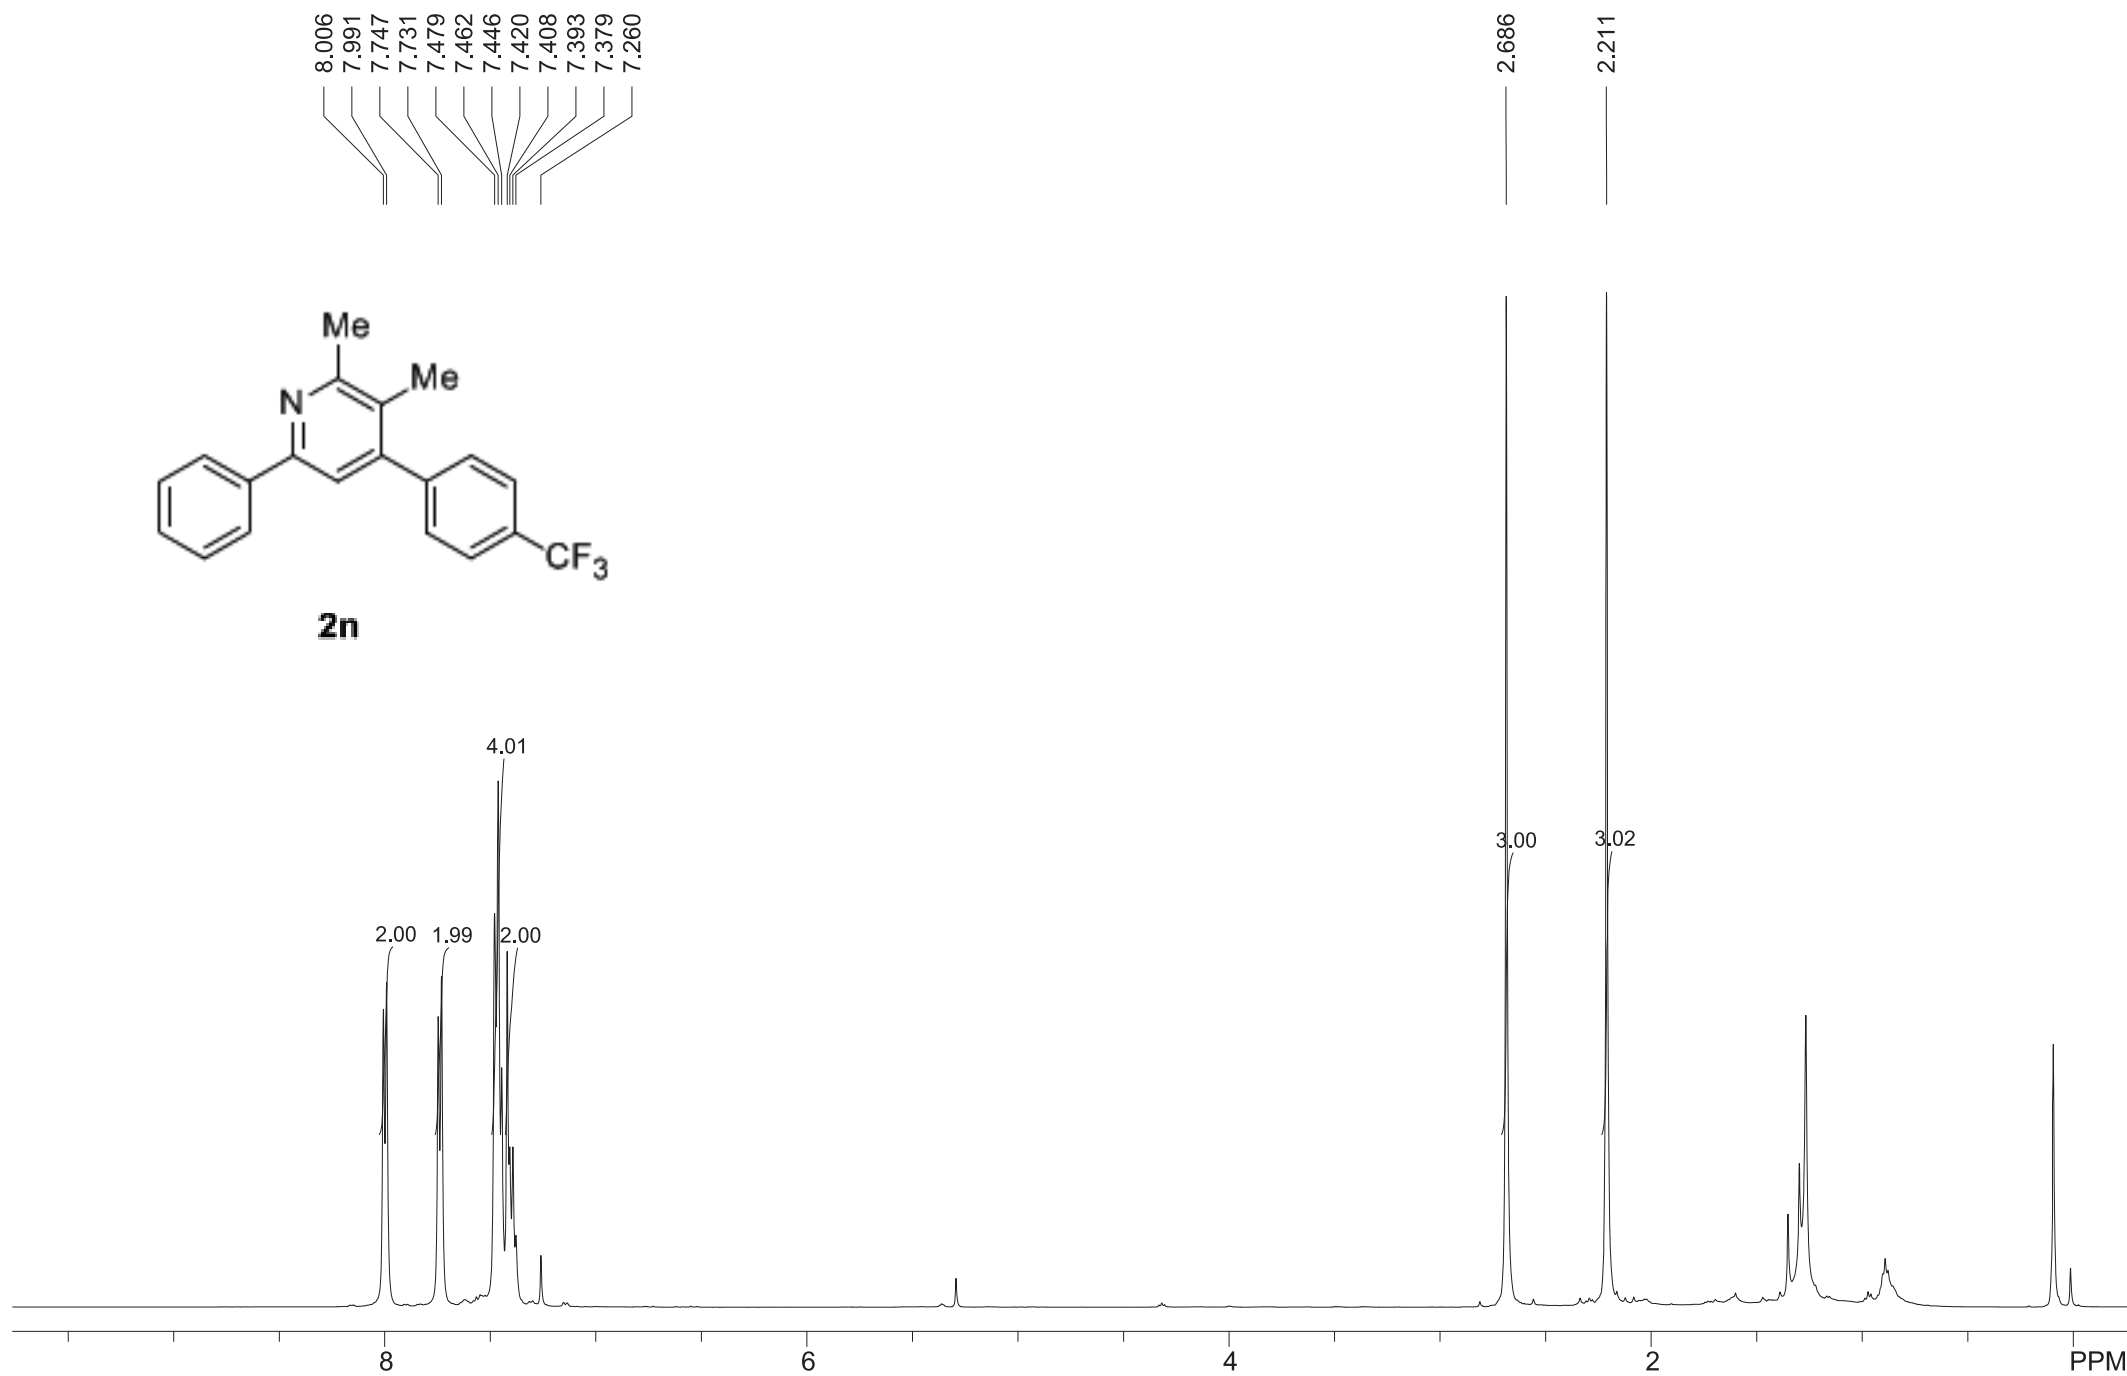

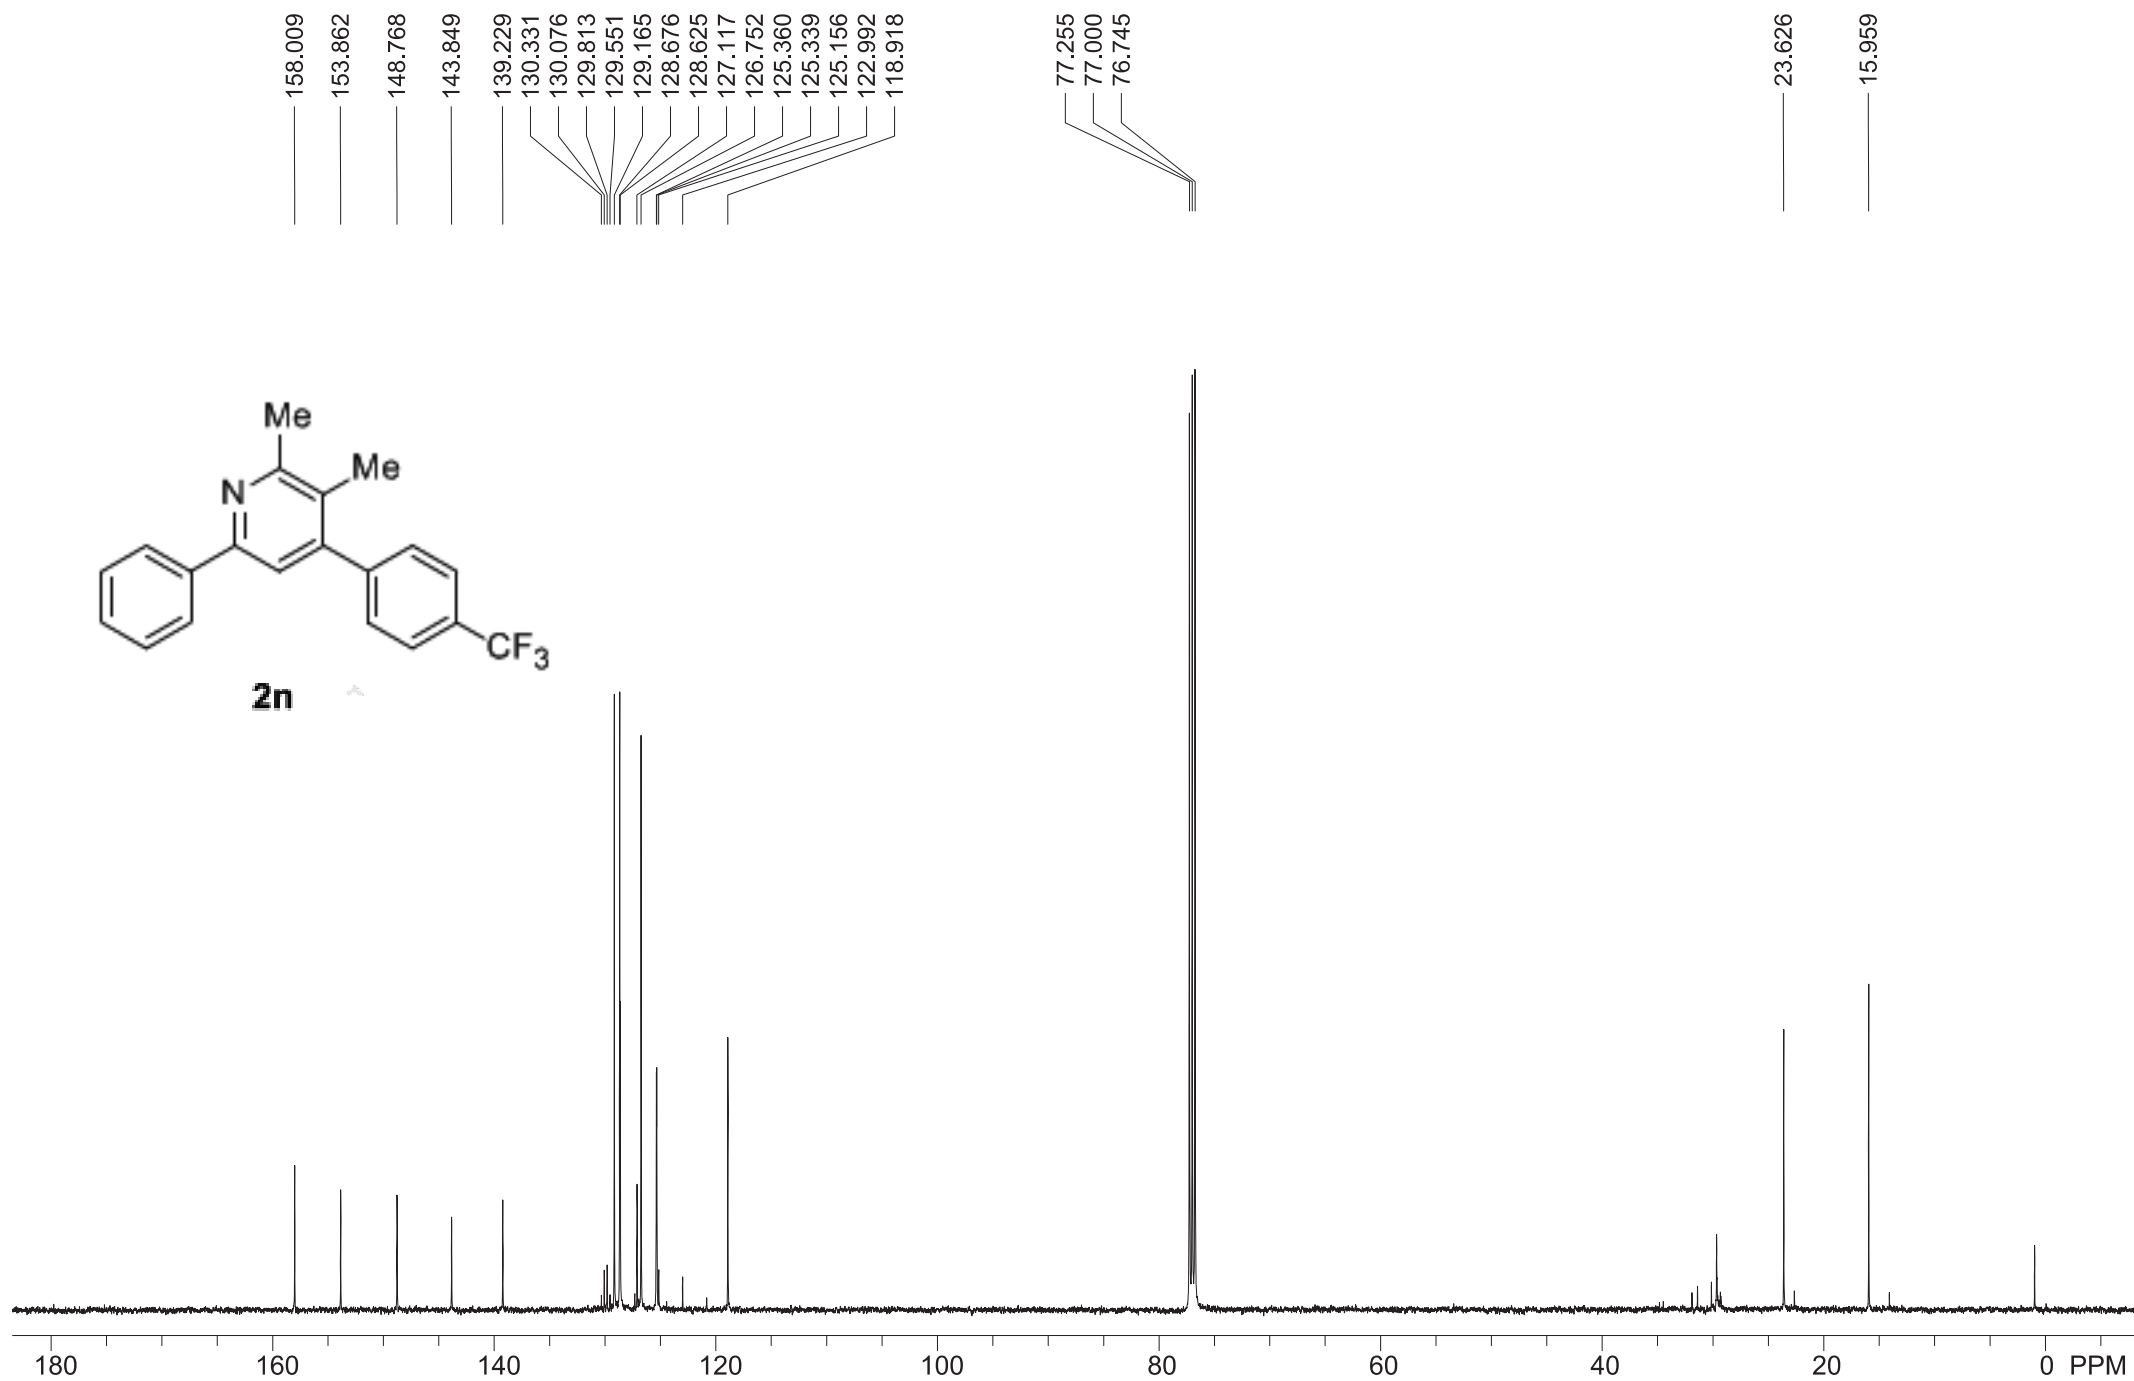

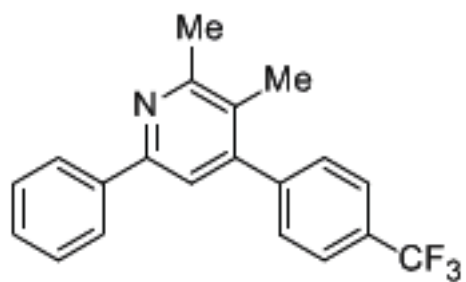

**2n**

62.515

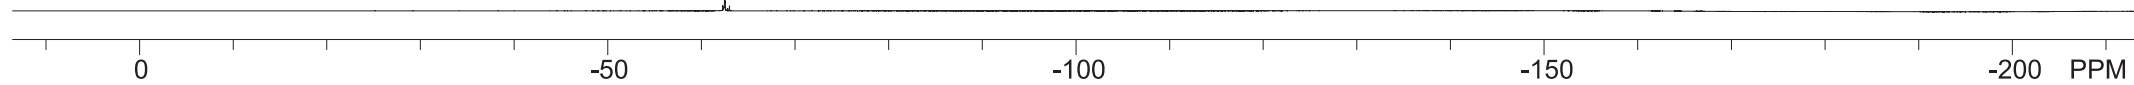

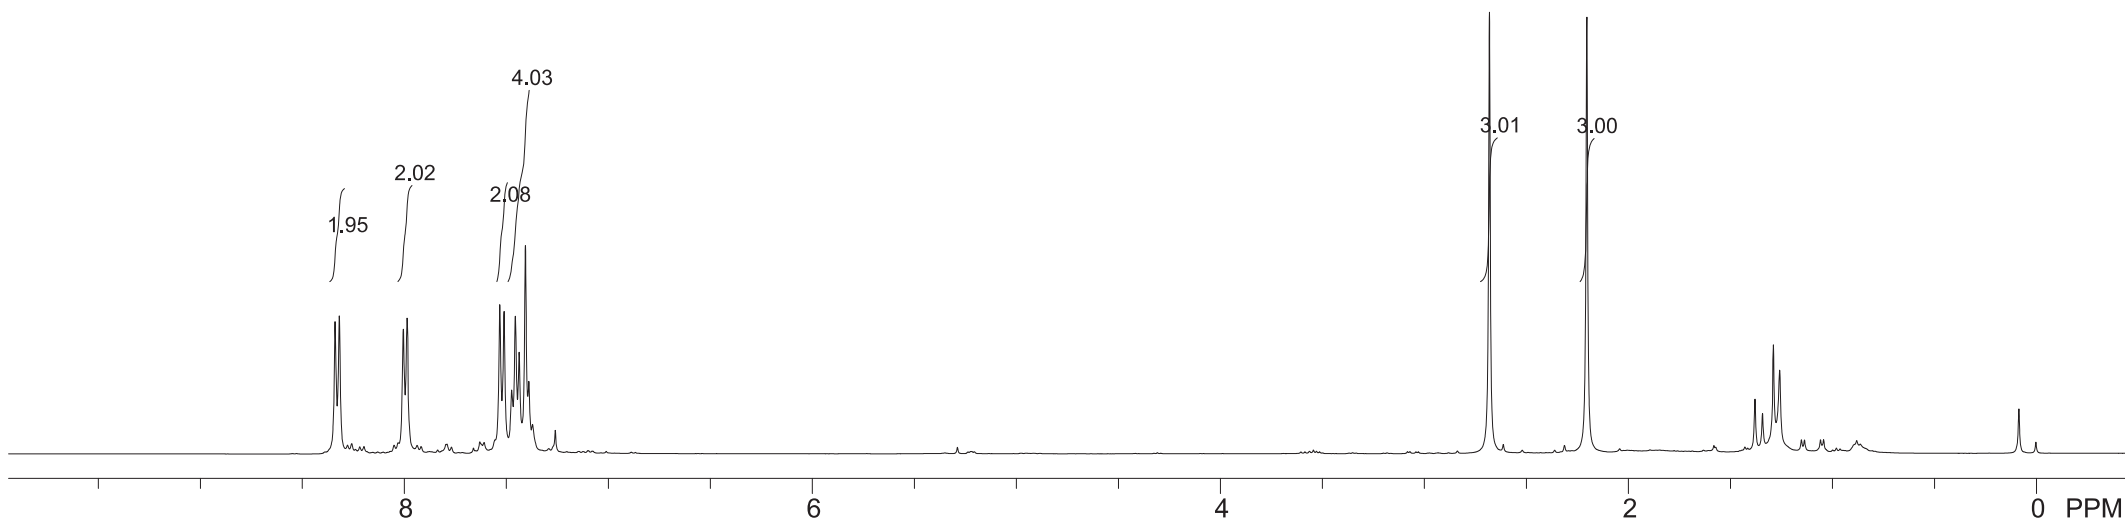



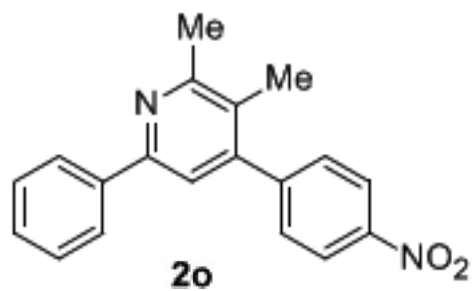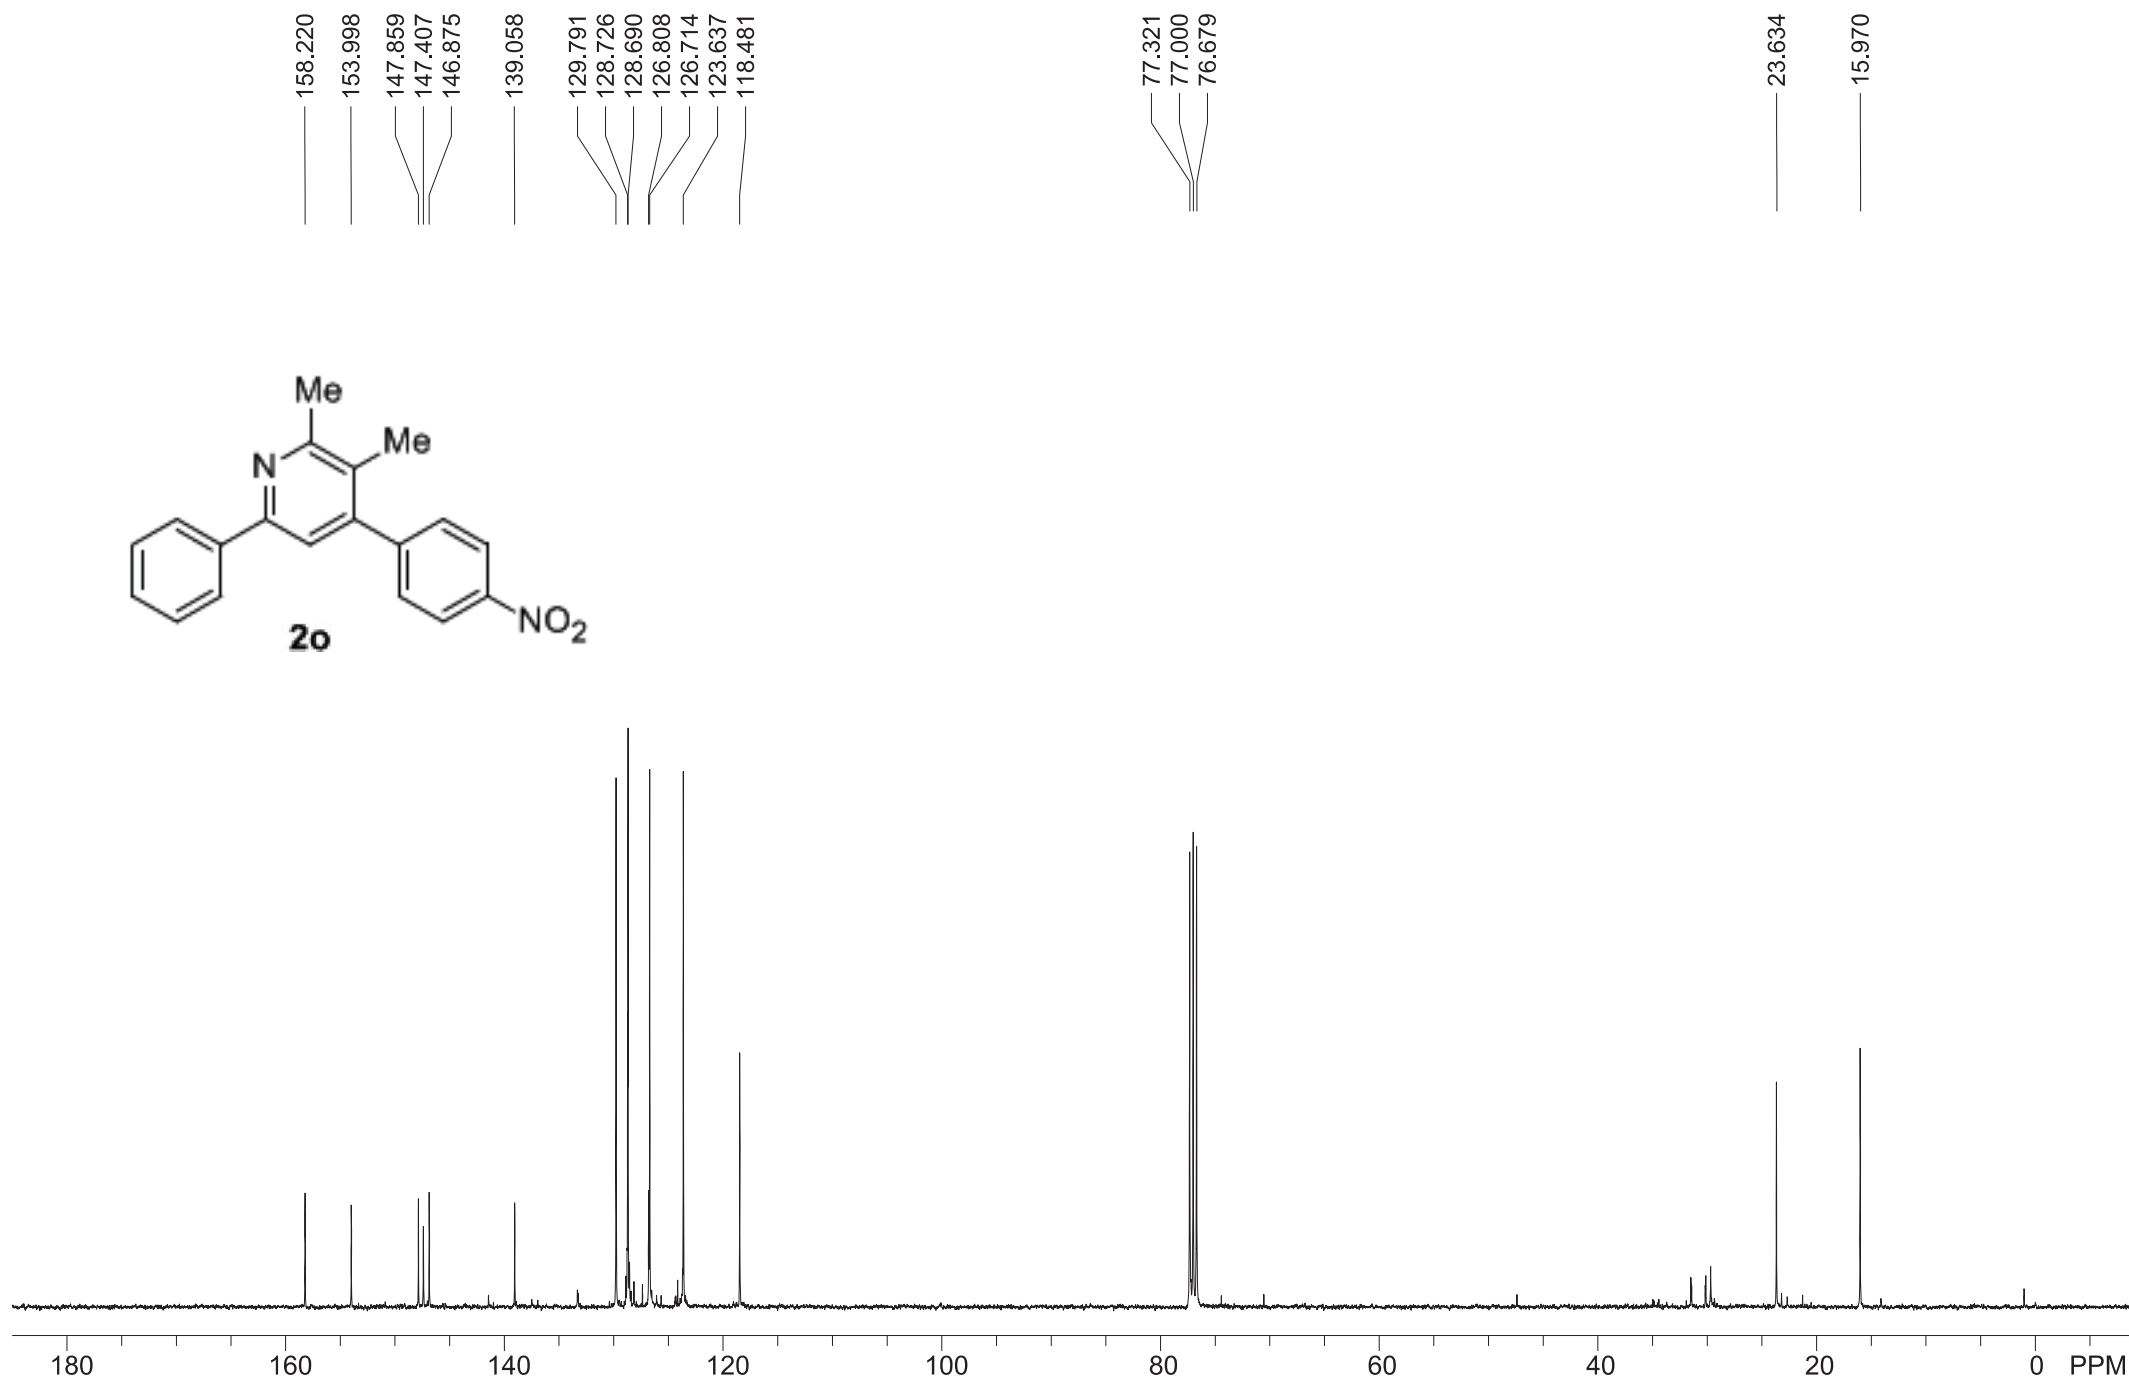

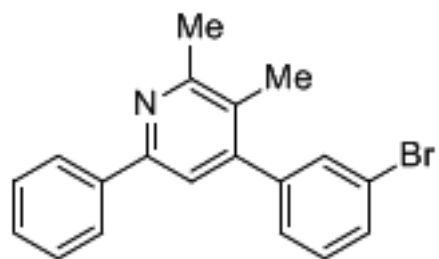

**2p**

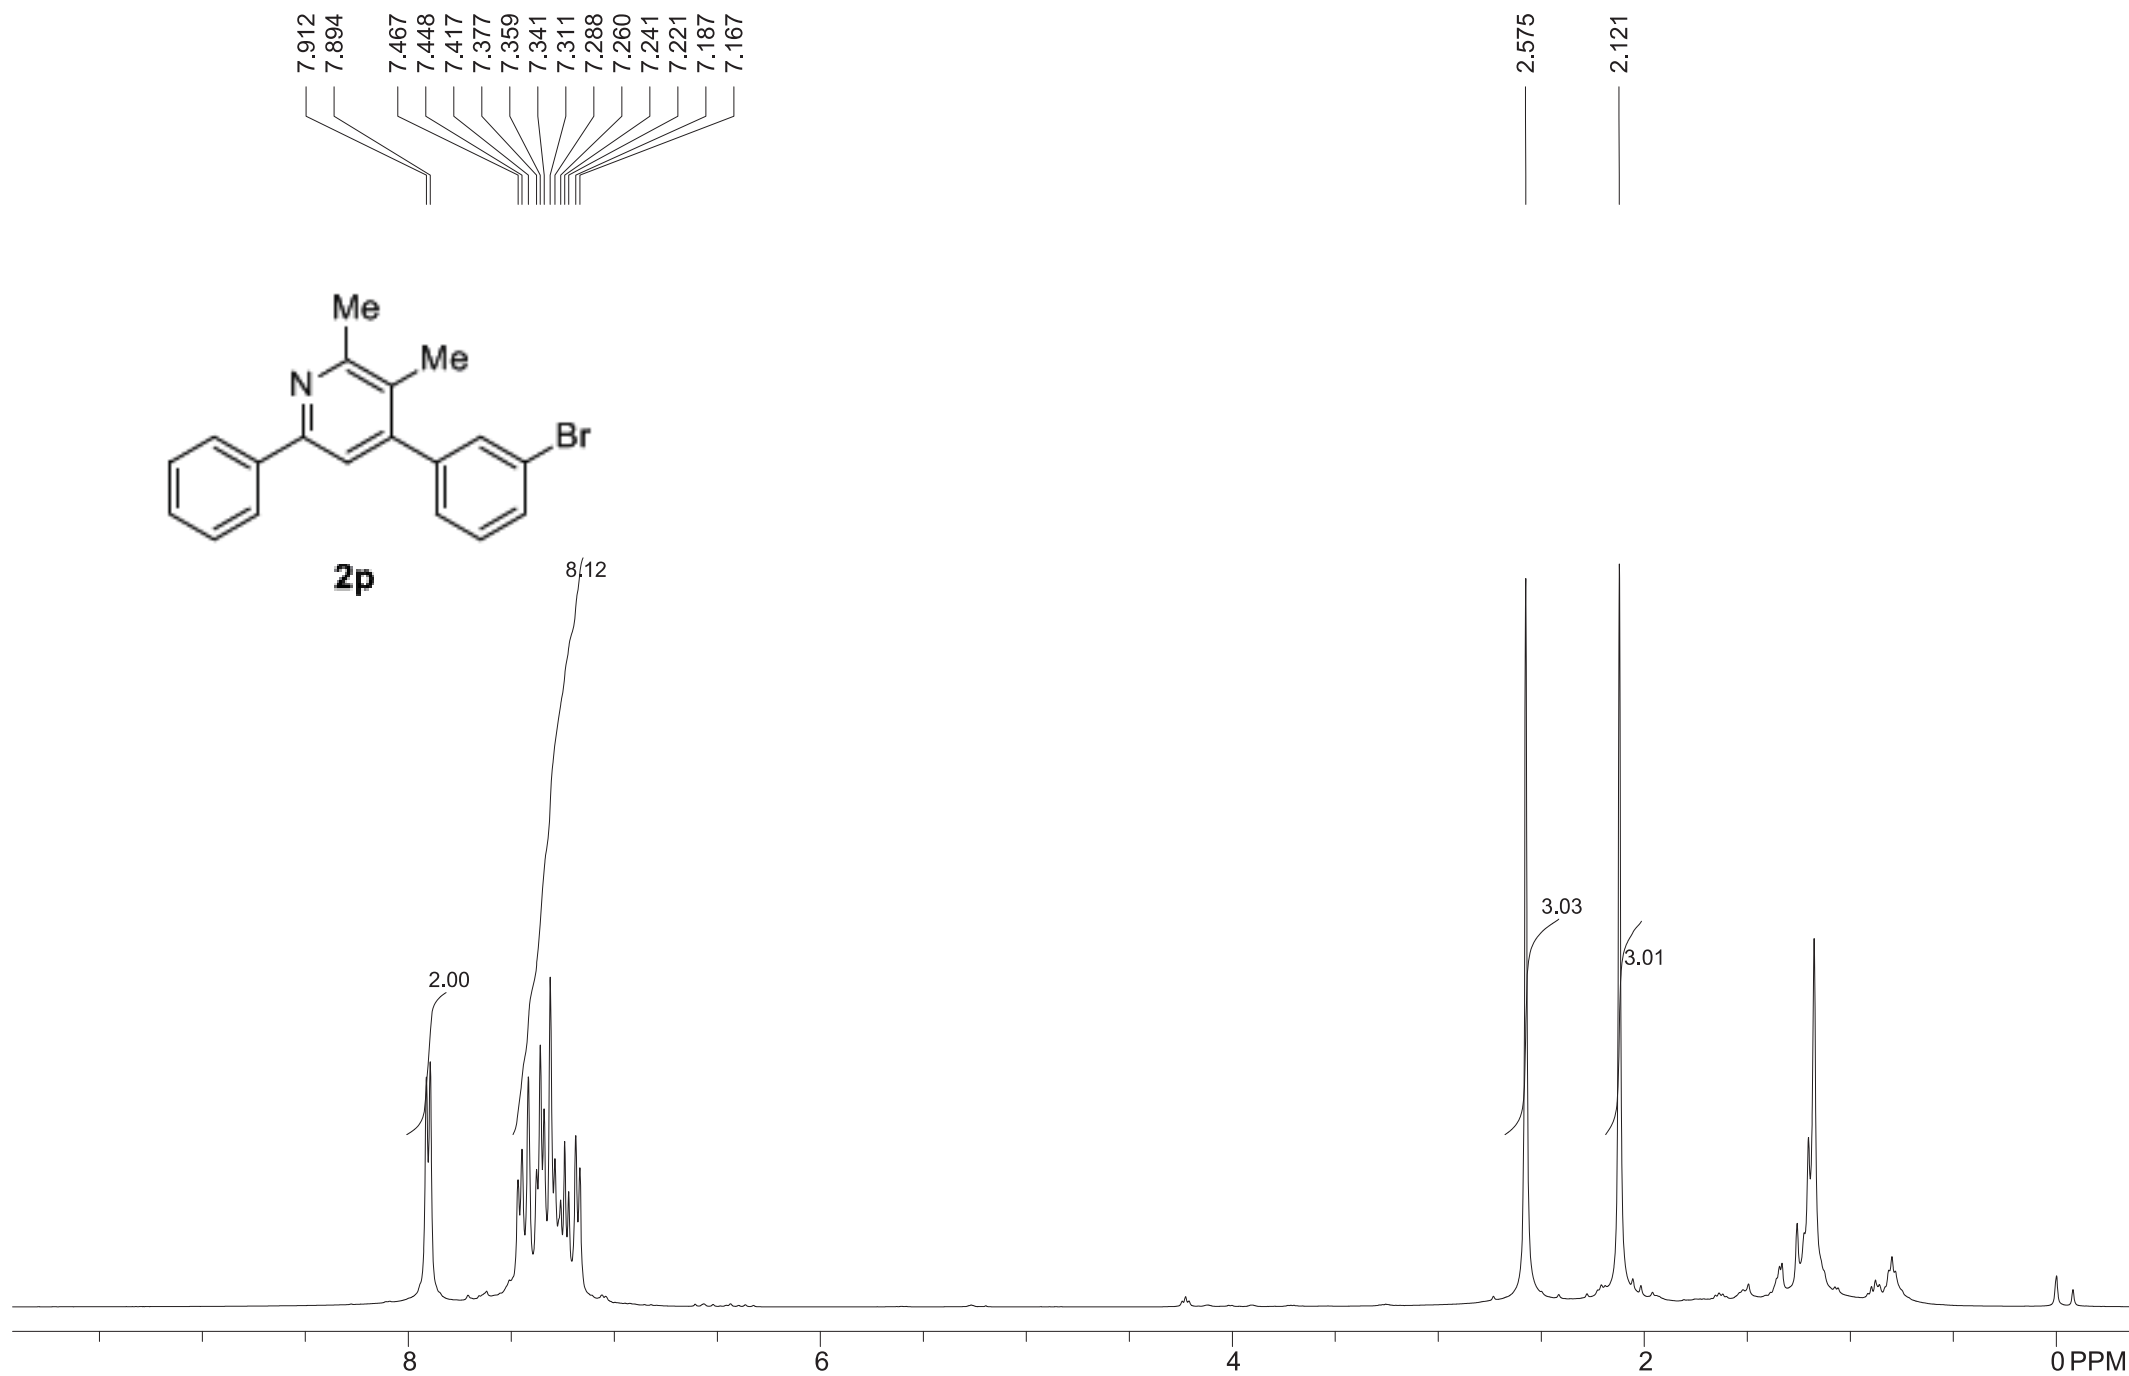

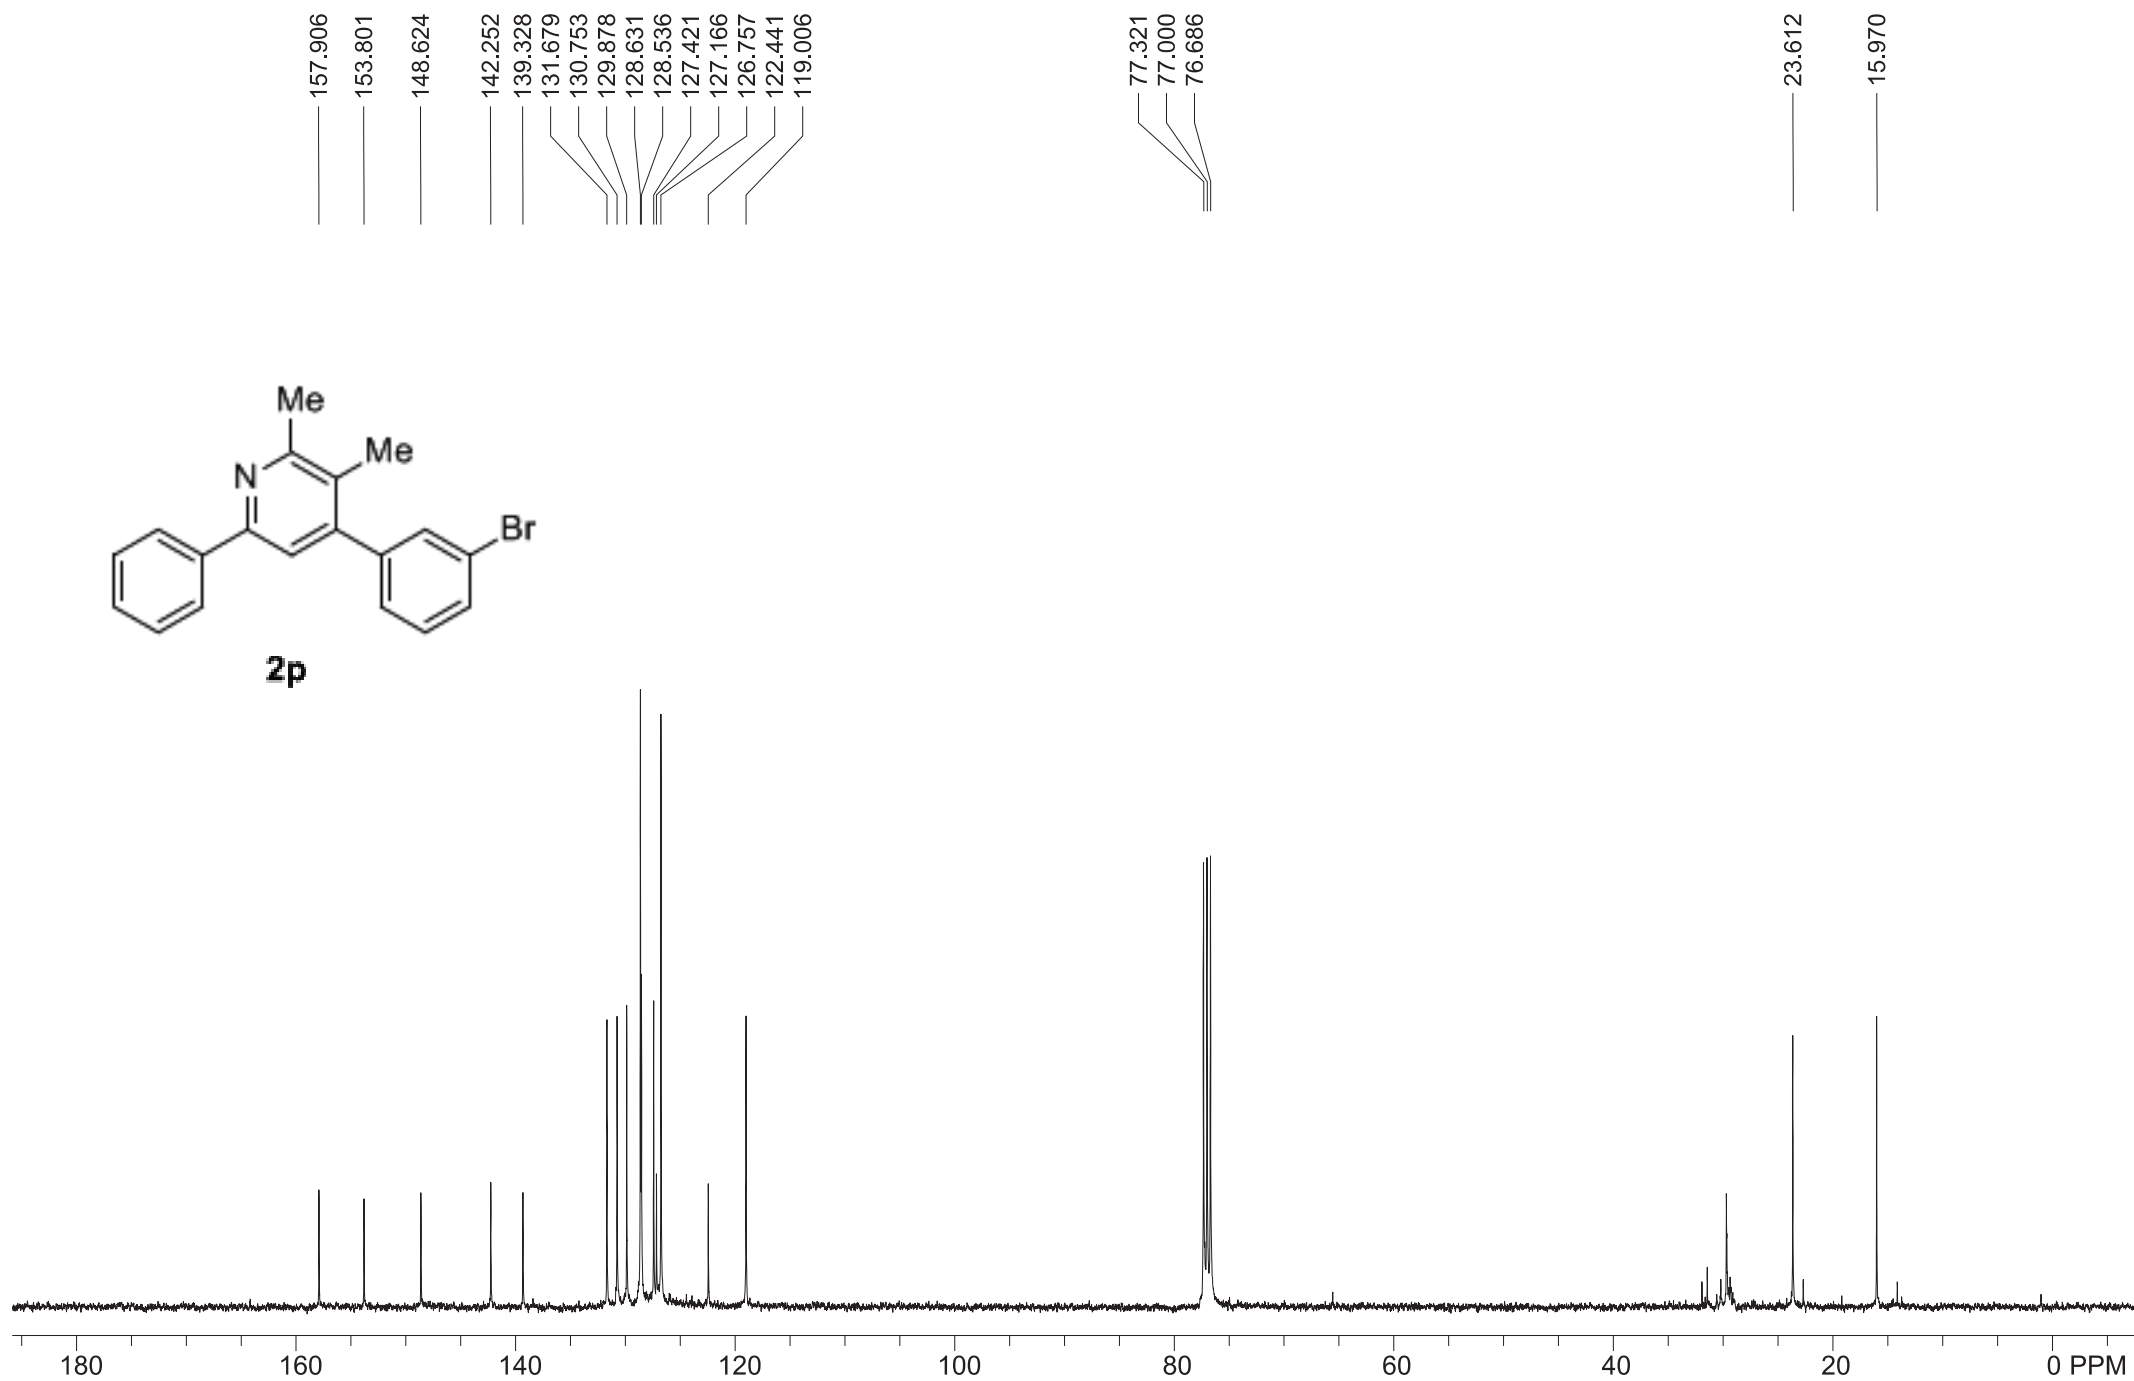

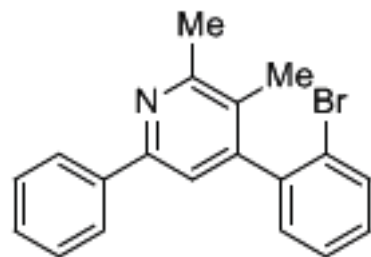

**2q**

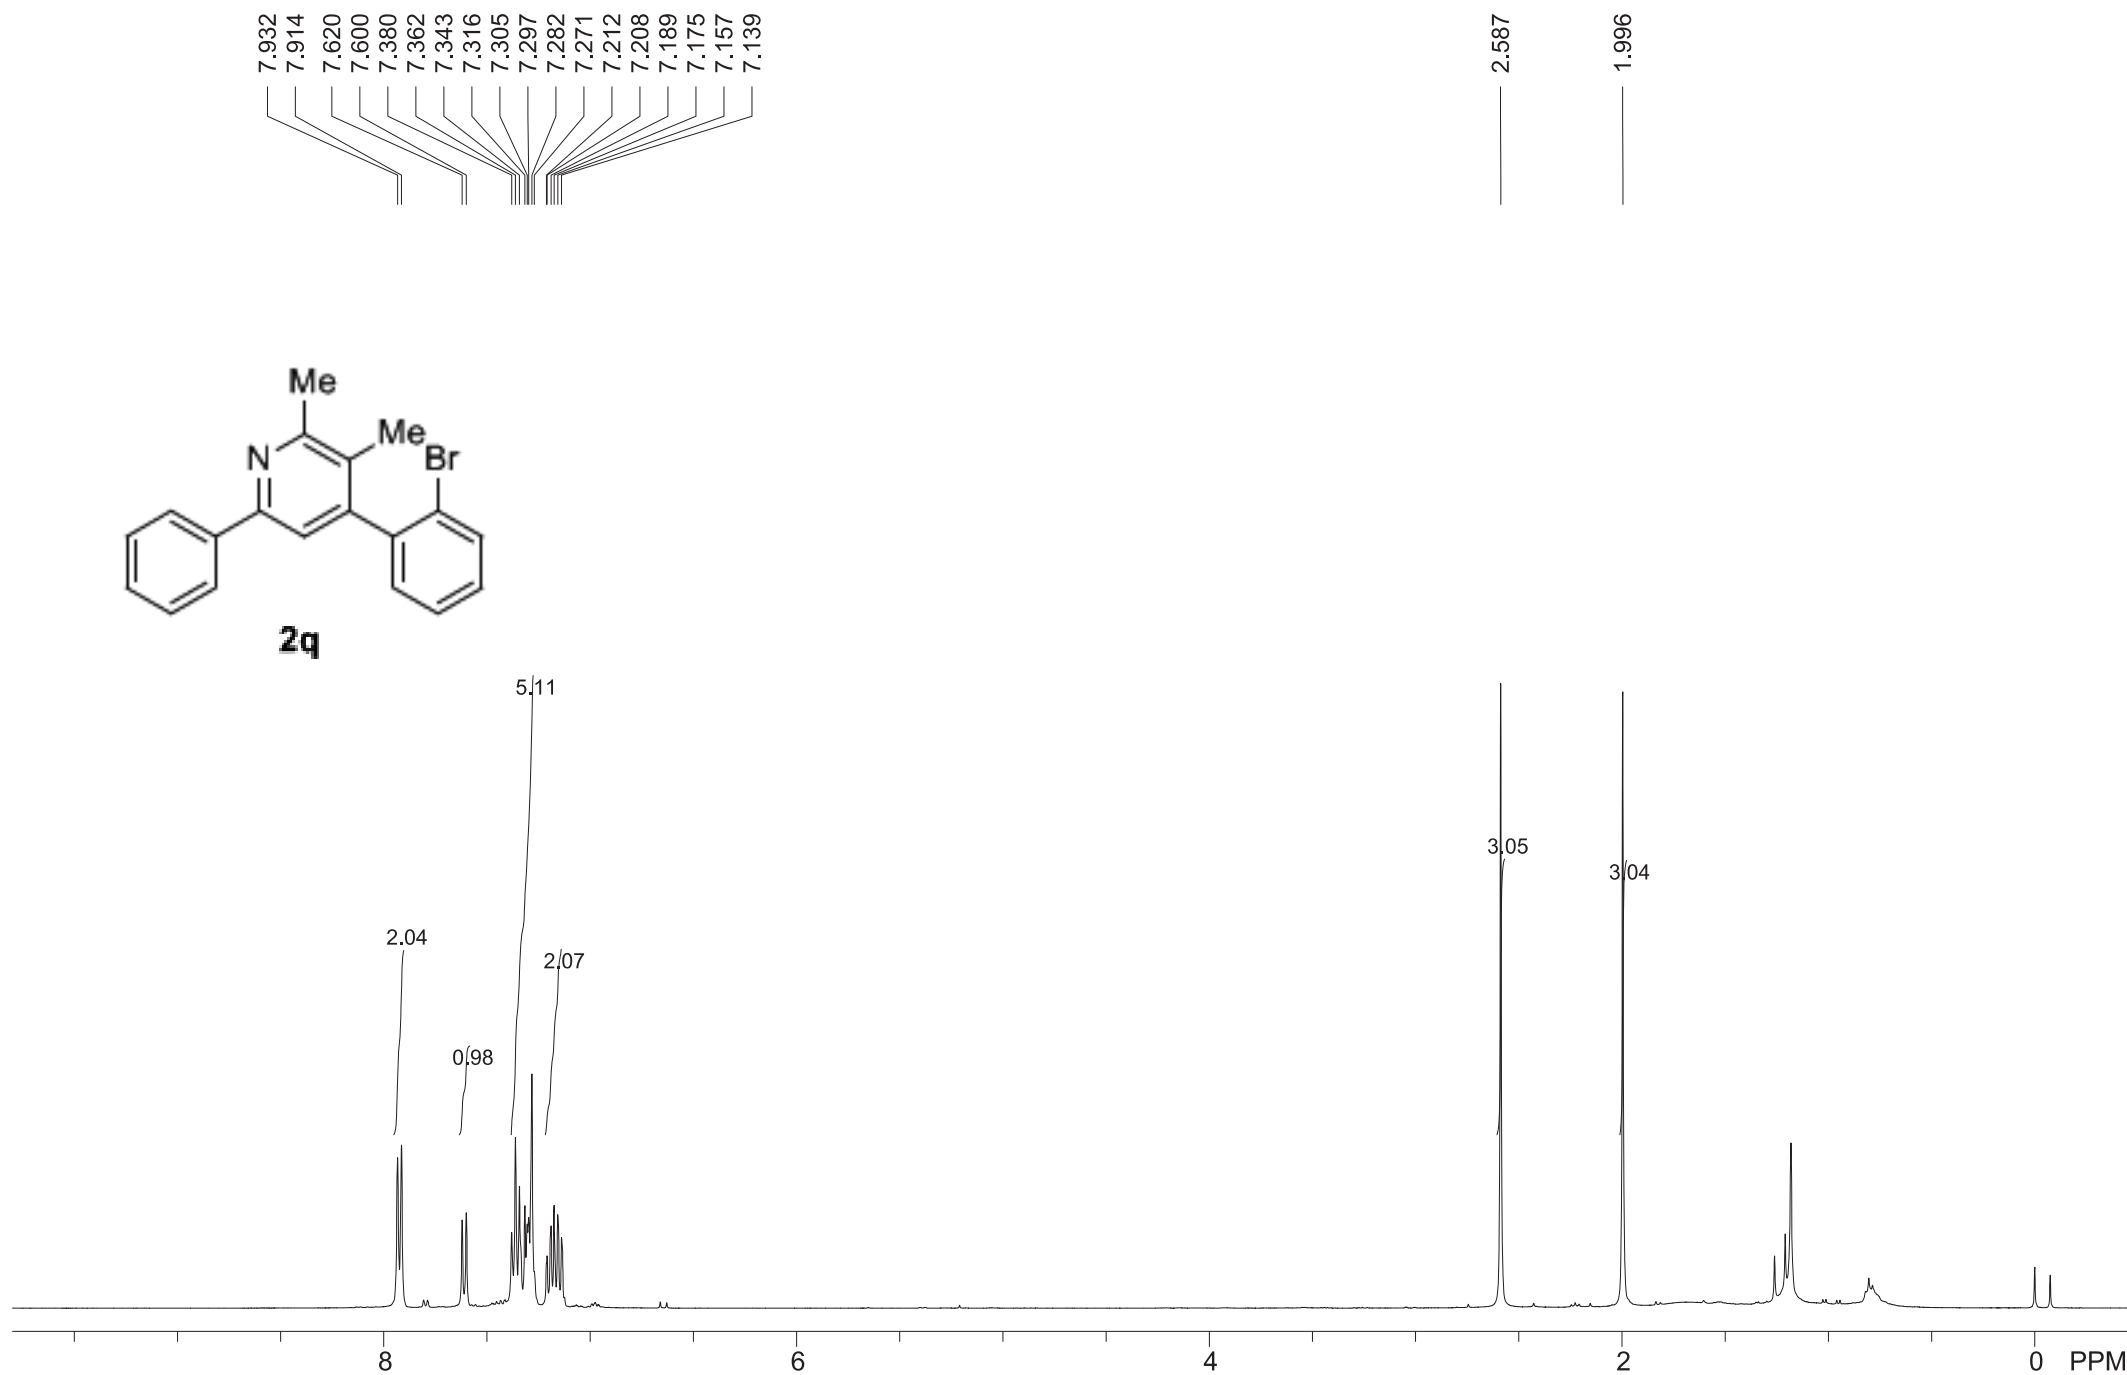

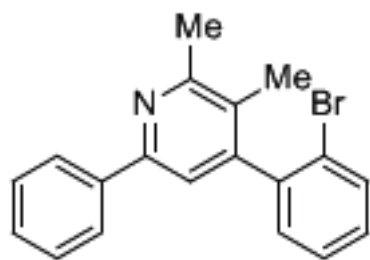

**2q**

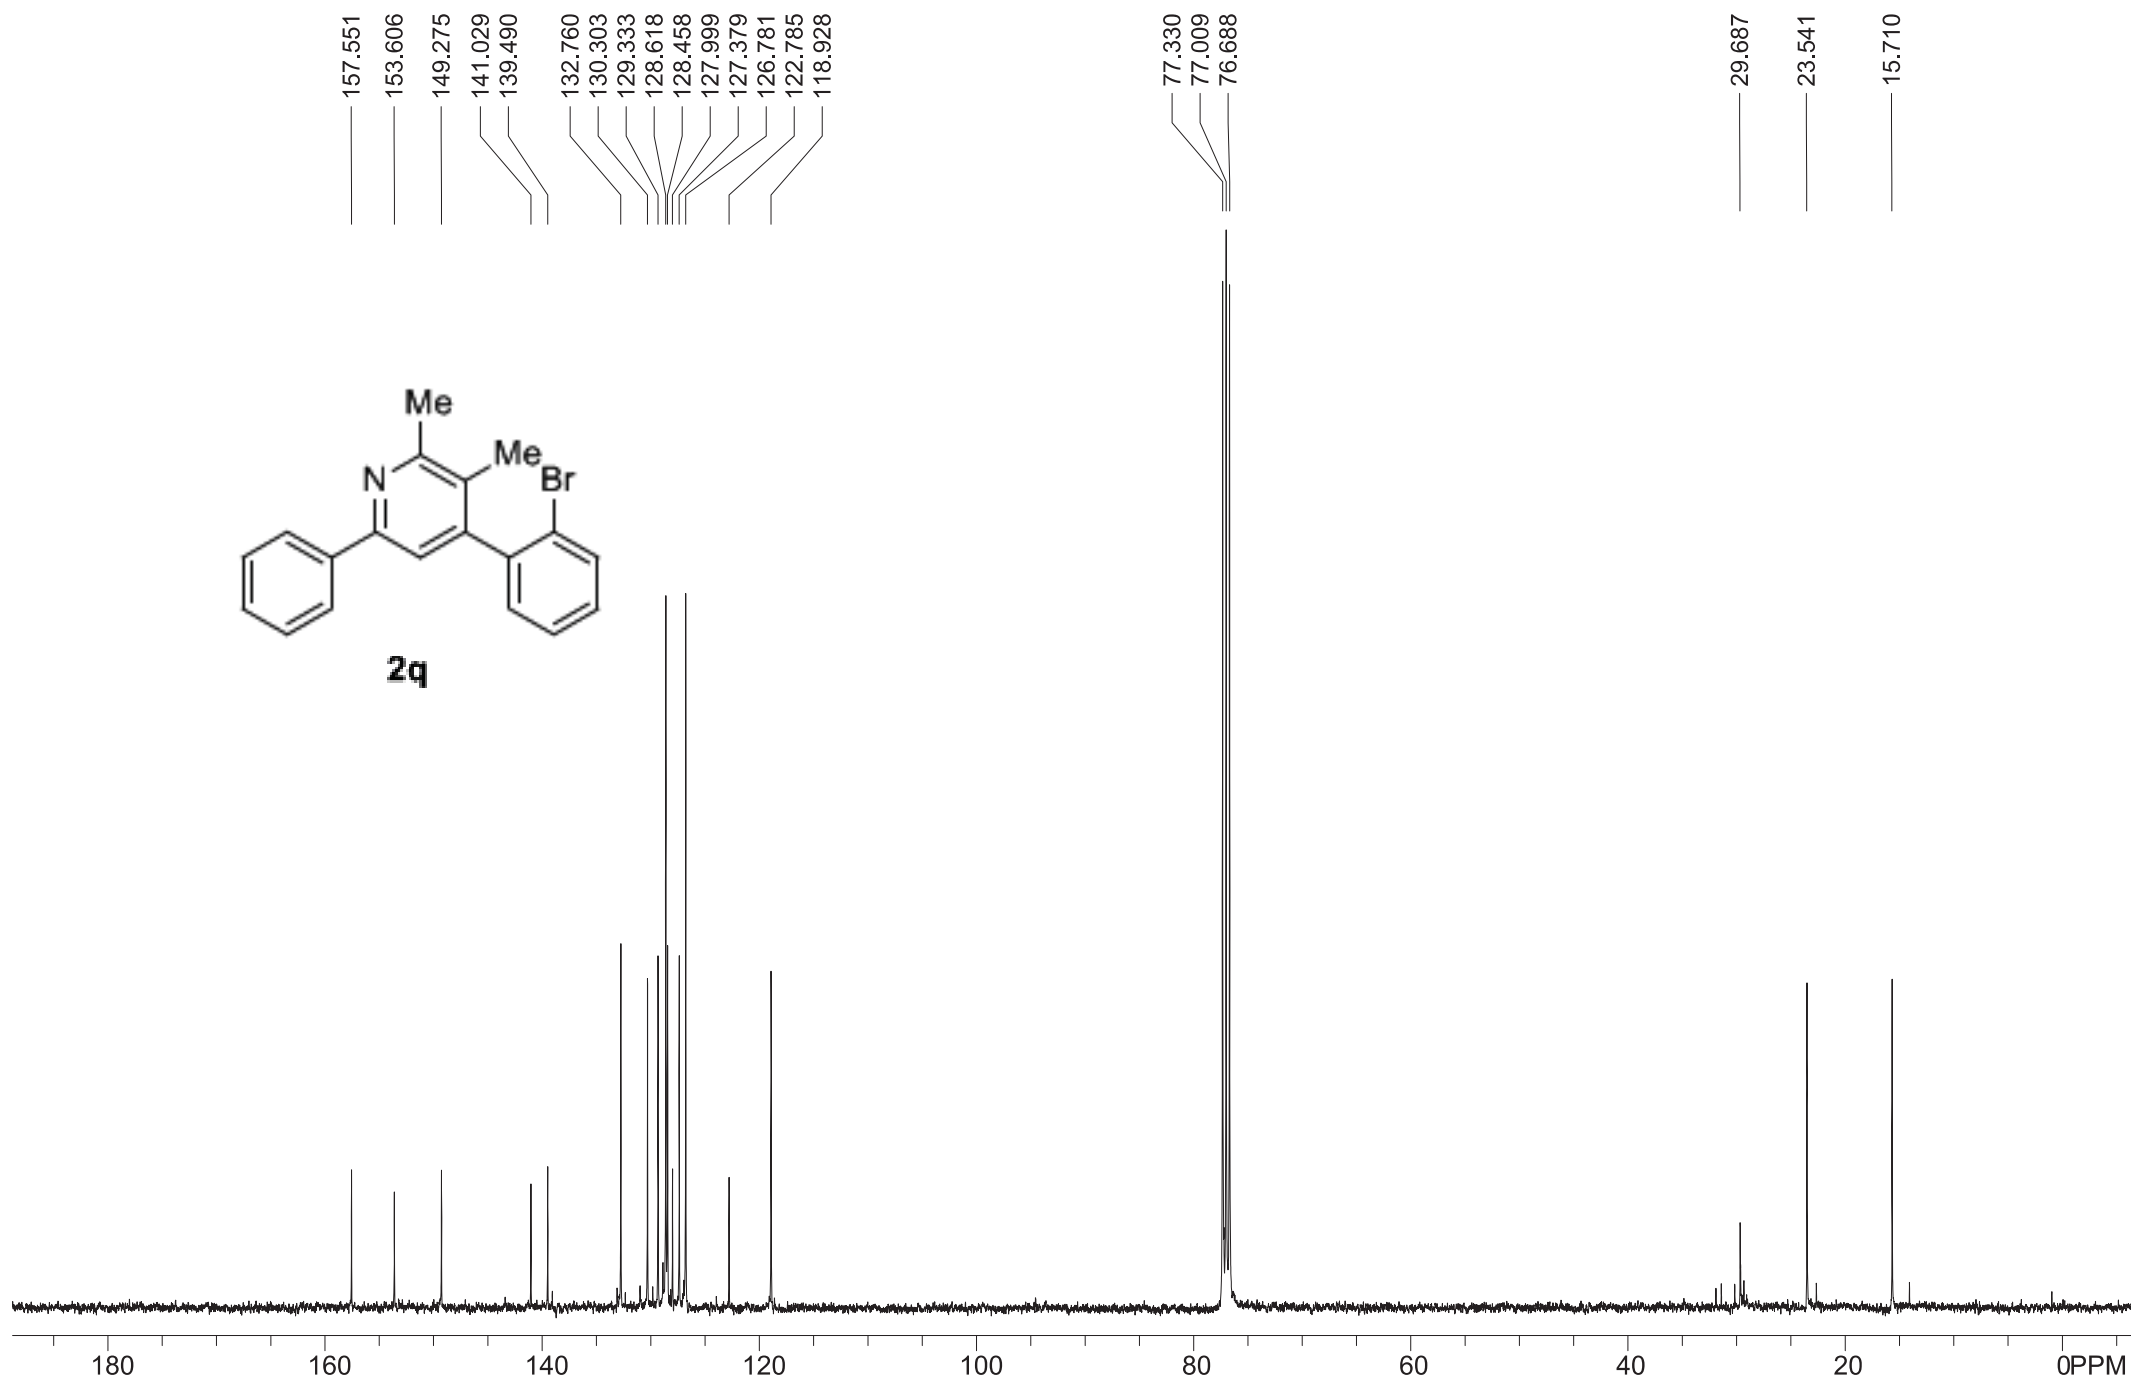

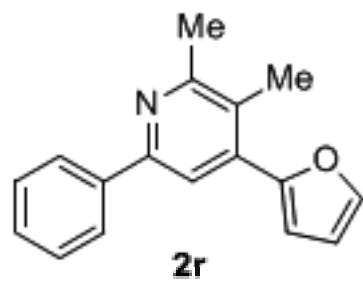

8.040  
8.022  
7.848  
7.589  
7.486  
7.468  
7.449  
7.406  
7.388  
7.369  
7.260  
6.734  
6.728  
6.567

2.684  
2.466

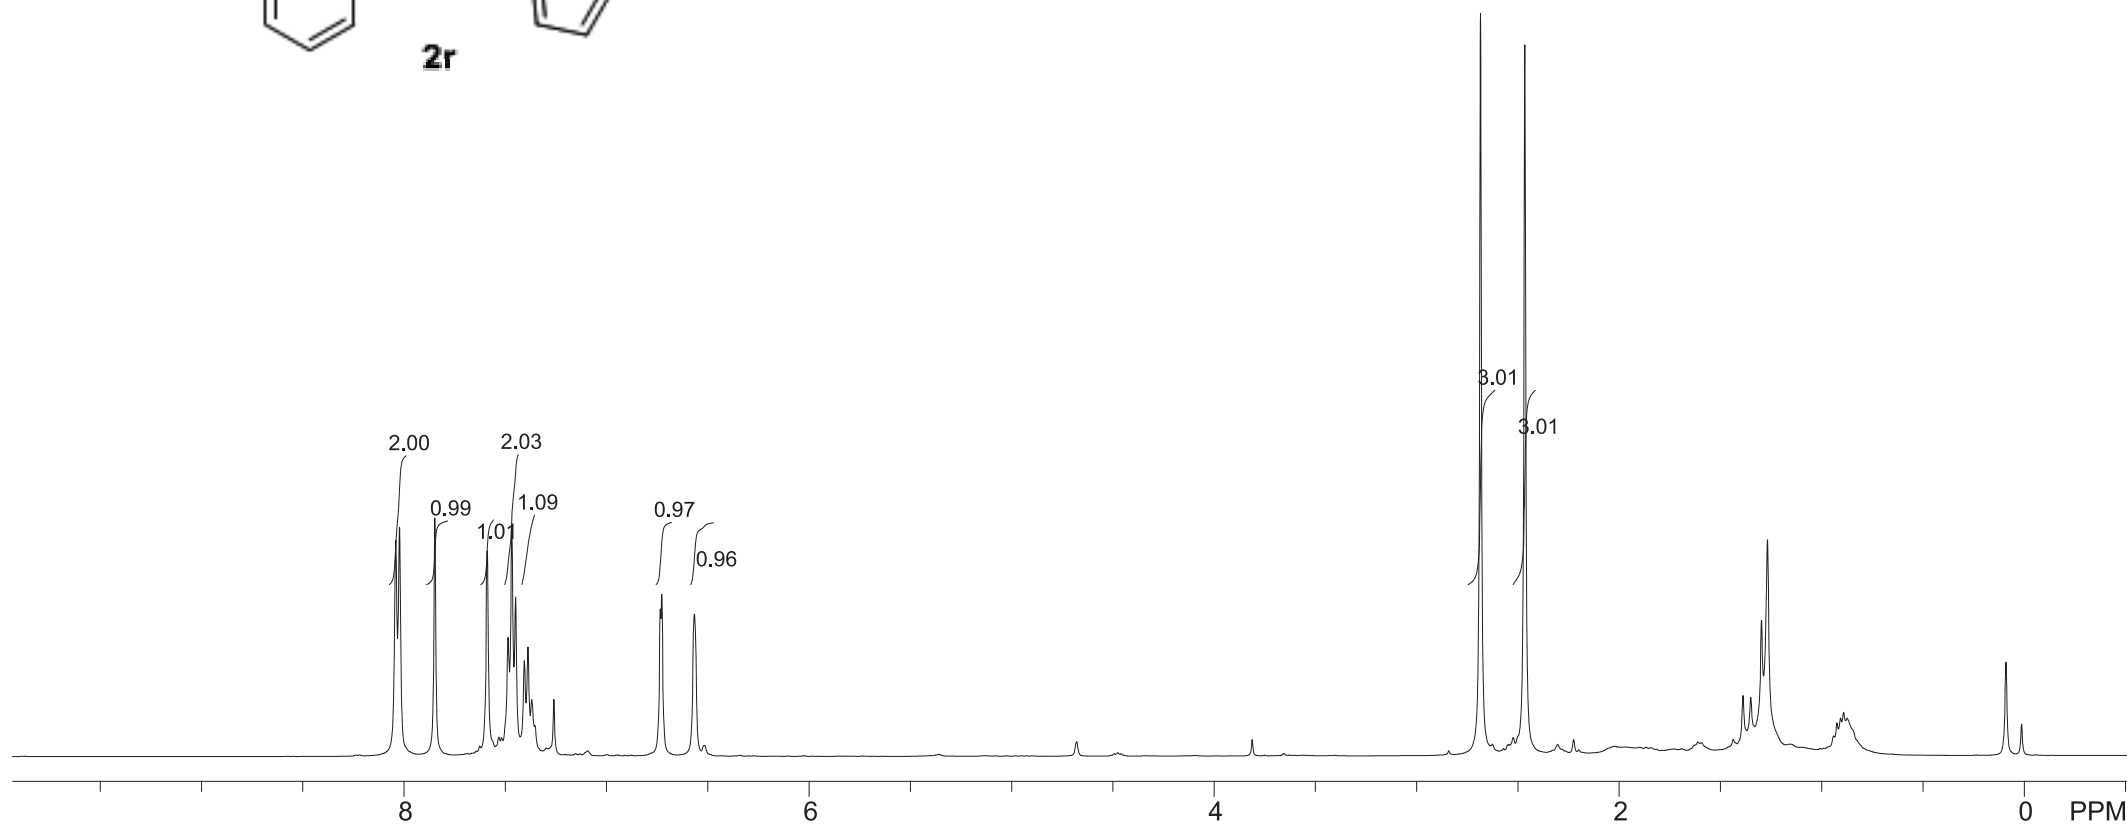

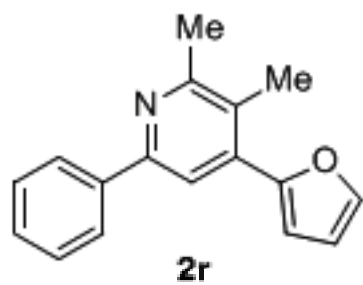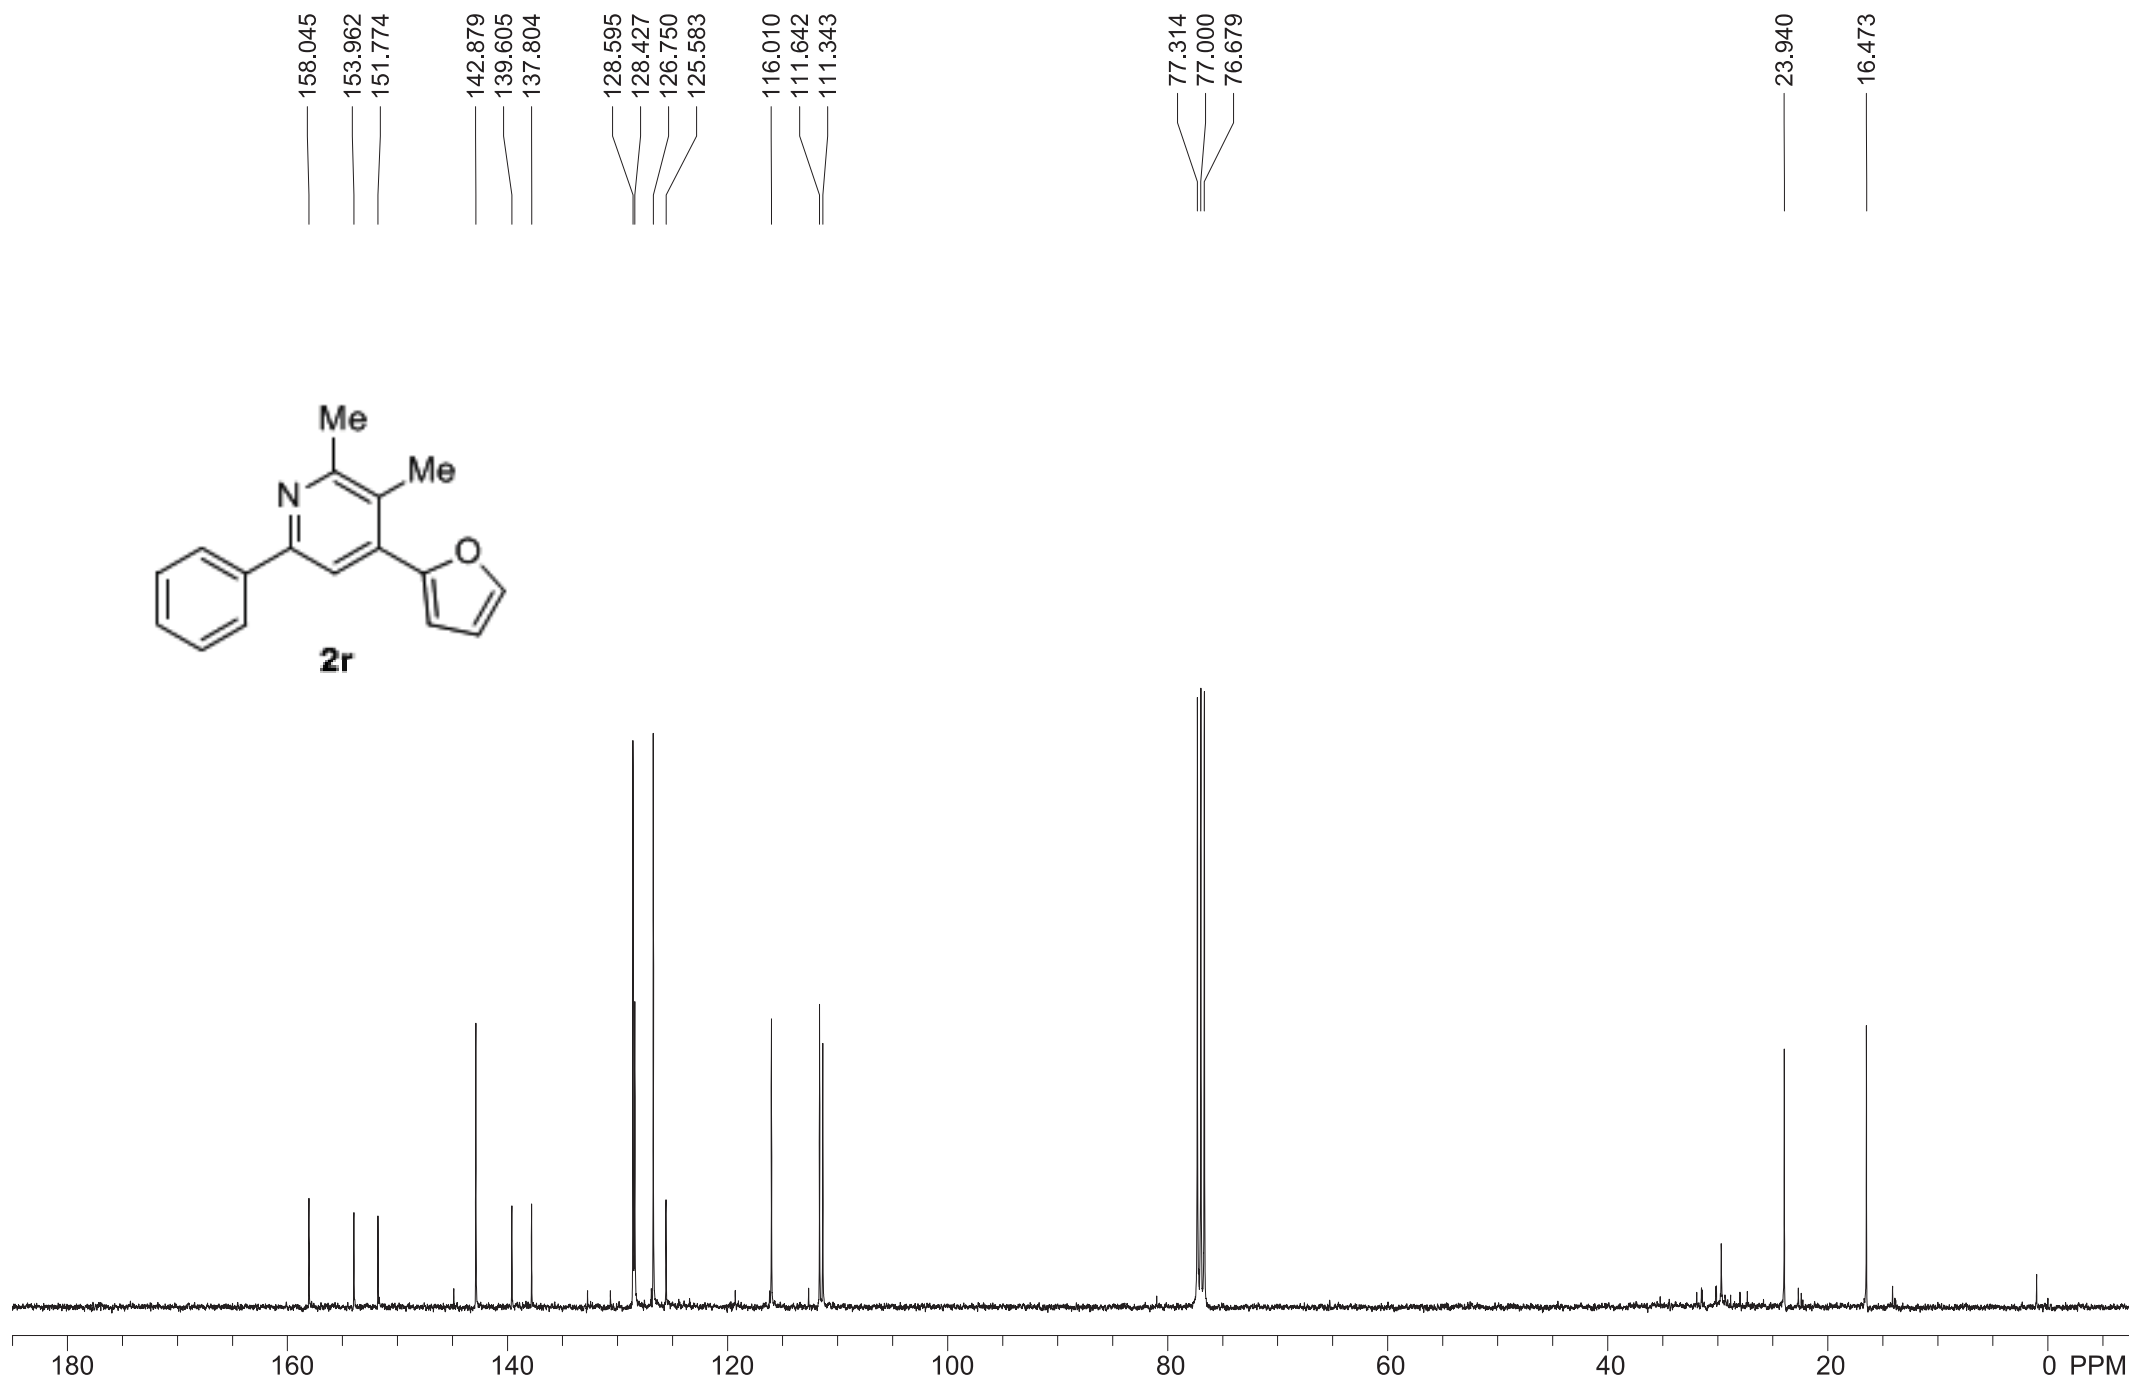

8.028  
8.023  
8.019  
8.004  
8.001  
7.588  
7.487  
7.484  
7.467  
7.448  
7.441  
7.437  
7.429  
7.426  
7.413  
7.410  
7.393  
7.374  
7.260  
7.162  
7.149  
7.141

2.685  
2.397

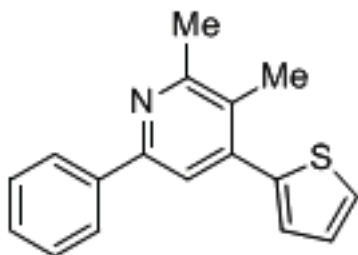

**2s**

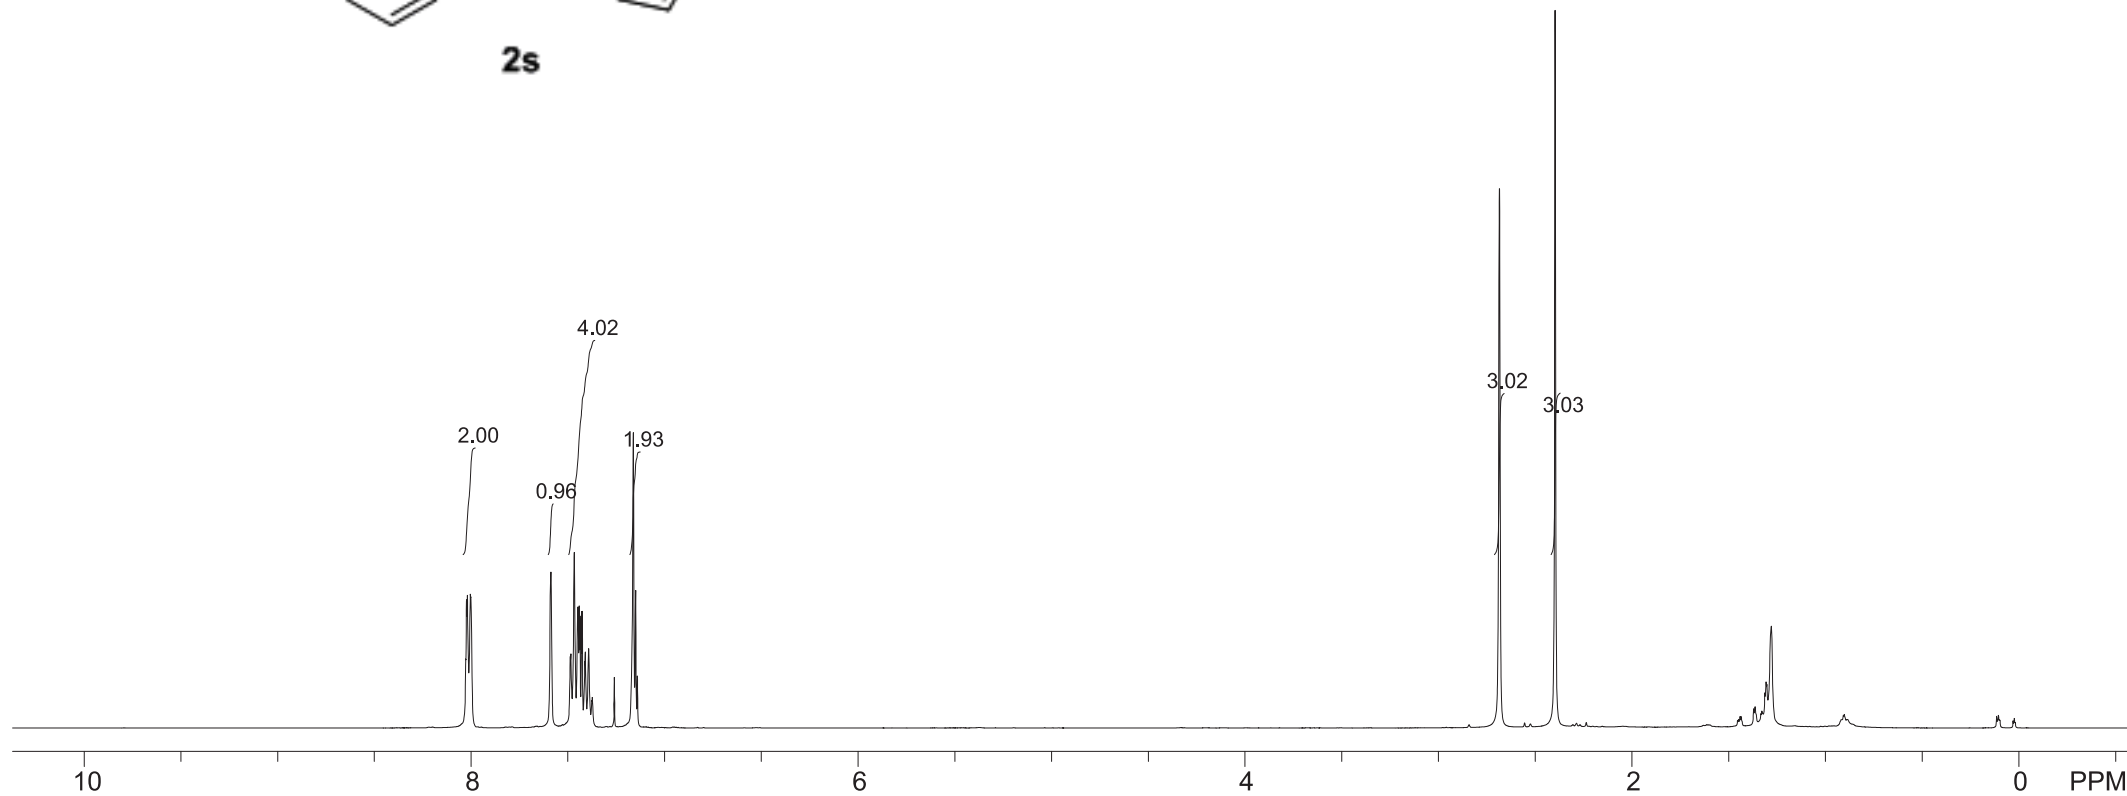



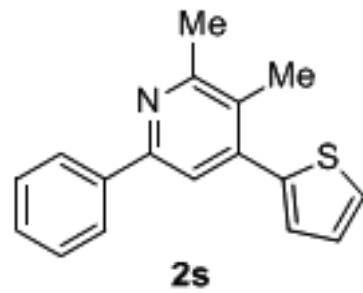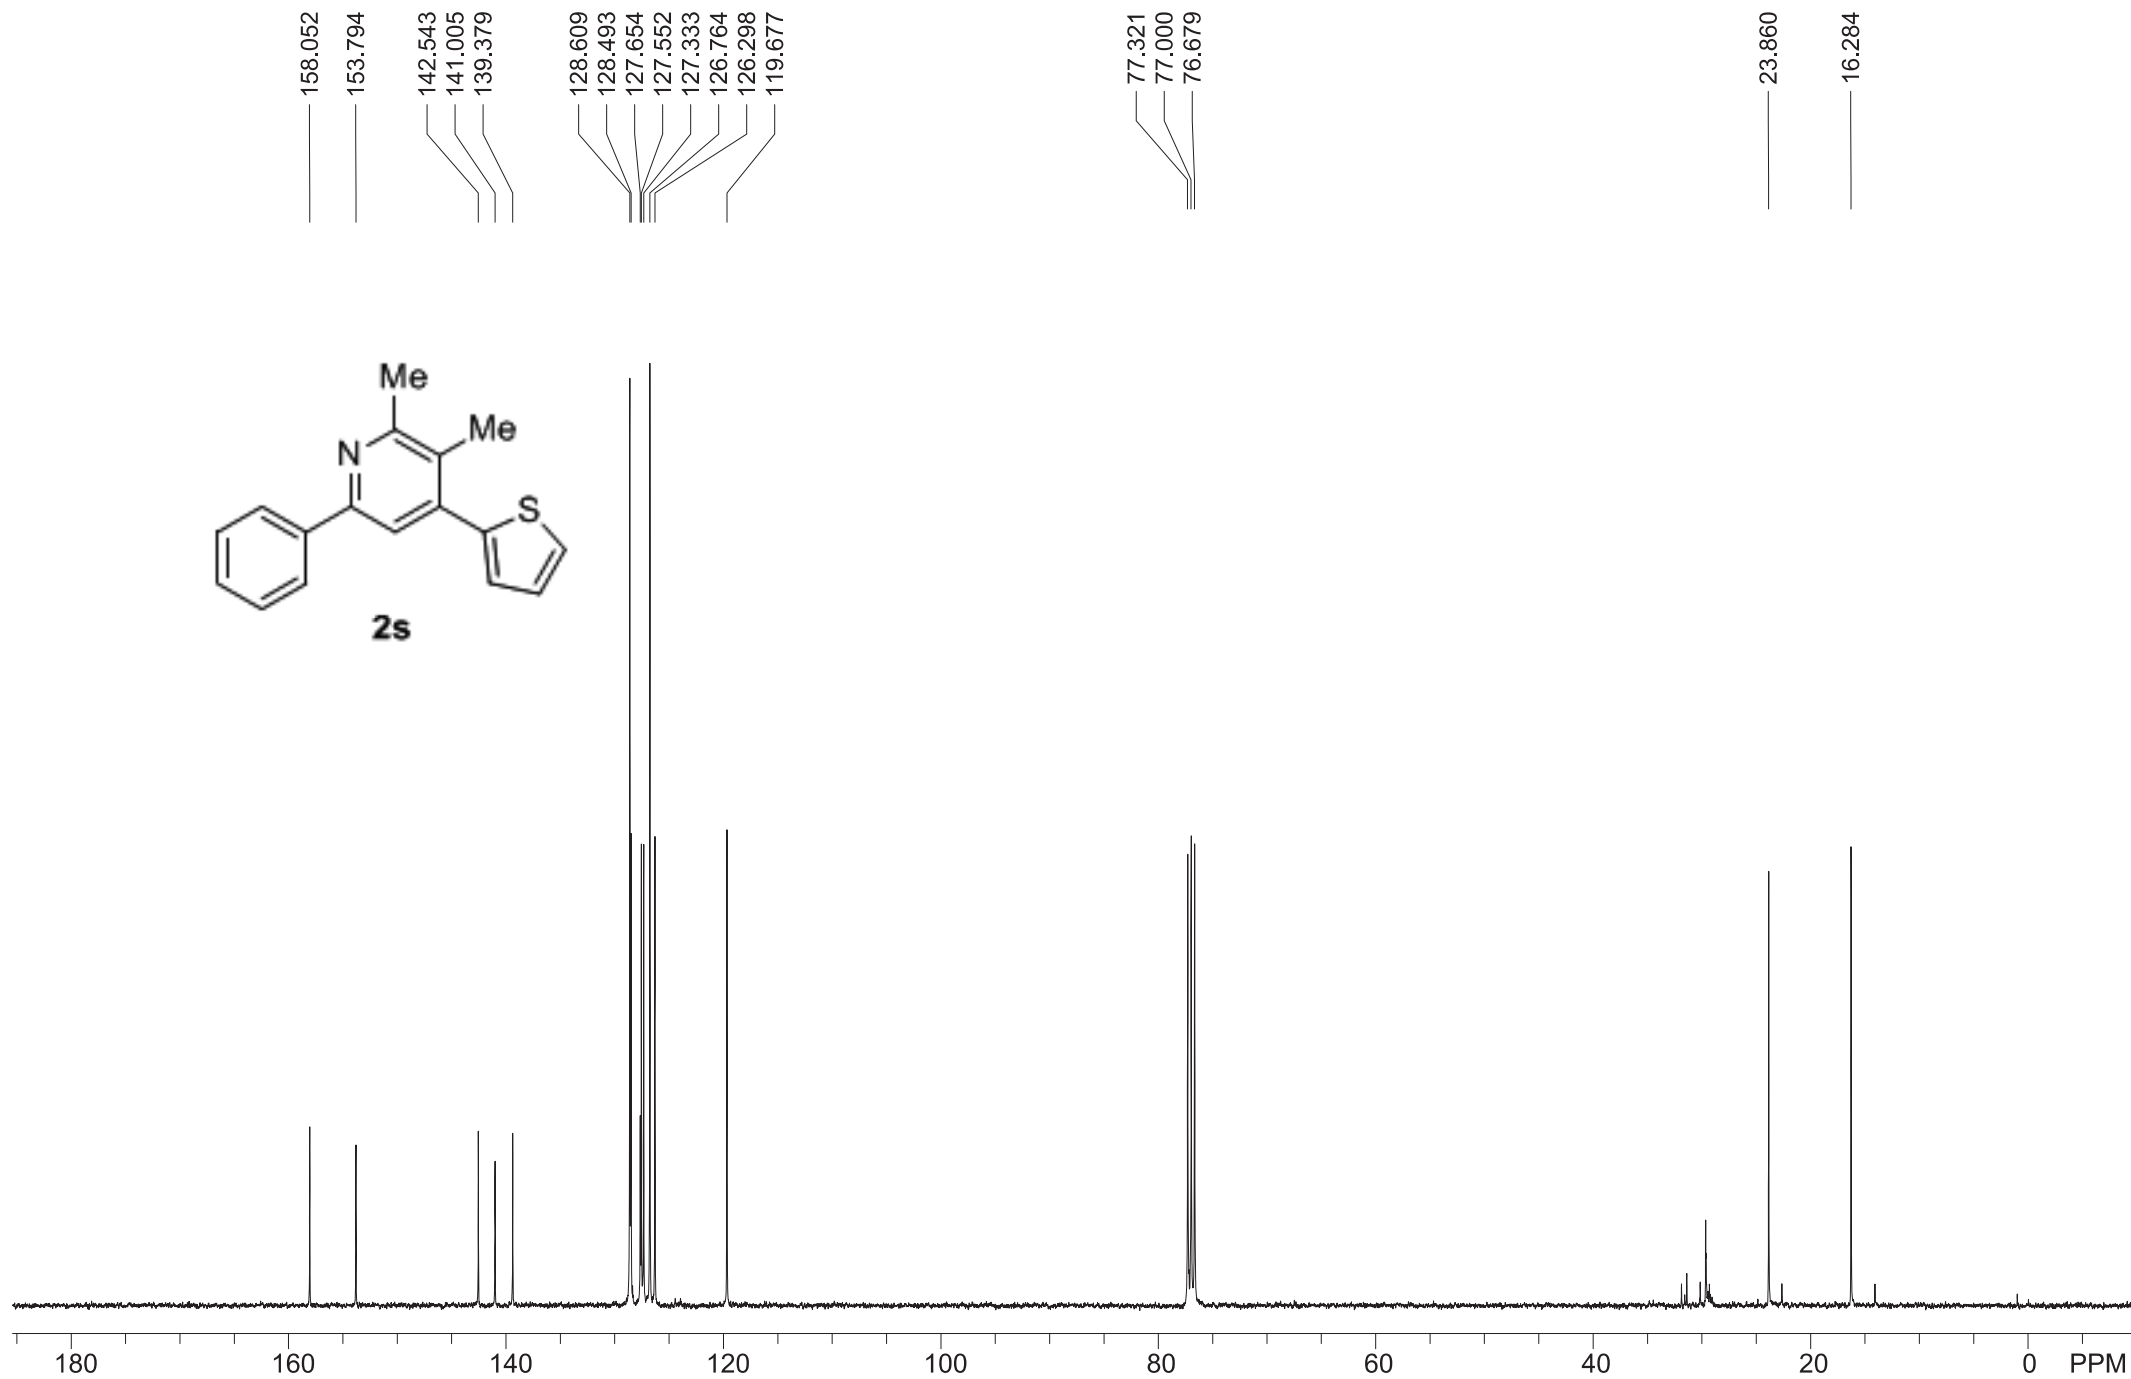

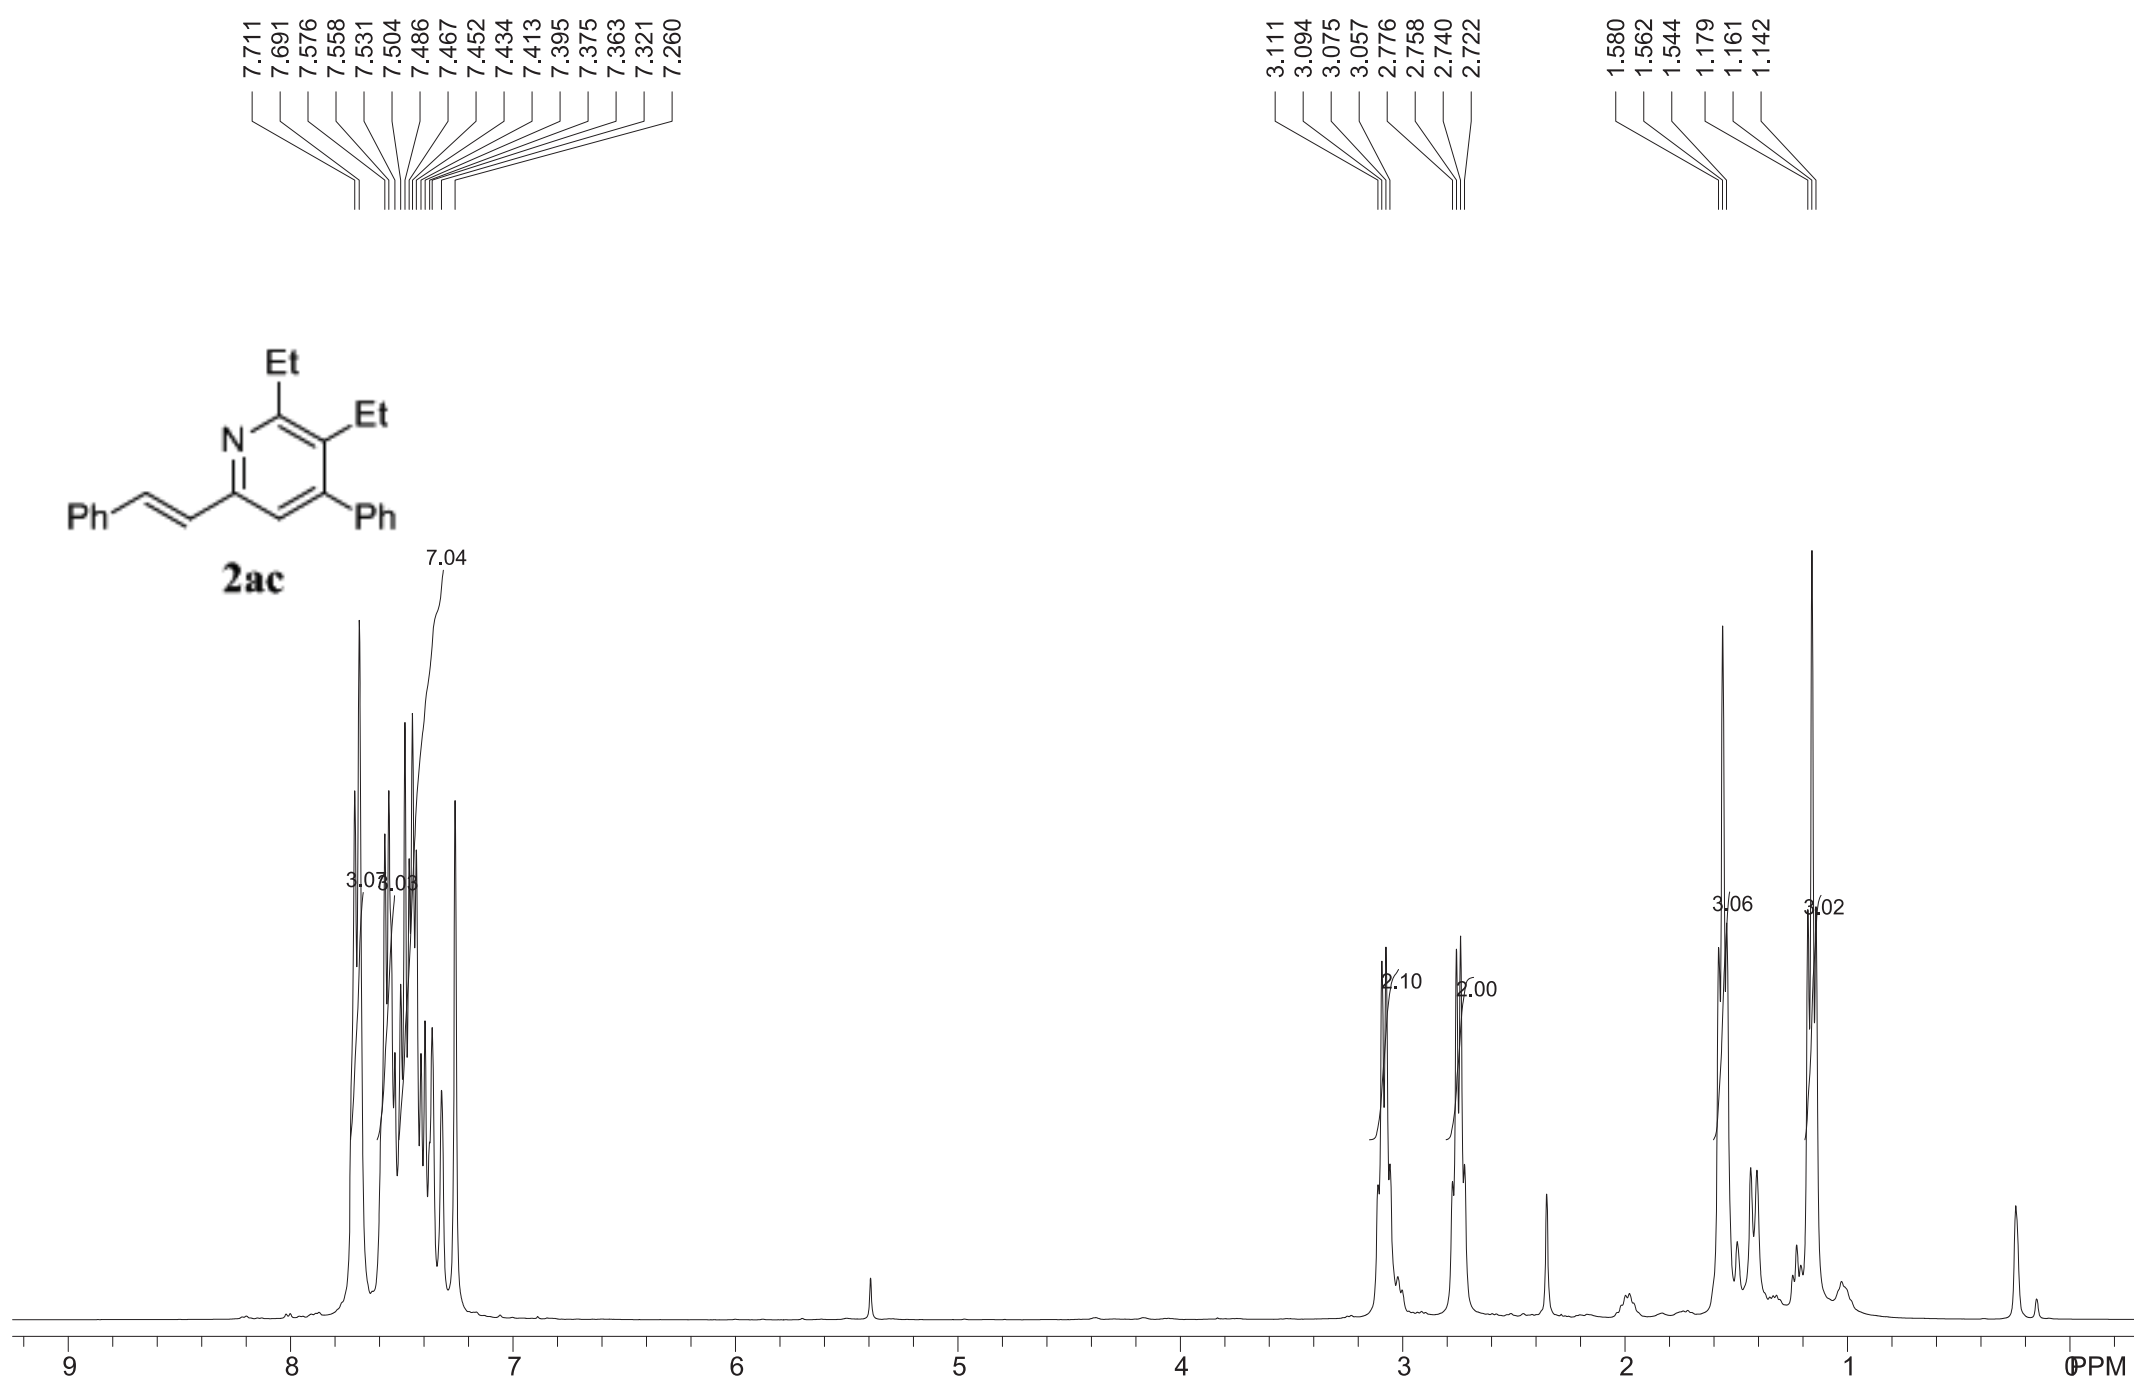

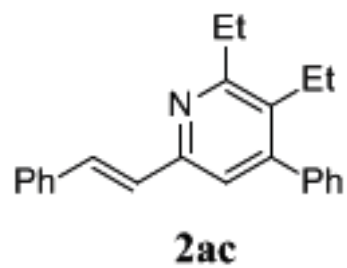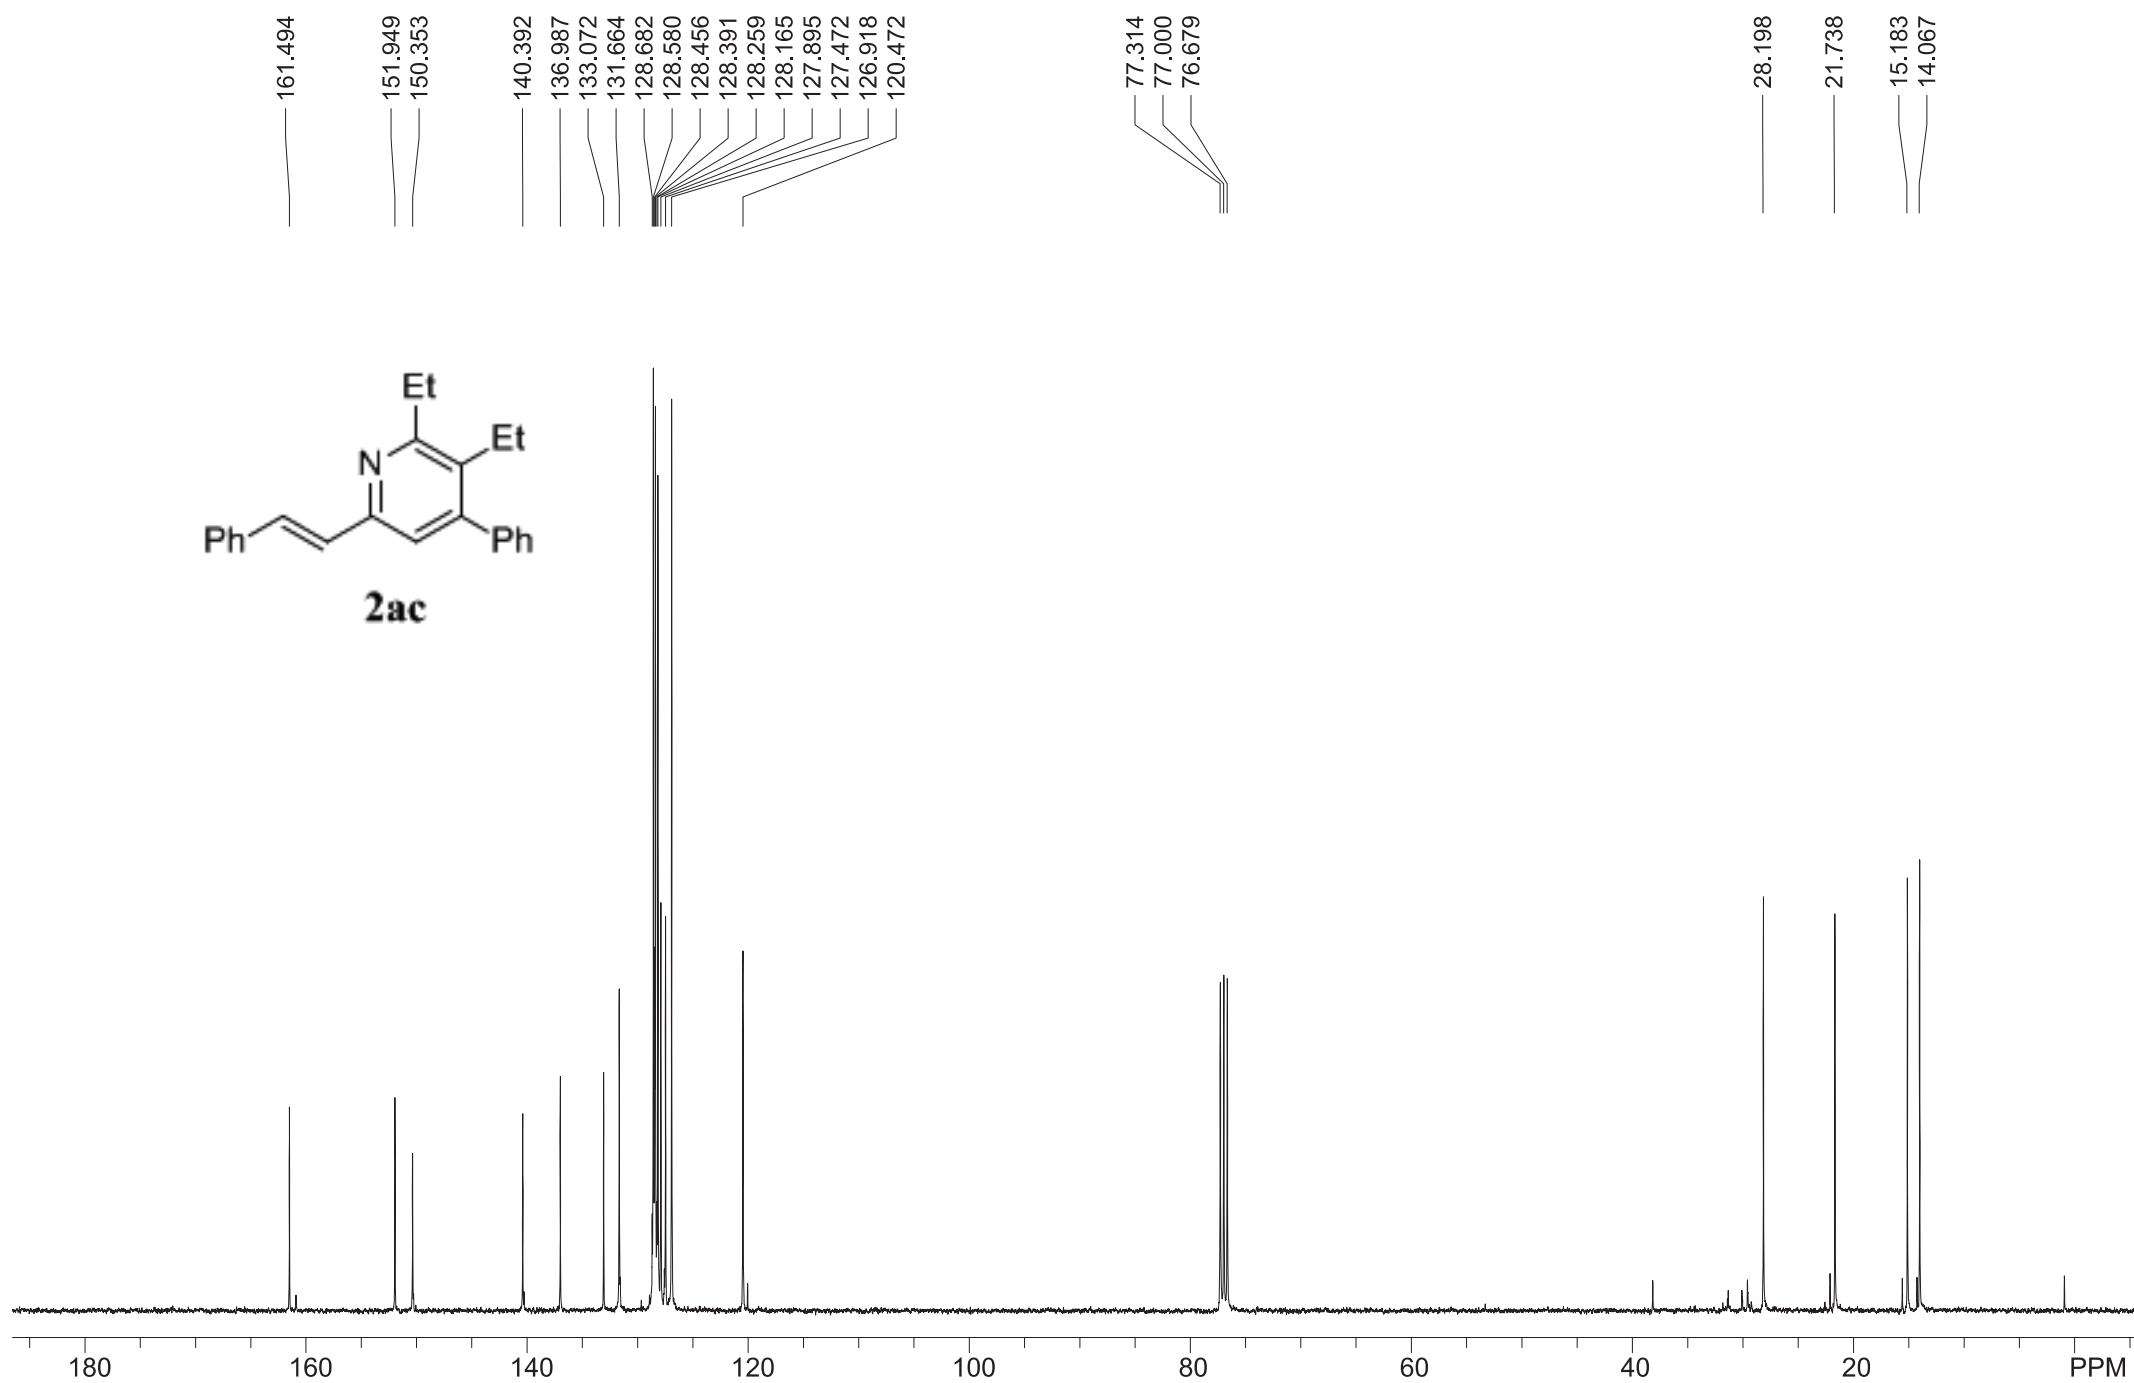

7.471  
7.455  
7.439  
7.391  
7.373  
7.355  
7.336  
7.319  
7.301  
7.284  
7.262  
7.243  
7.220  
7.191  
7.179  
7.160  
7.152

2.570  
2.553  
2.535  
2.517

0.666  
0.648  
0.630

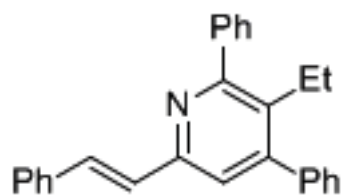

**2ad**

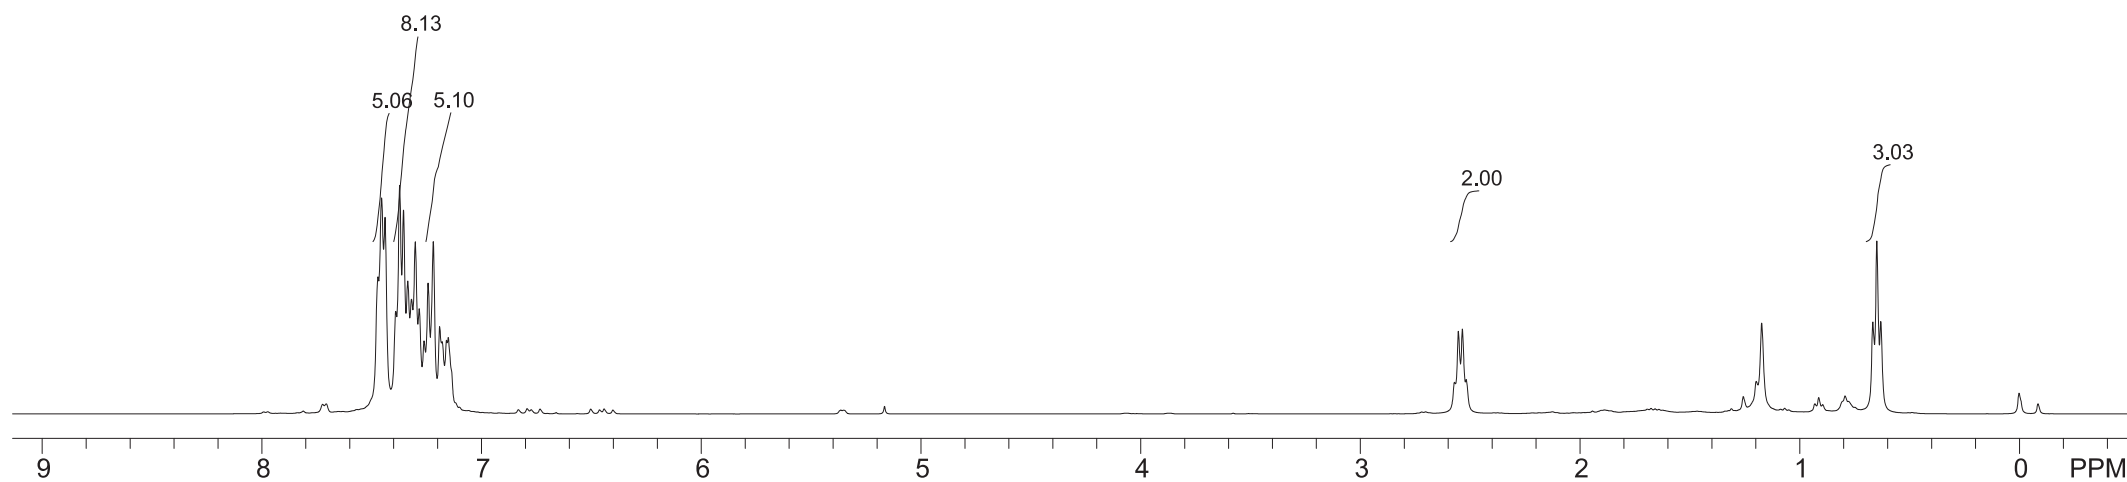

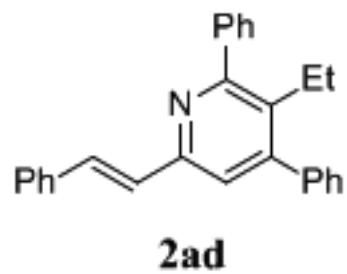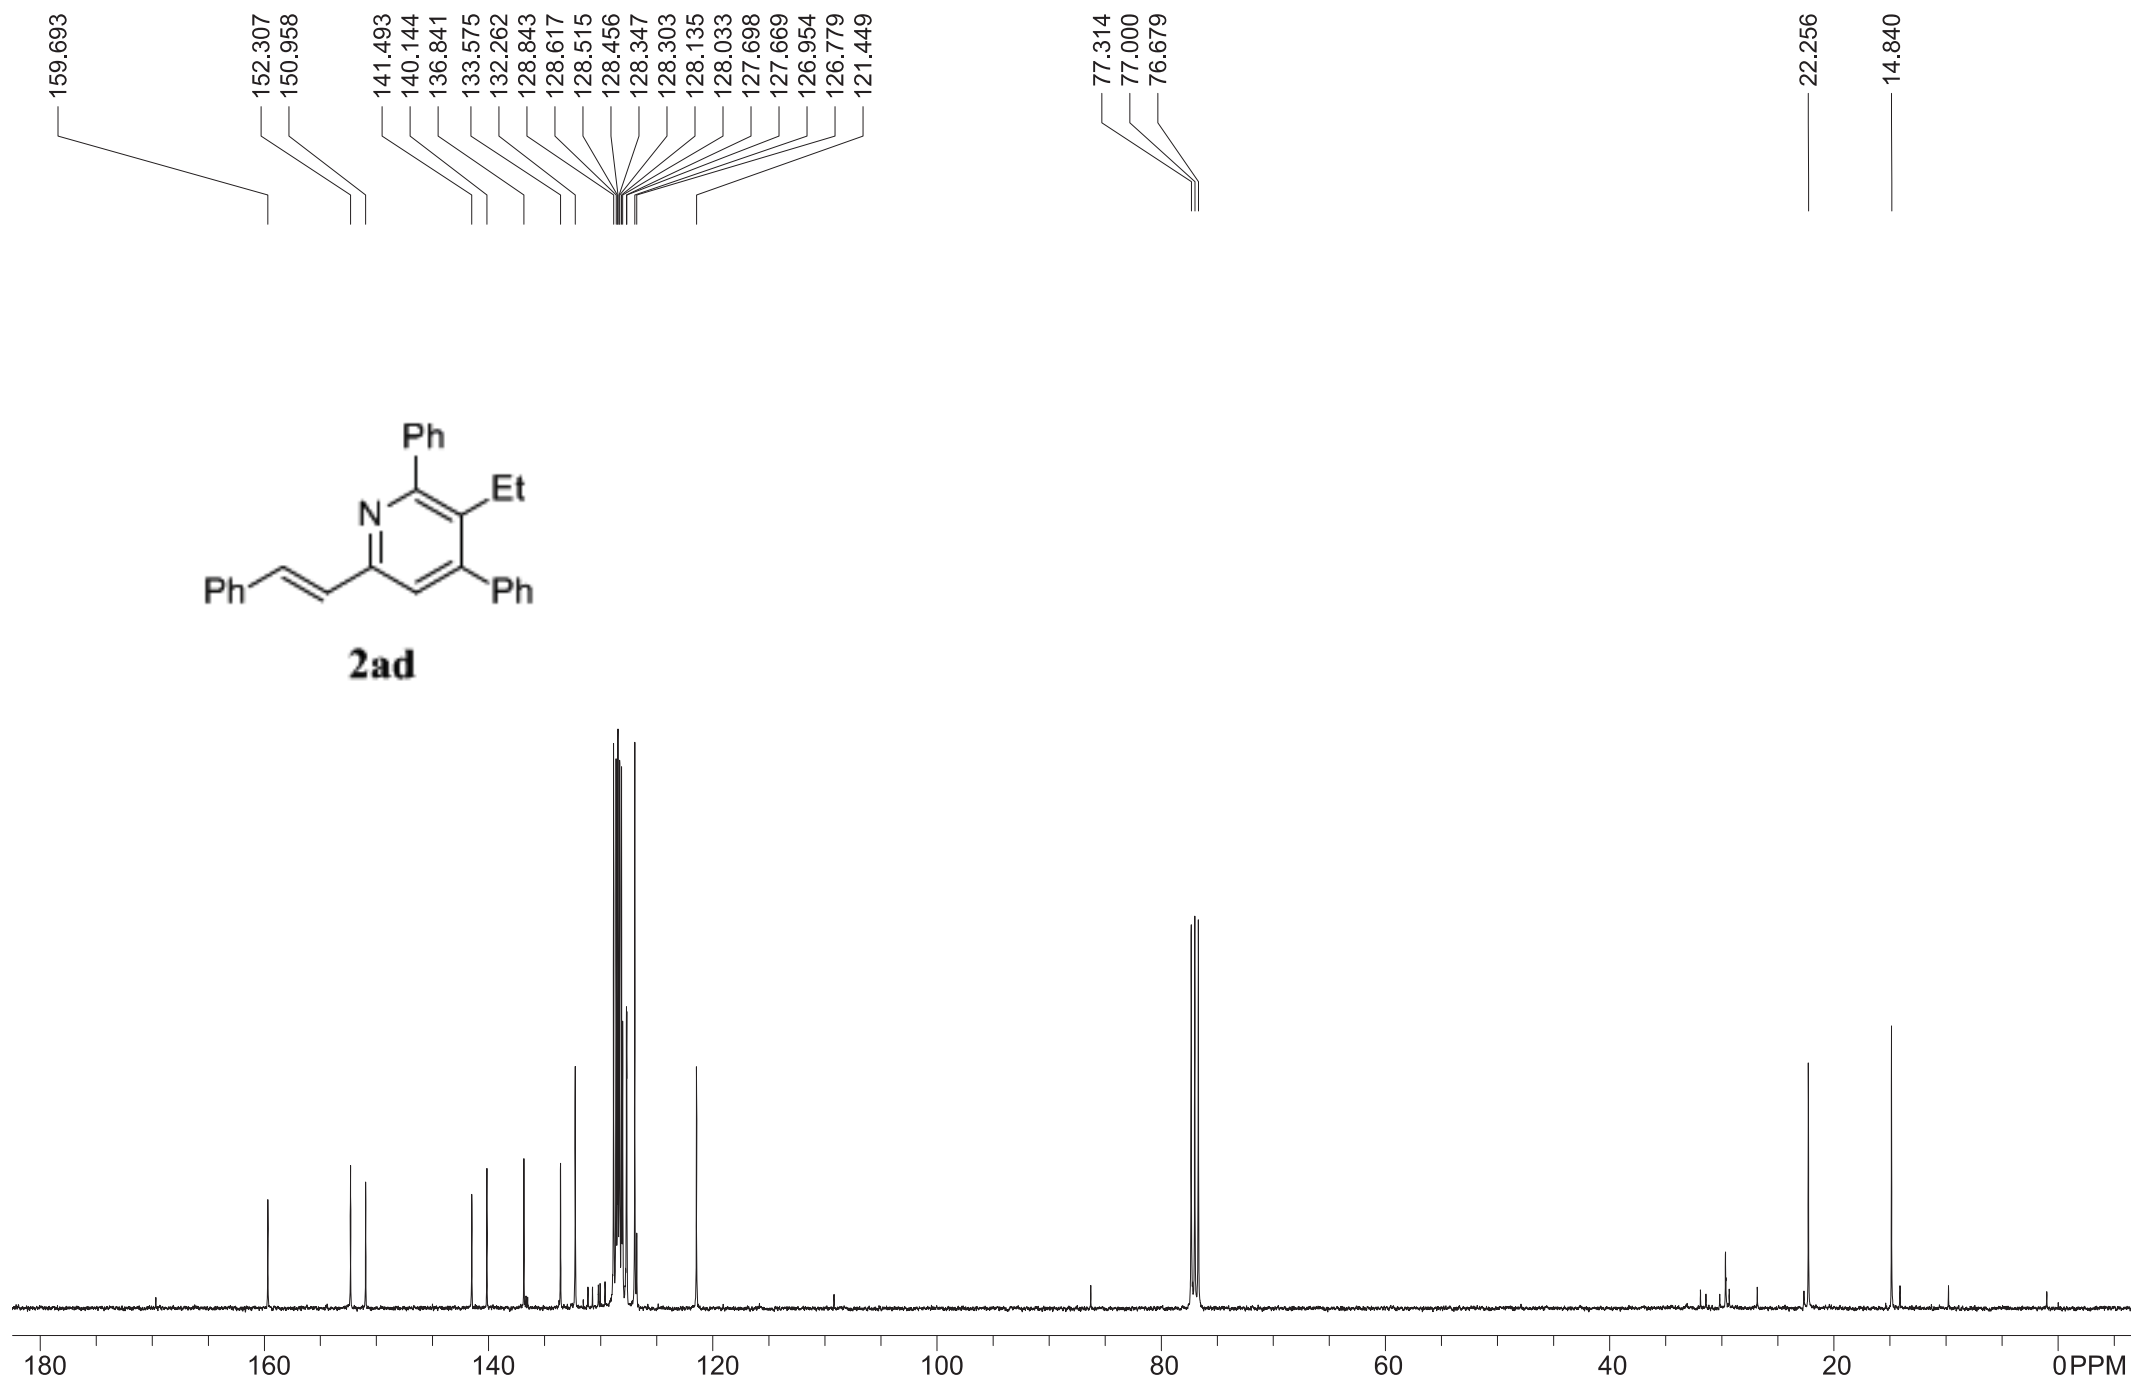

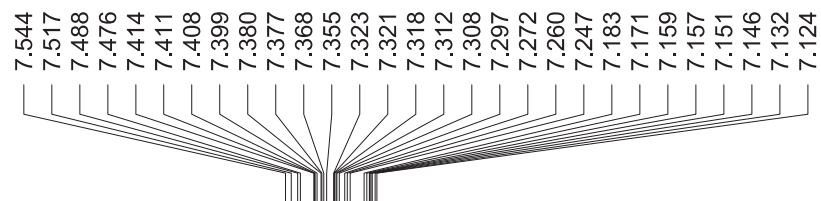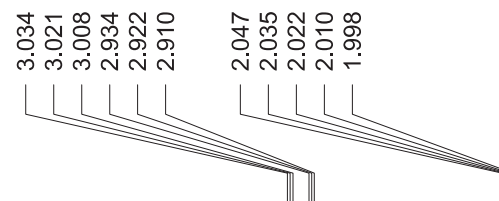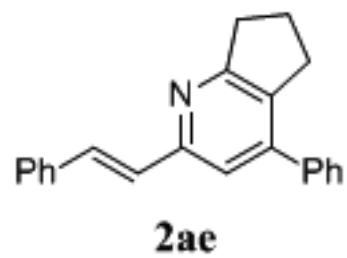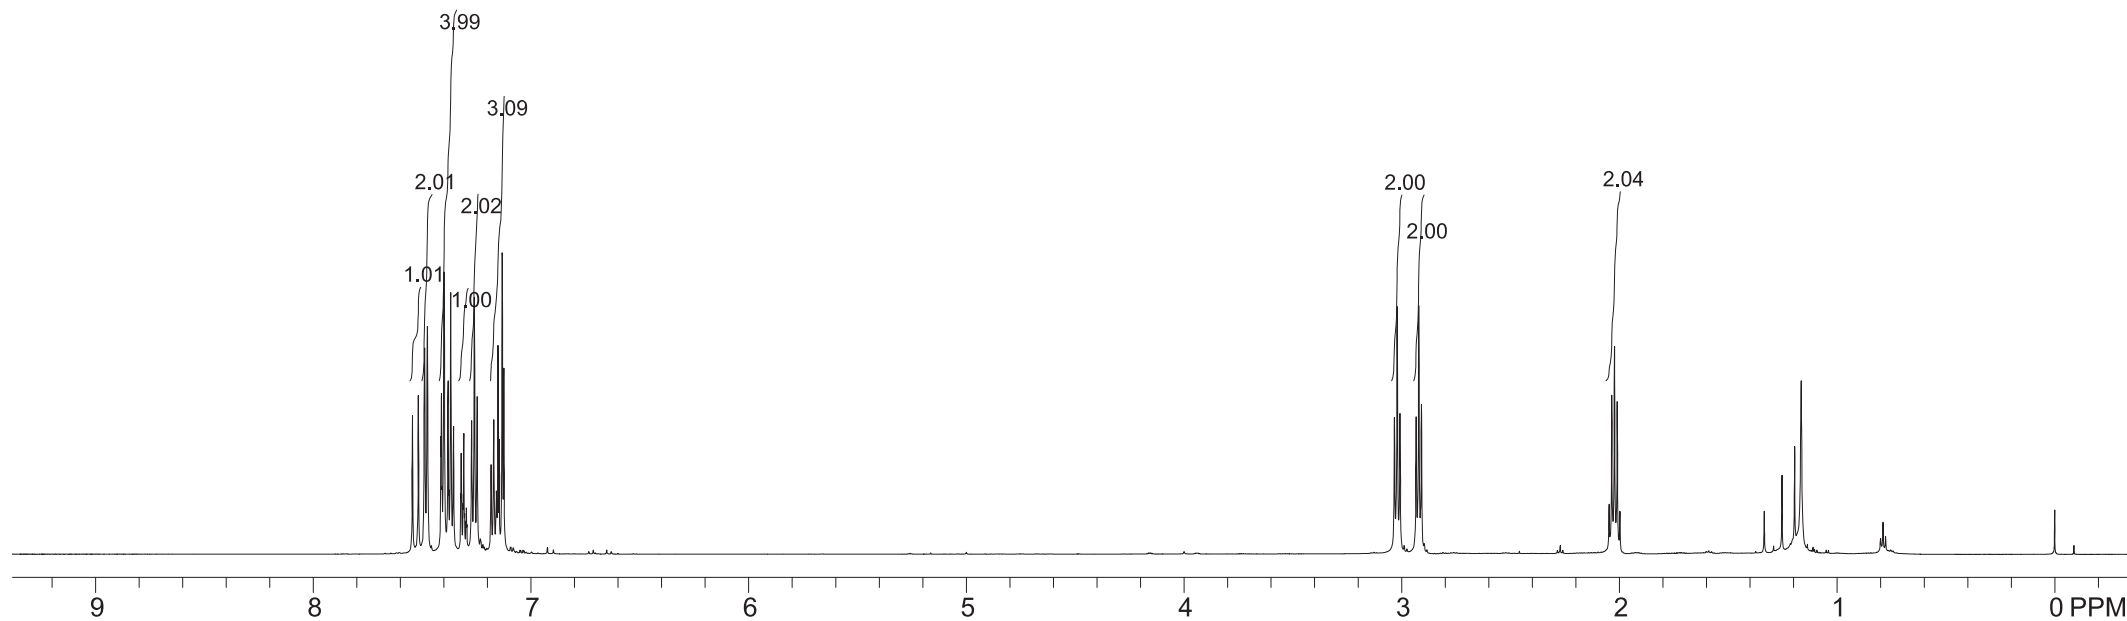

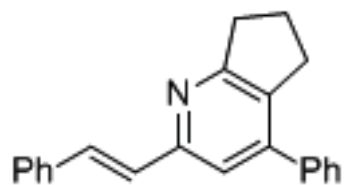

**2ae**

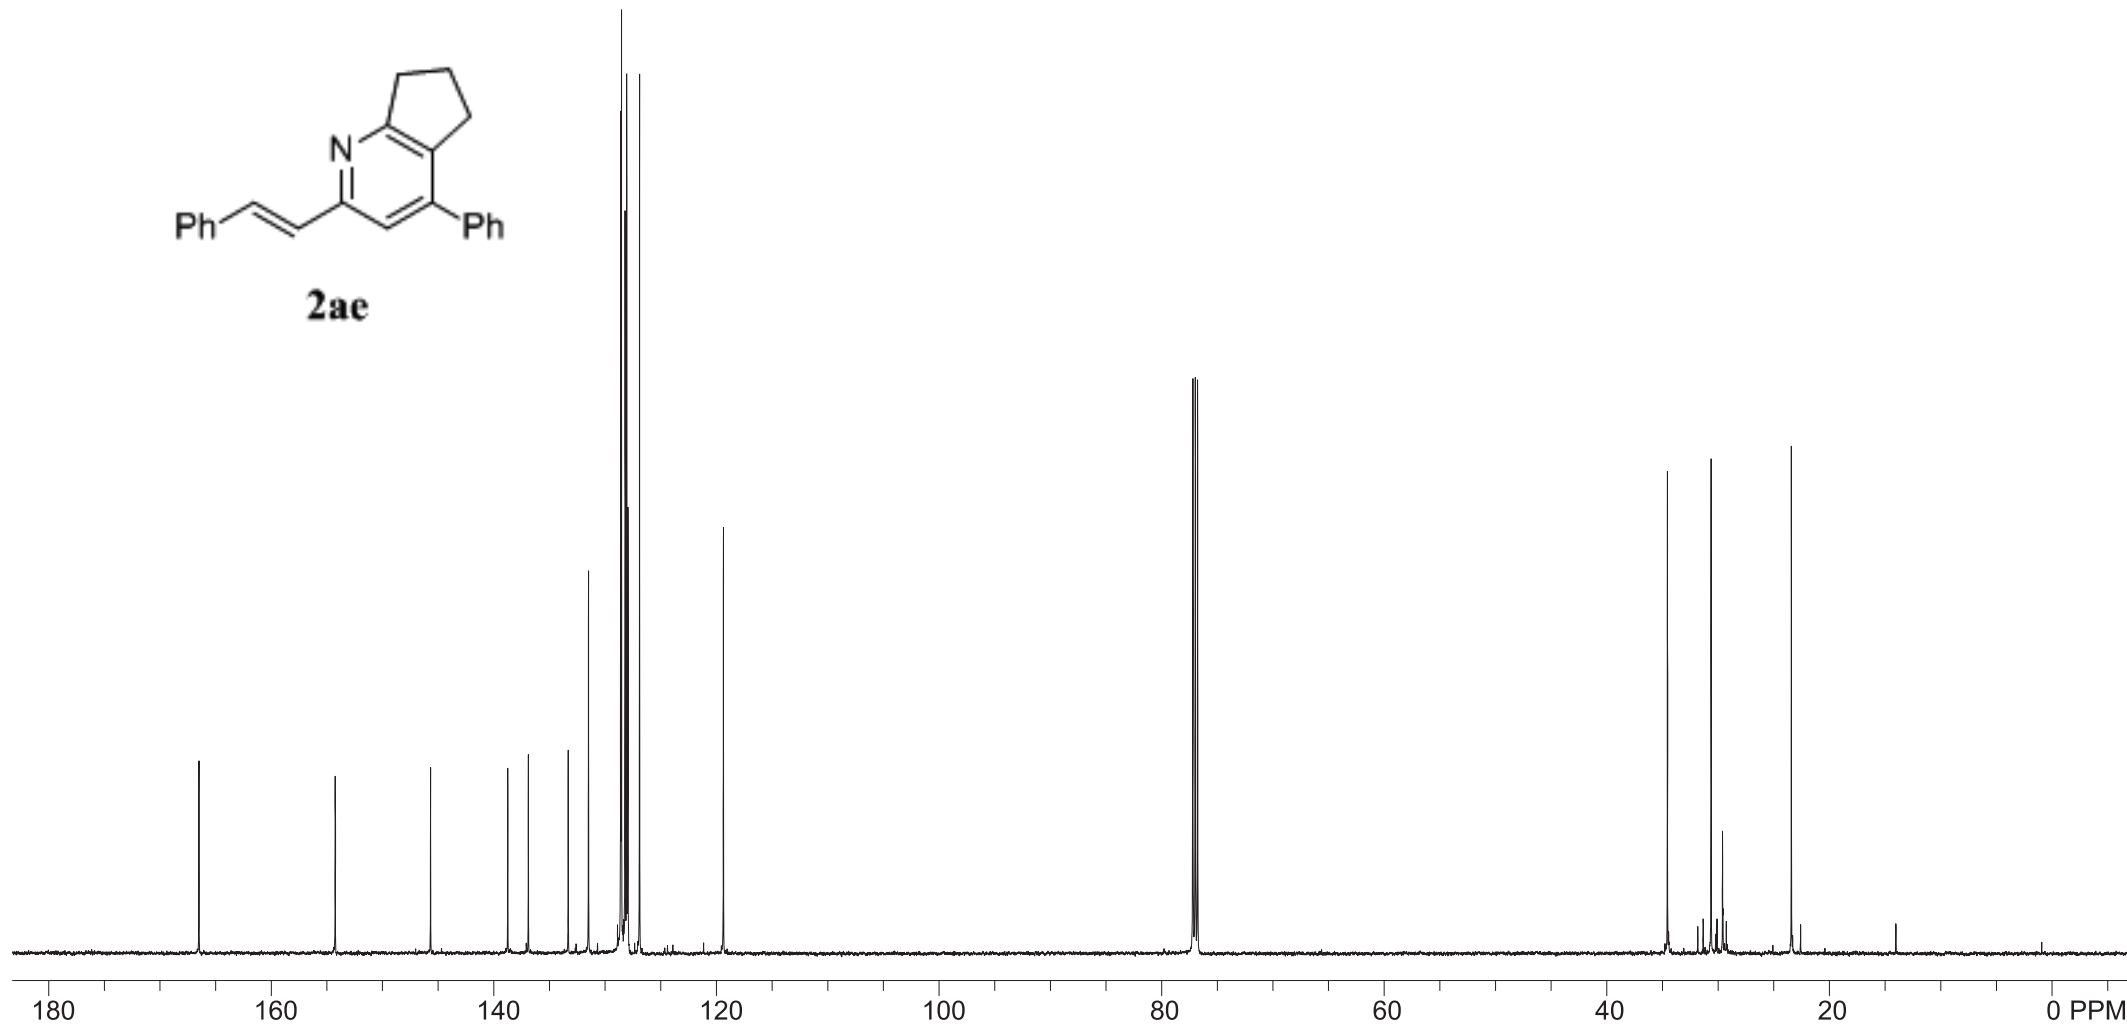

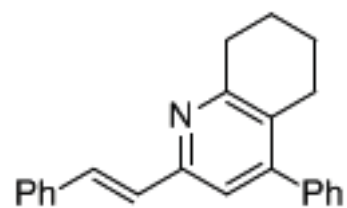

**2af**

7.567  
7.552  
7.518  
7.486  
7.461  
7.447  
7.433  
7.410  
7.396  
7.381  
7.367  
7.352  
7.331  
7.316  
7.281  
7.266  
7.251  
7.212  
7.178

3.051  
3.038  
3.026  
2.638  
2.626  
2.614  
1.933  
1.923  
1.911  
1.747  
1.735  
1.725

0.000

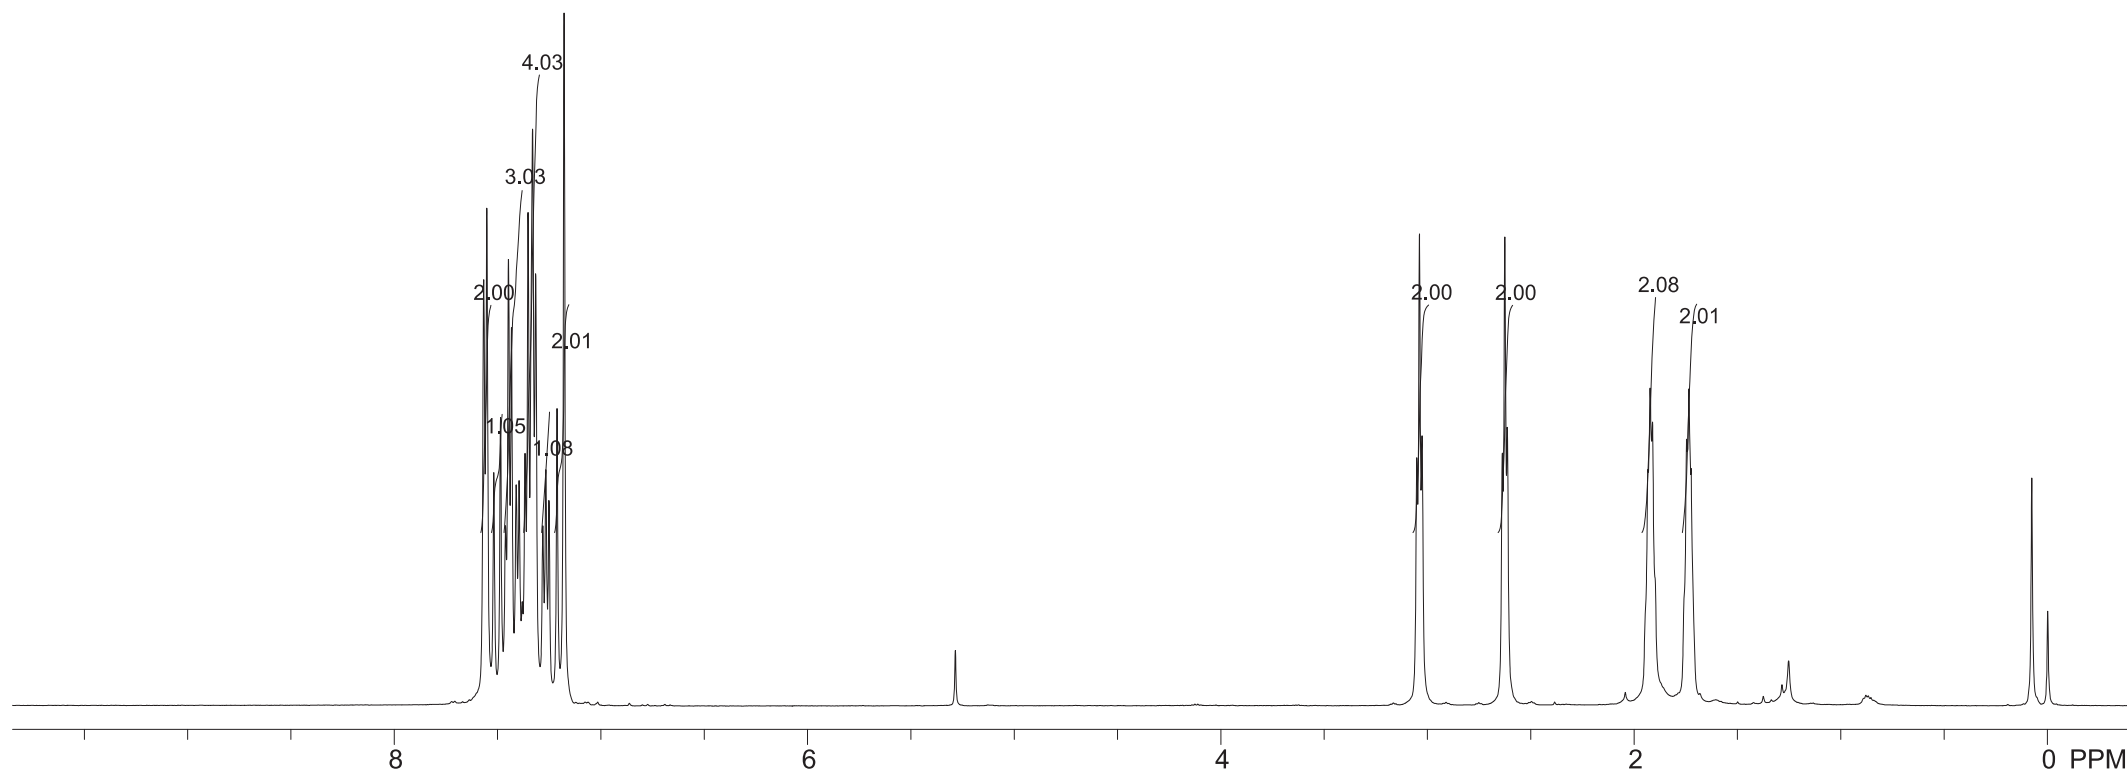



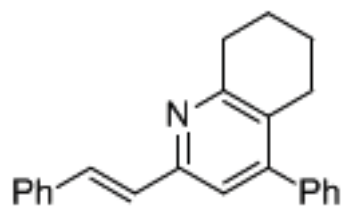

**2af**

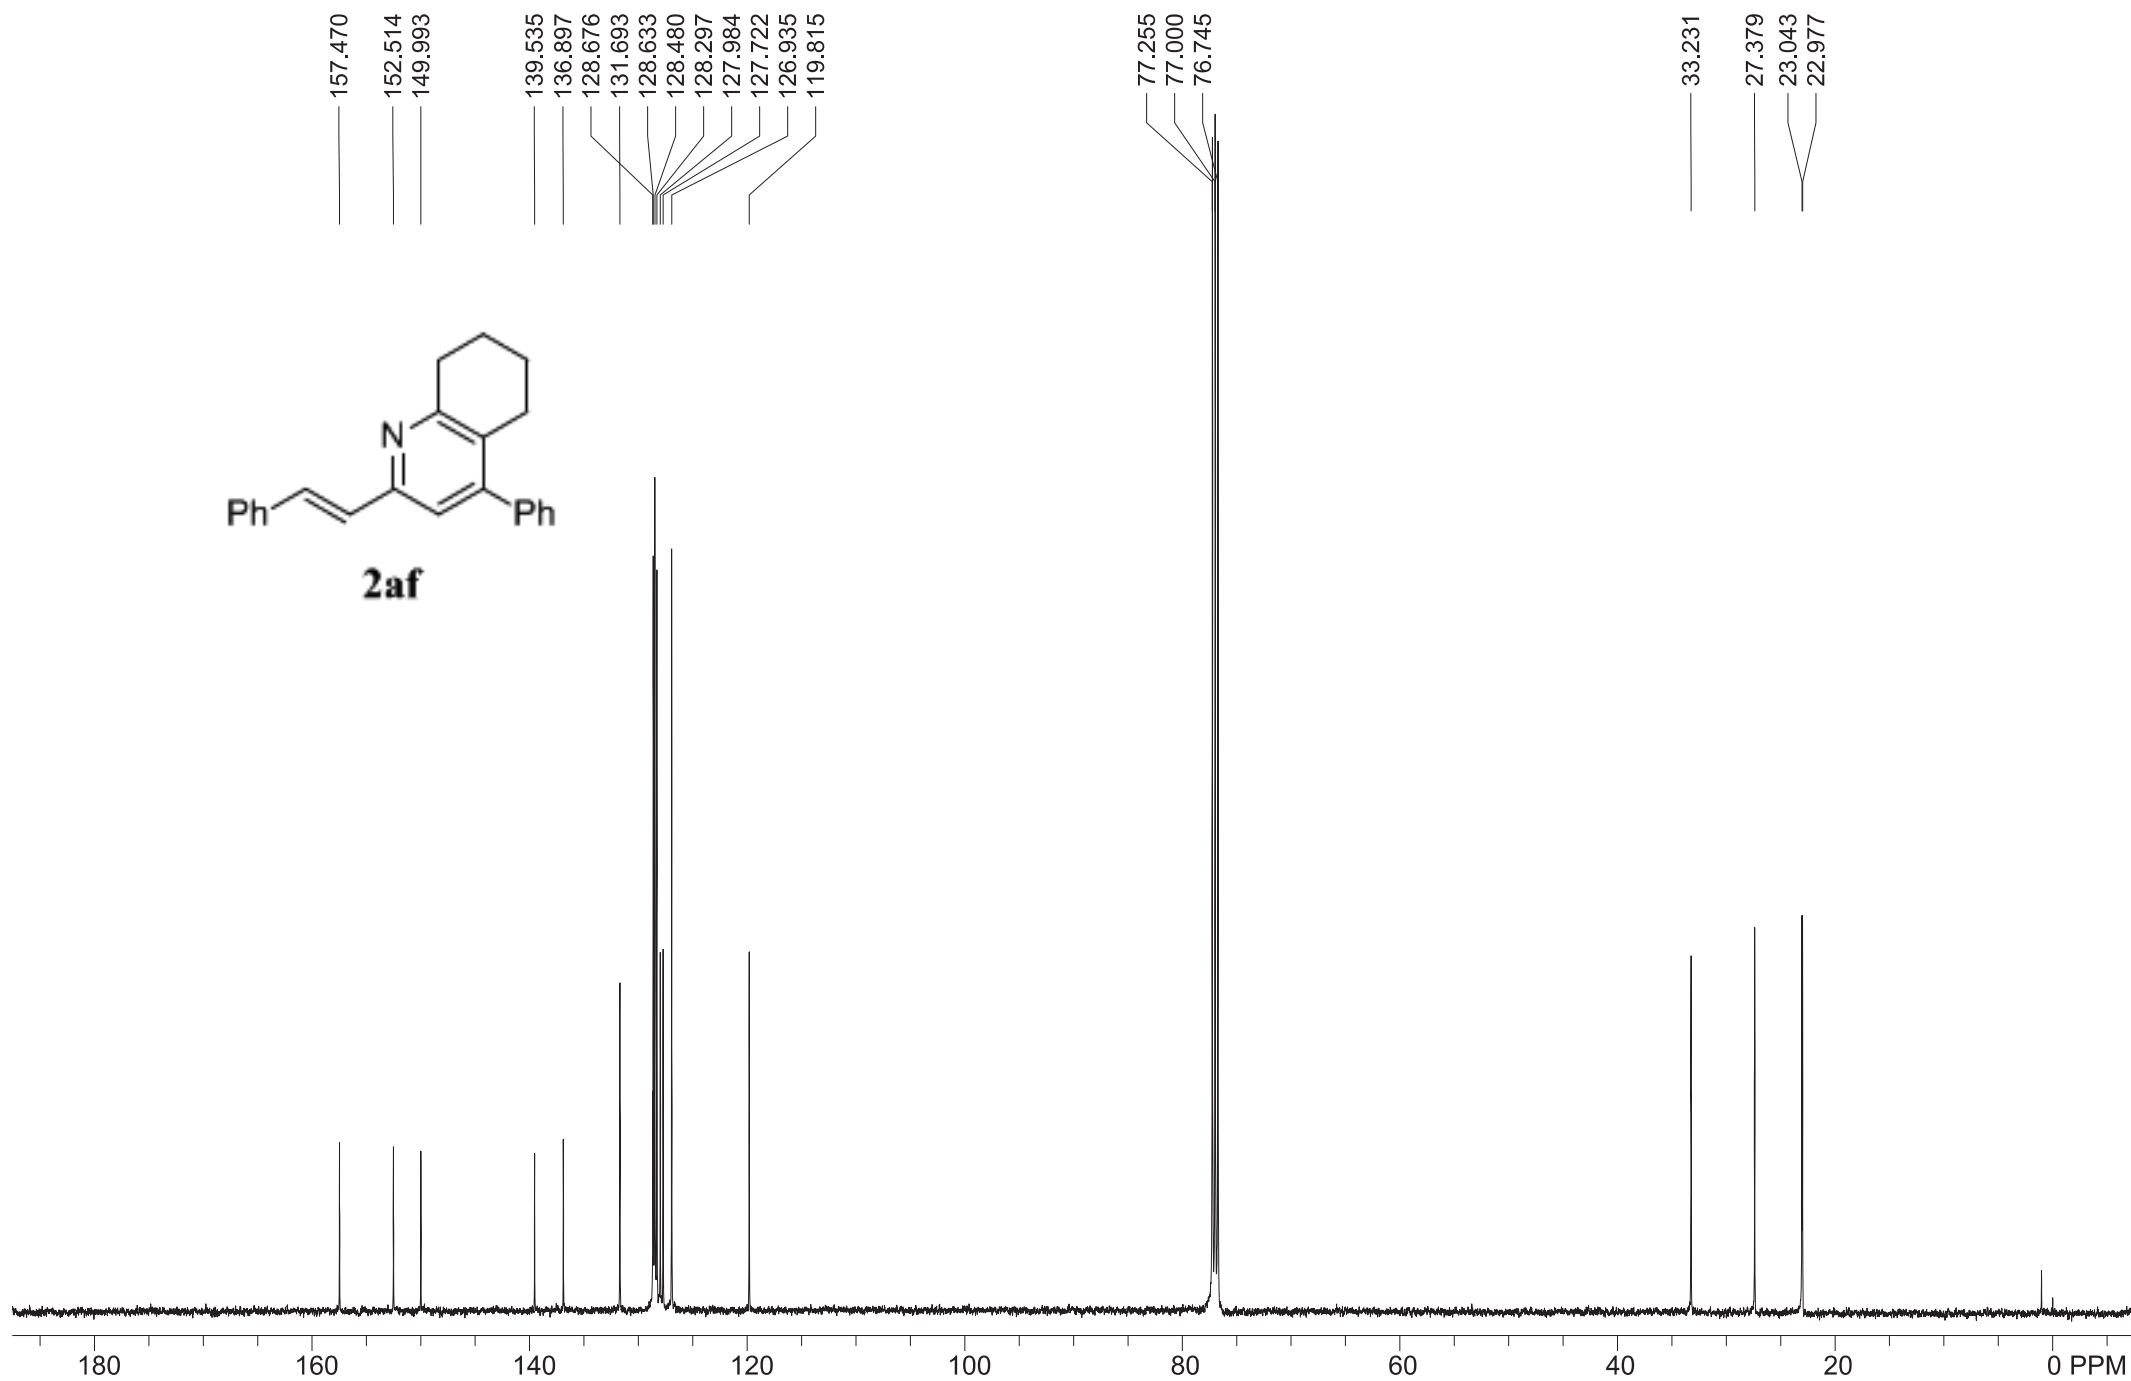

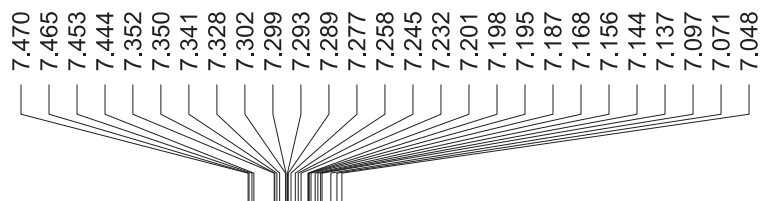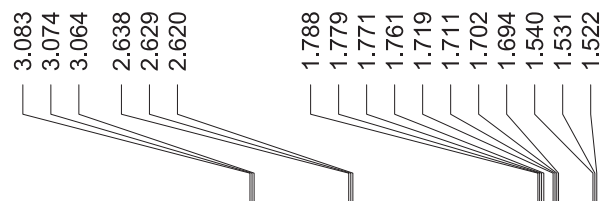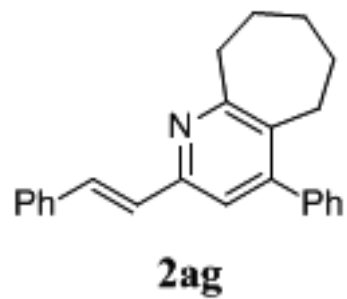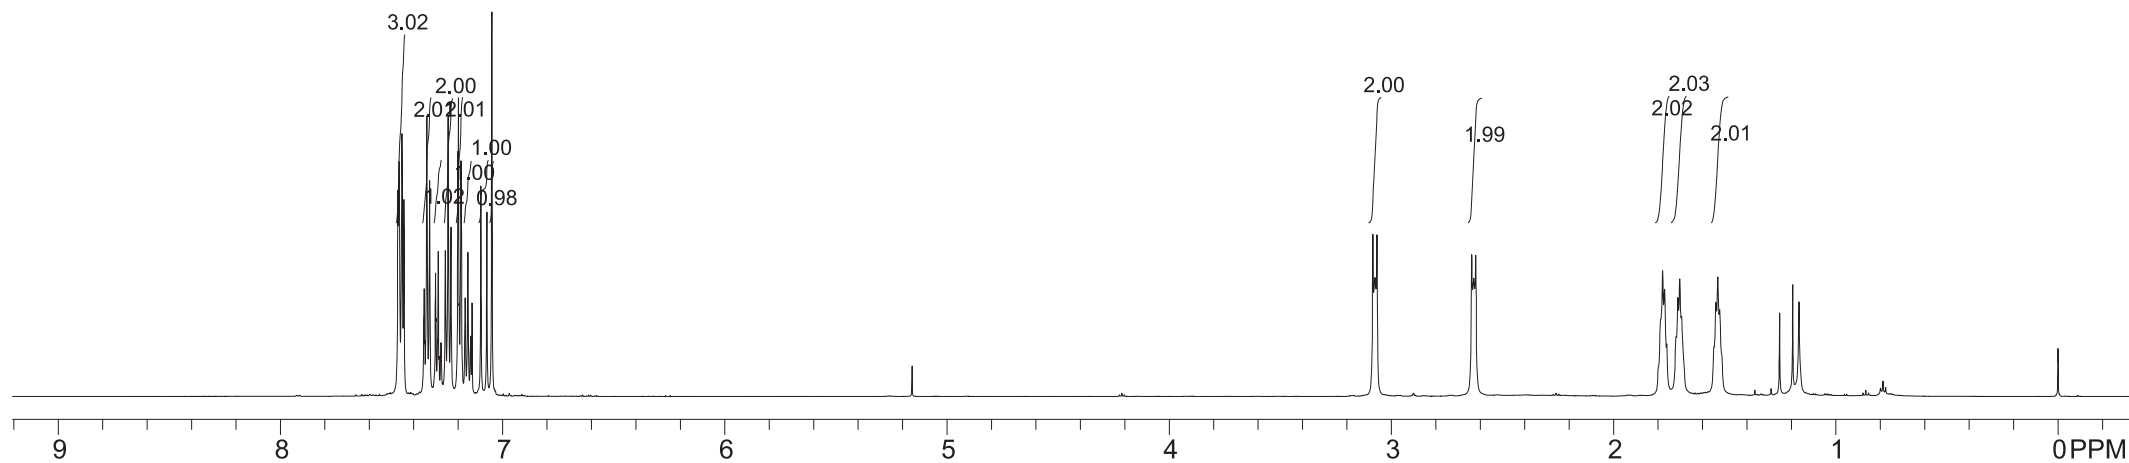

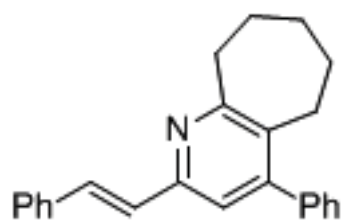

**2ag**

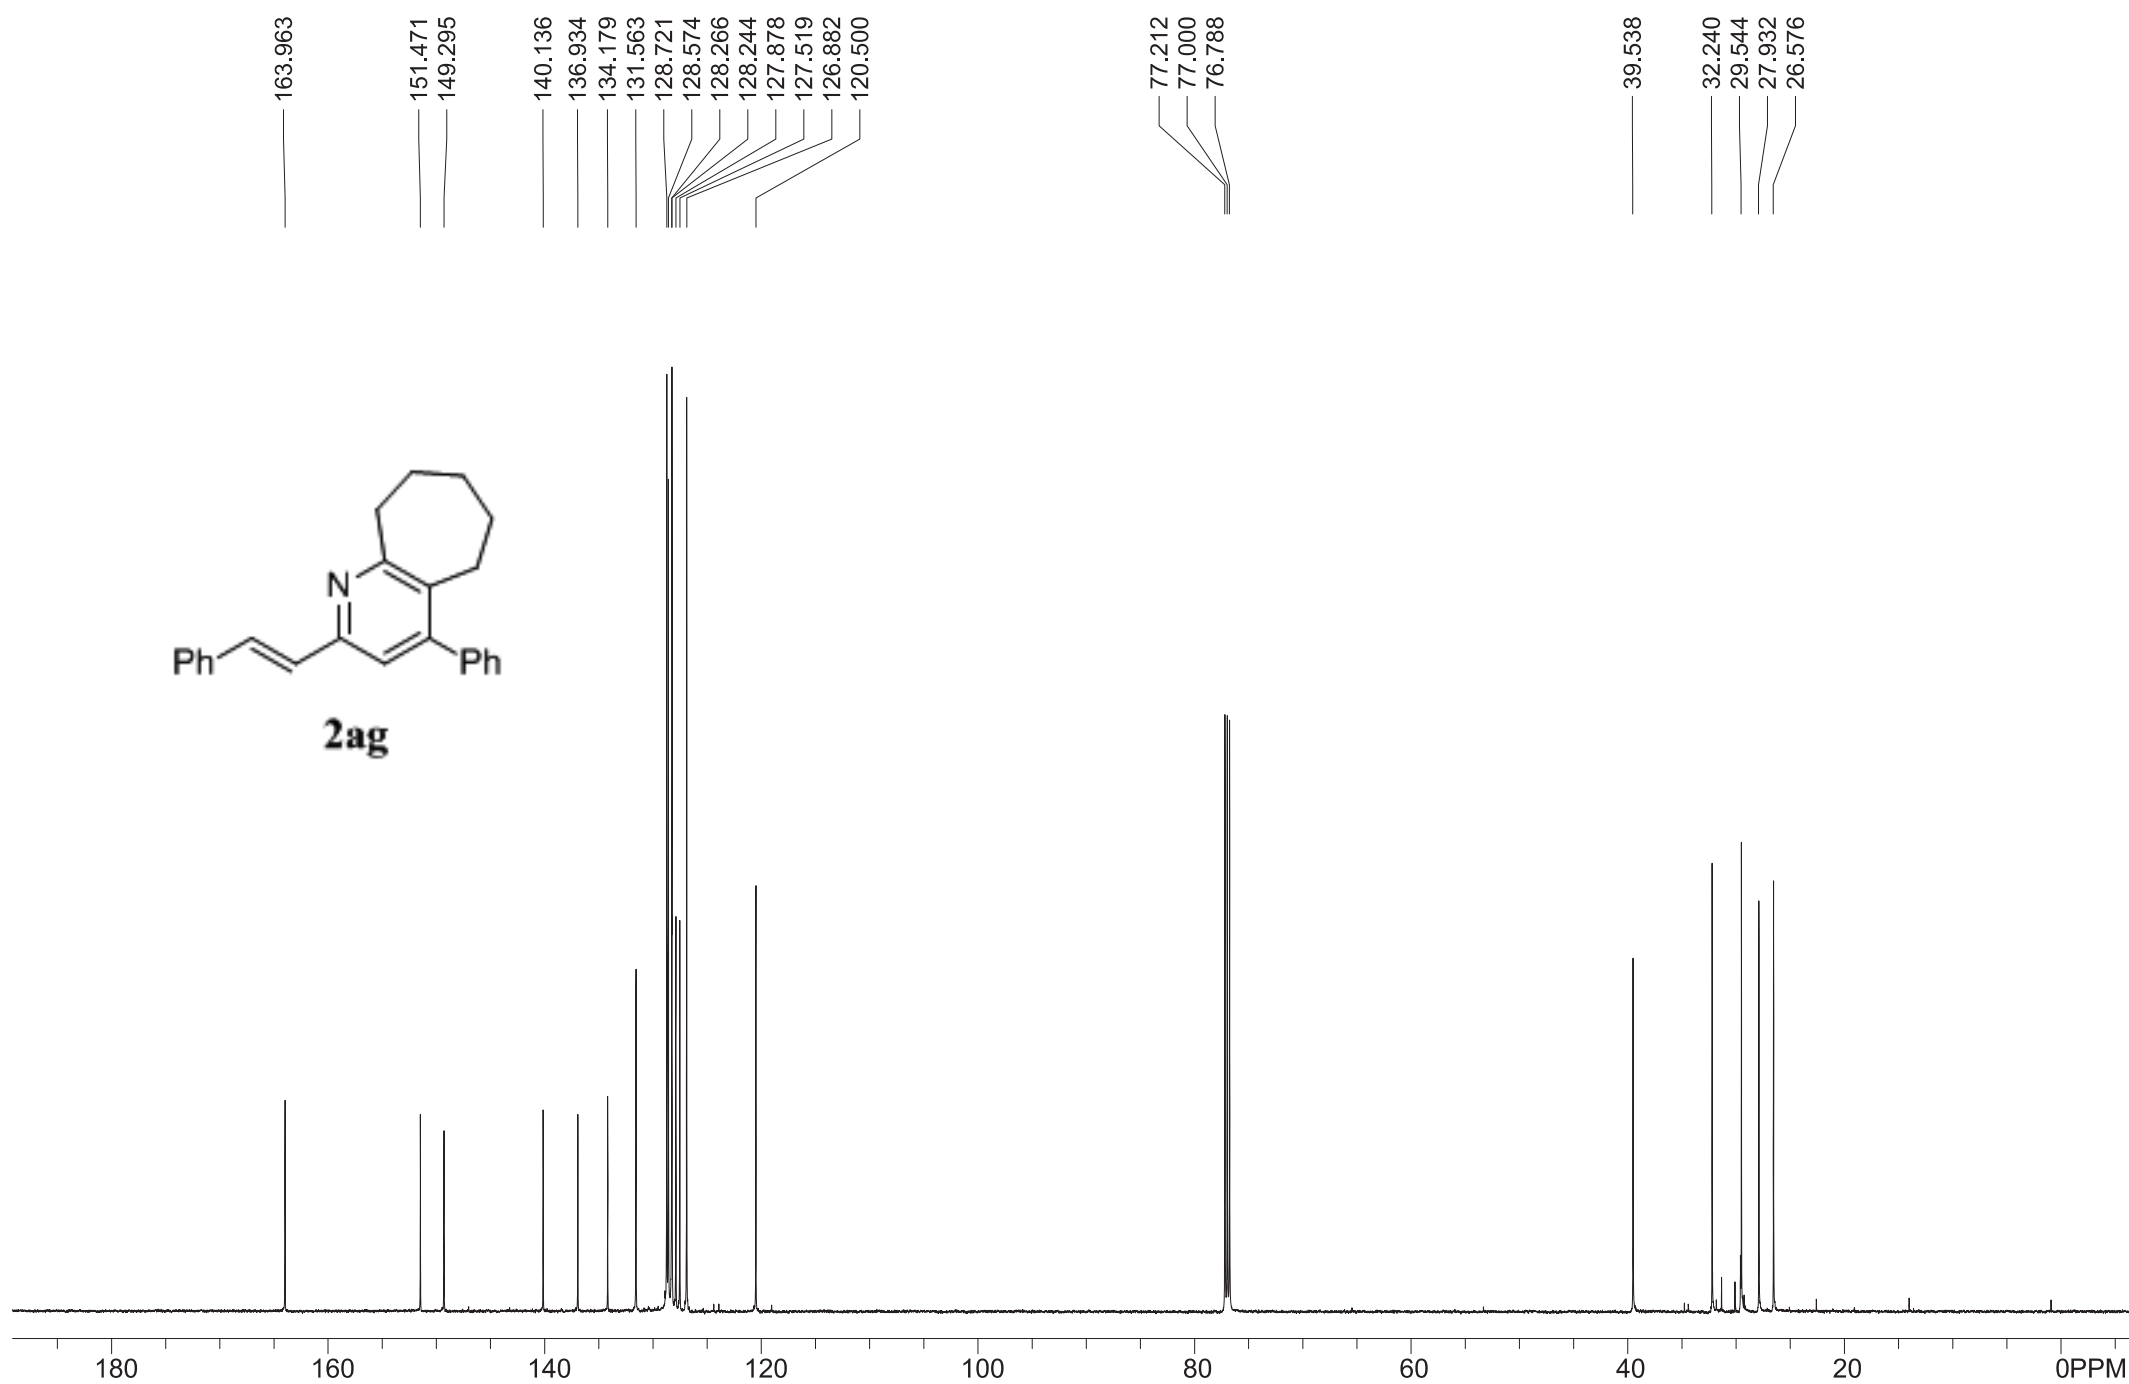

7.510  
7.499  
7.480  
7.472  
7.396  
7.381  
7.363  
7.341  
7.302  
7.284  
7.265  
7.224  
7.207  
7.174  
7.149  
7.124  
7.108

4.593

4.038  
4.024  
4.010

3.070  
3.056  
3.042

-0.000

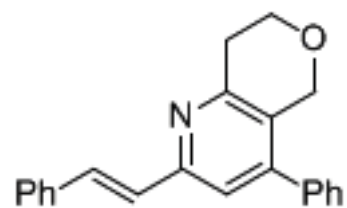

**2ah**

3.03 3.10  
3.01  
2.13 2.02

1.95

2.03

2.00

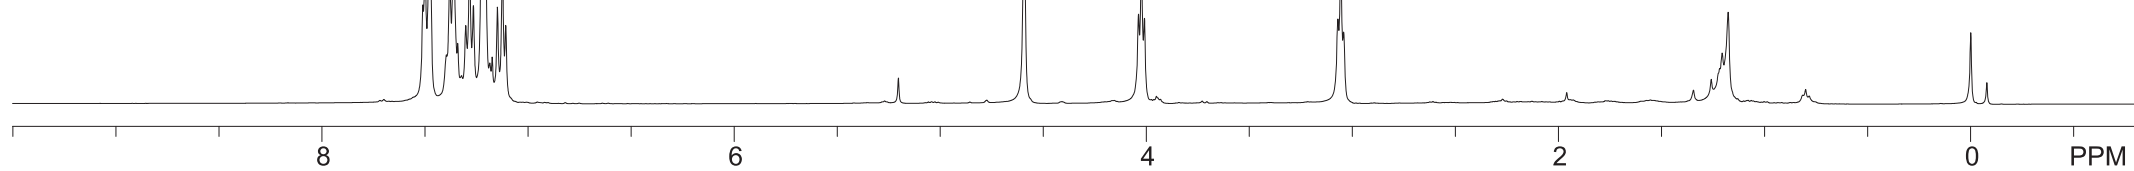

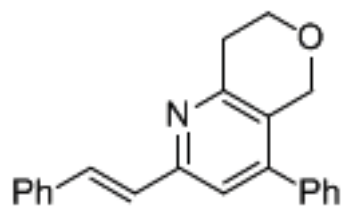

**2ah**

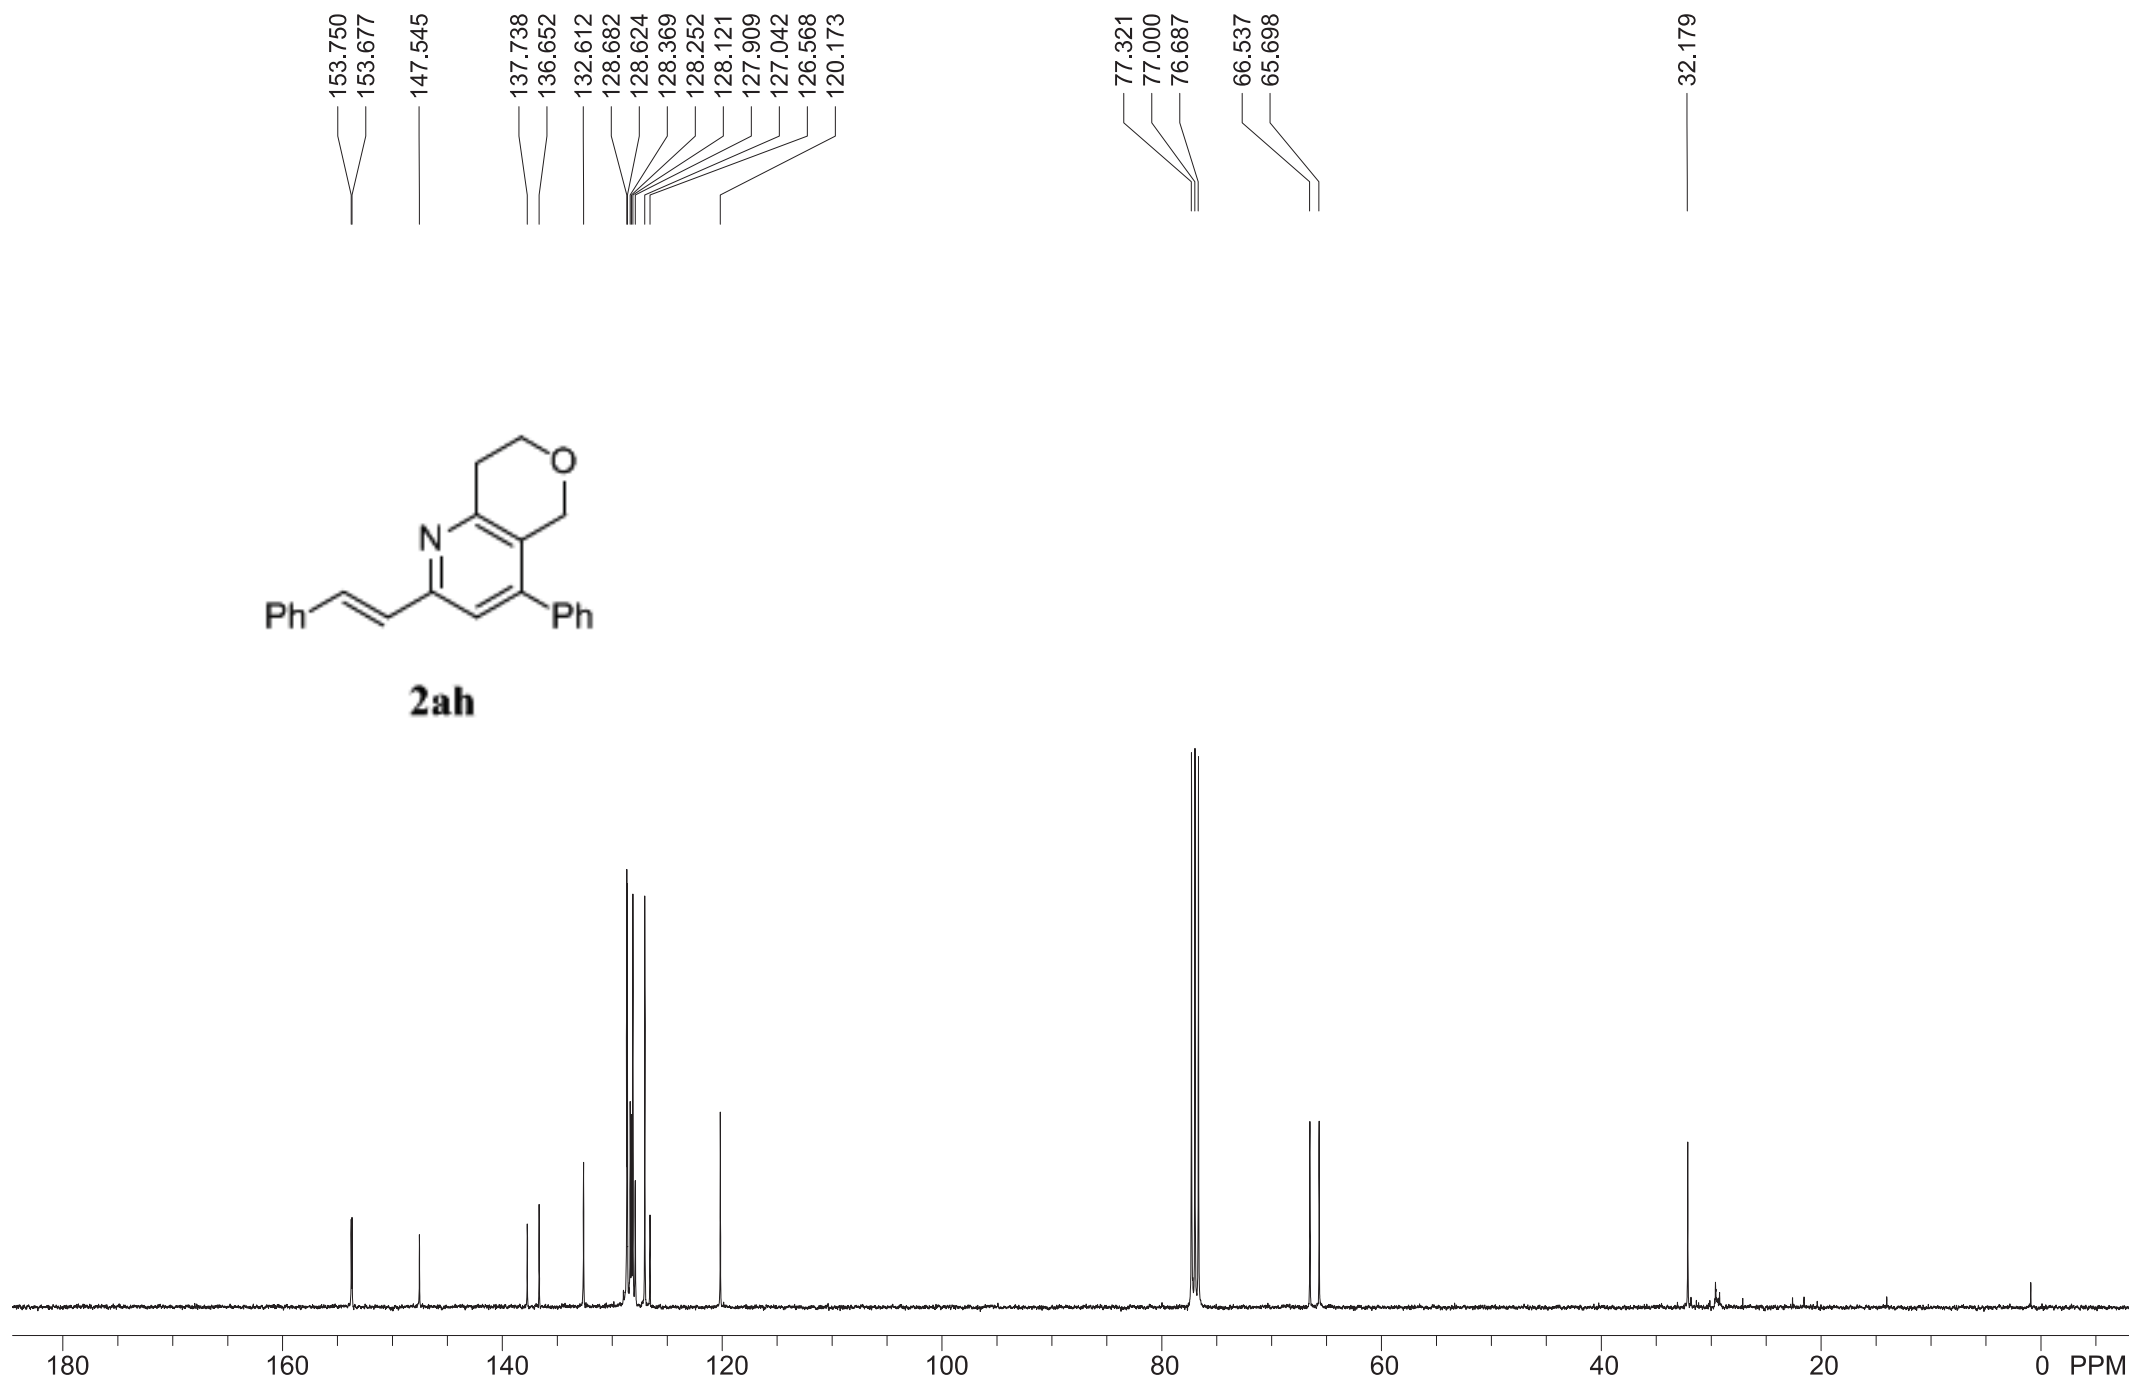

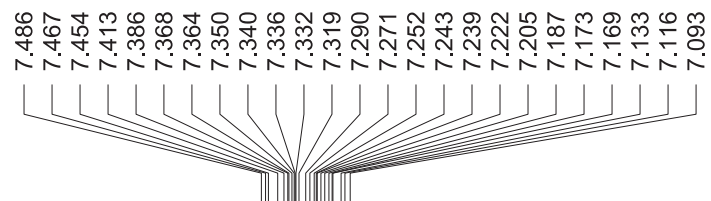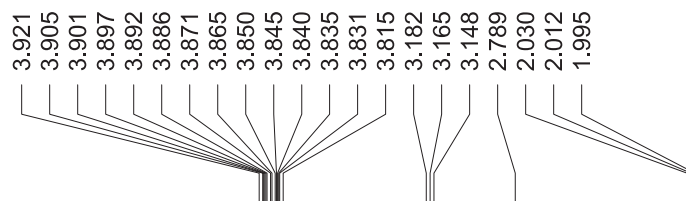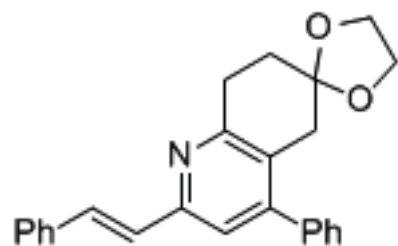

**2ai**

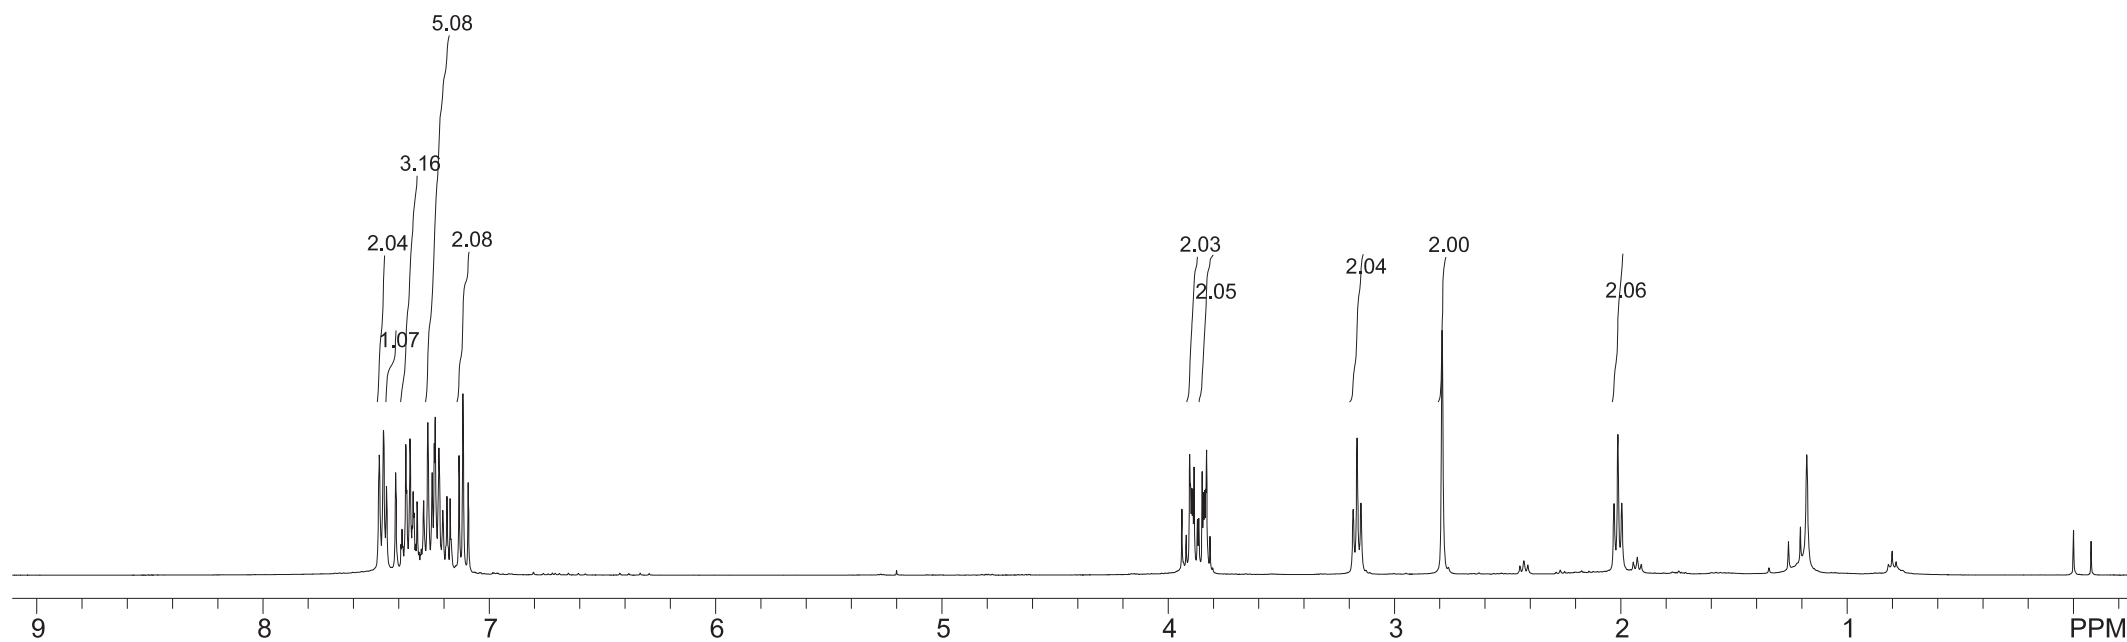

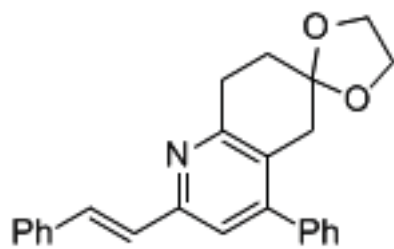

**2ai**

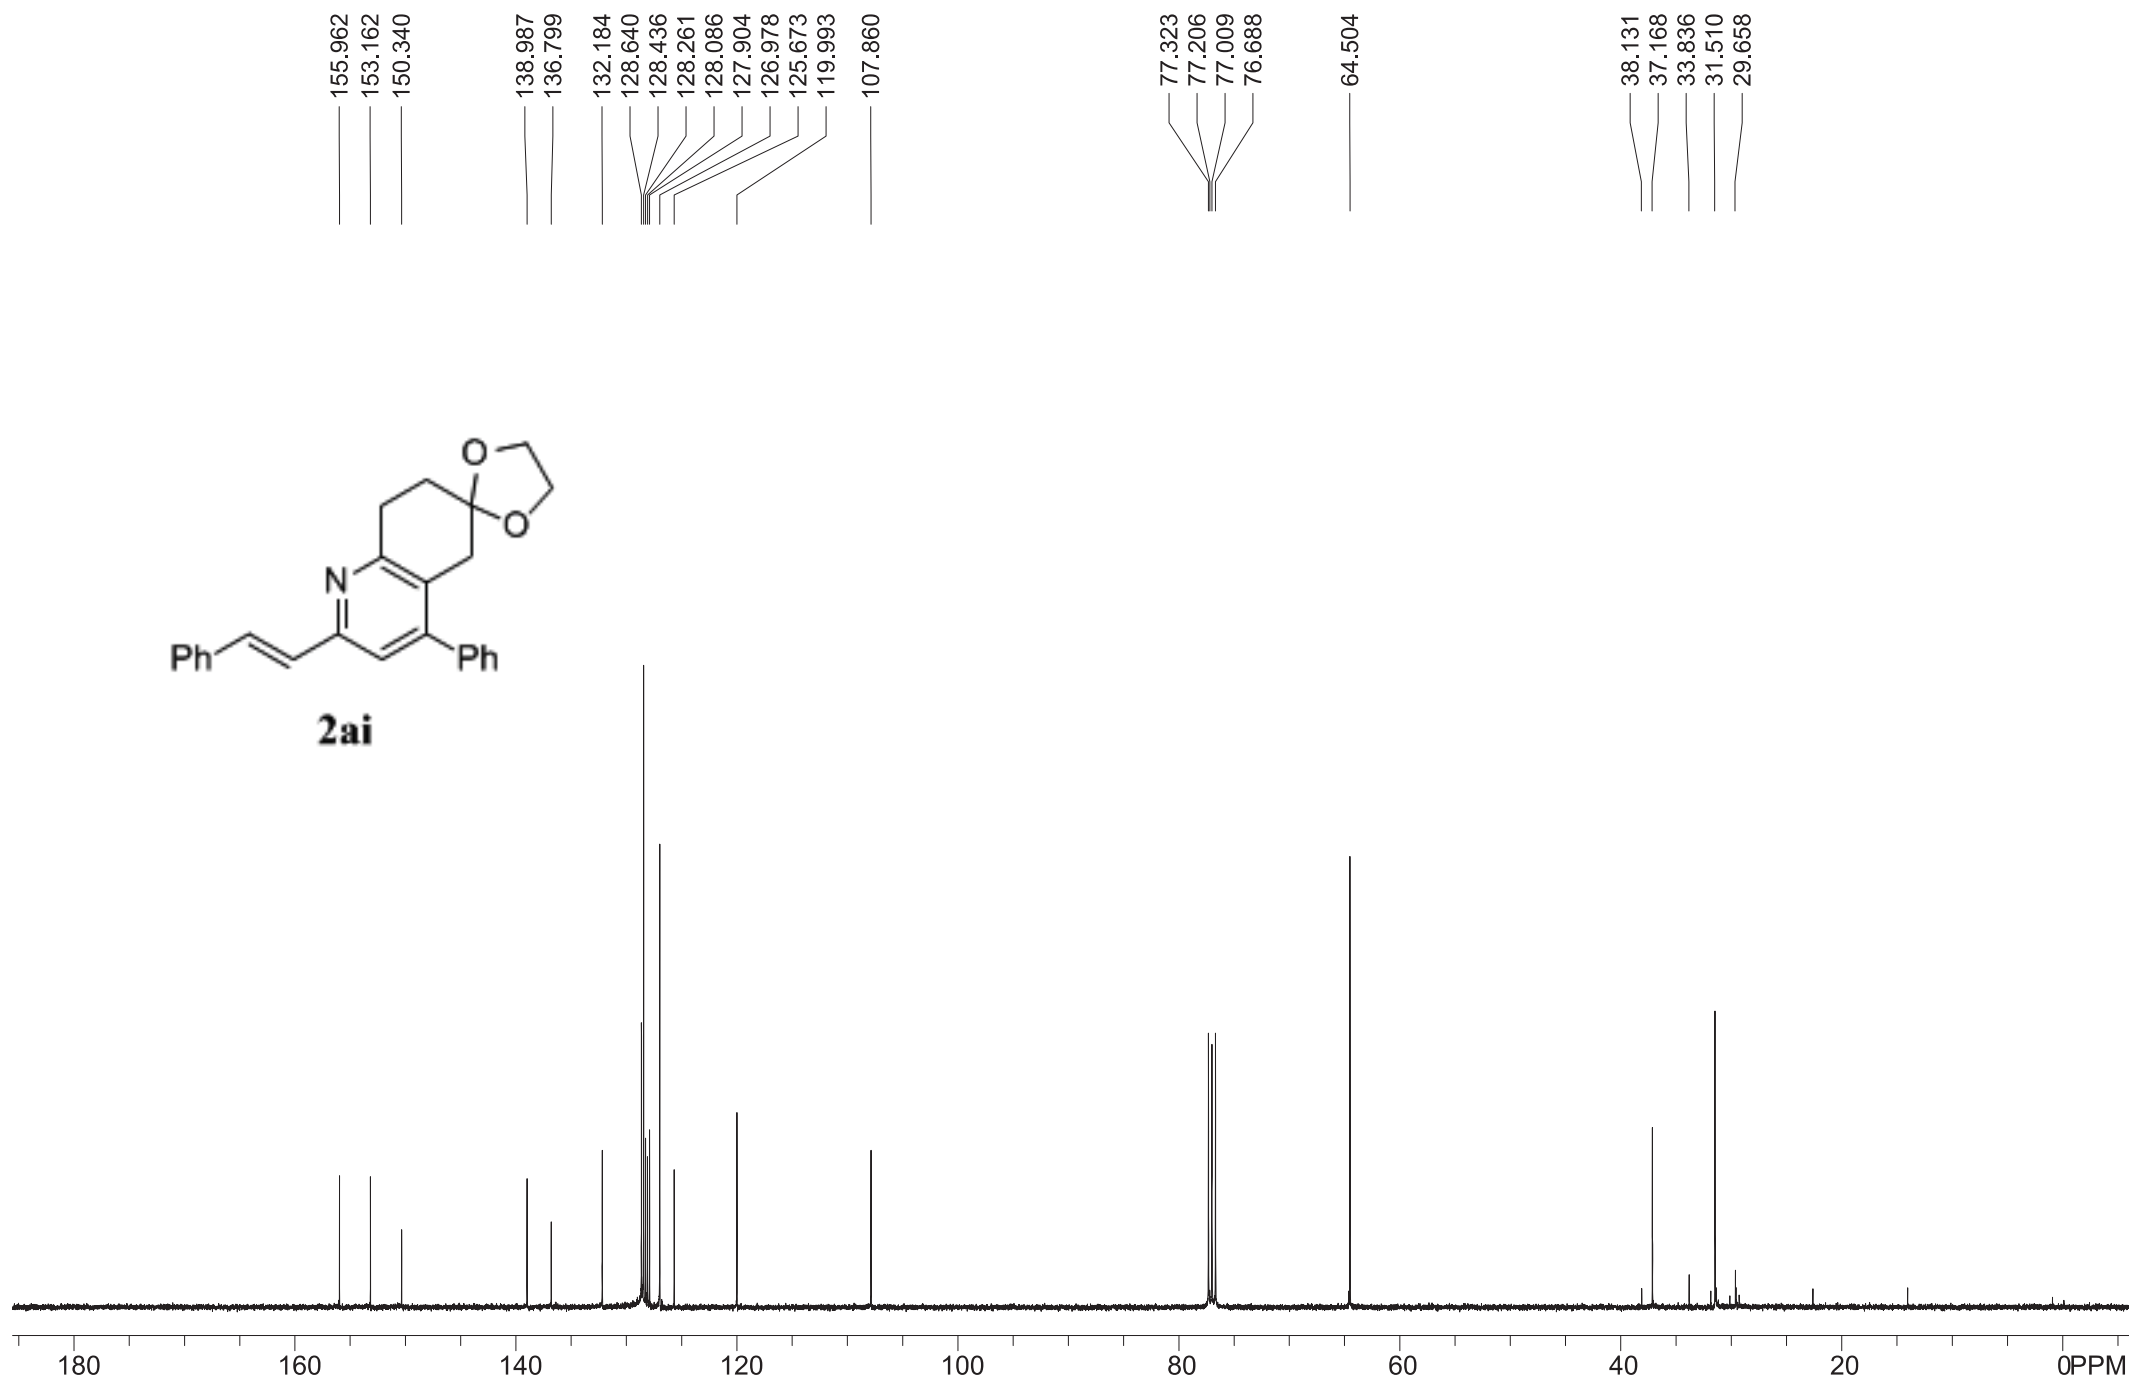

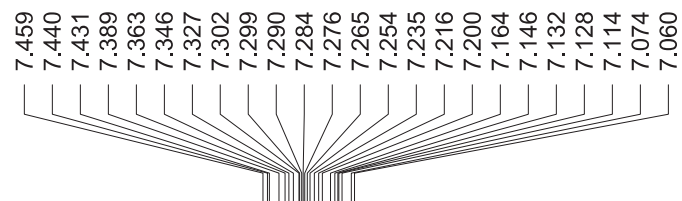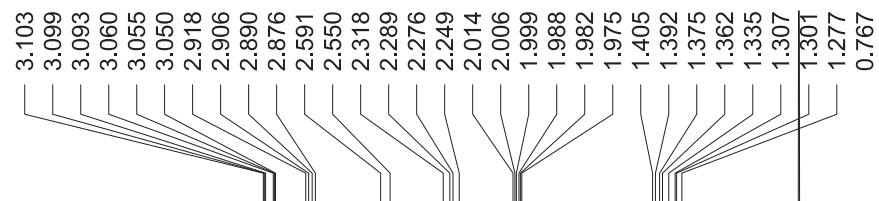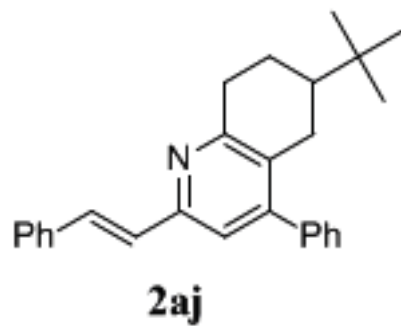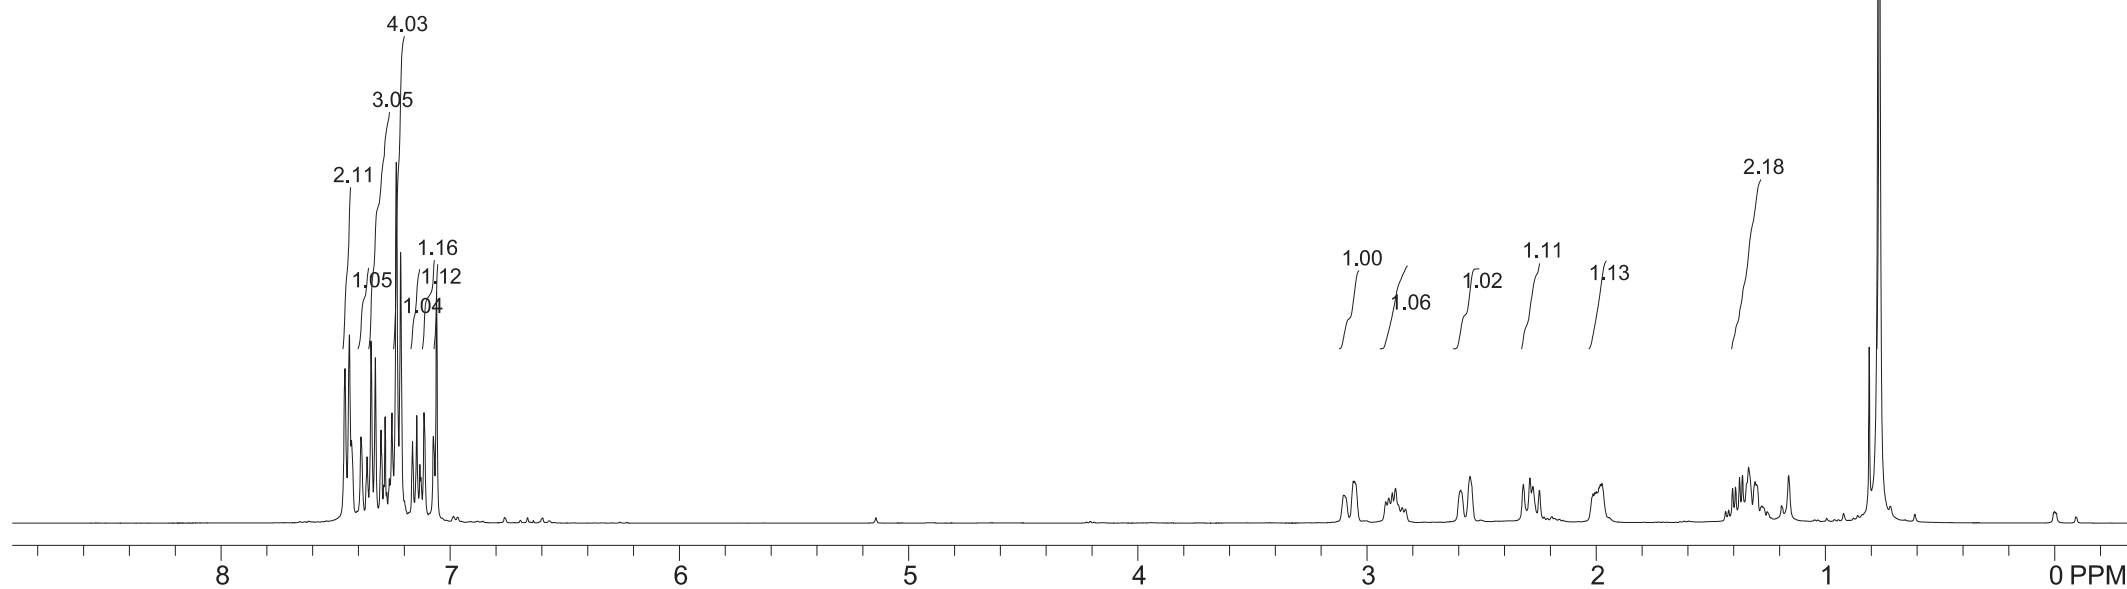



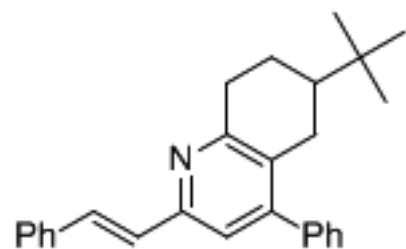

**2aj**

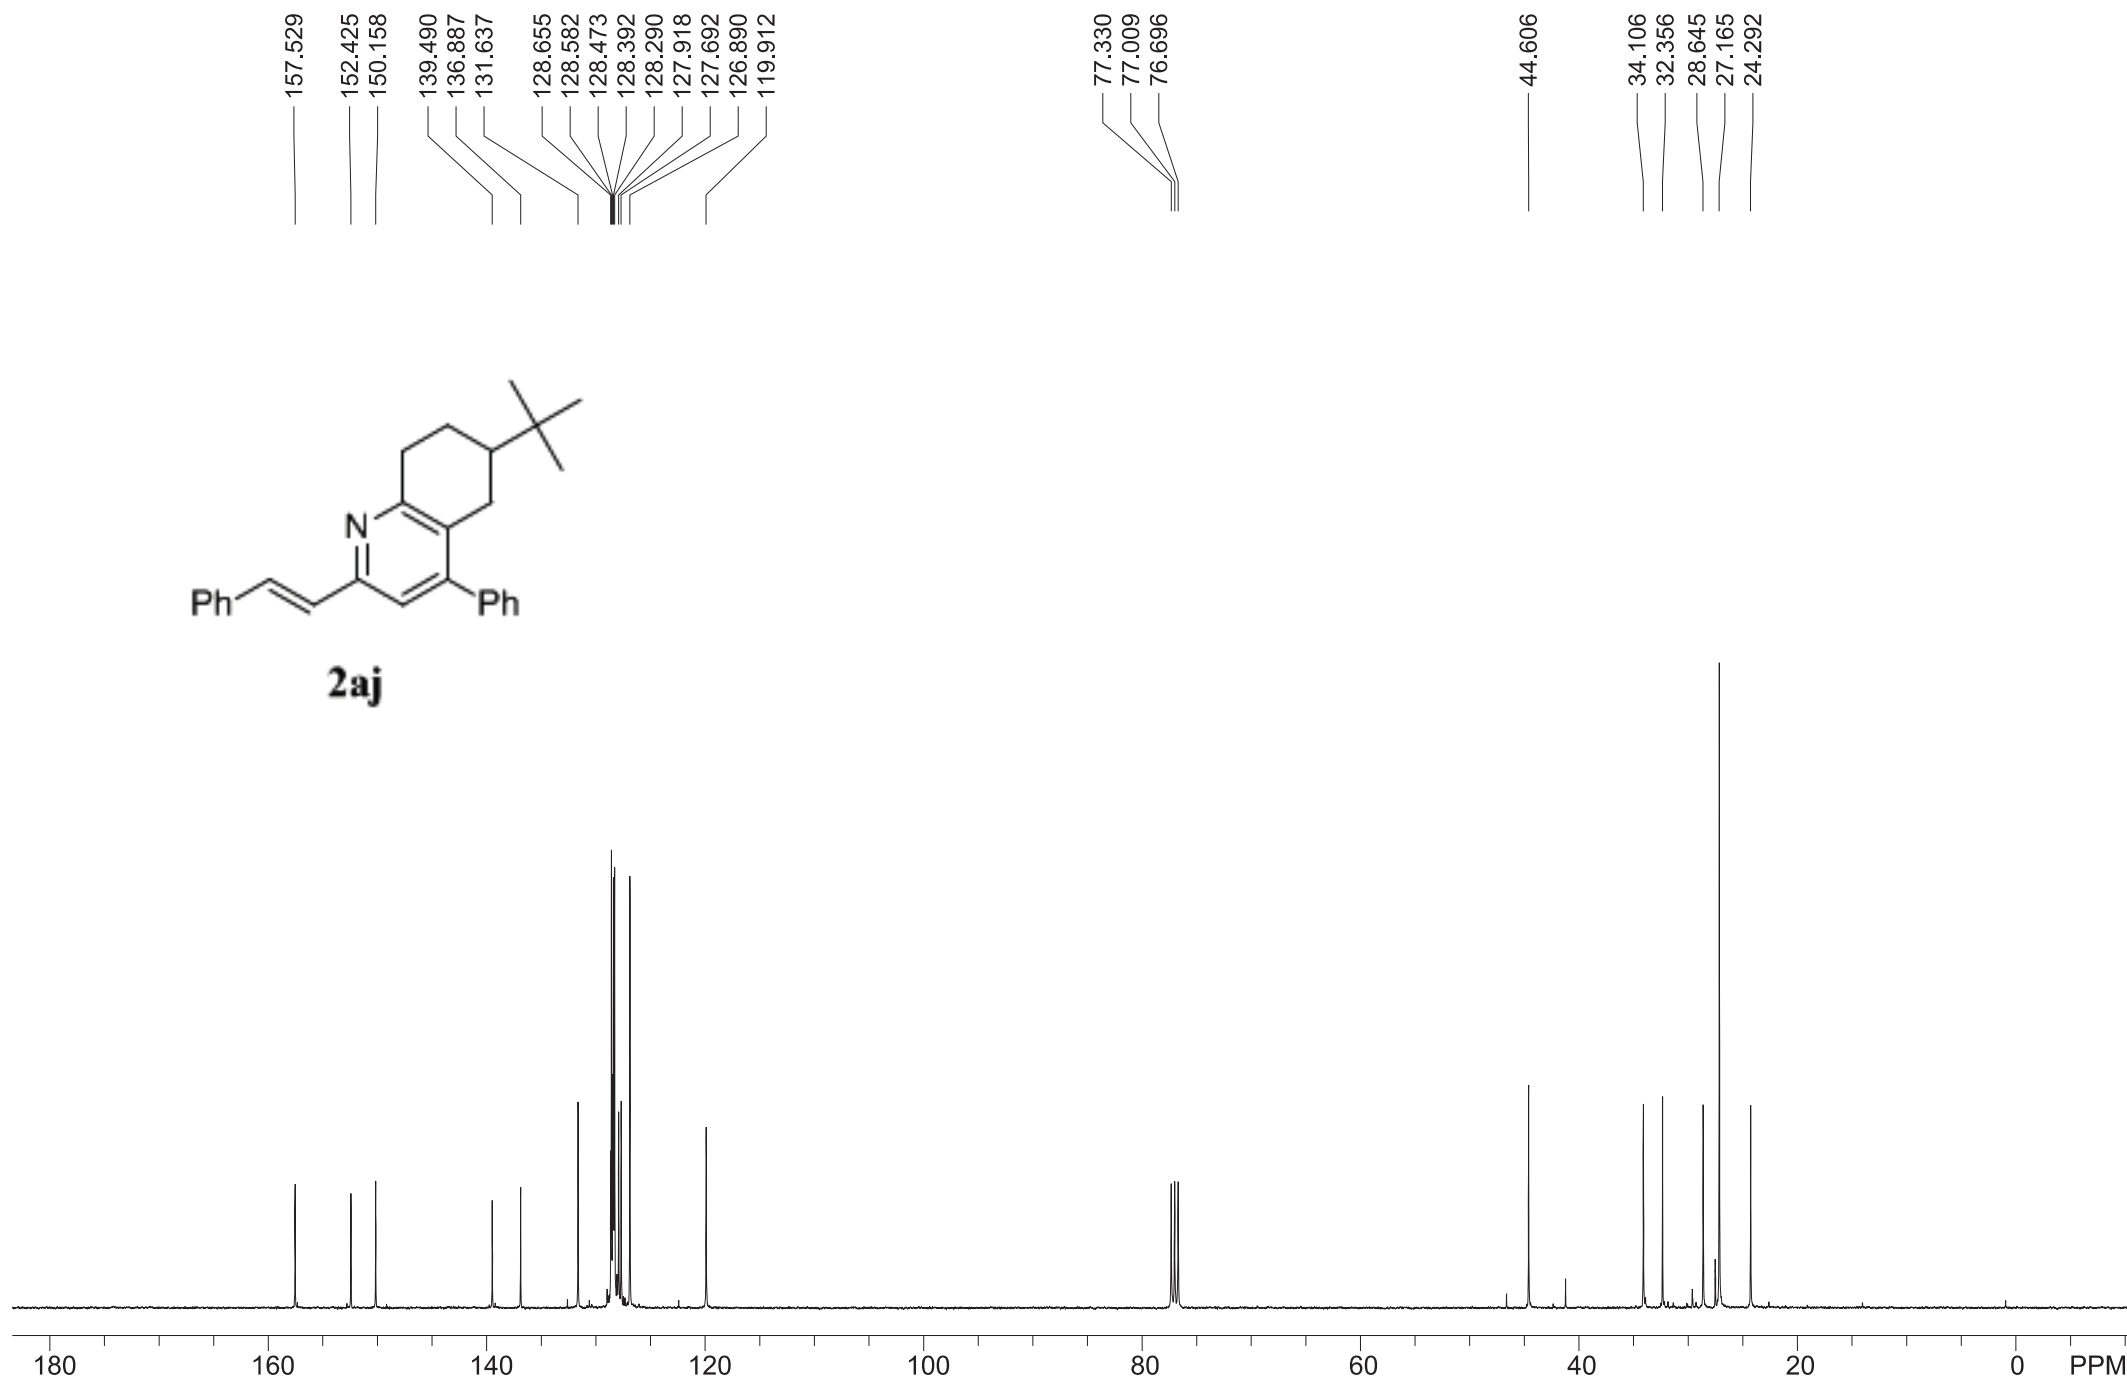

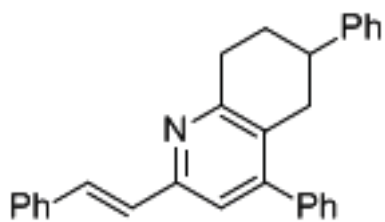

**2ak**

7.506  
7.486  
7.443  
7.349  
7.332  
7.313  
7.288  
7.276  
7.269  
7.243  
7.220  
7.201  
7.185  
7.173  
7.155  
7.127

3.213  
3.206  
3.169  
3.162  
3.141  
3.126  
3.113  
3.097  
3.069  
2.879  
2.858  
2.830  
2.789  
2.748  
2.721  
2.707  
2.679  
2.159  
2.154  
2.090  
2.075  
2.061  
2.047  
2.031  
2.017  
2.002  
0.000

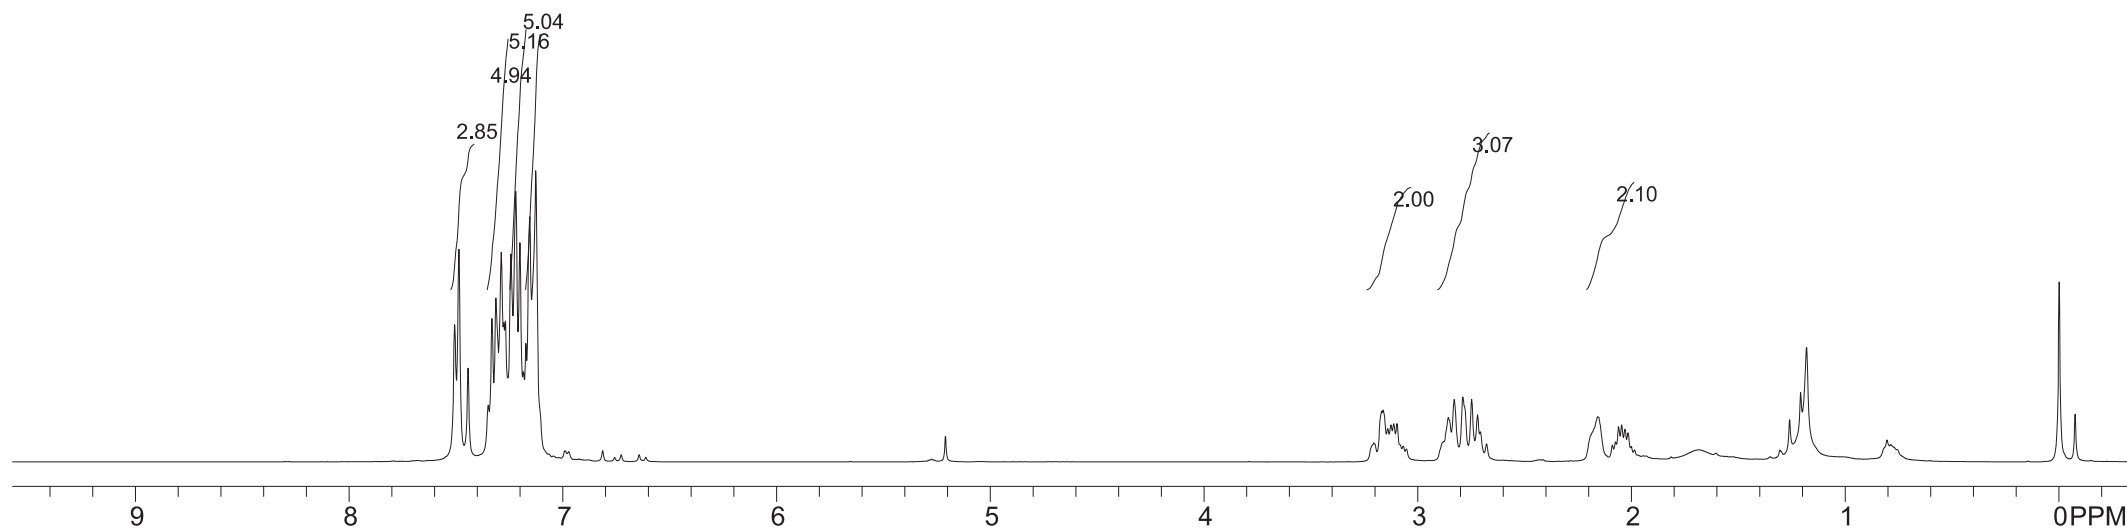

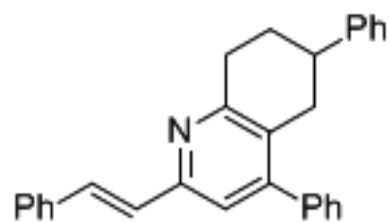

**2ak**

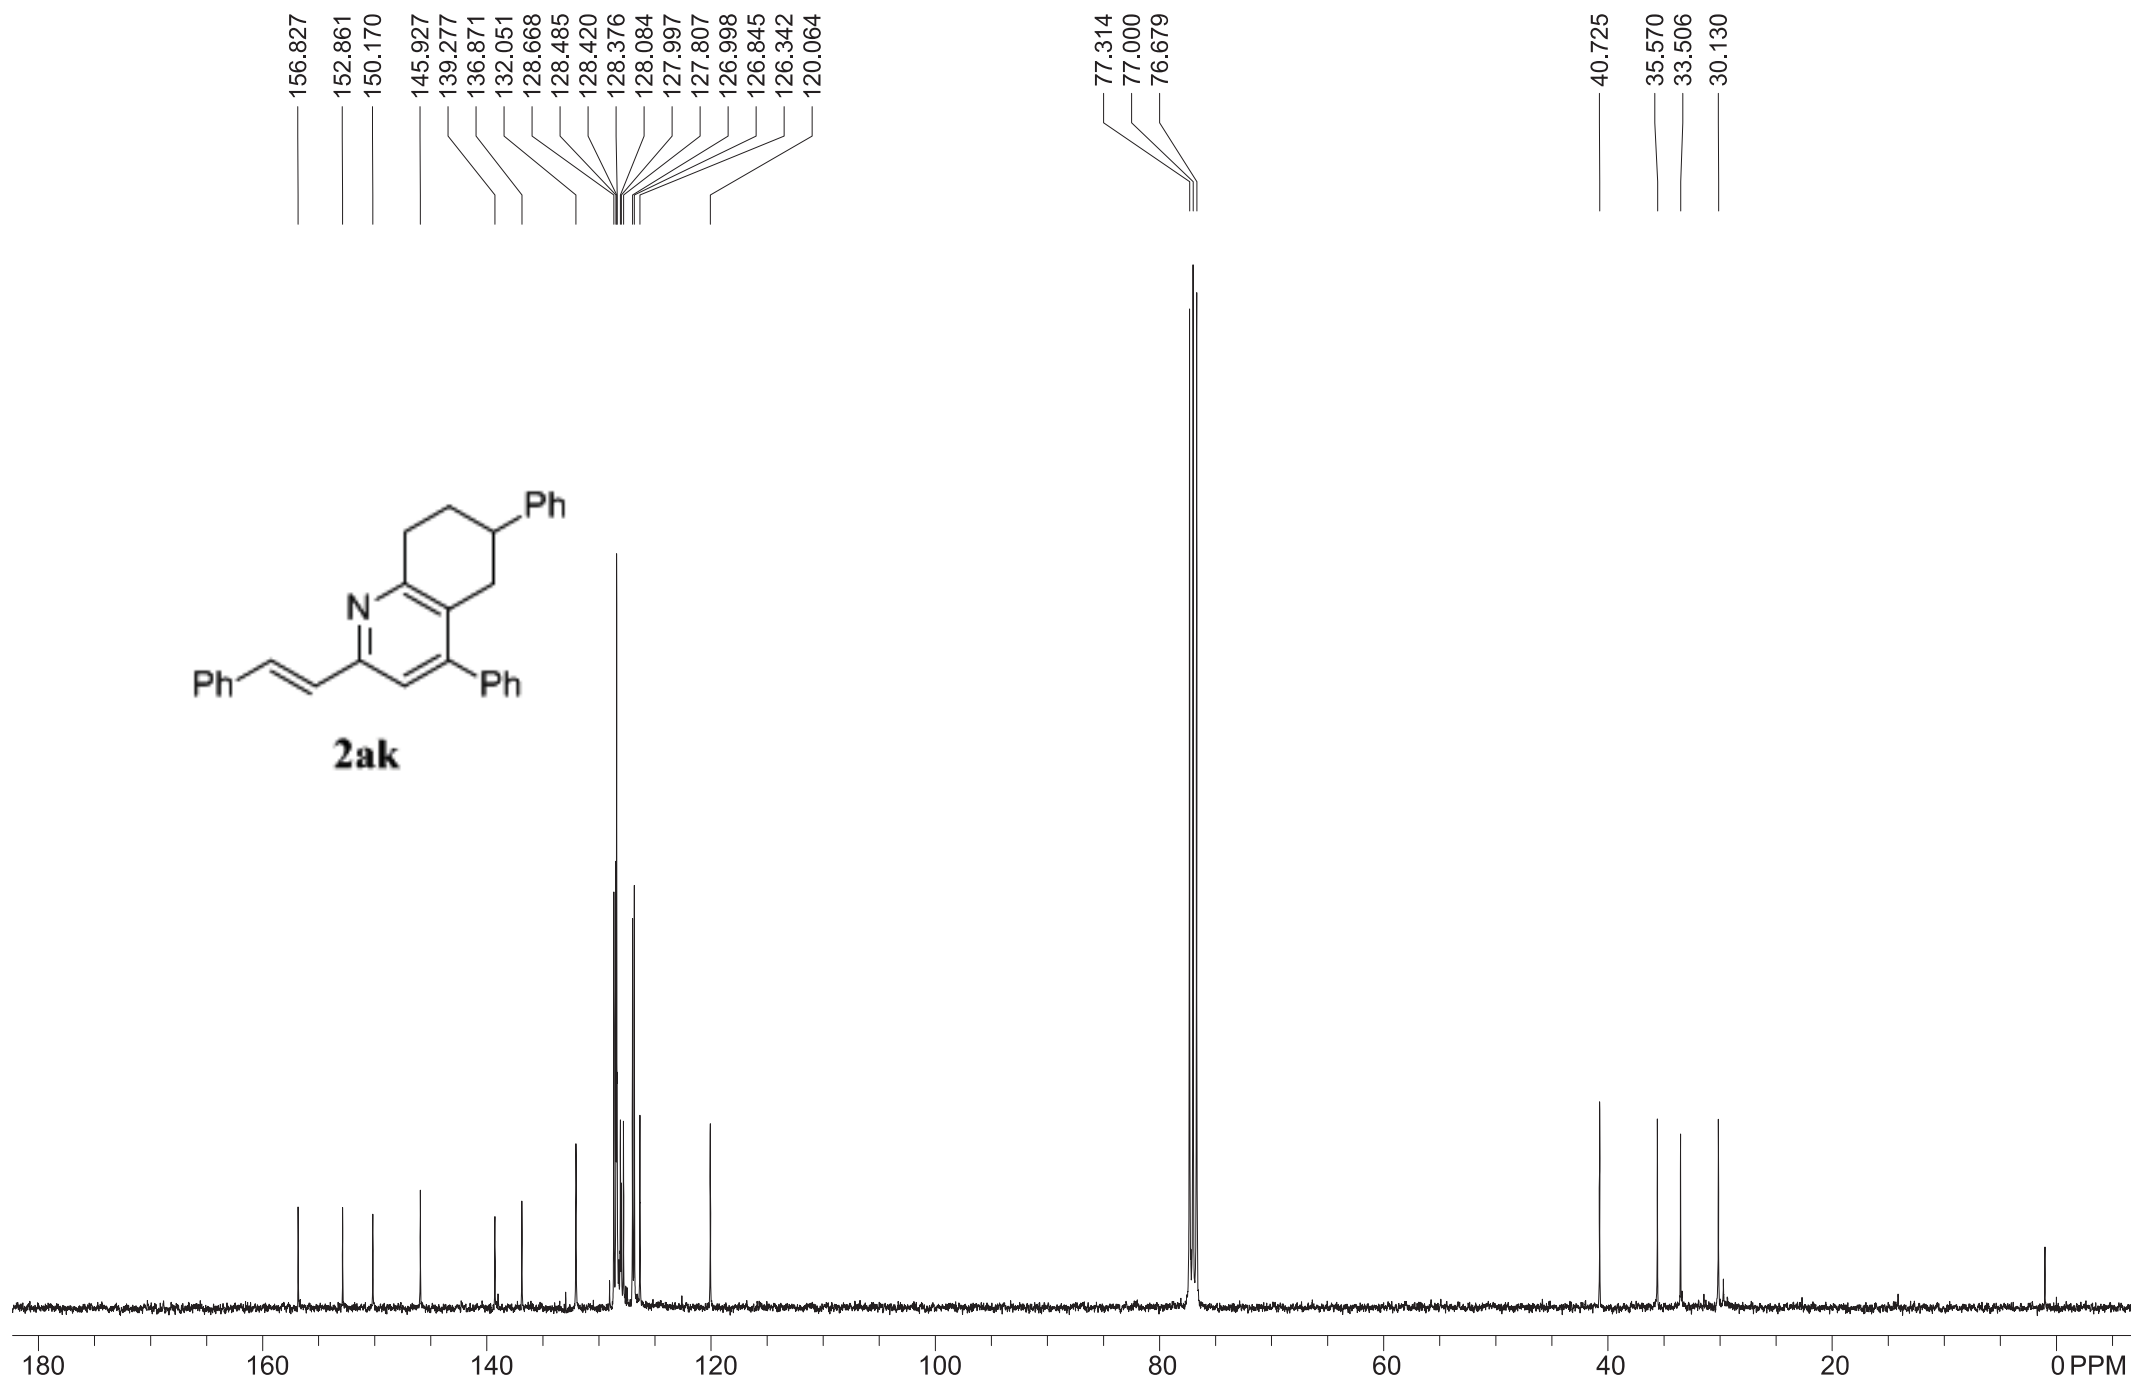

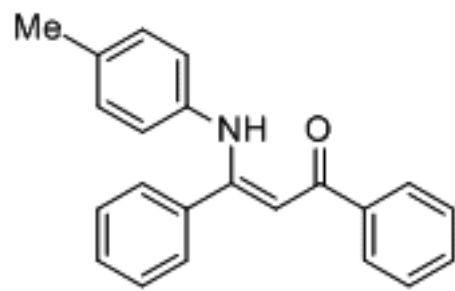

**2am**

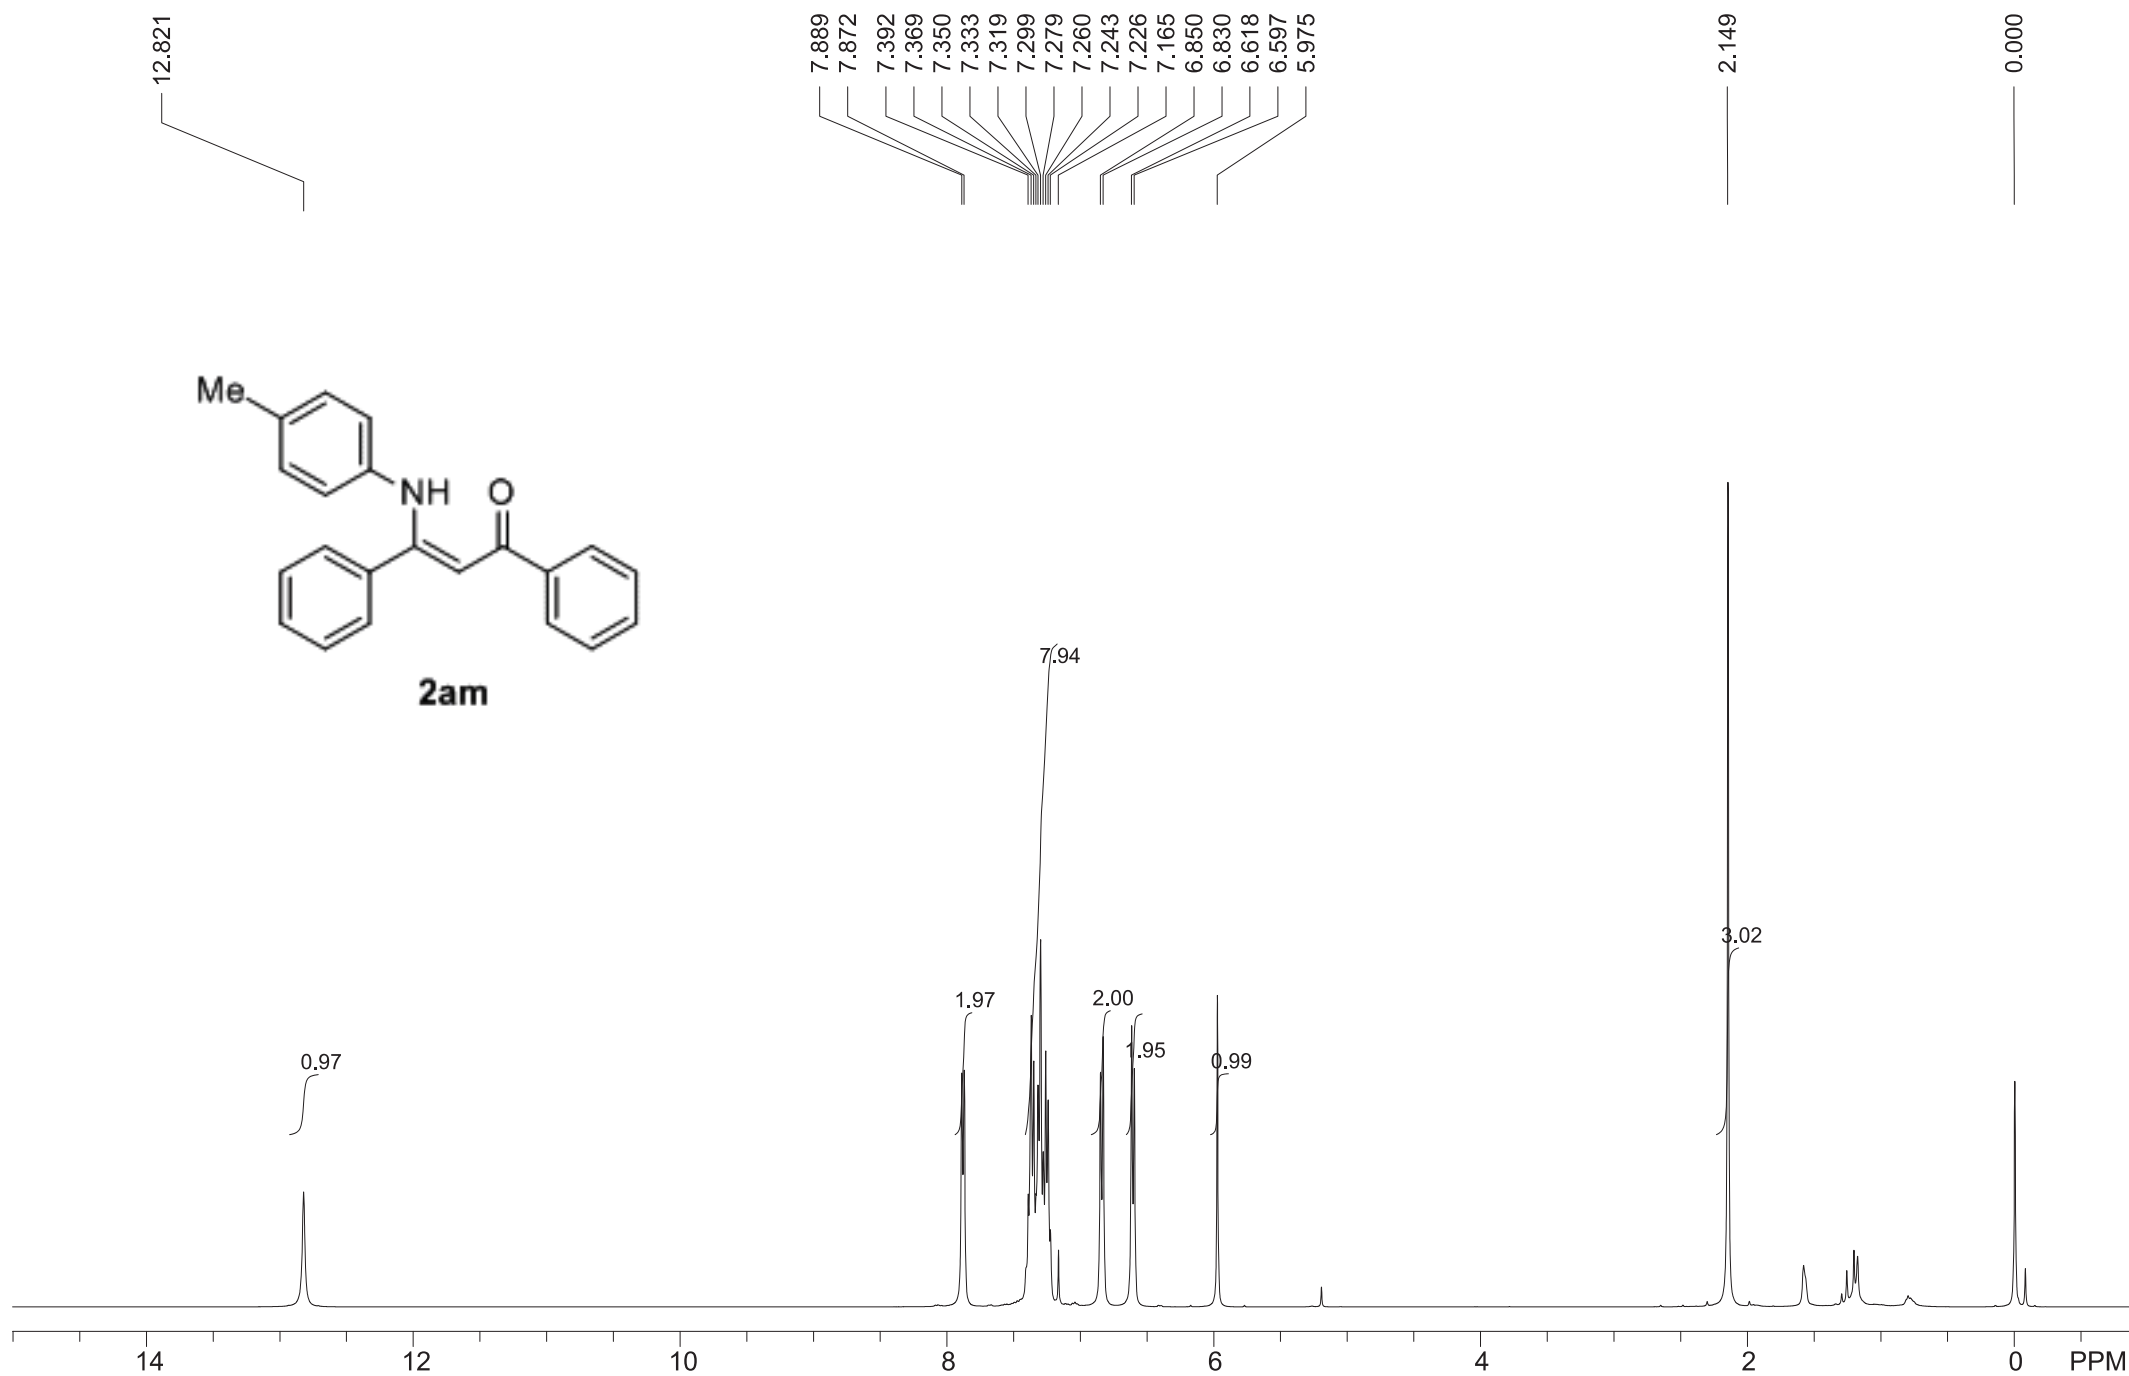



**2am**

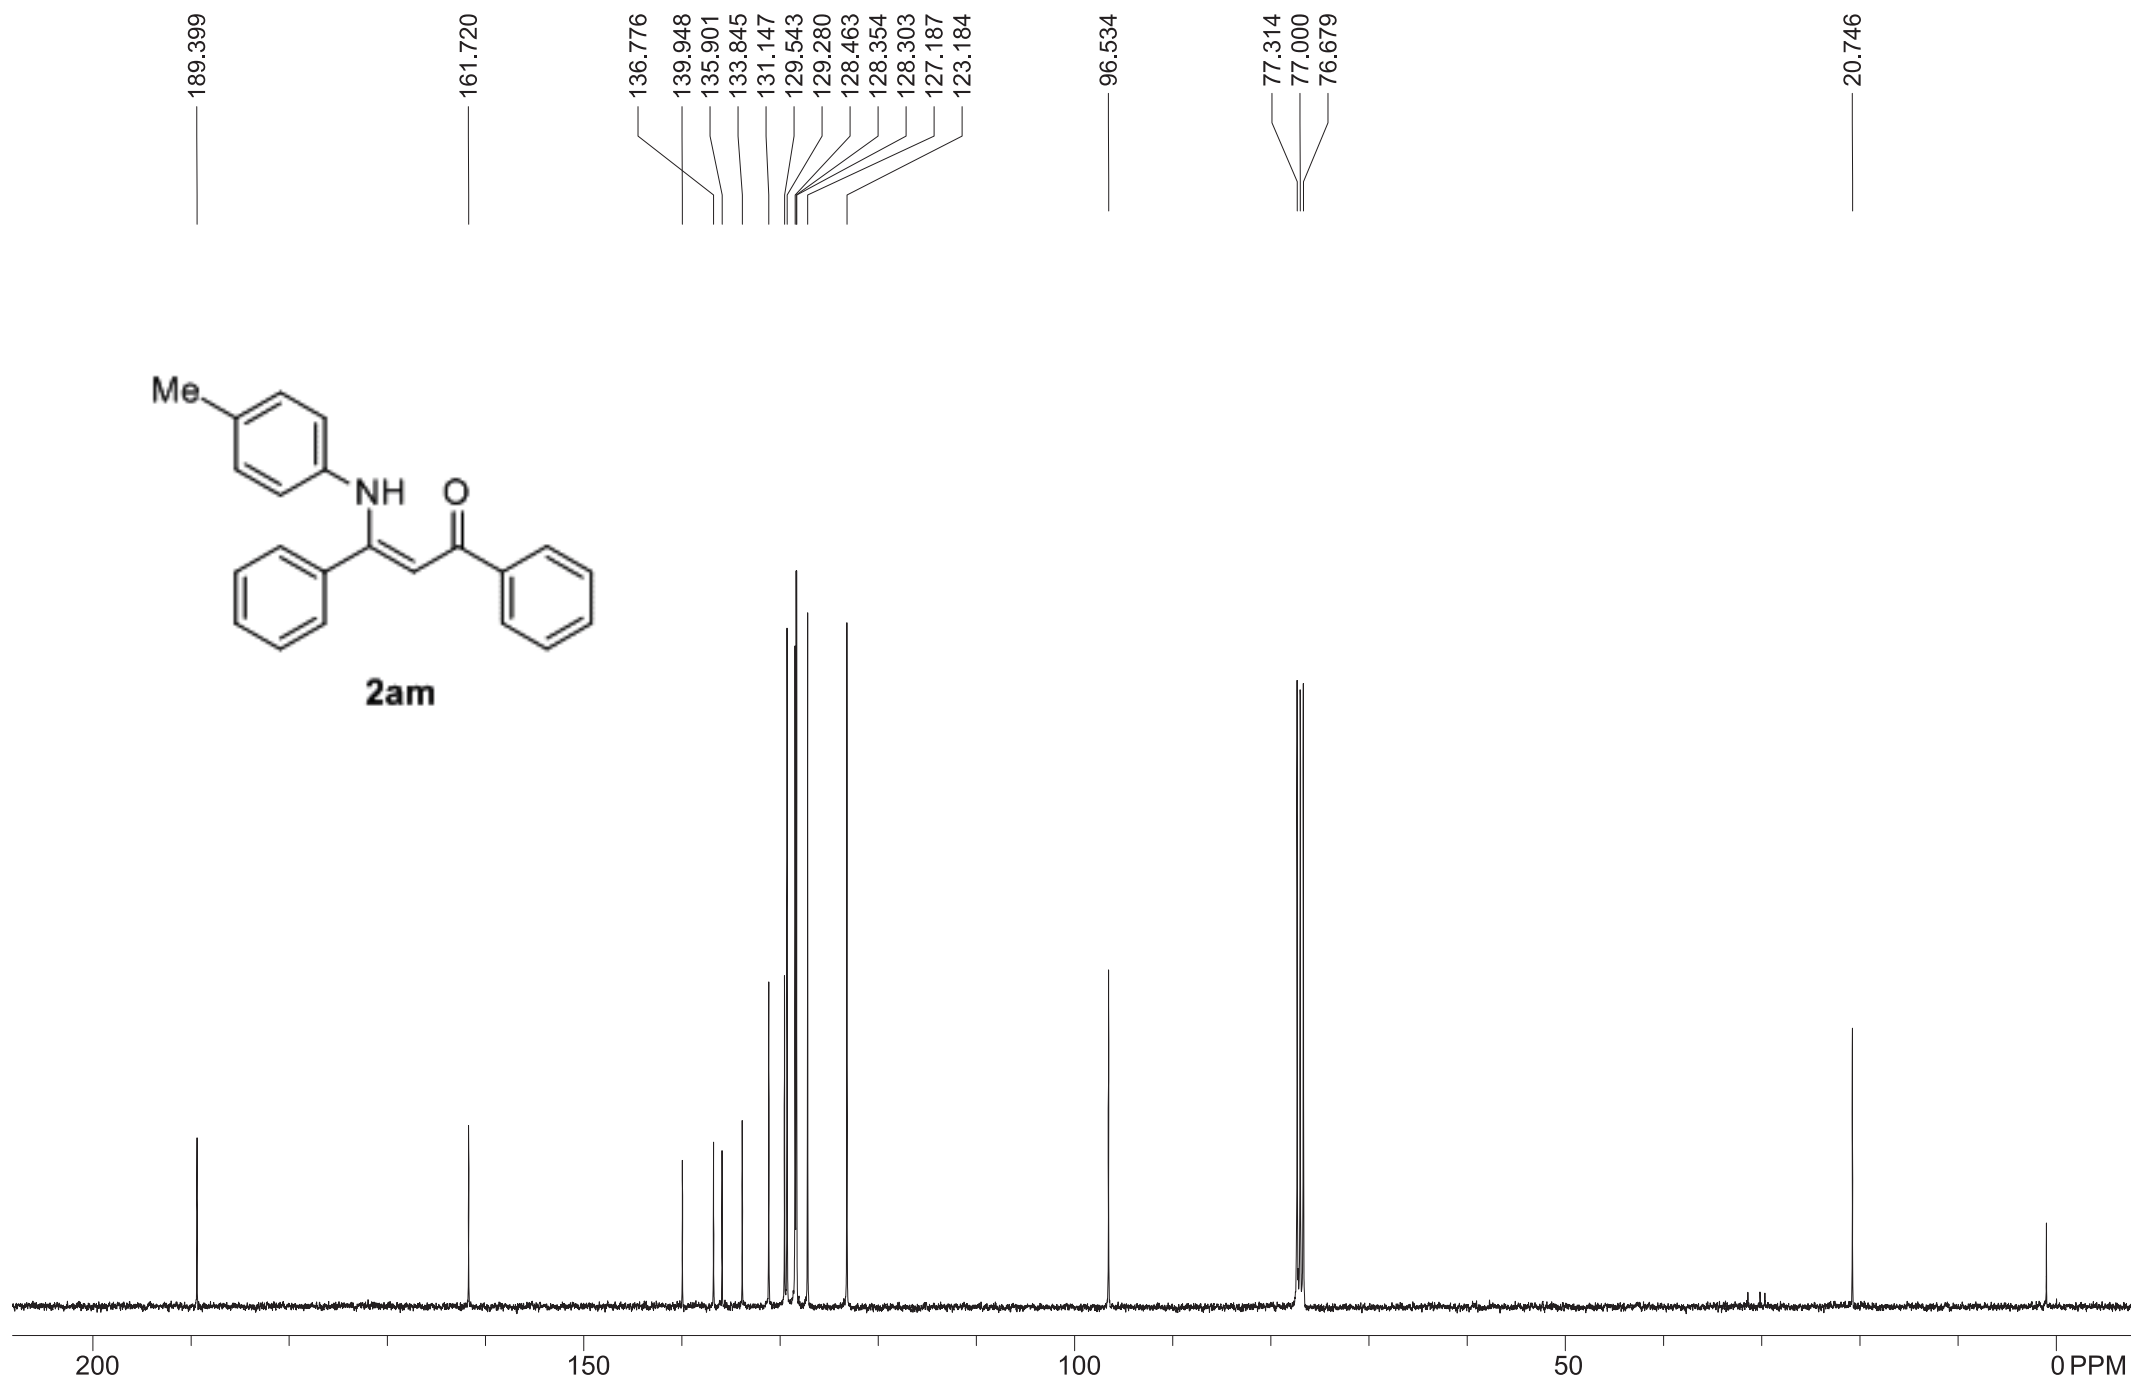

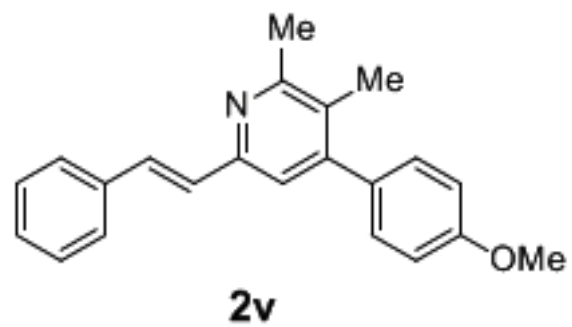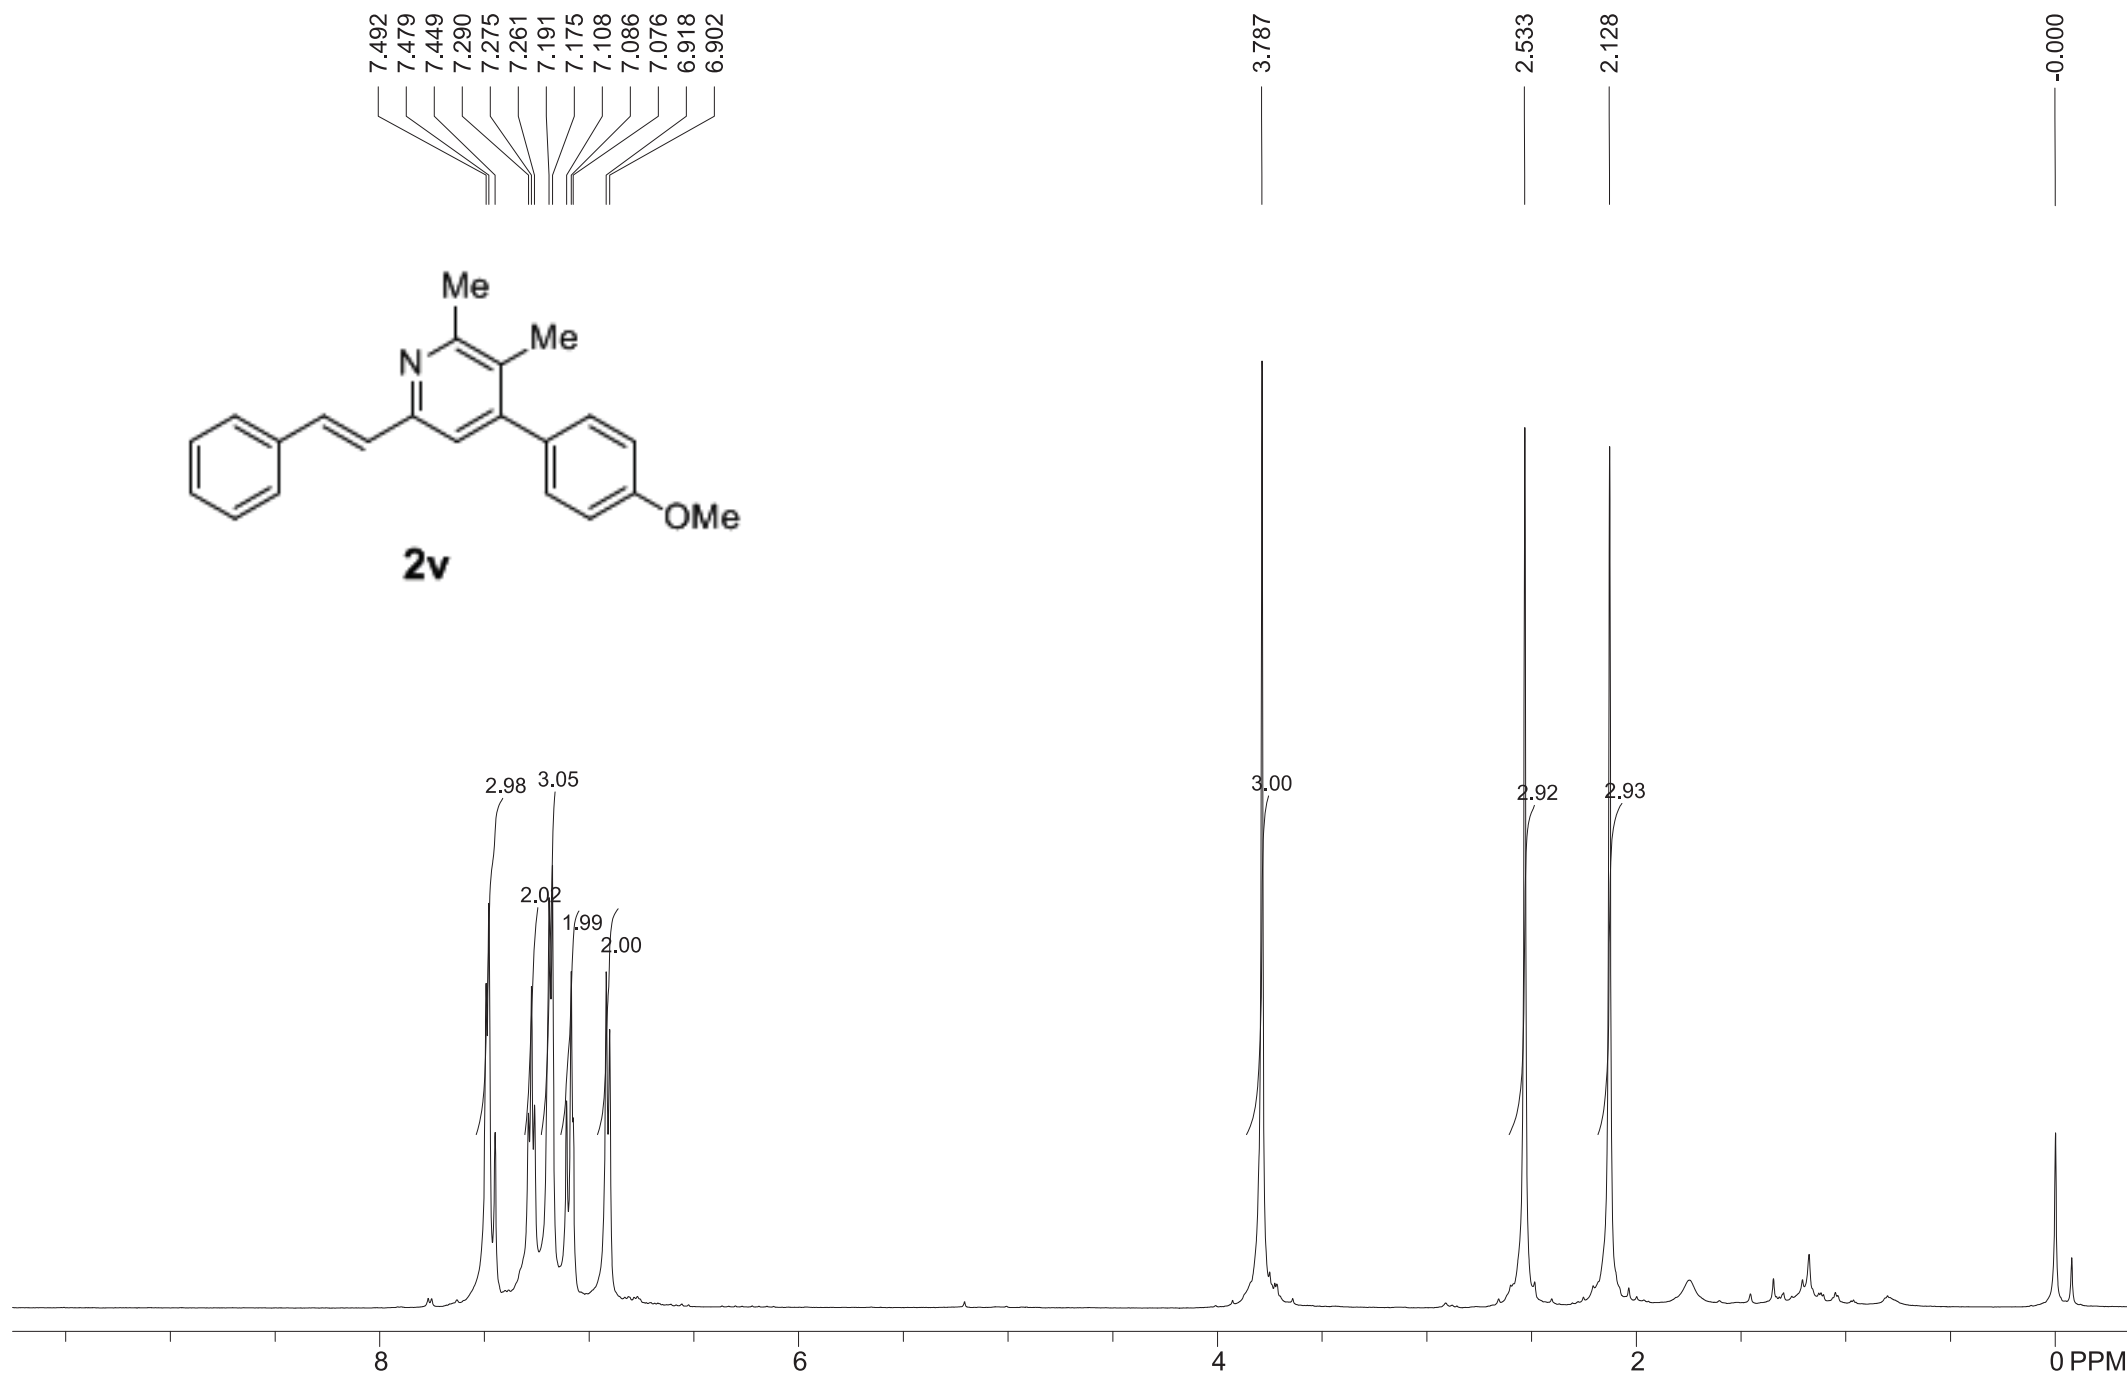

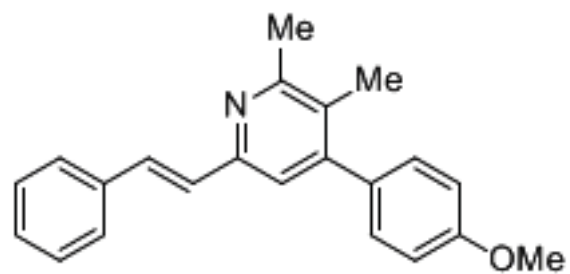

**2v**

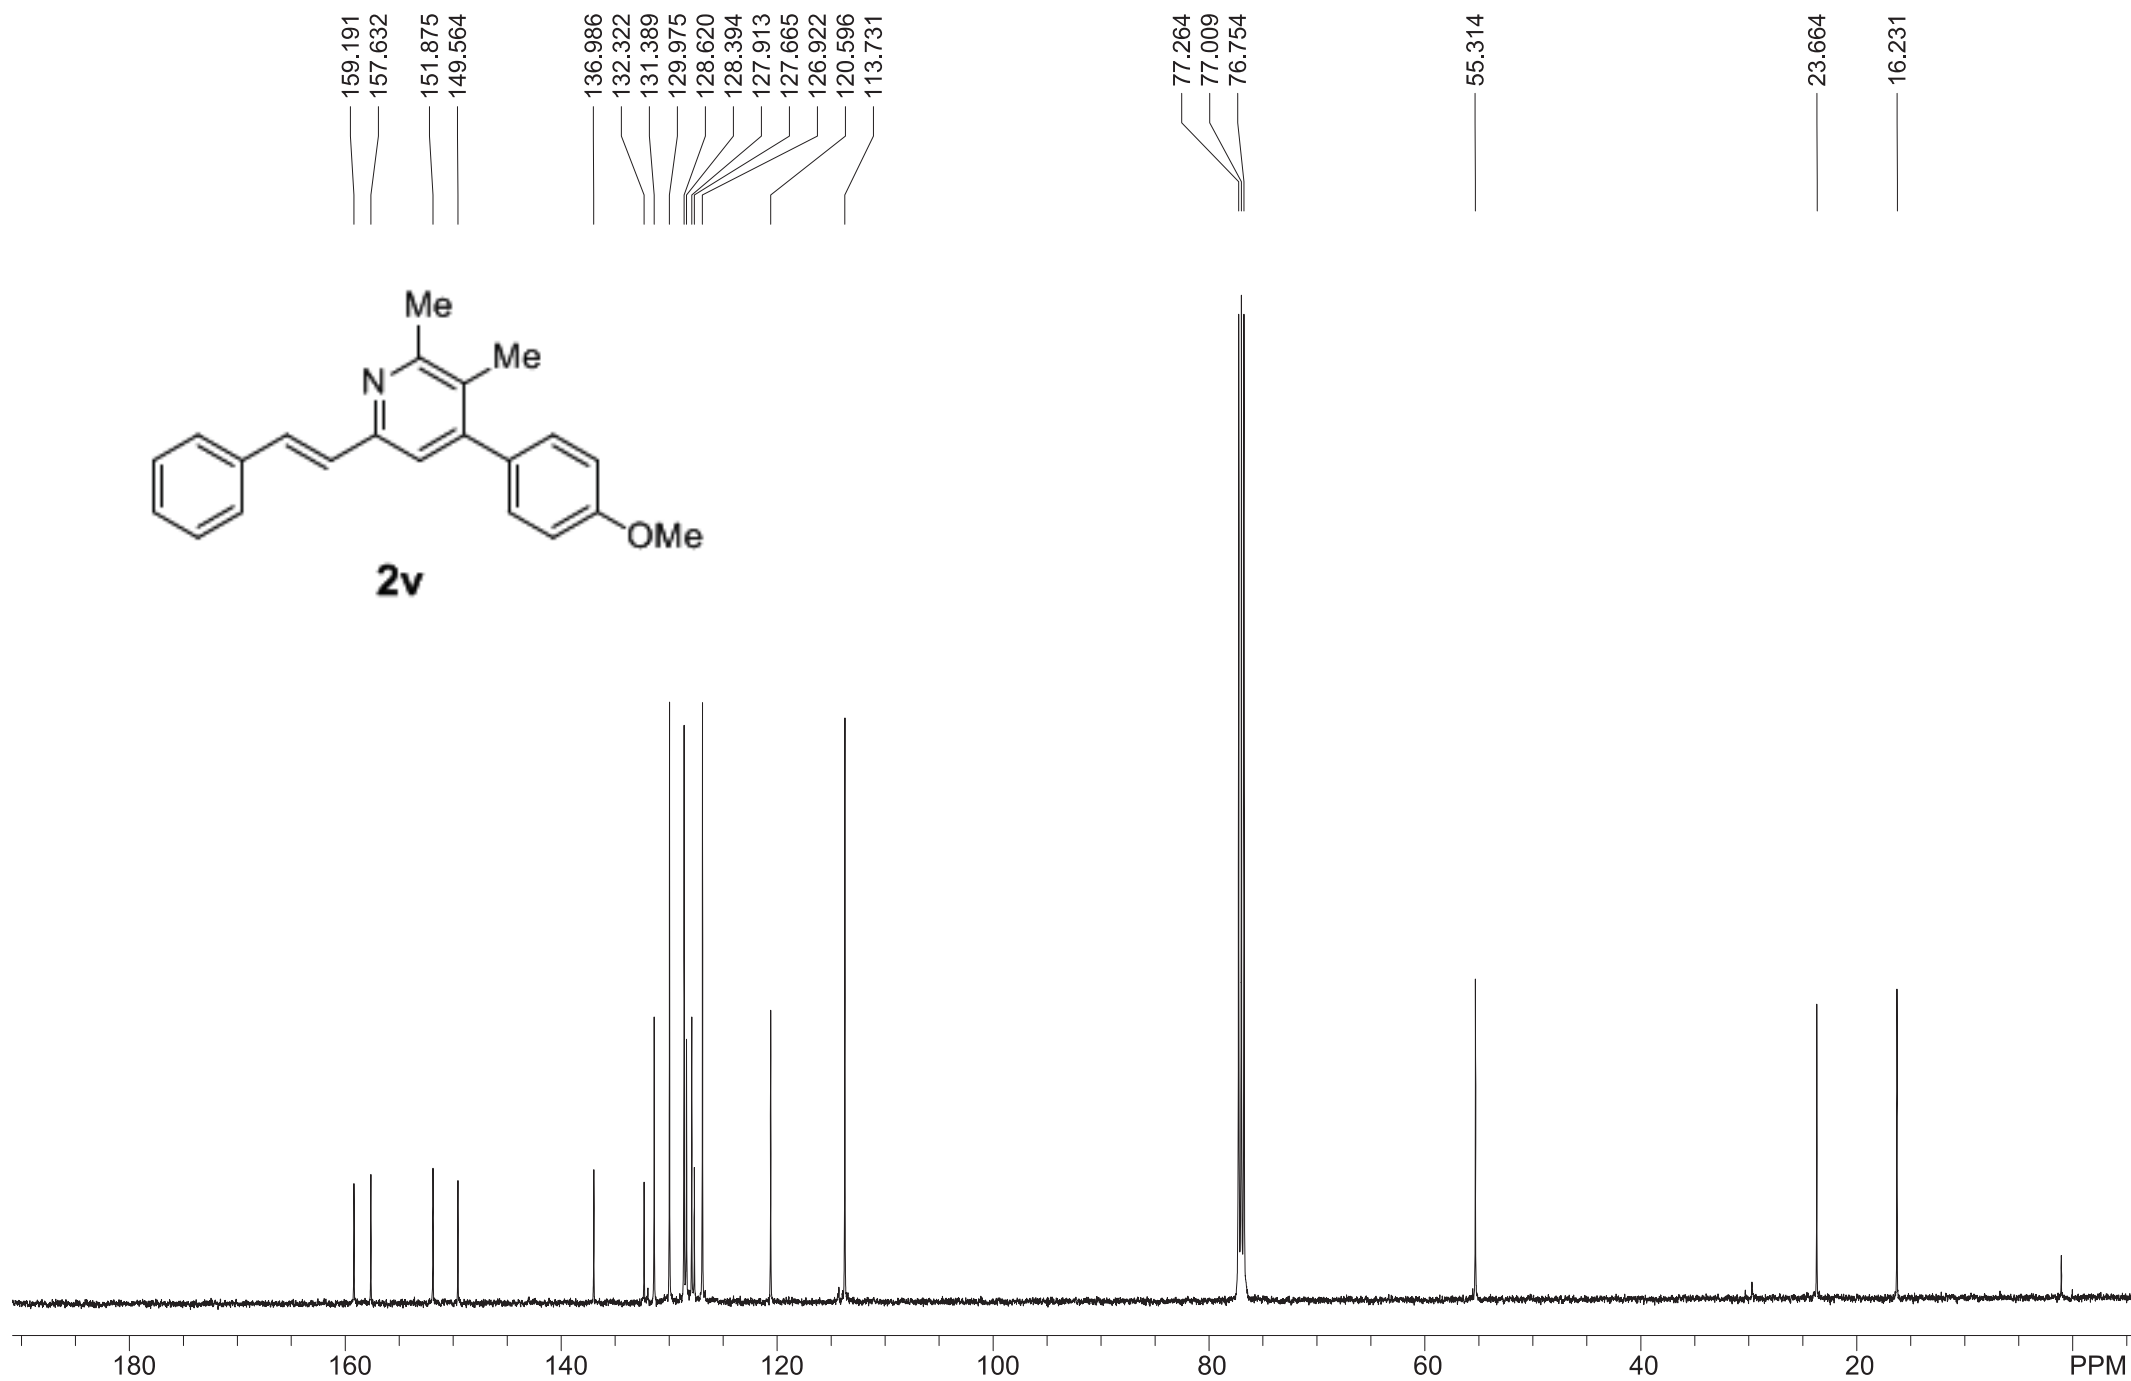

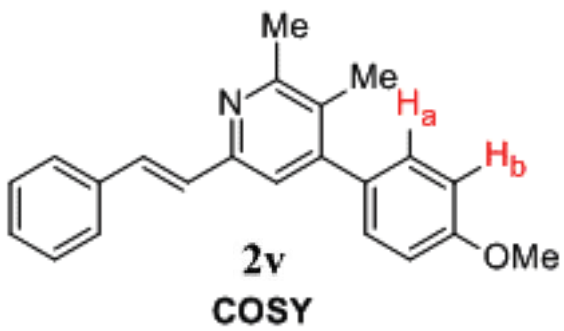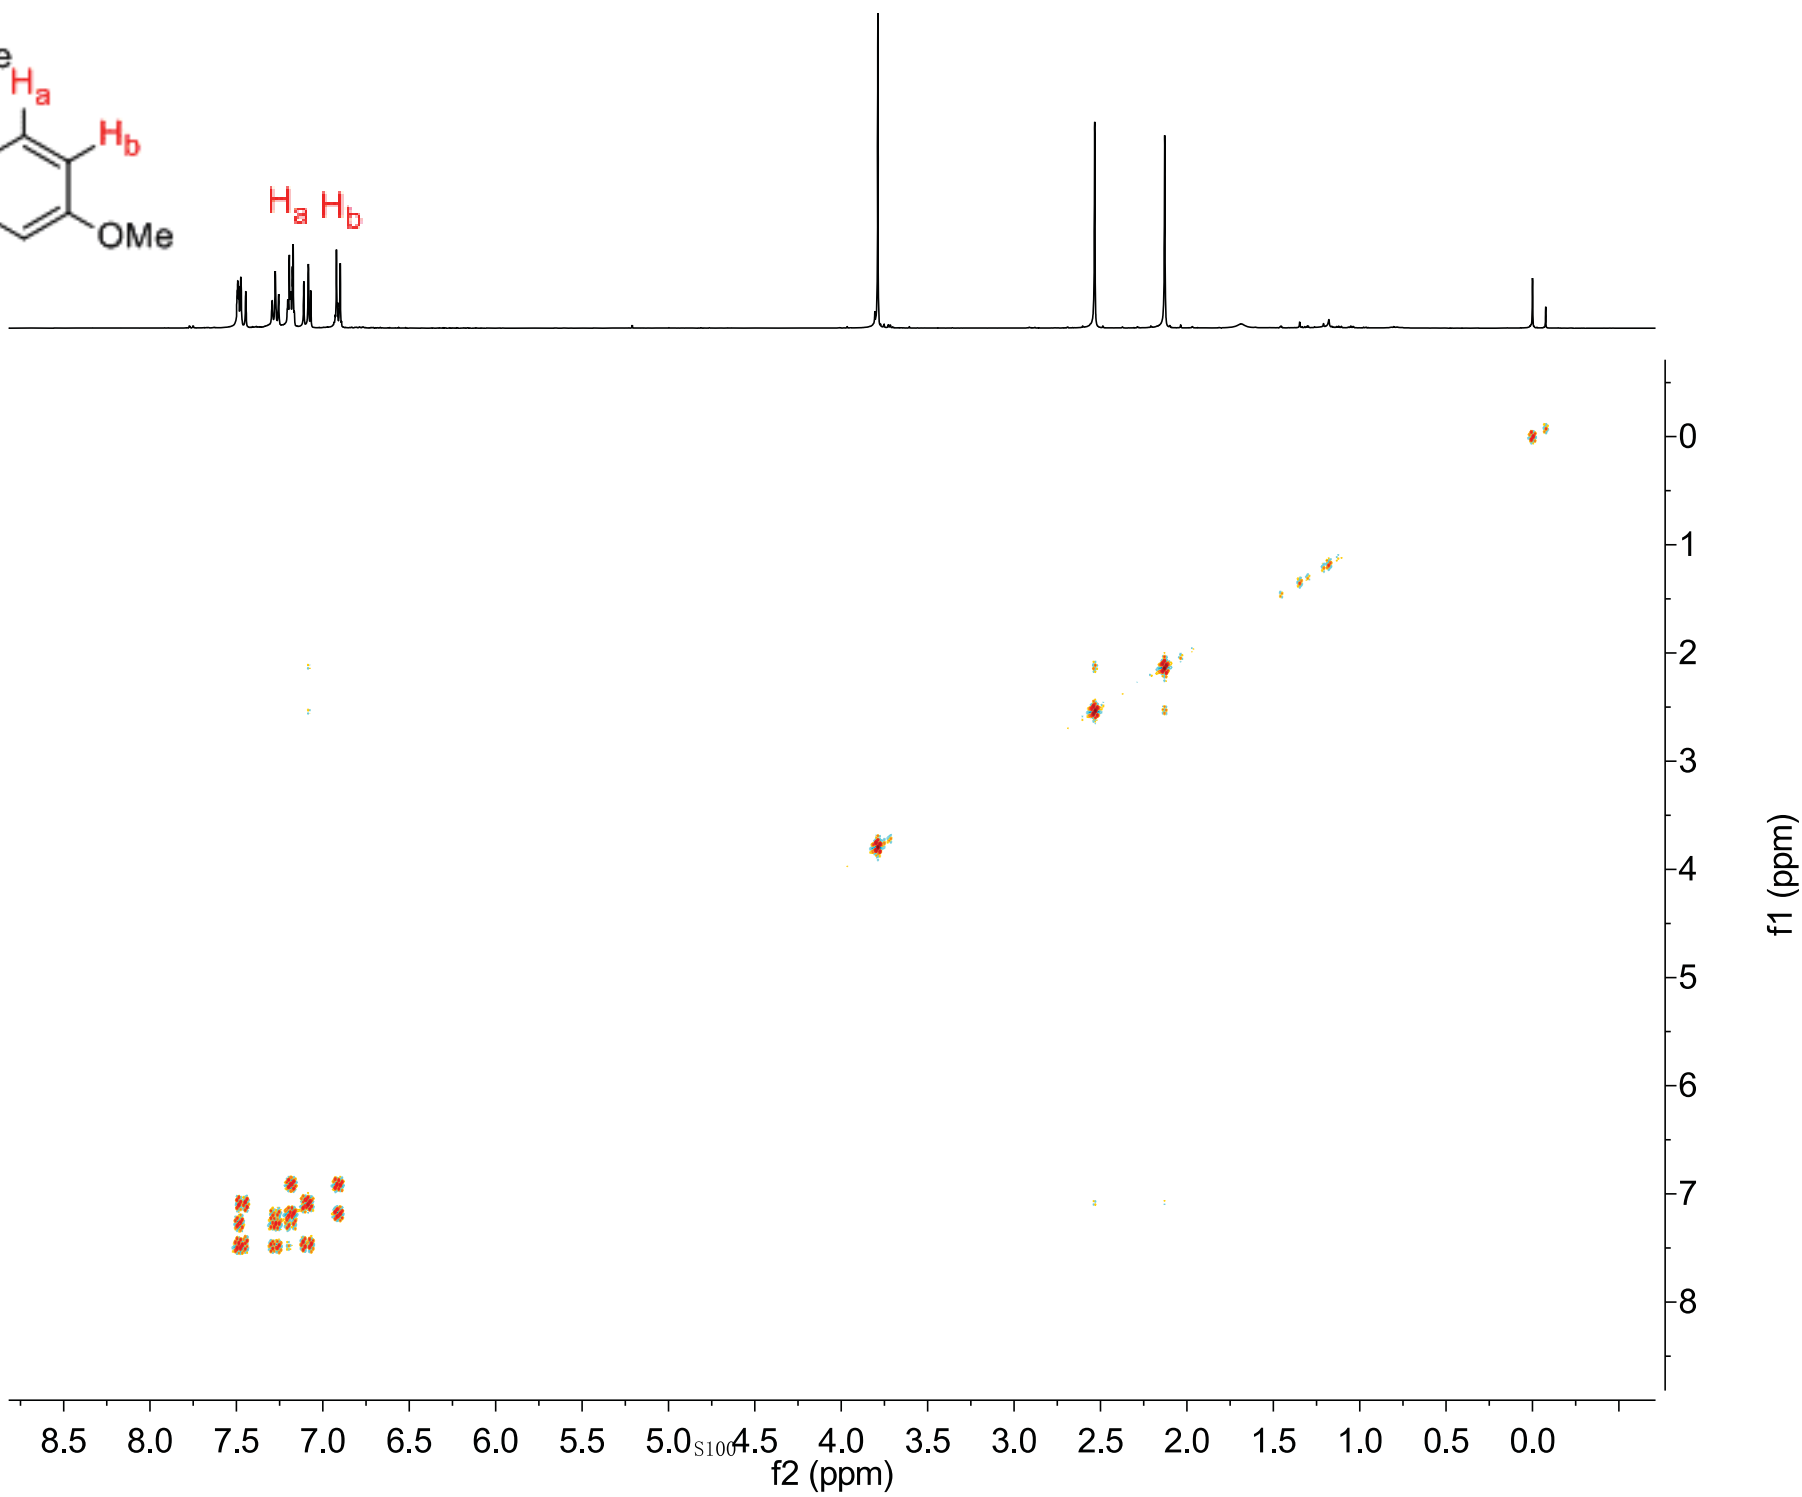



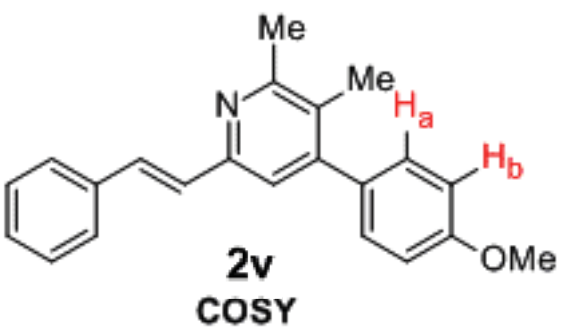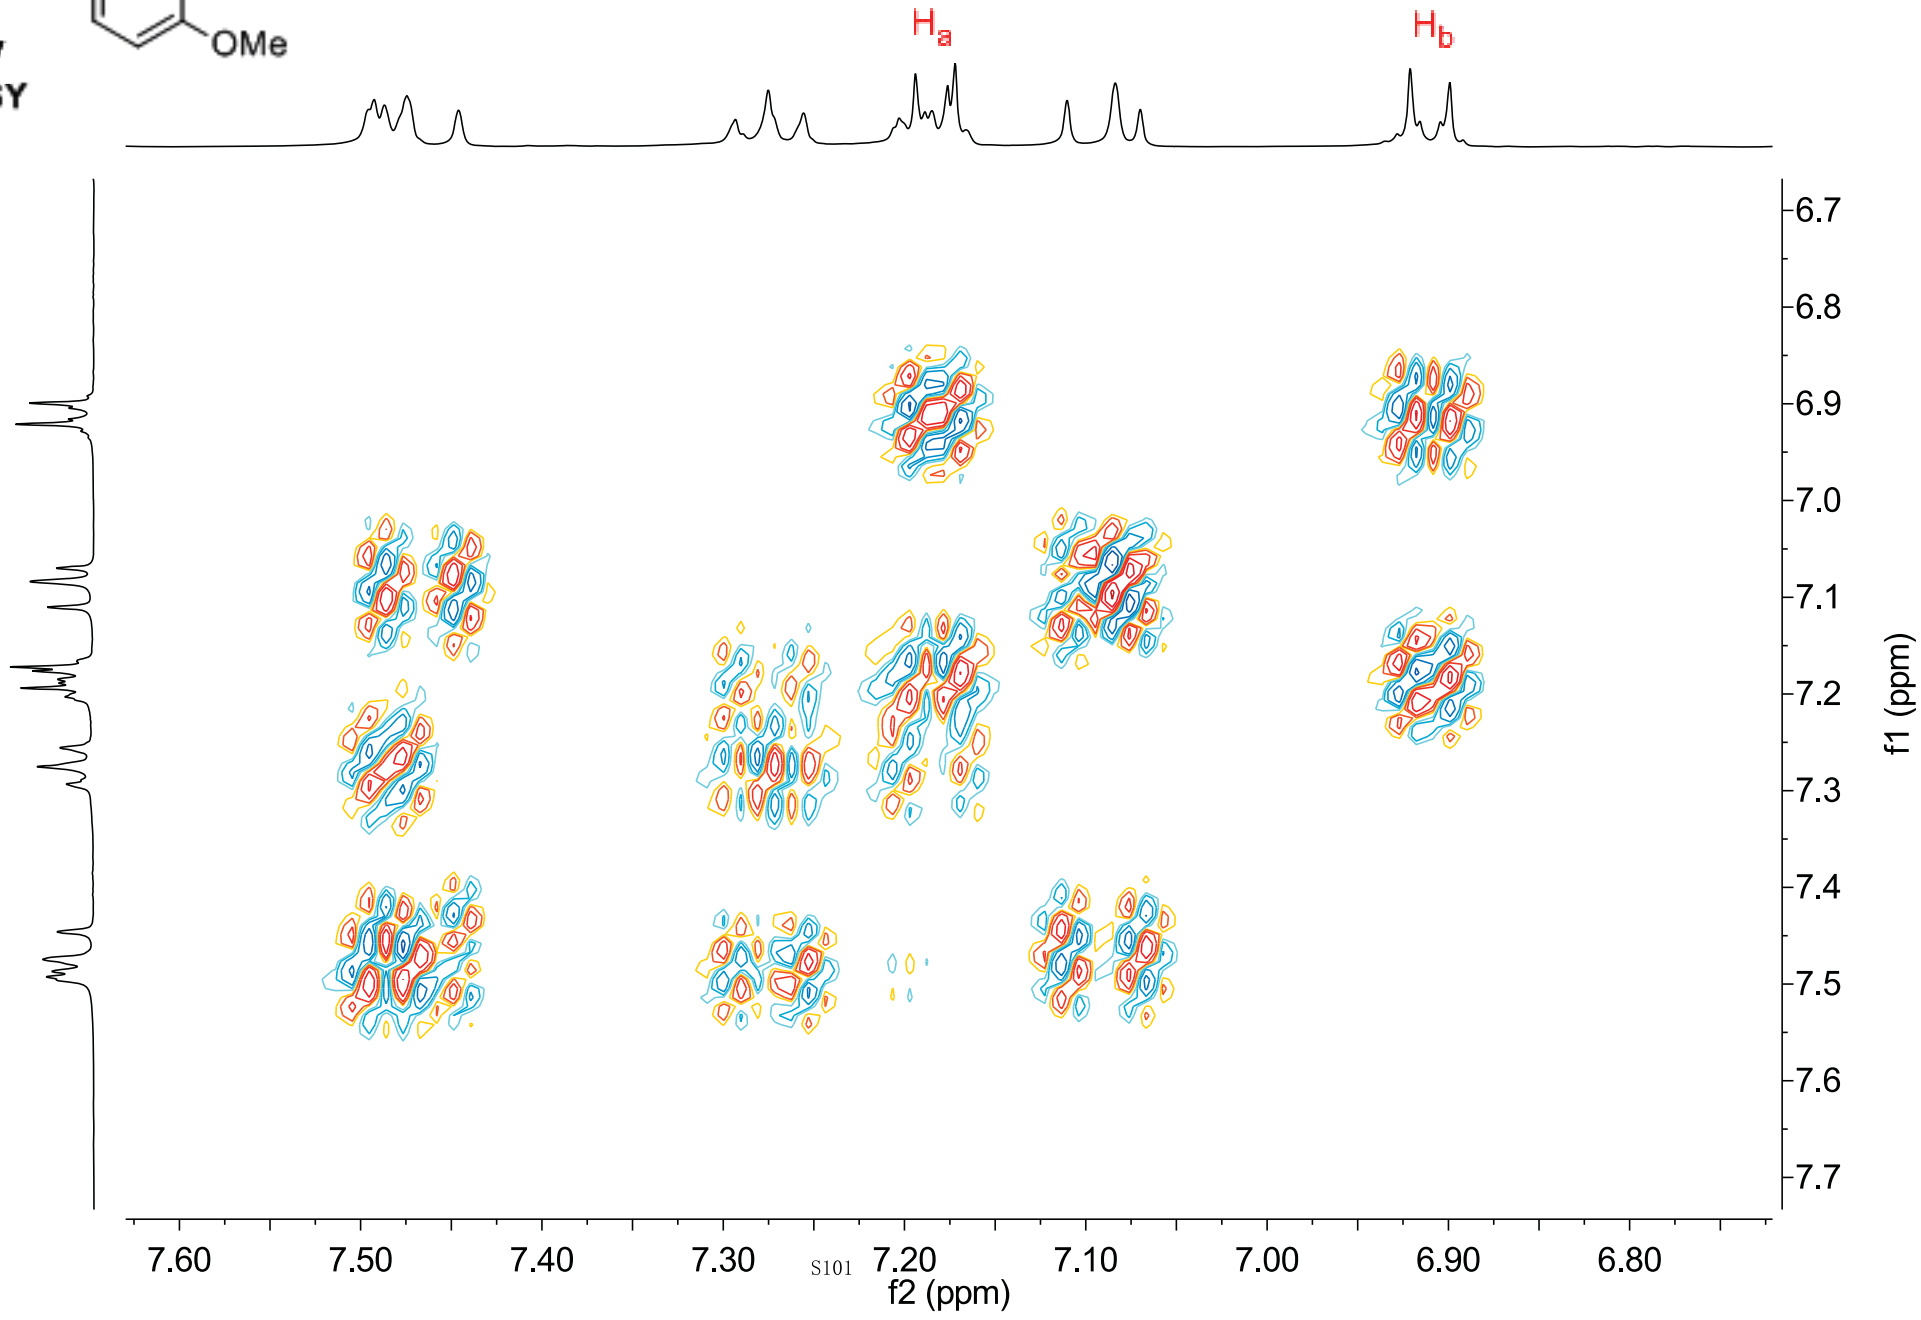

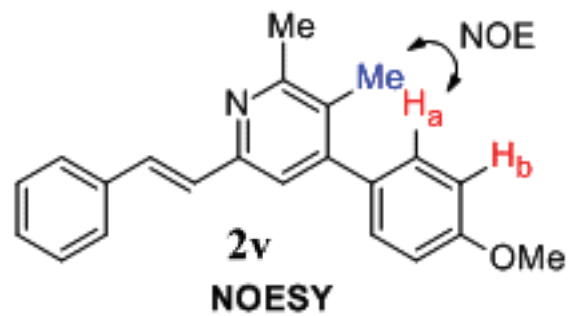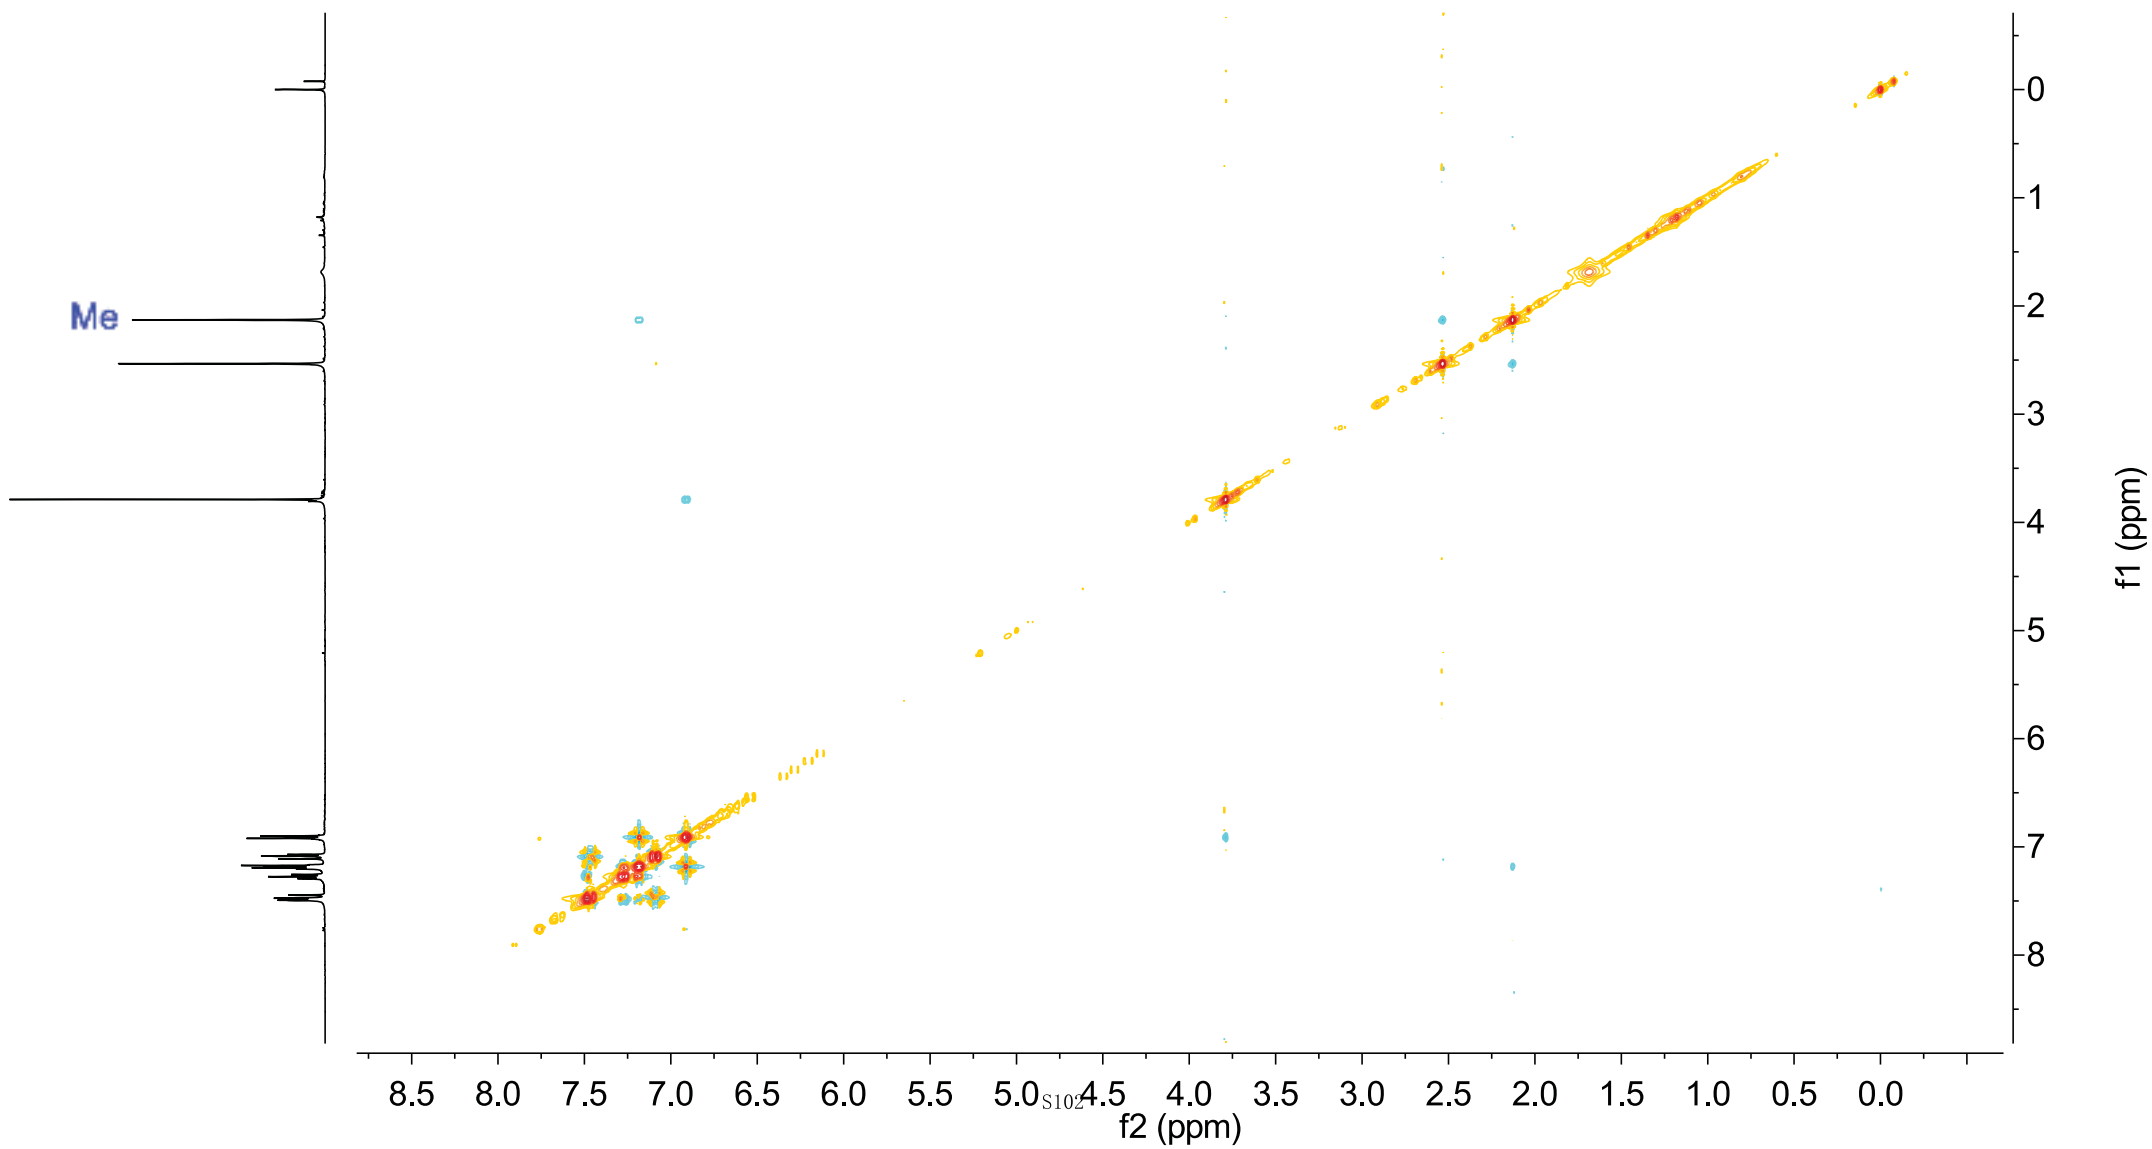

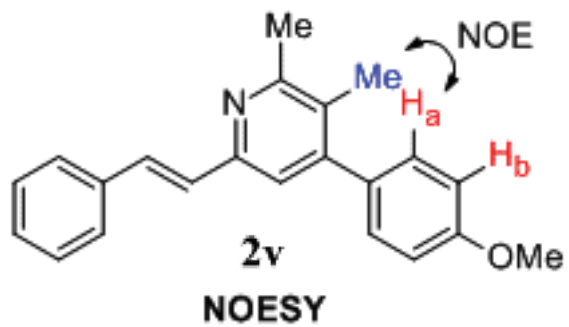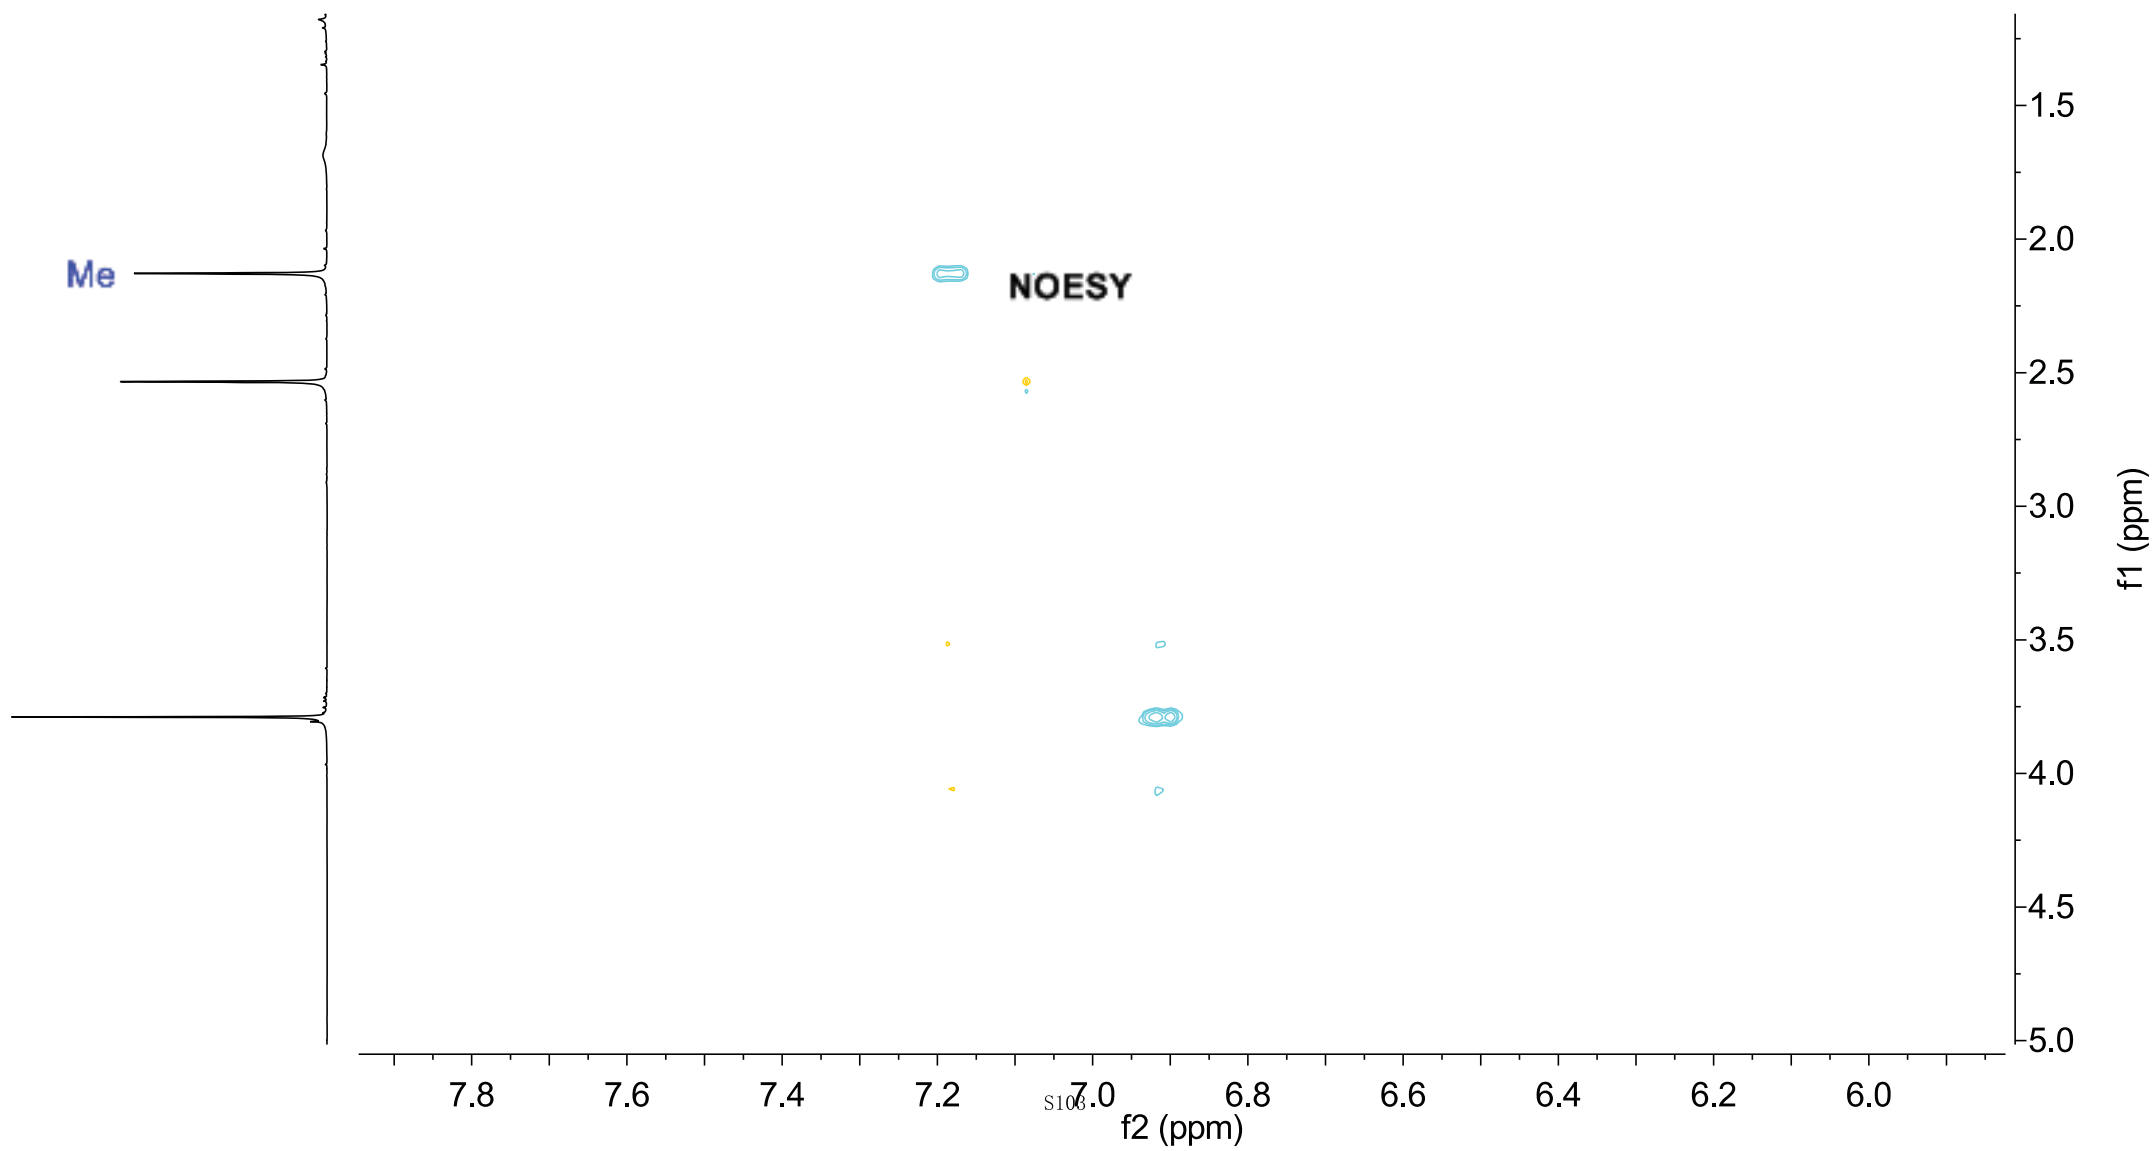

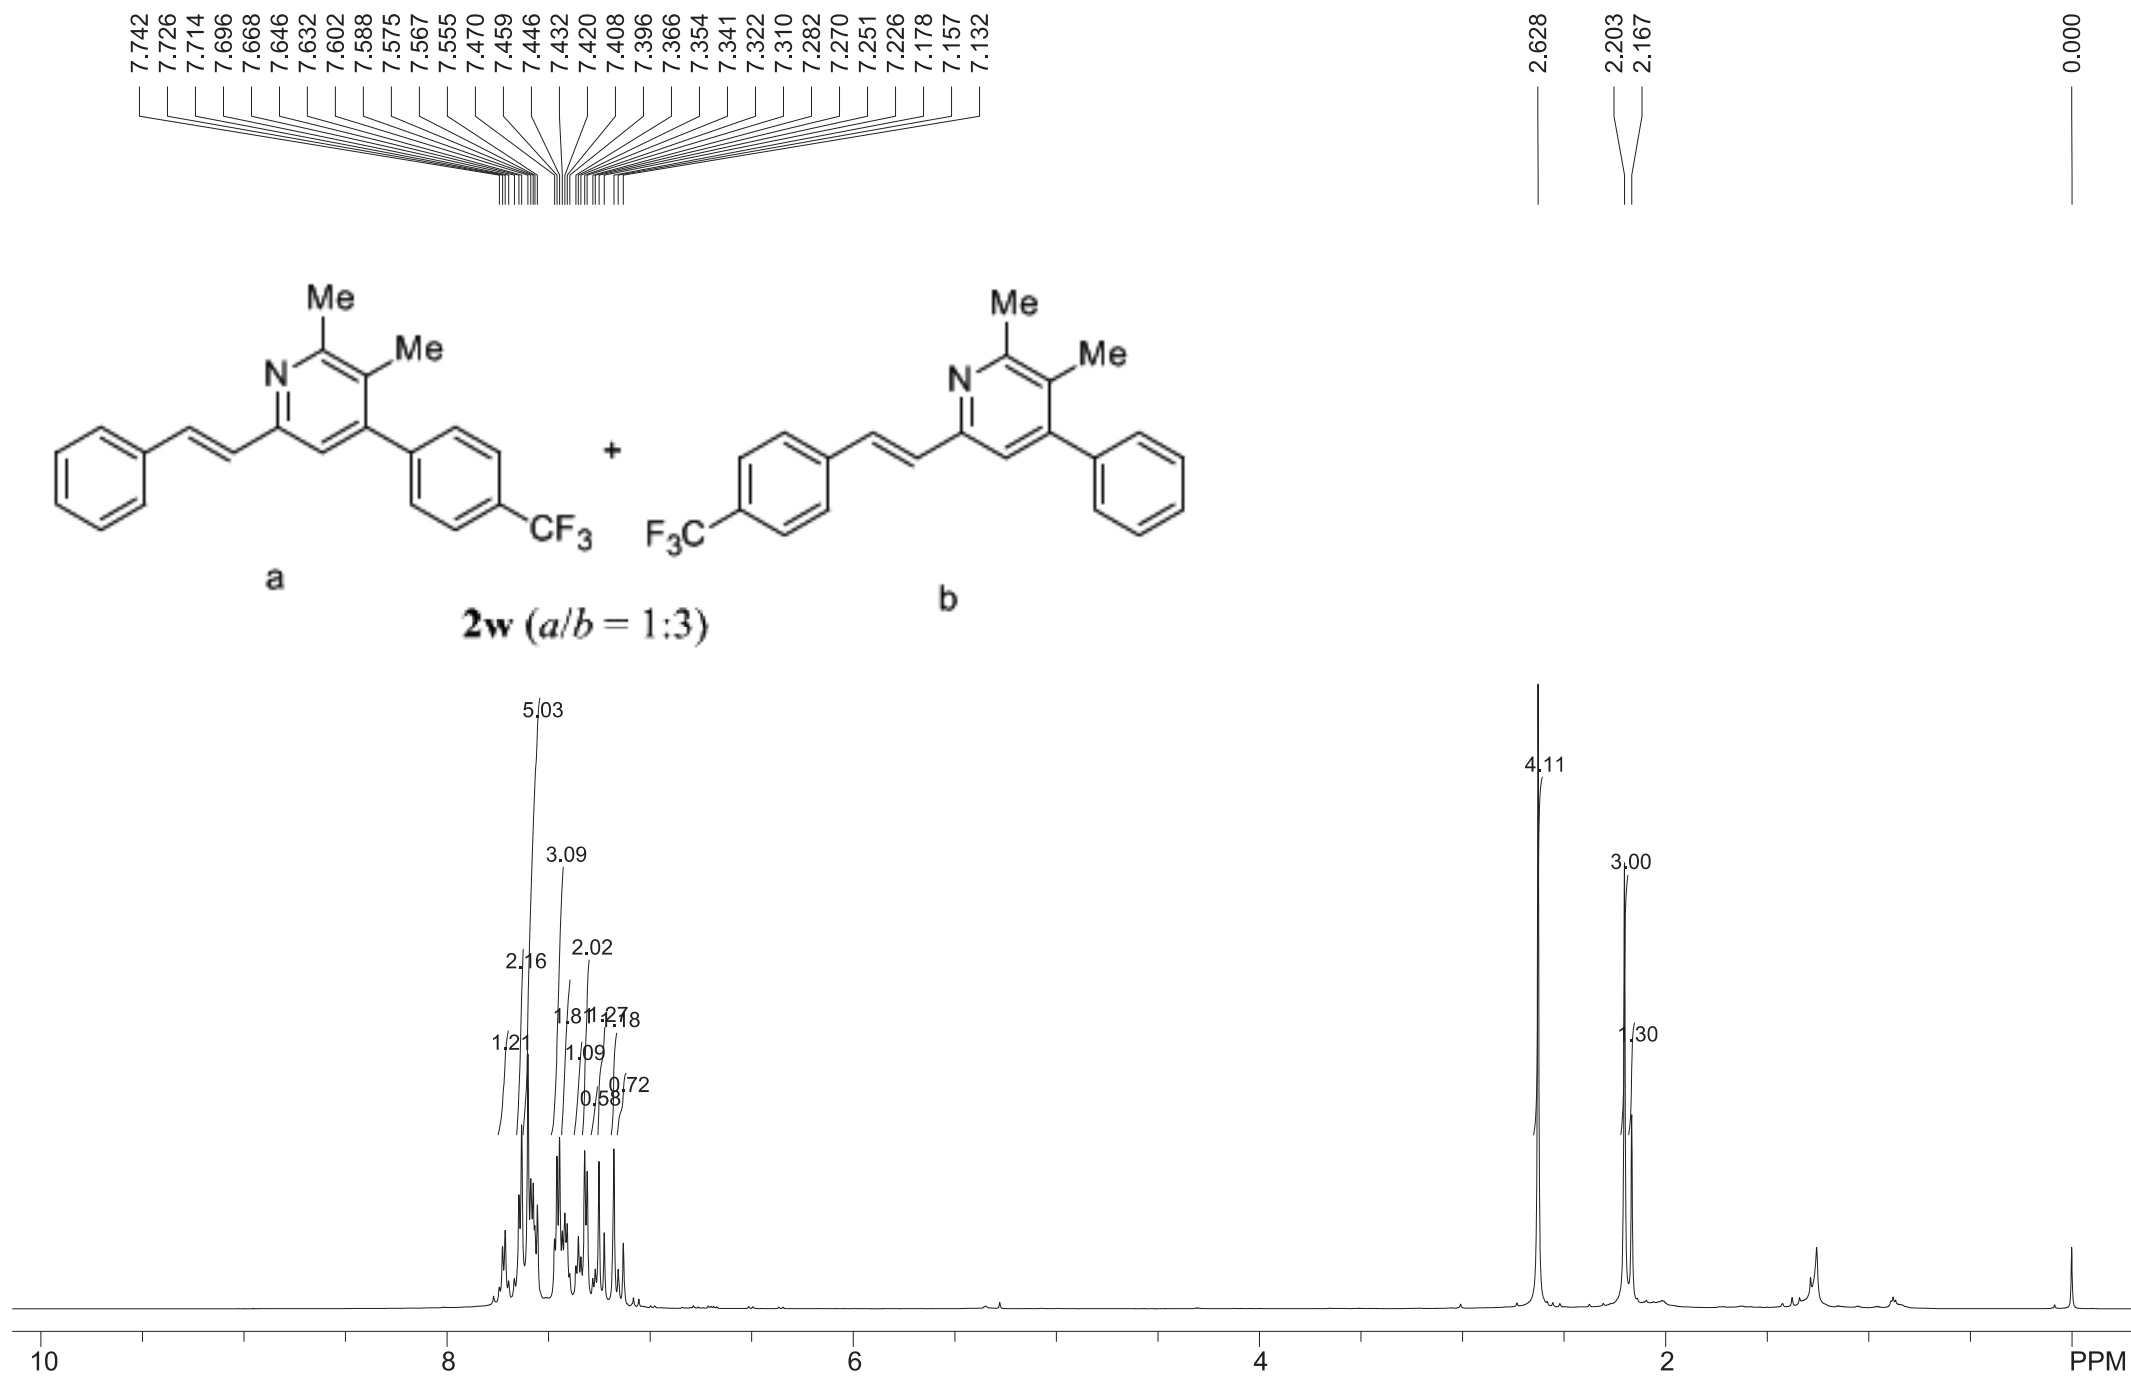

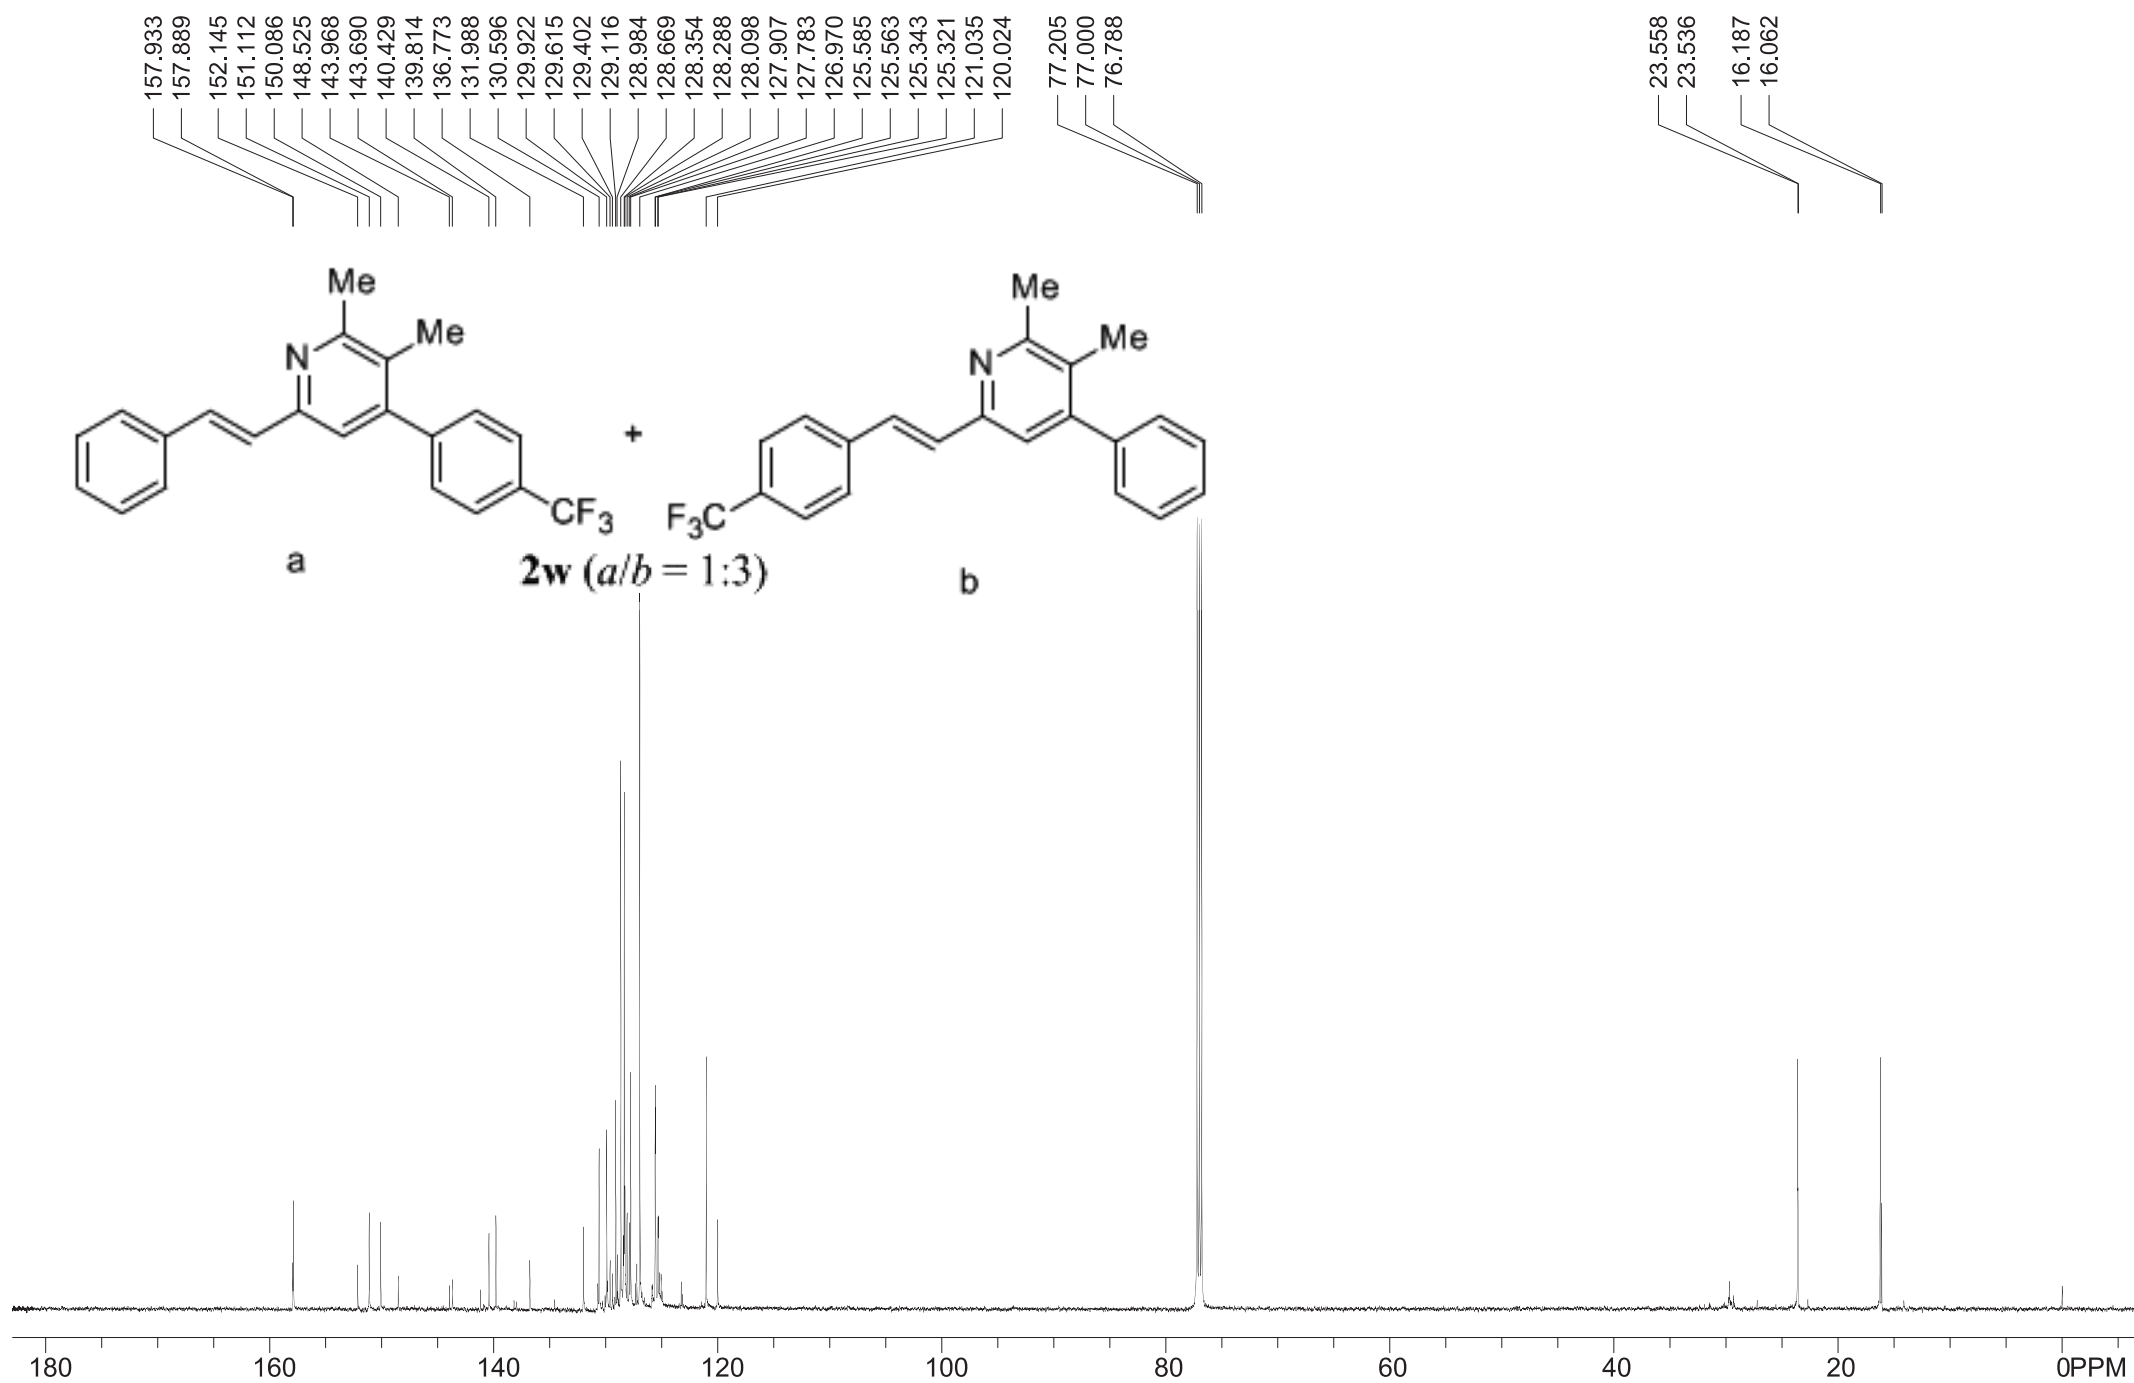

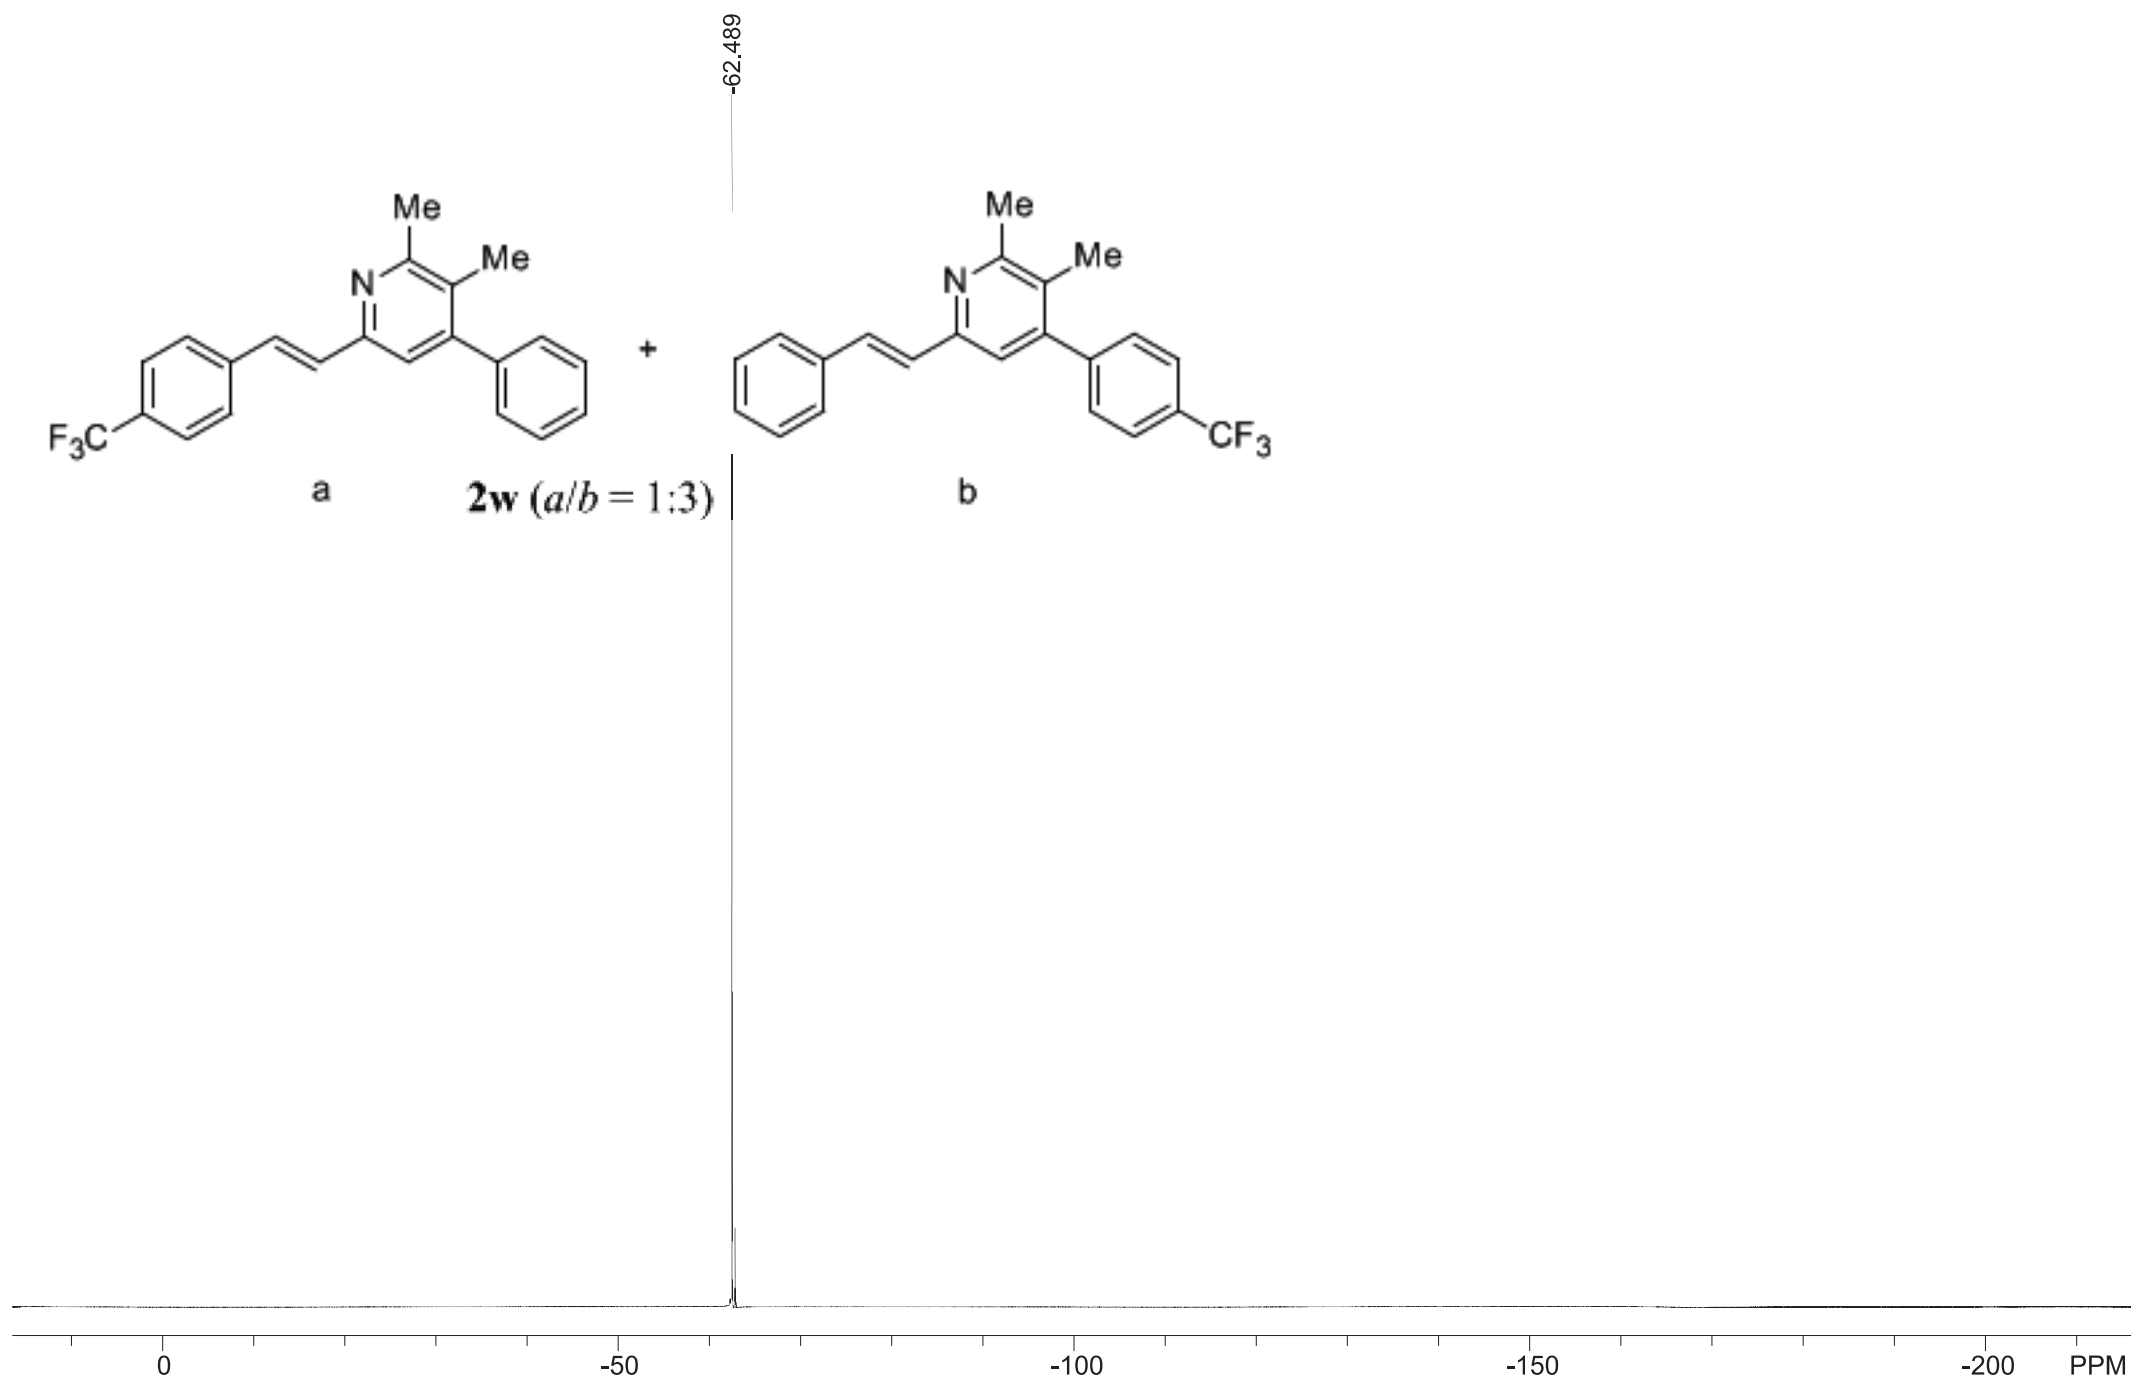

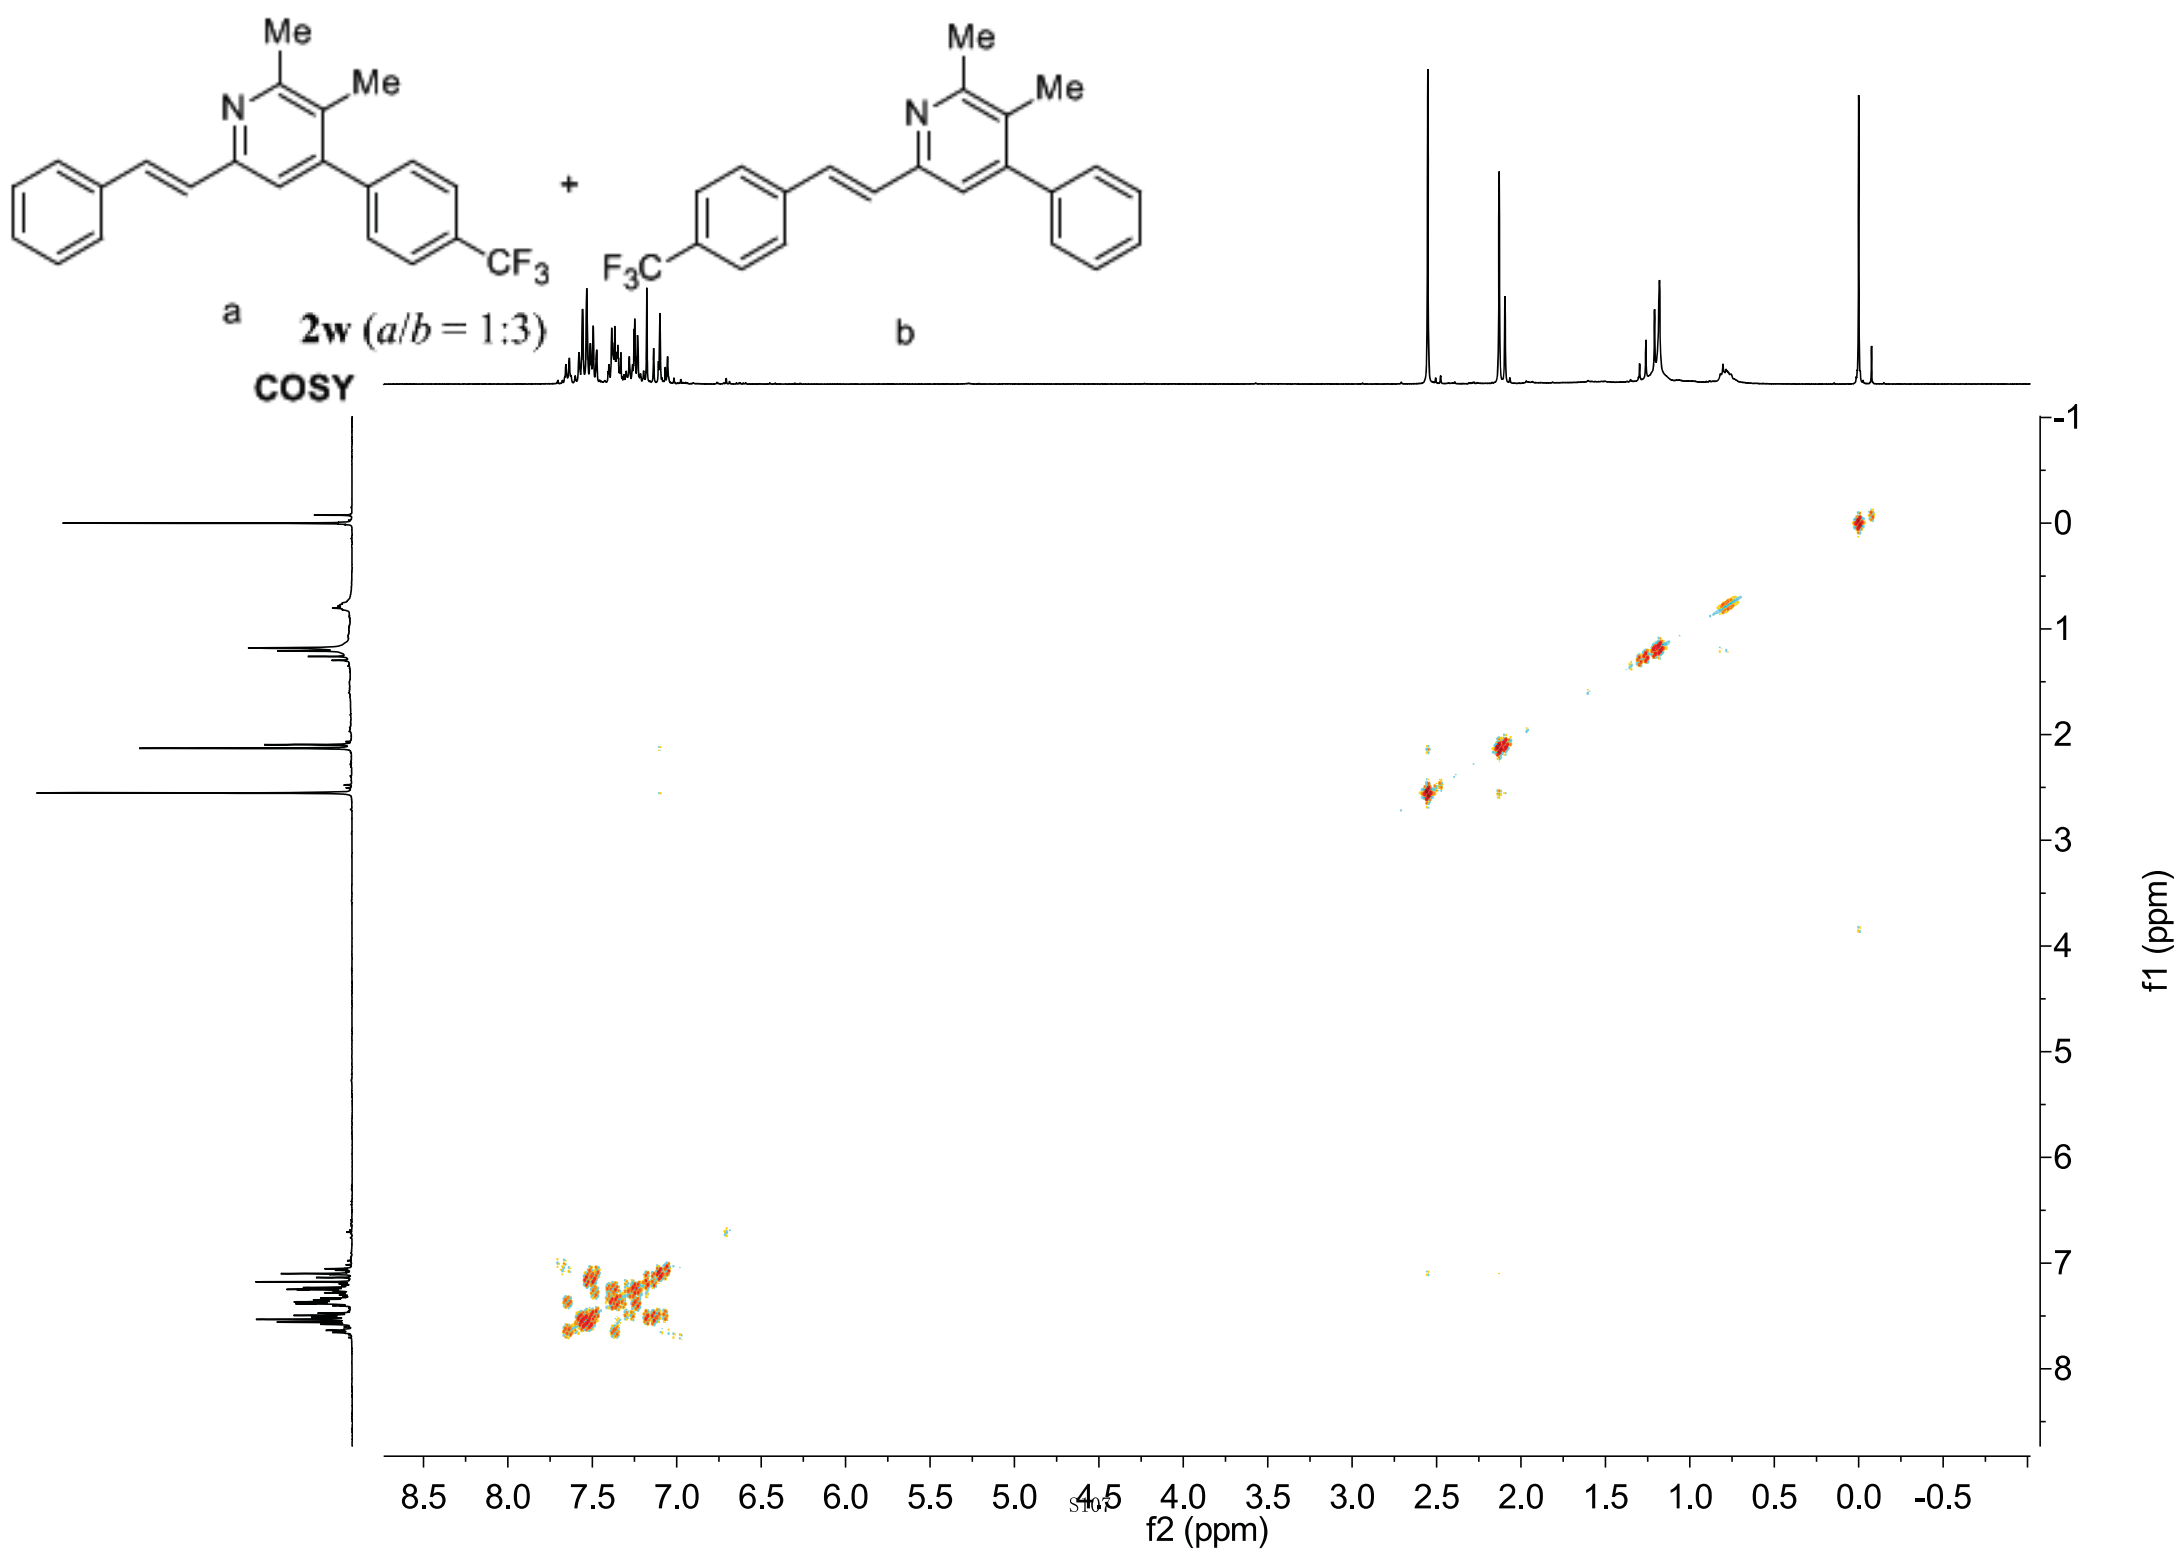

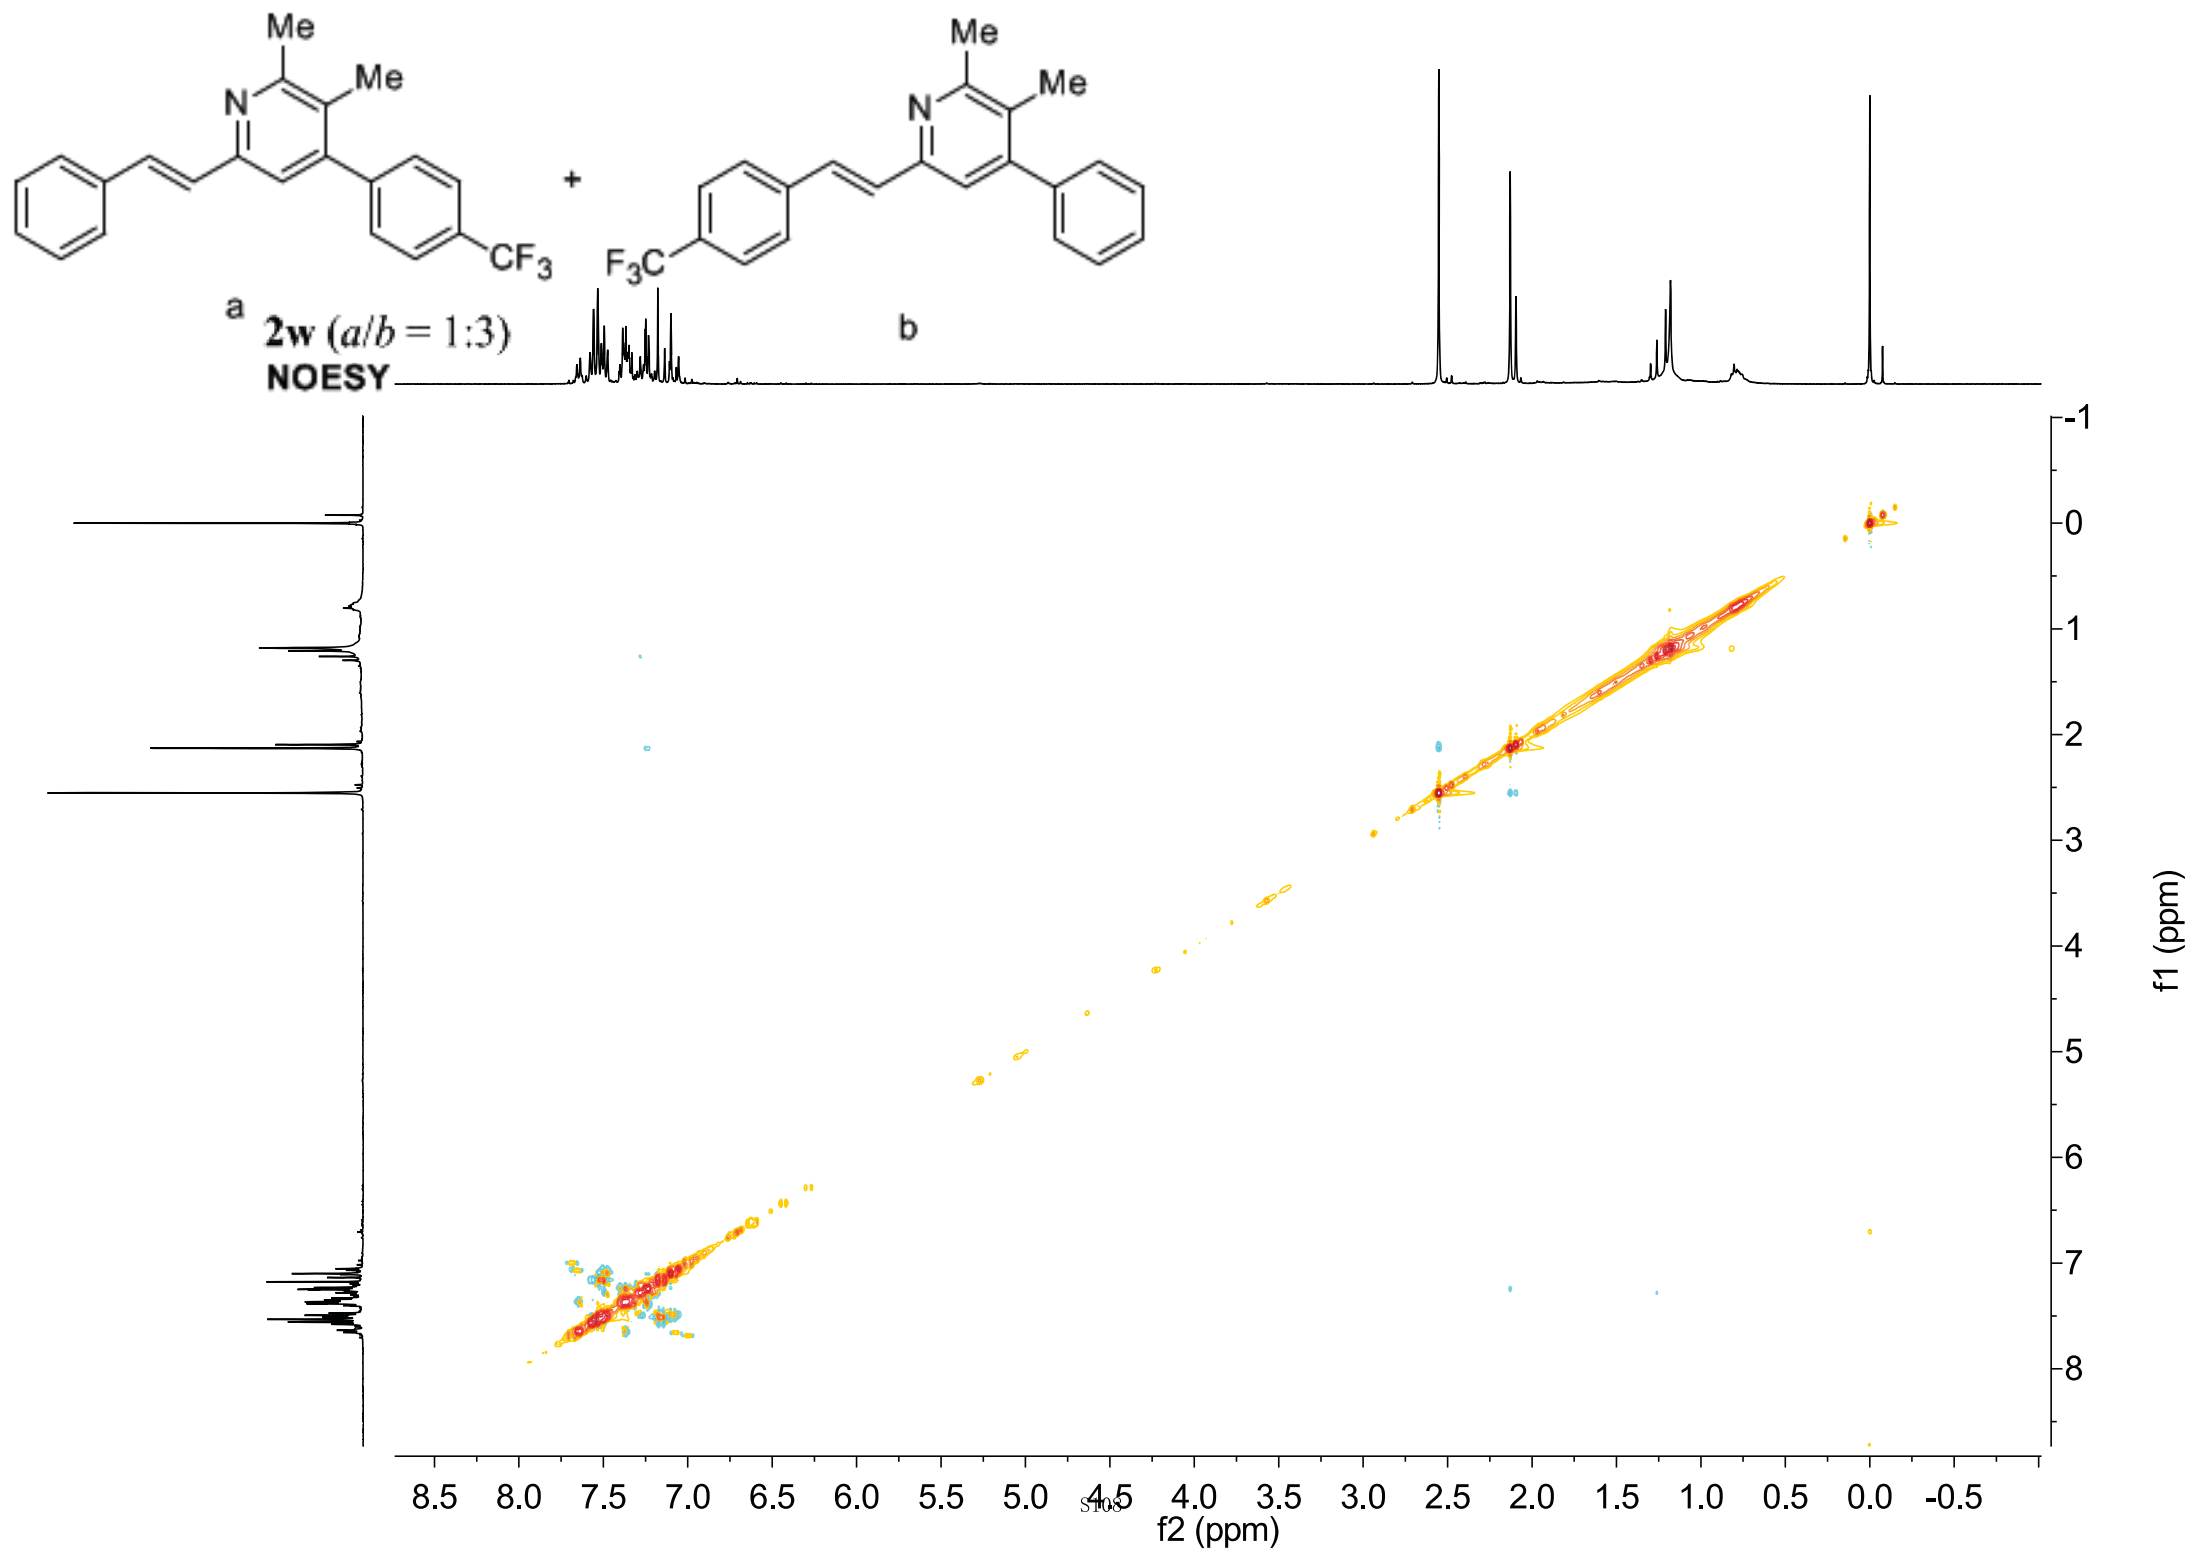



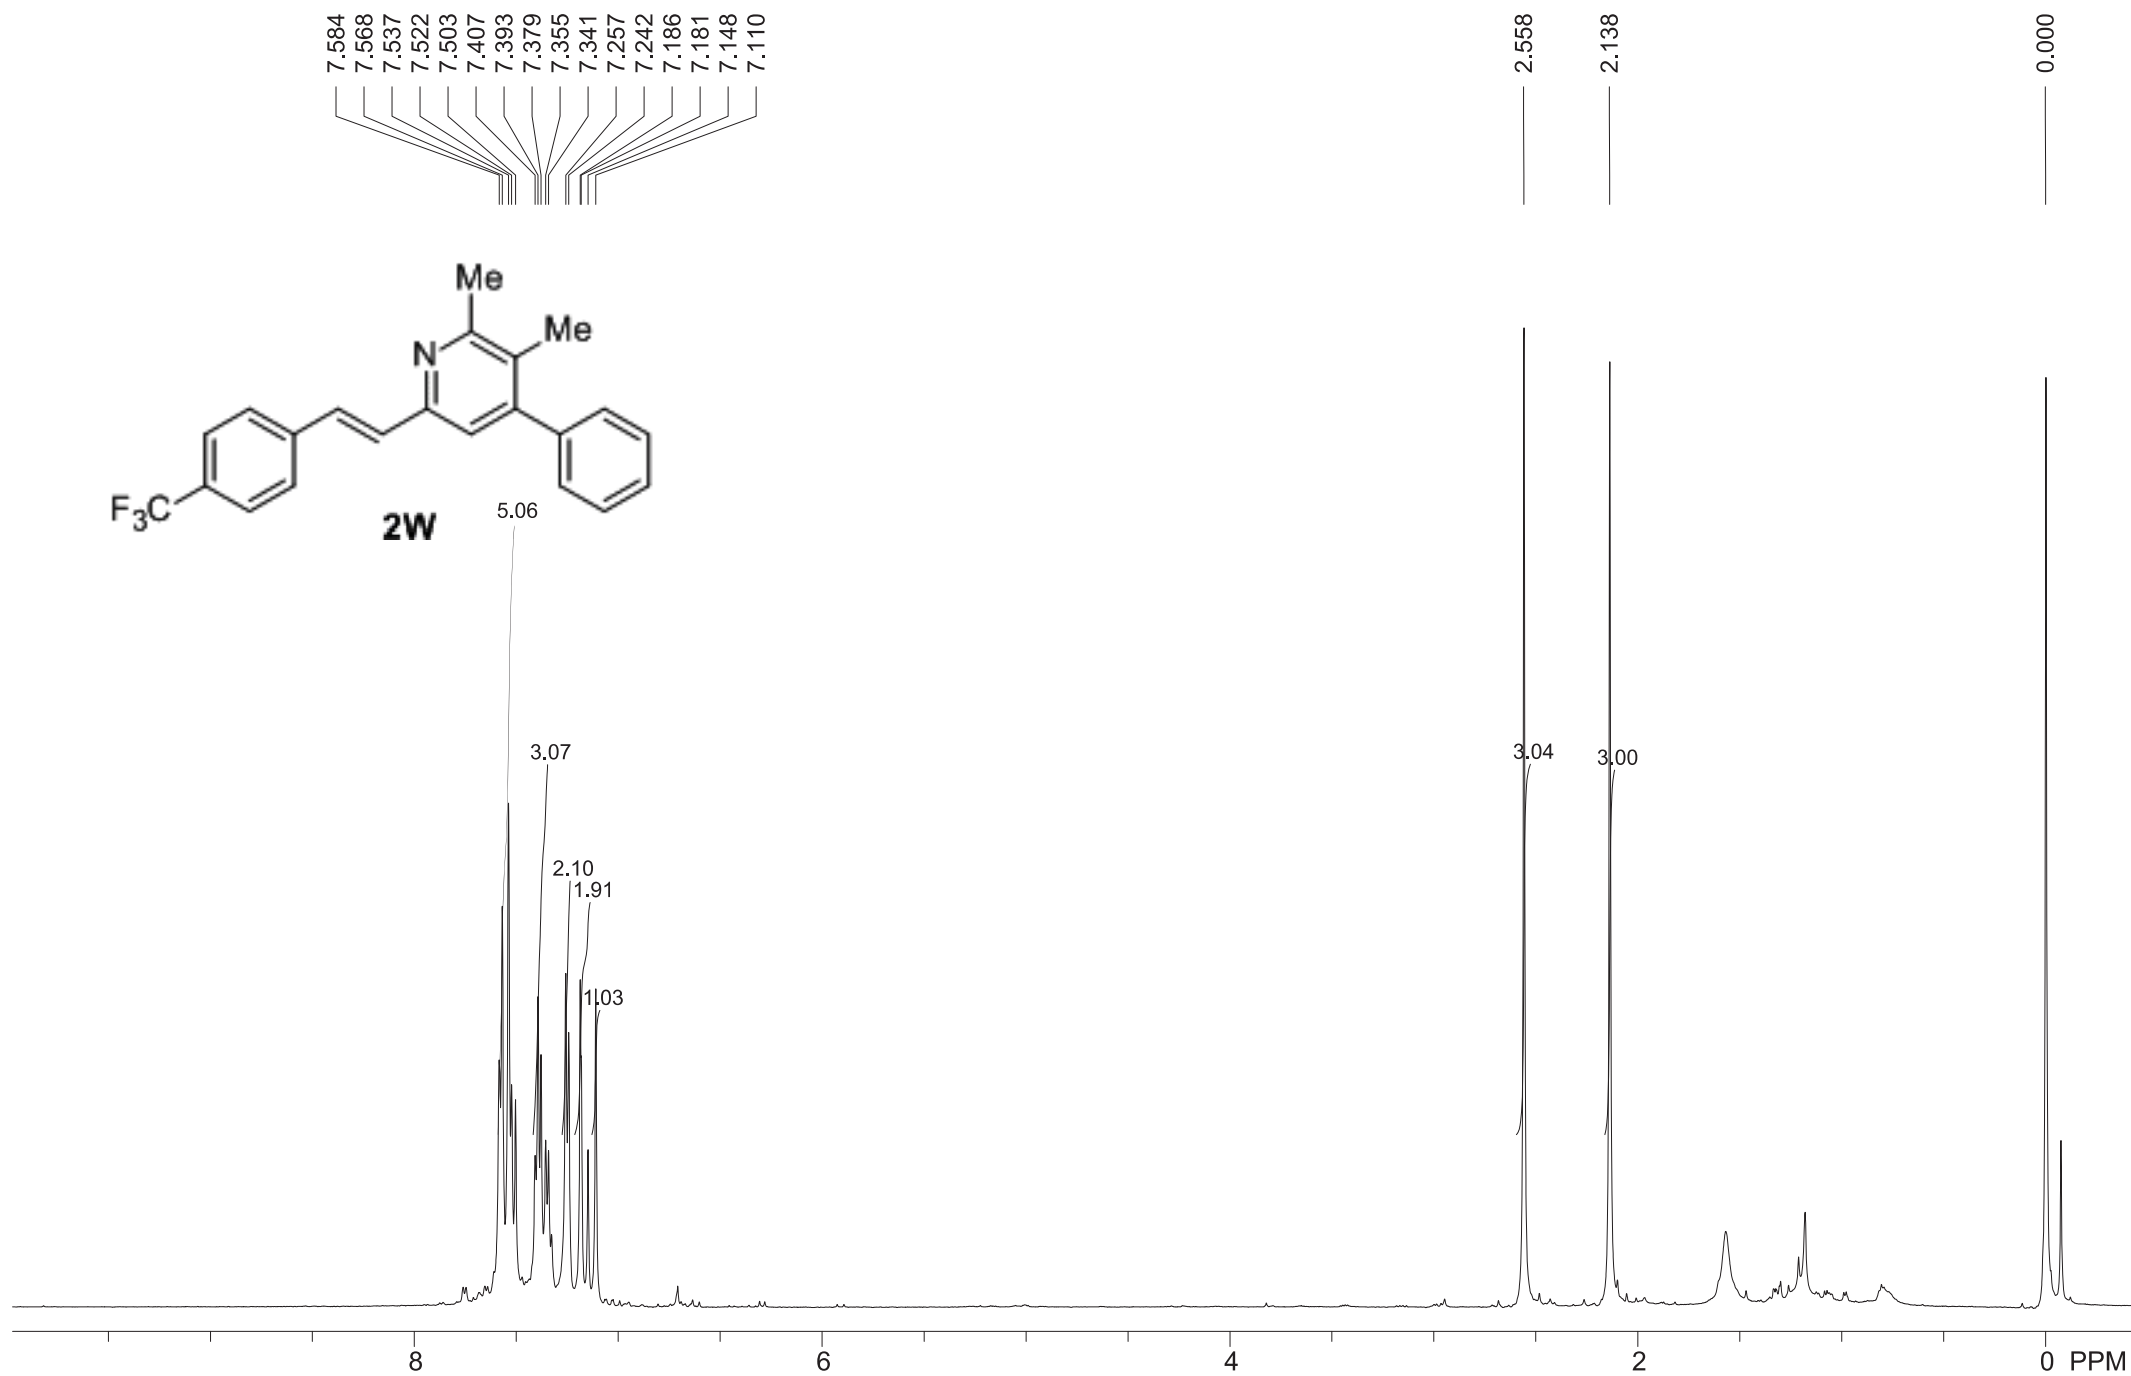

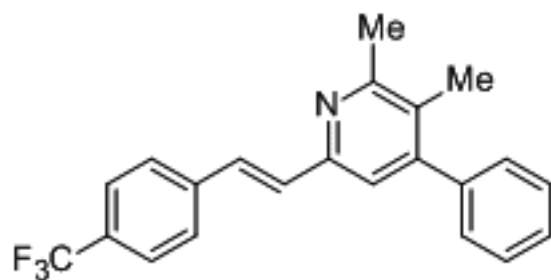

**2W**

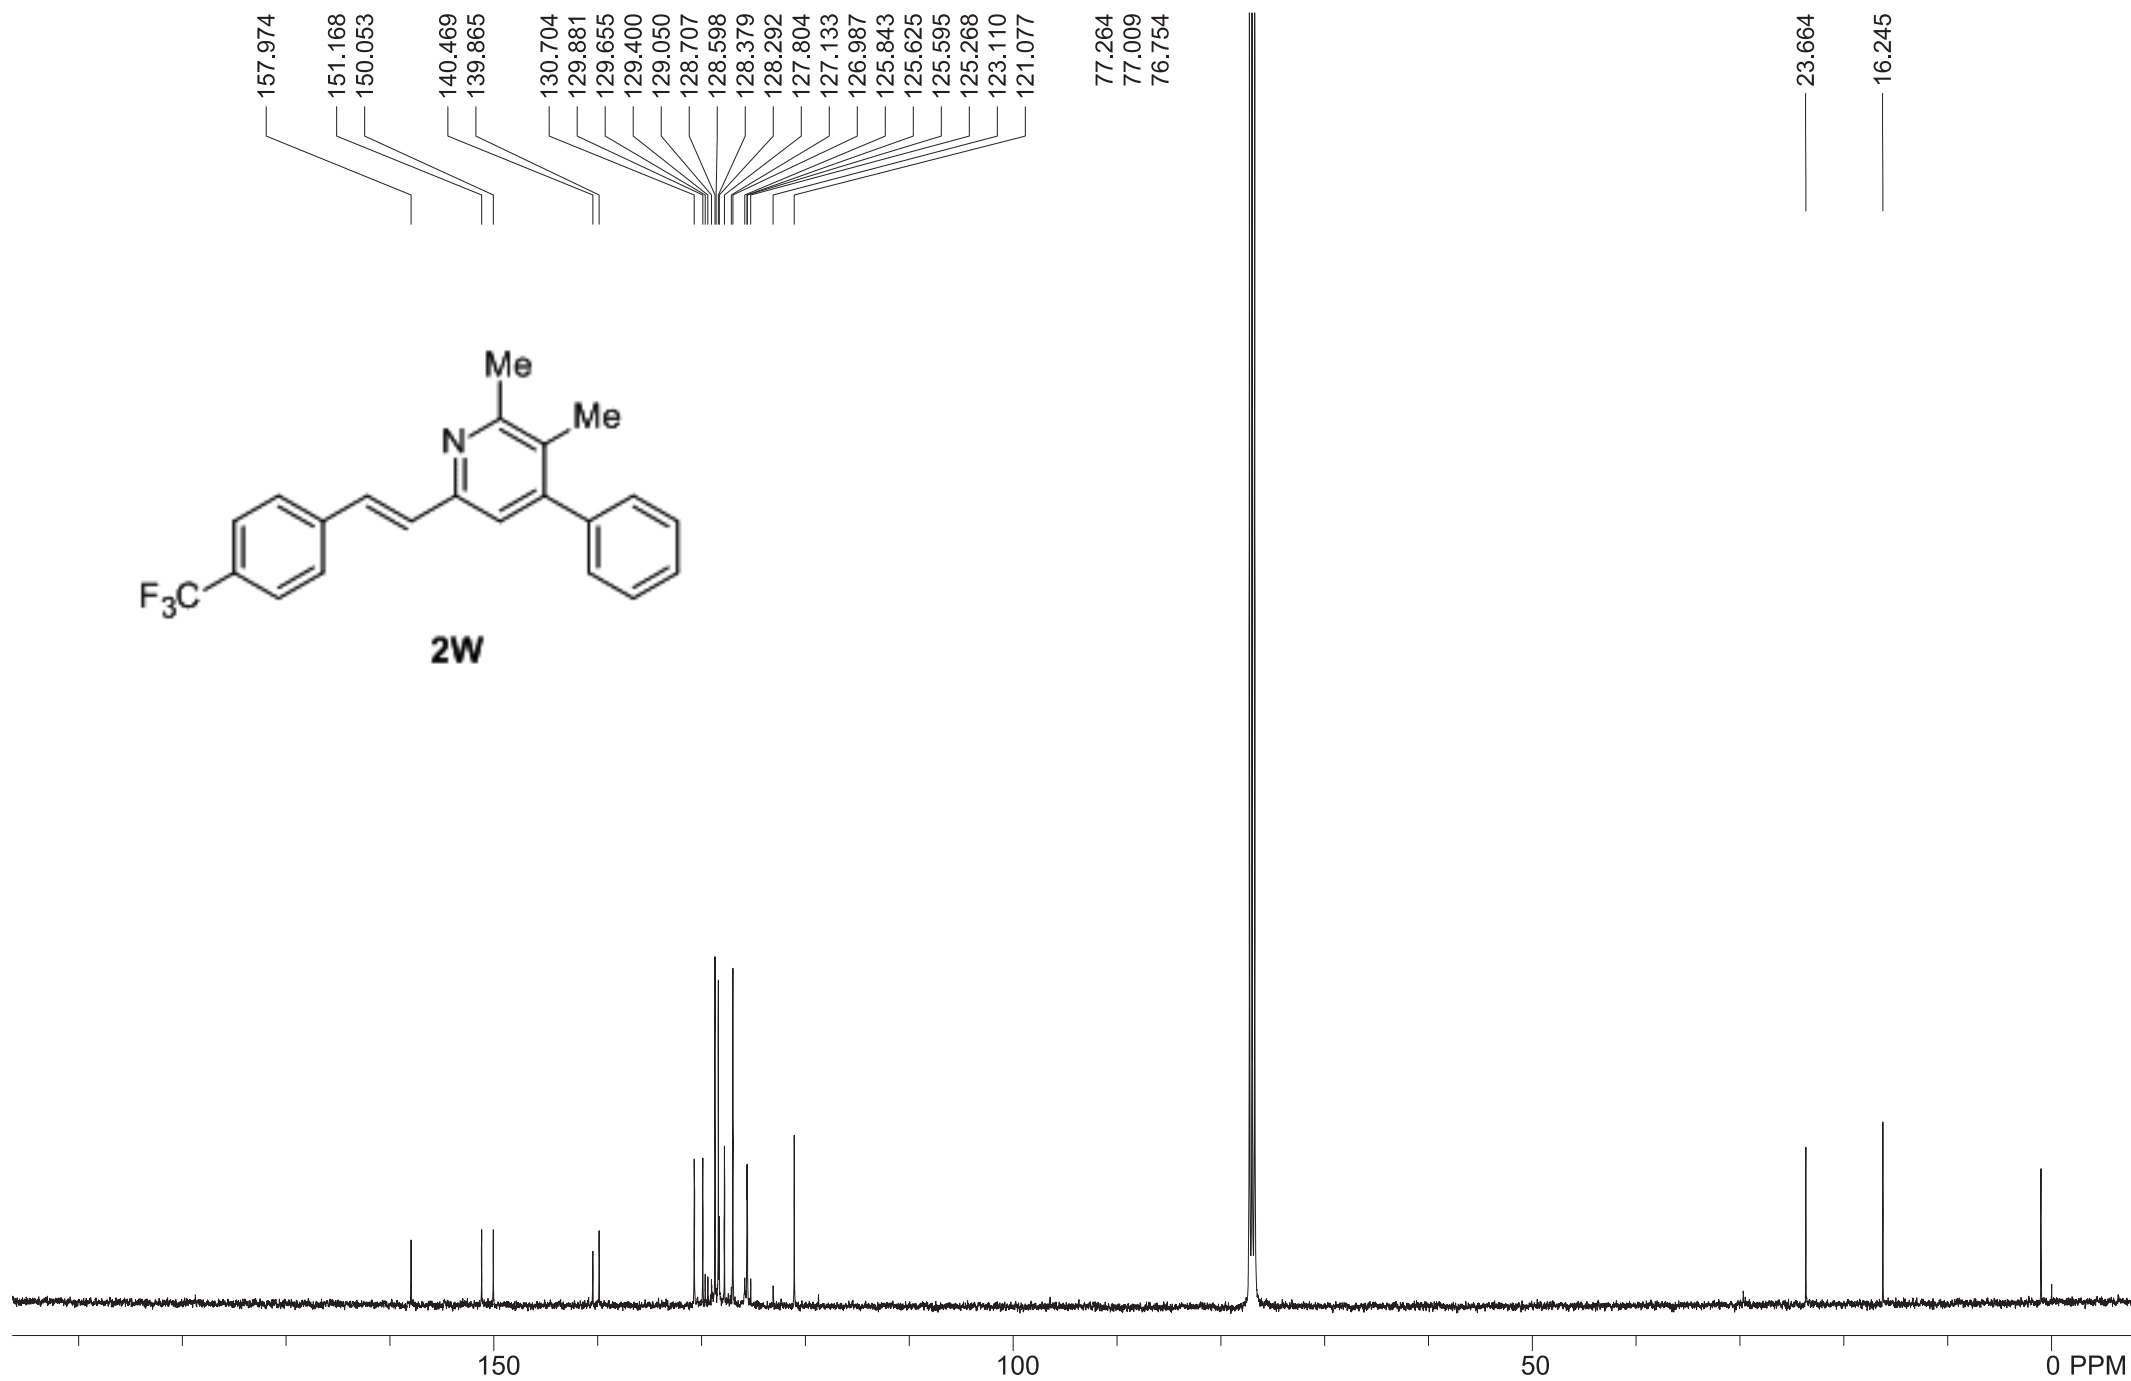

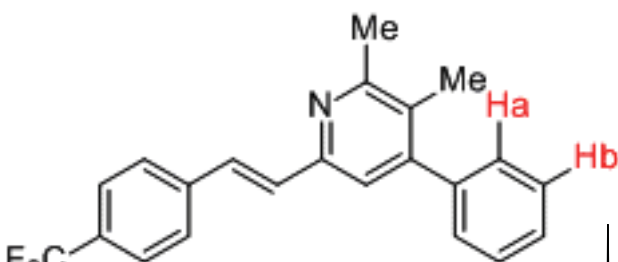

2W  
COSY

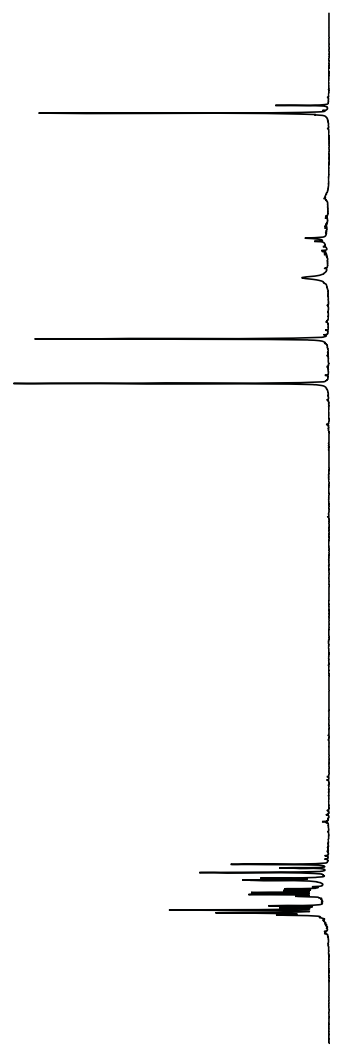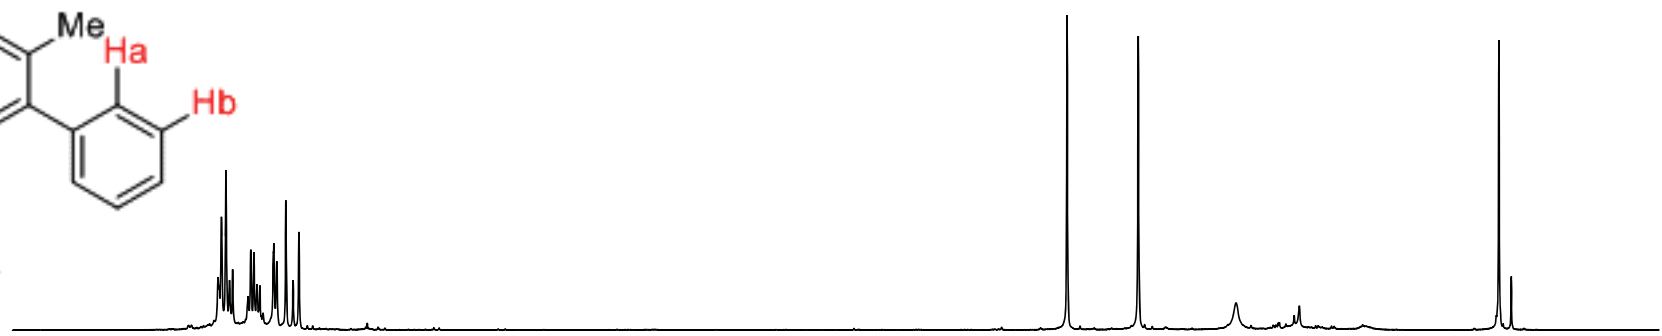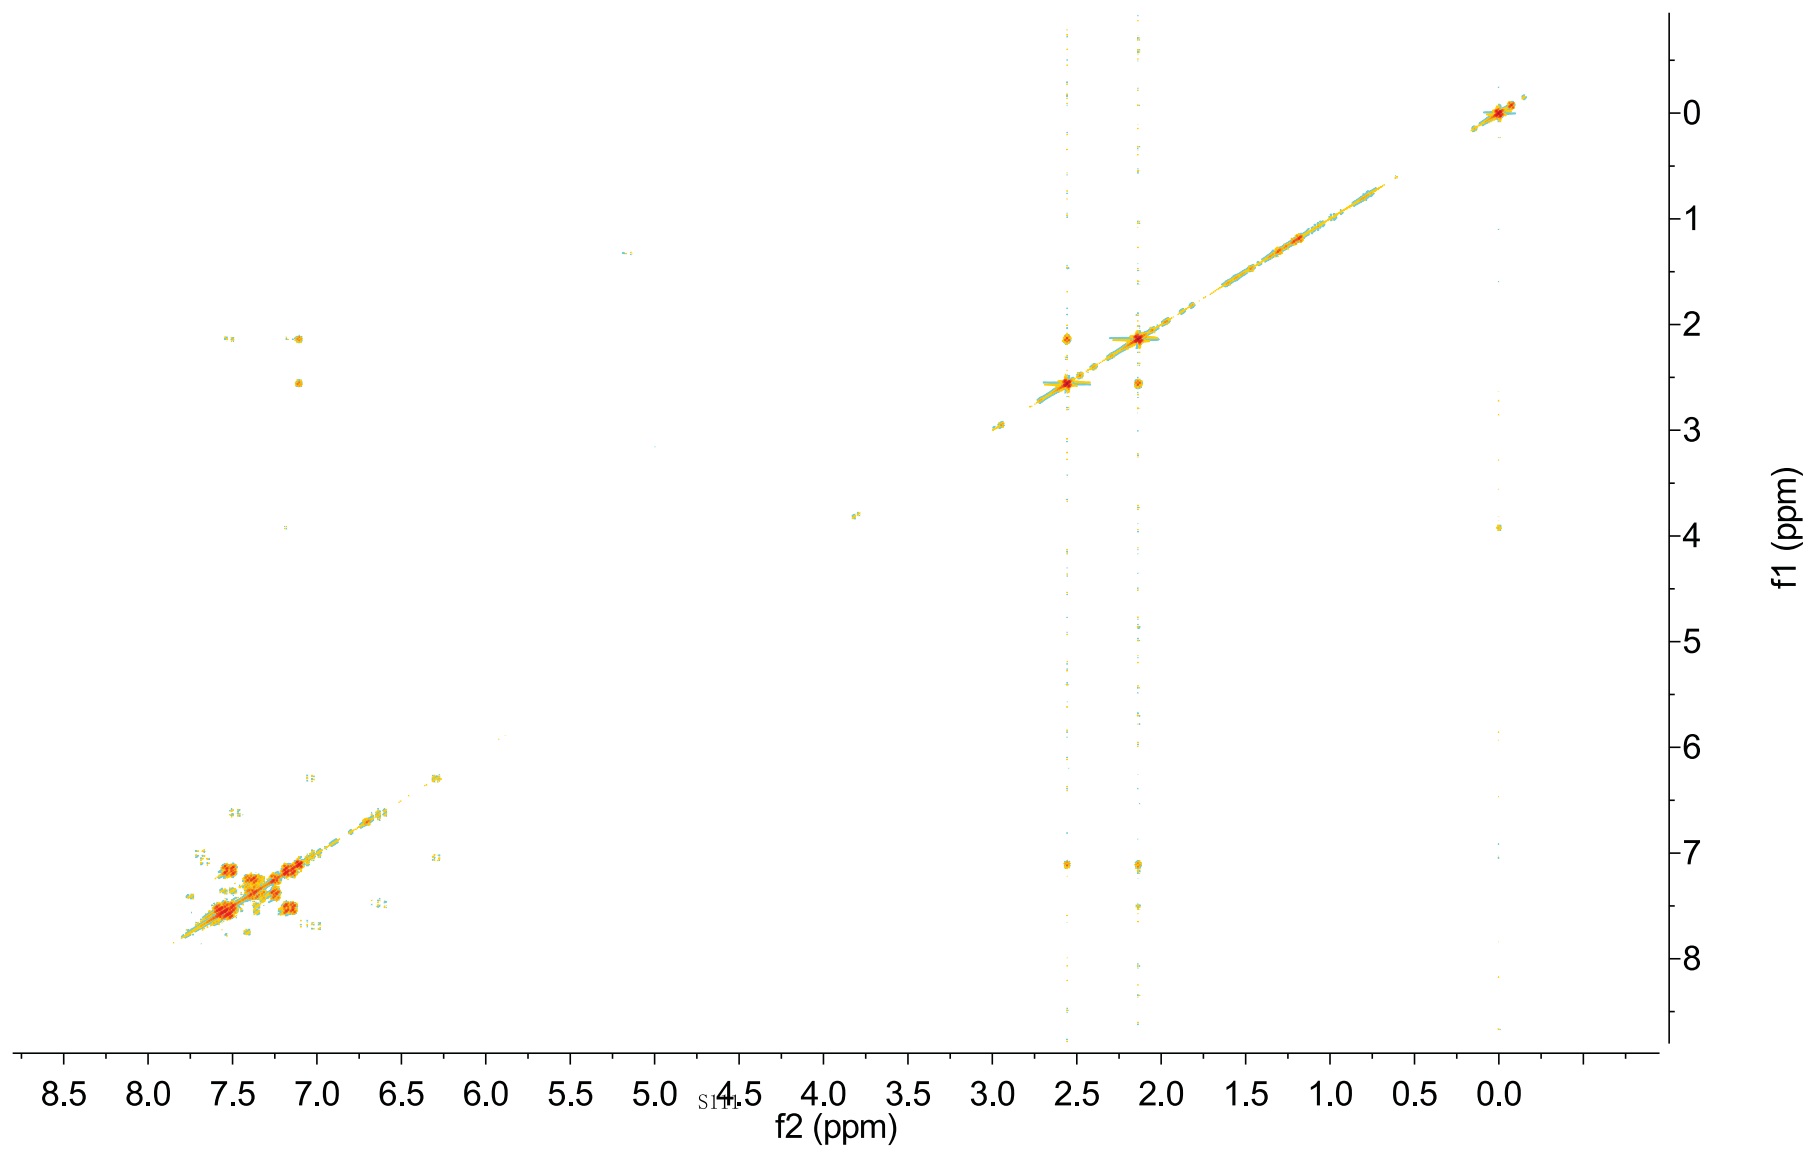

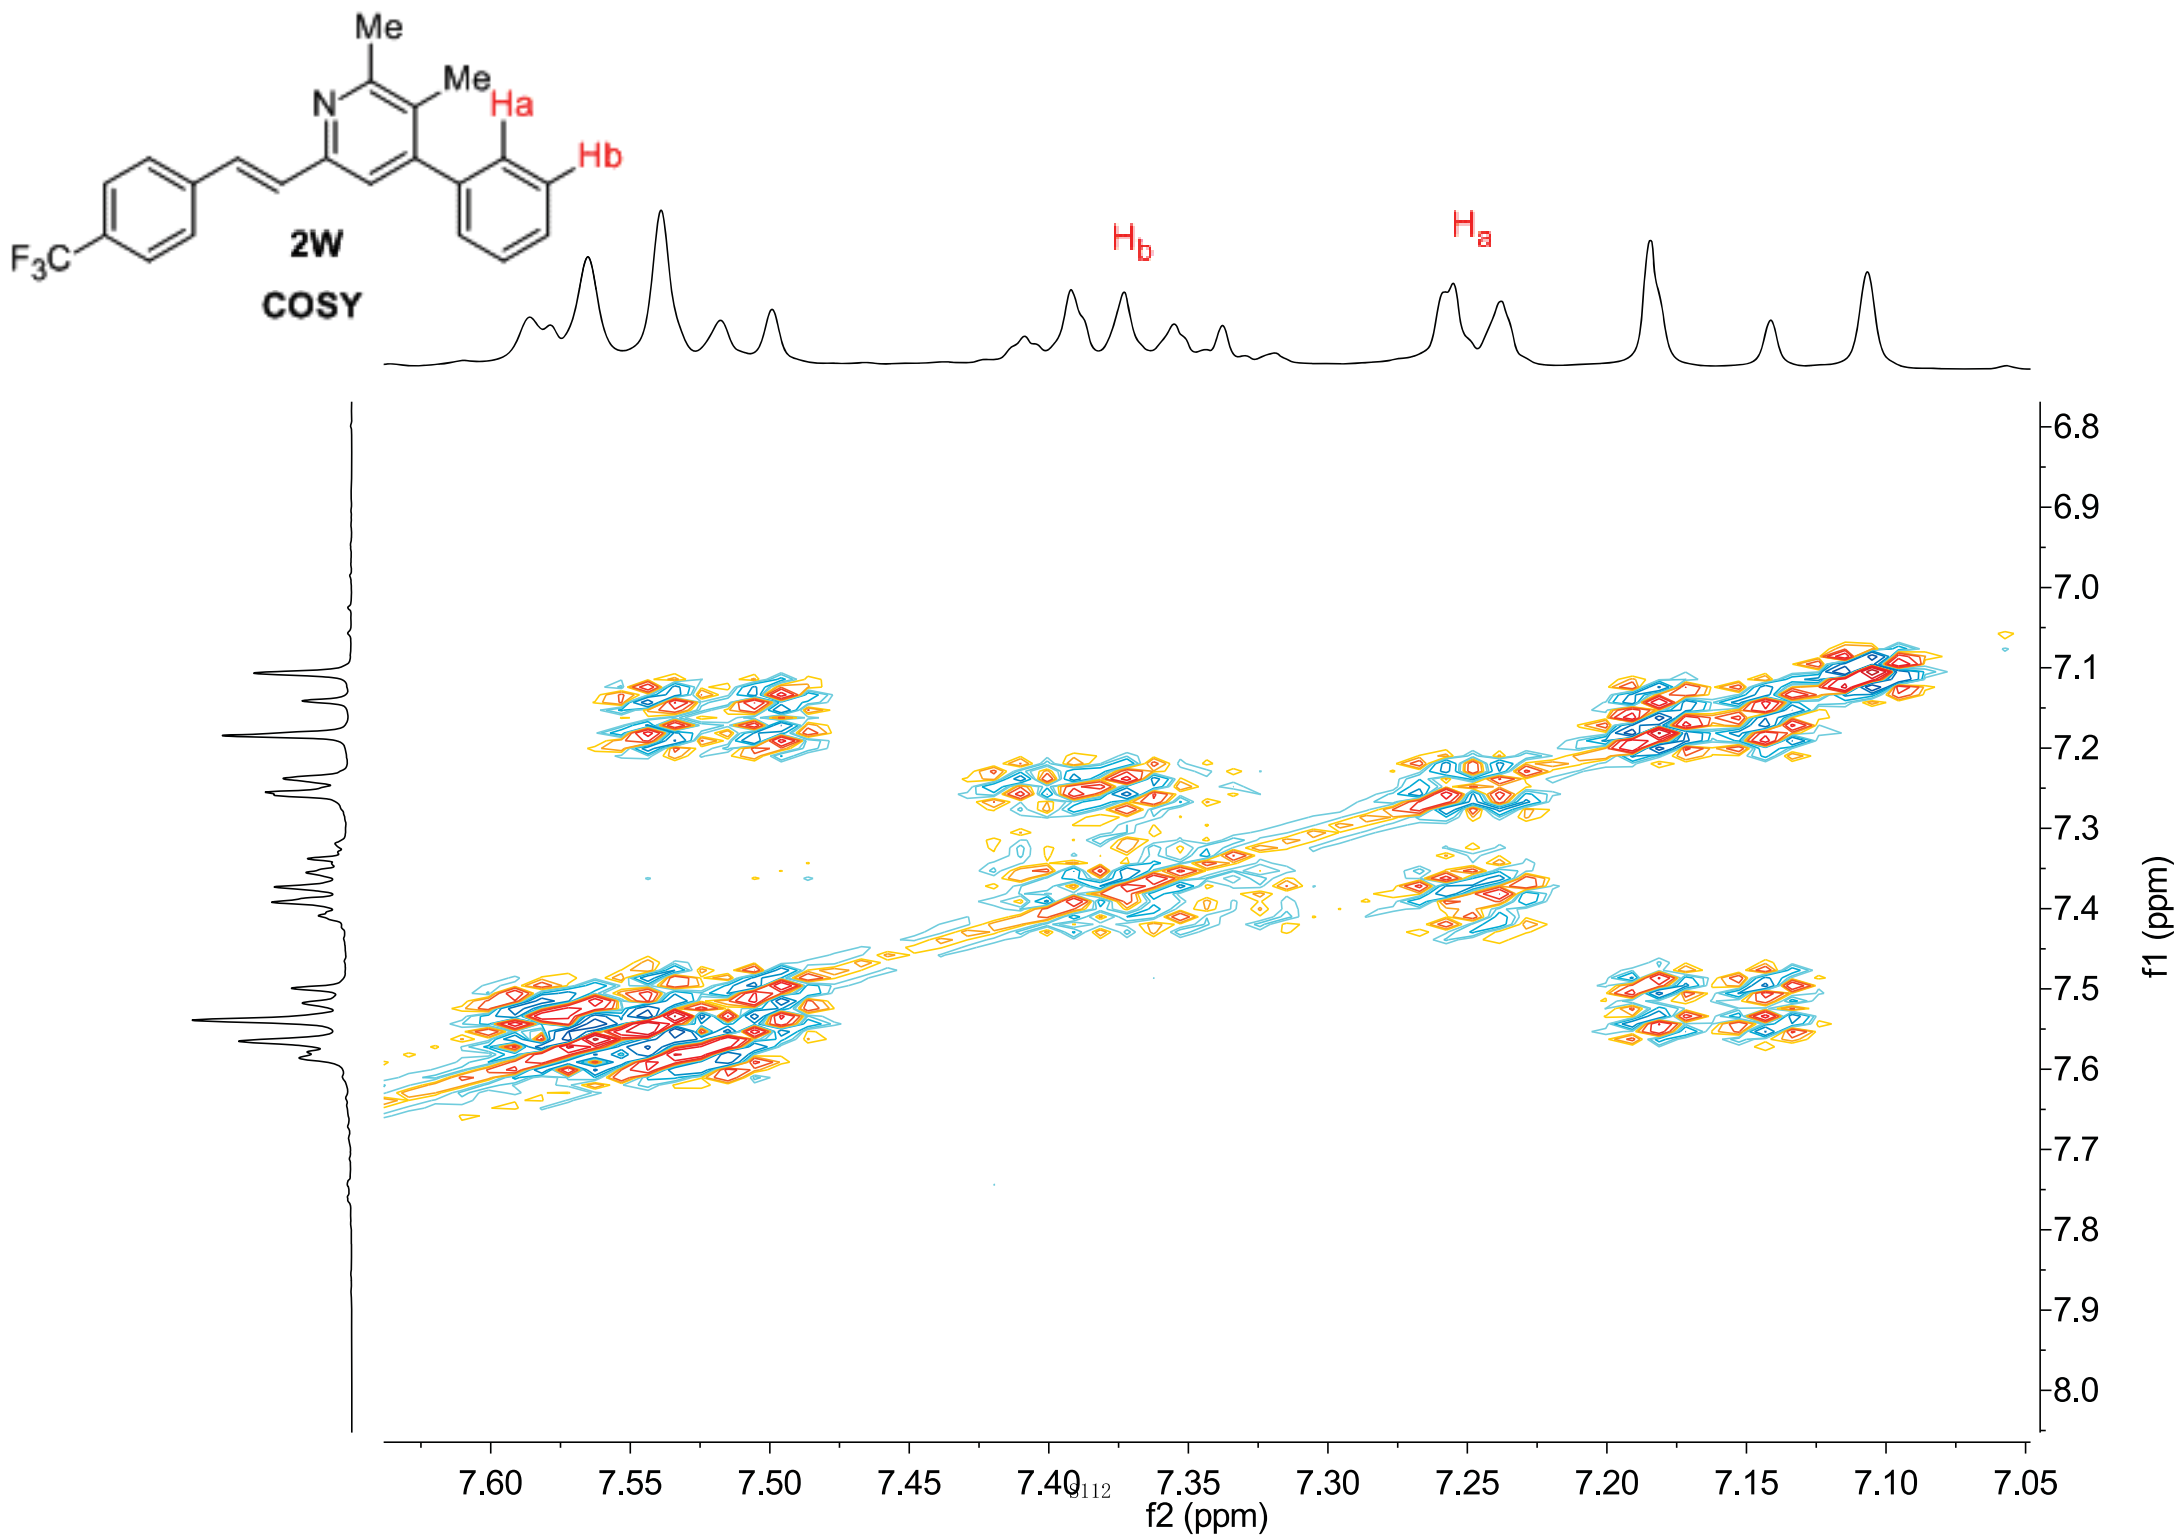

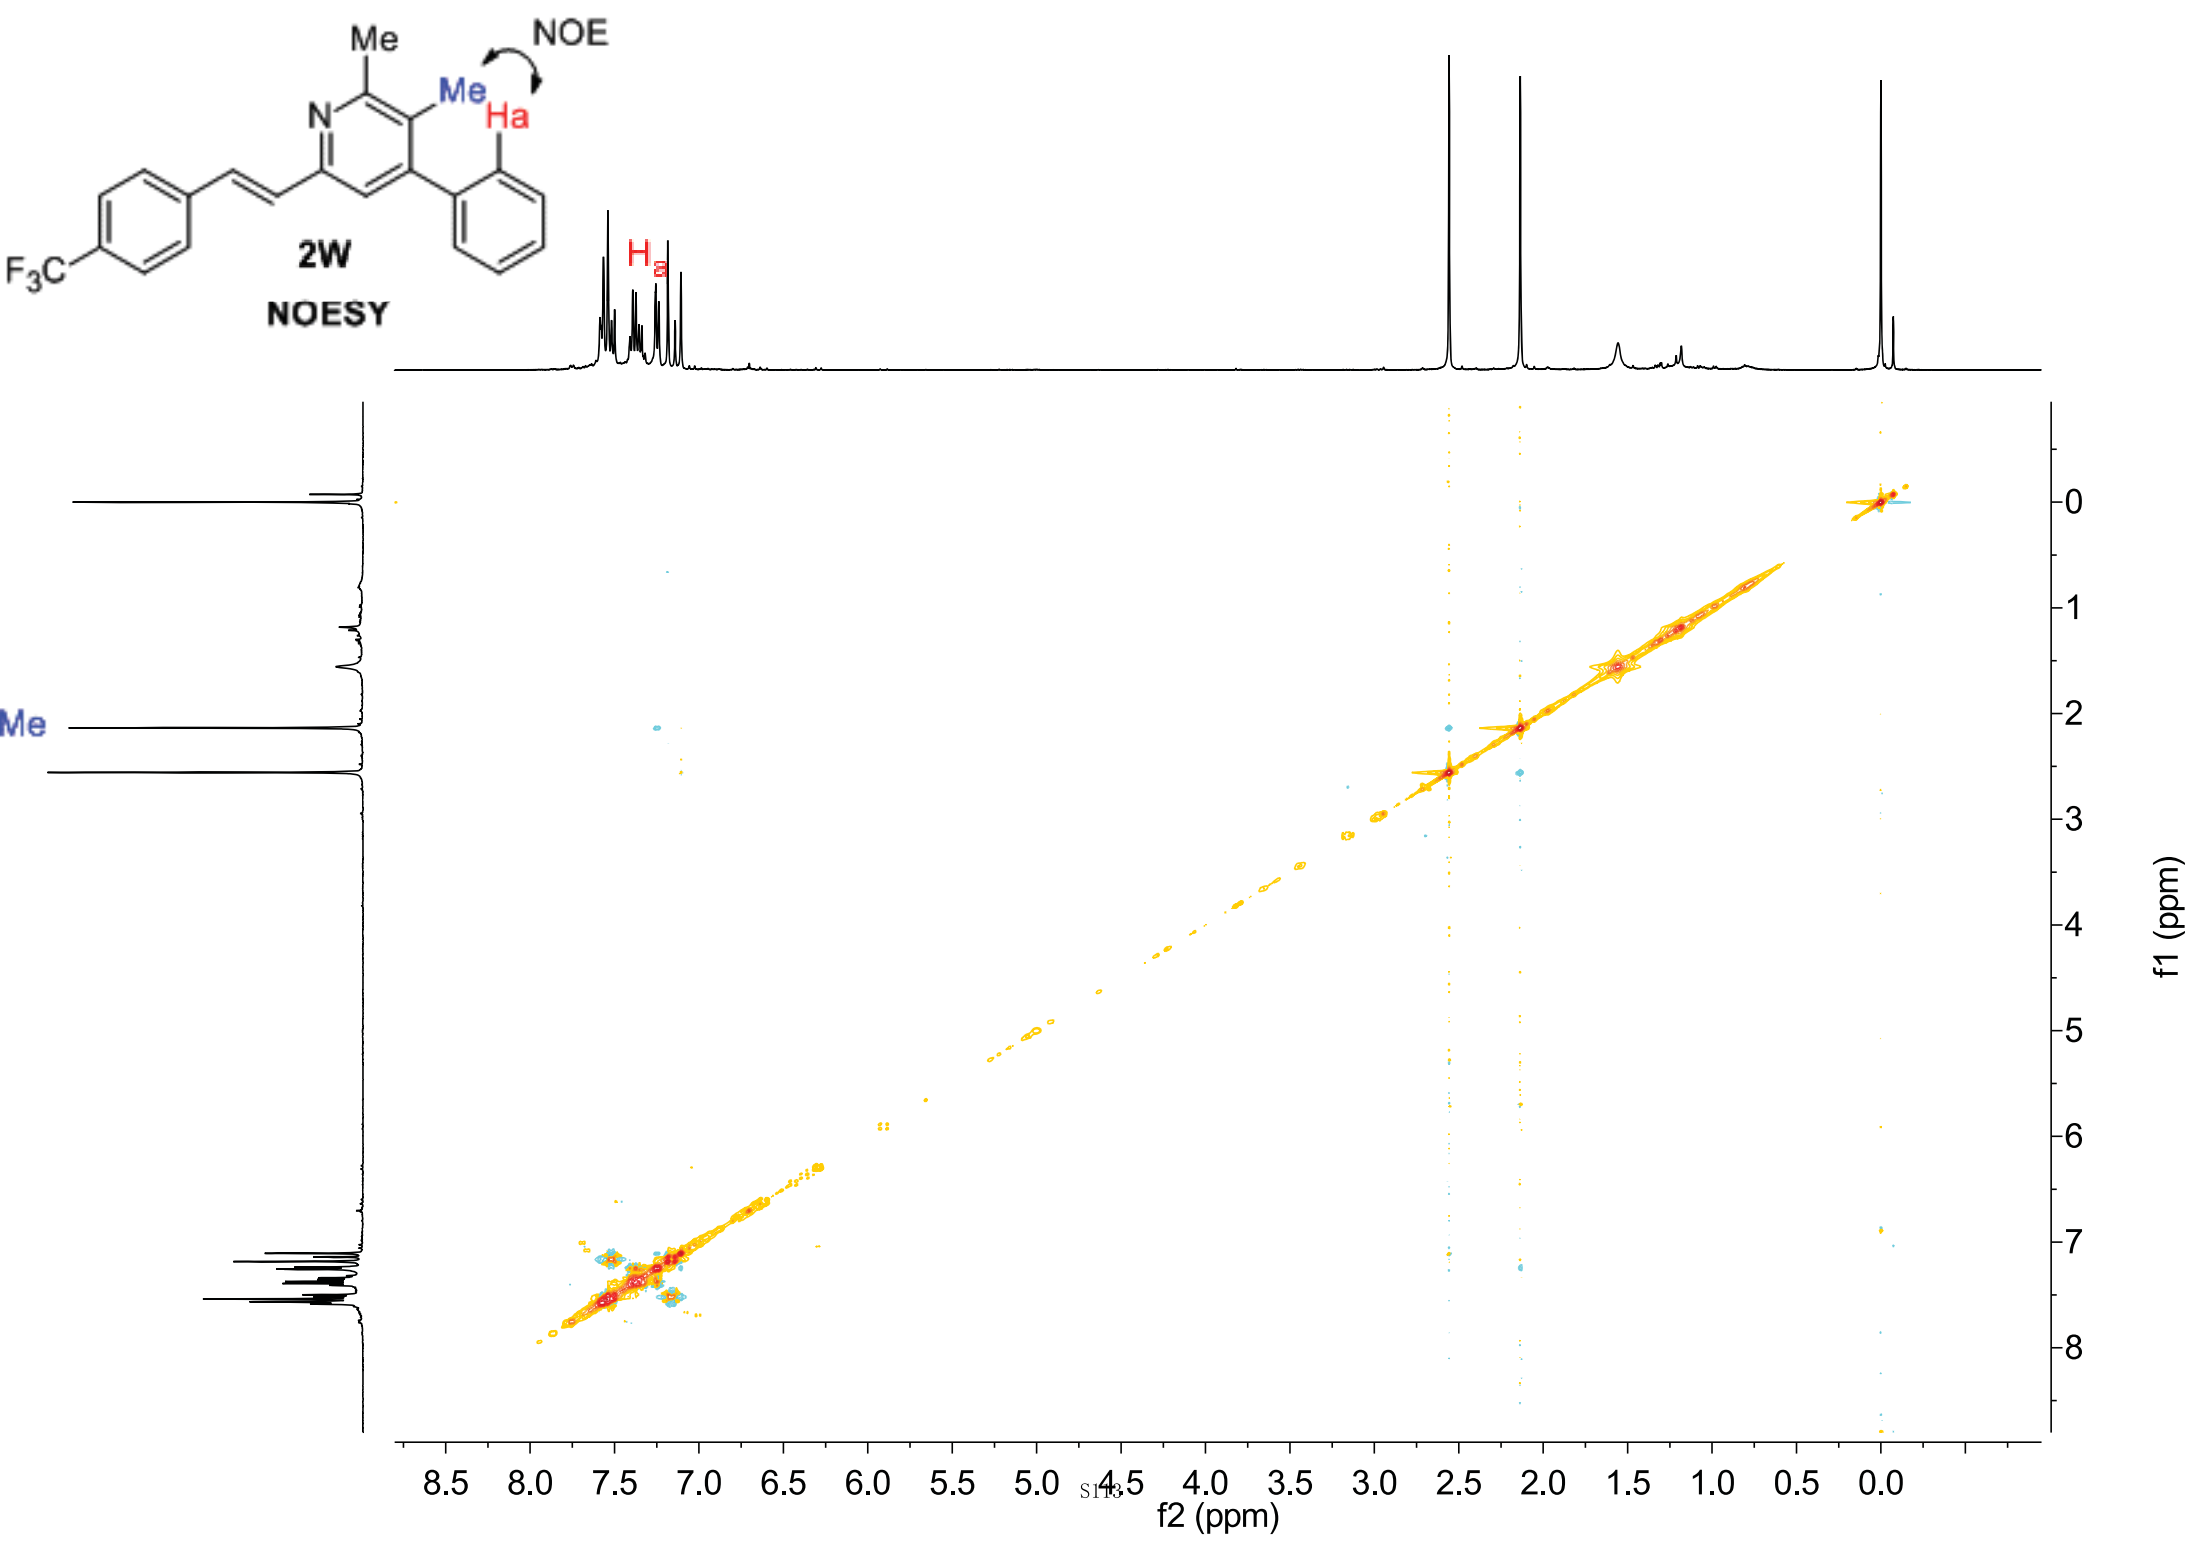

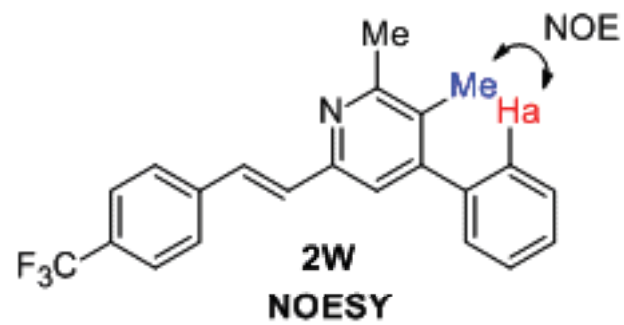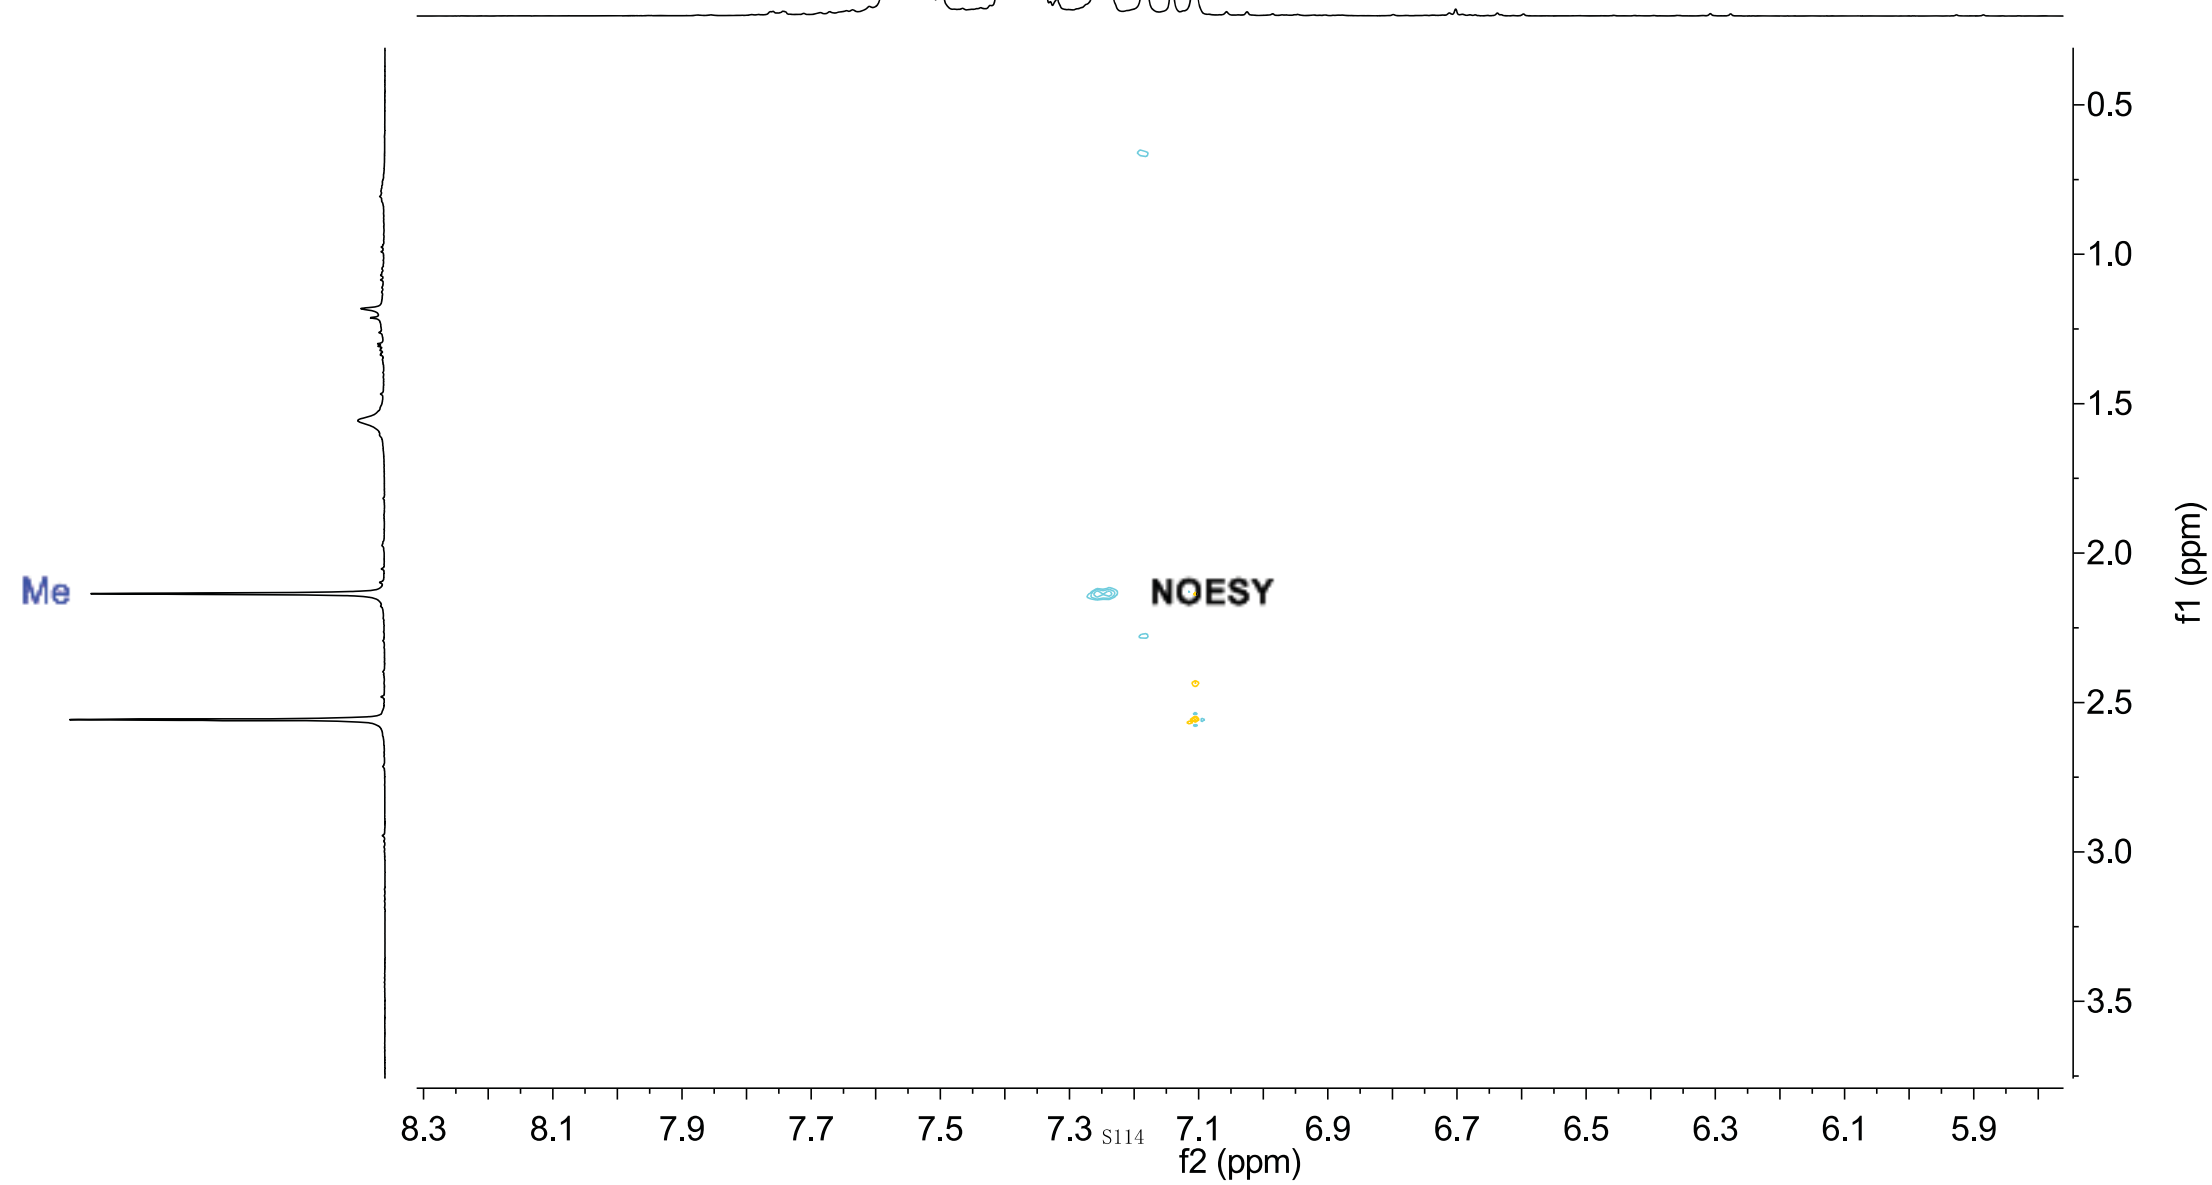

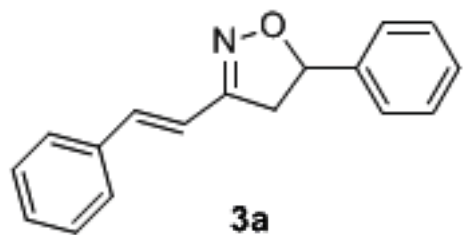

7.345  
7.327  
7.262  
7.253  
7.221  
7.207  
7.188  
7.032  
6.991  
6.627  
6.586  
5.572  
5.551  
5.546  
5.525

3.521  
3.493  
3.480  
3.452  
3.091  
3.070  
3.050  
3.029

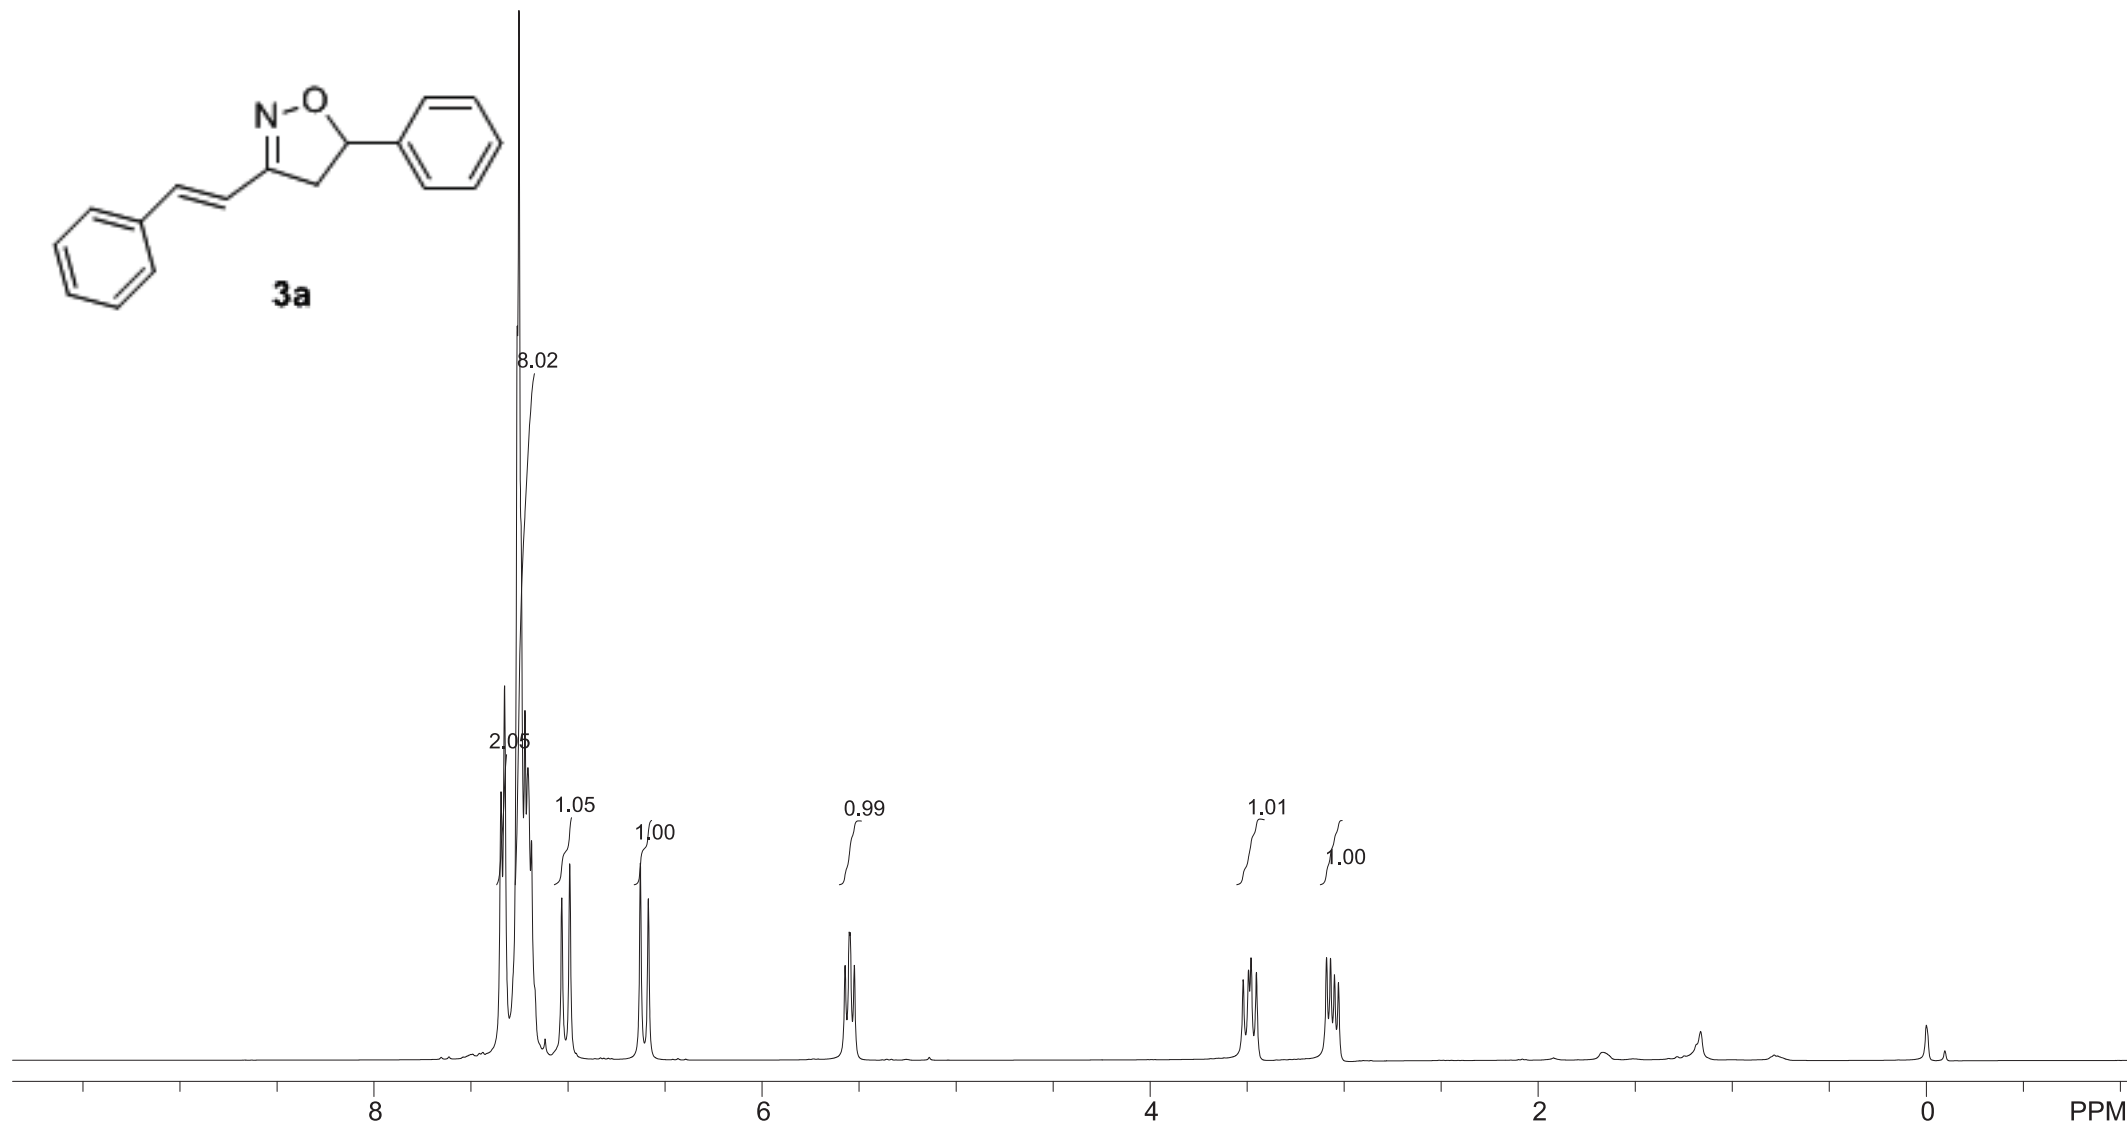

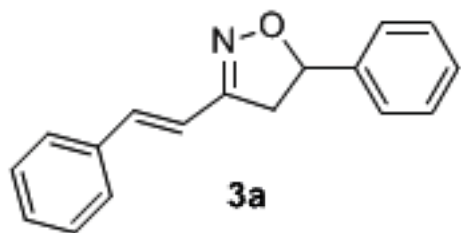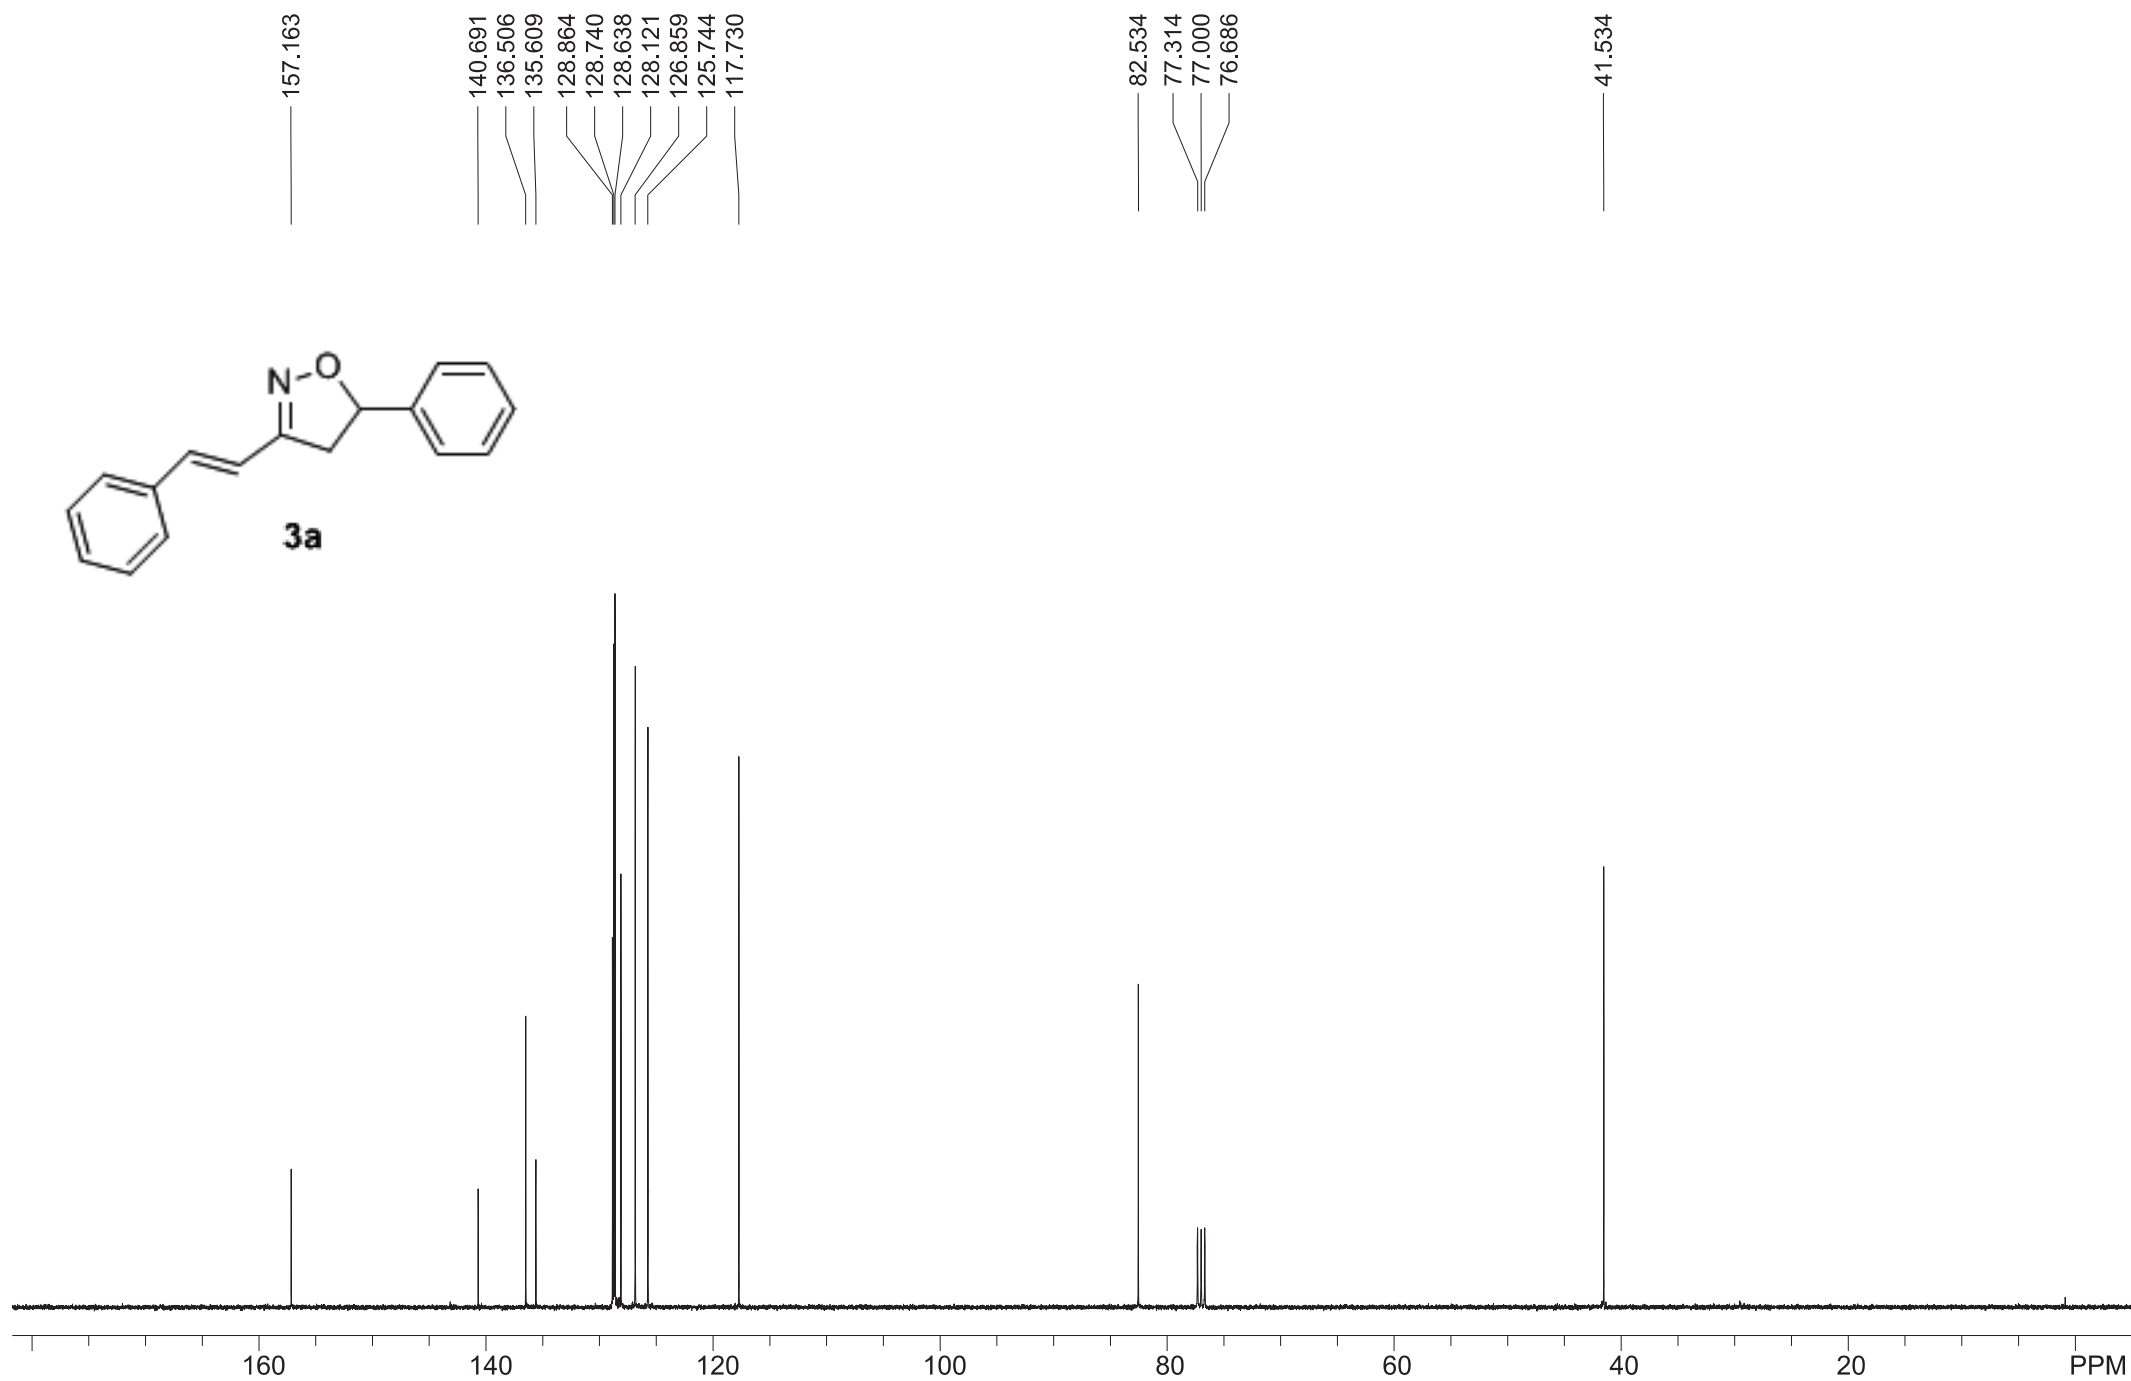



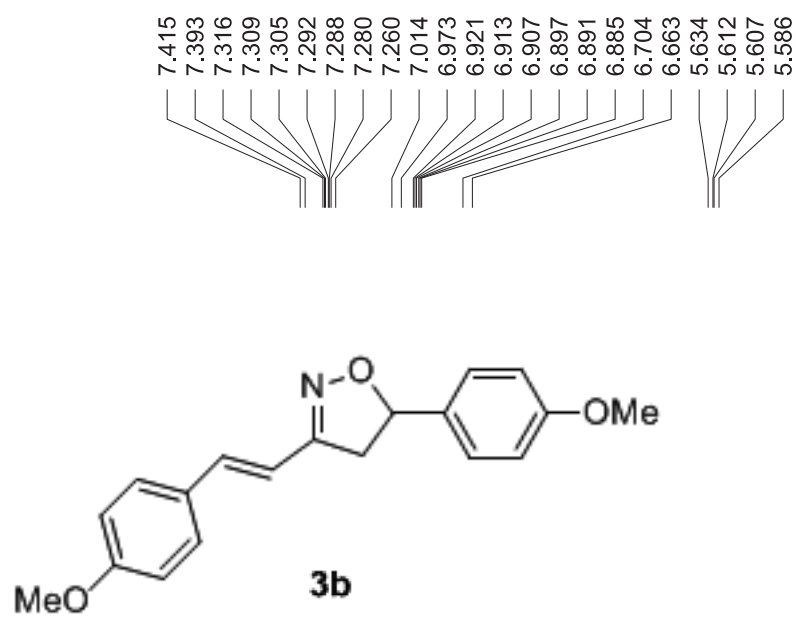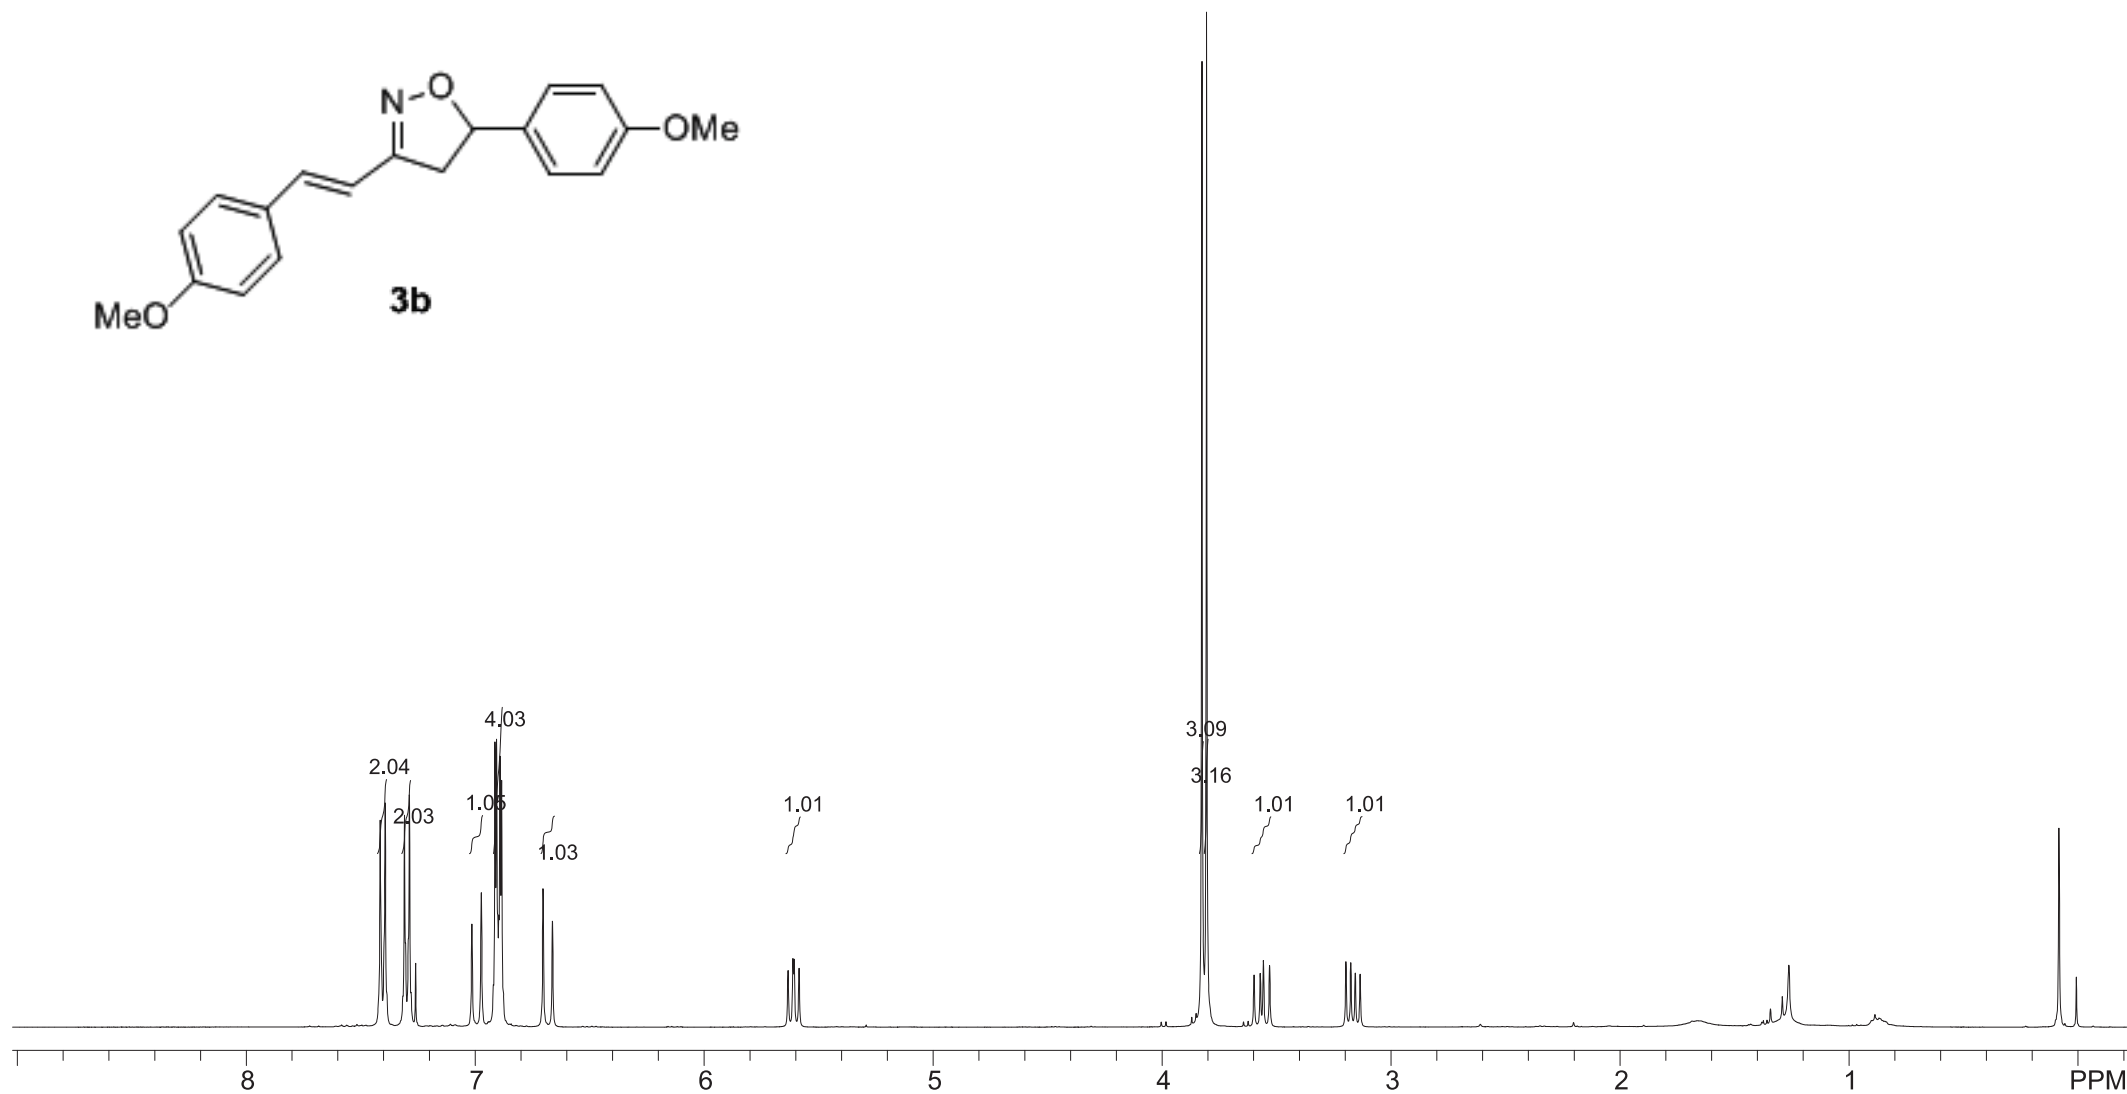

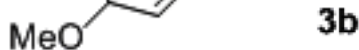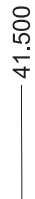

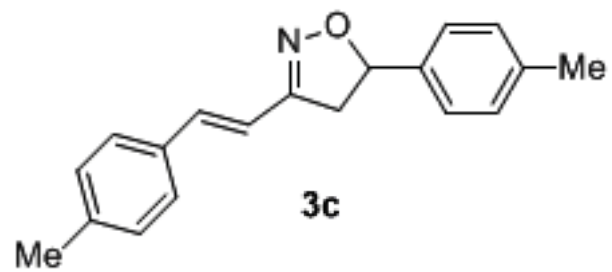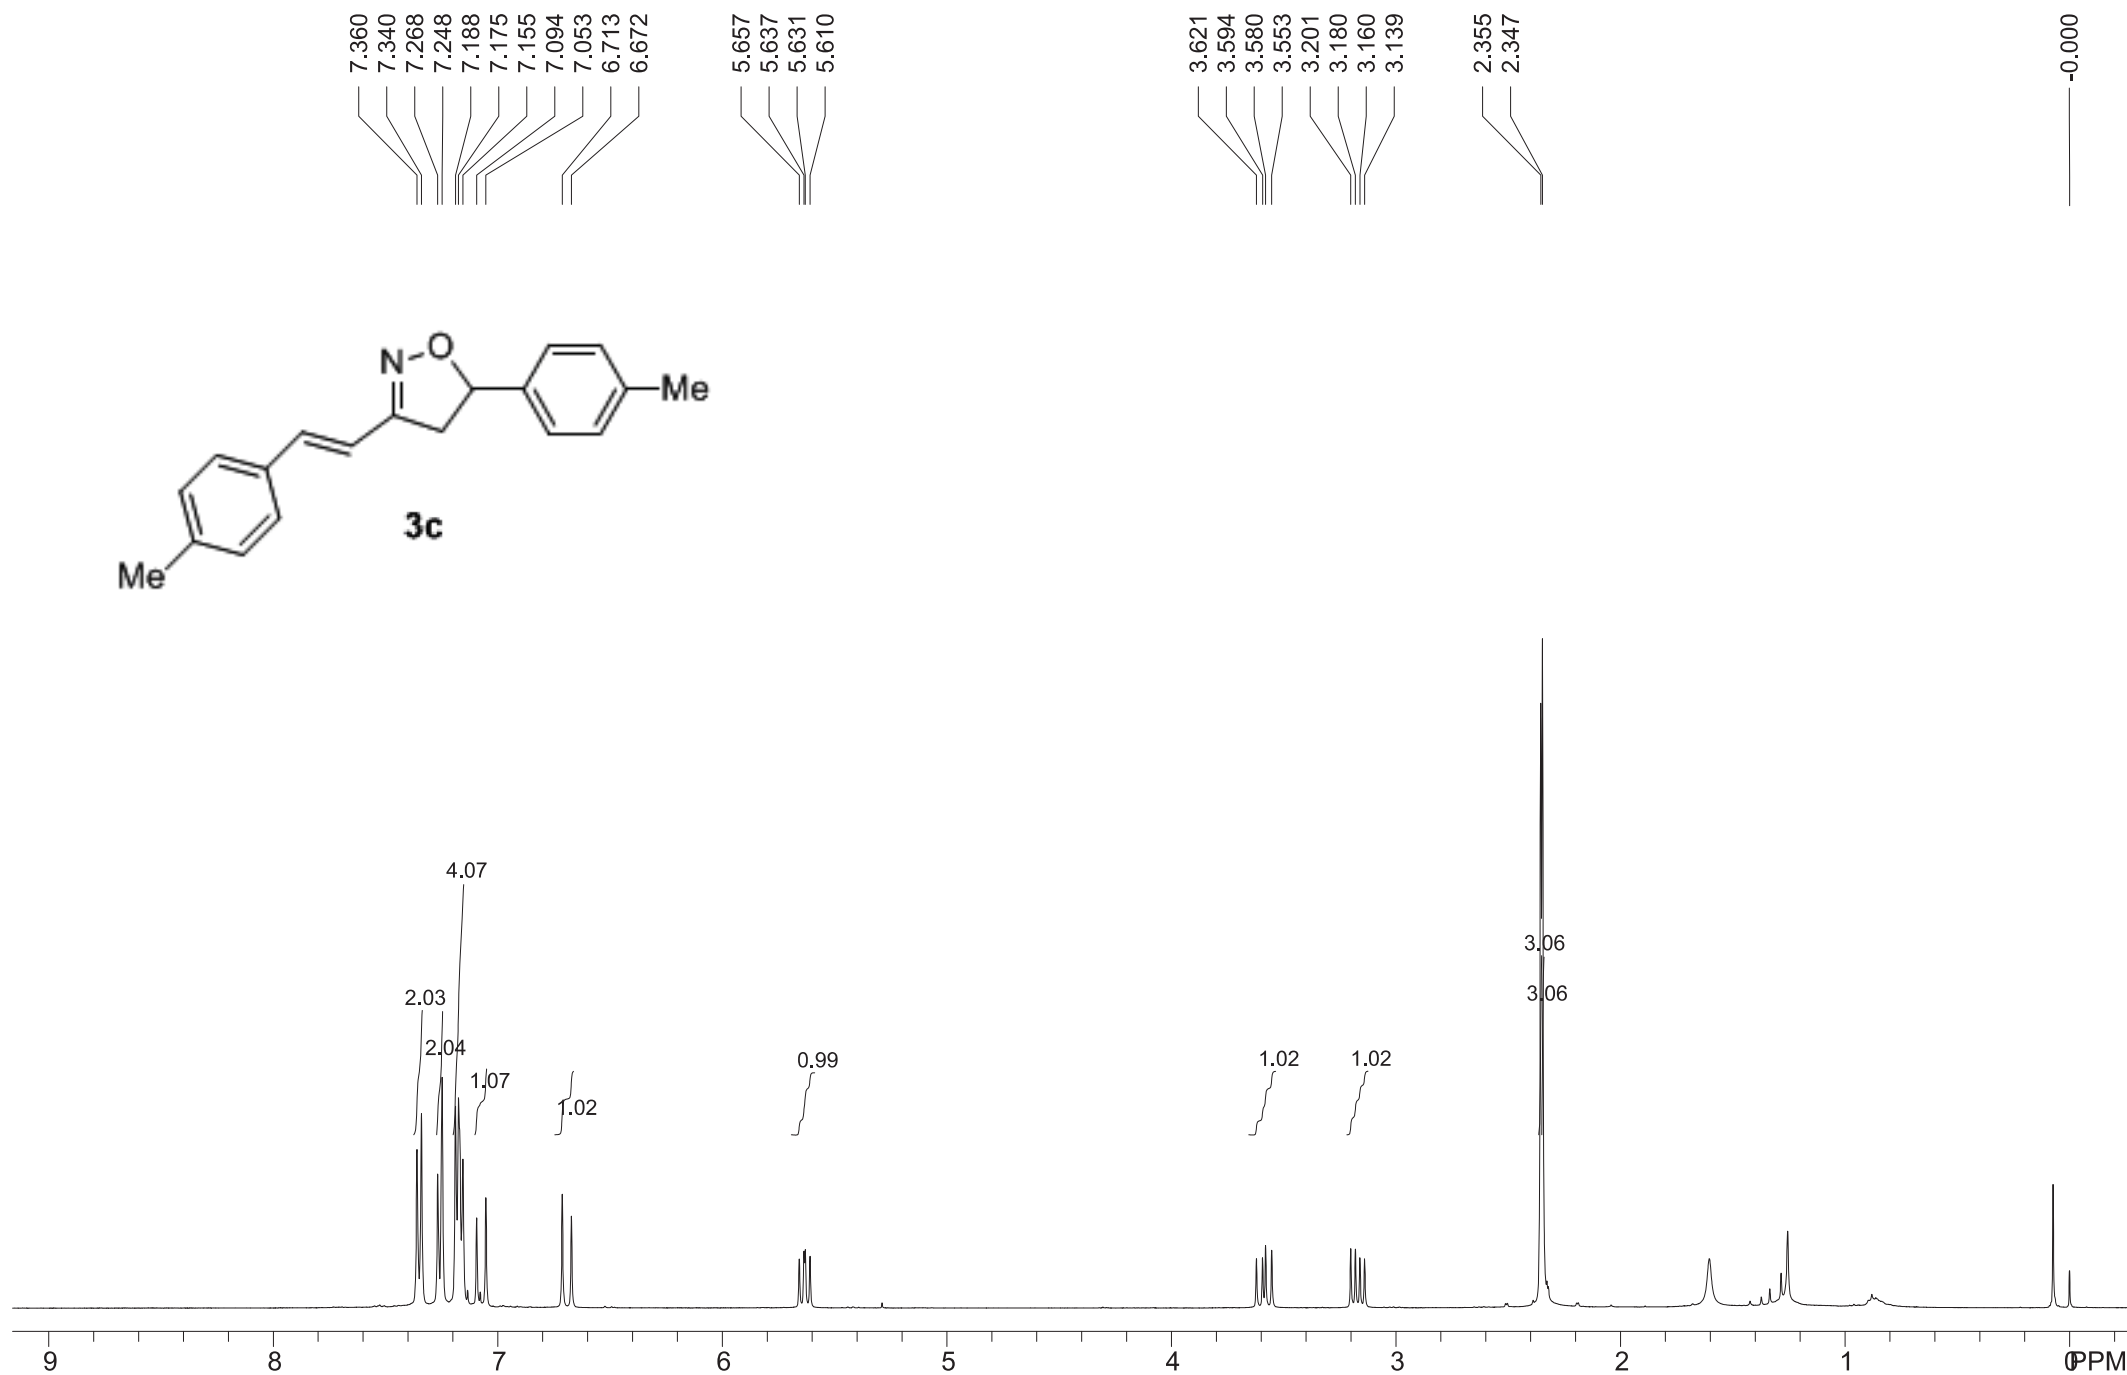

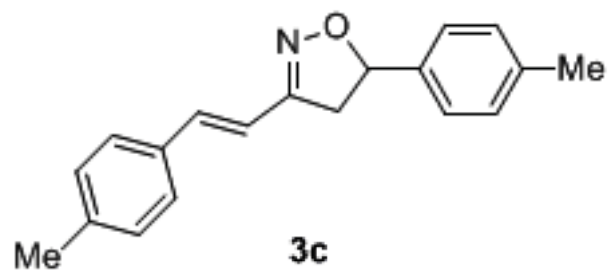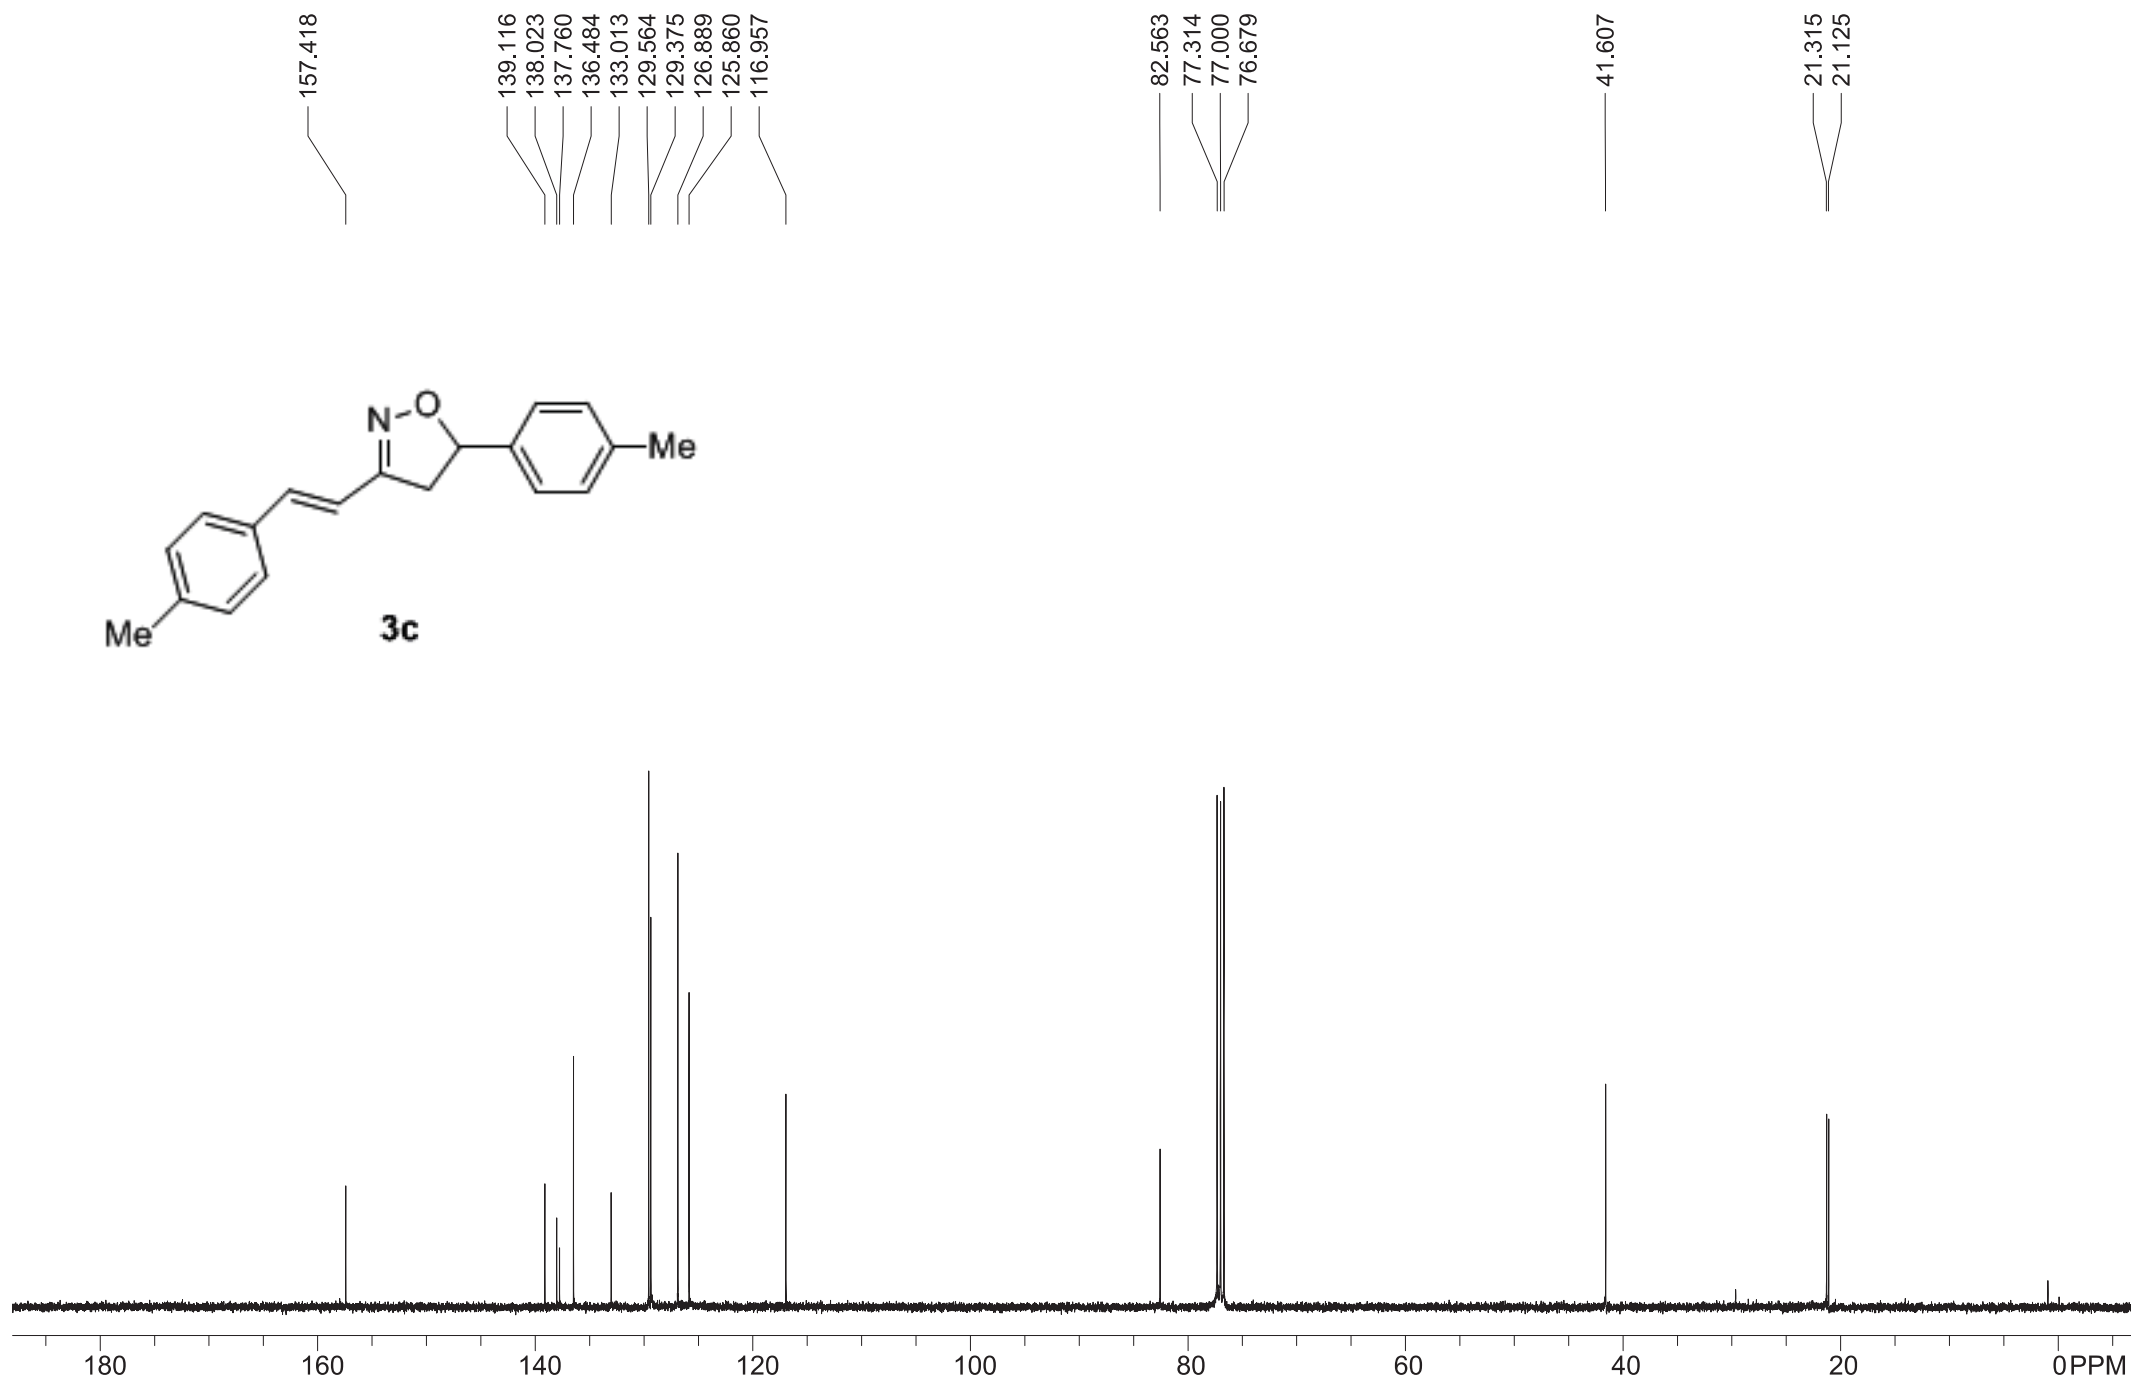

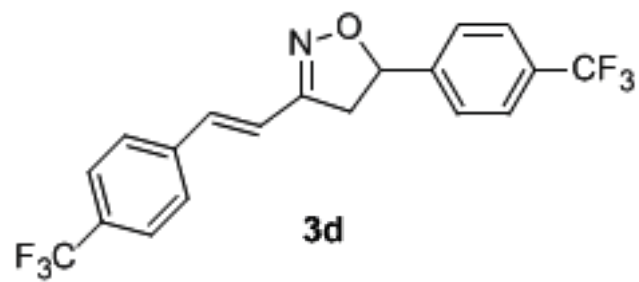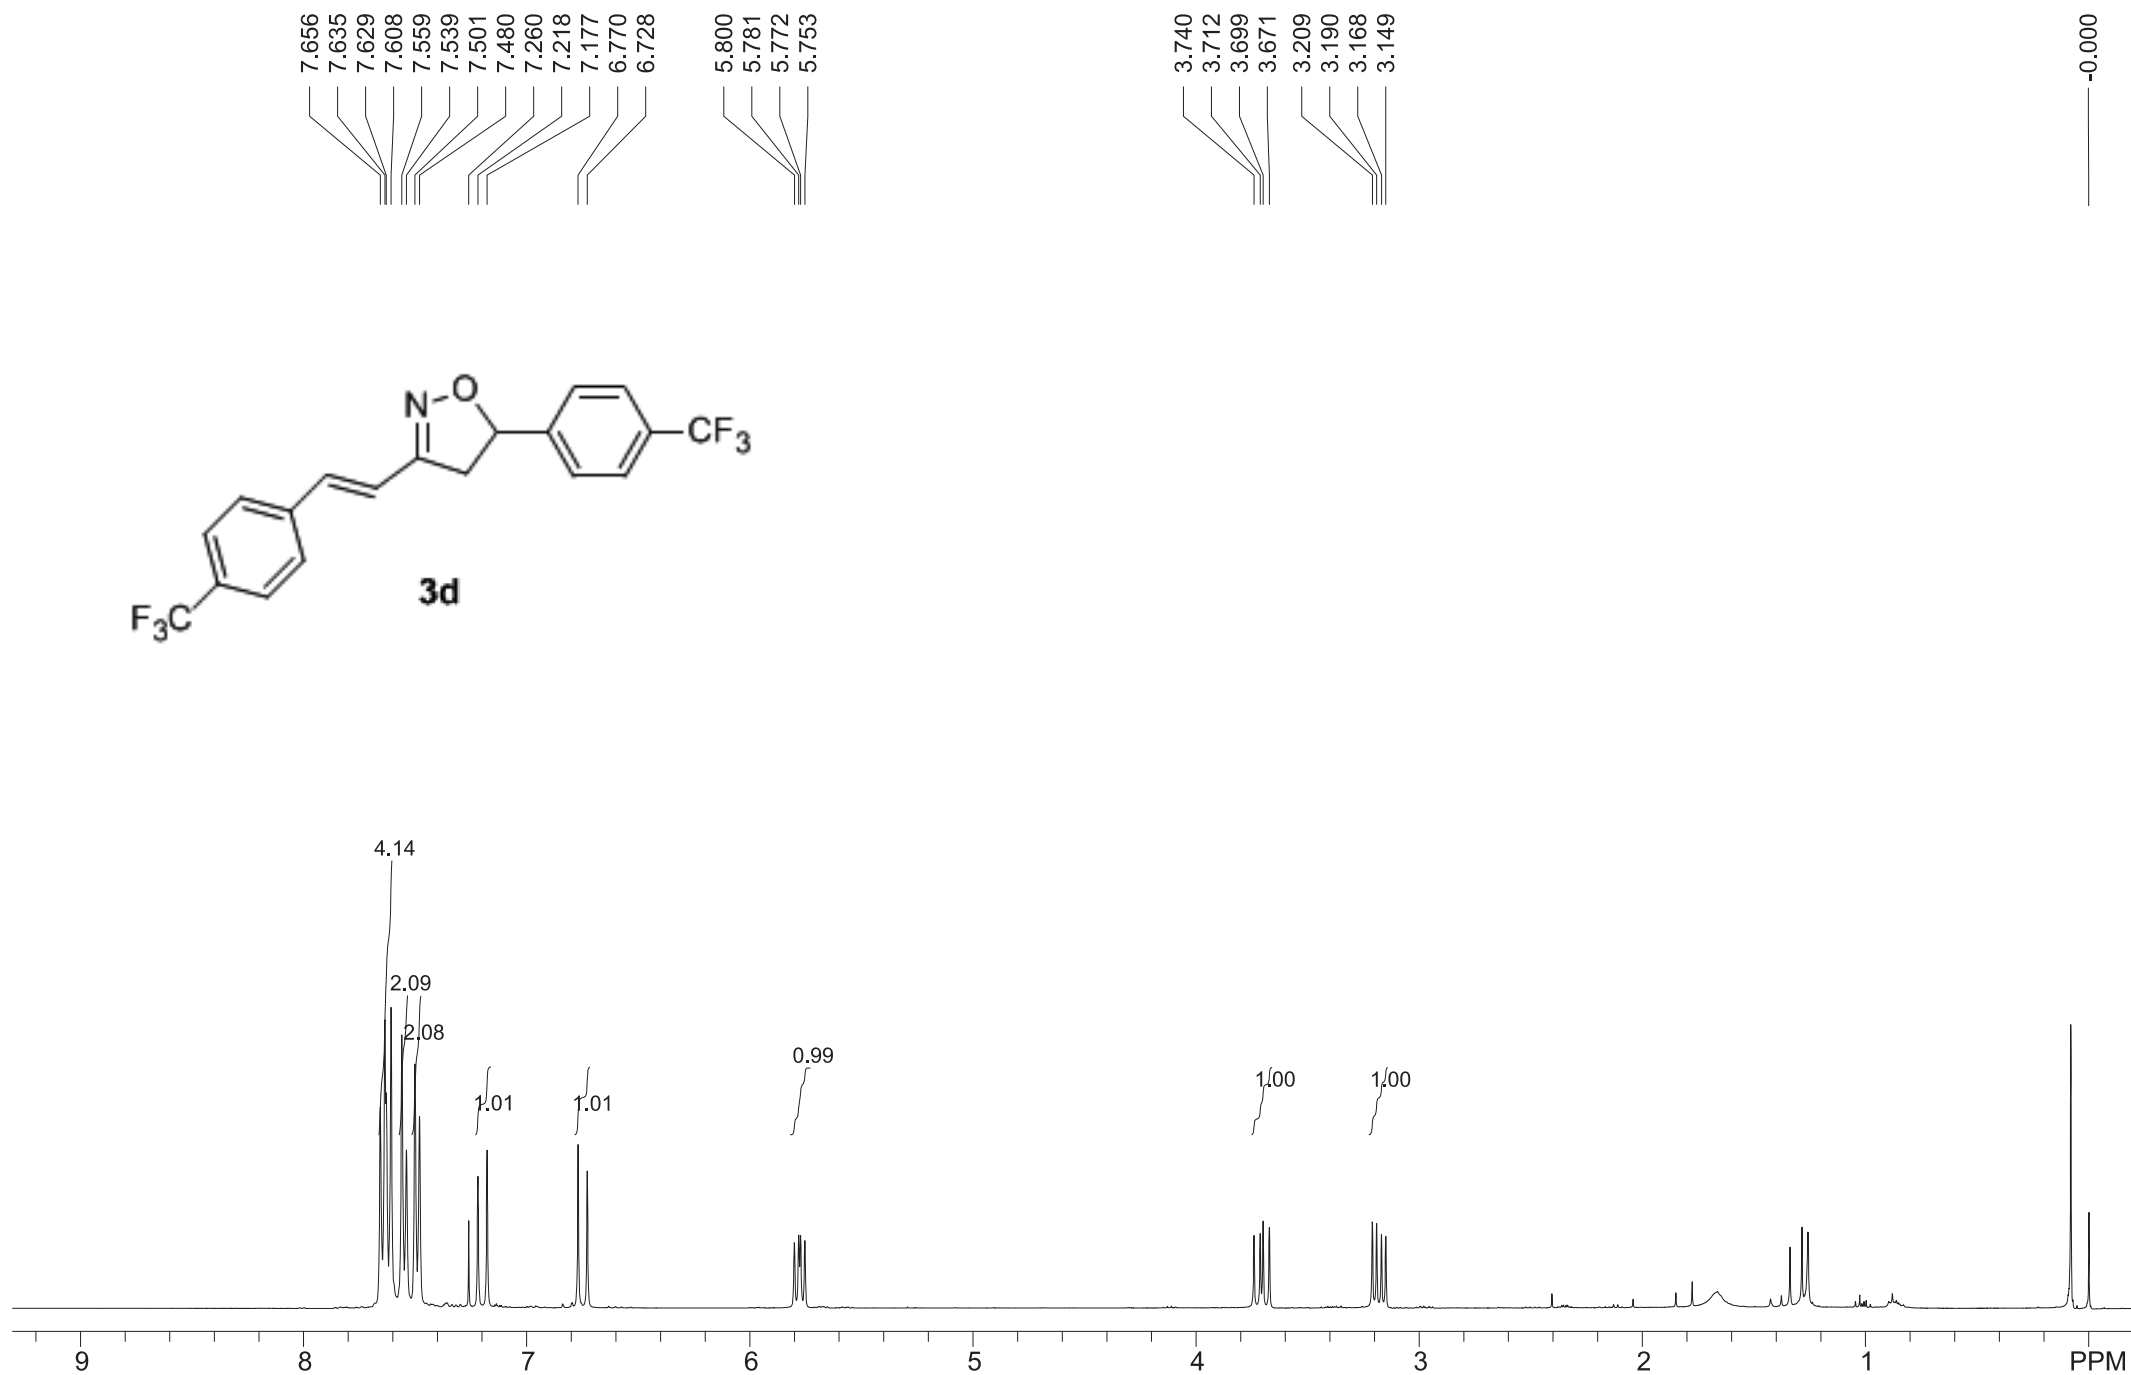

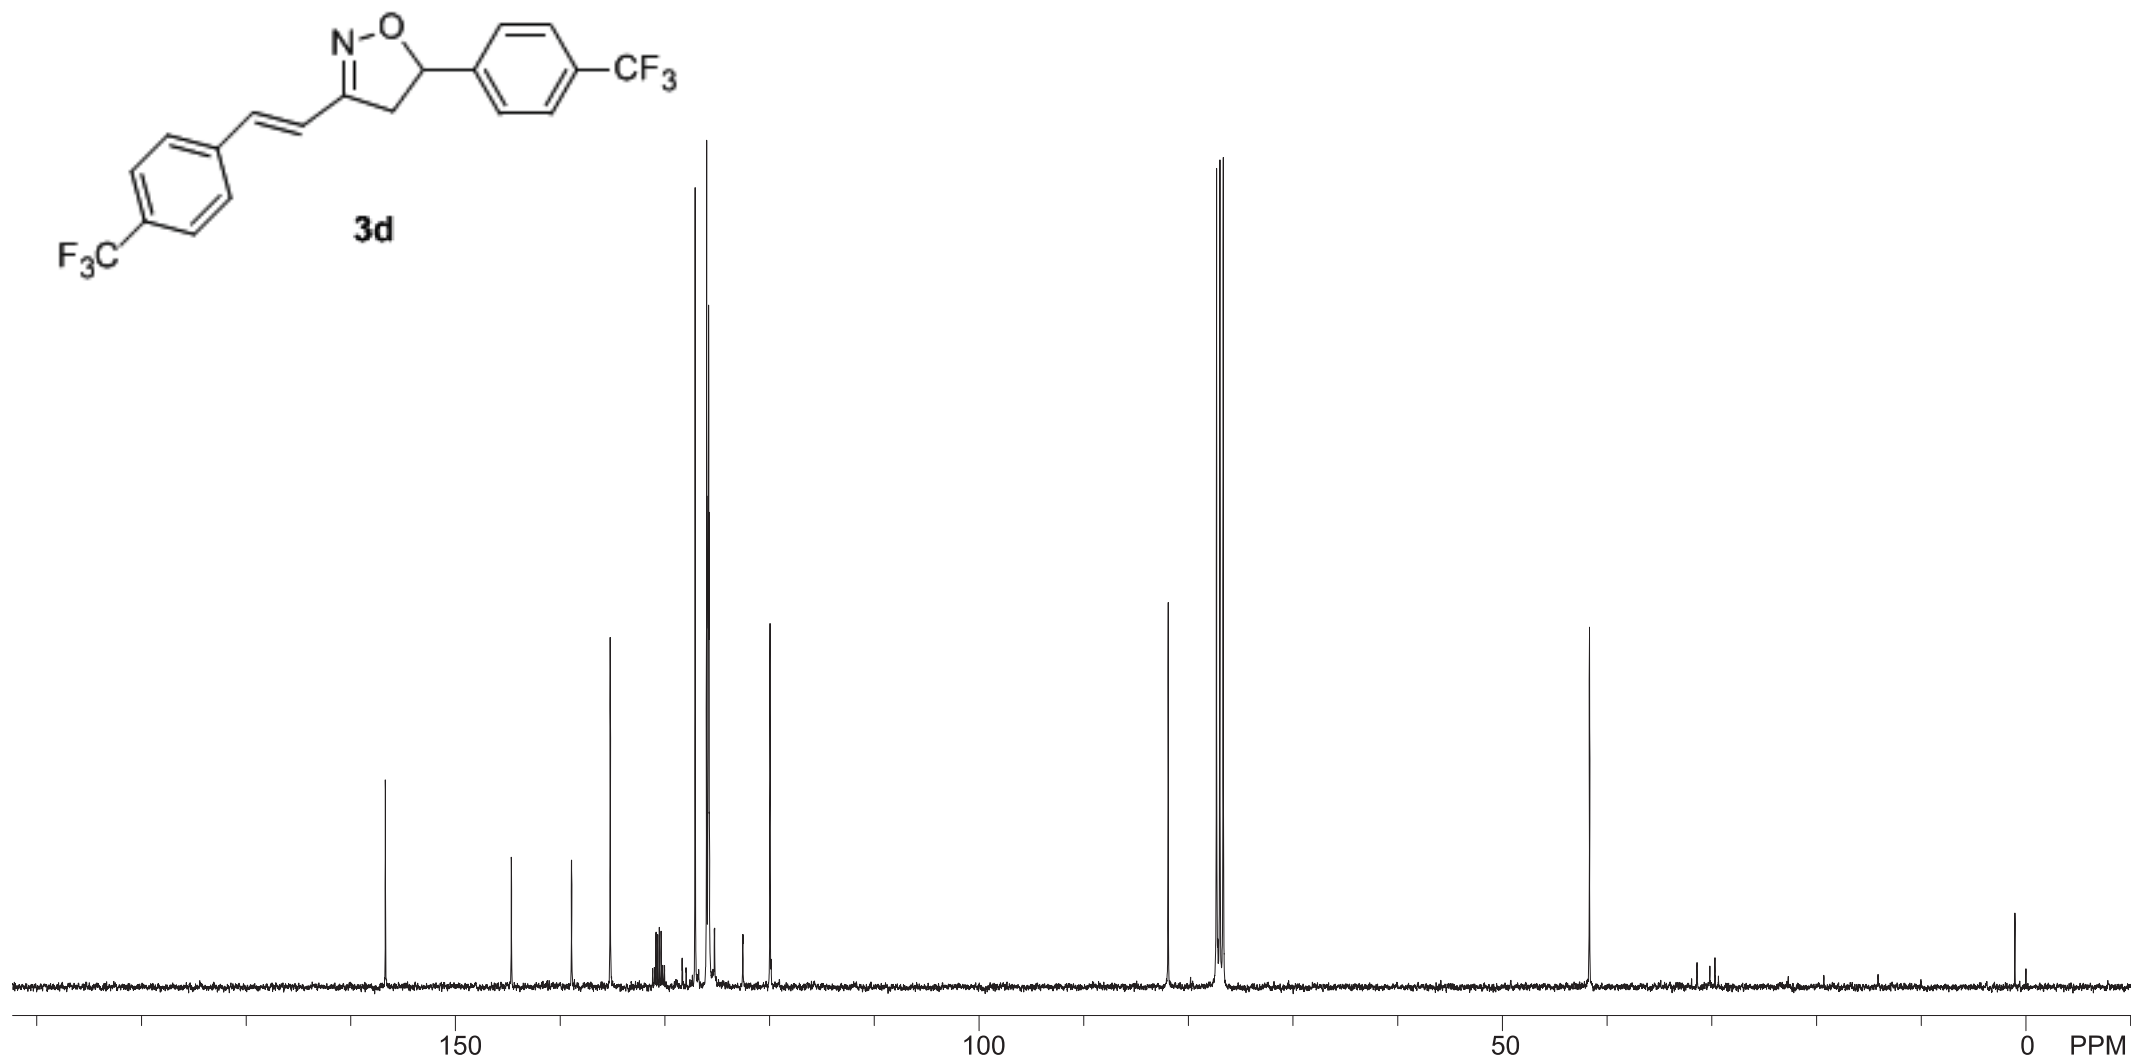

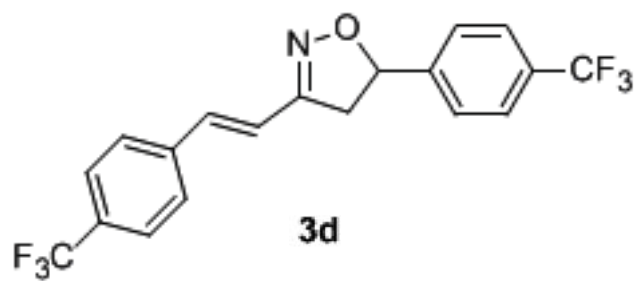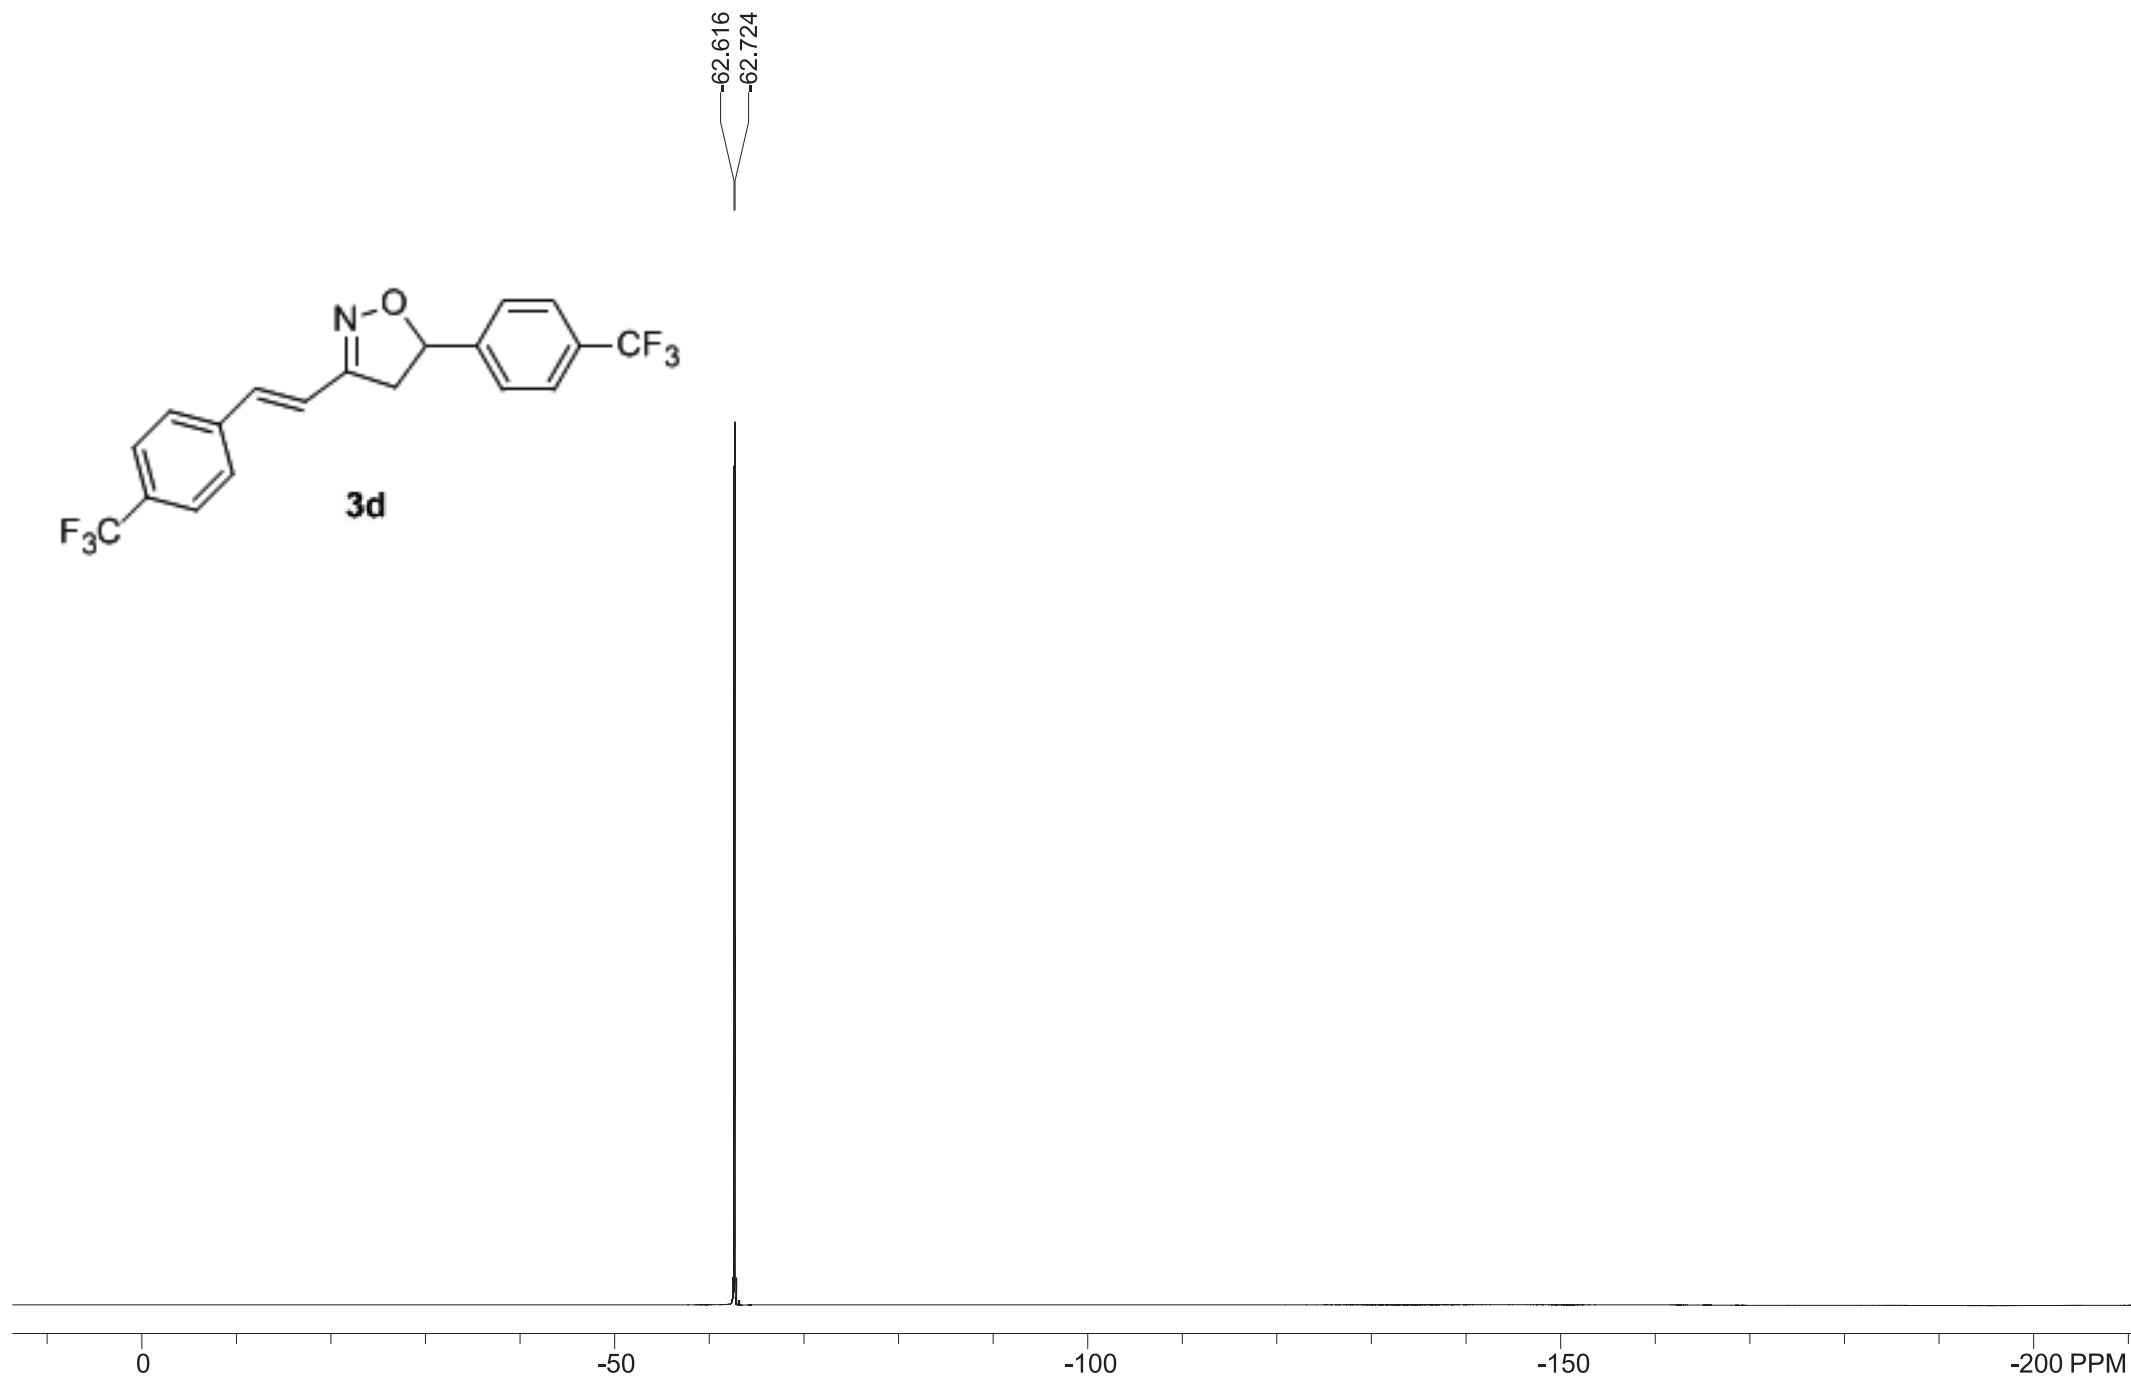

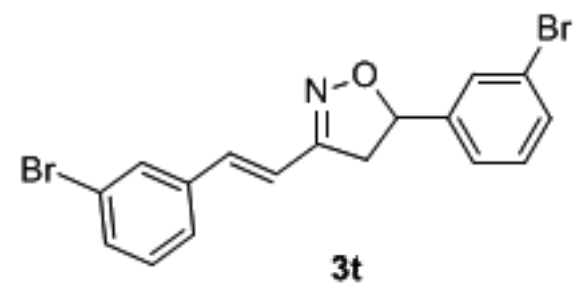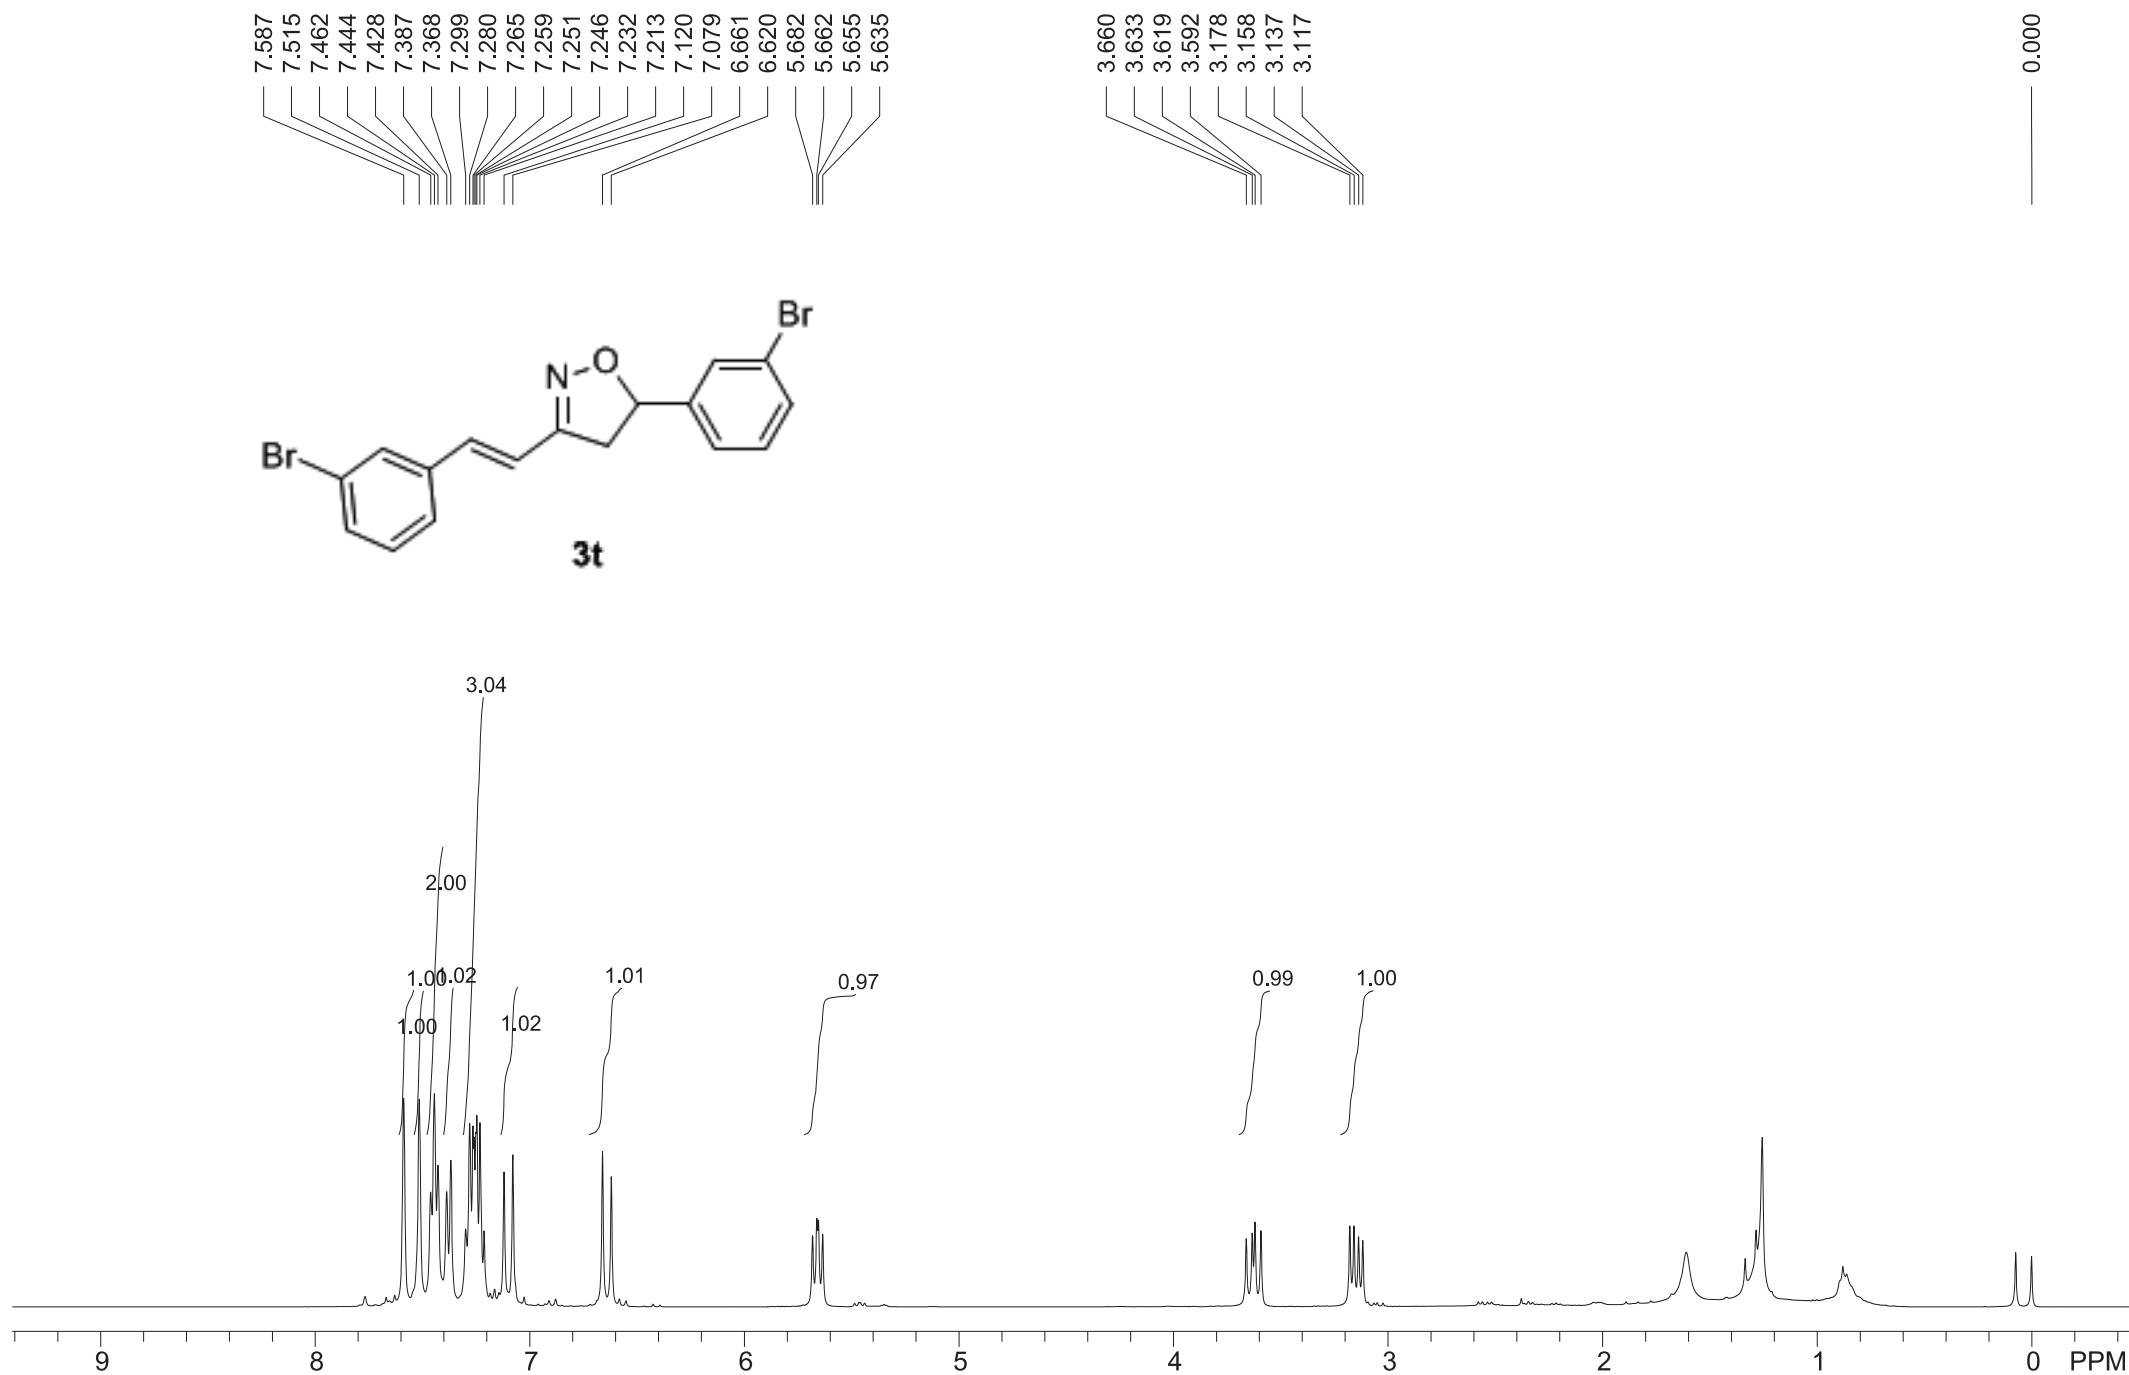



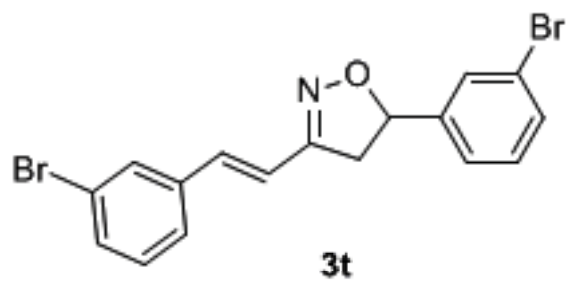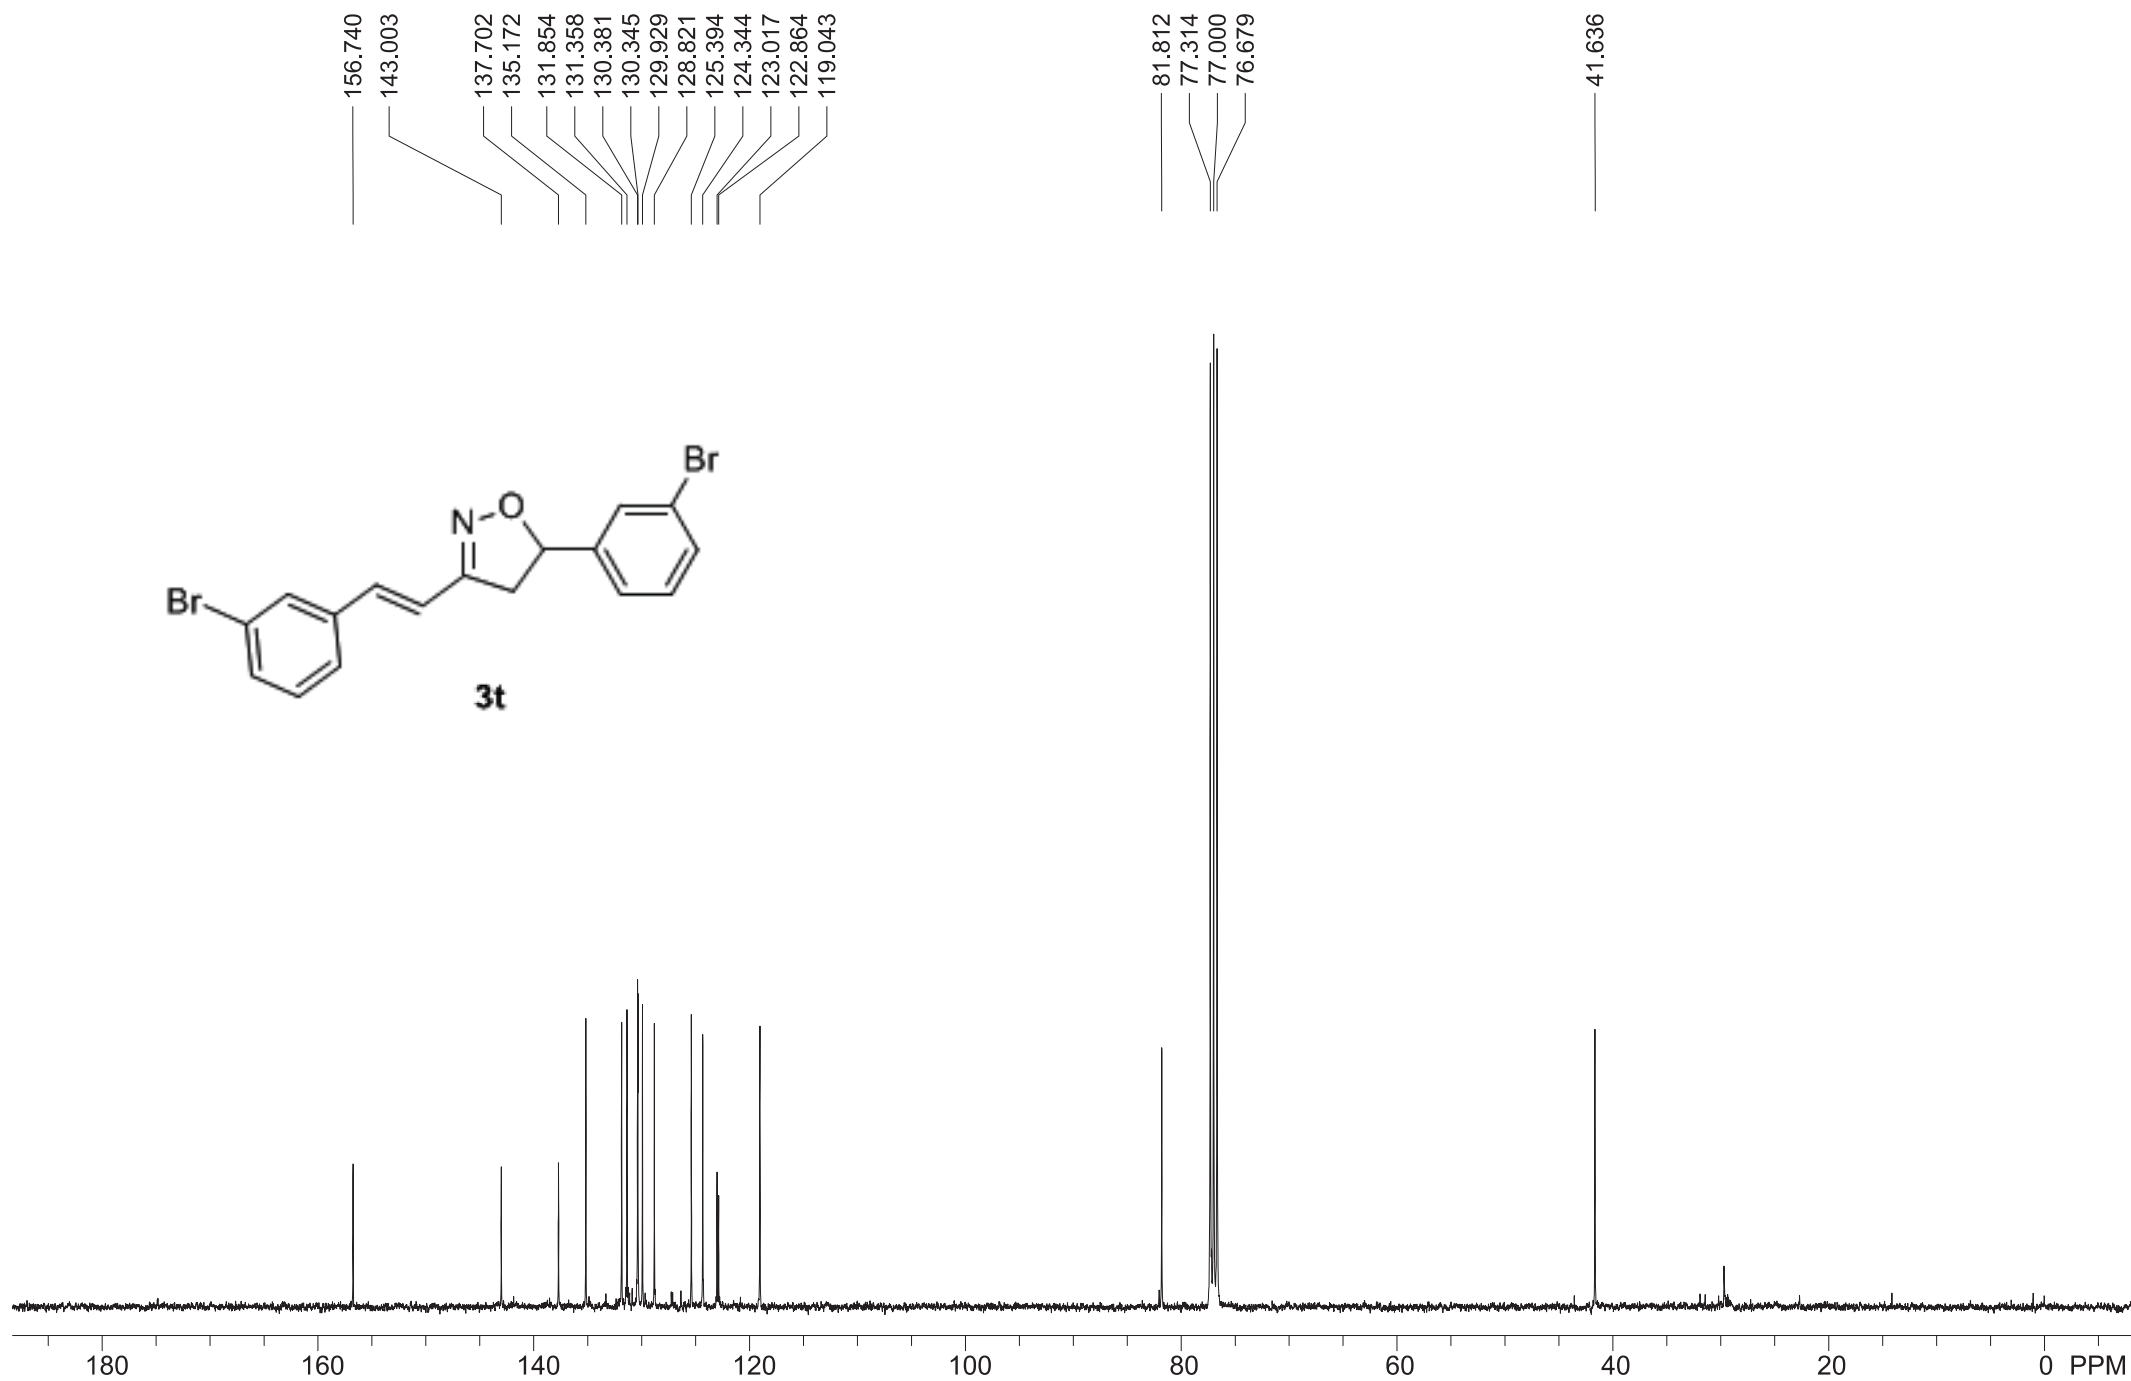



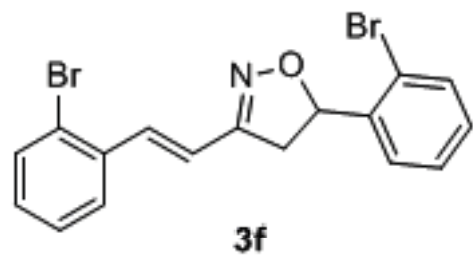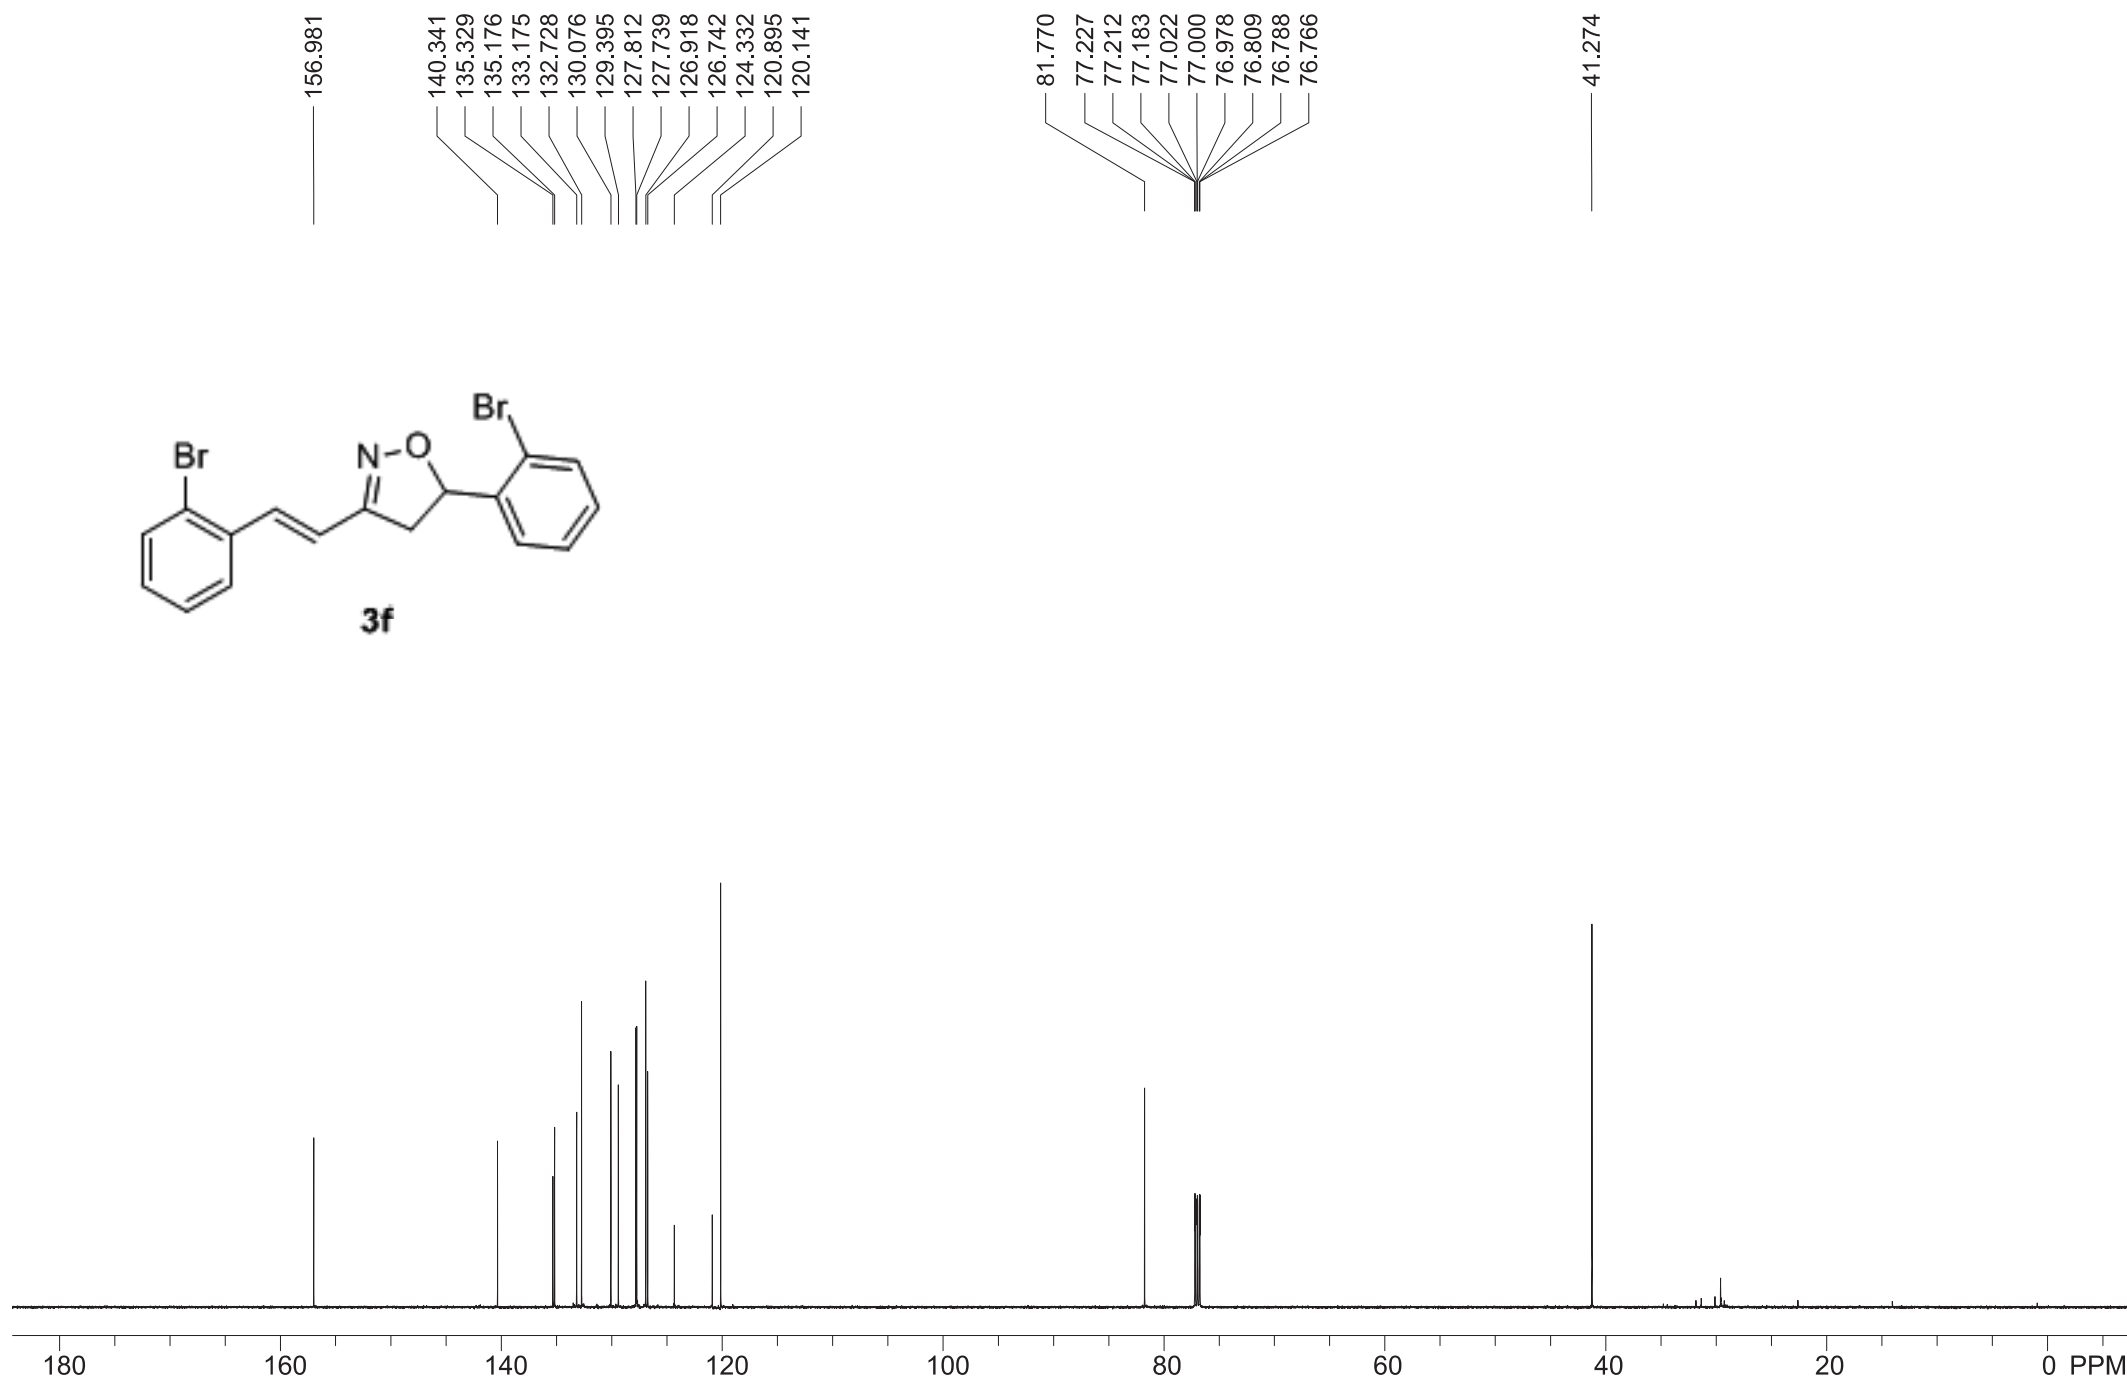

7.446  
7.444  
7.419  
7.417  
7.415  
7.260  
7.013  
6.972  
6.594  
6.554  
6.461  
6.453  
6.443  
6.439  
6.435  
6.430  
6.409  
6.401  
6.366  
6.362  
6.359  
6.354  
5.662  
5.637  
5.614

3.420  
3.395

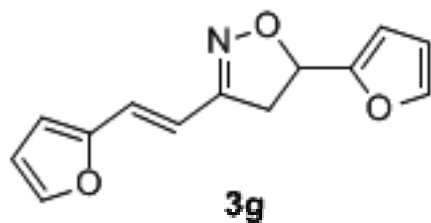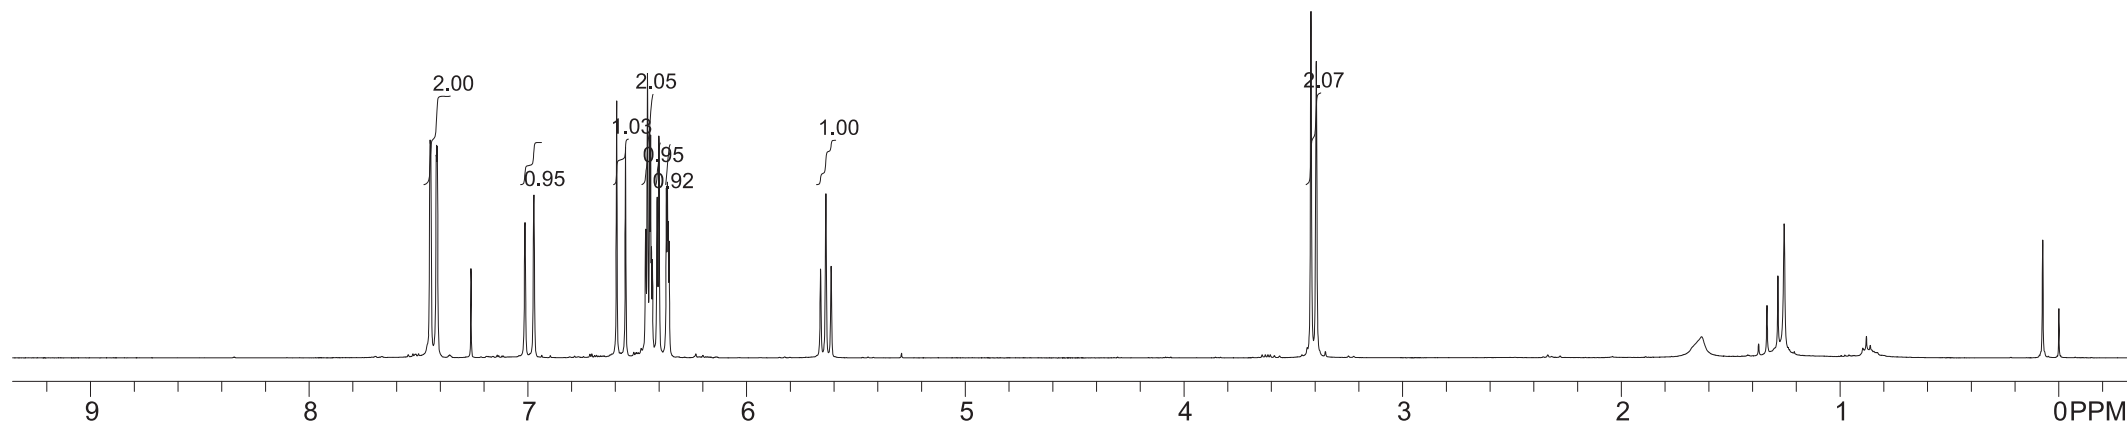

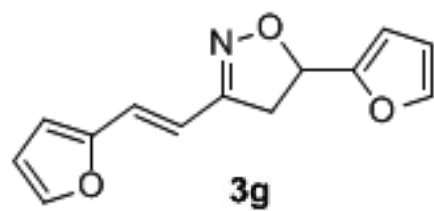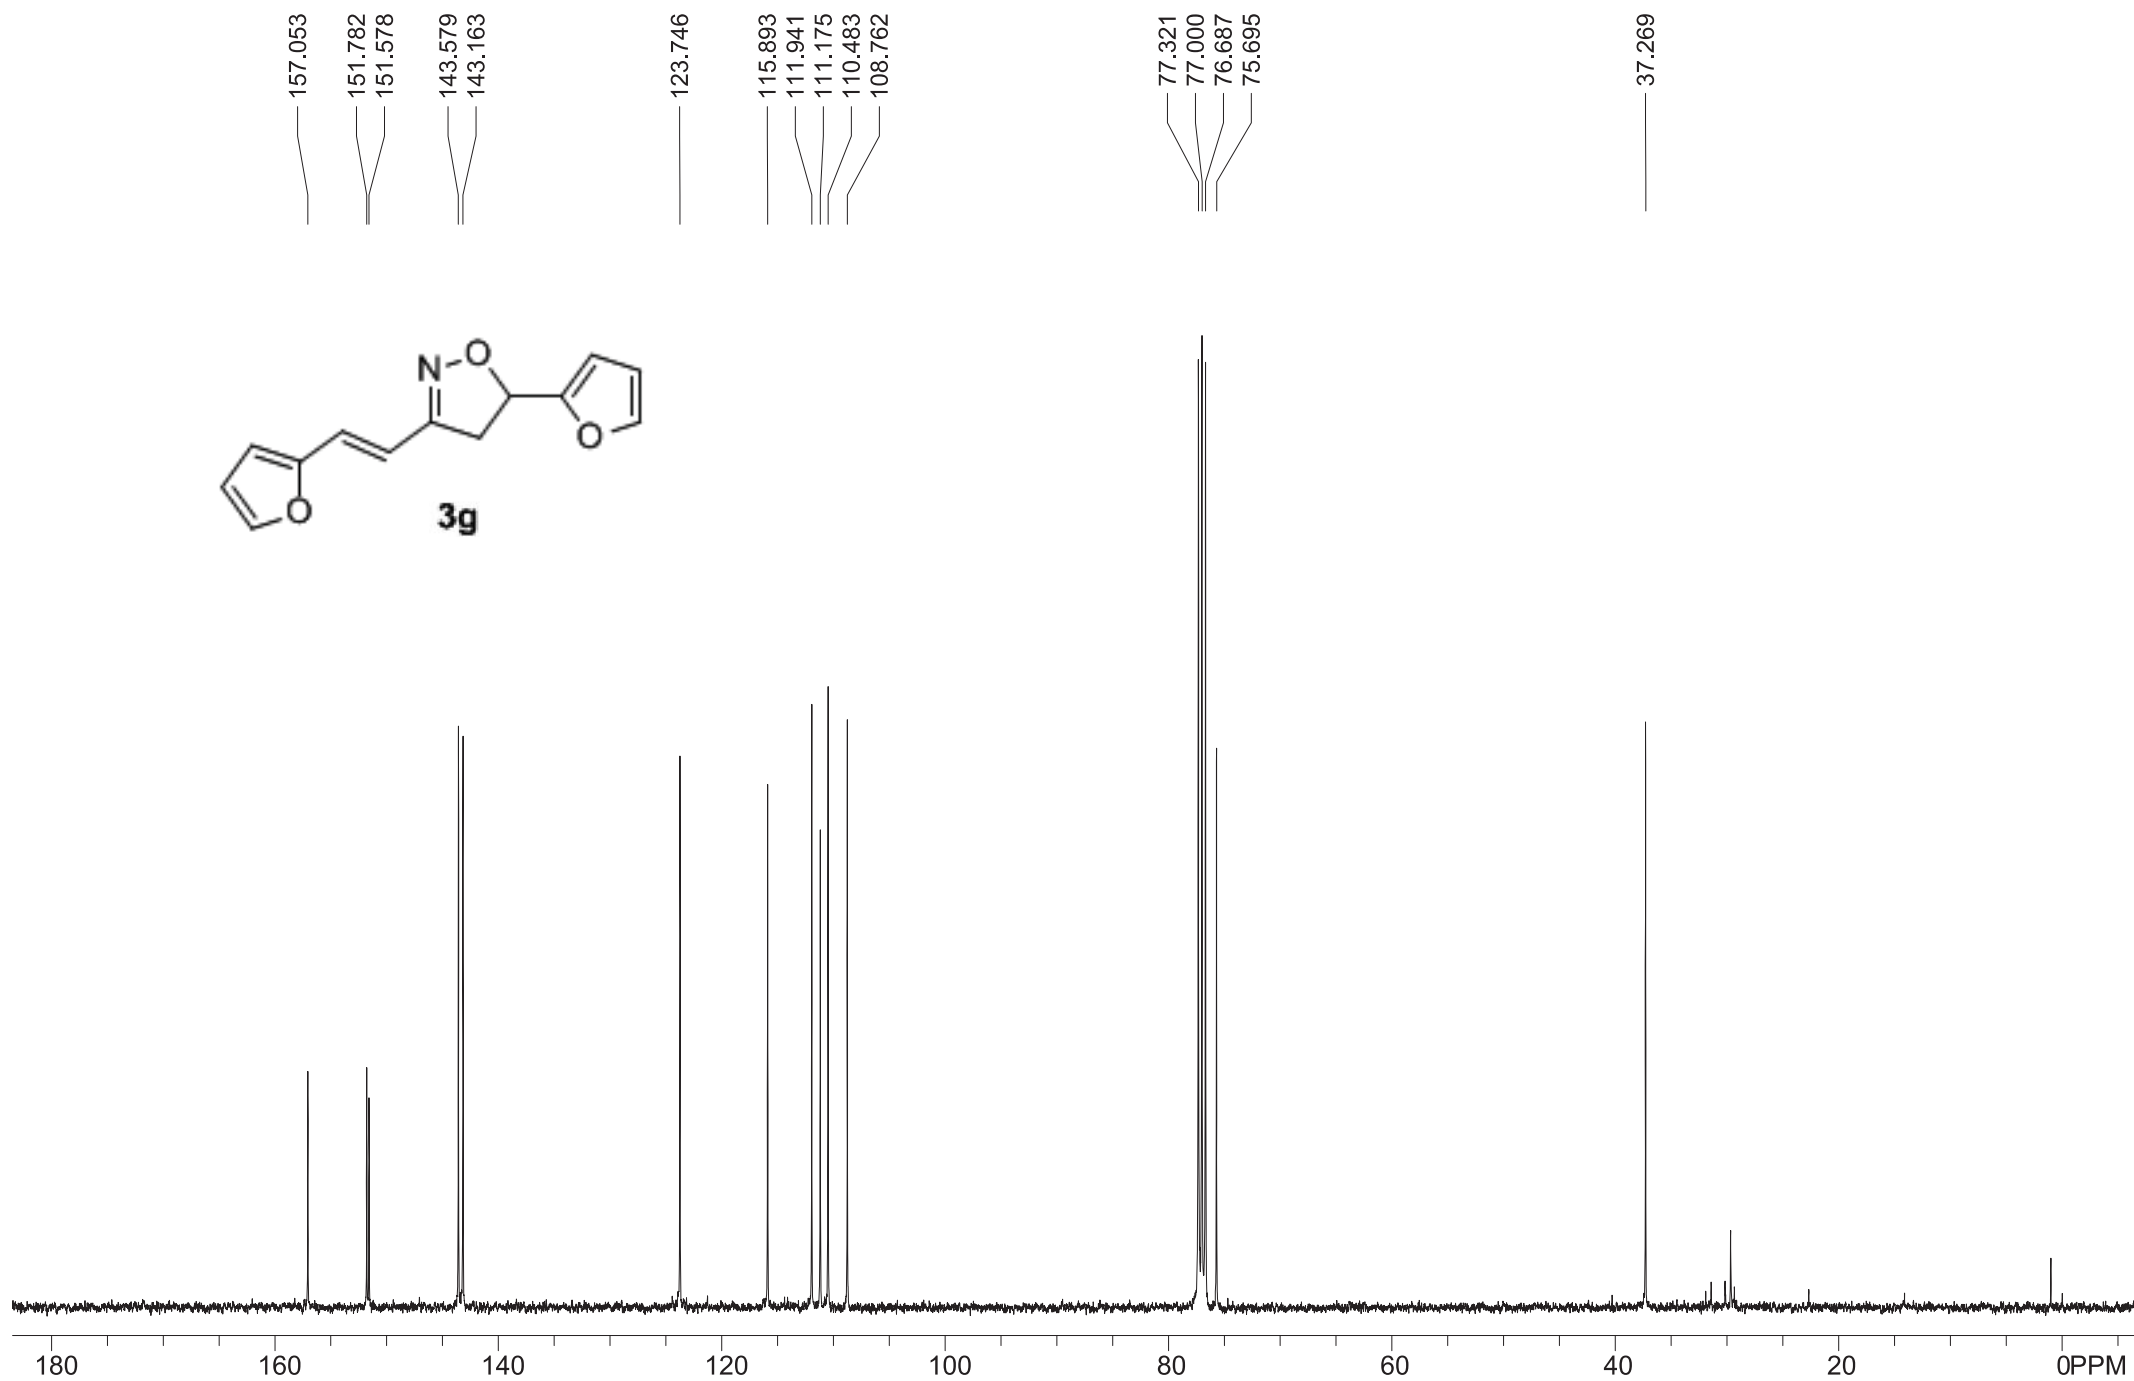

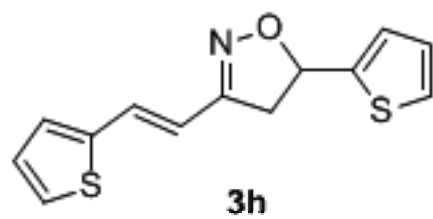

7.306  
7.294  
7.260  
7.127  
7.119  
7.094  
7.087  
7.033  
7.021  
7.011  
7.004  
6.993  
6.983  
6.913  
6.907  
5.911  
5.890  
5.886  
5.864

3.605  
3.578  
3.564  
3.537  
3.321  
3.300  
3.280  
3.259

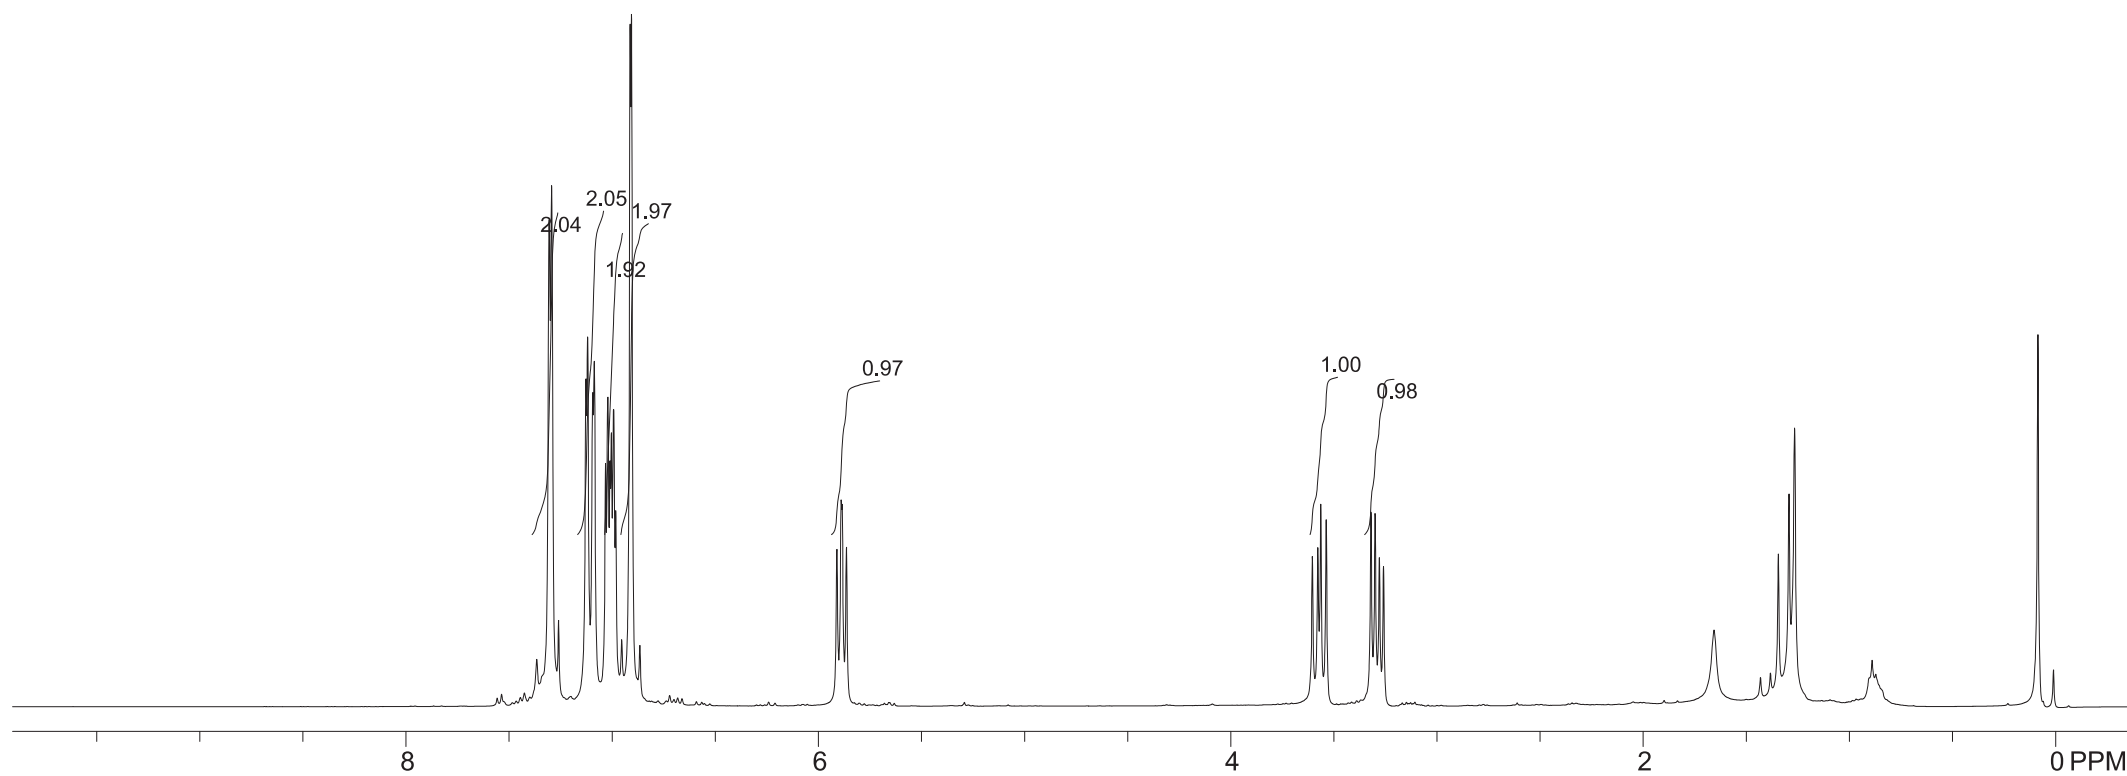

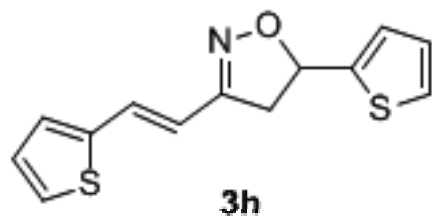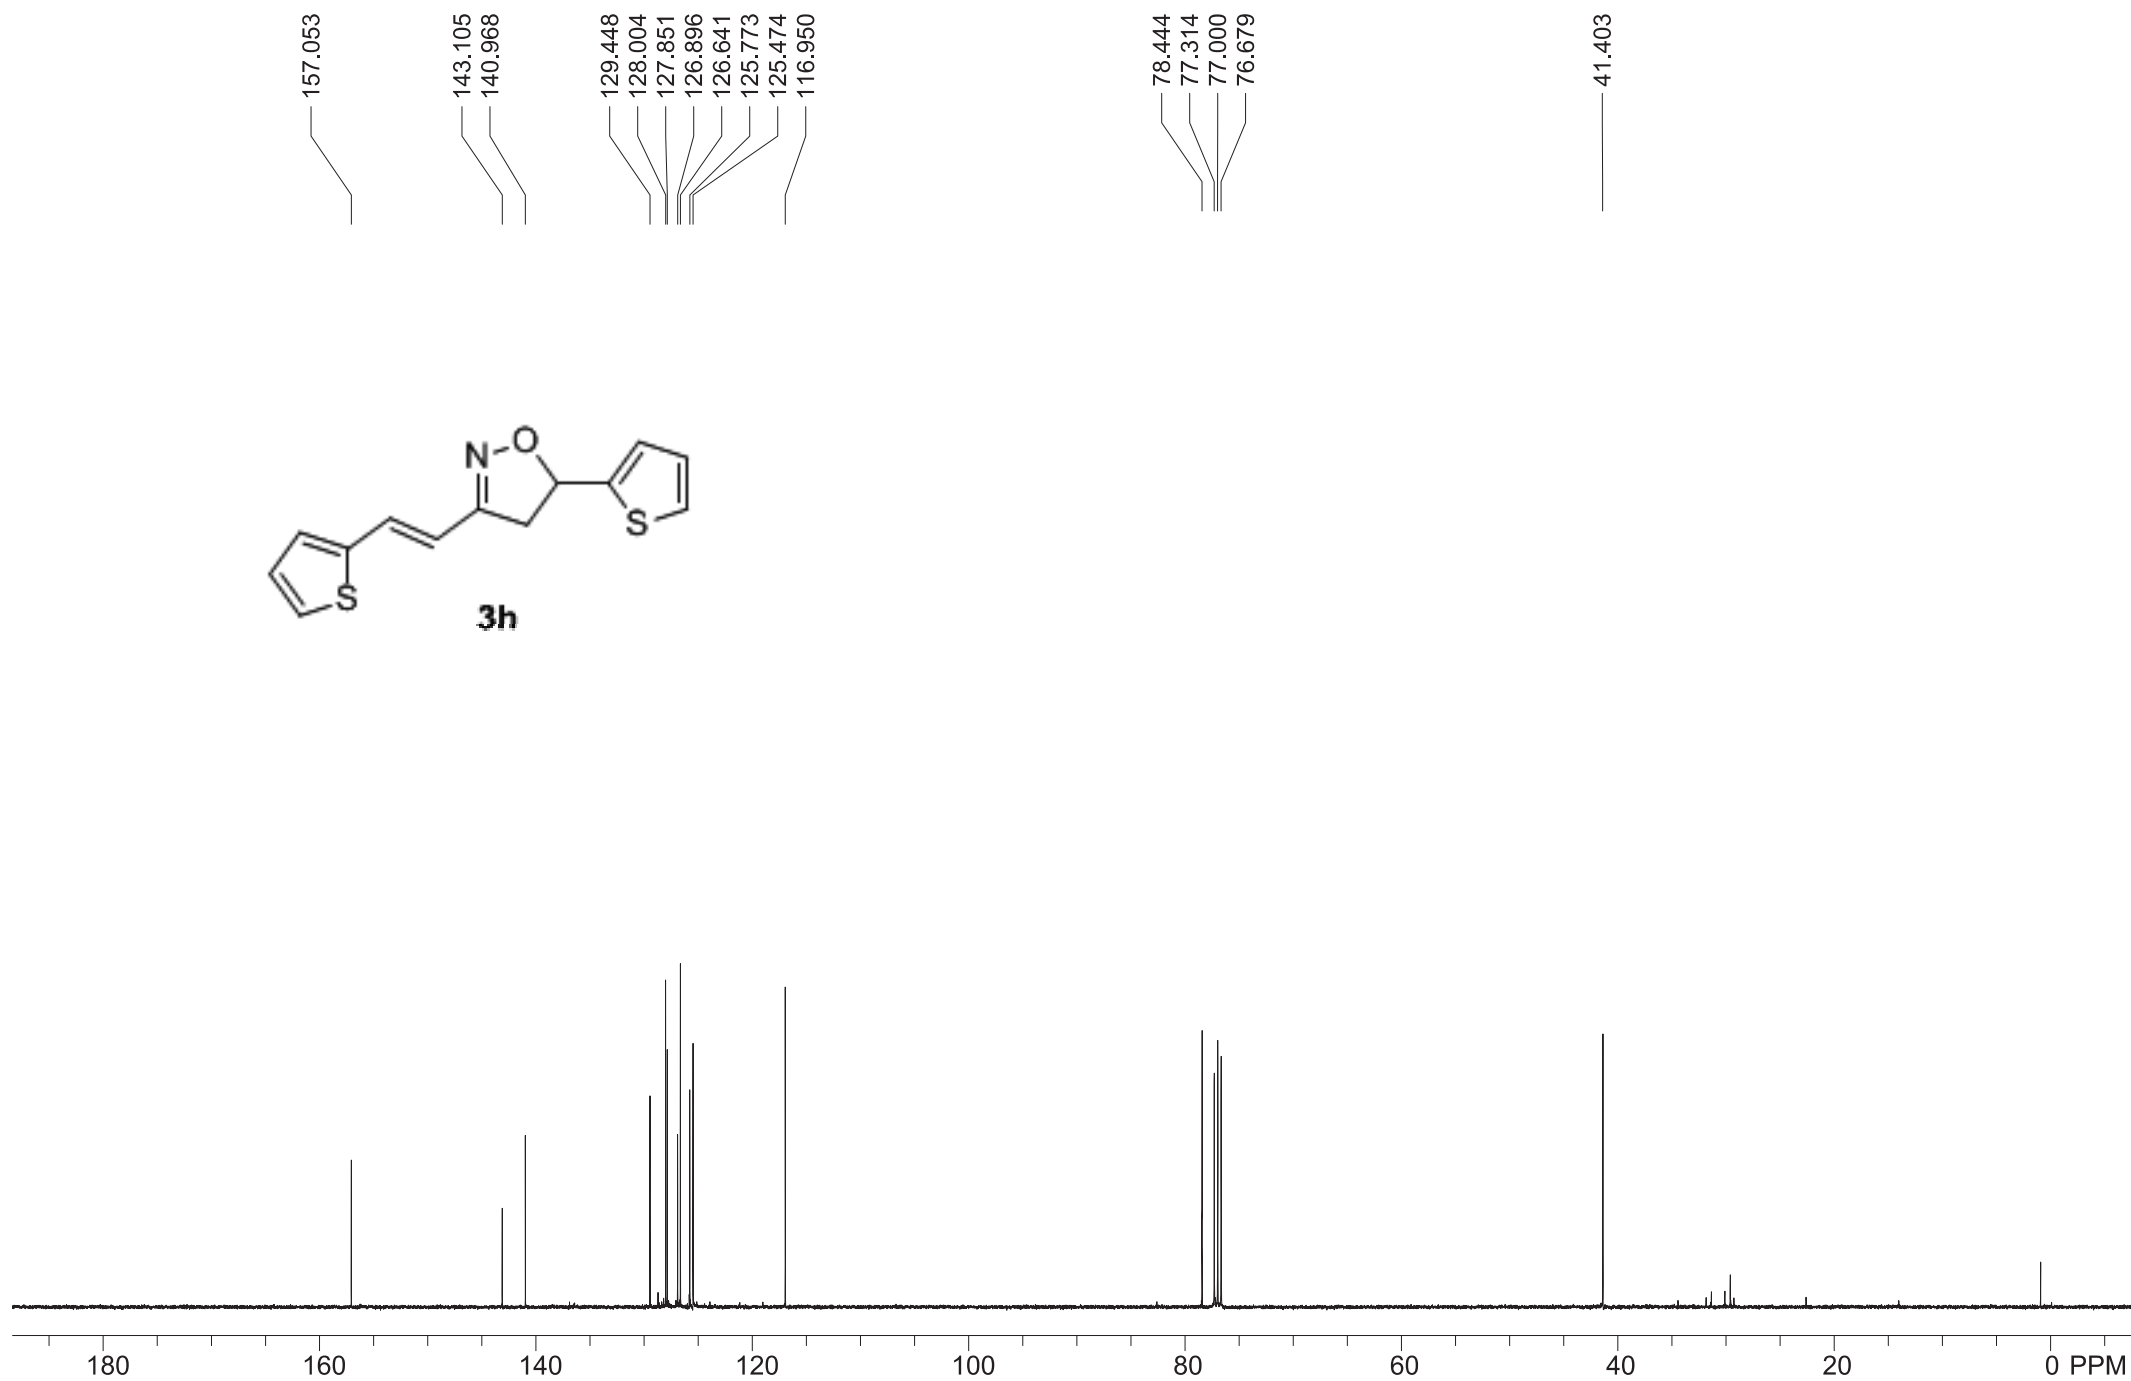

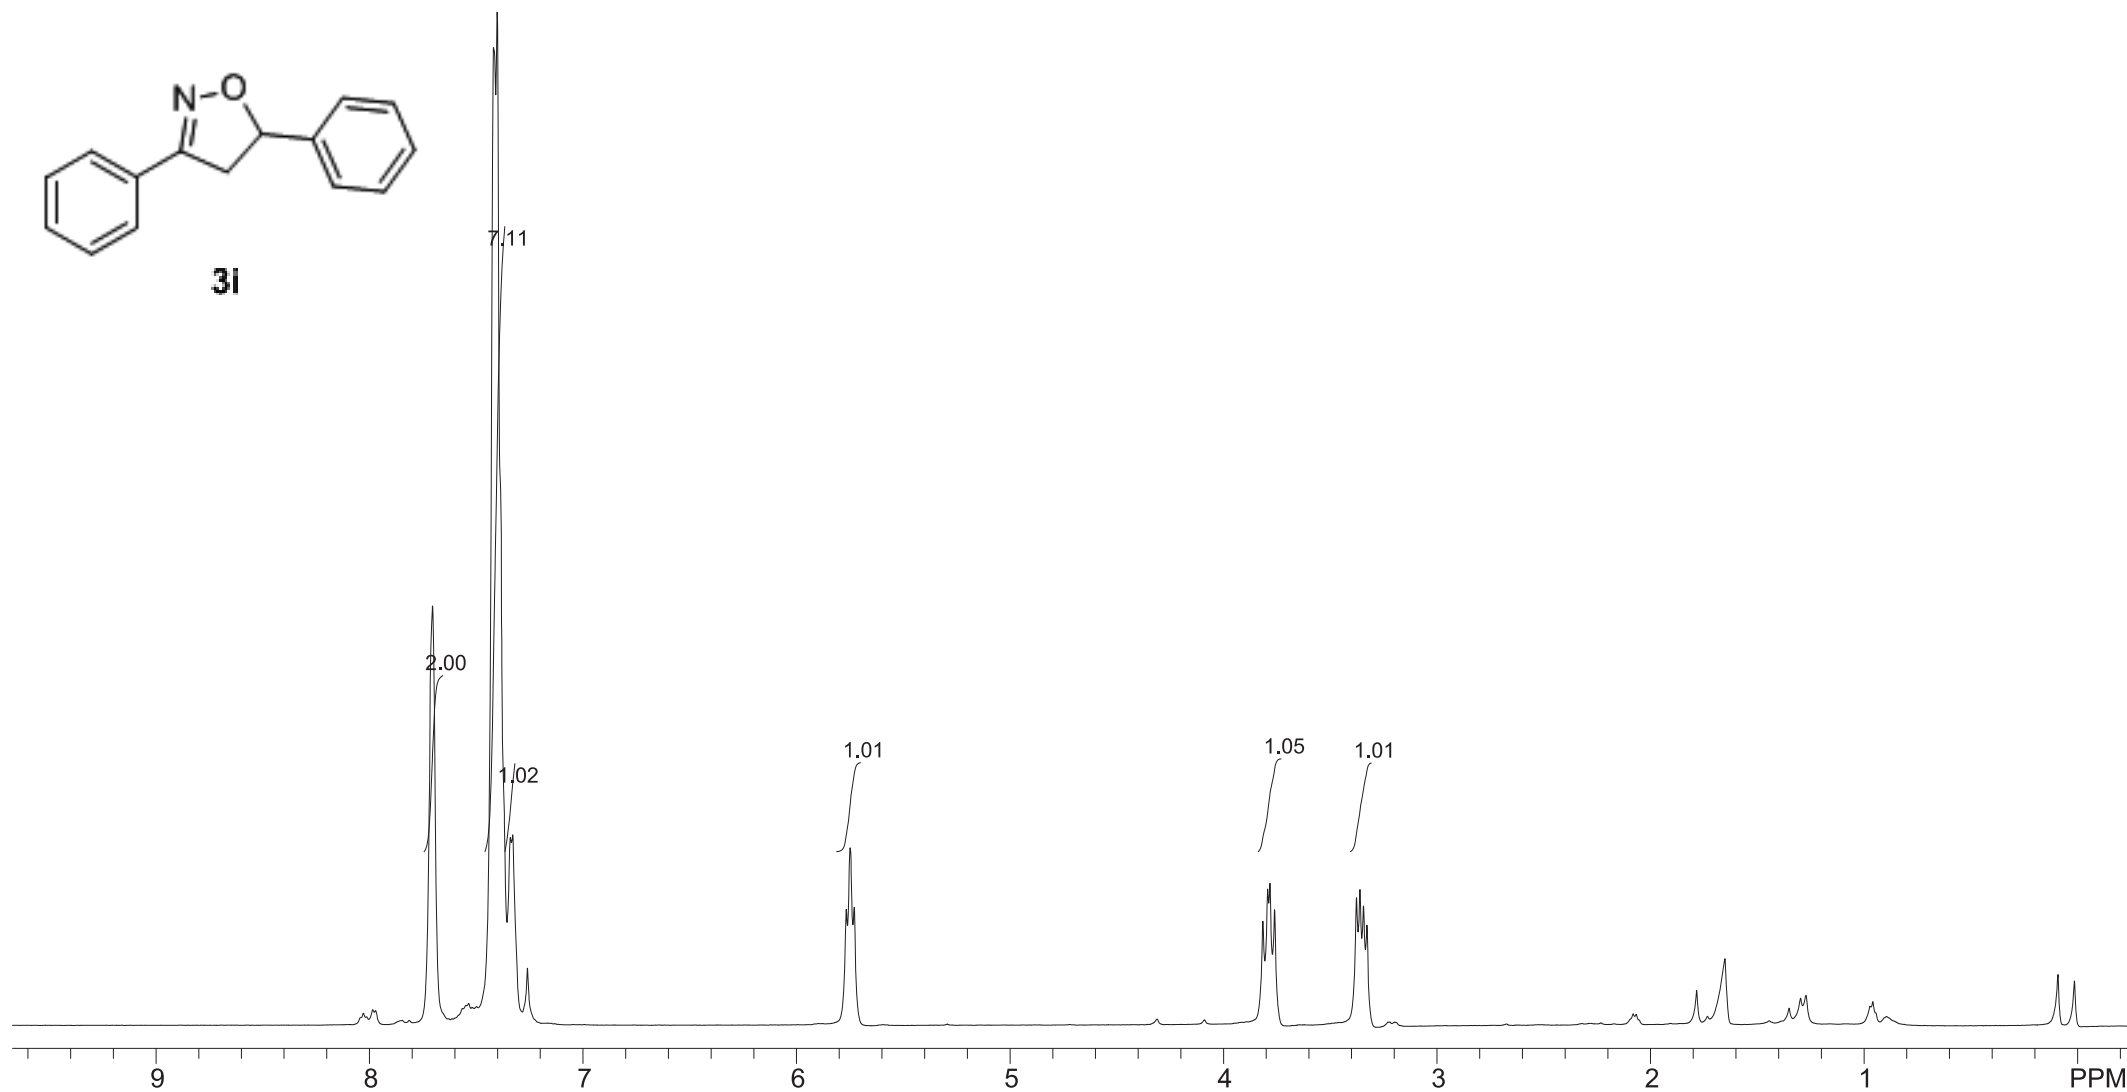



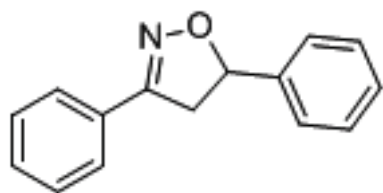

**3i**

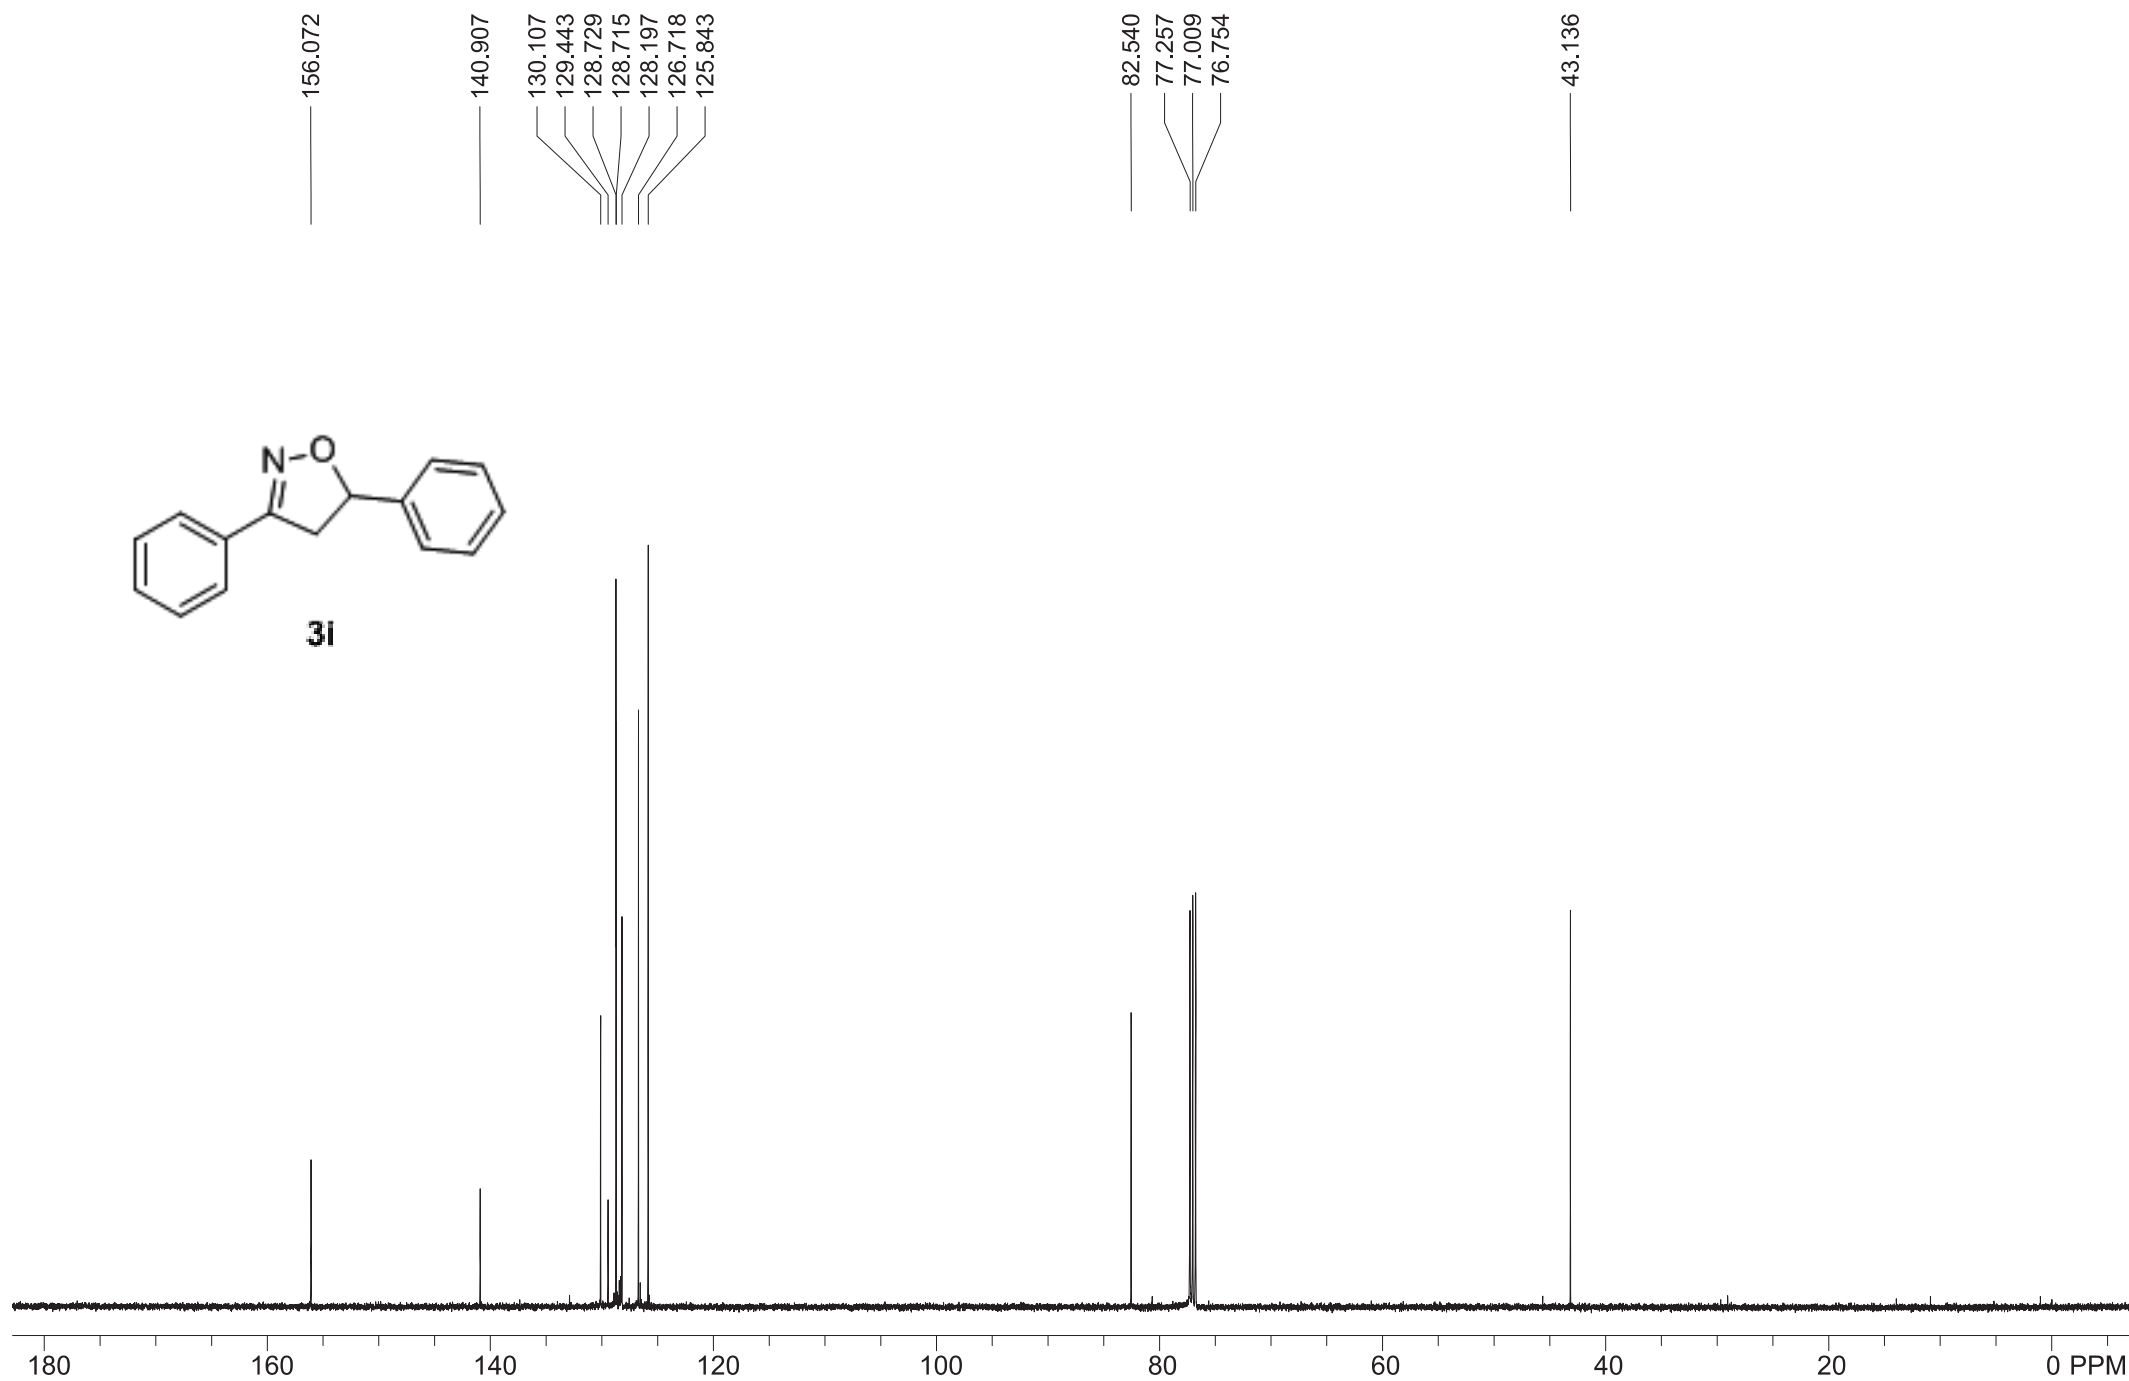

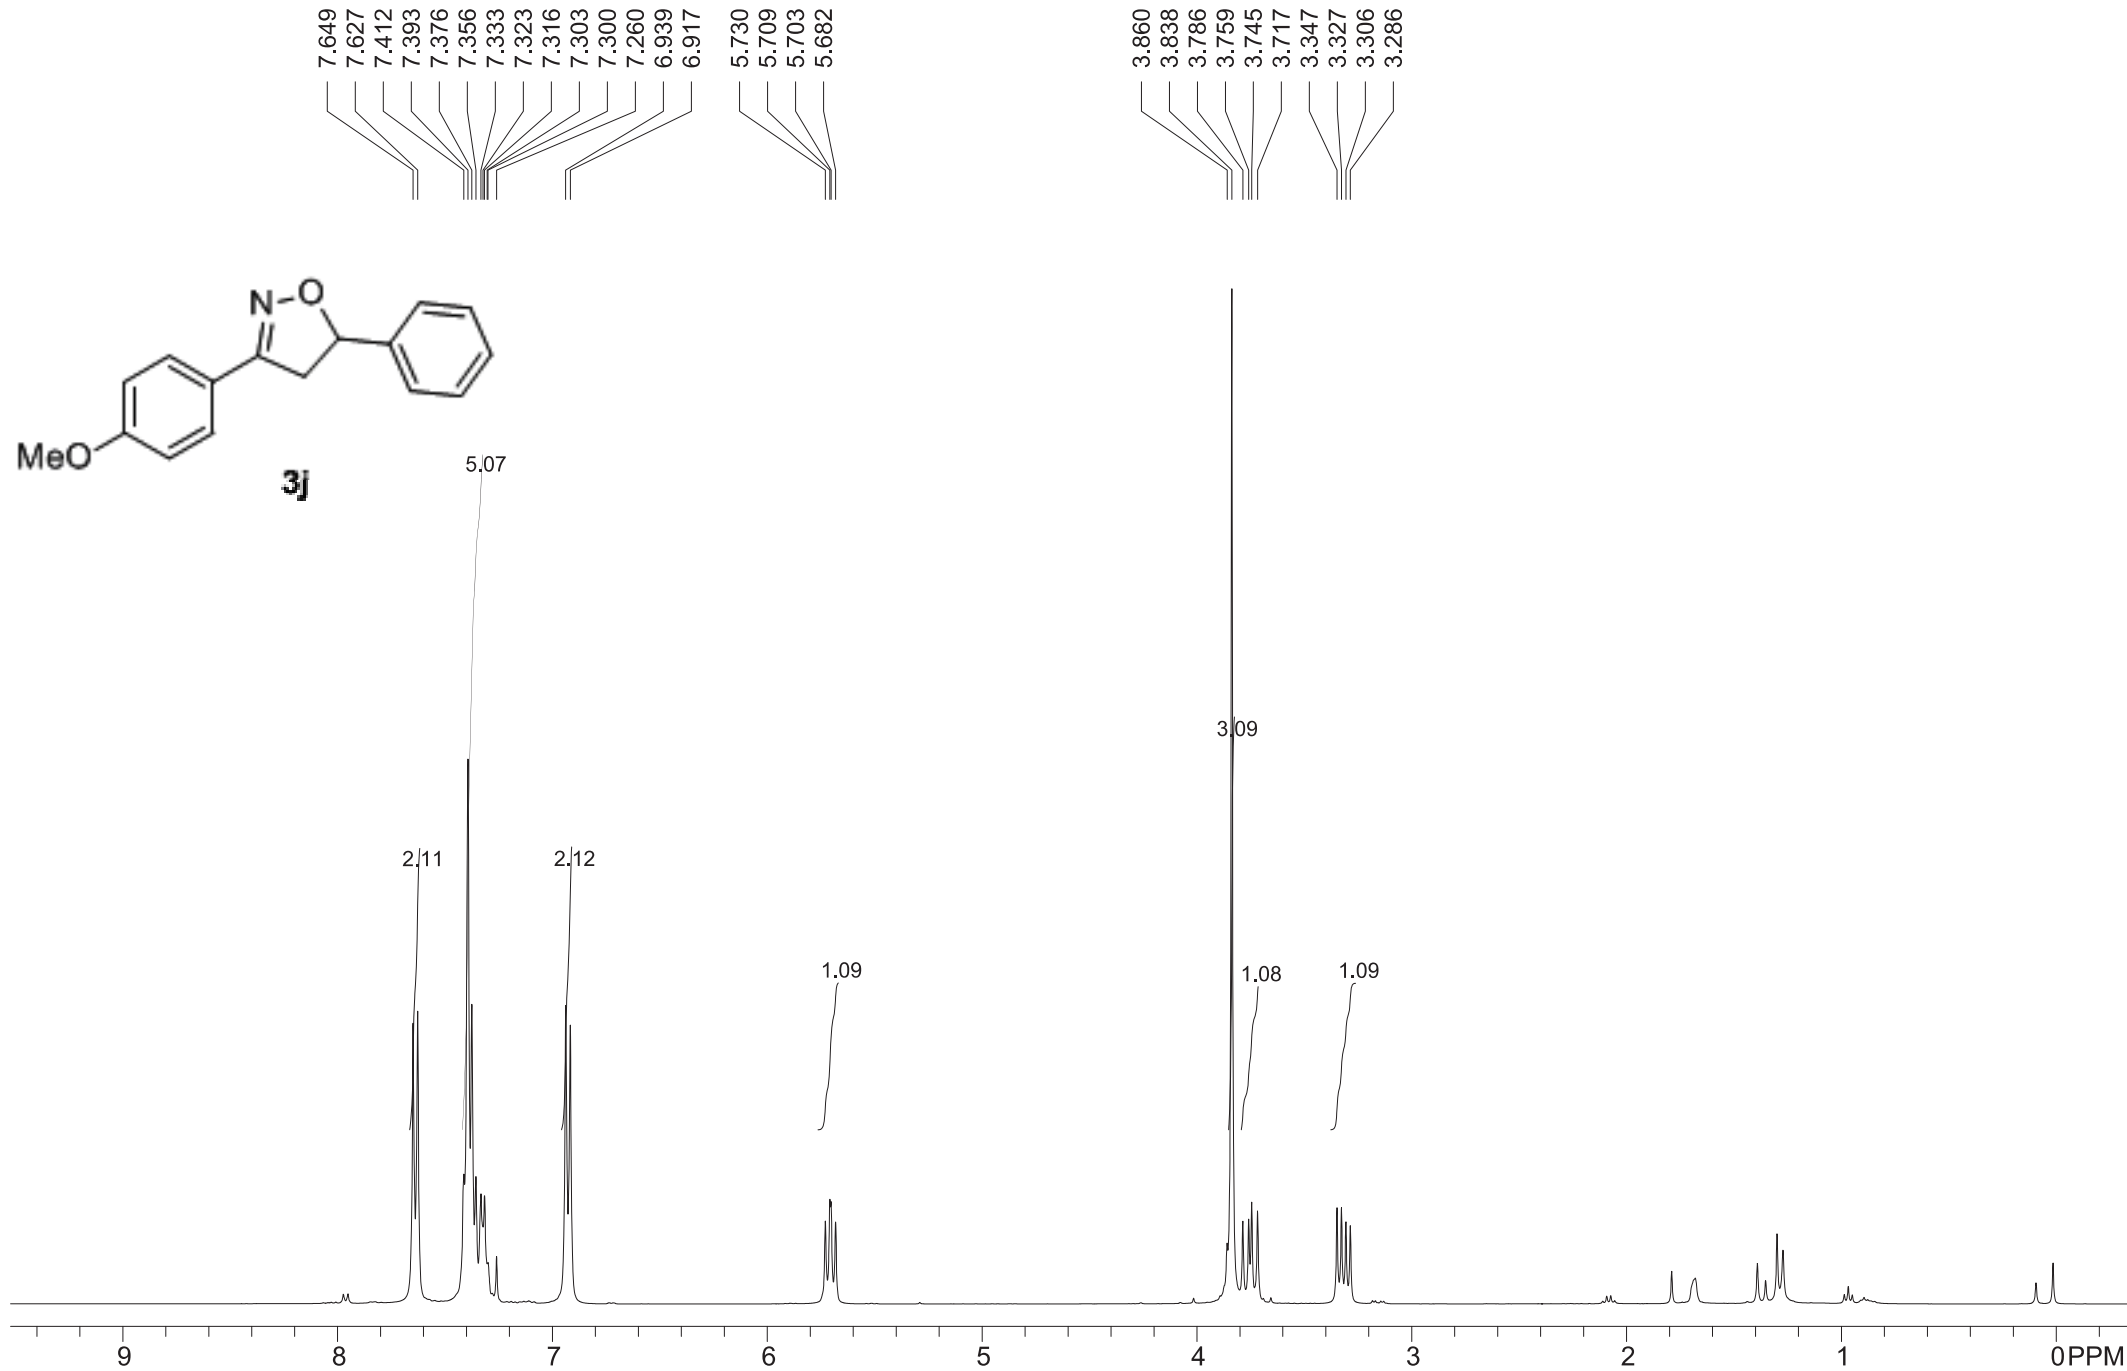

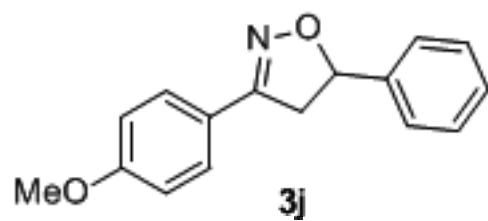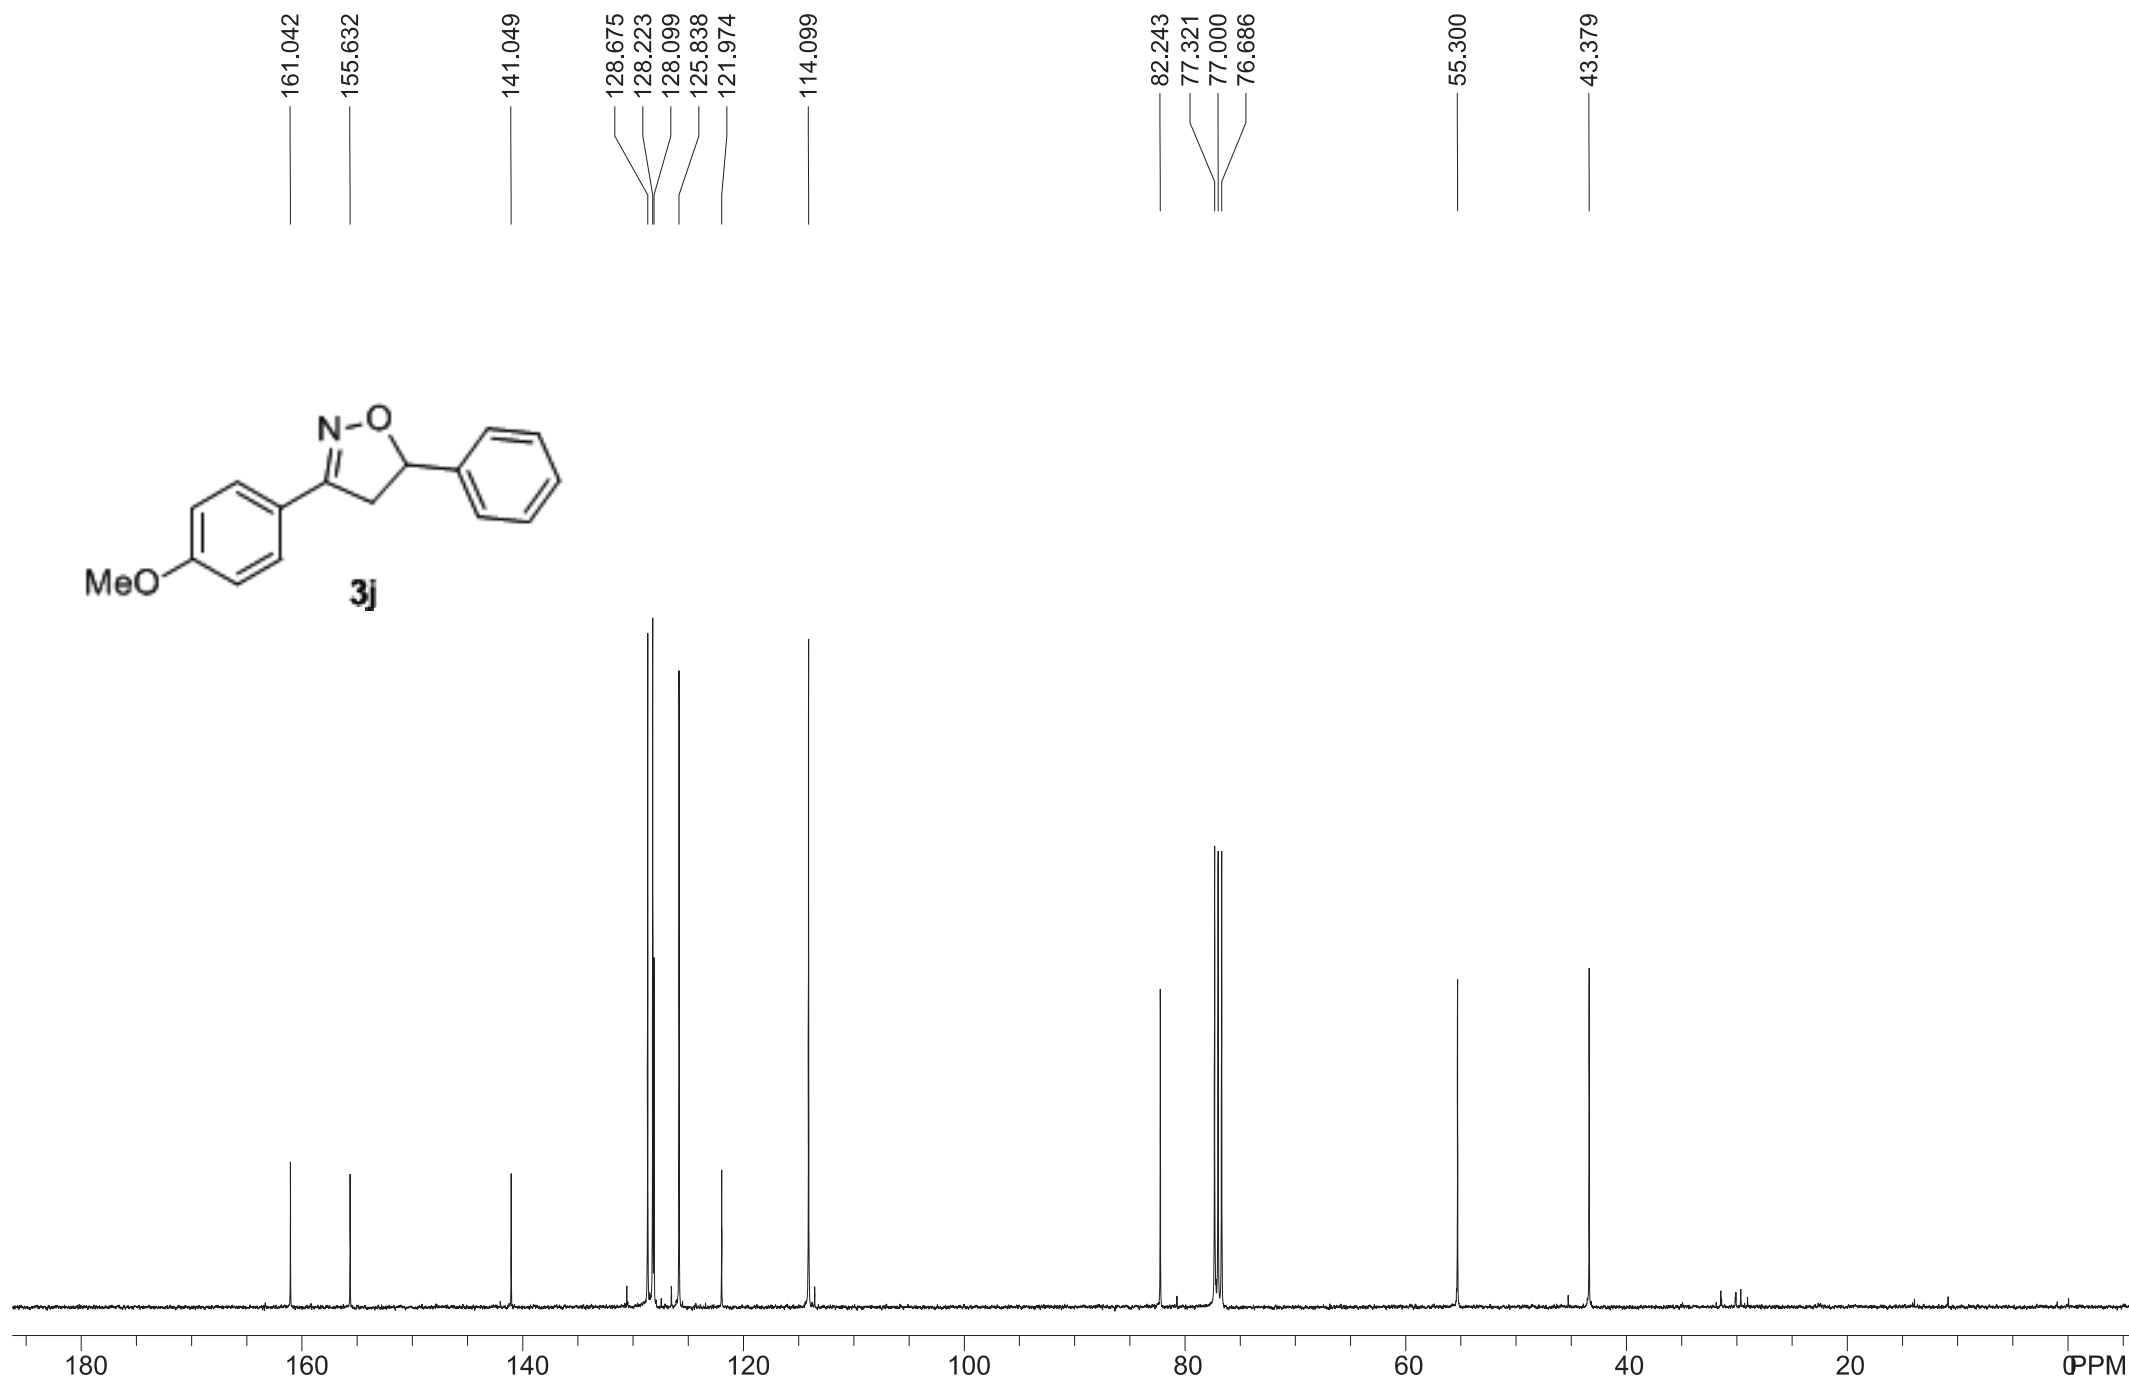

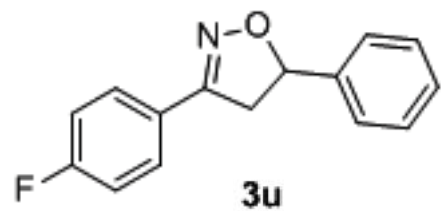

7.705  
7.691  
7.684  
7.670  
7.396  
7.389  
7.363  
7.348  
7.342  
7.328  
7.260  
7.121  
7.100  
7.078  
5.767  
5.746  
5.740  
5.719

3.793  
3.765  
3.751  
3.724  
3.354  
3.333  
3.312  
3.291

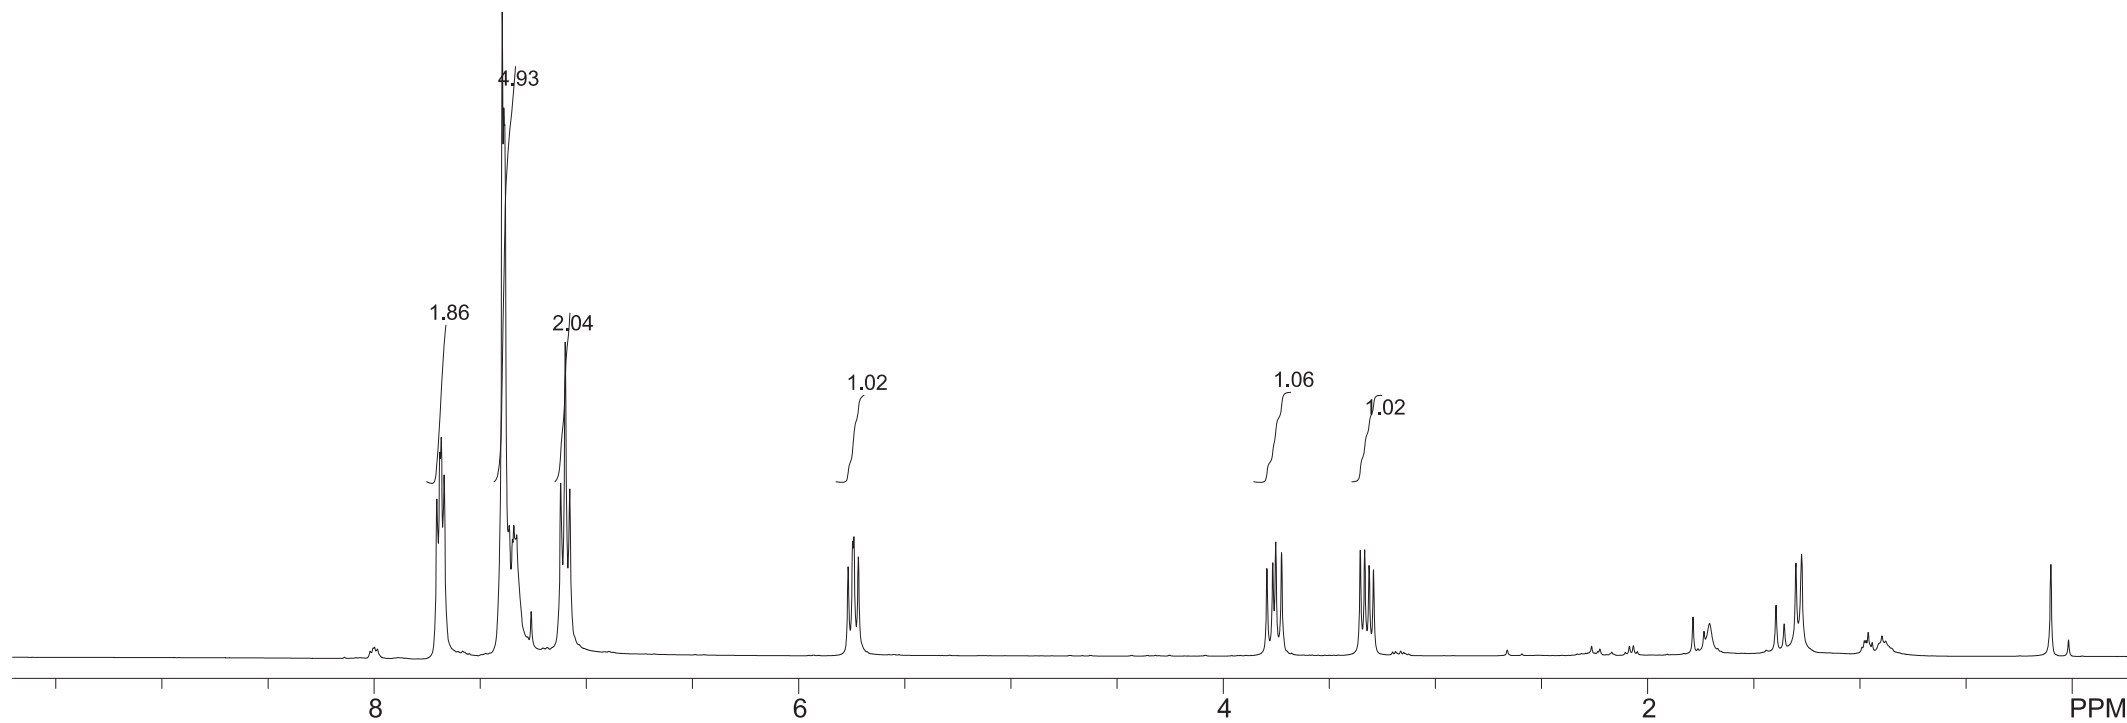

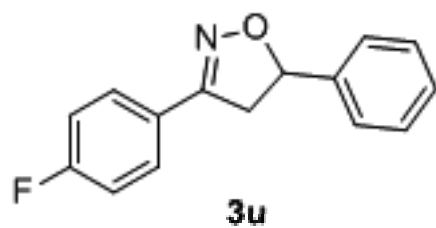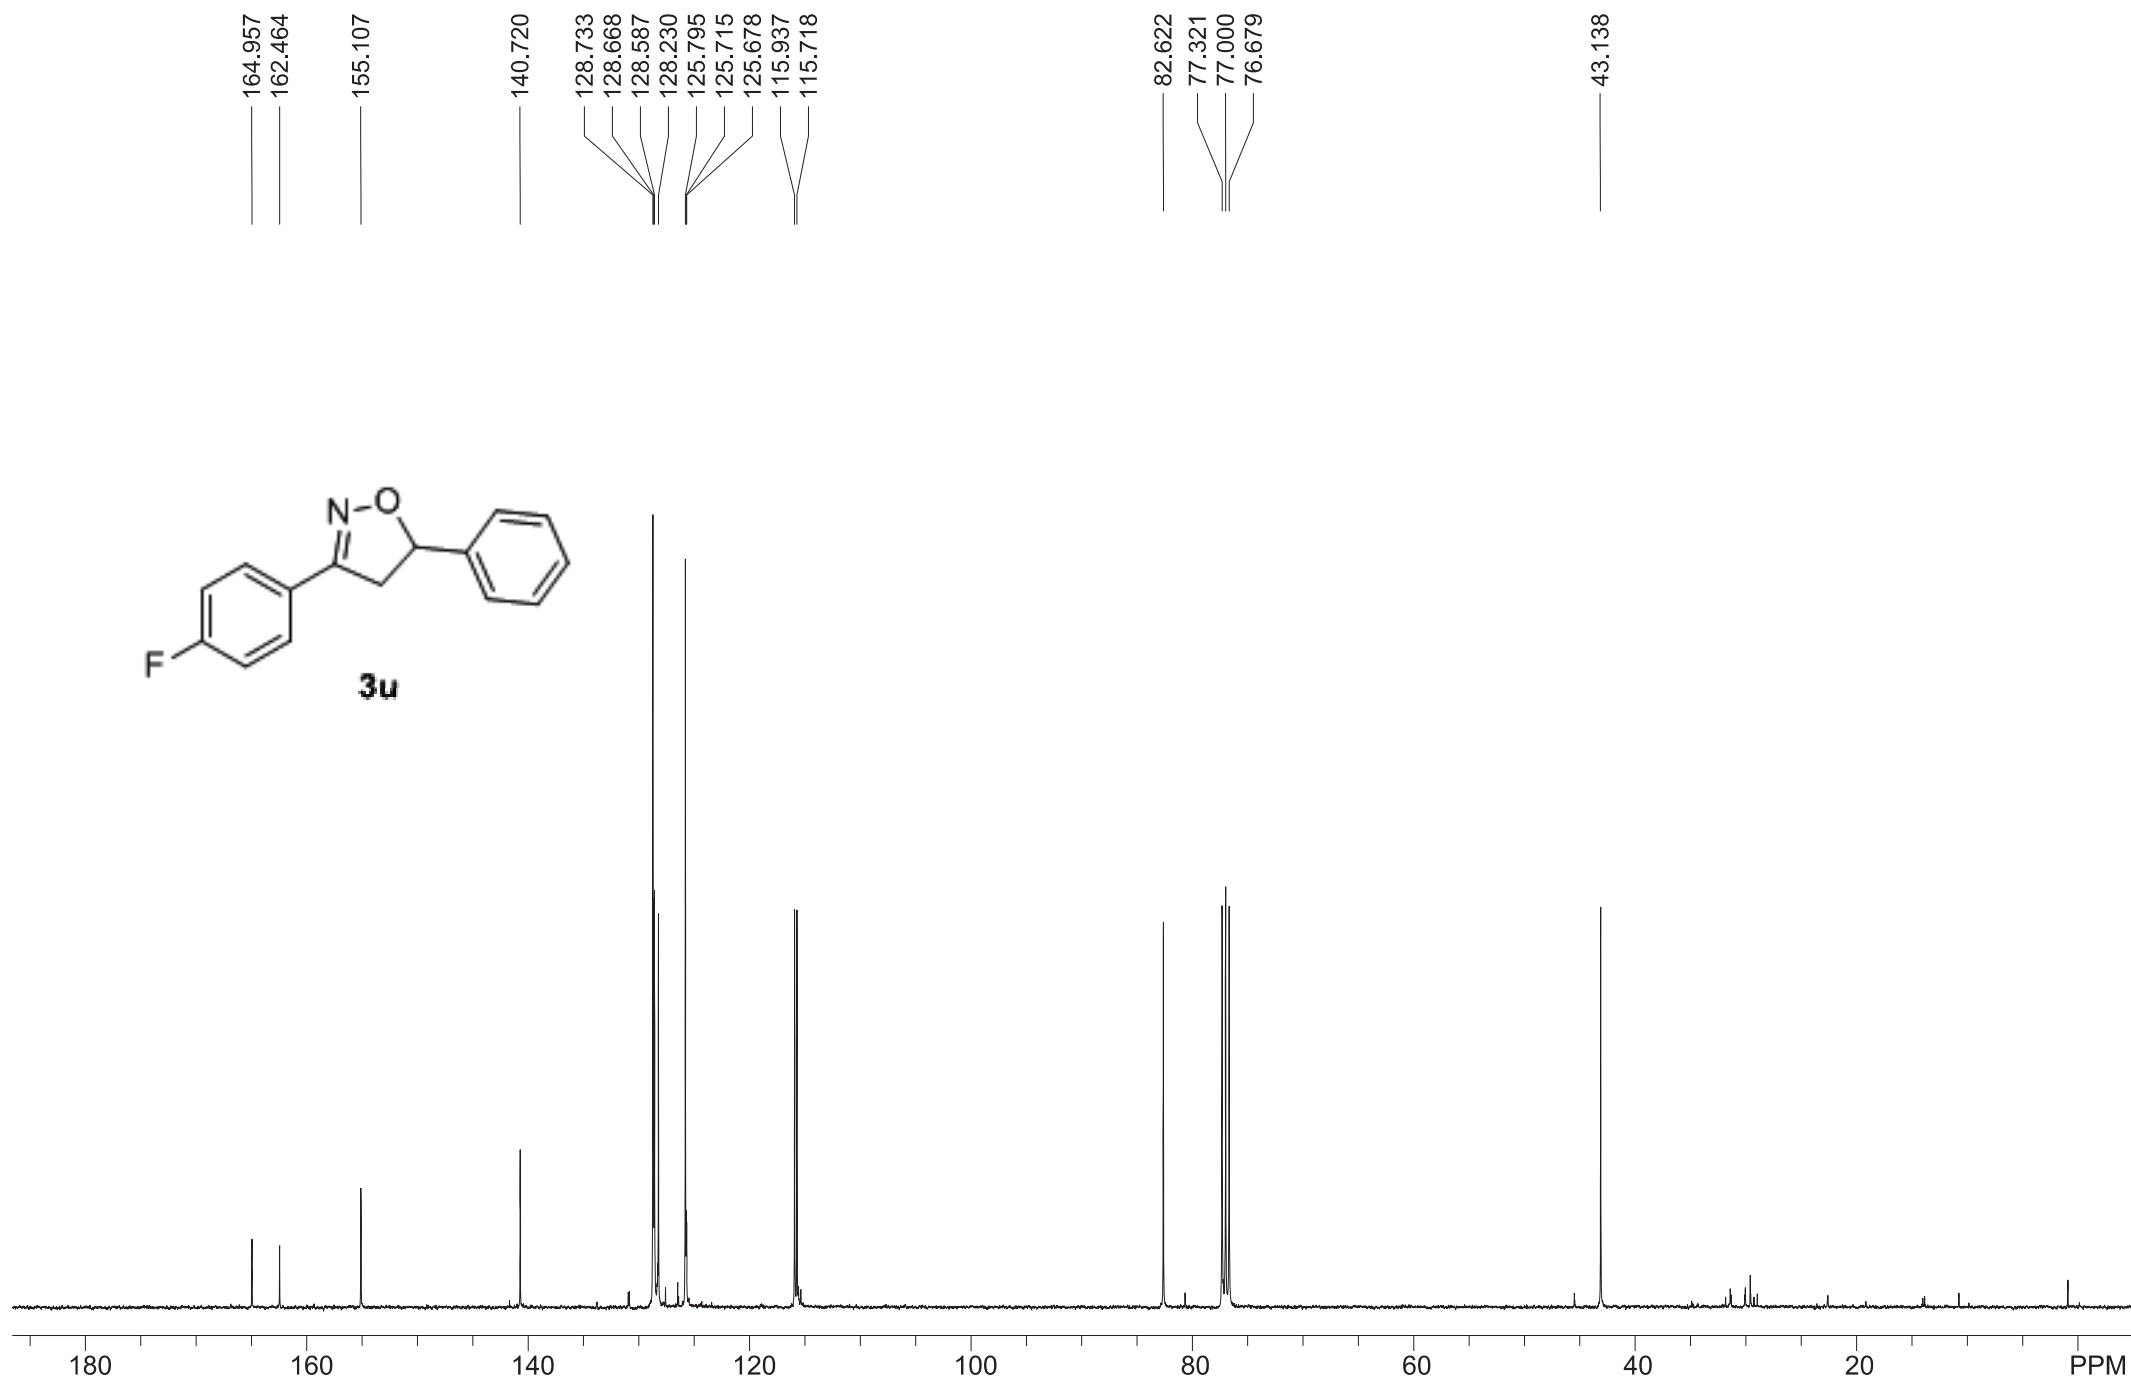

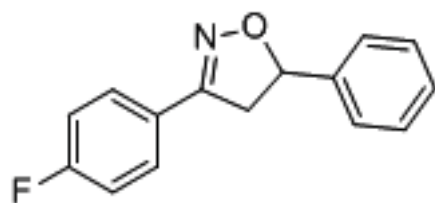

**3u**

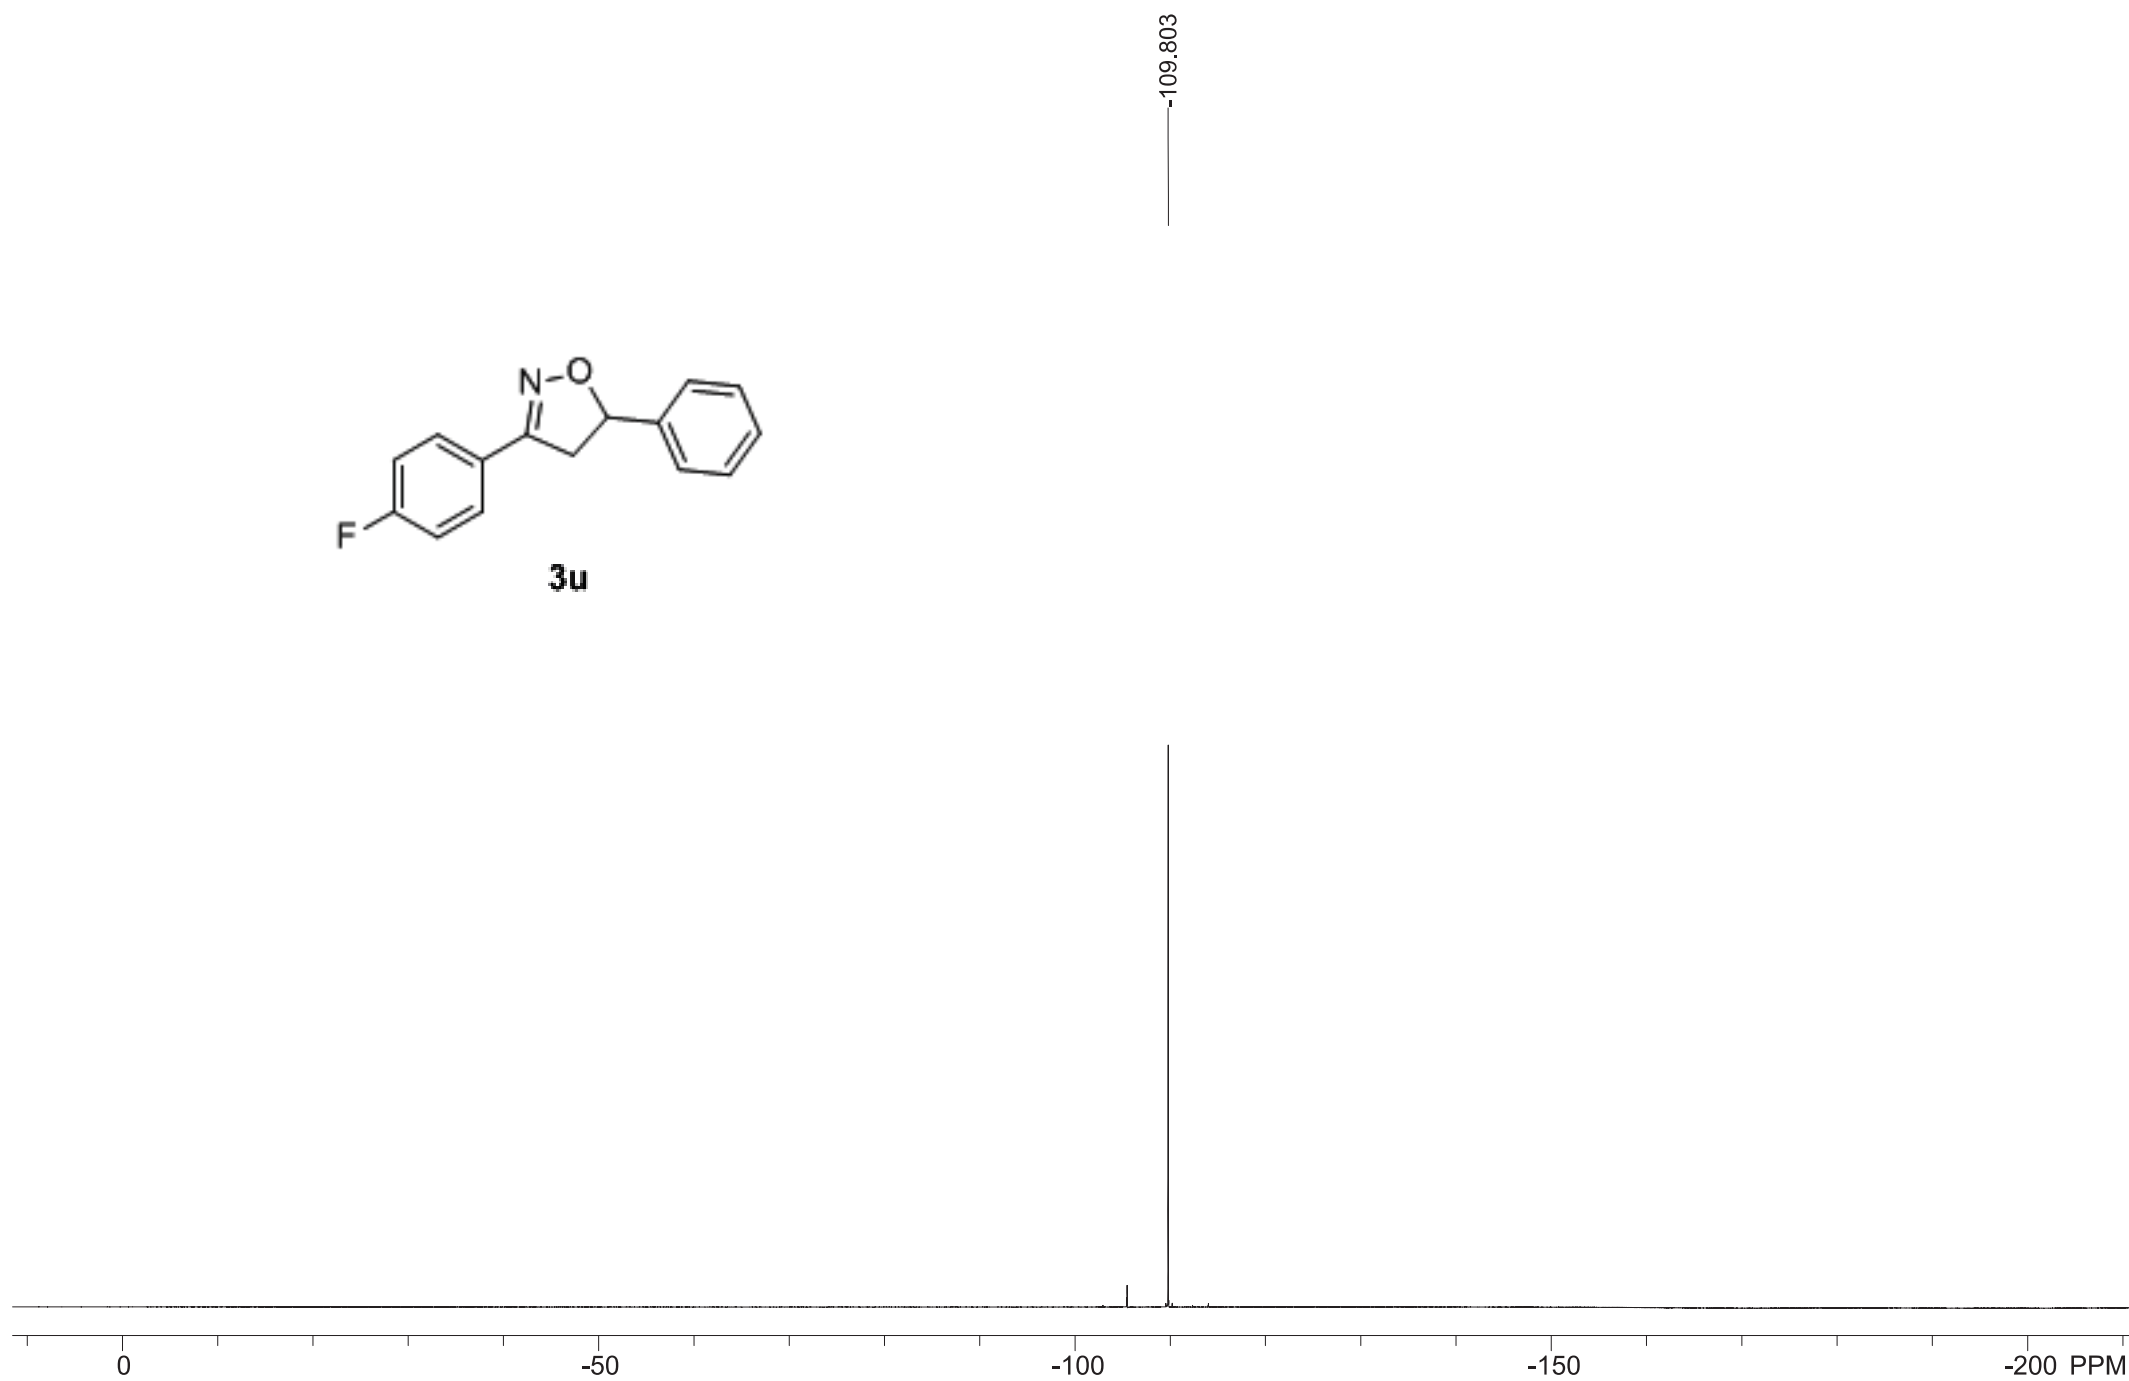

7.574  
7.550  
7.526  
7.391  
7.381  
7.360  
7.350  
7.340  
7.329  
7.320  
7.260

5.776  
5.755  
5.749  
5.727

3.785  
3.757  
3.743  
3.715  
3.346  
3.325  
3.304  
3.283

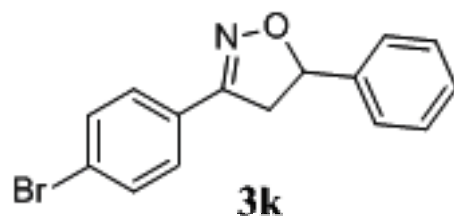

5.08  
4.05

1.04

1.07

1.04

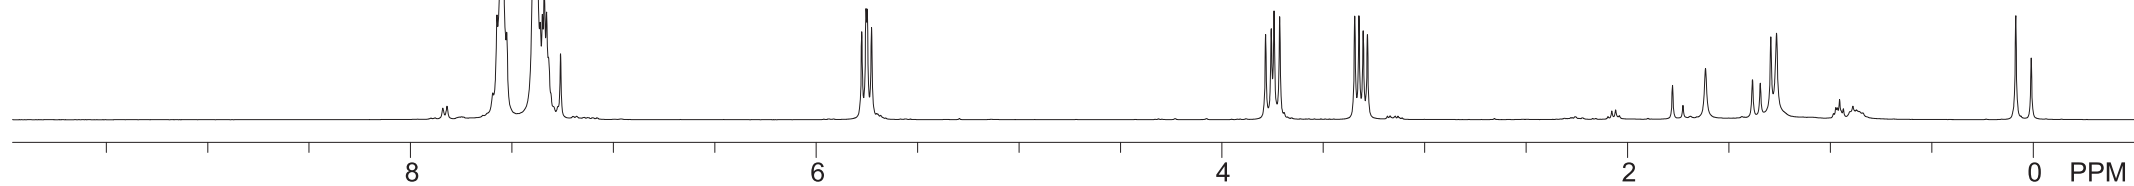

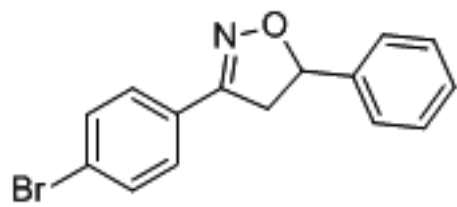

**3k**

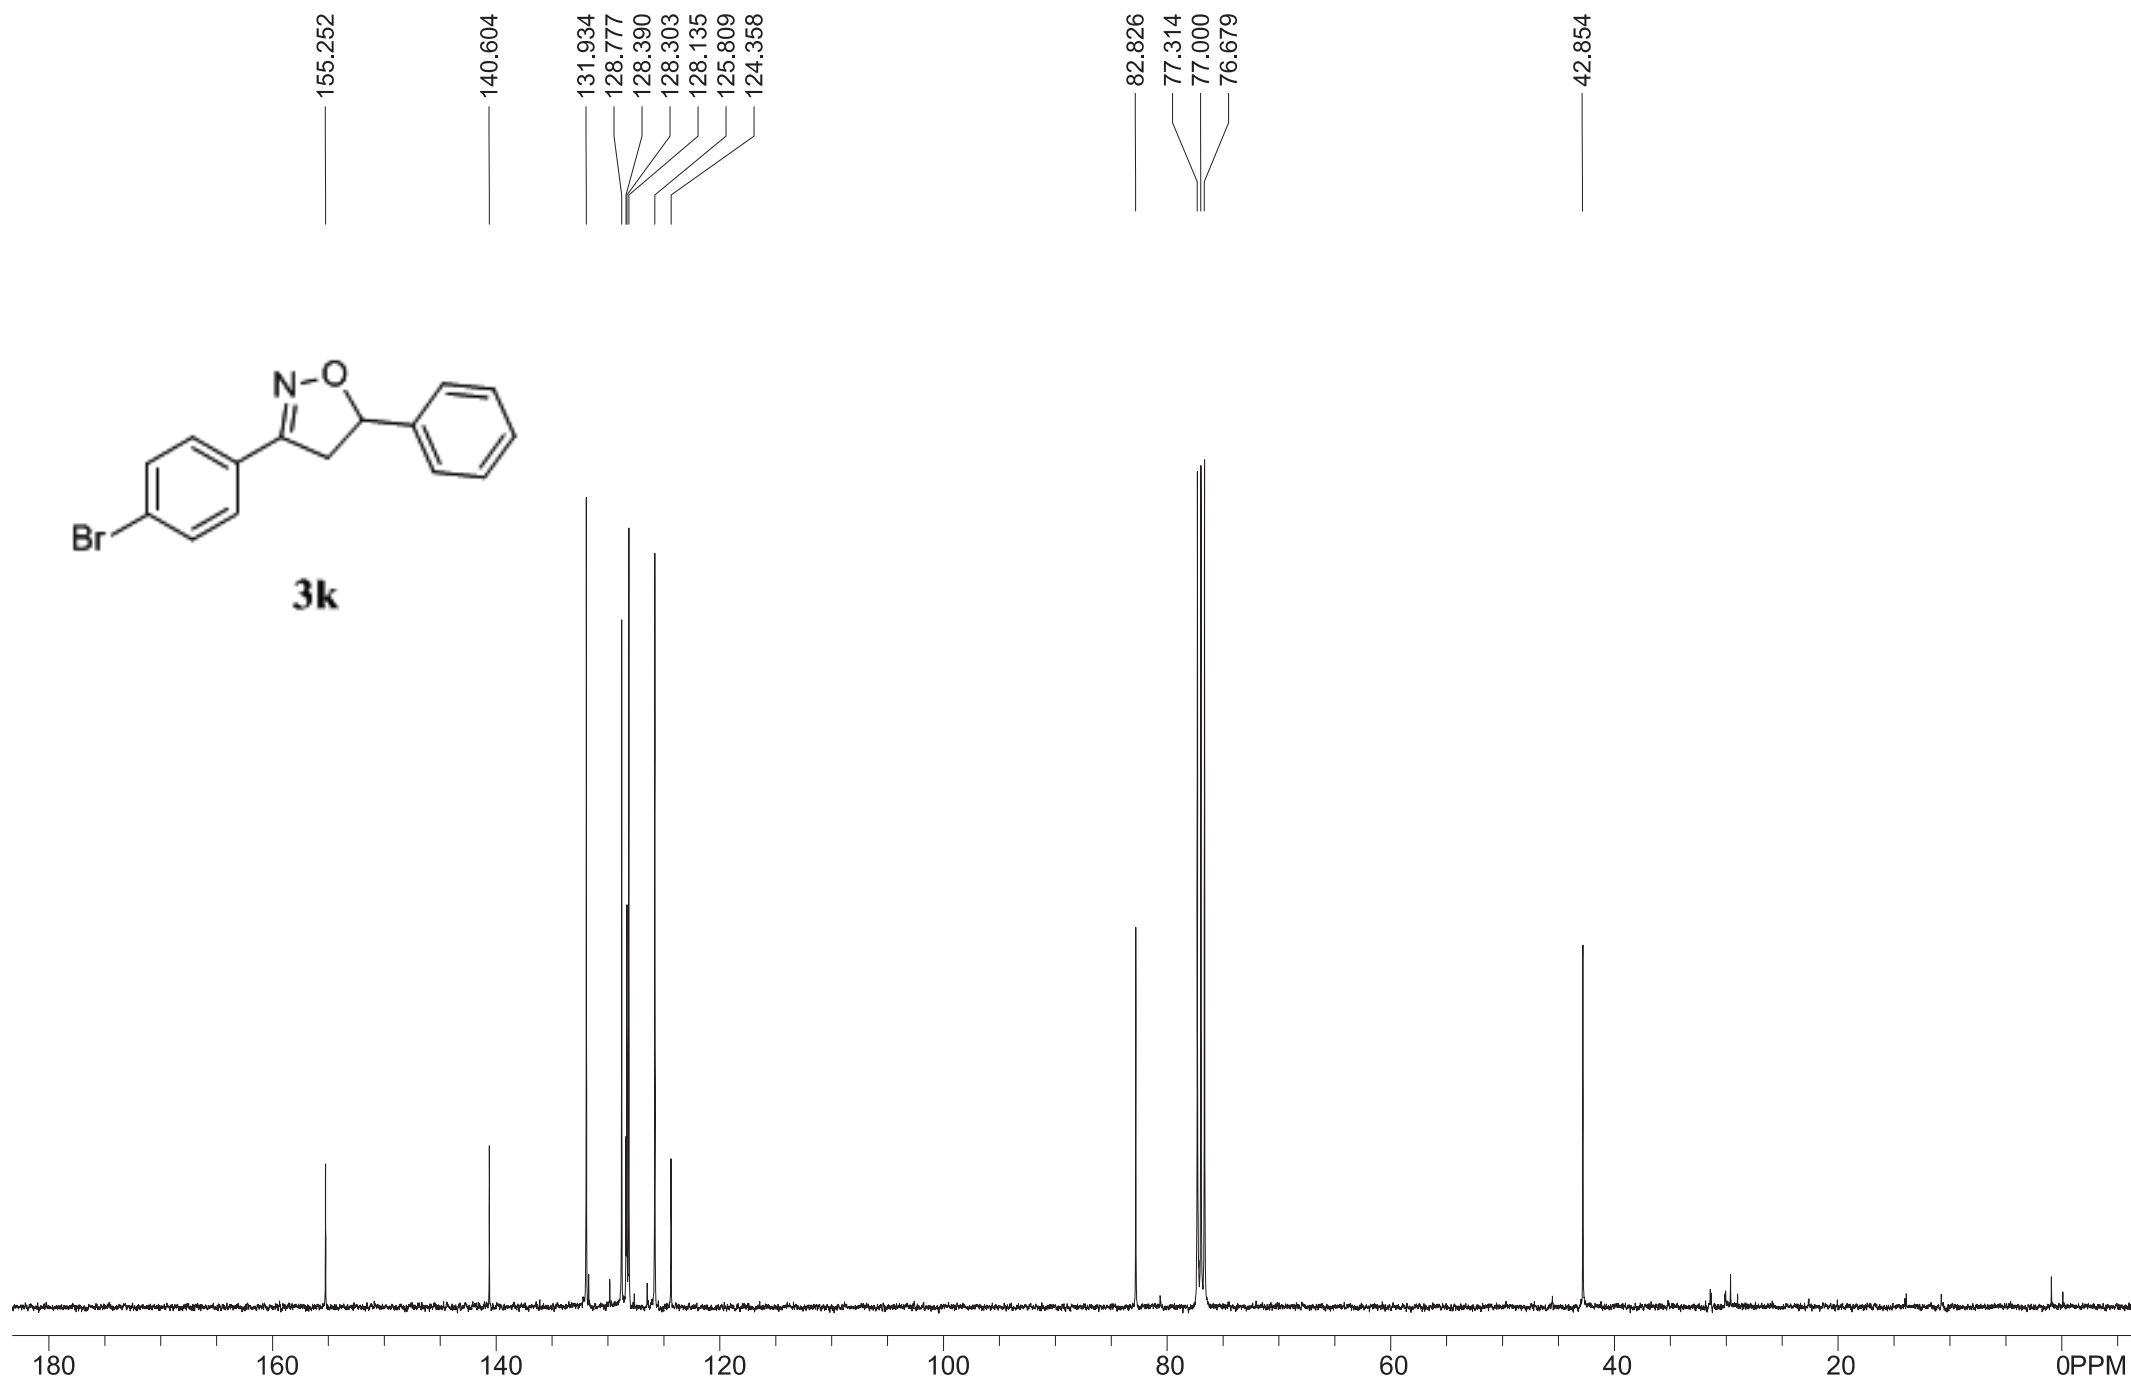



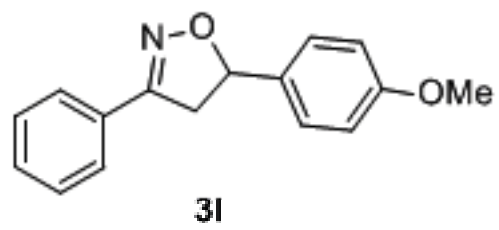

7.708  
 7.702  
 7.420  
 7.416  
 7.334  
 7.320  
 7.260  
 6.916  
 6.902

5.705  
 5.687  
 5.672

3.806  
 3.751  
 3.733  
 3.723  
 3.705  
 3.349  
 3.335  
 3.322  
 3.308

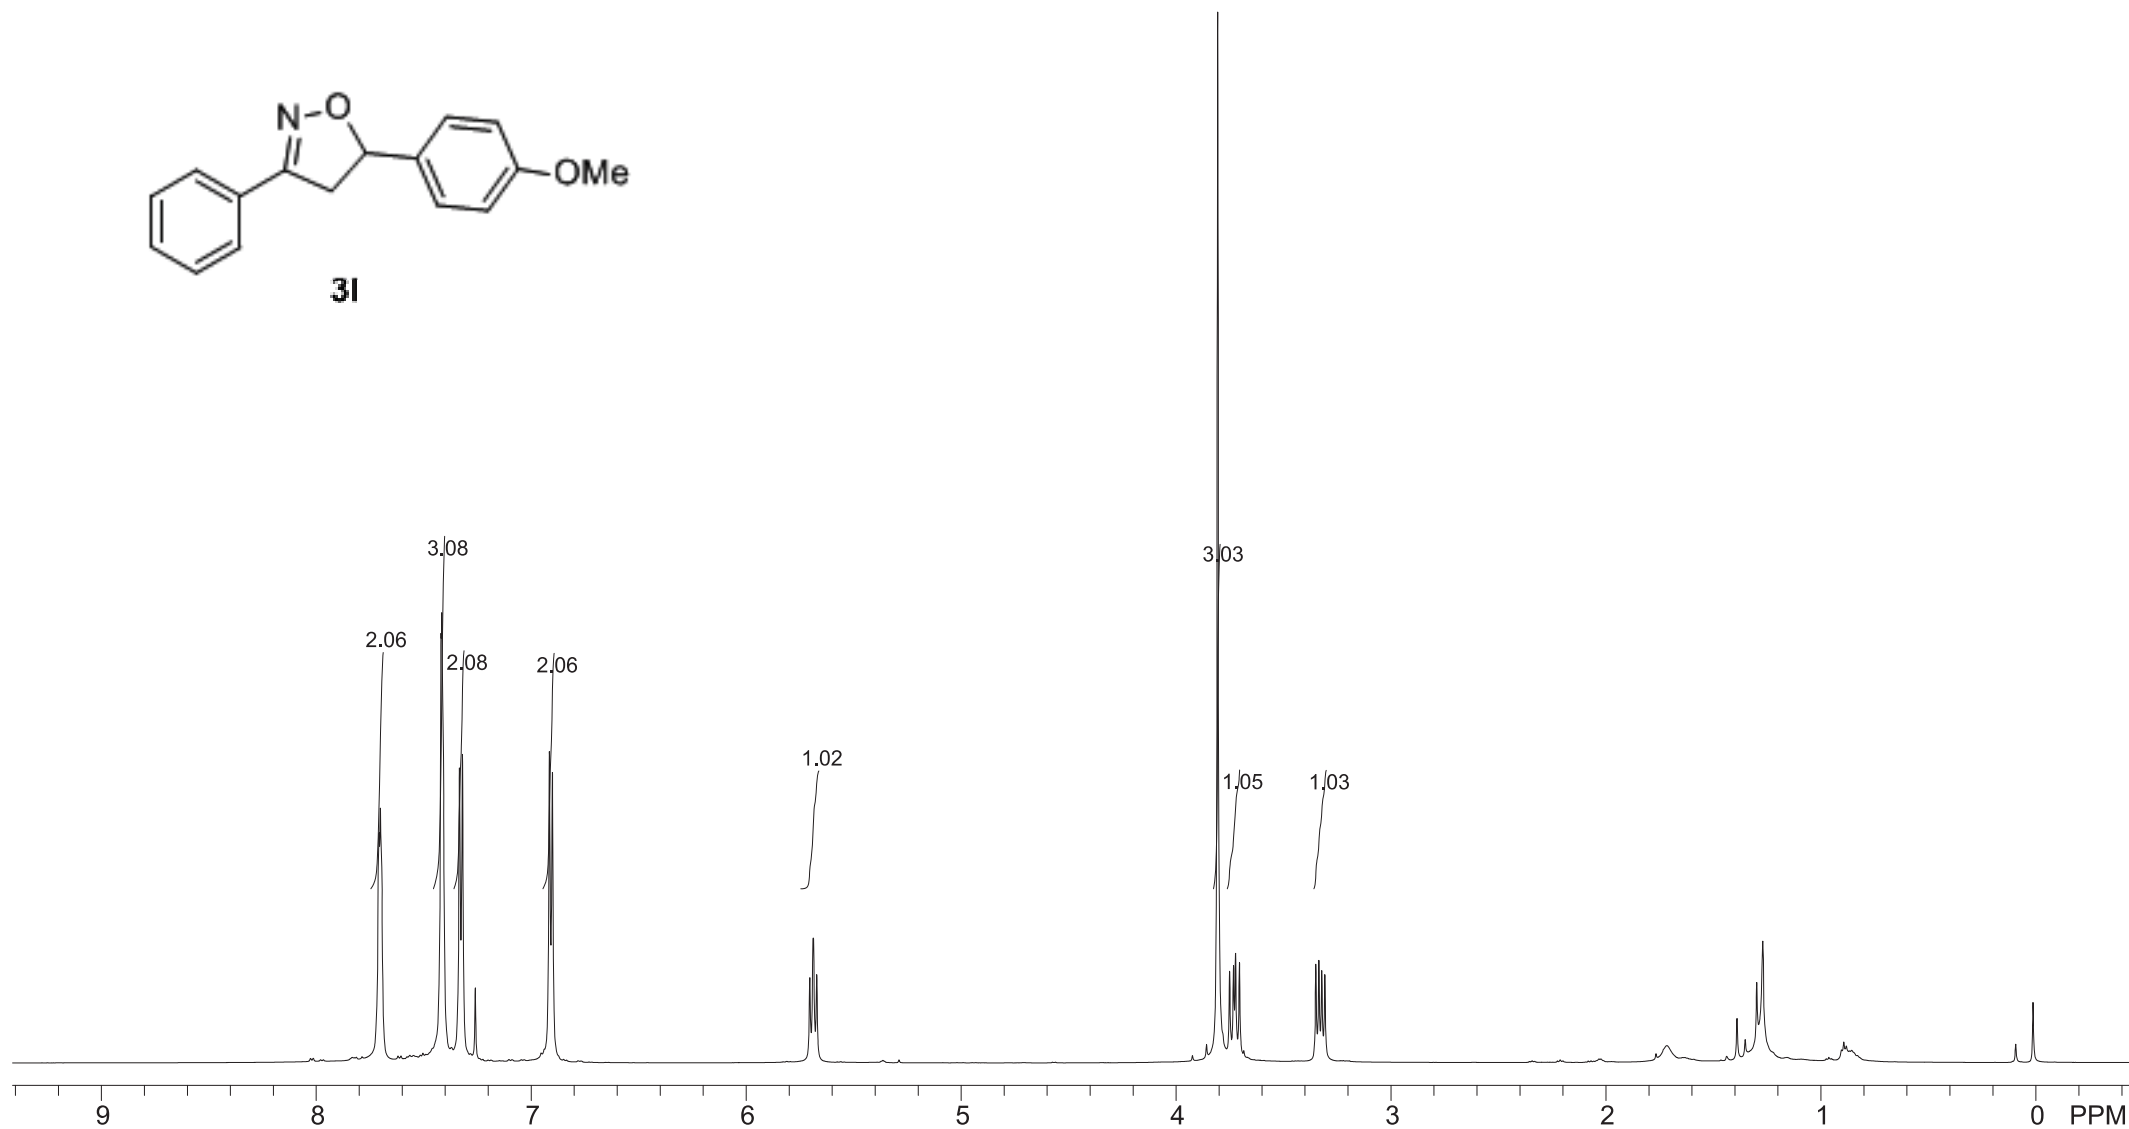

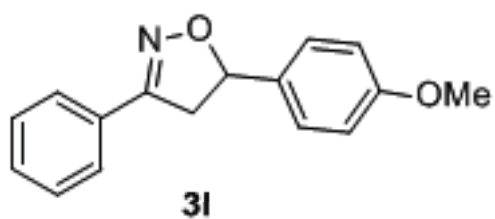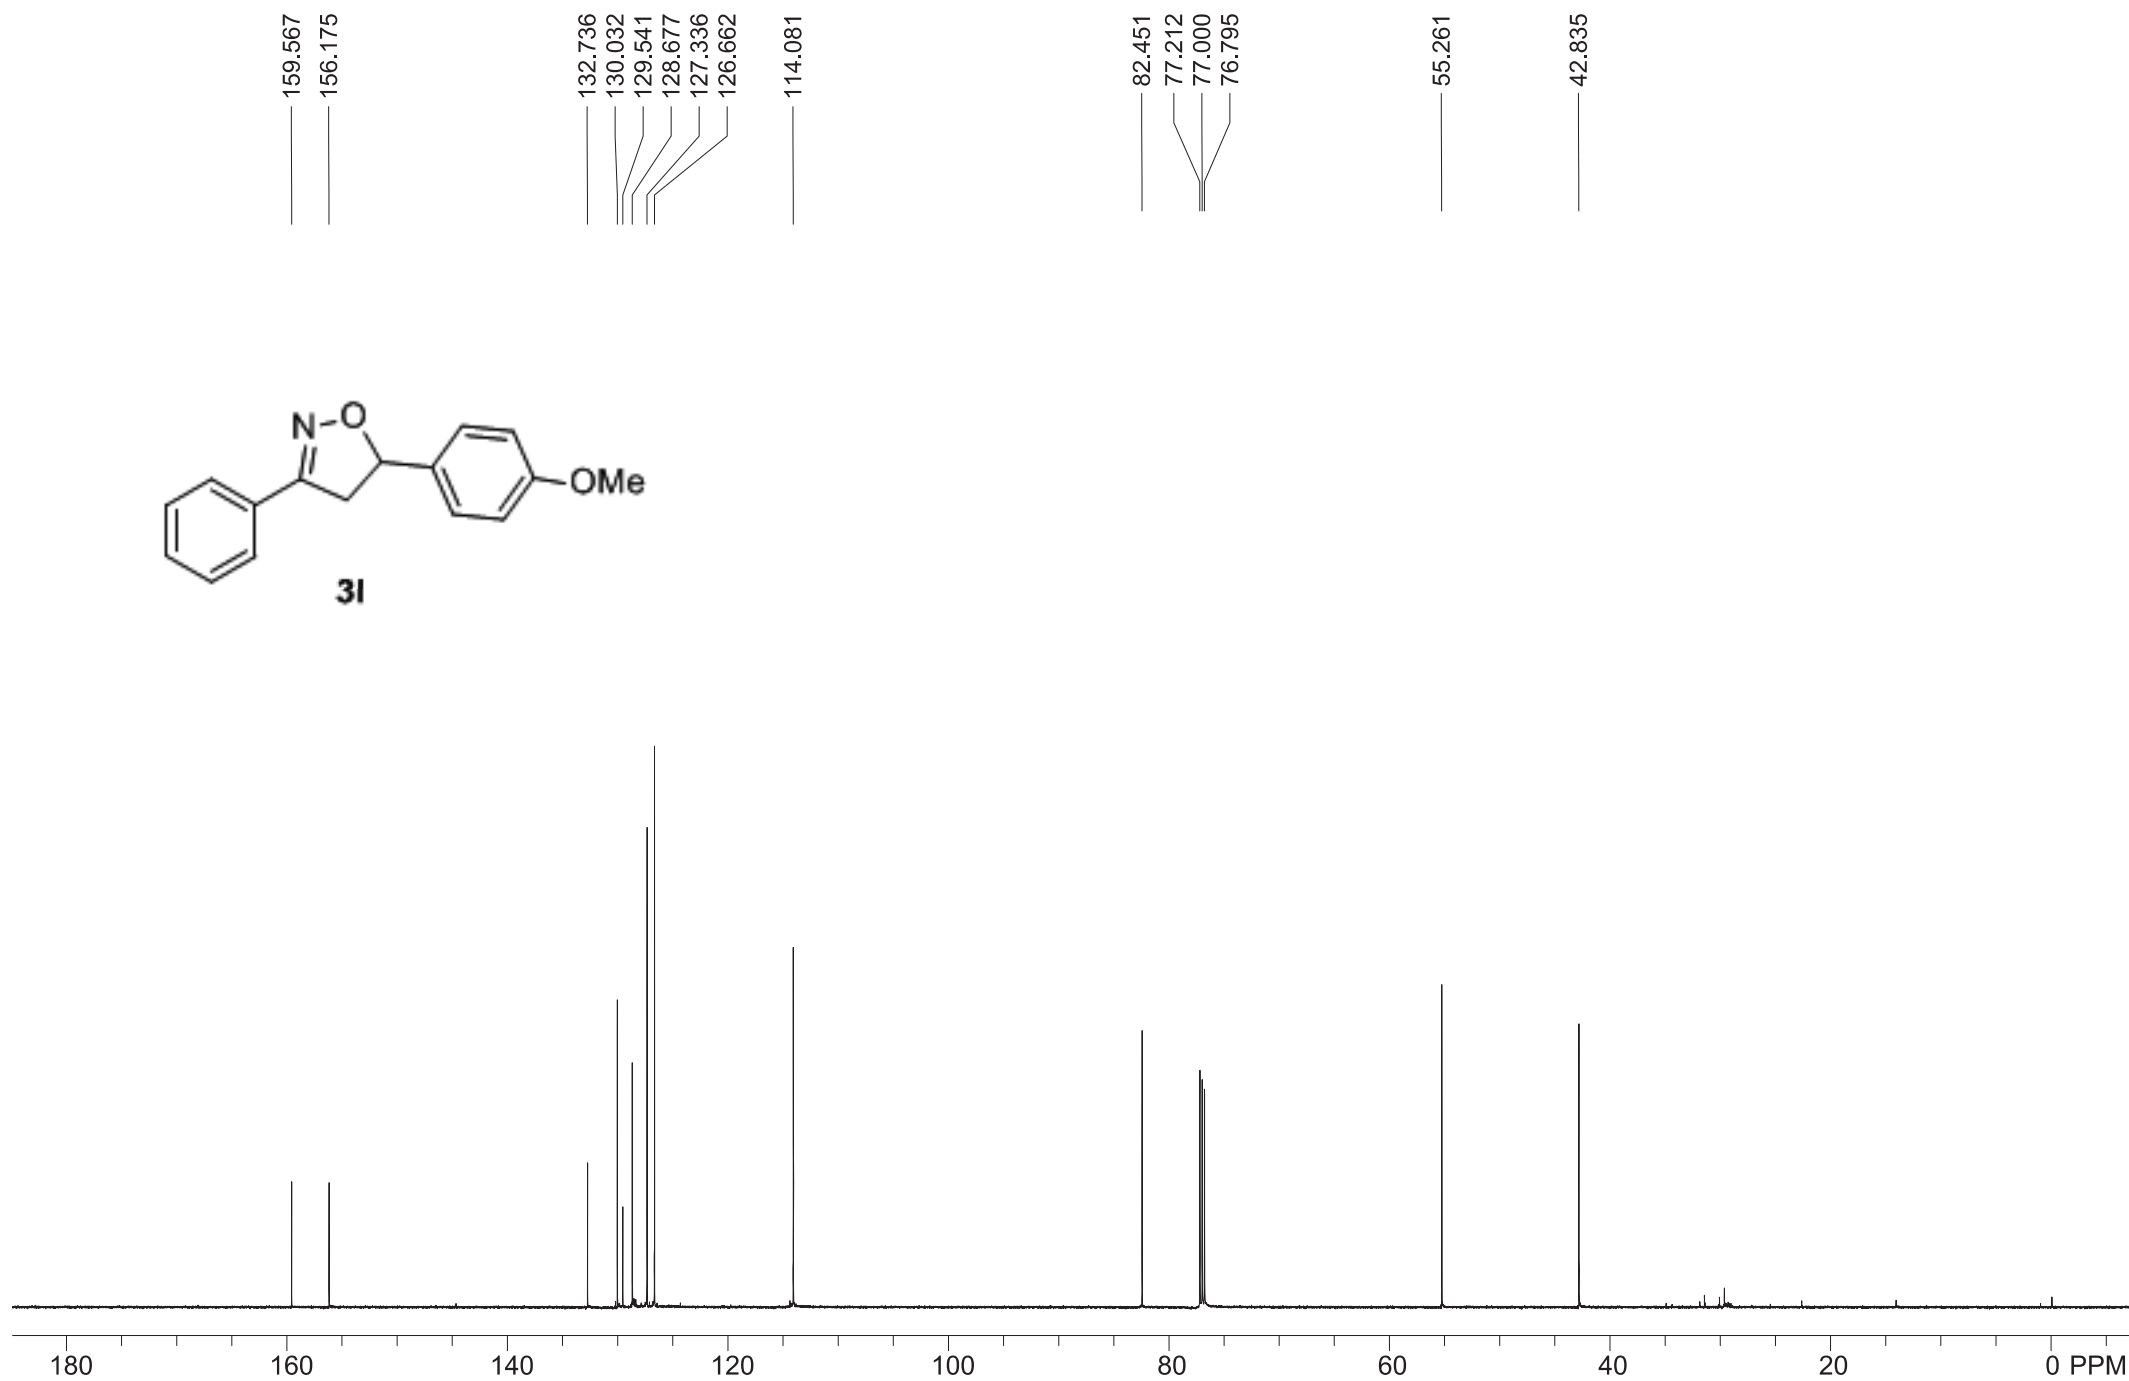

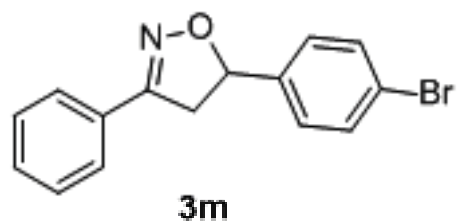

7.680  
 7.670  
 7.661  
 7.498  
 7.477  
 7.436  
 7.410  
 7.407  
 7.397  
 7.270  
 7.249

5.706  
 5.686  
 5.679  
 5.659

3.807  
 3.780  
 3.766  
 3.738  
 3.308  
 3.288  
 3.267  
 3.246

-0.000

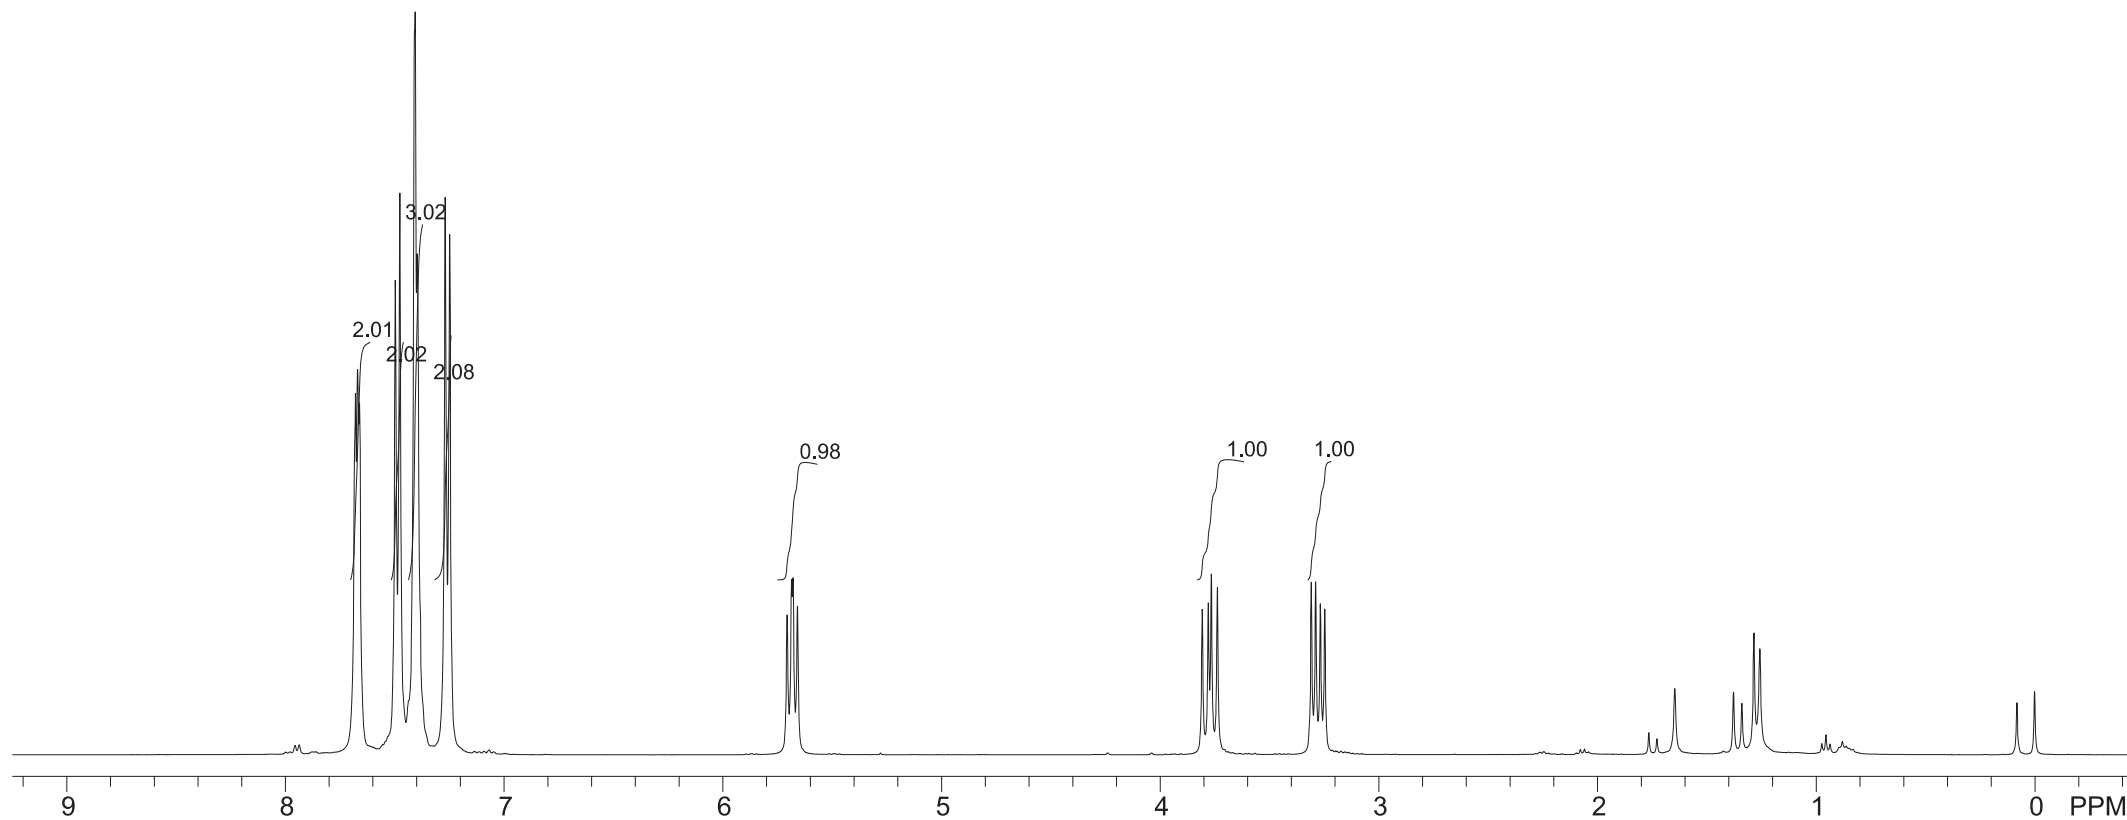

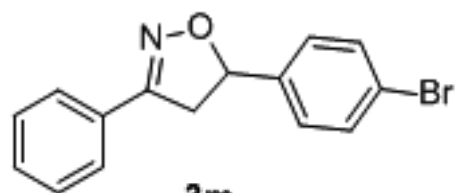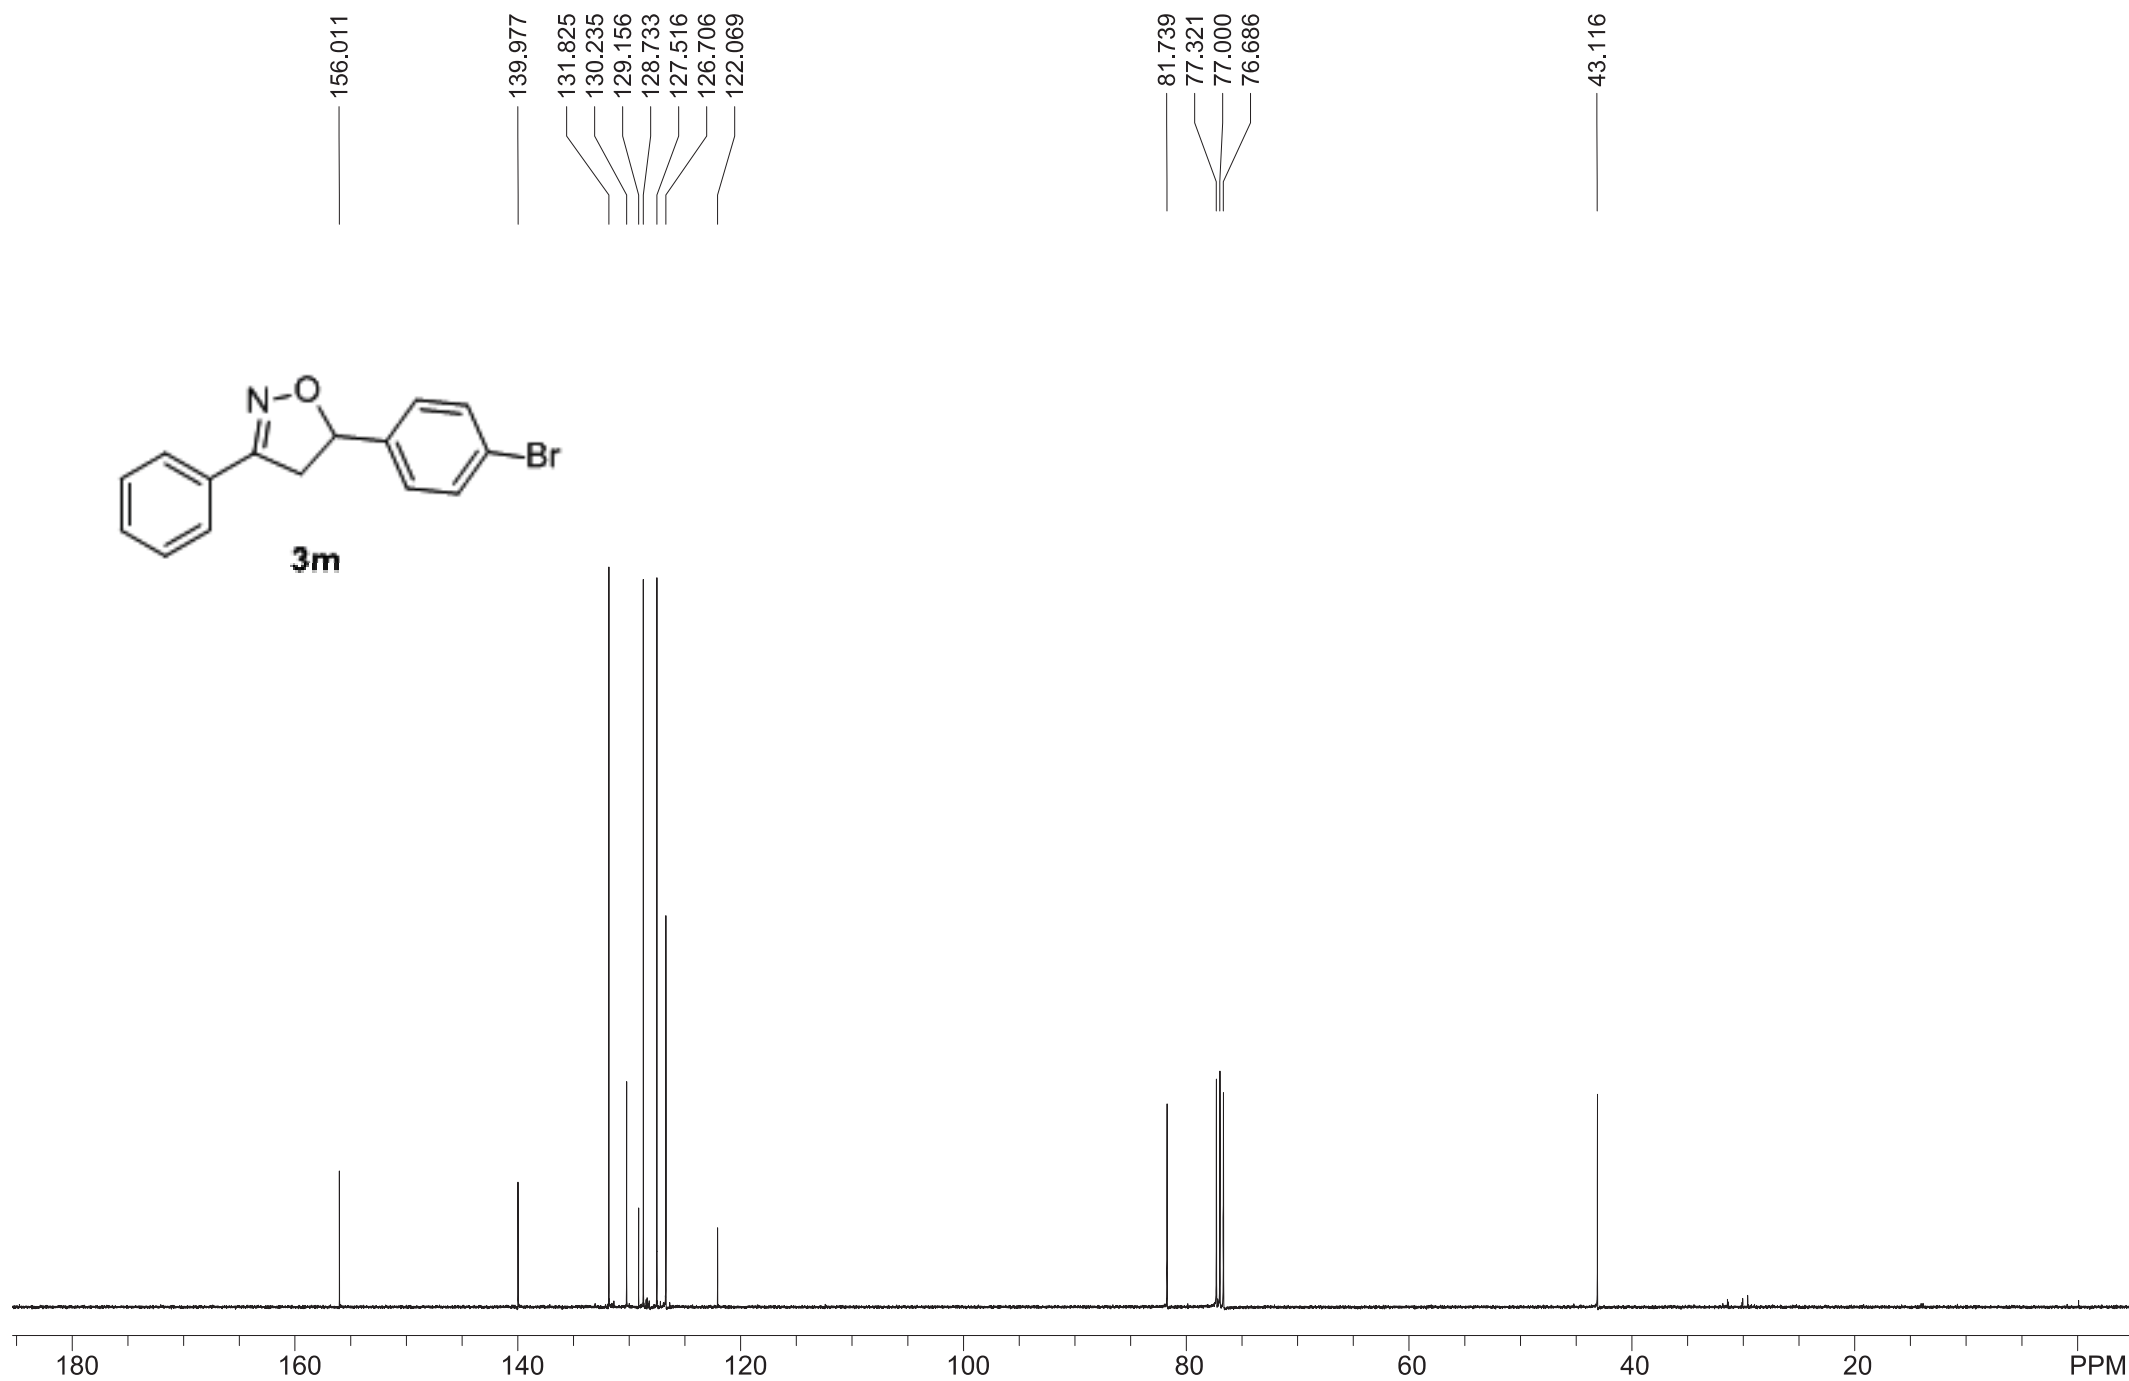

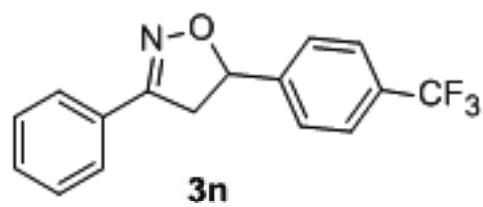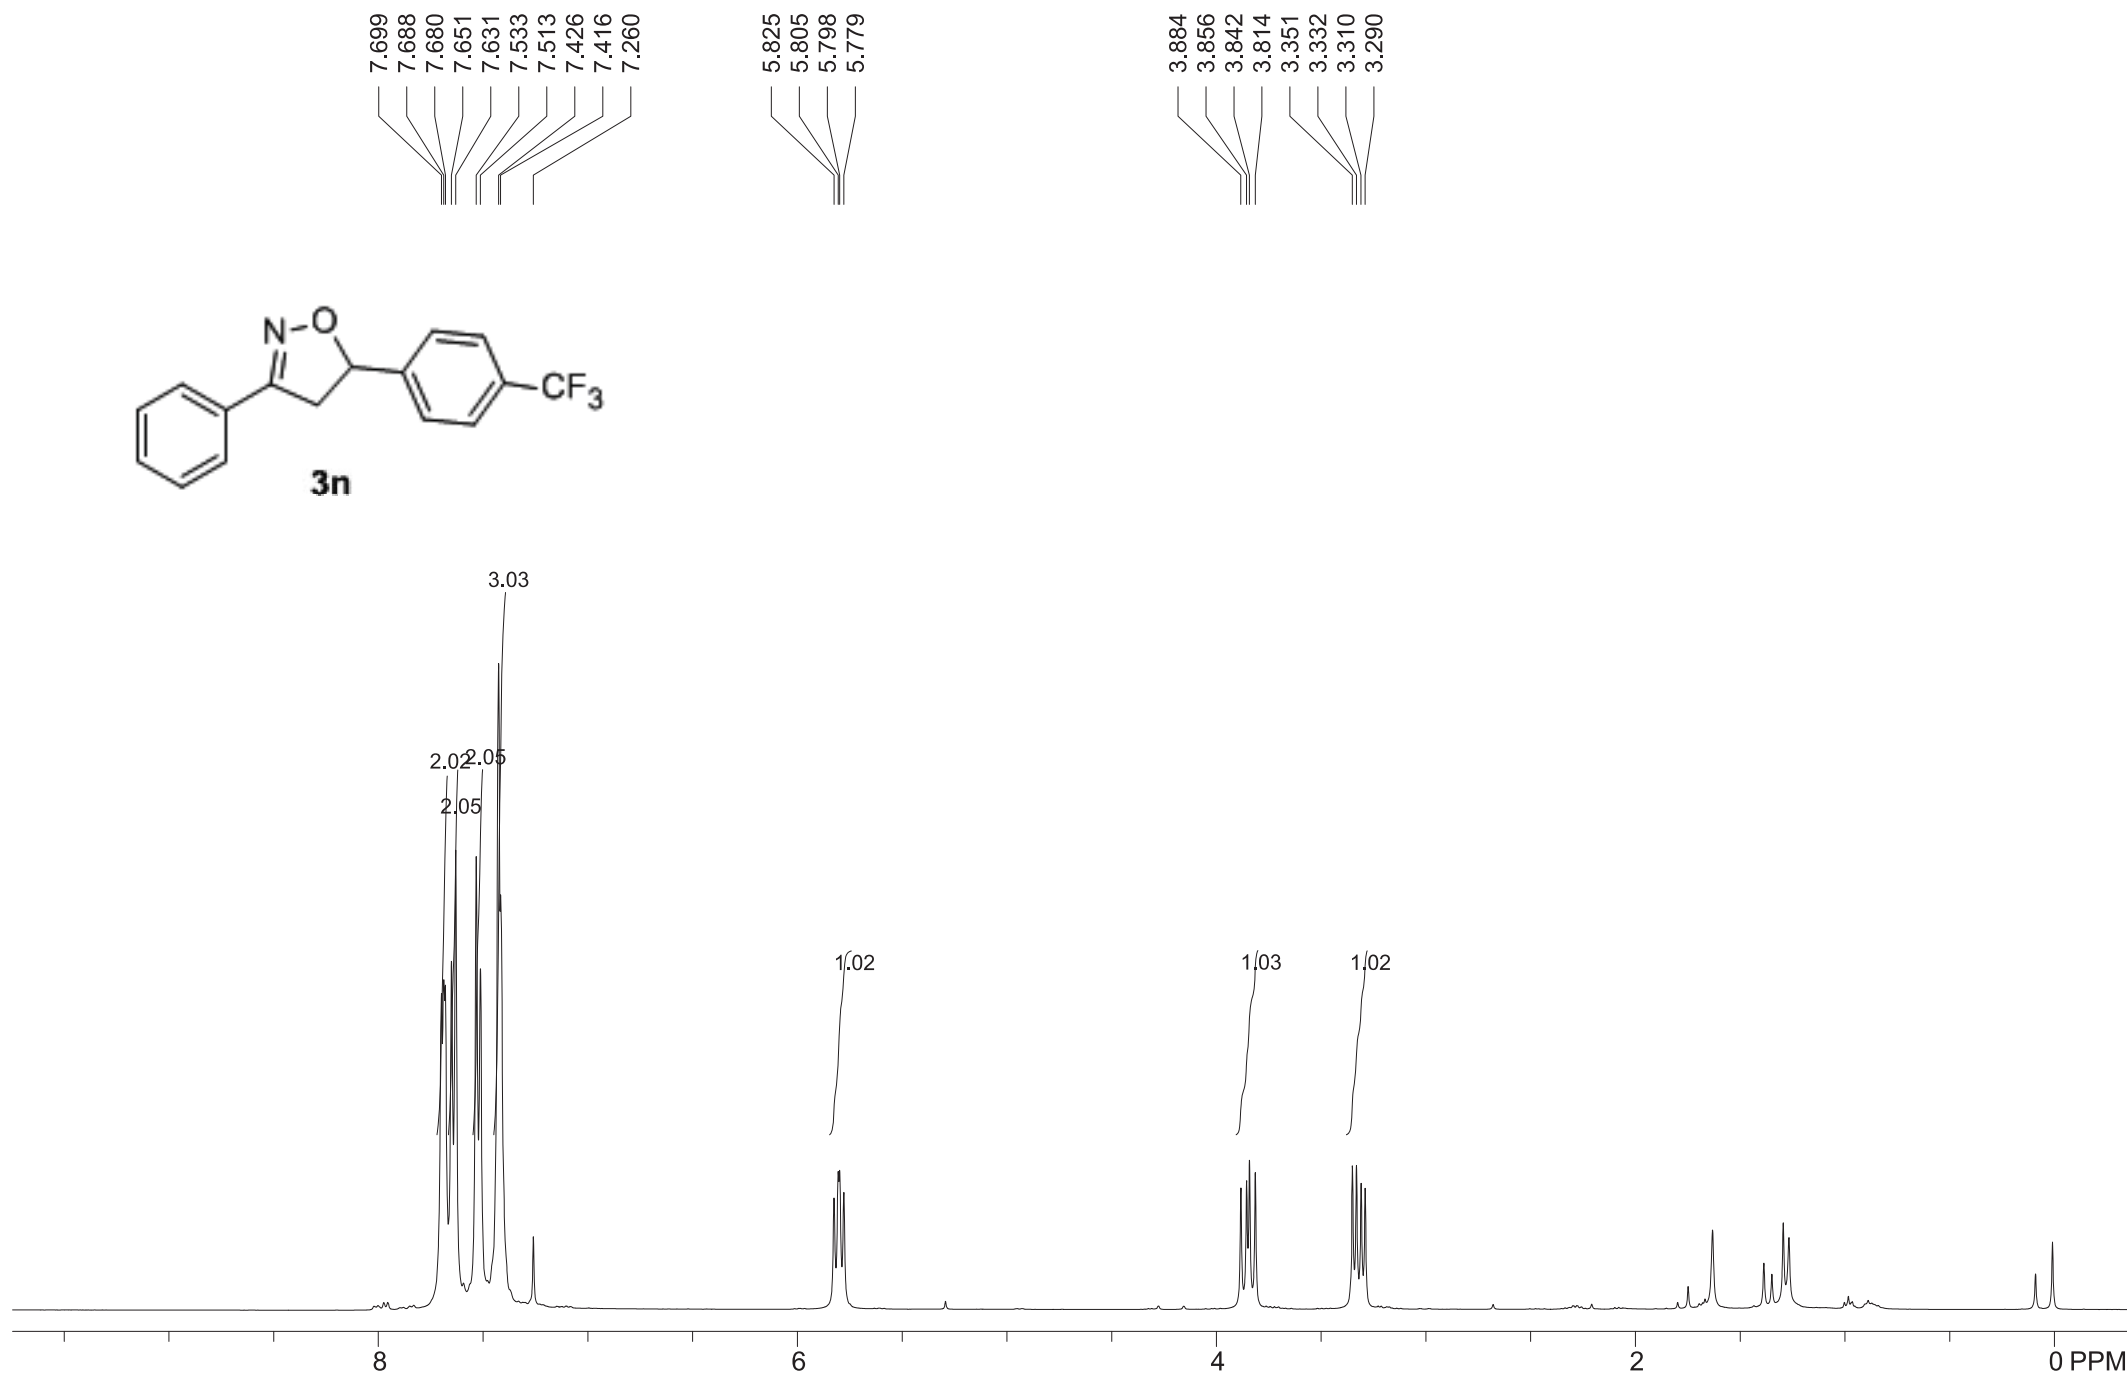

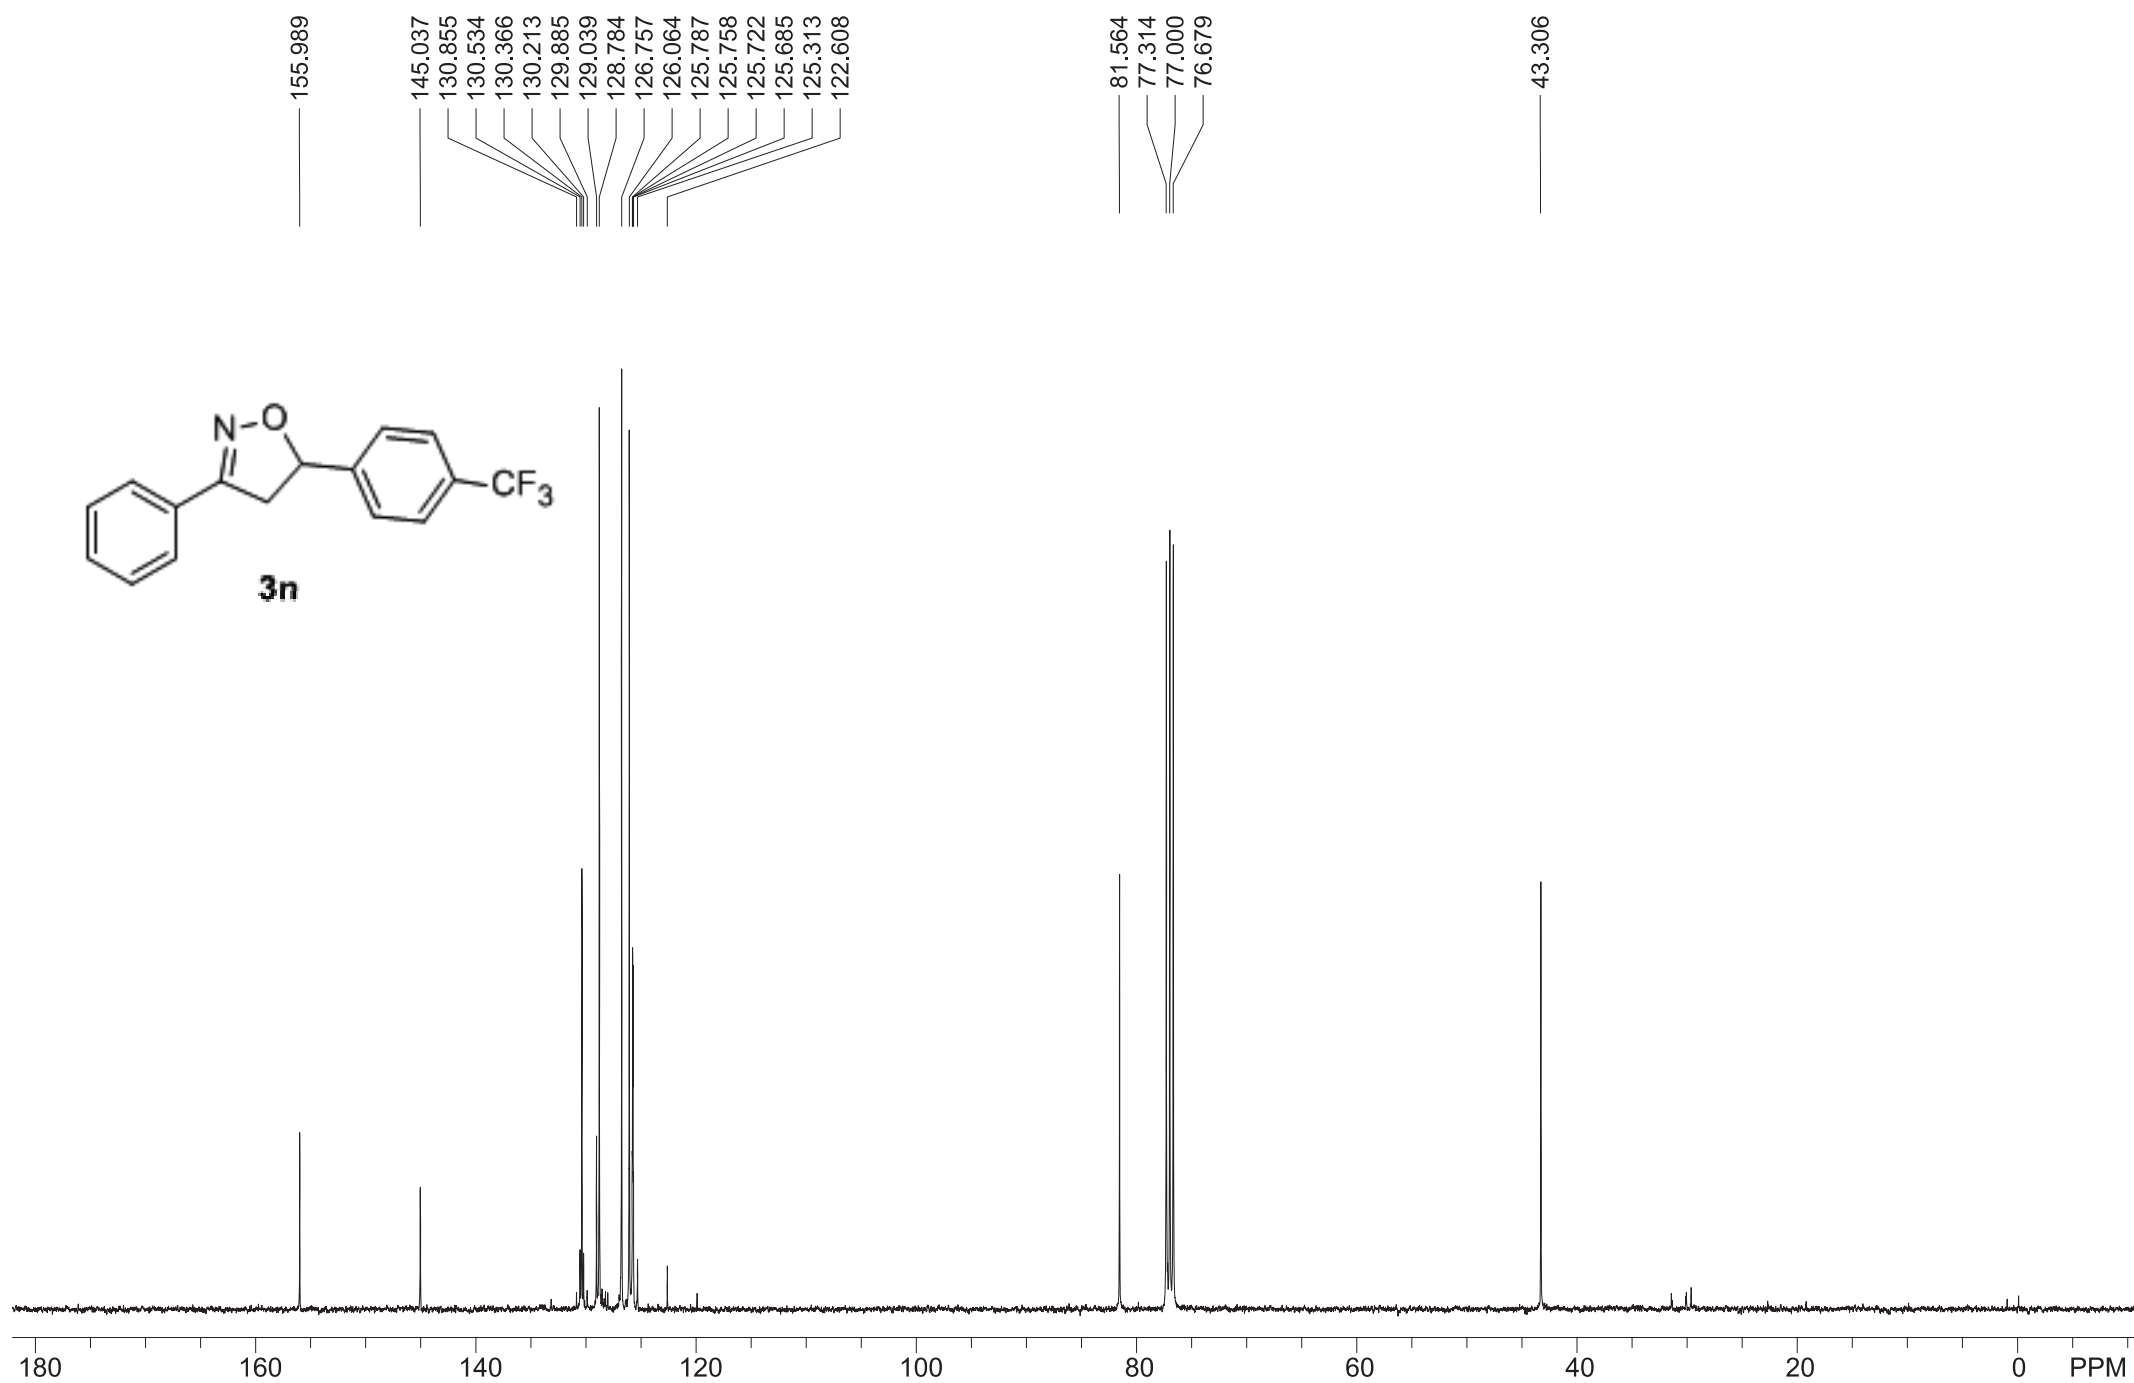

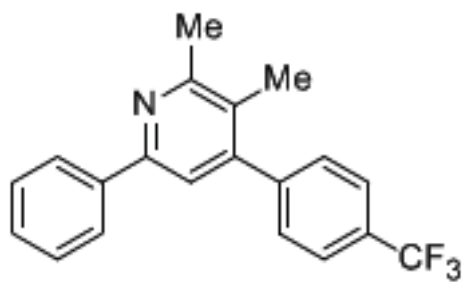

**3n**

62.562

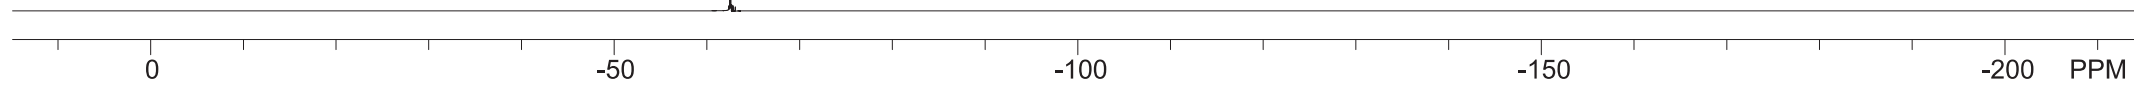

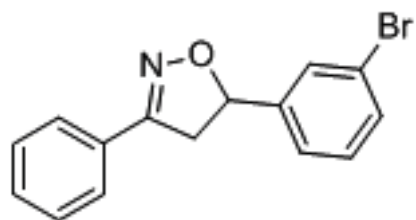

**3p**

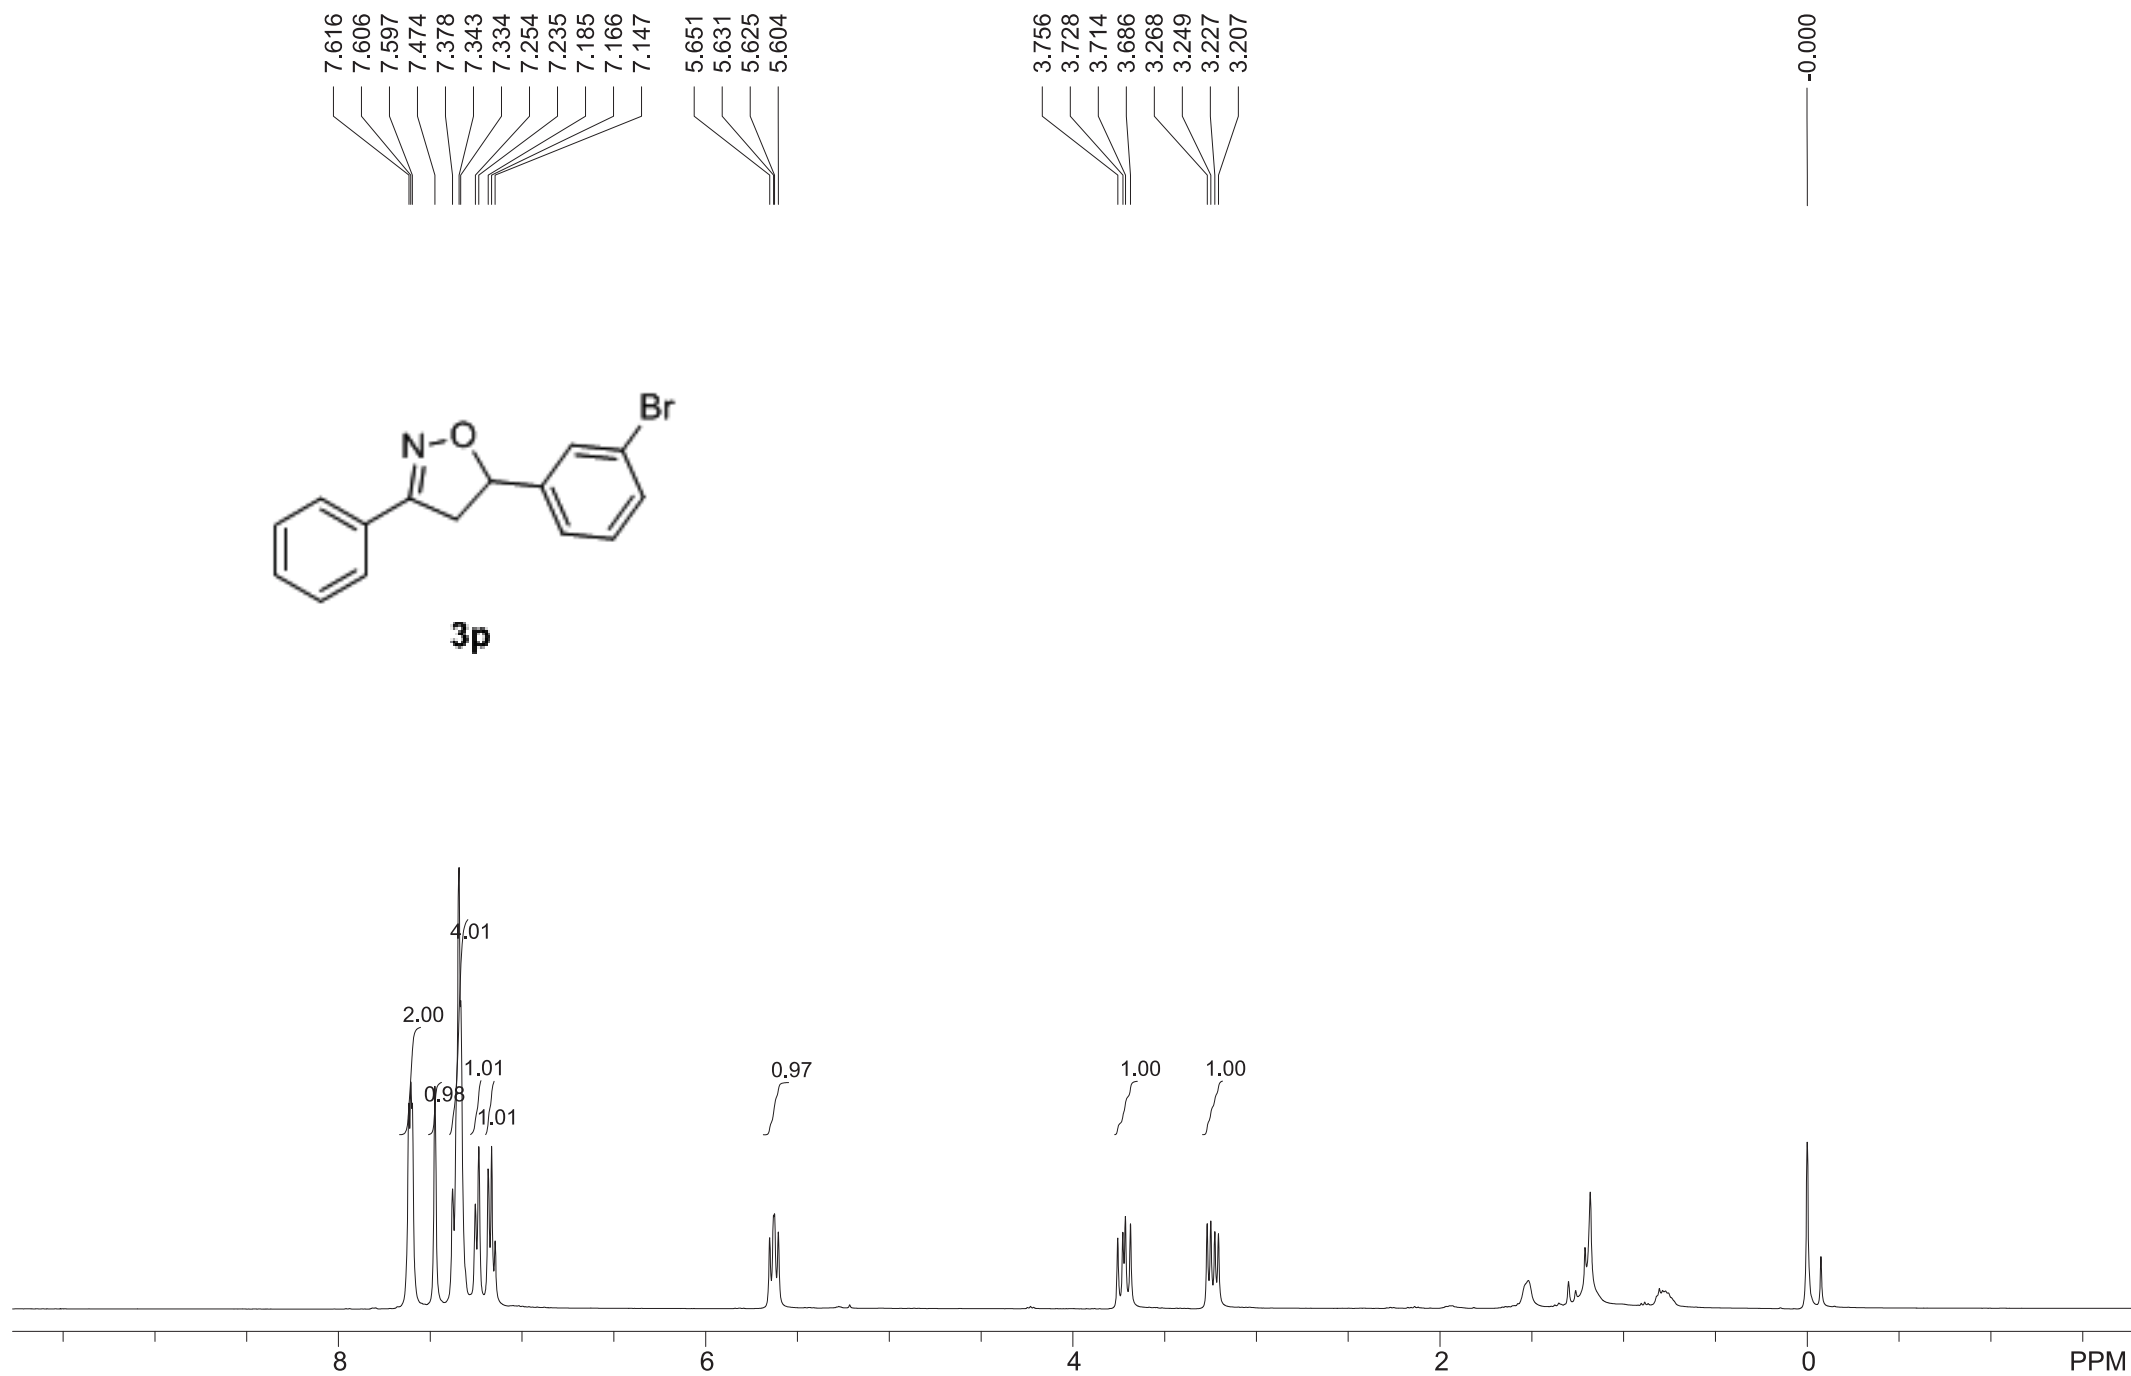



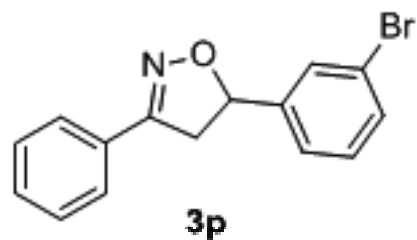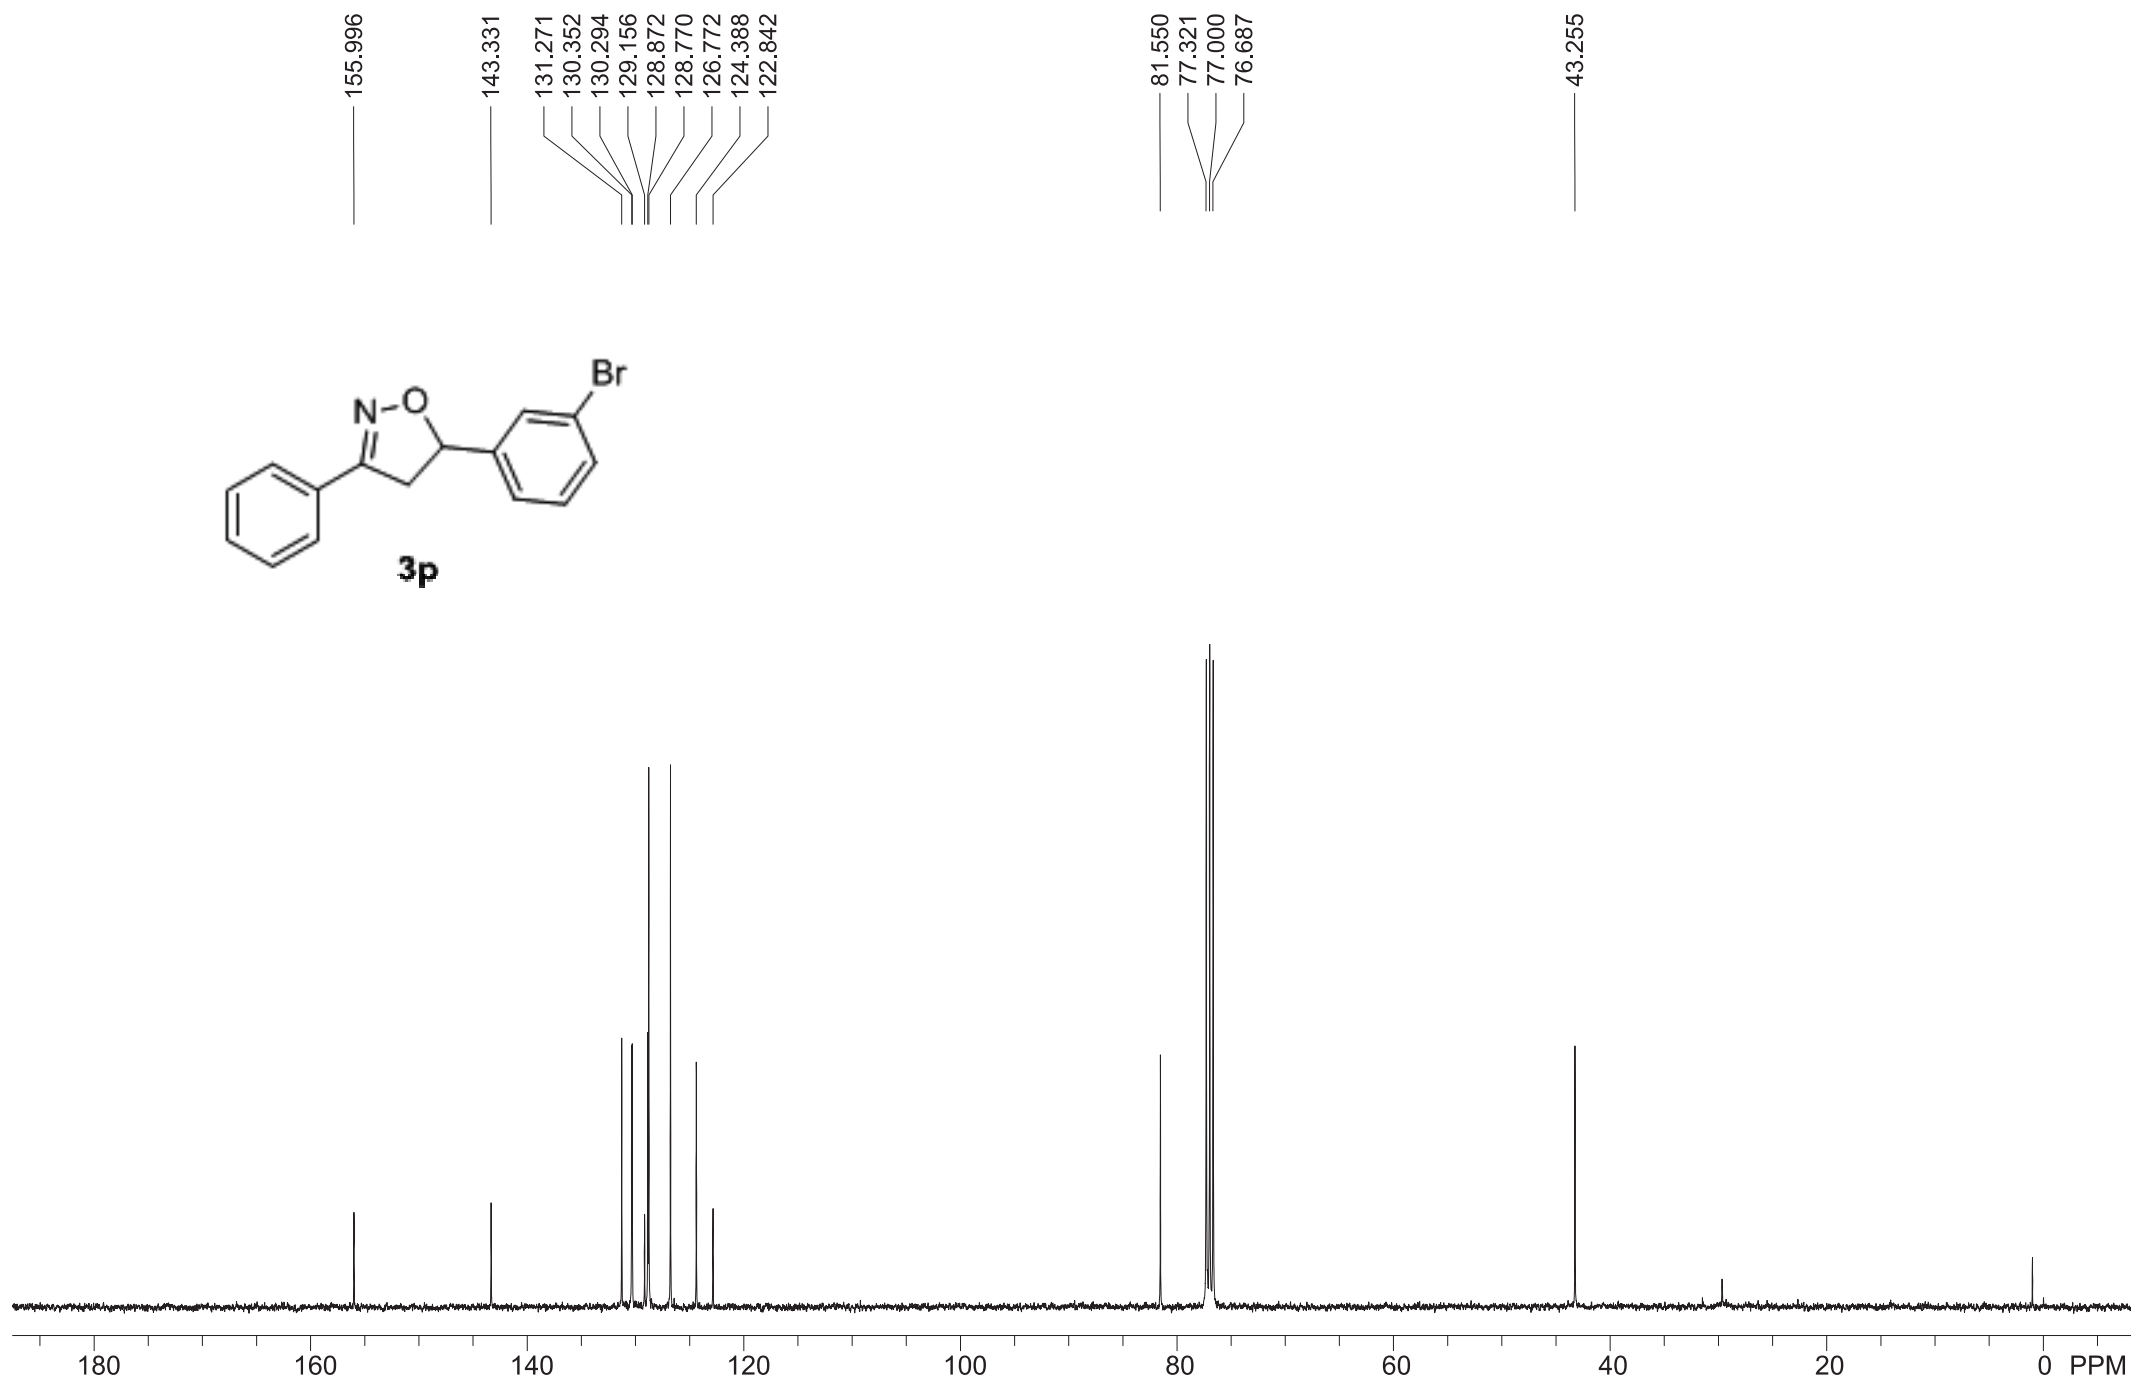

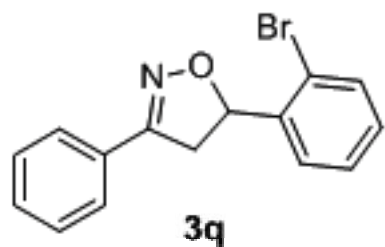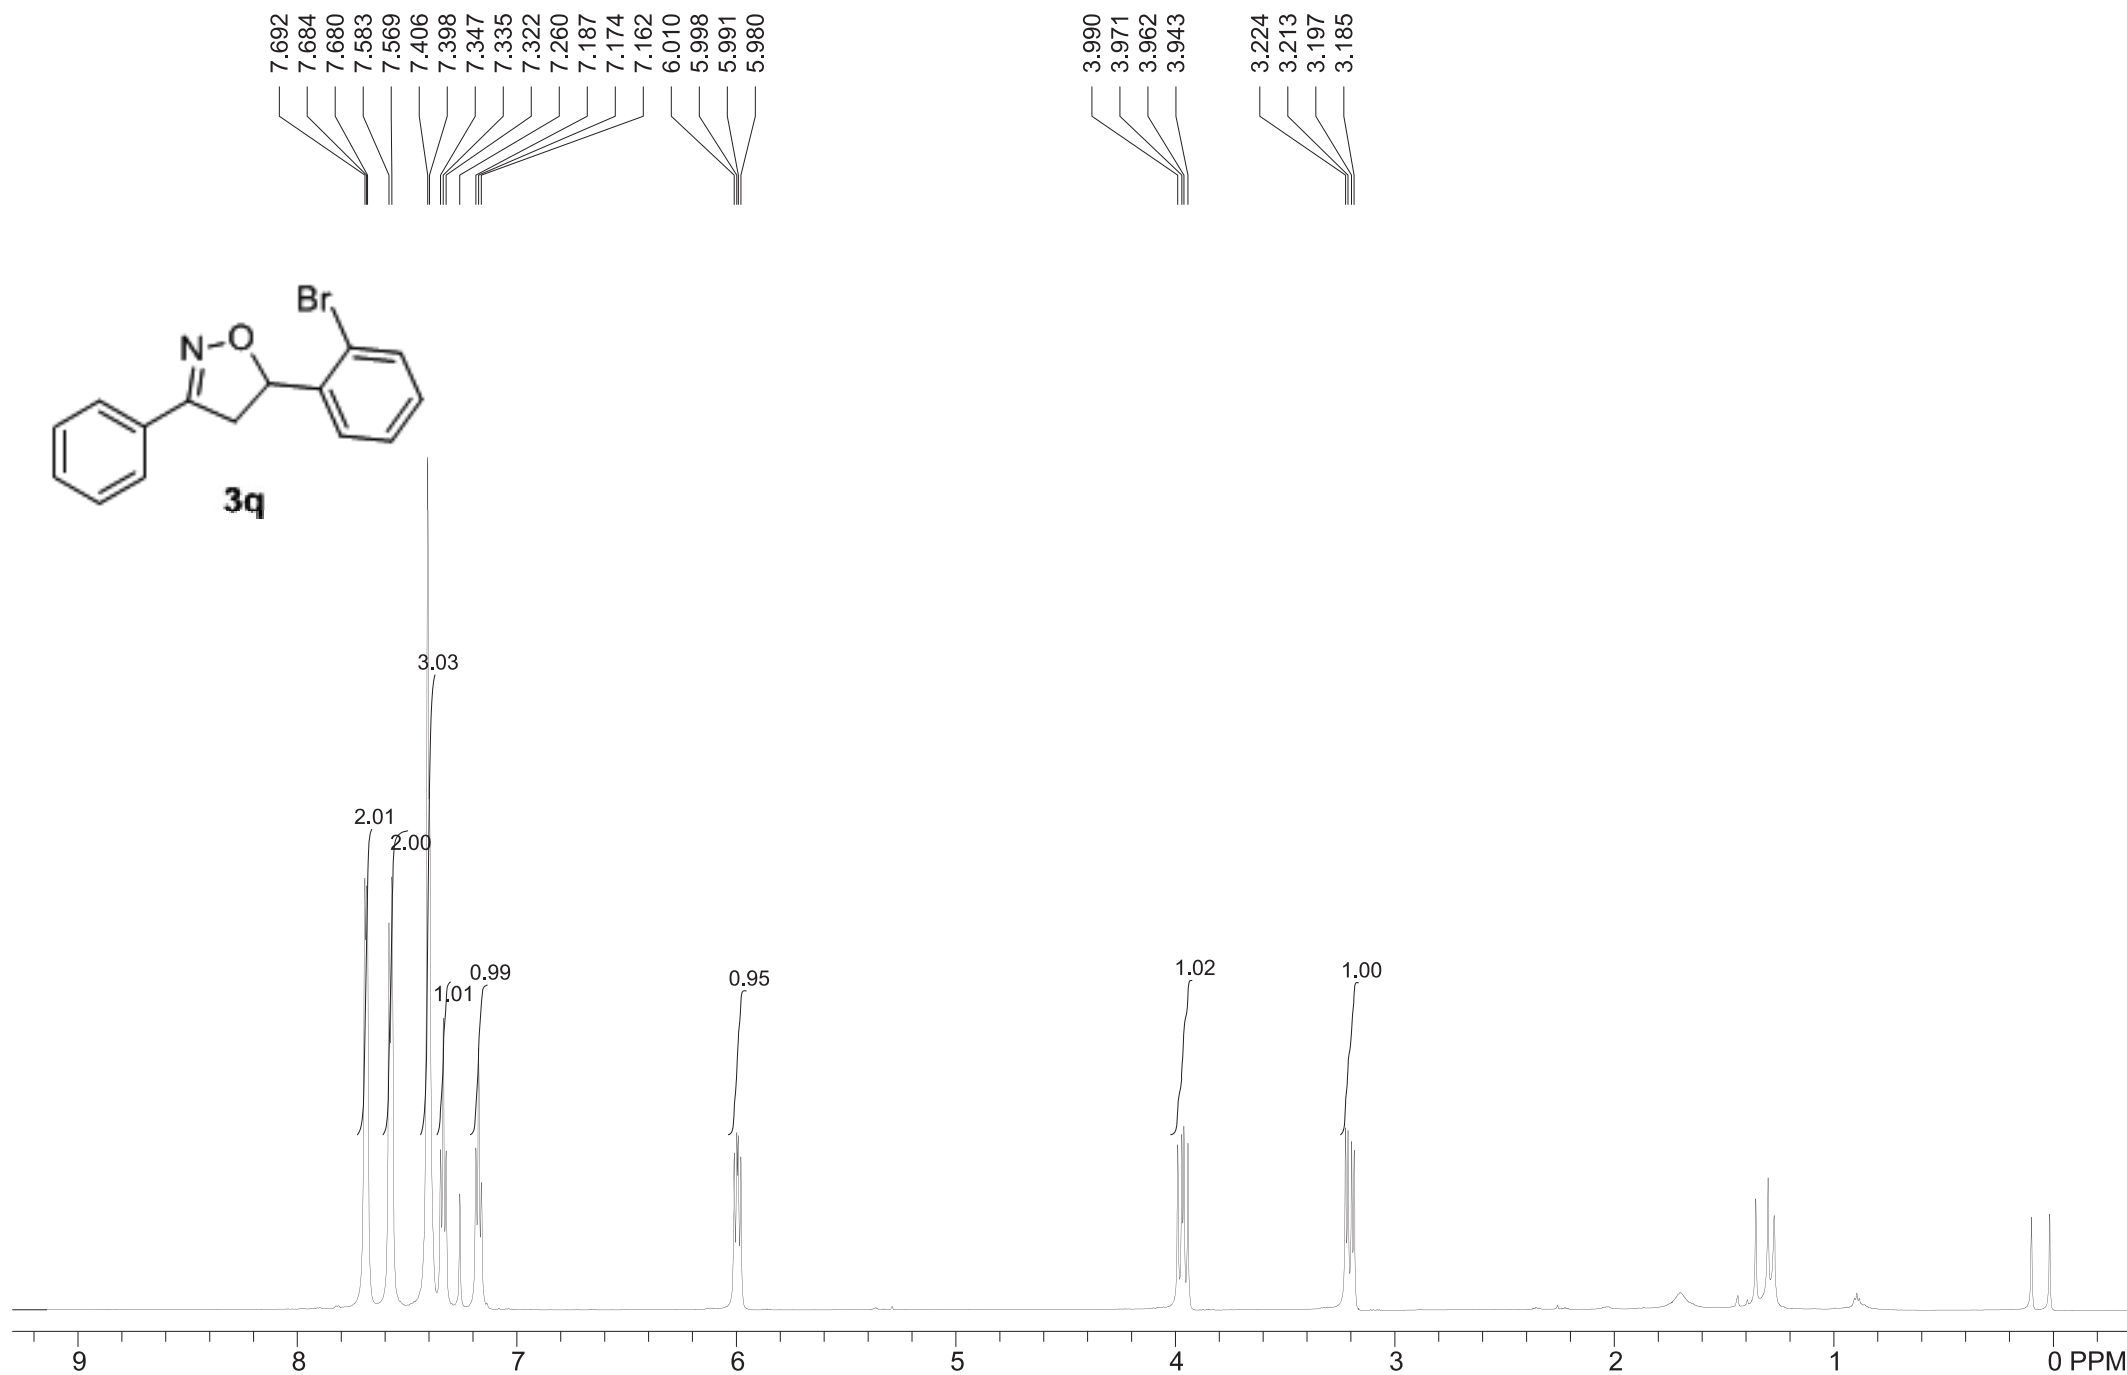

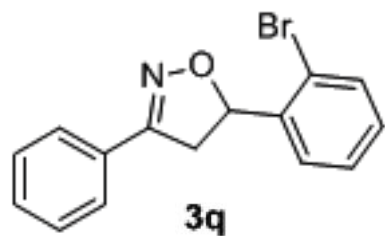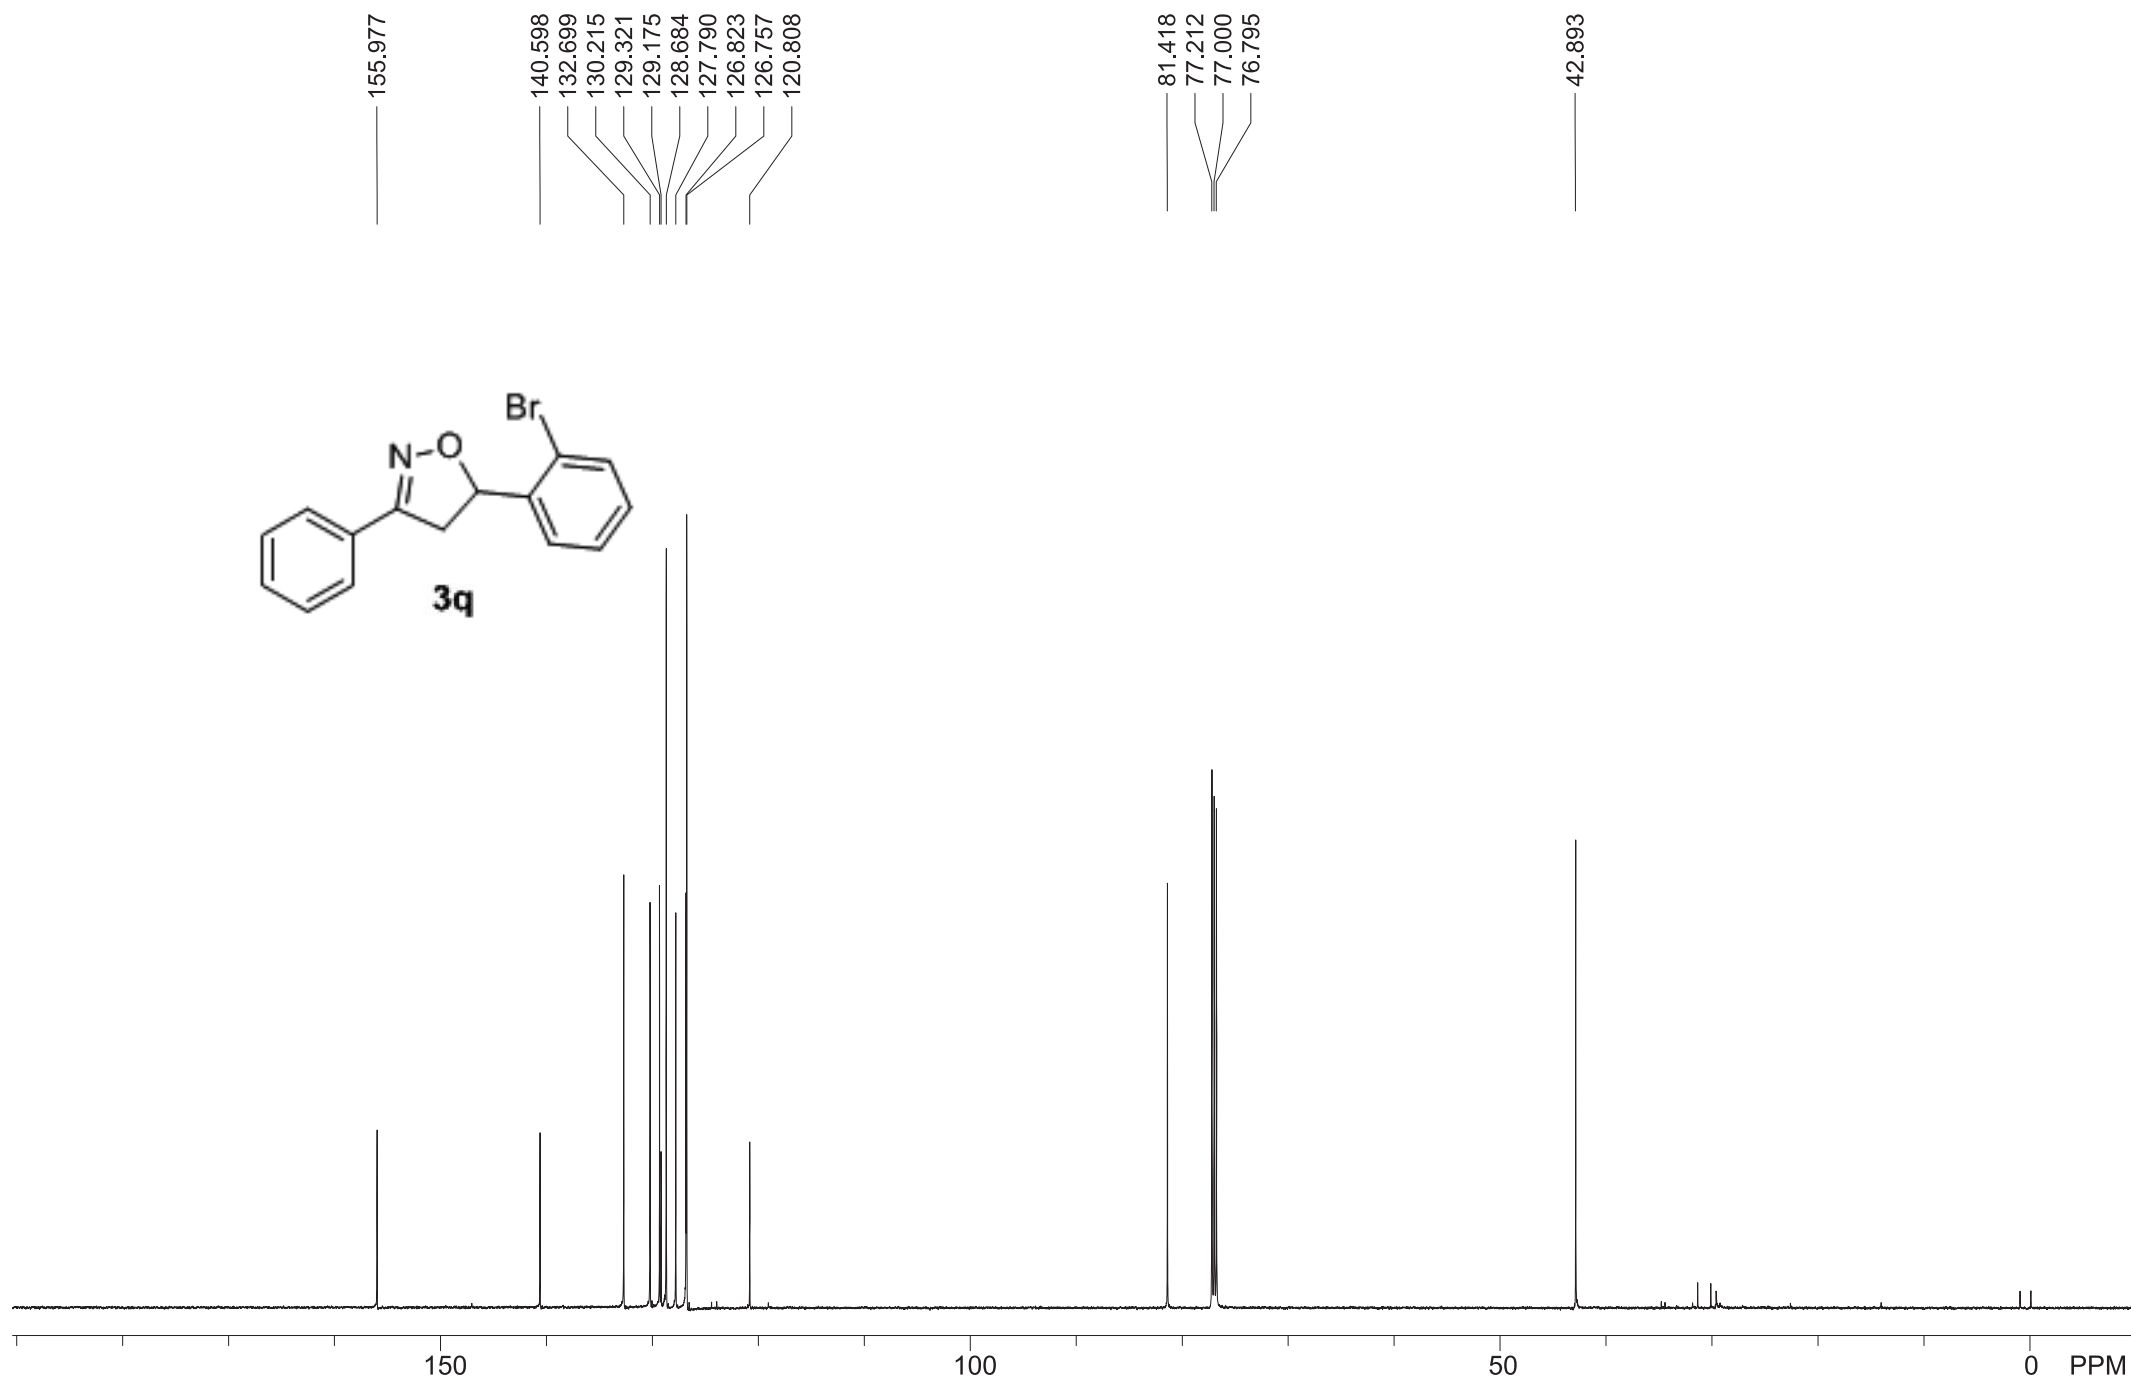

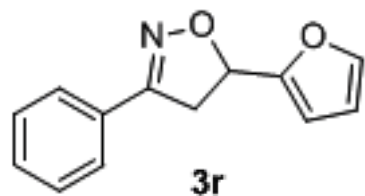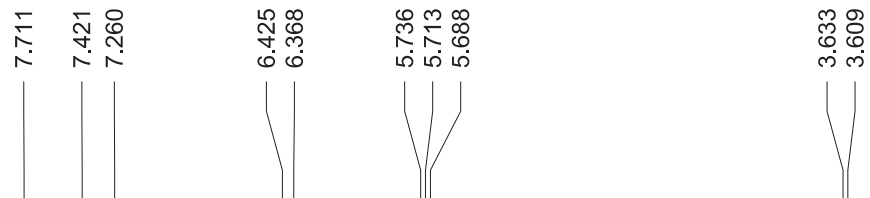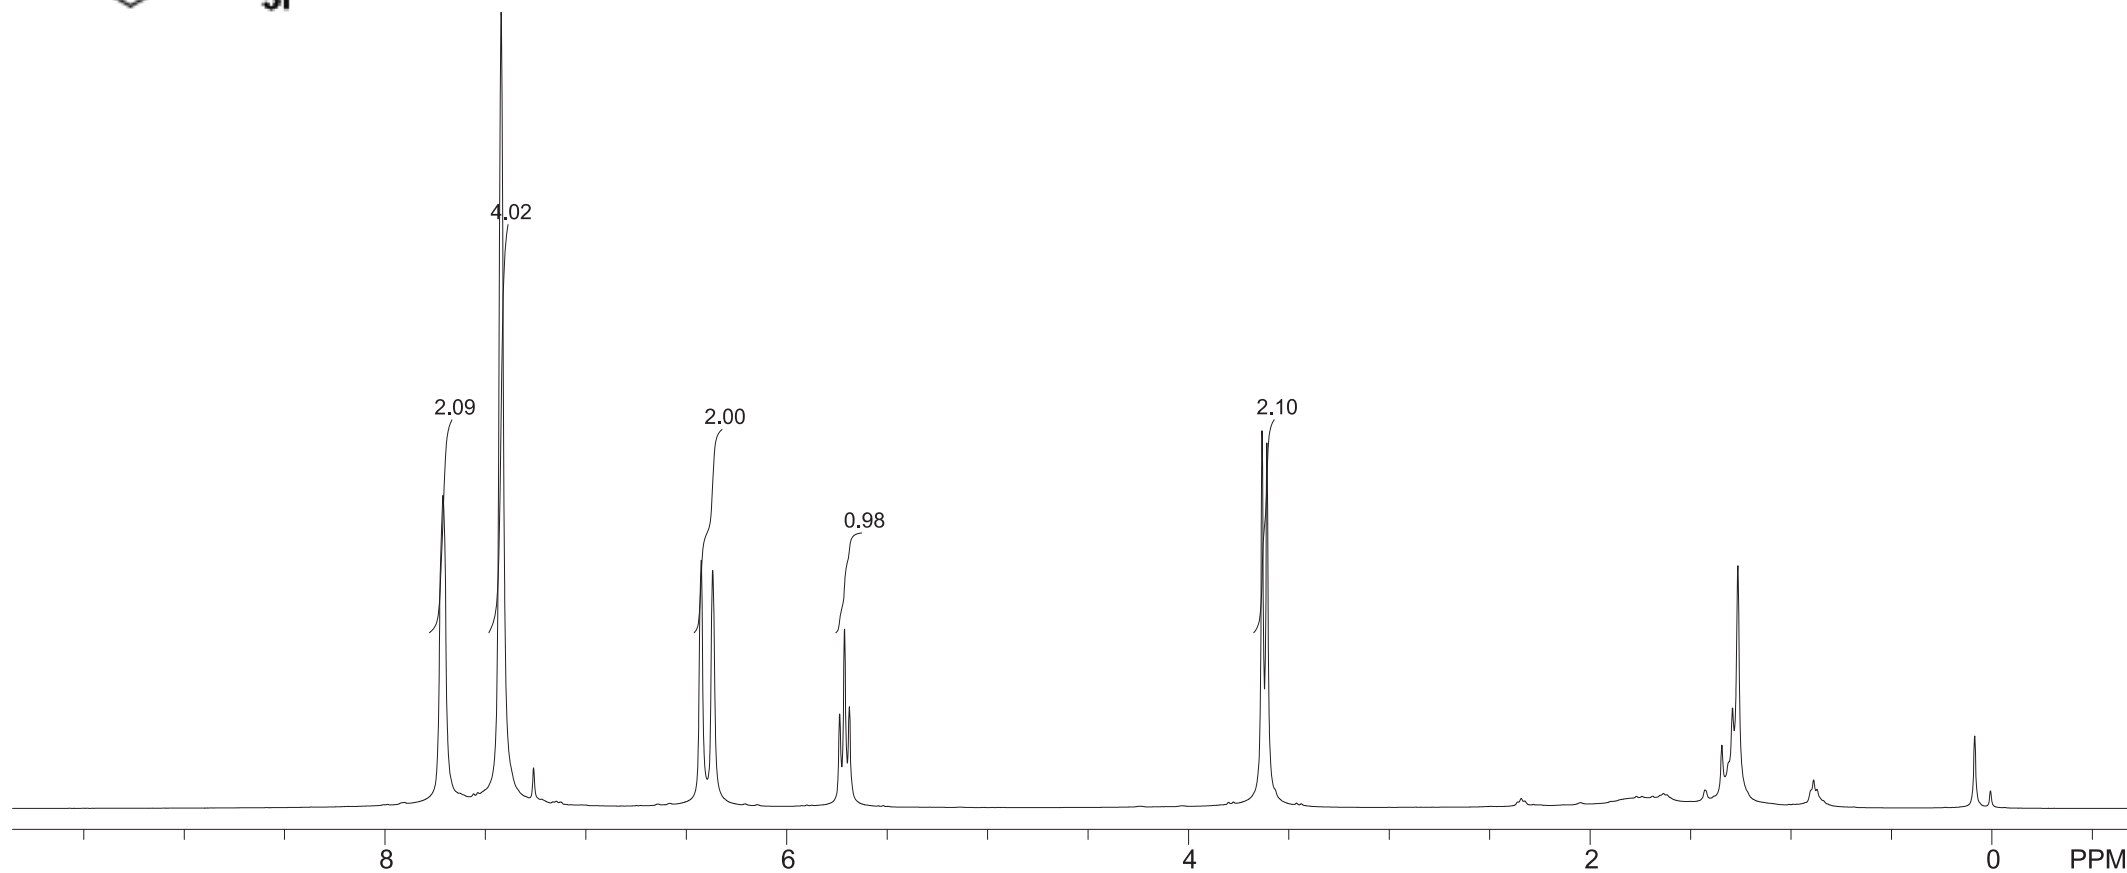

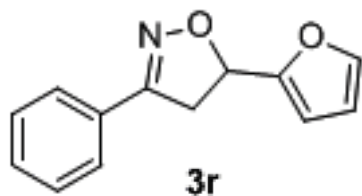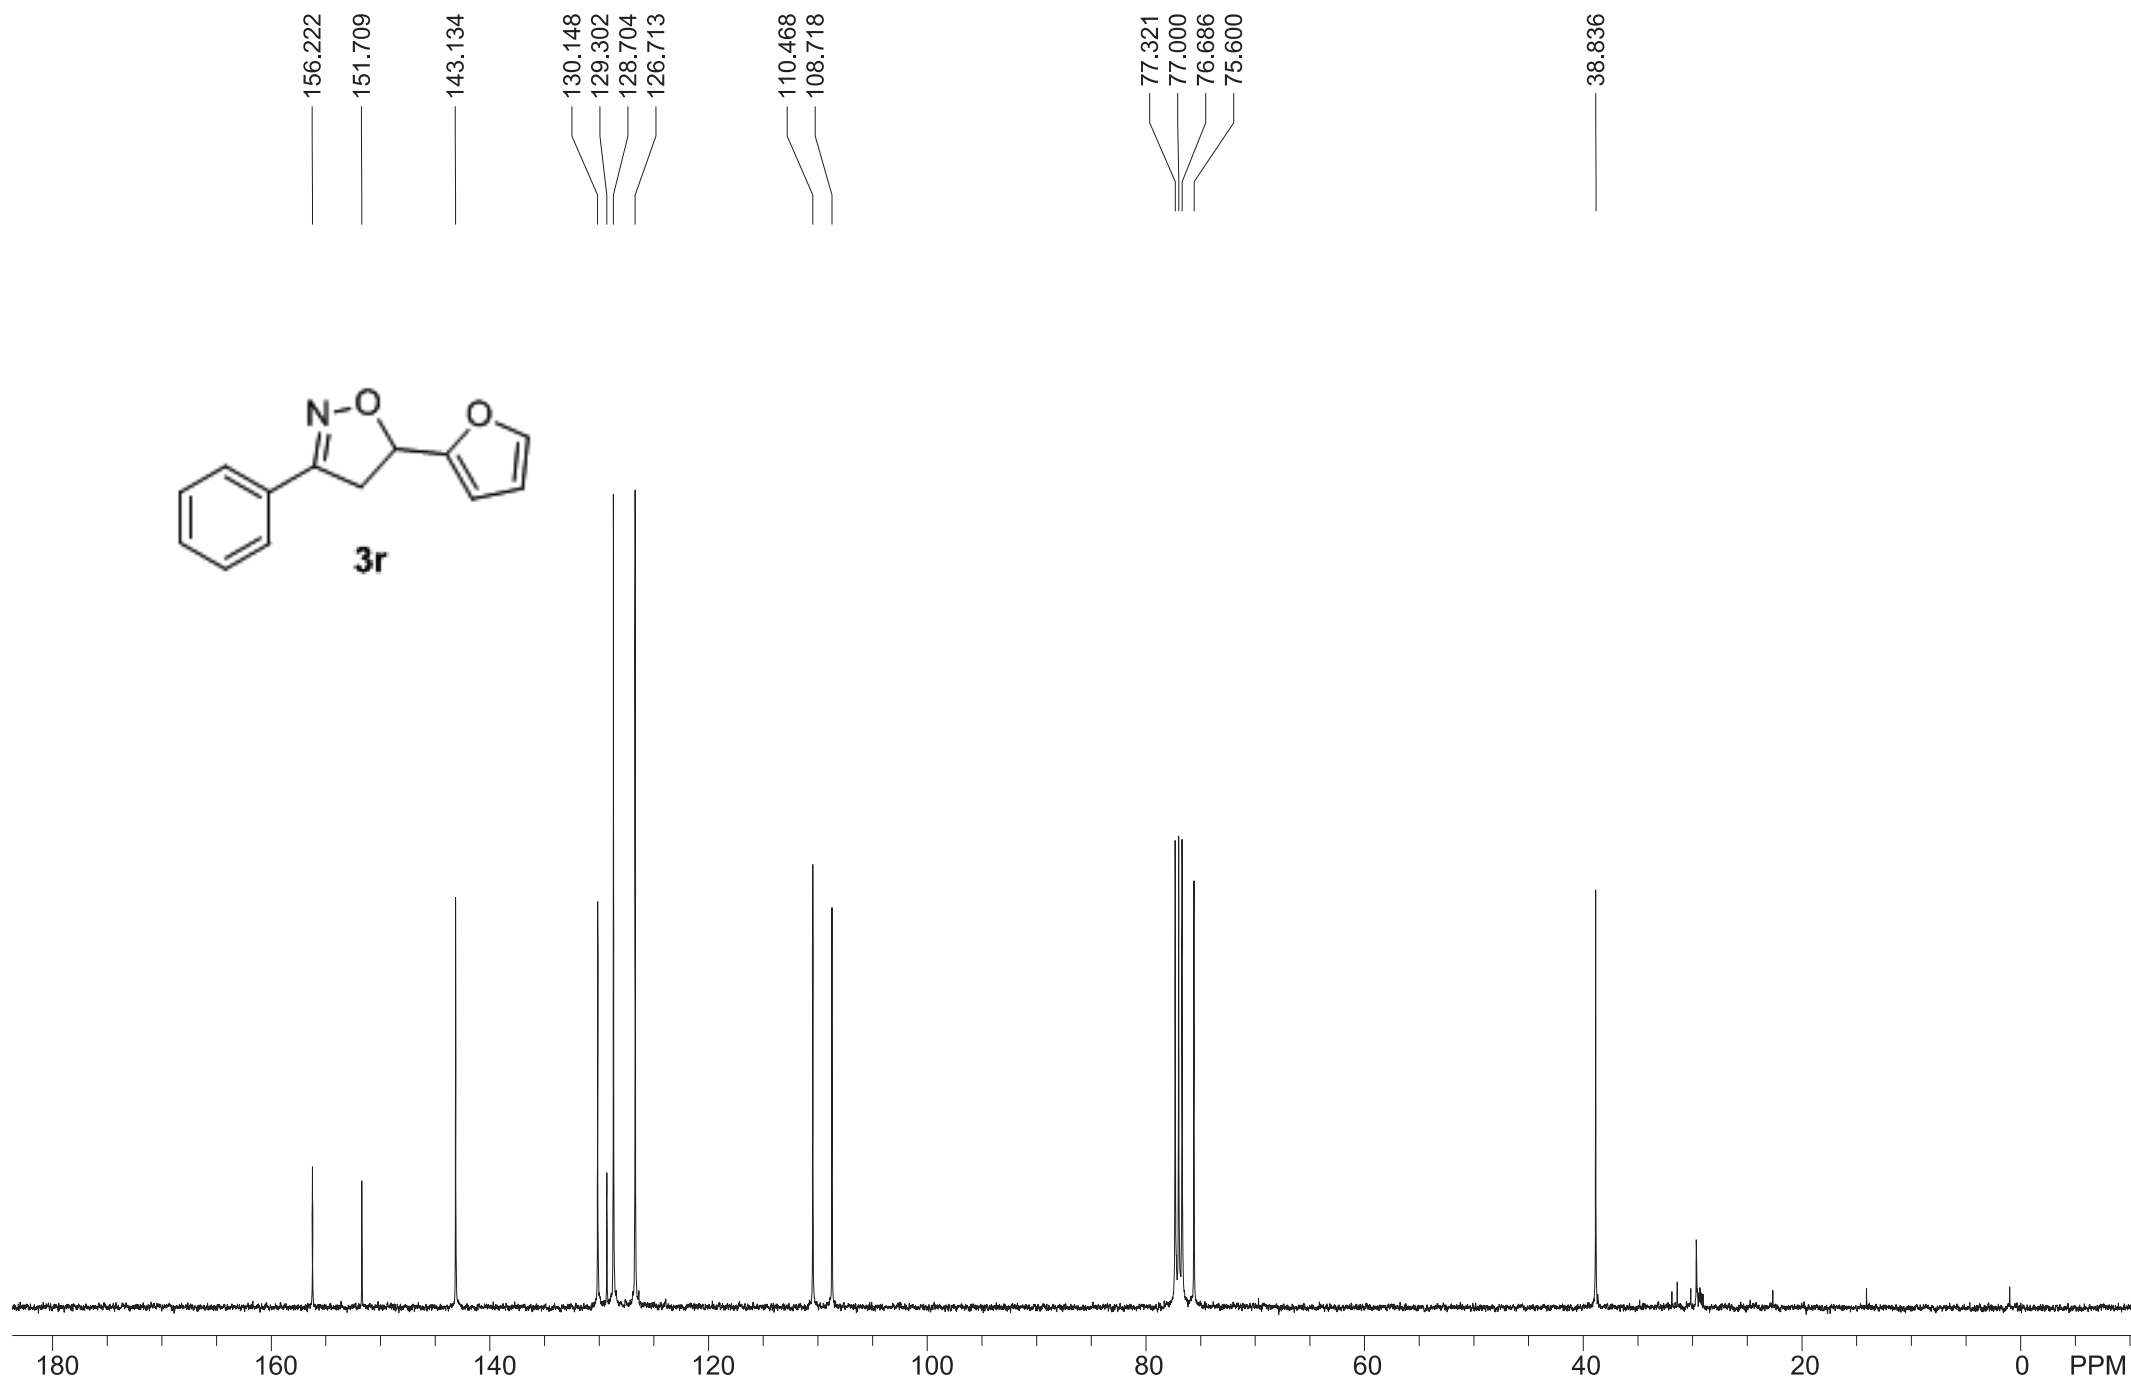

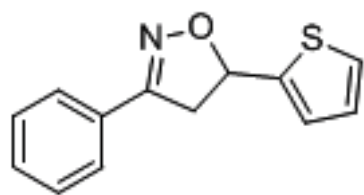

**3s**

7.720  
7.711  
7.429  
7.305  
7.293  
7.260  
7.111  
7.007  
6.997  
6.987

5.976  
5.952  
5.930

3.792  
3.765  
3.751  
3.724  
3.507  
3.487  
3.465  
3.445

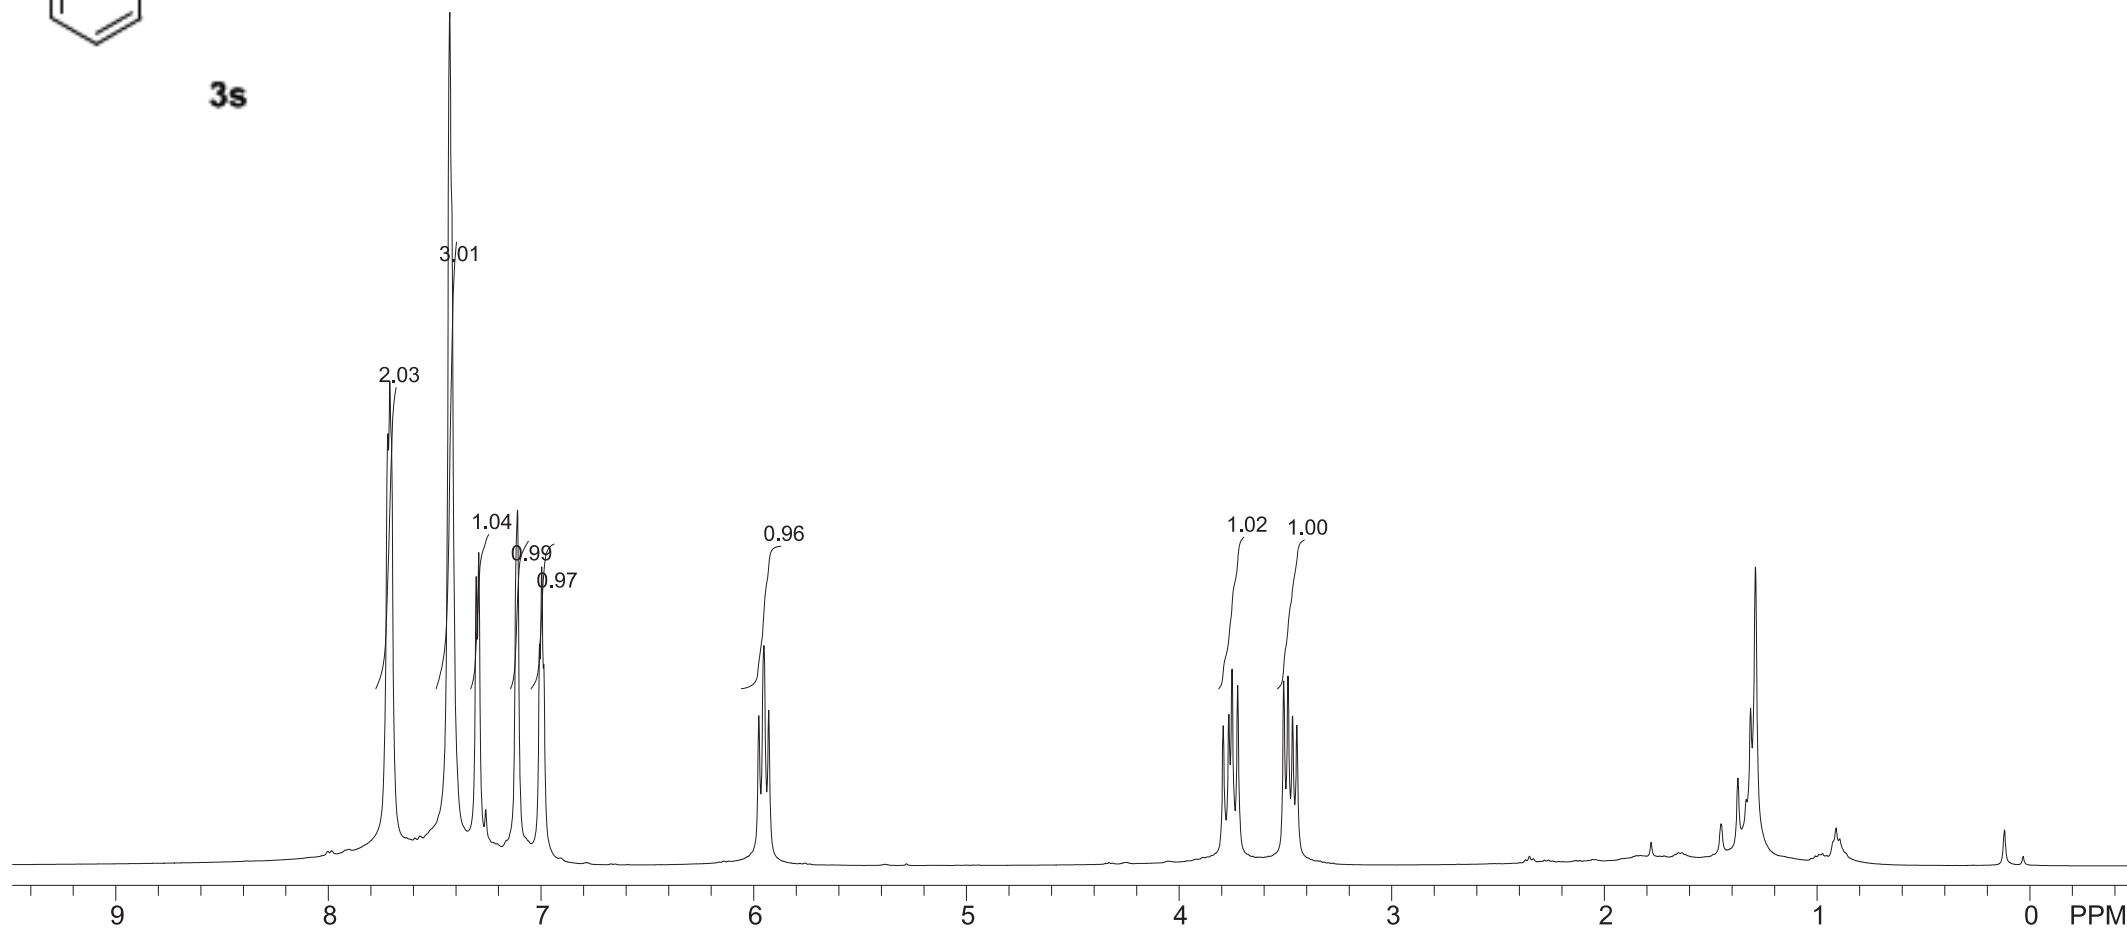

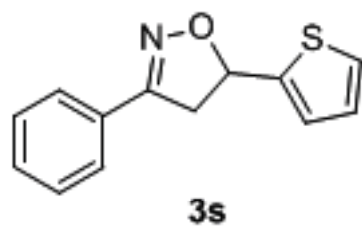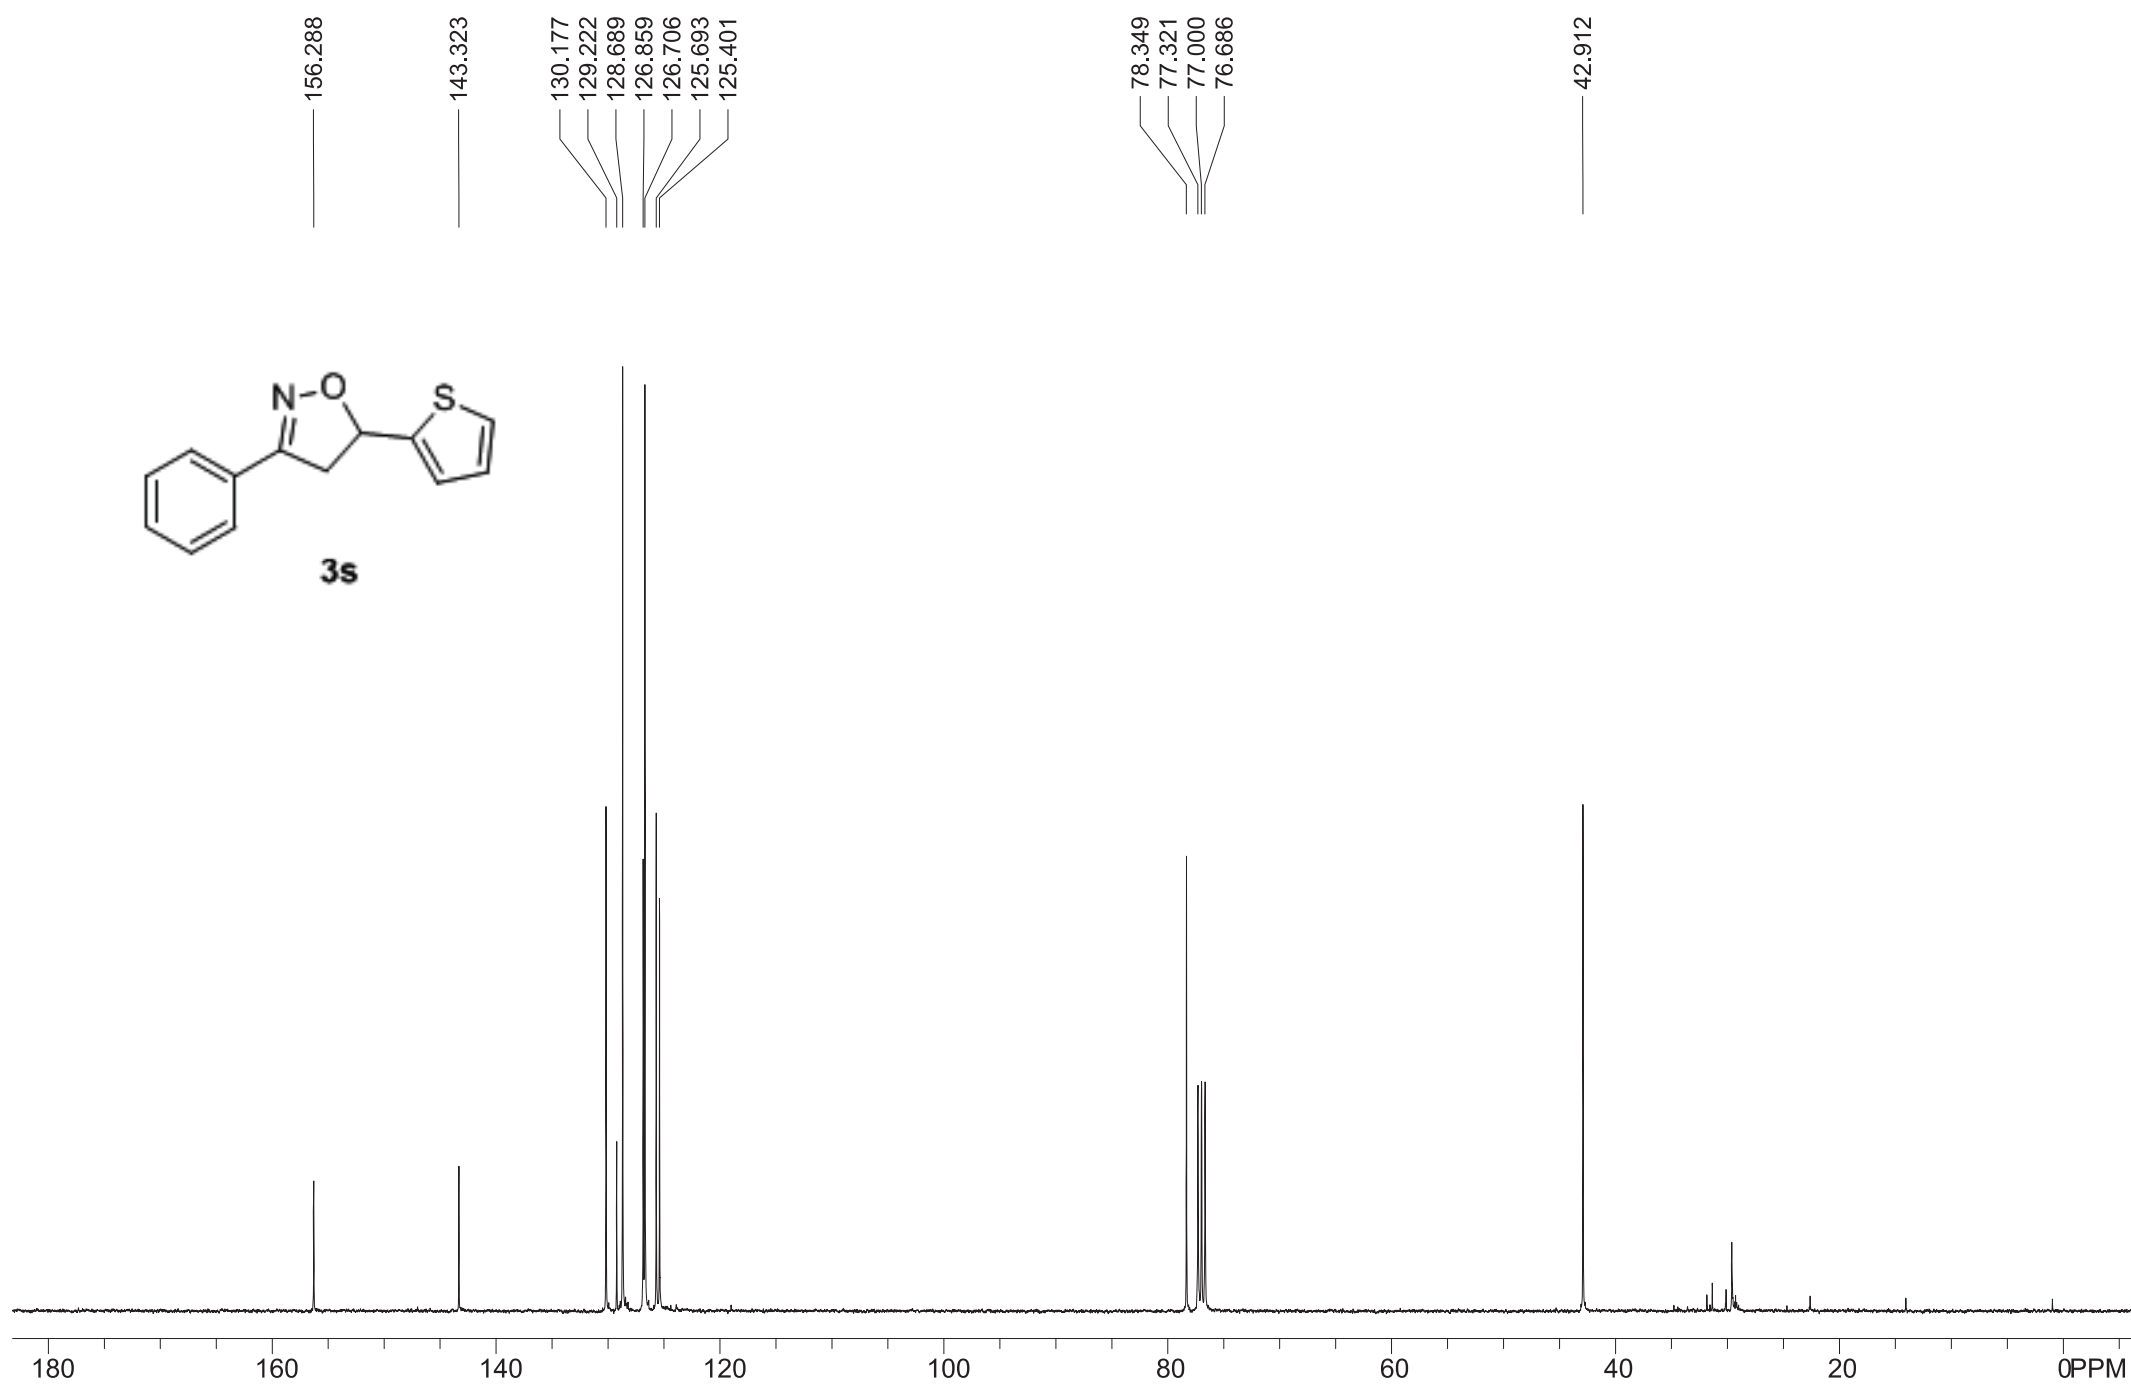

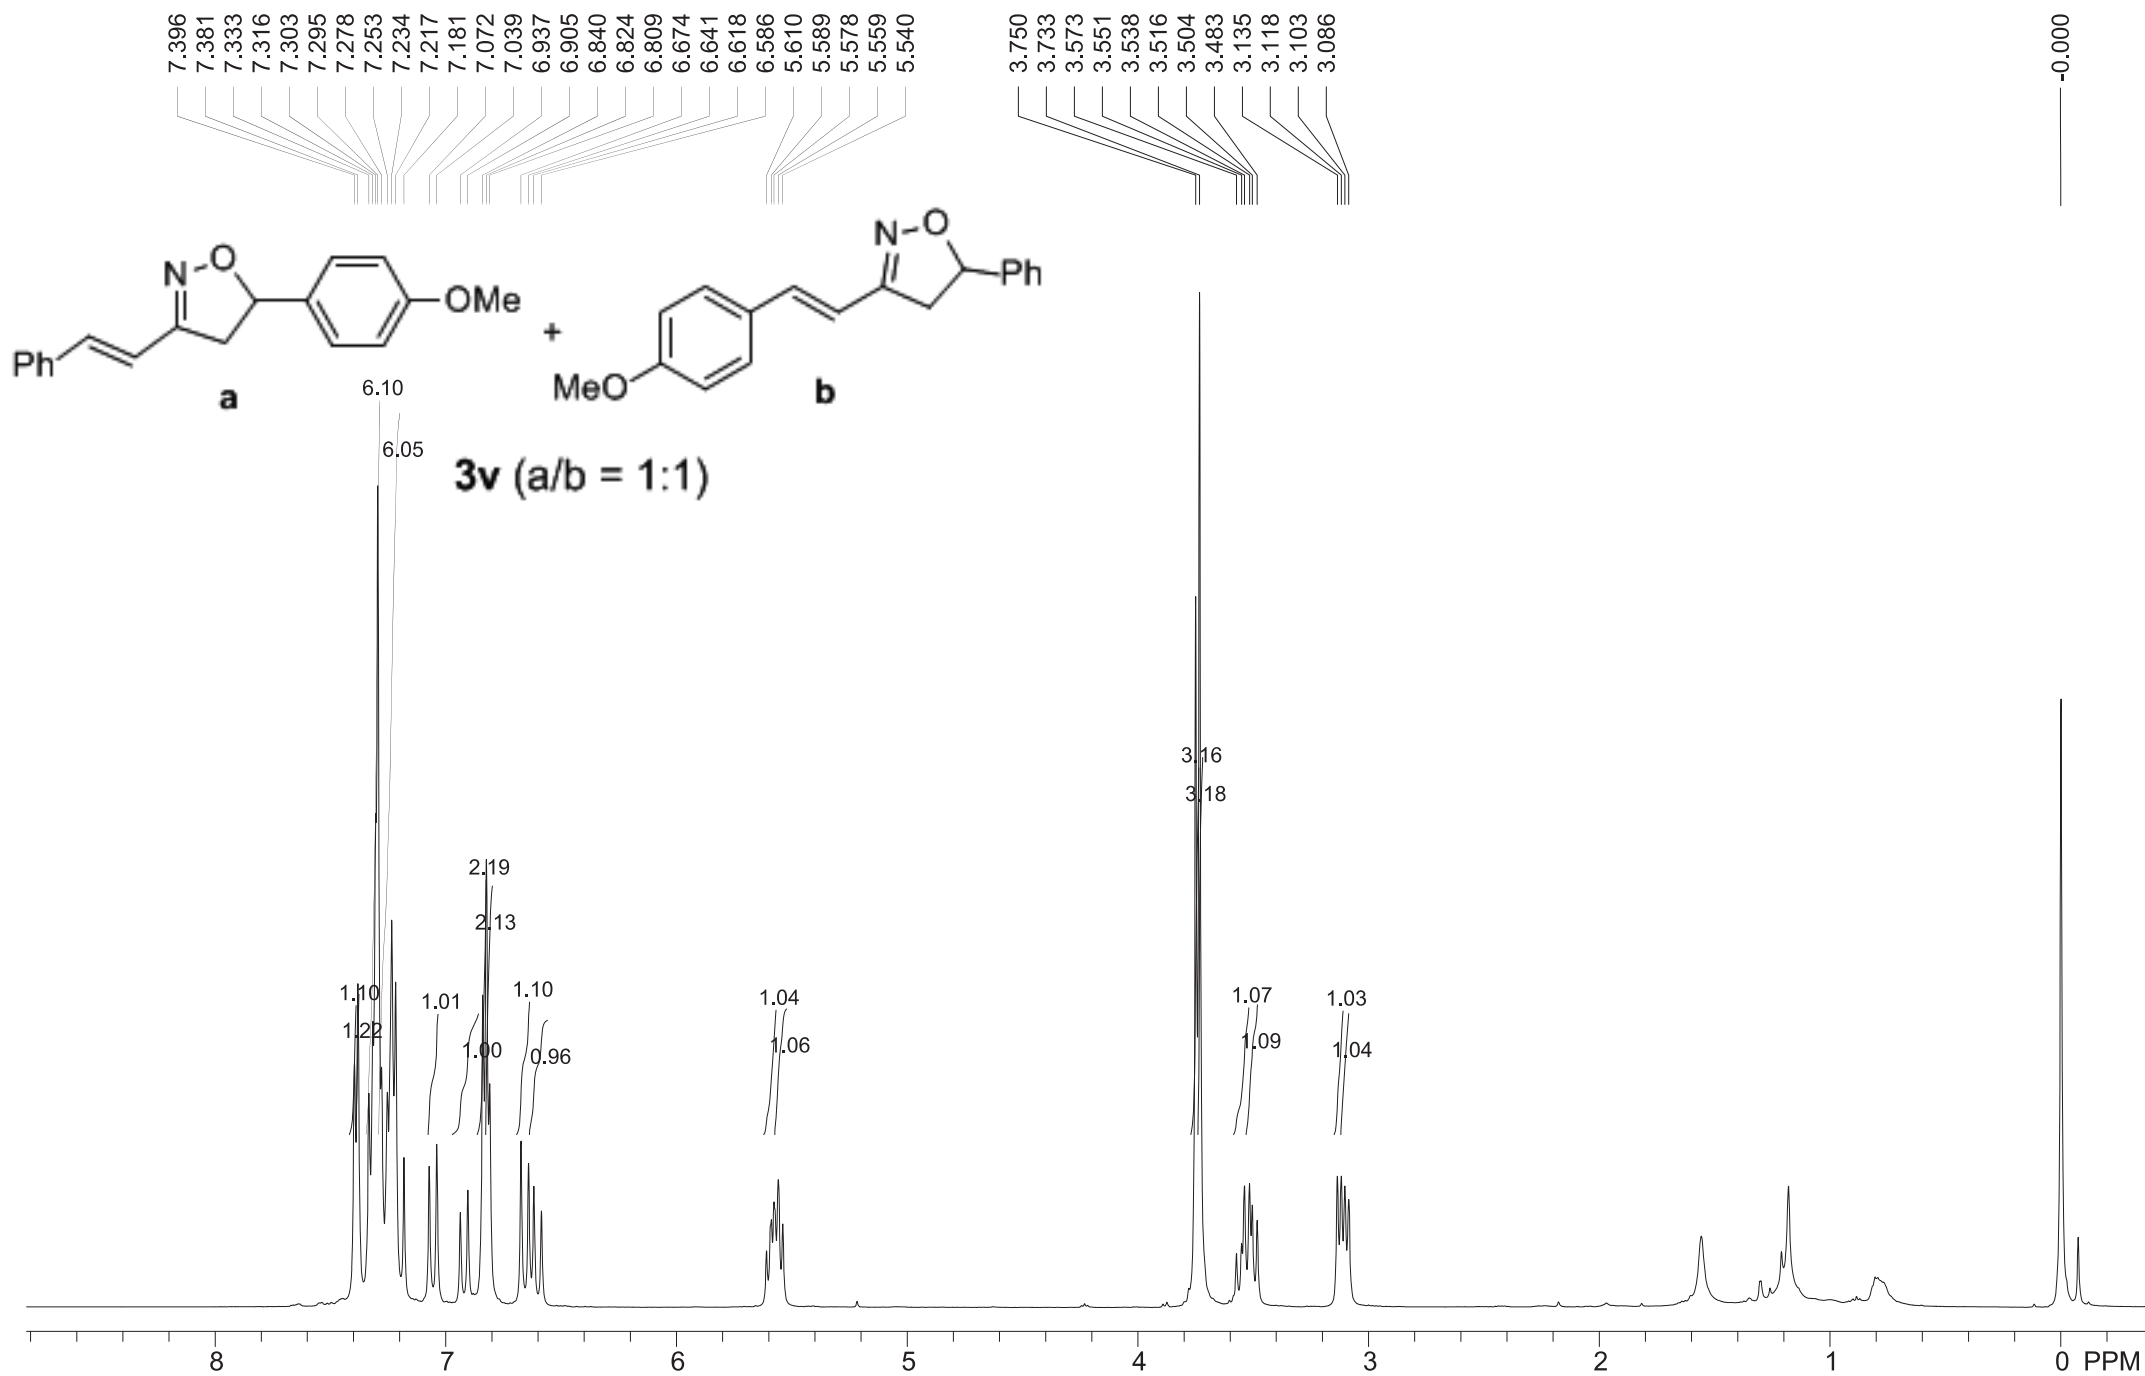



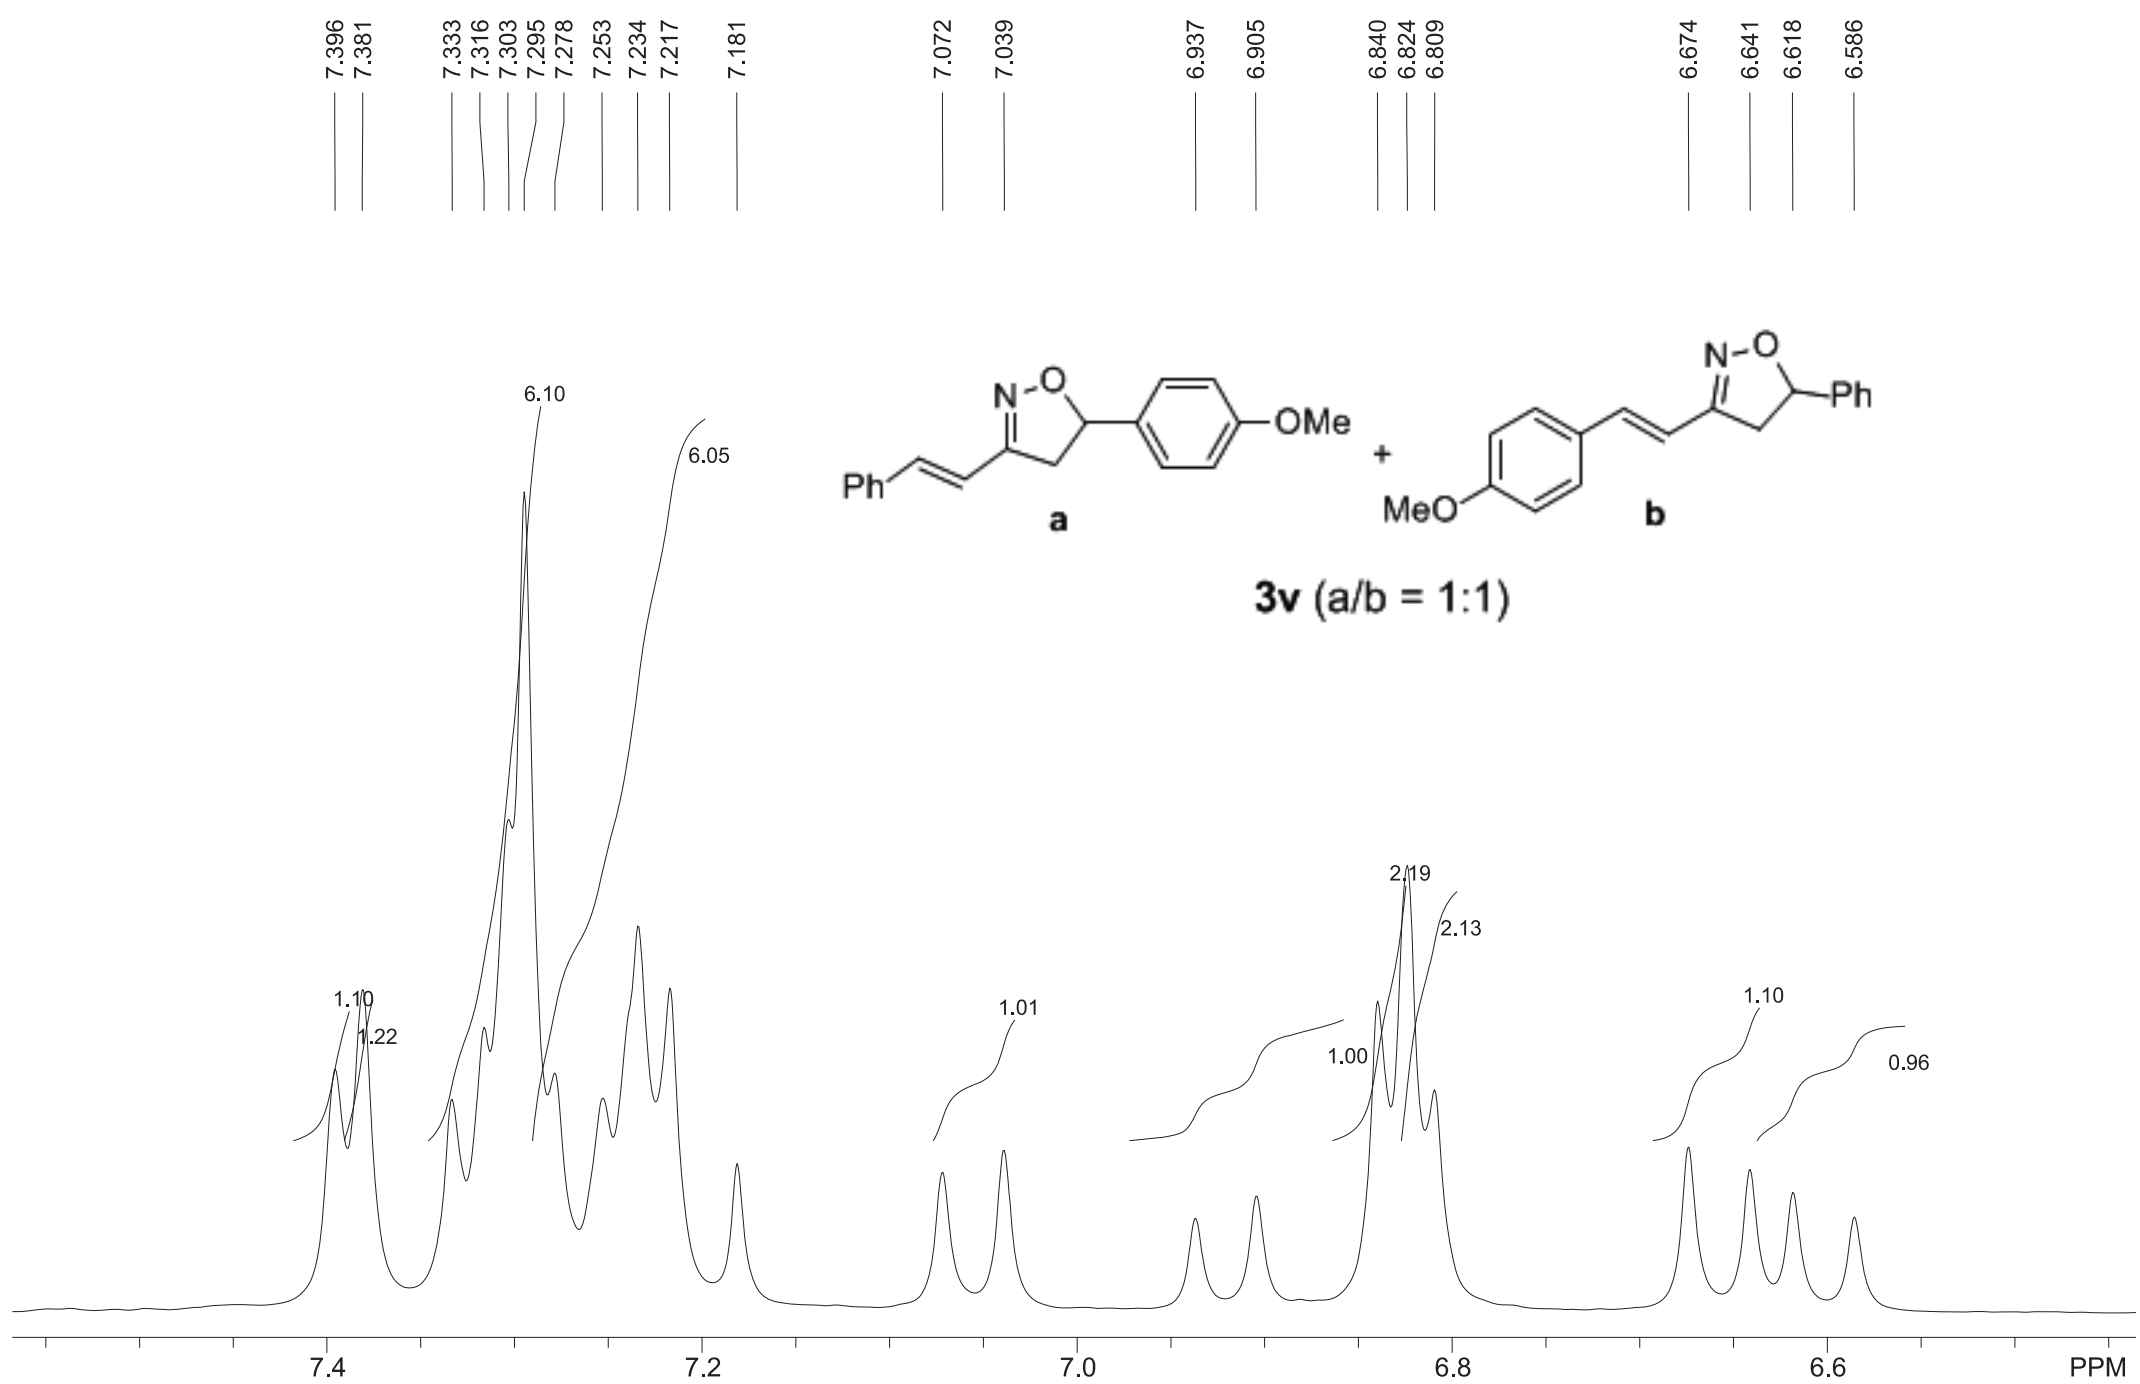

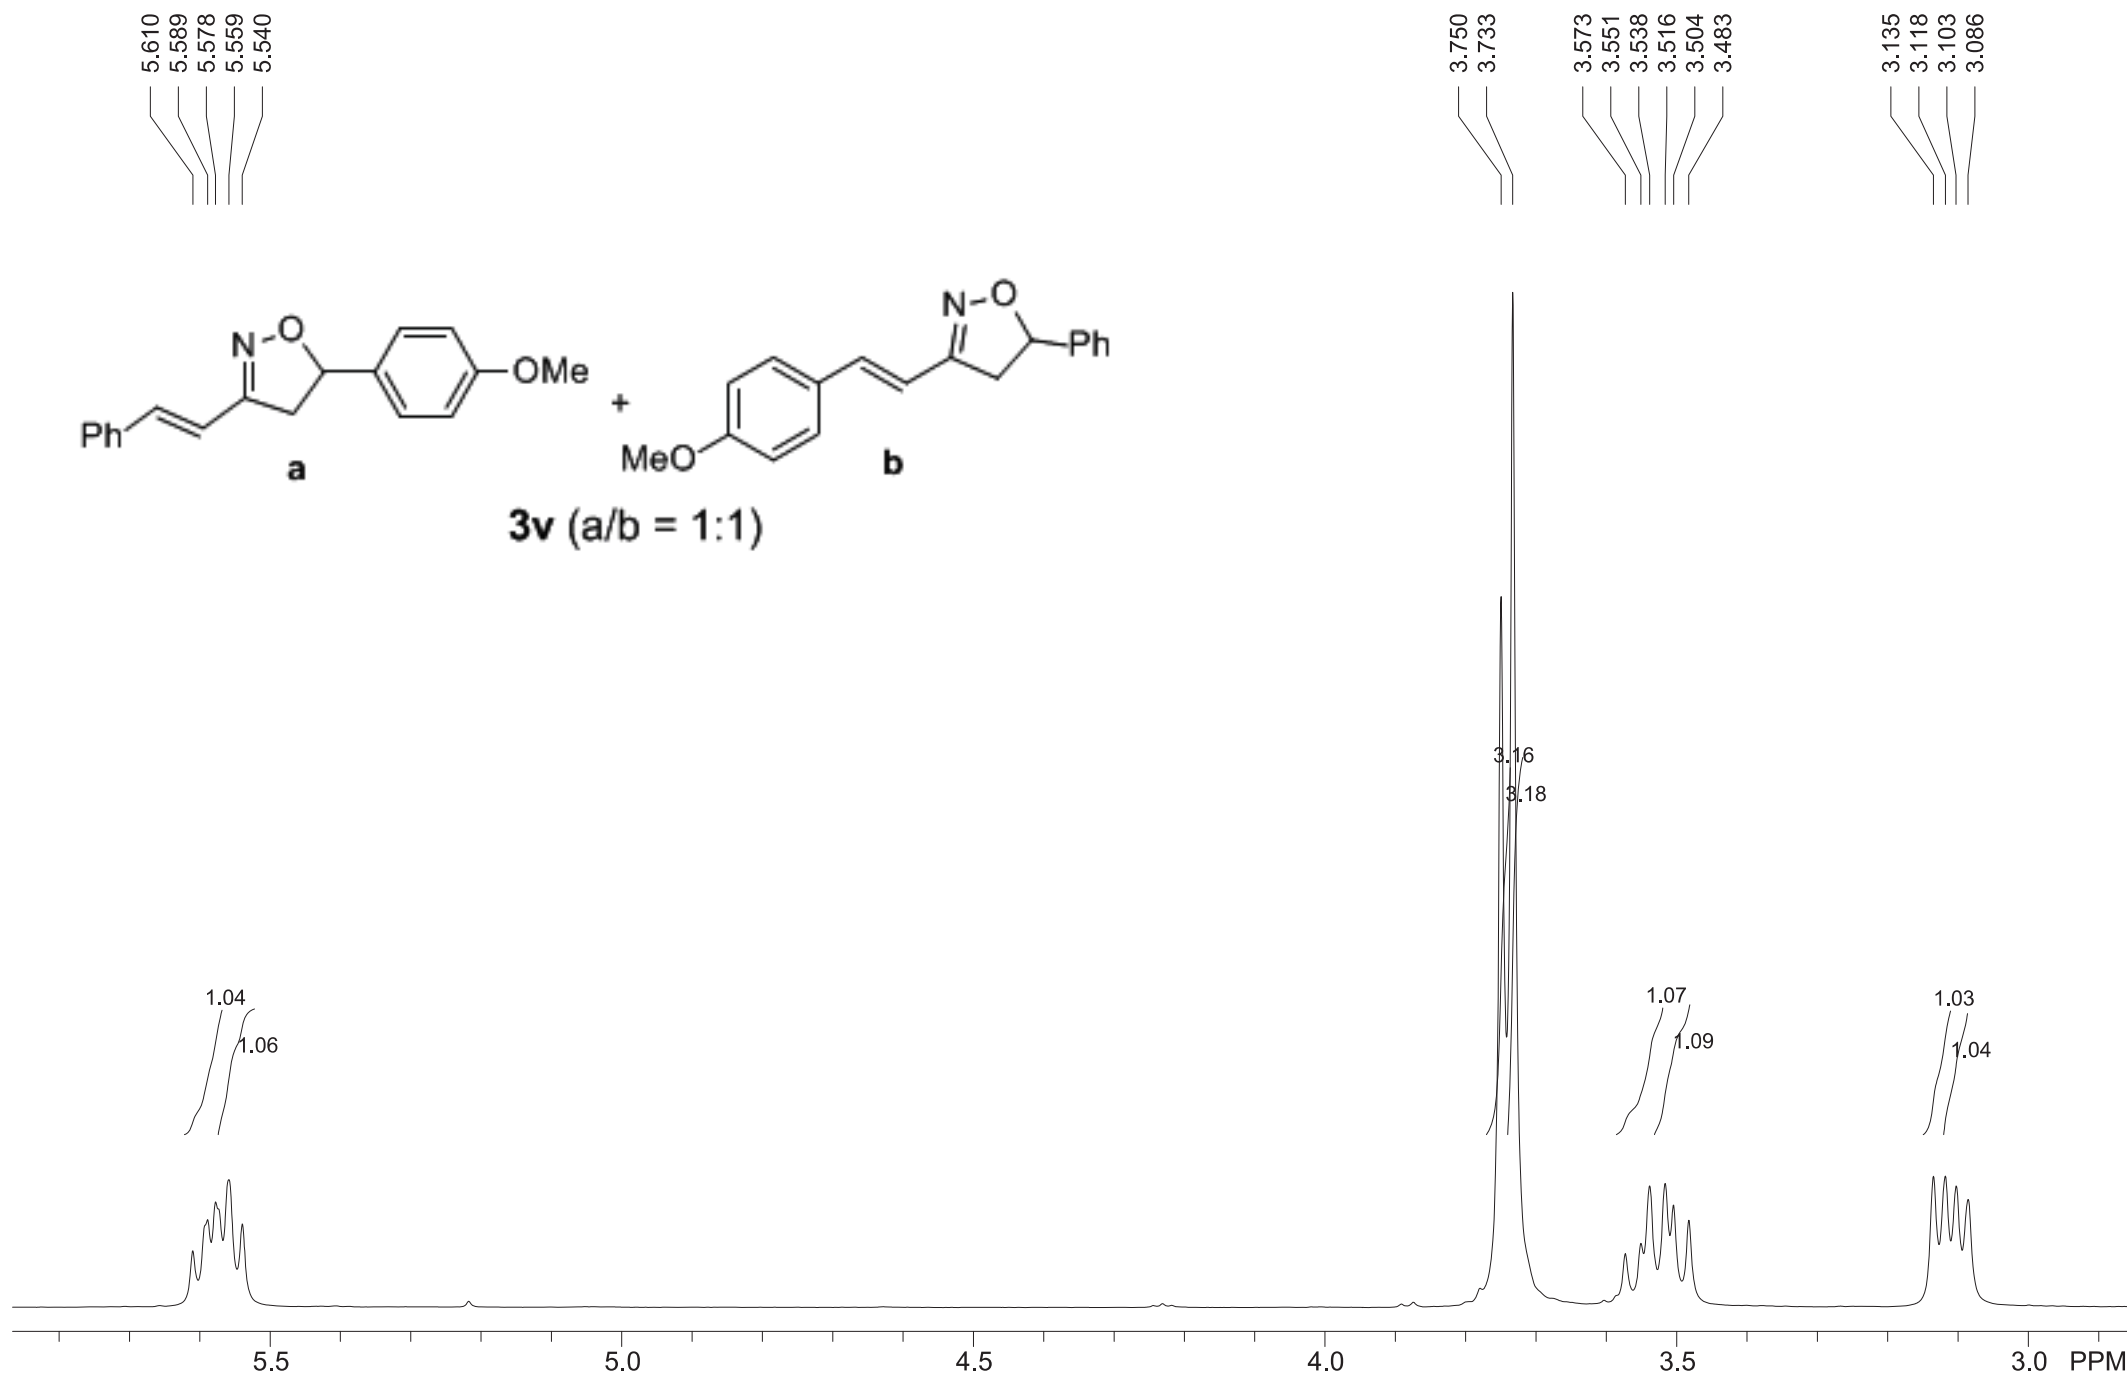

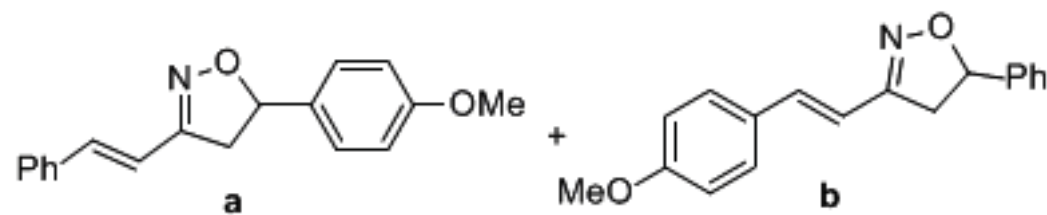

**3v** (a/b = 1:1)

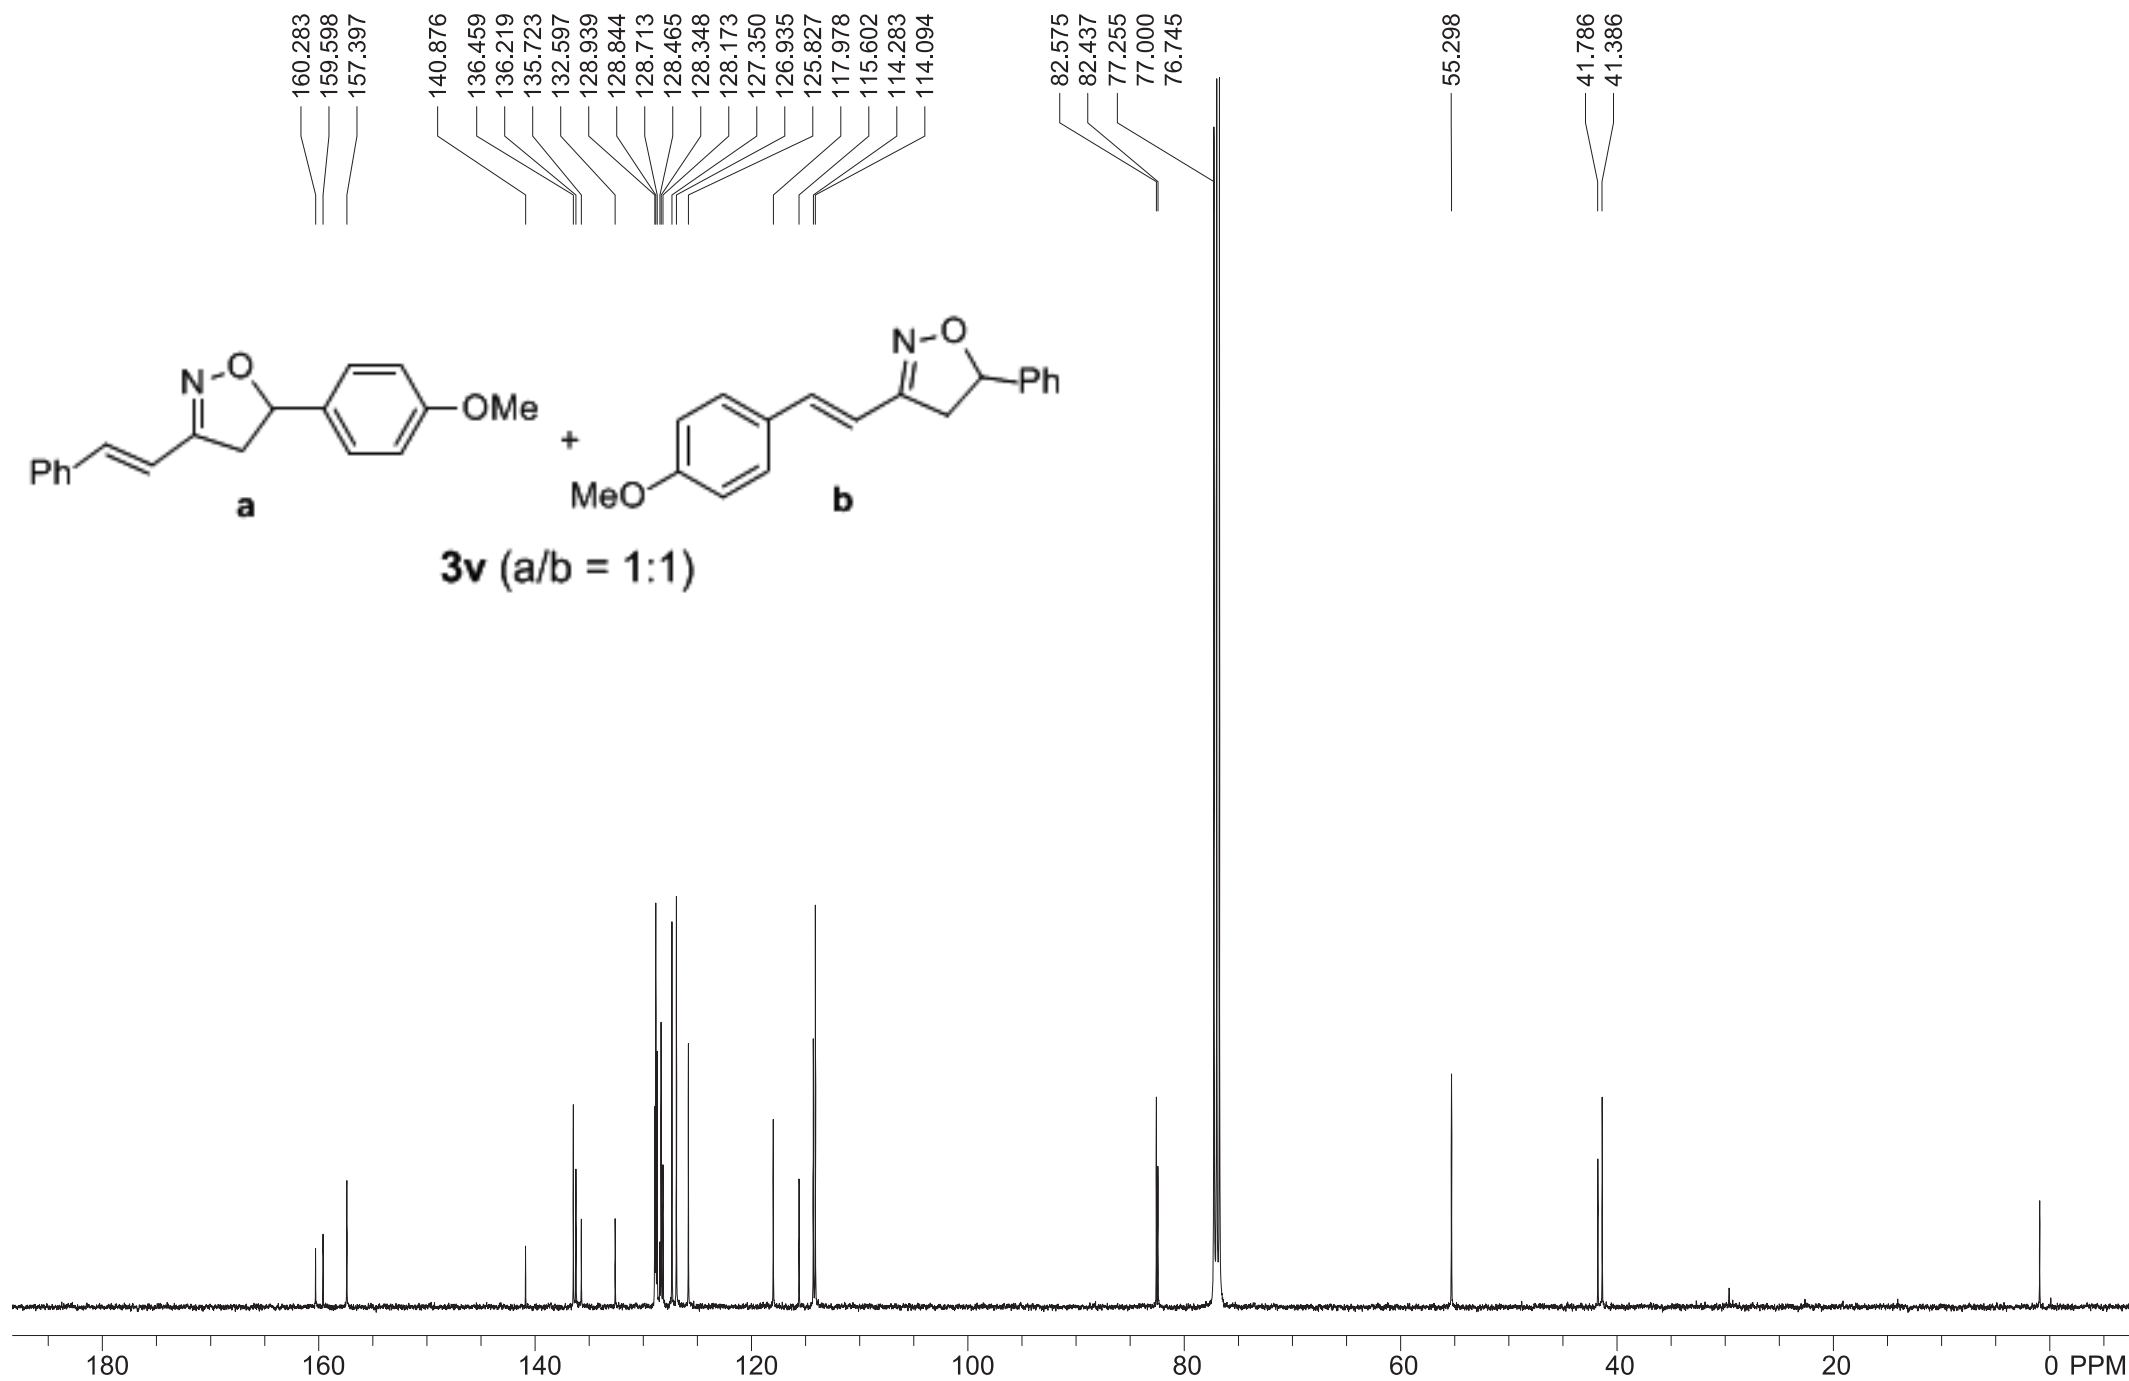

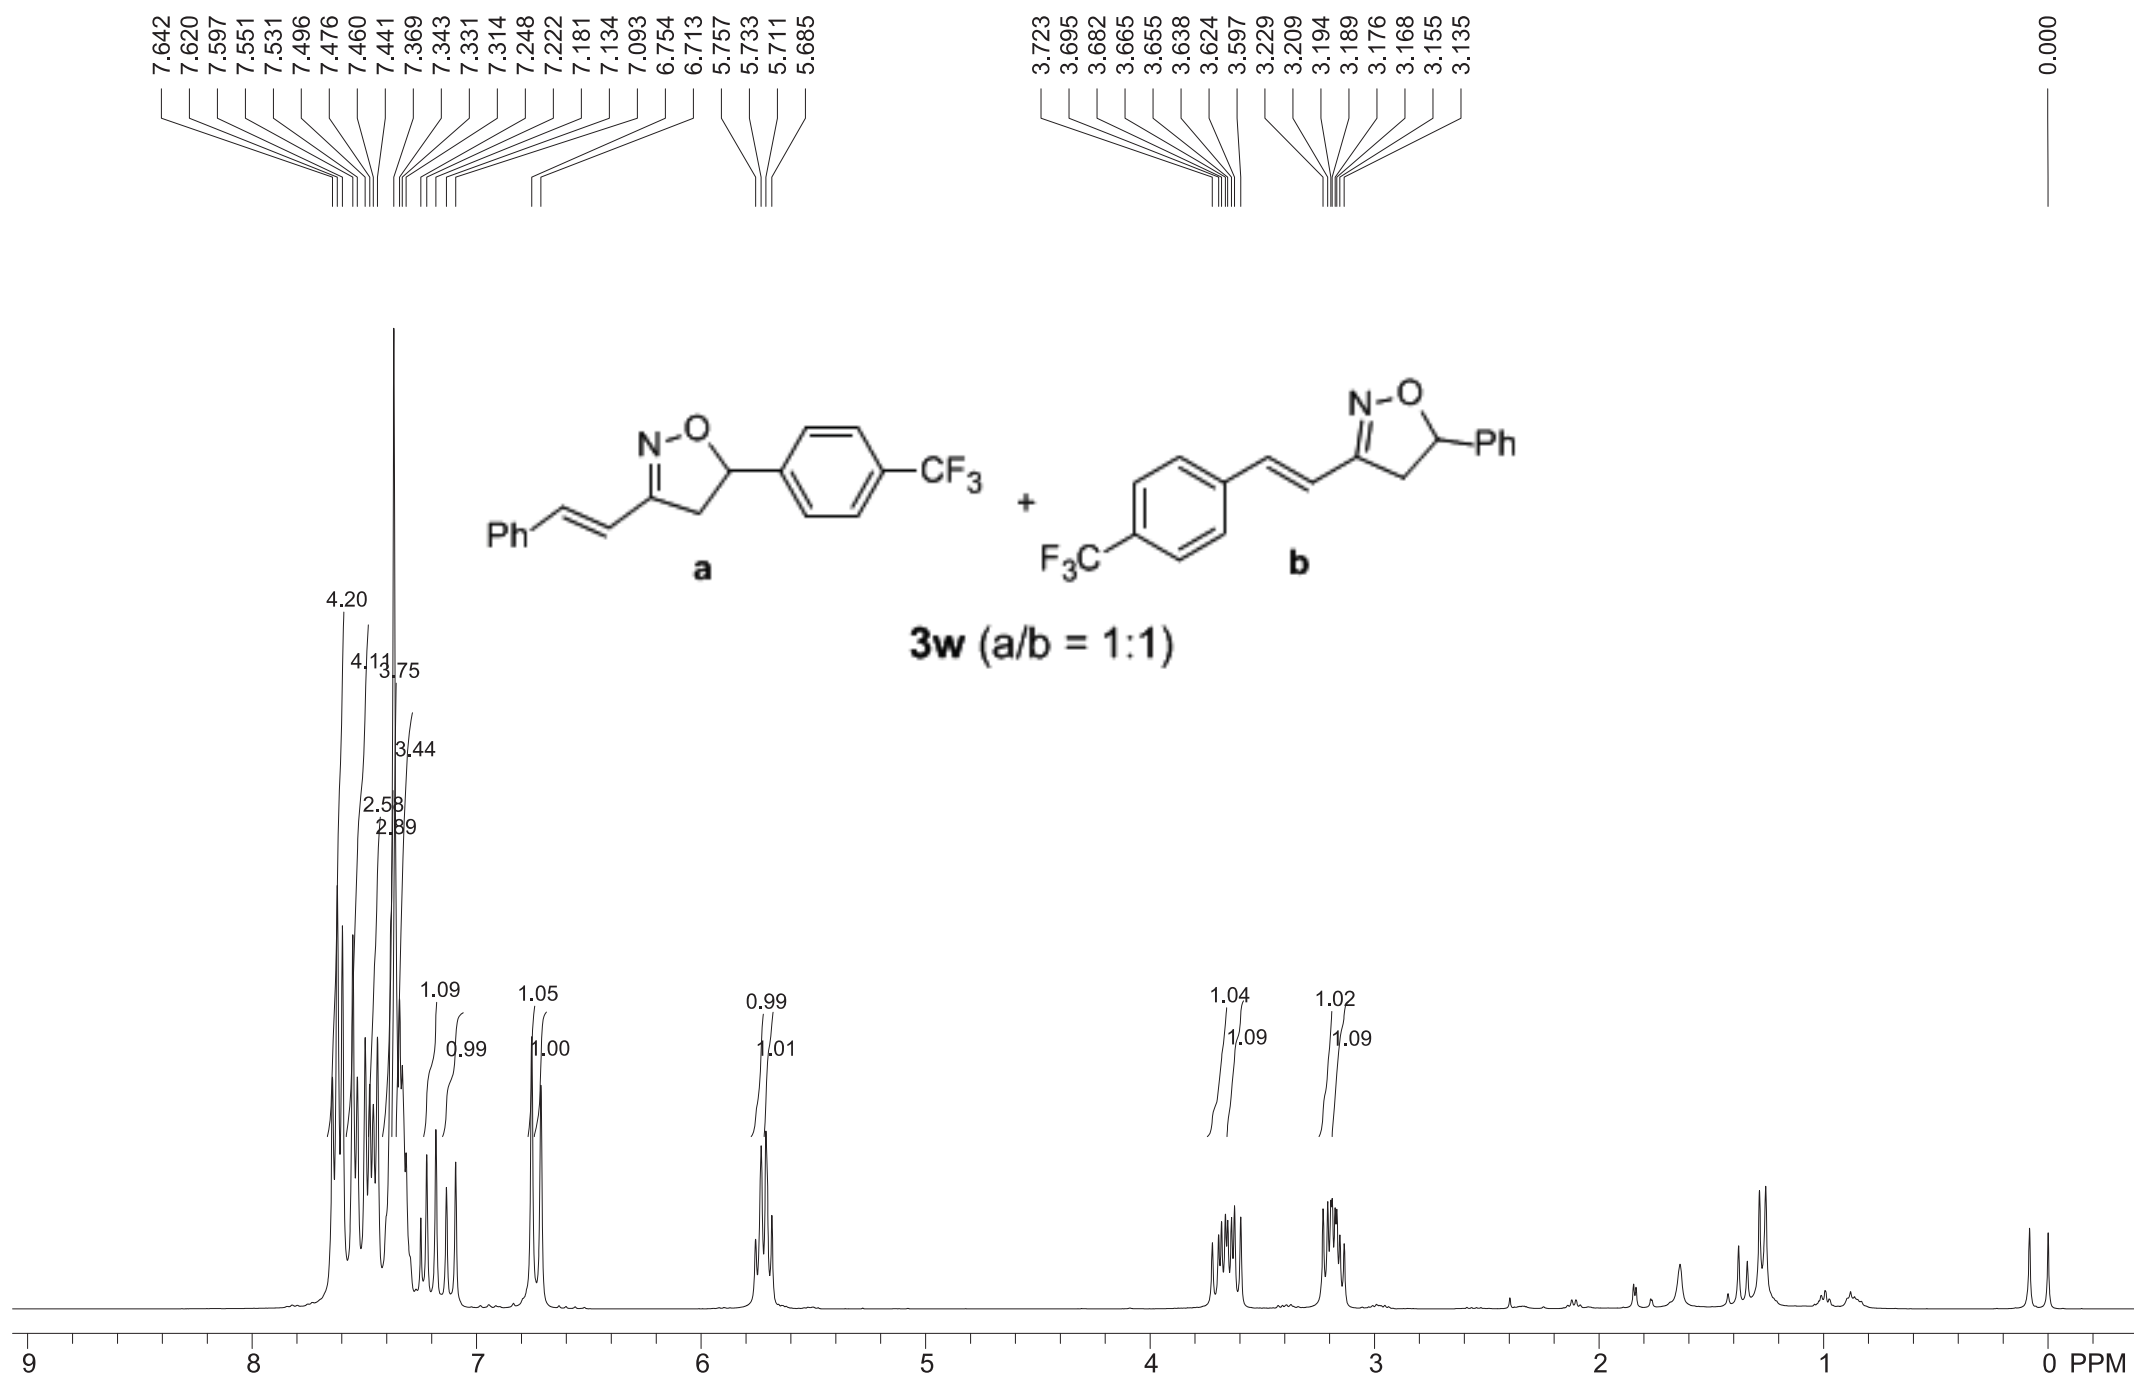

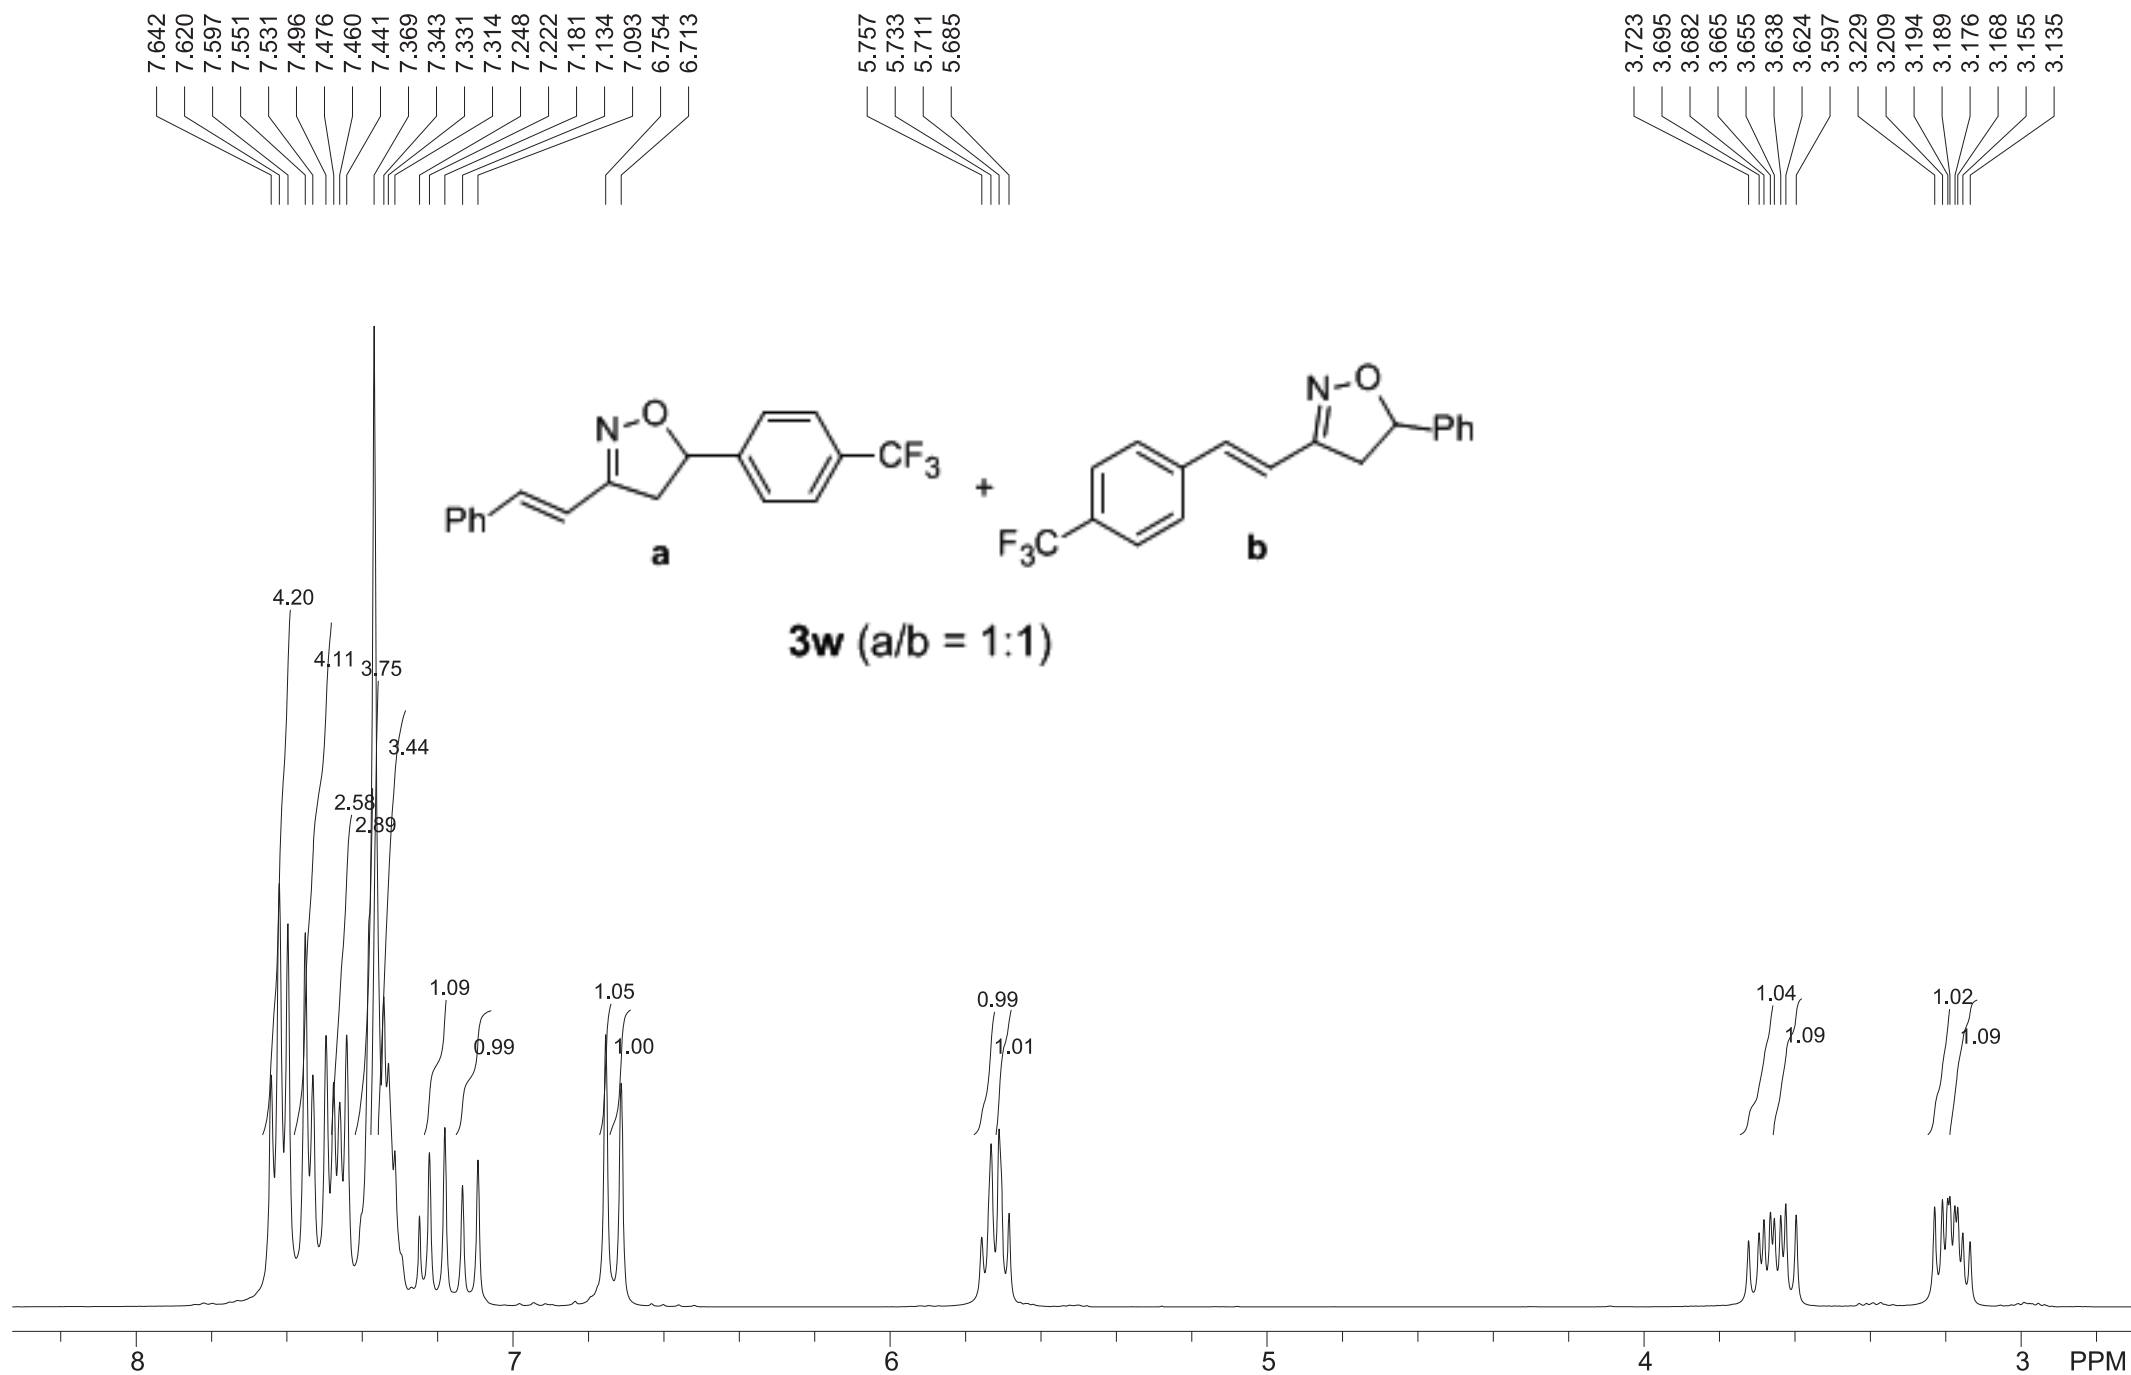

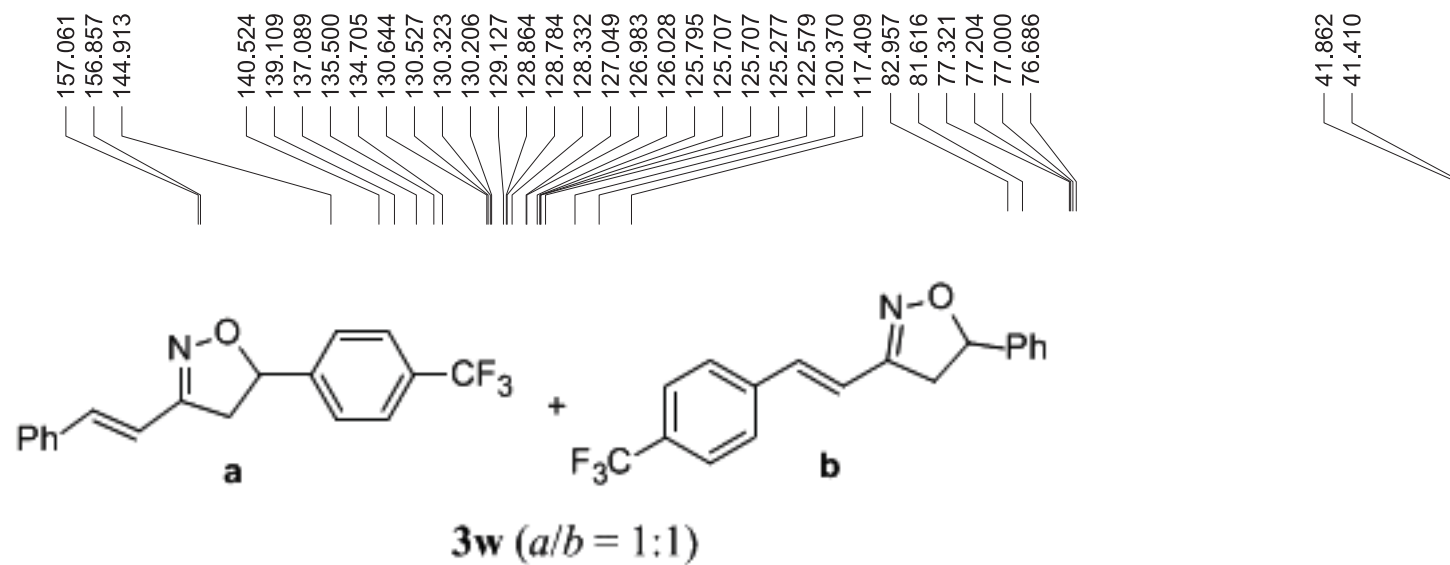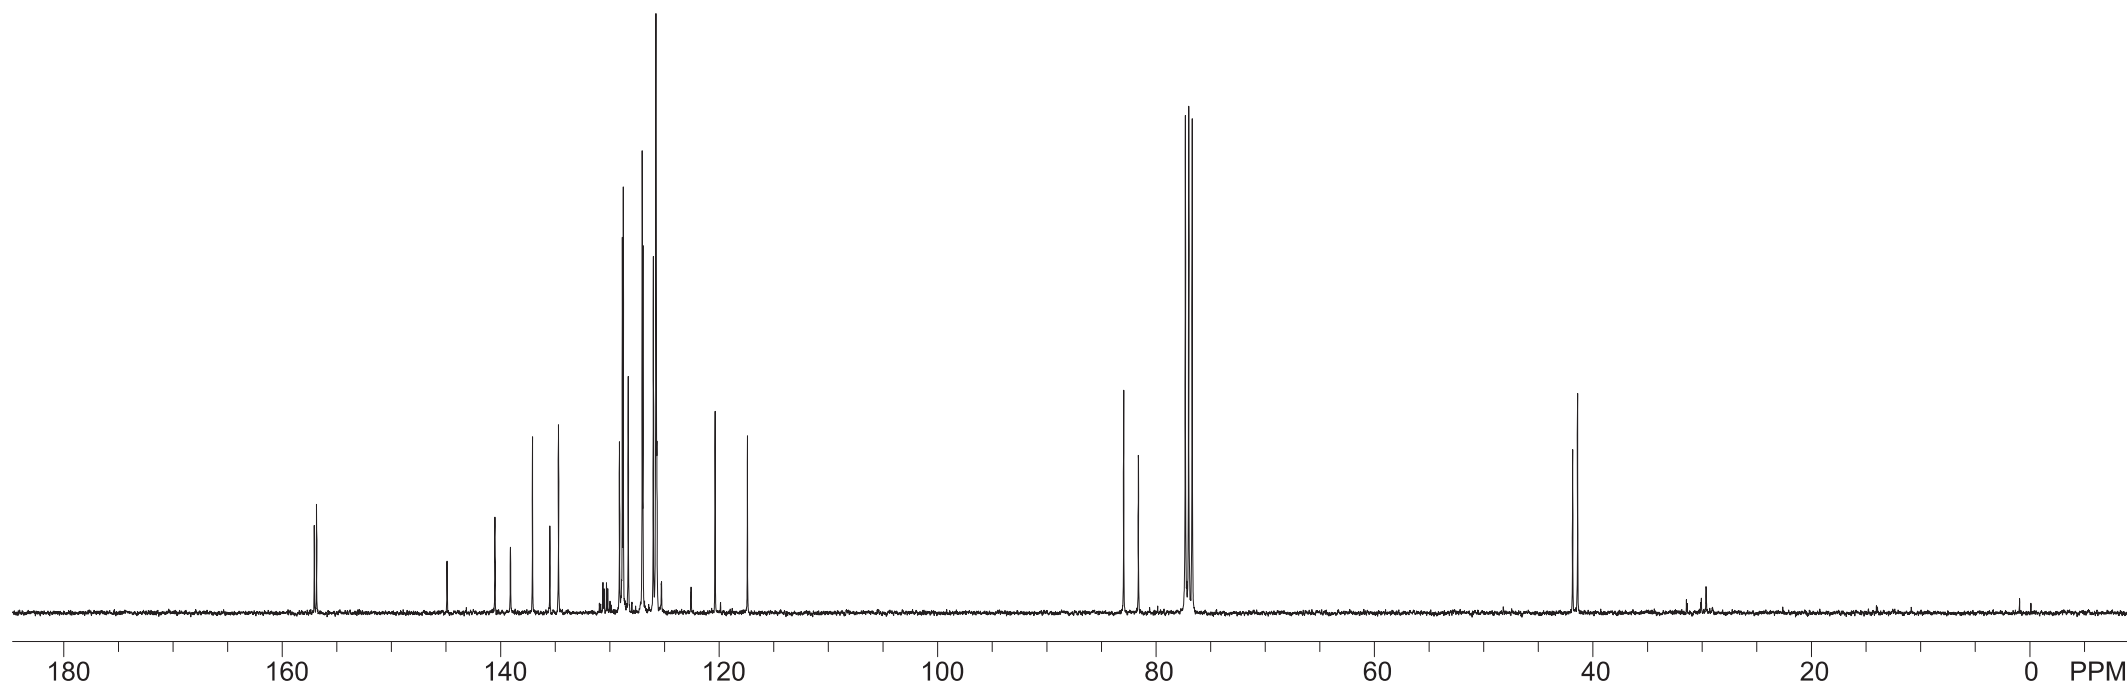

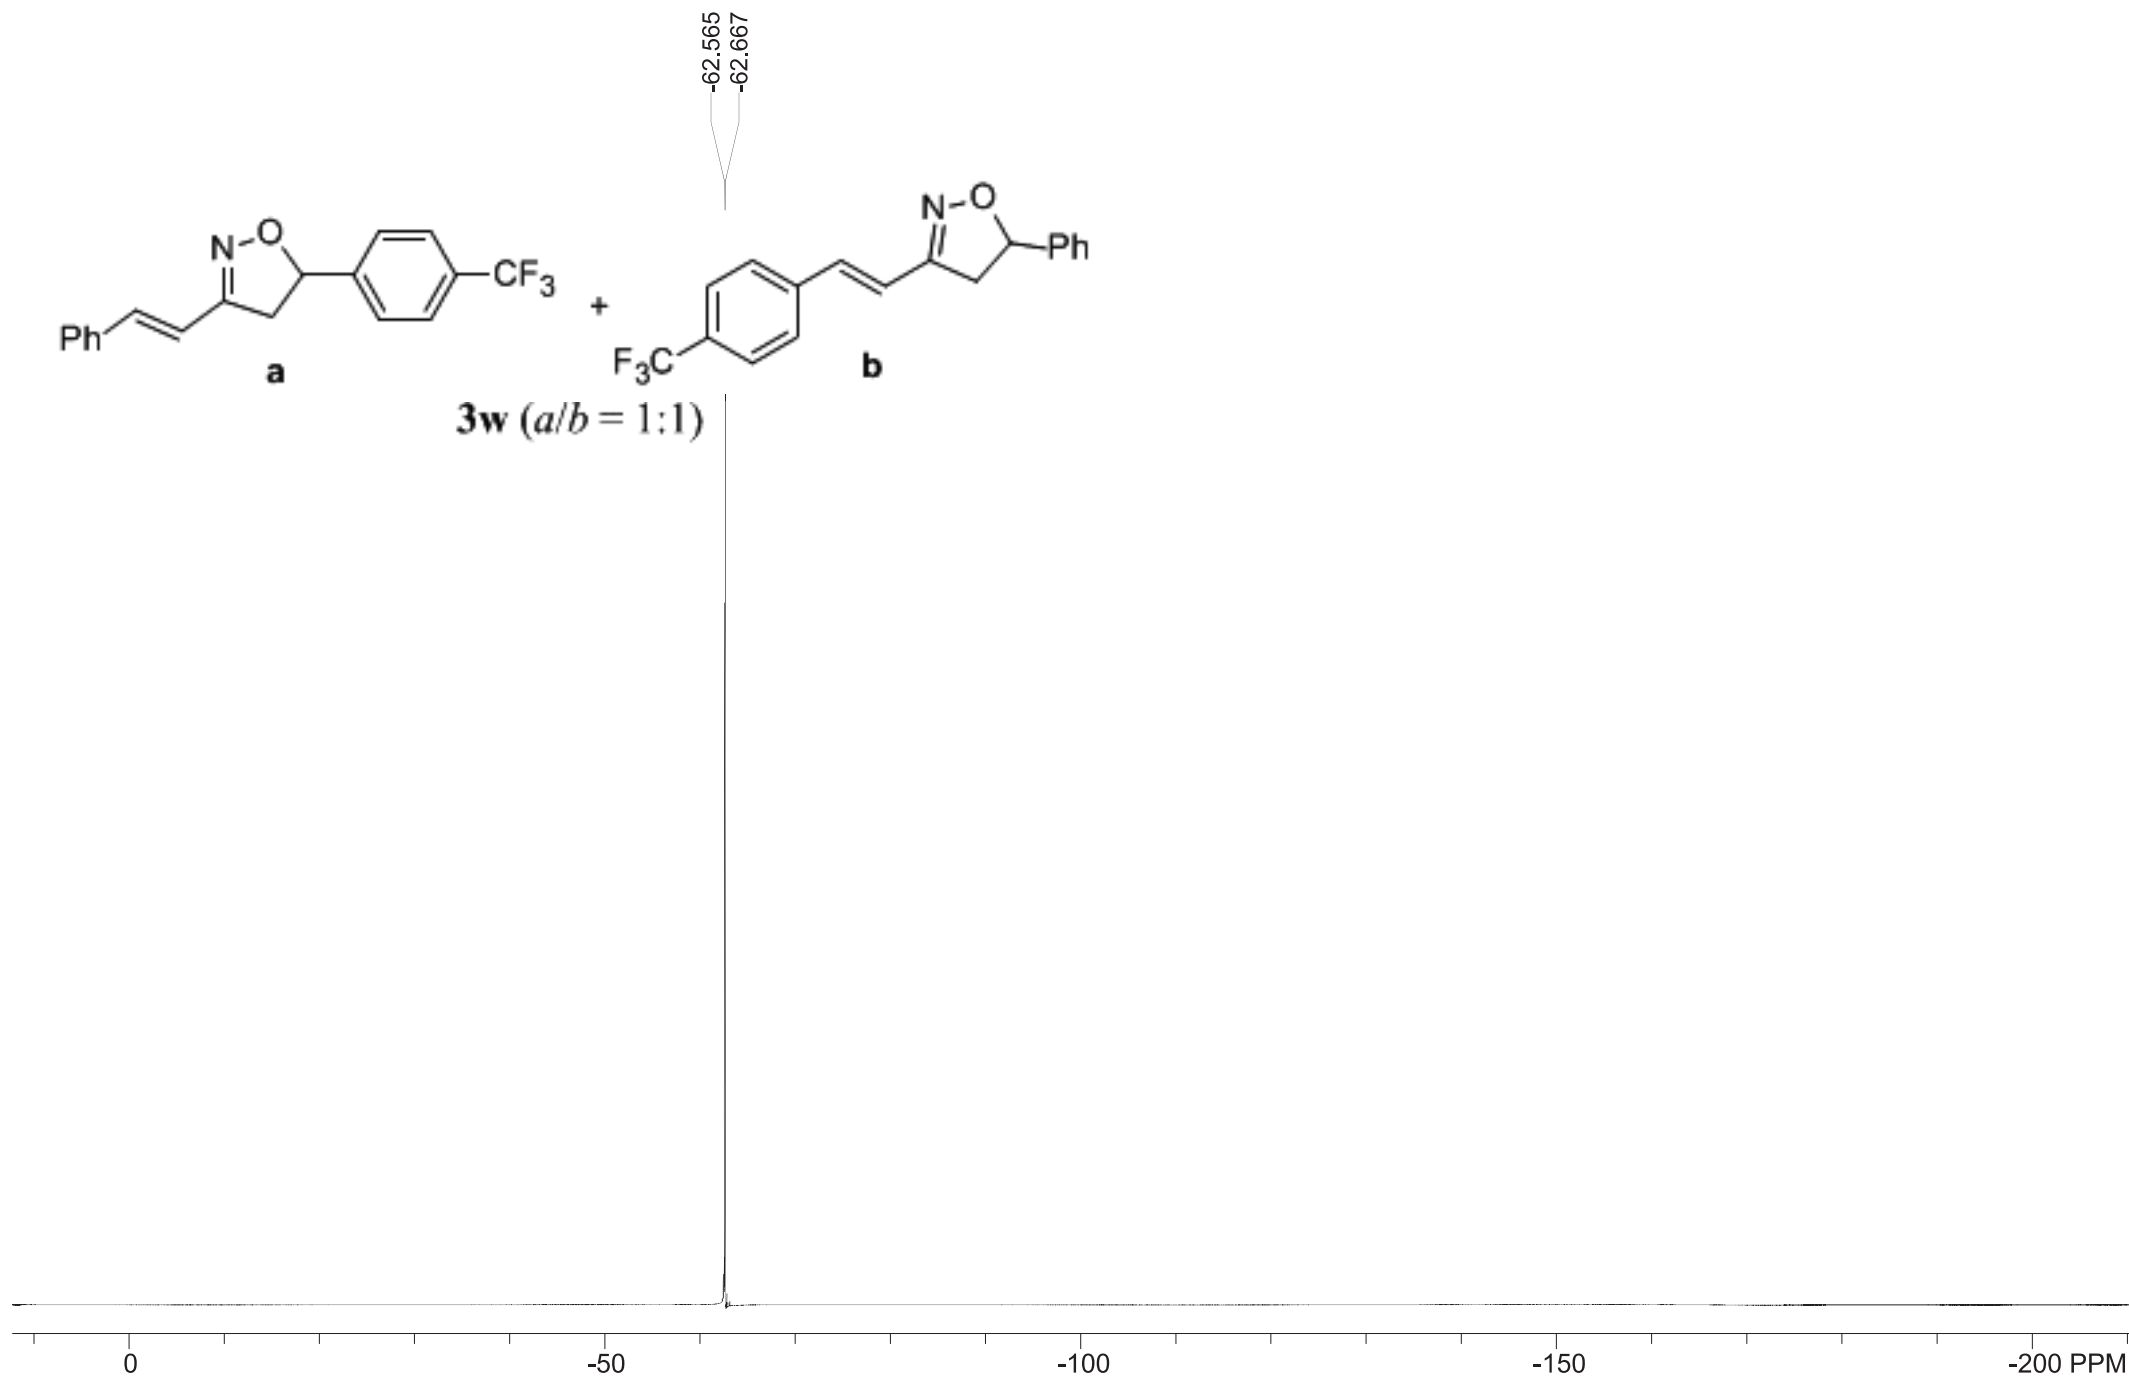

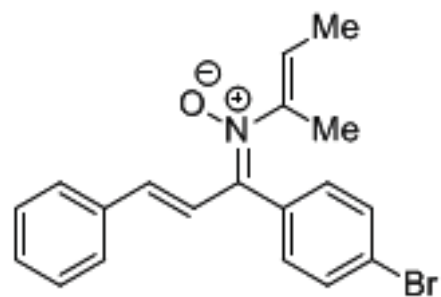

**1K** (*E/Z* = 8:1)

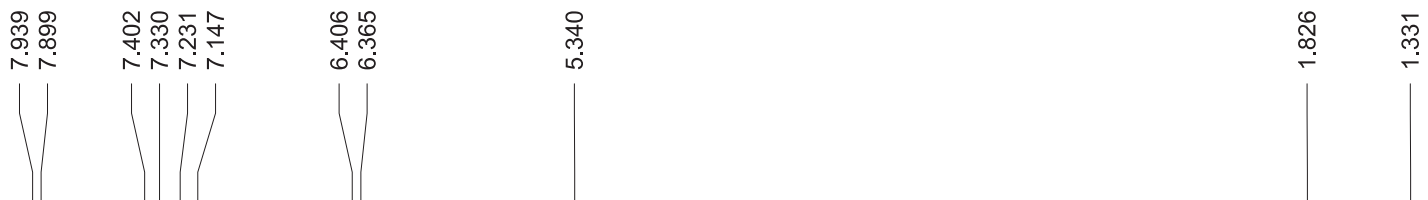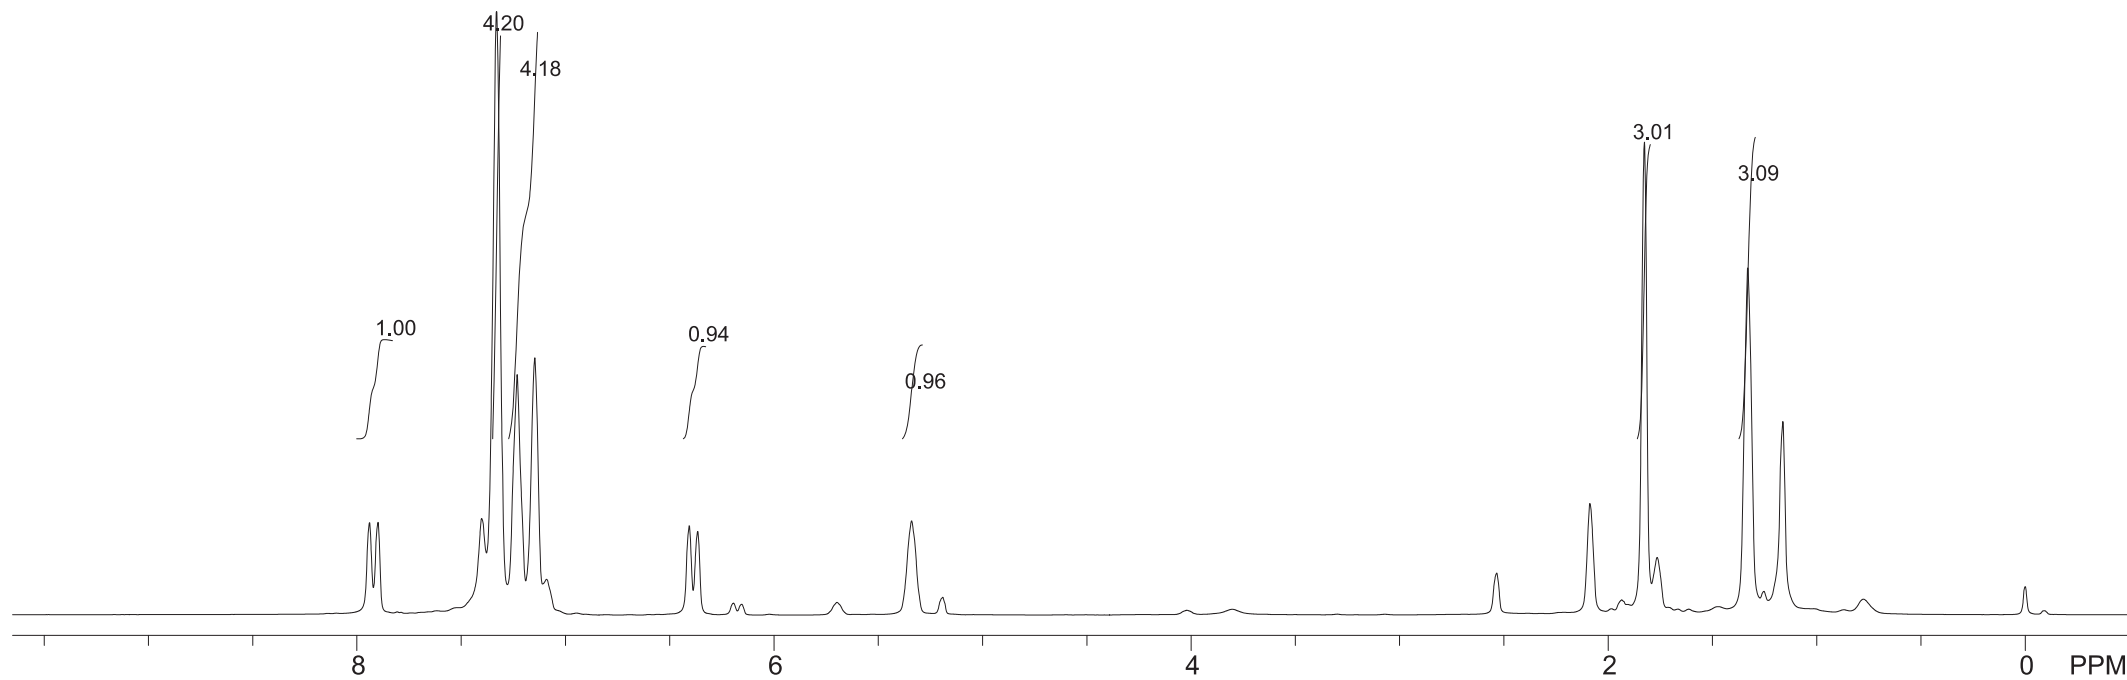



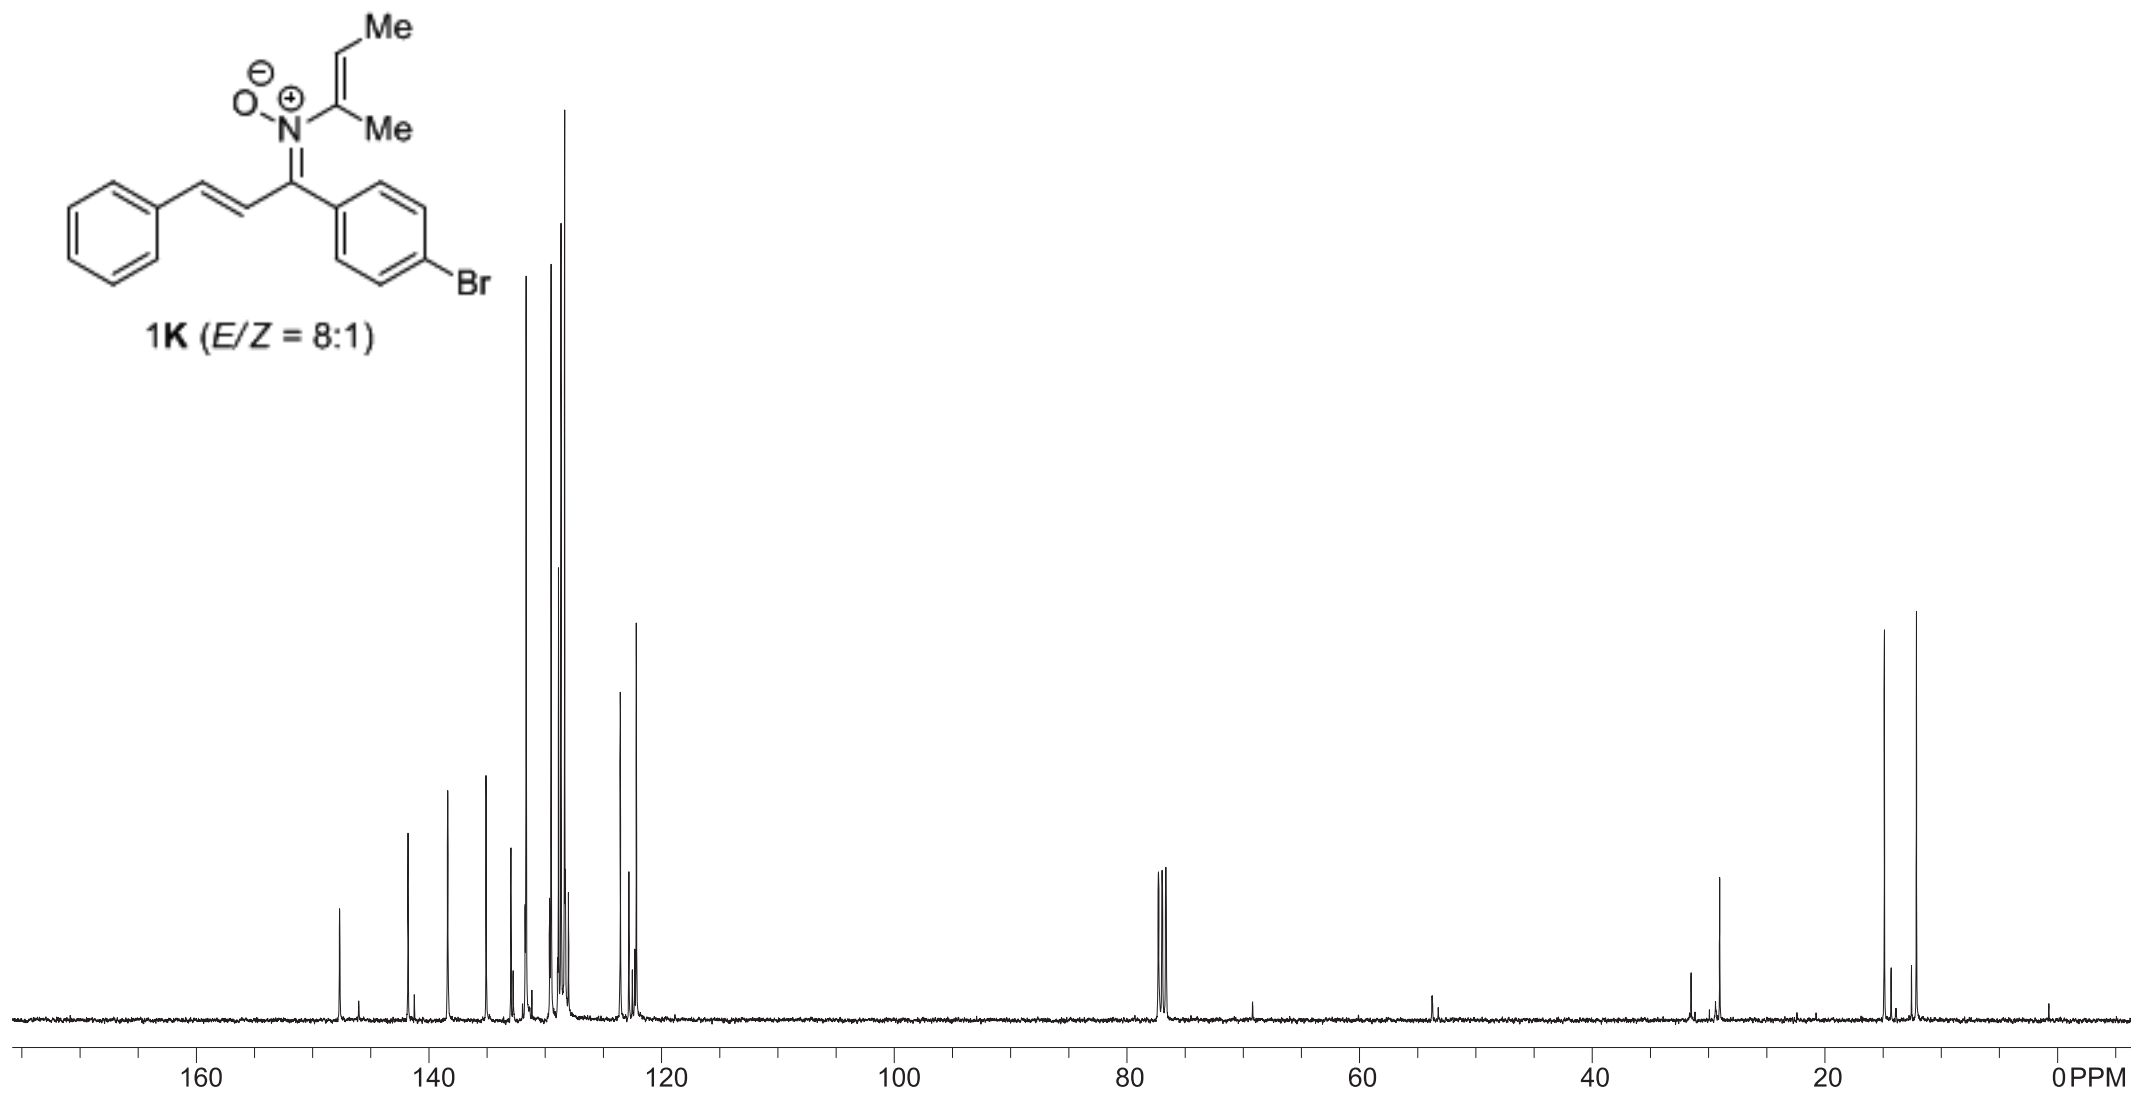

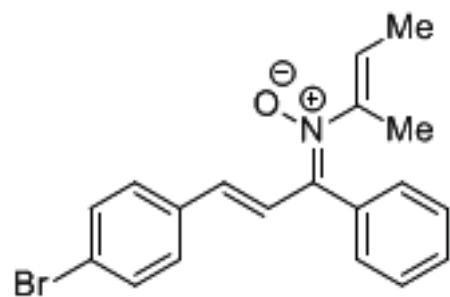

**1m** (*E/Z* = 8:1)

8.010  
7.969  
7.579  
7.559  
7.481  
7.464  
7.319  
7.300  
7.280  
7.137  
7.118  
6.533  
6.492

5.436  
5.420

1.921  
1.472  
1.456

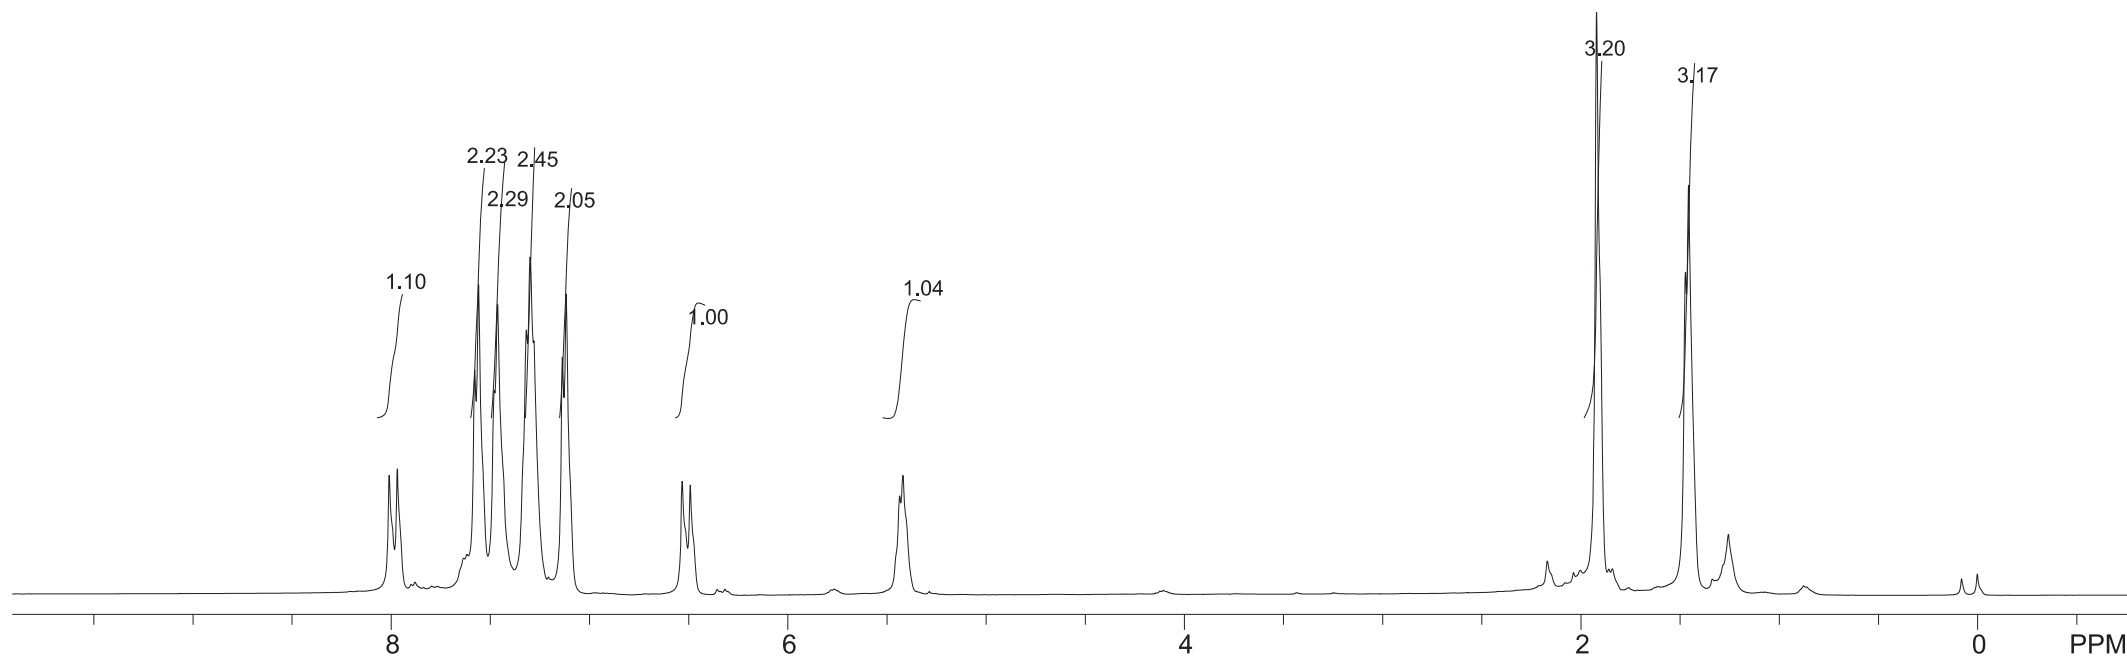

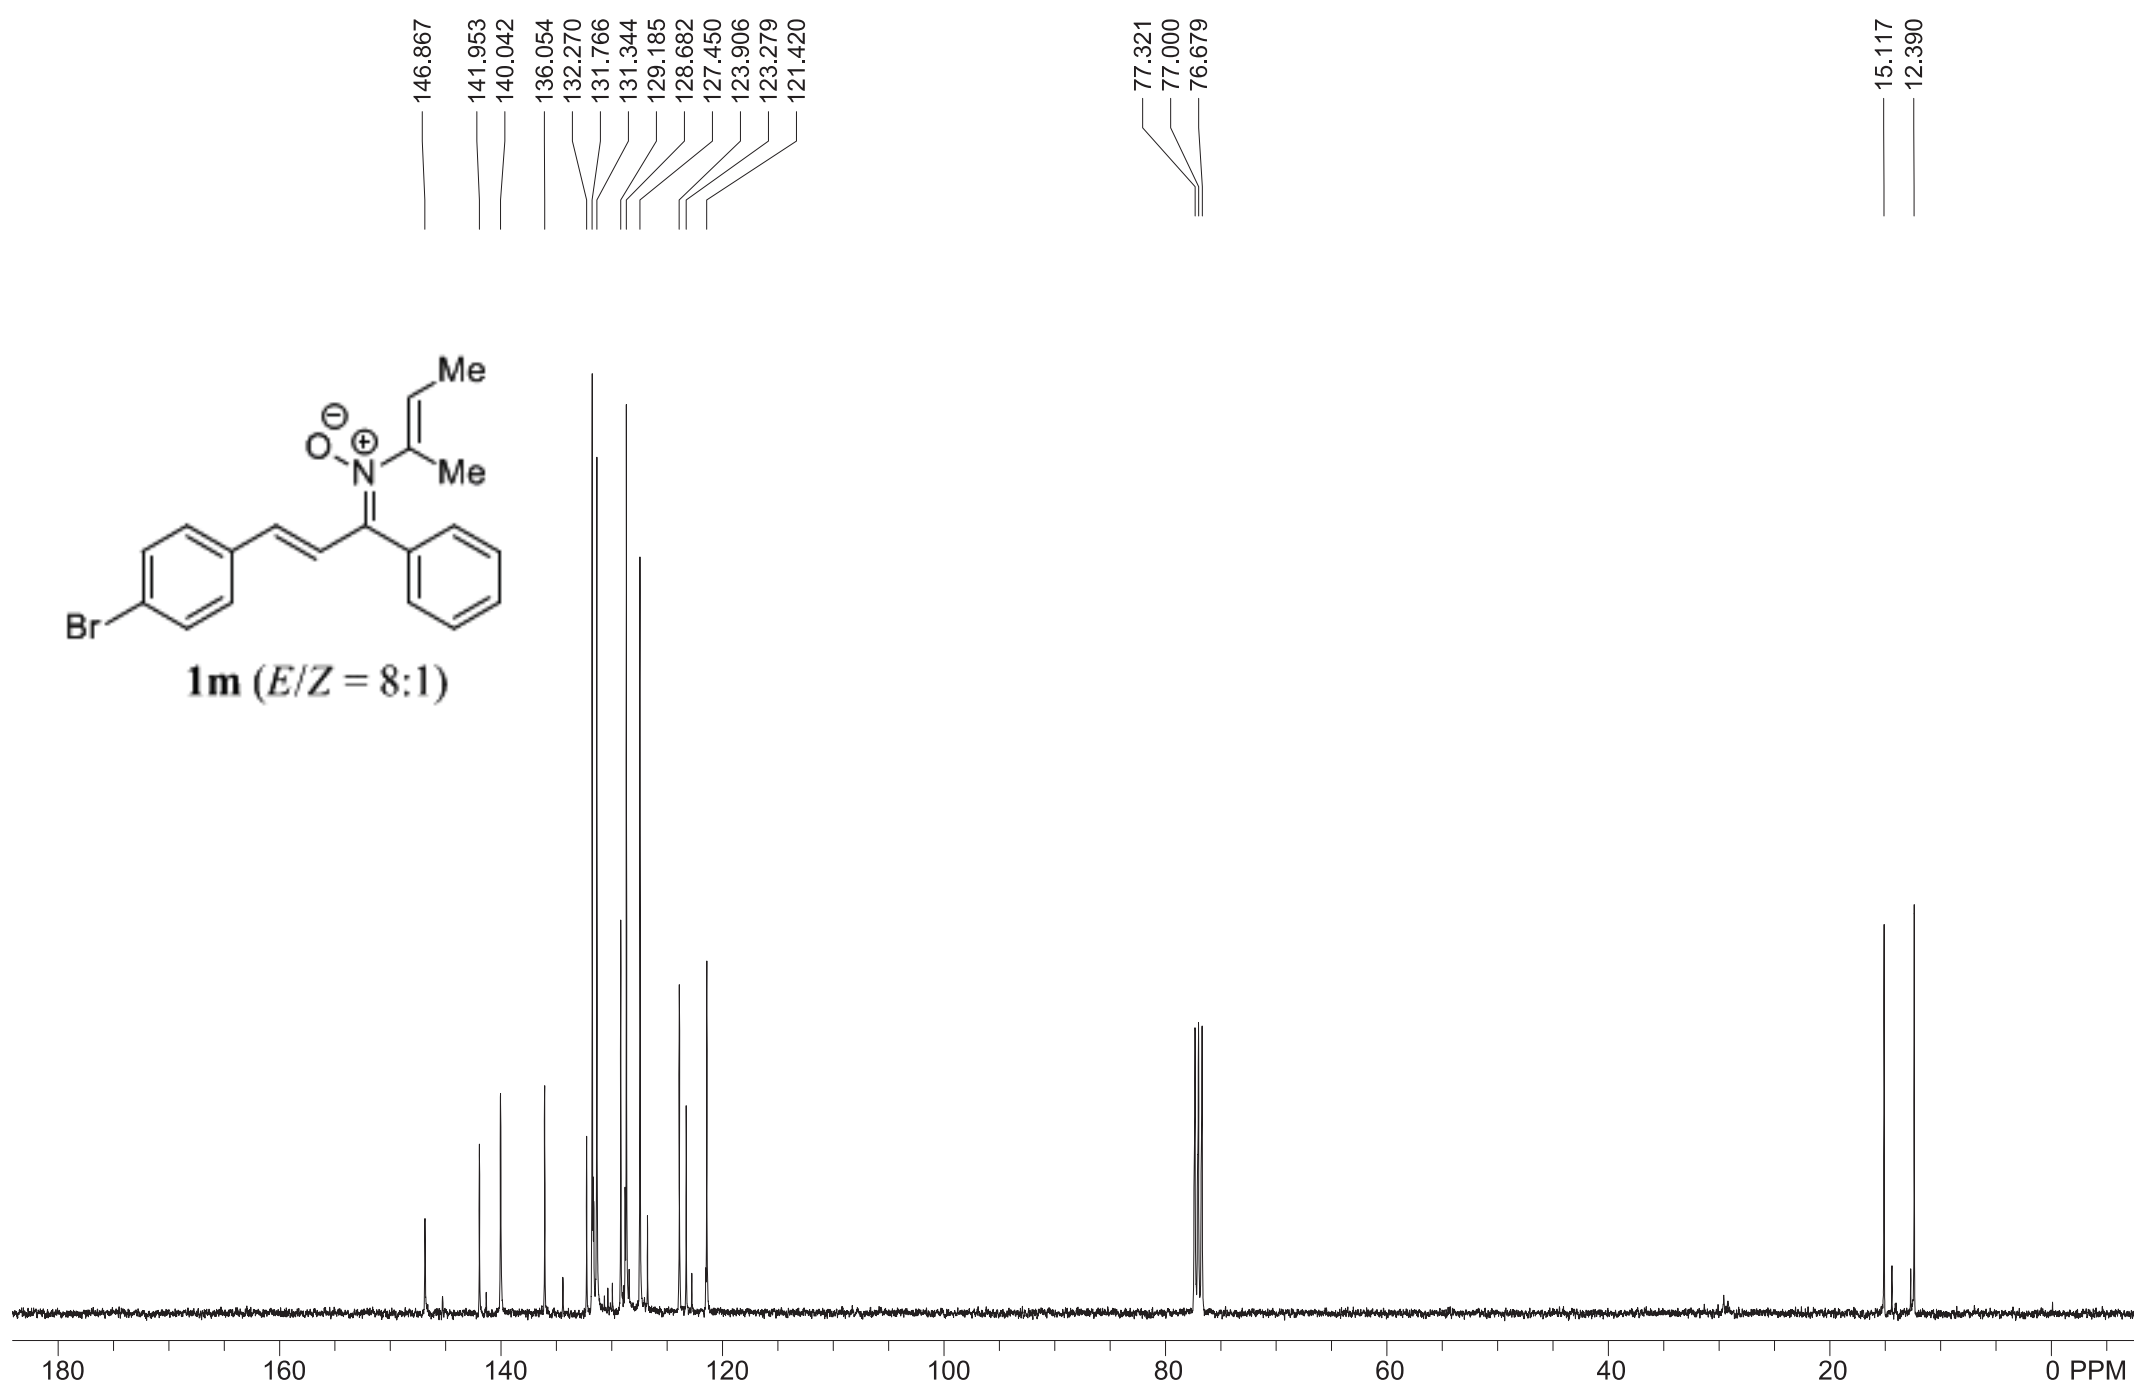

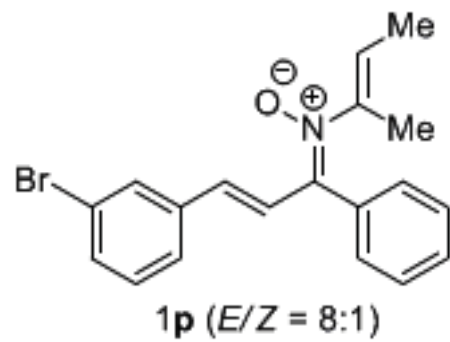

7.937  
 7.894  
 7.852  
 7.503  
 7.441  
 7.415  
 7.403  
 7.335  
 7.294  
 7.242  
 7.217  
 7.140  
 7.112  
 7.039  
 7.020  
 6.401  
 6.352  
 6.310  
 5.327  
 5.313  
 5.297

1.832  
 1.786  
 1.337  
 1.295  
 1.280

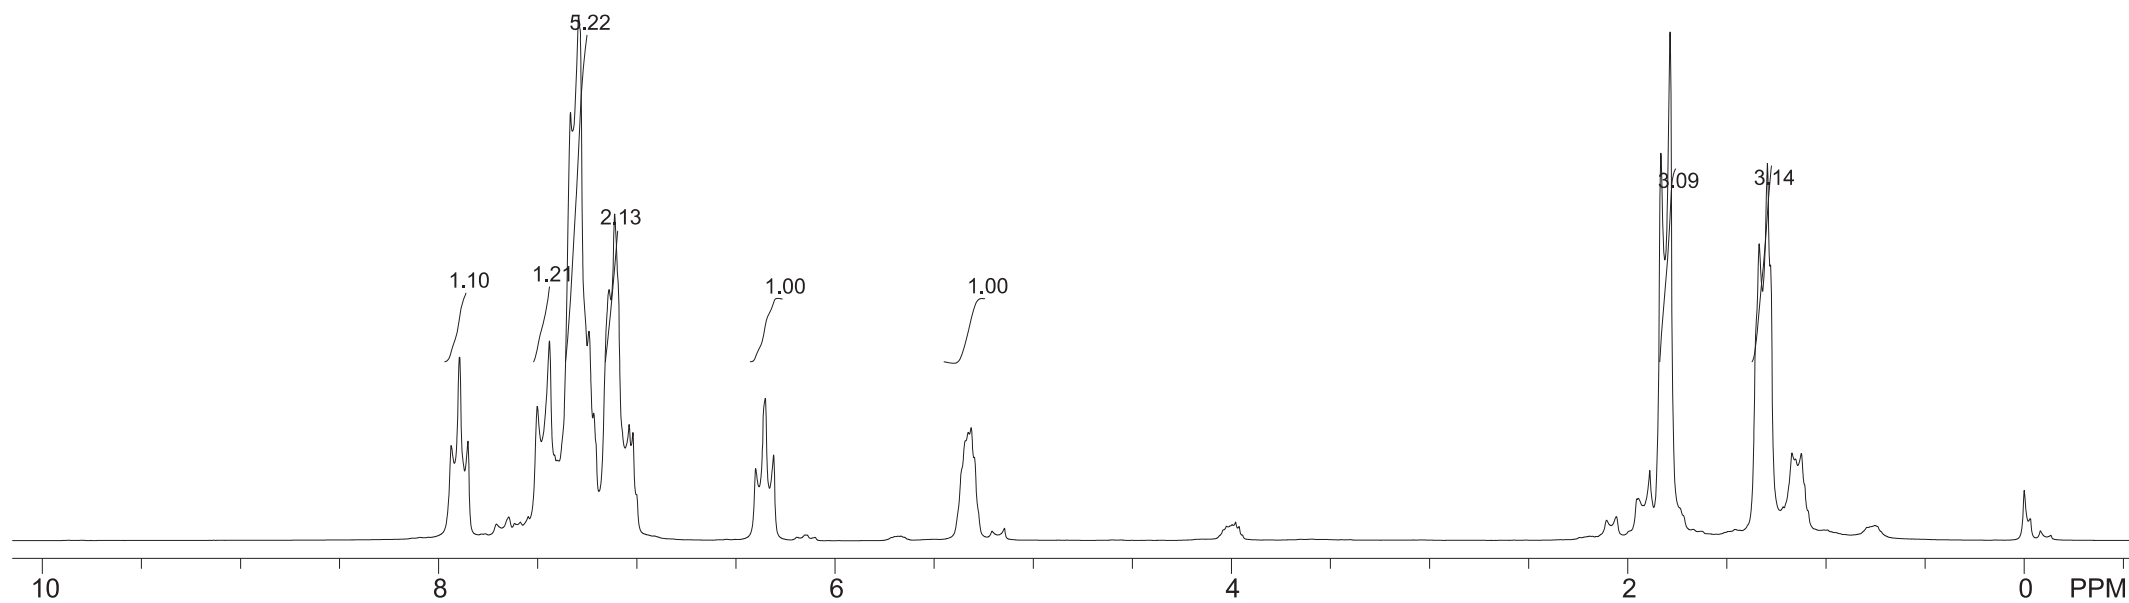

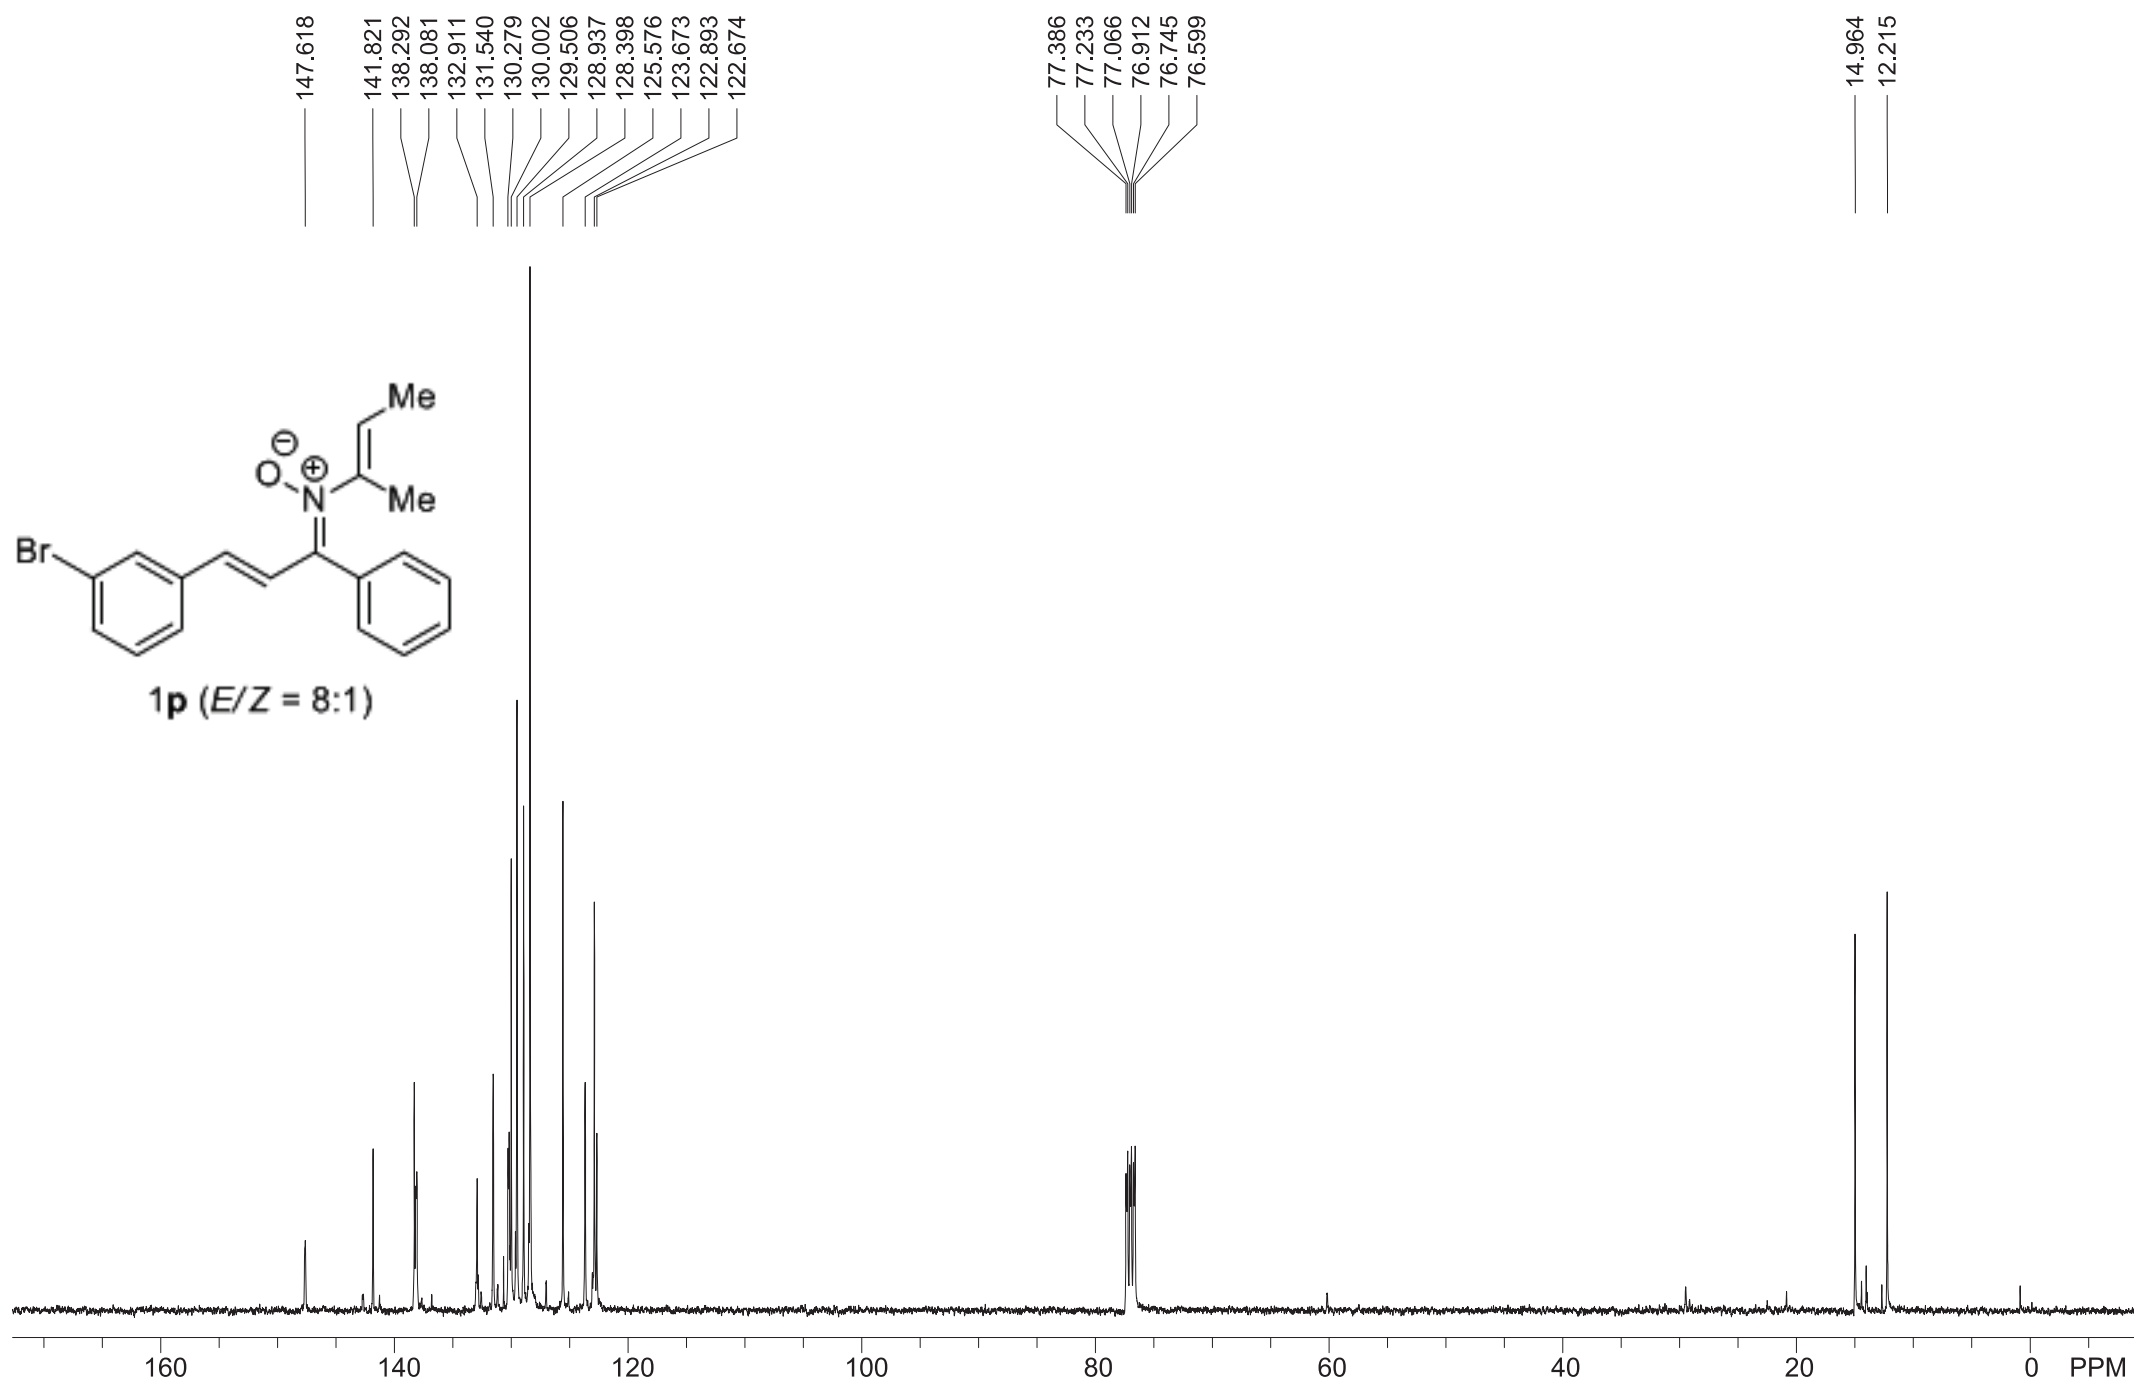

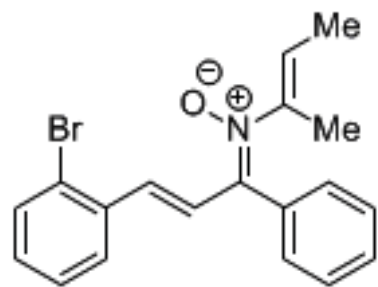

**1q** ( $E/Z = 8:1$ )

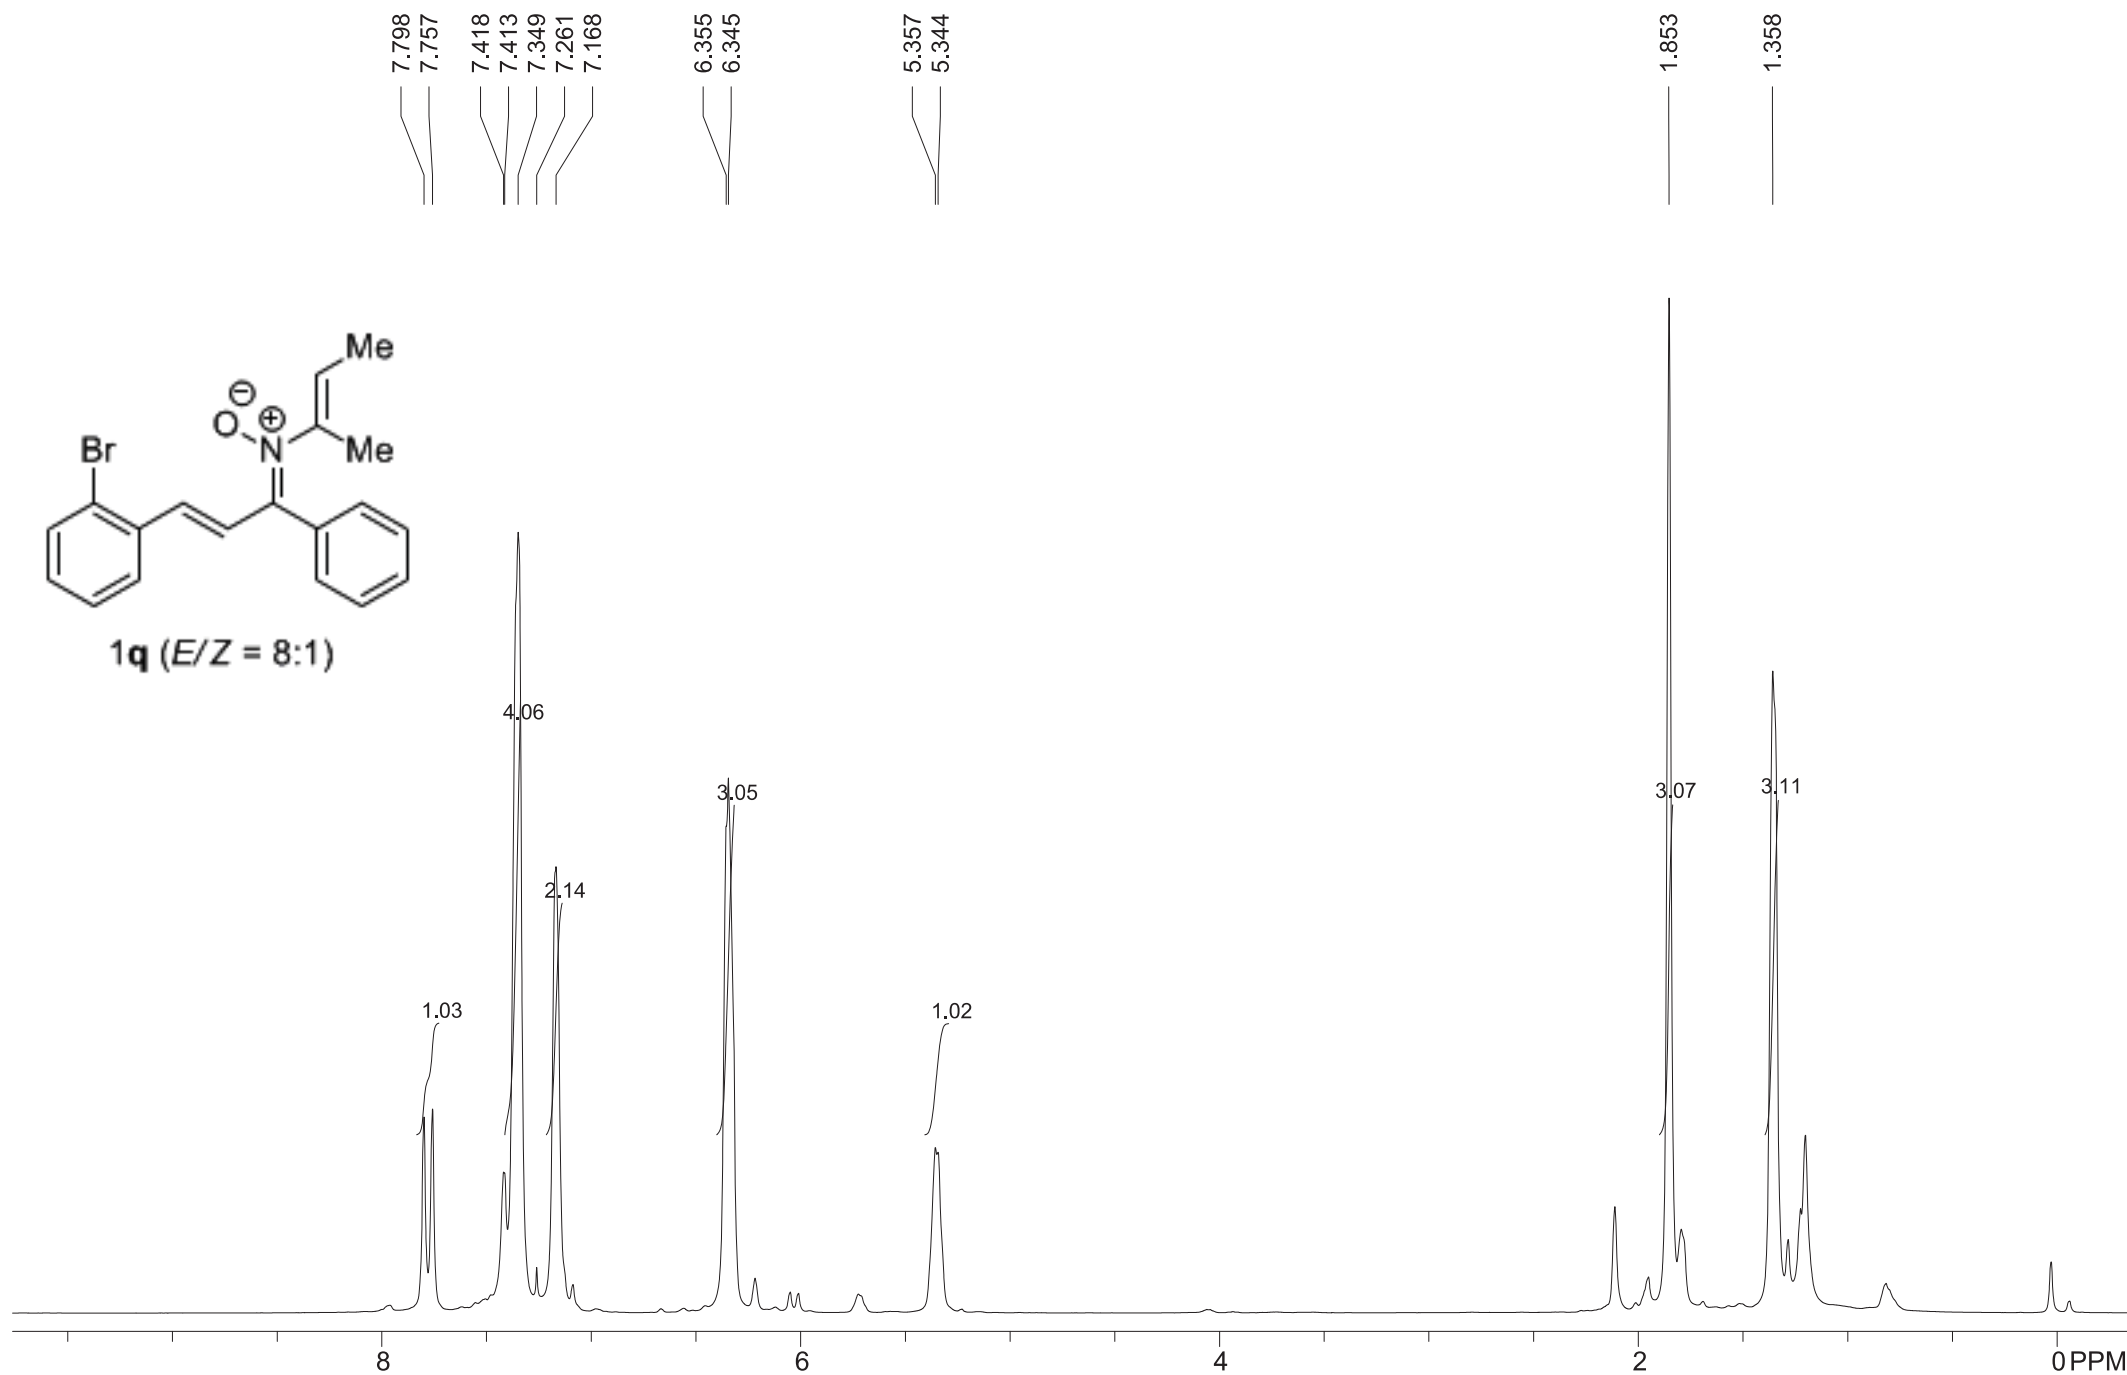

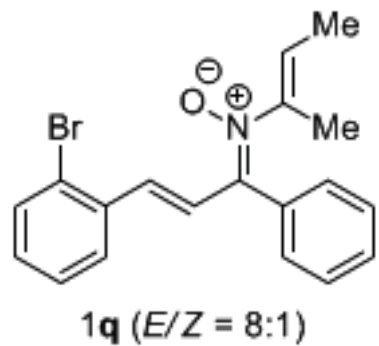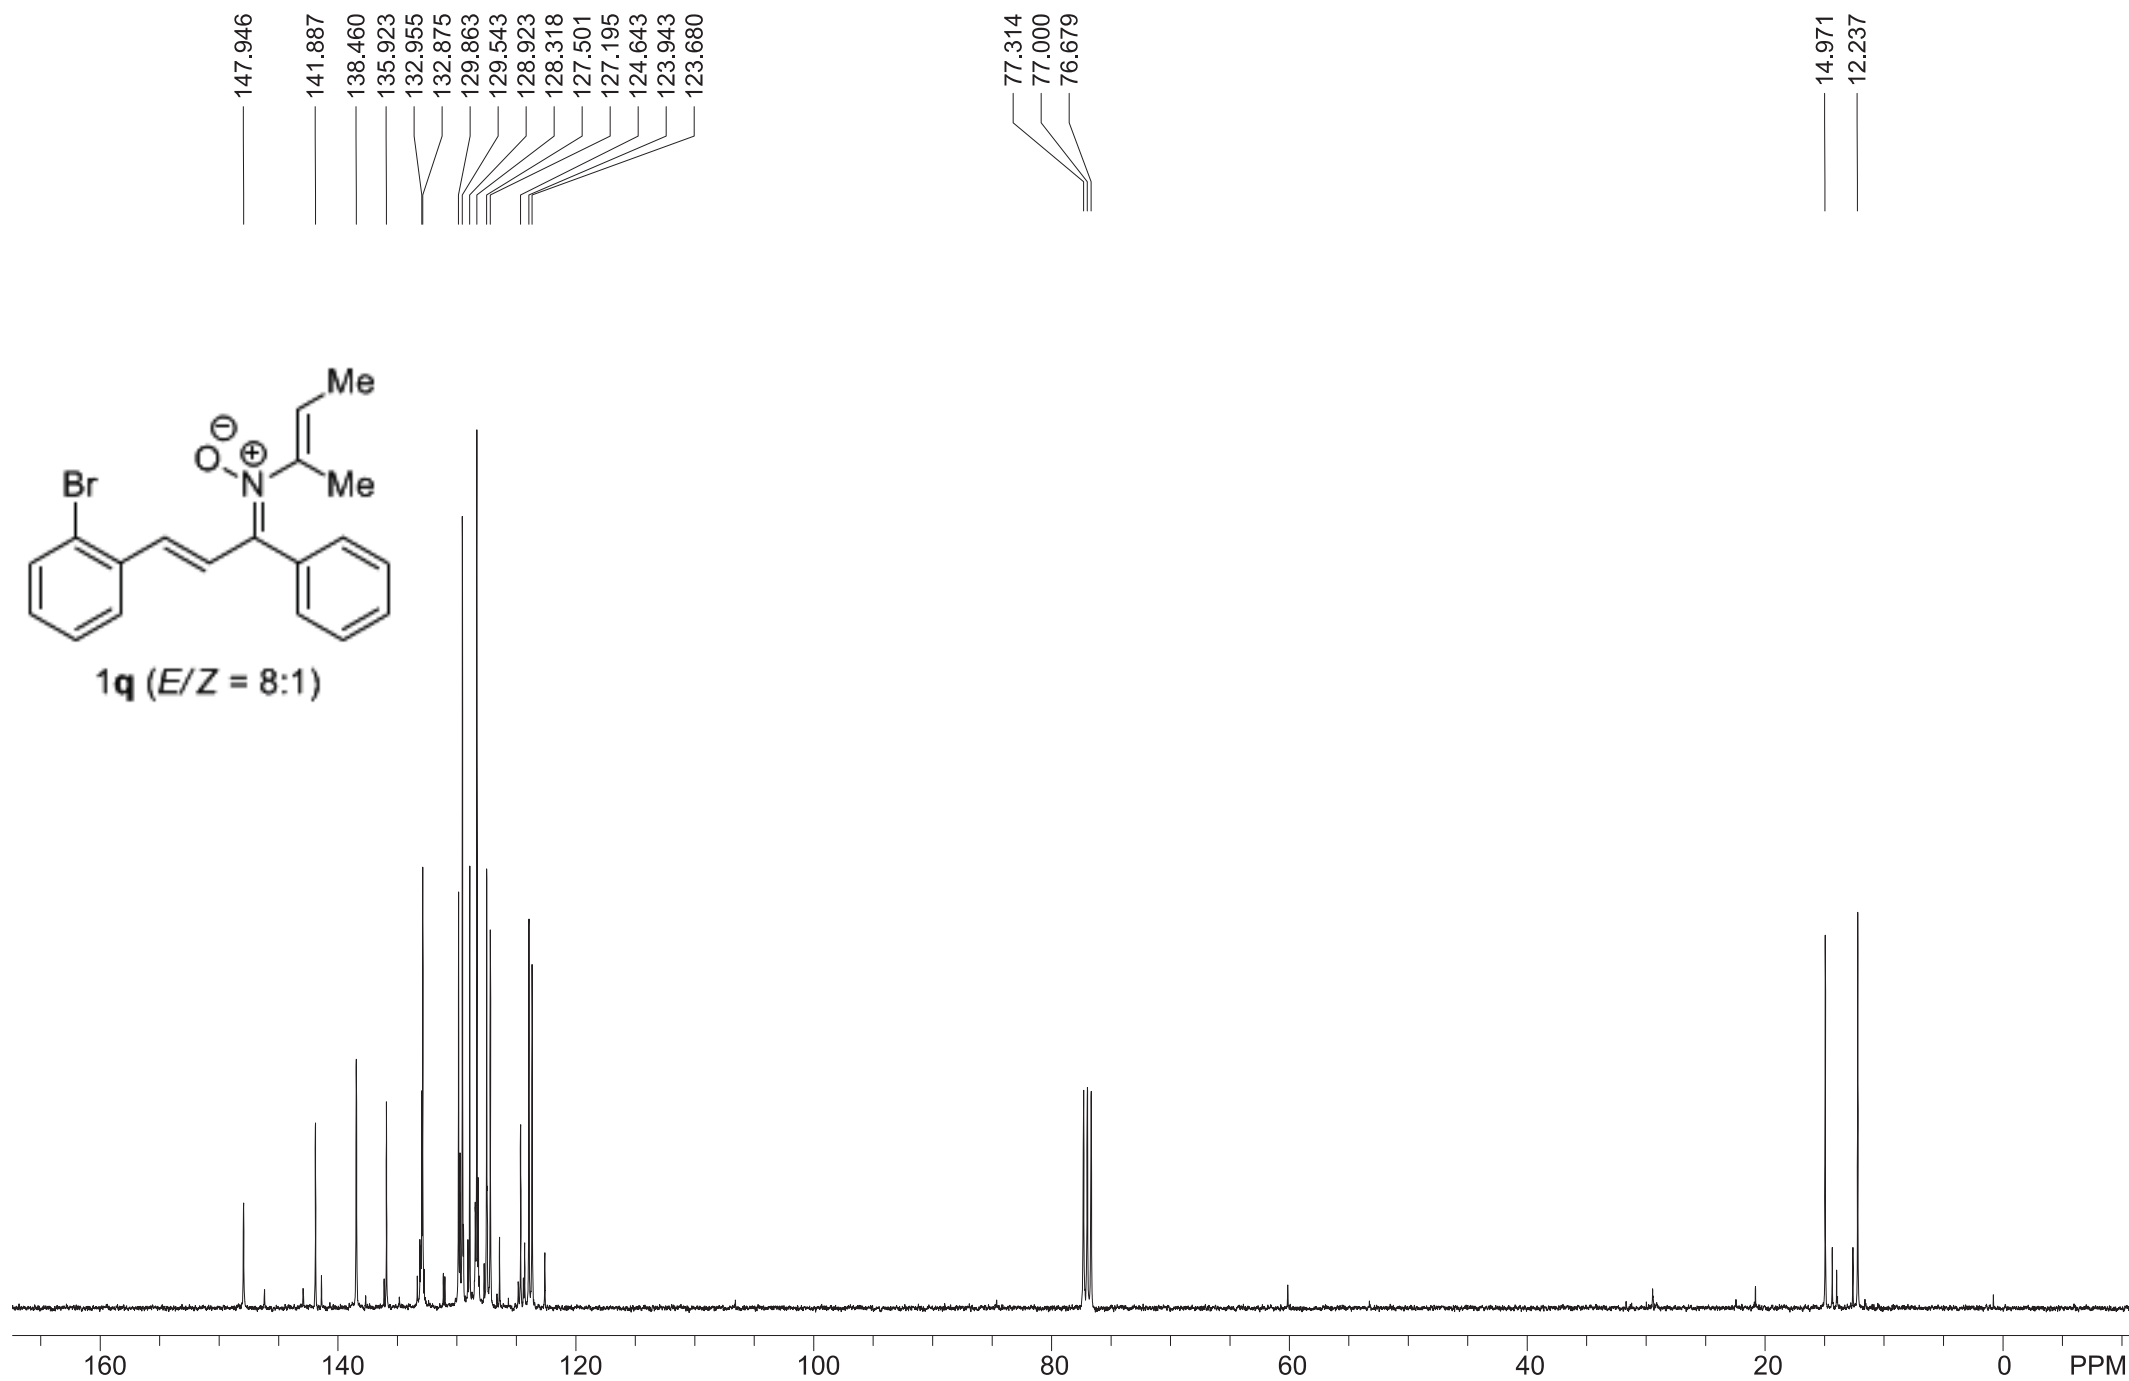

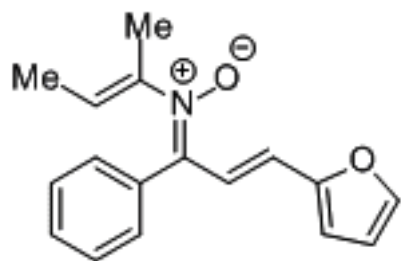

1r (*E/Z* = 5:1)

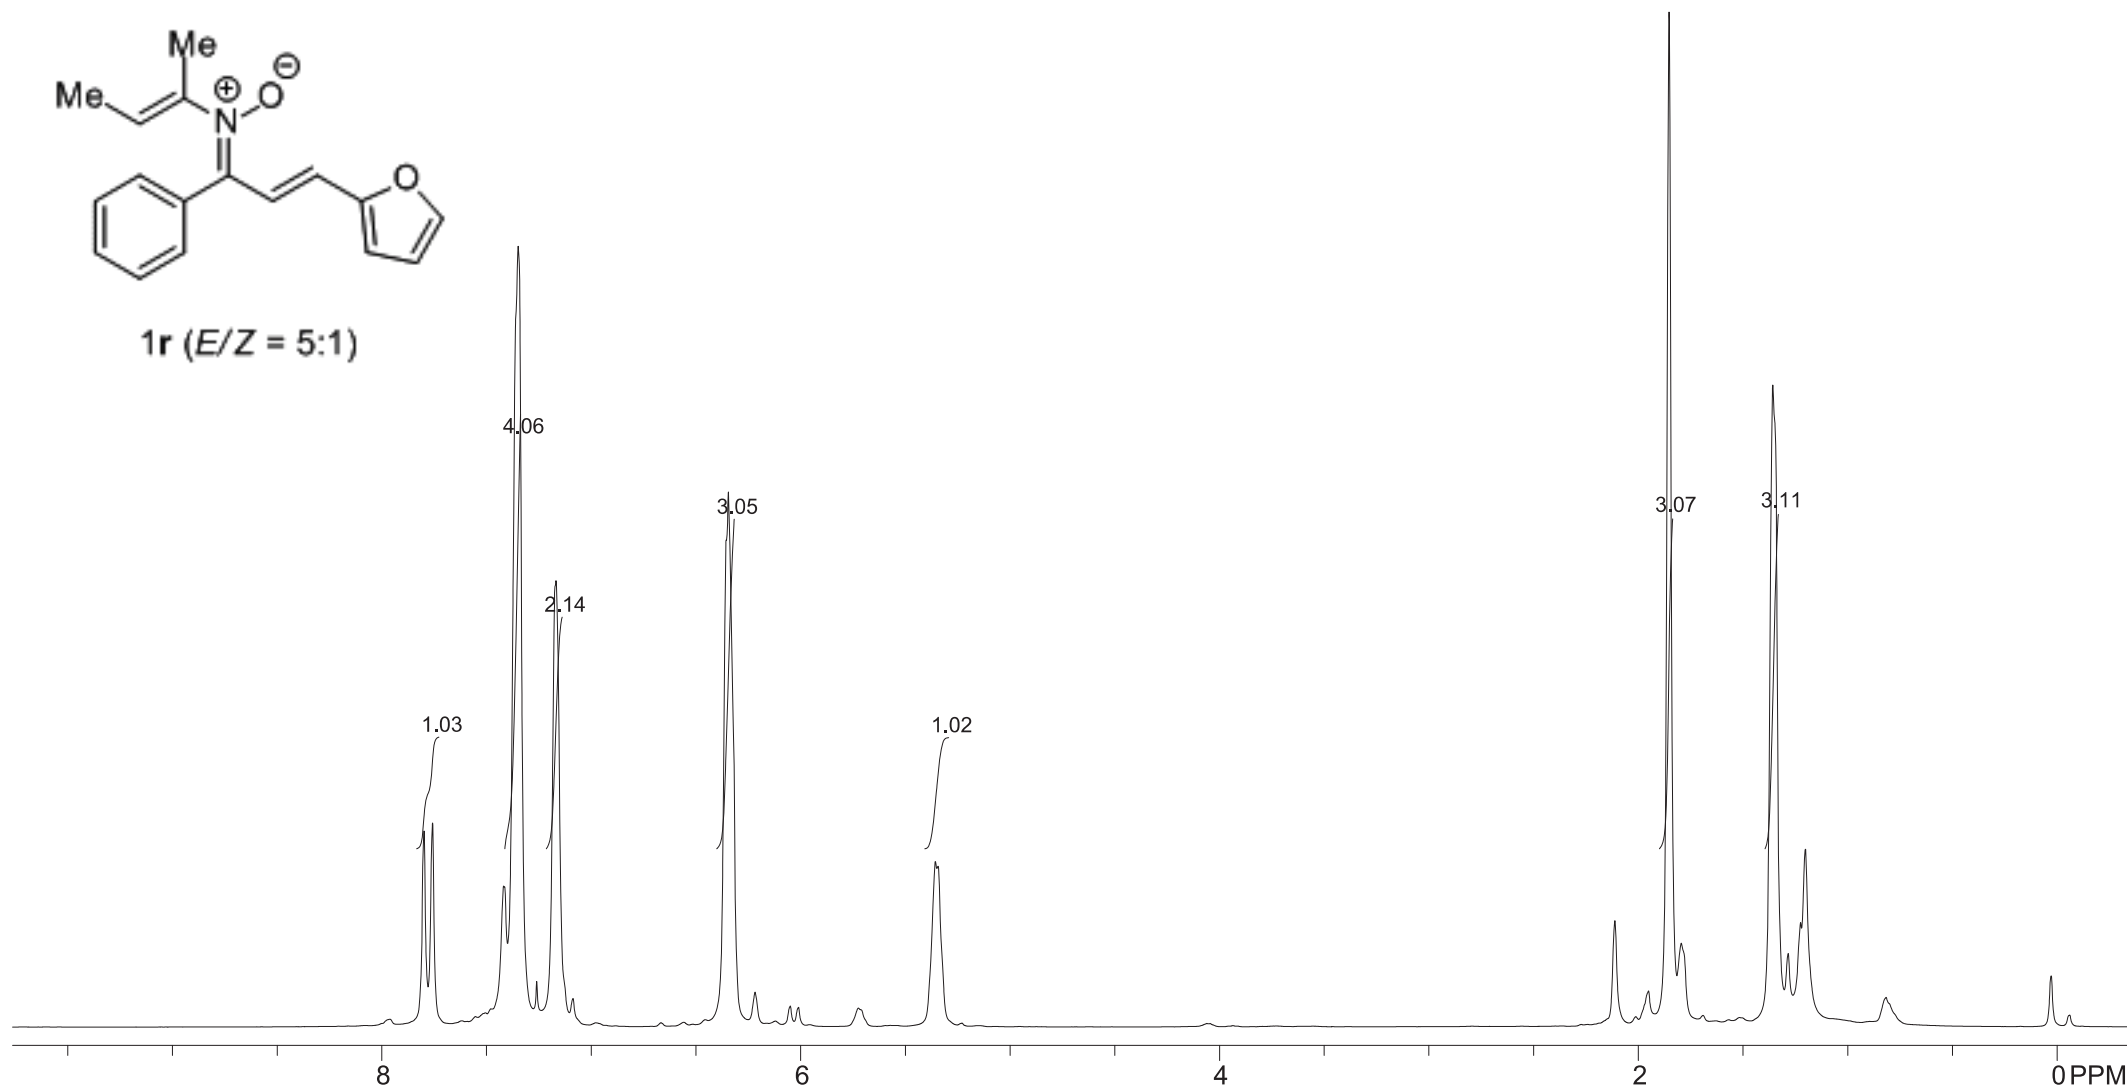



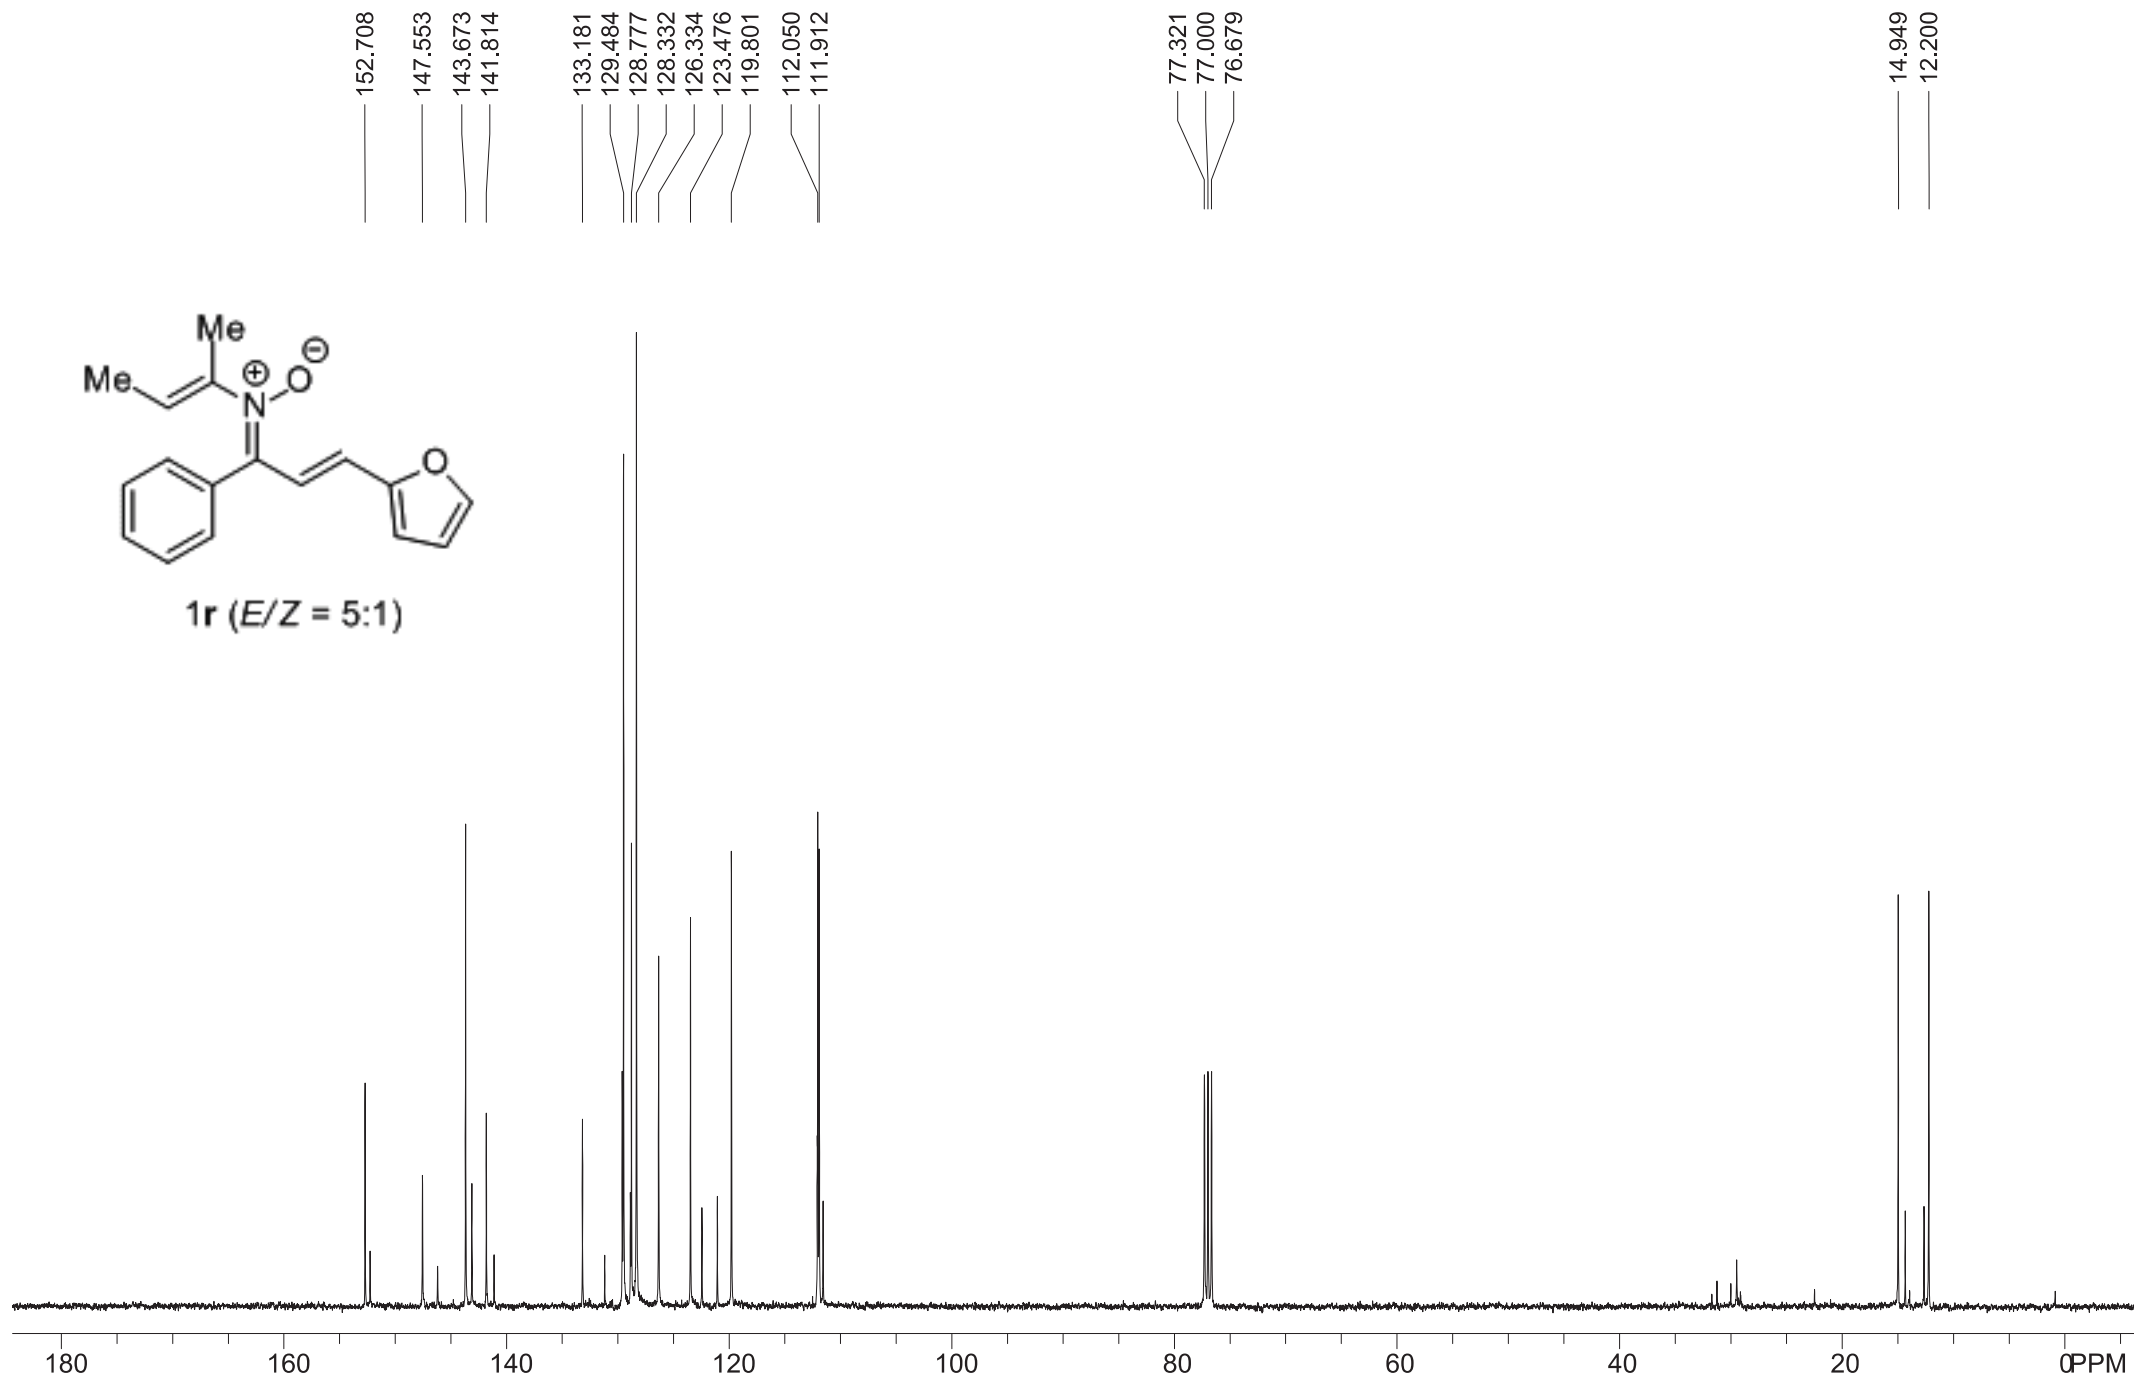

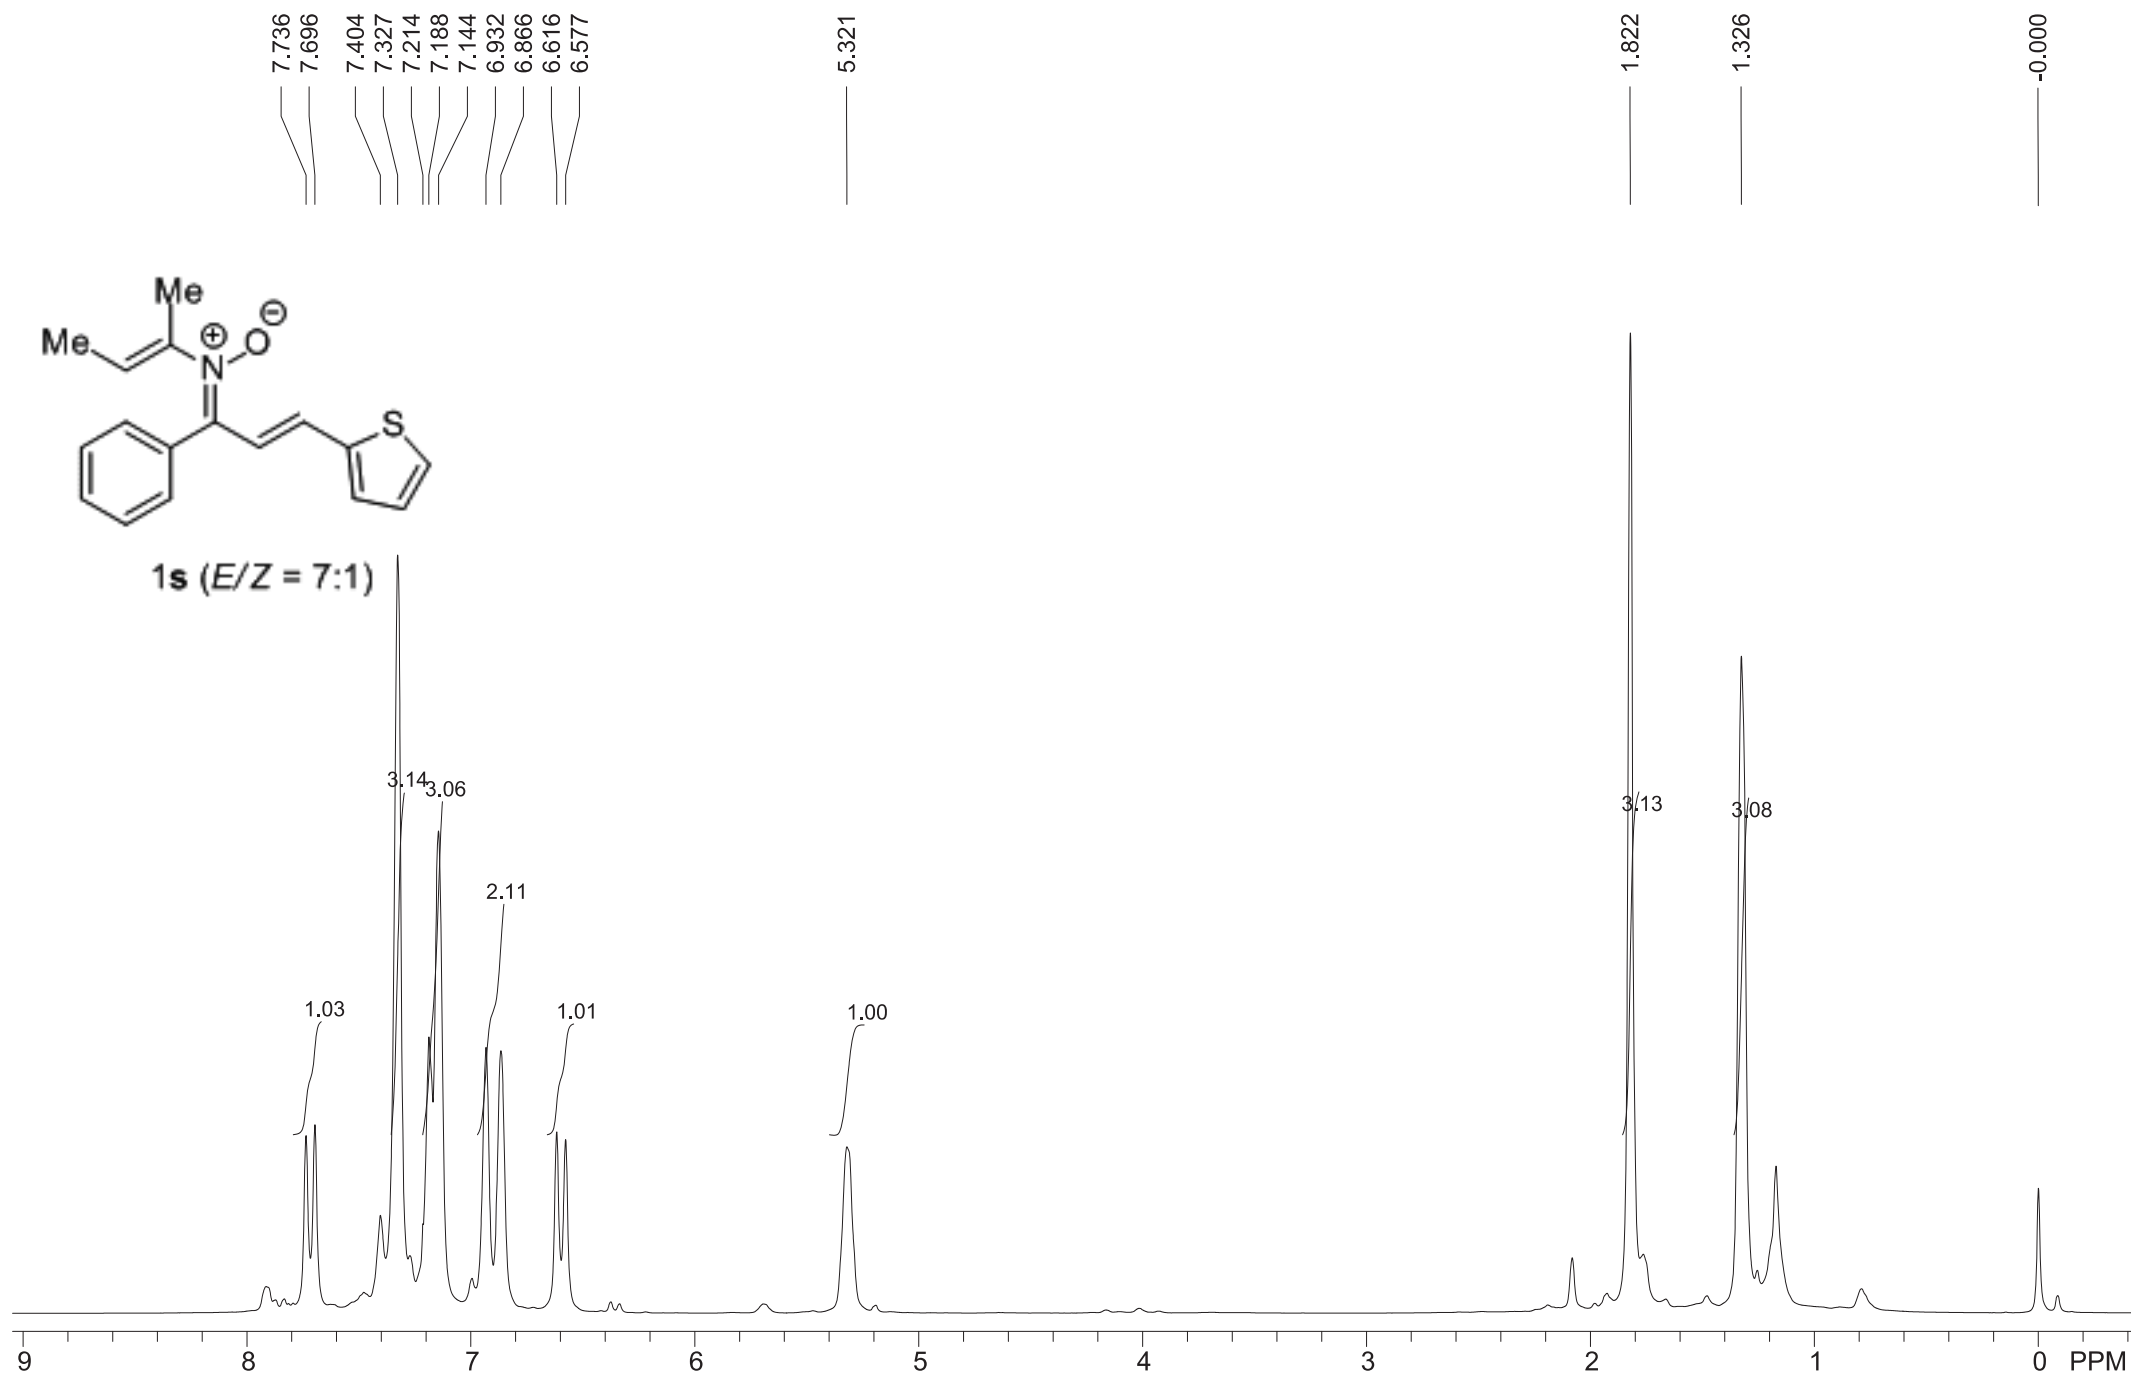

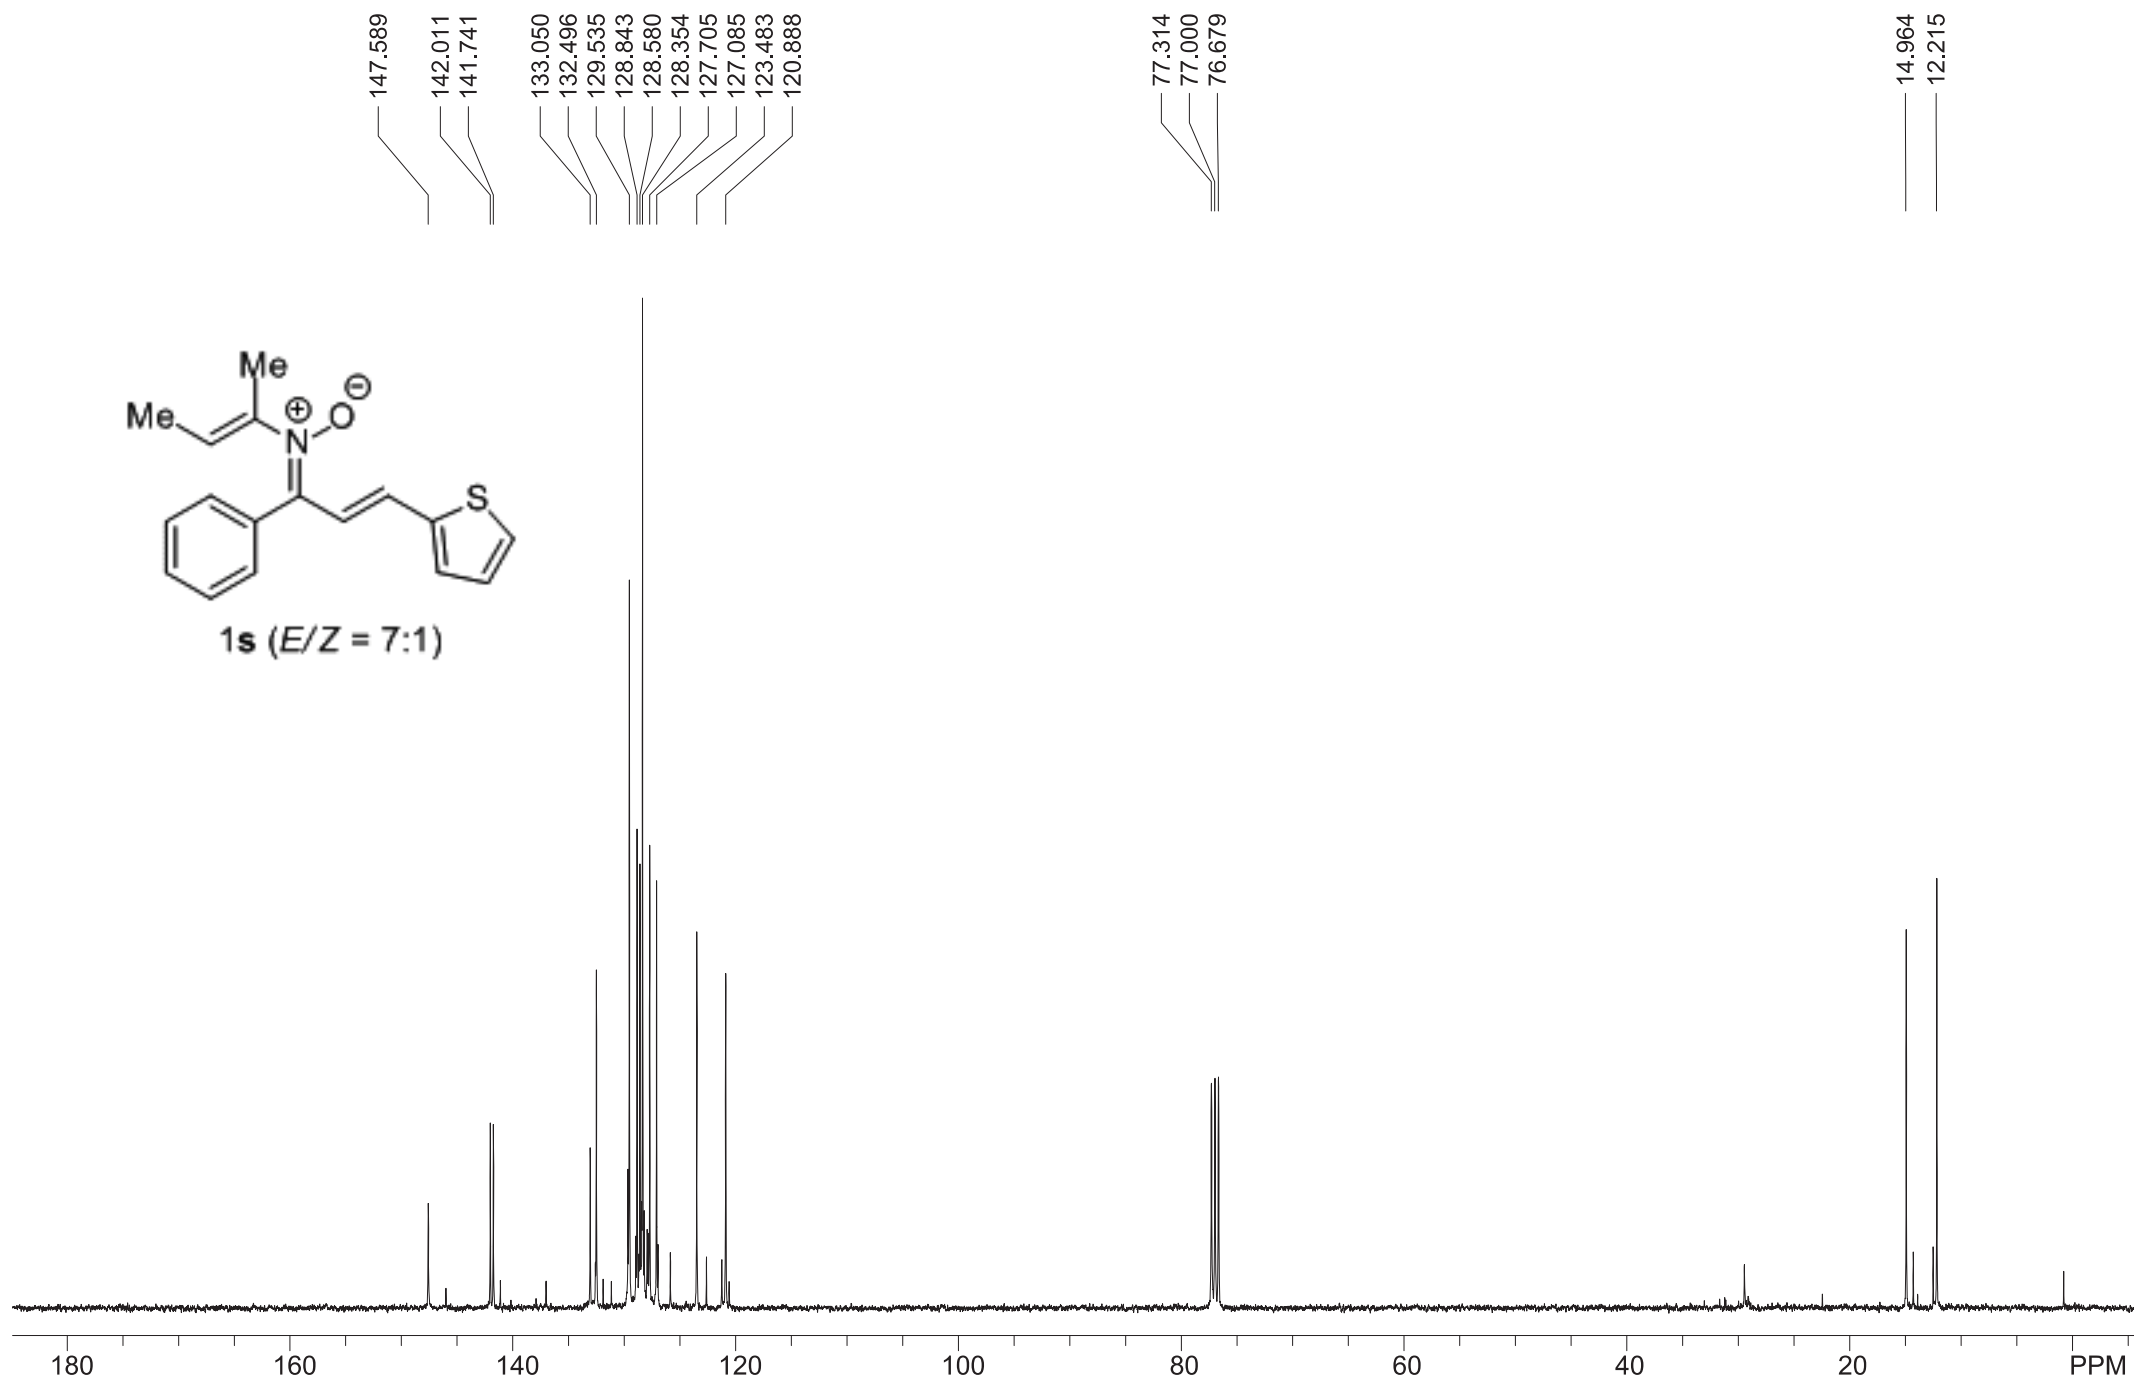

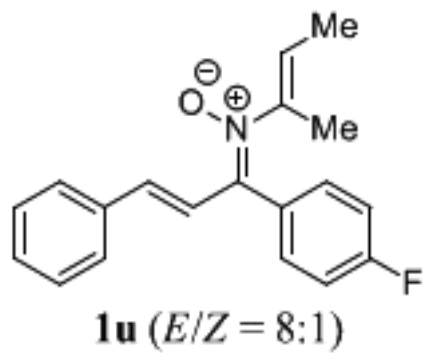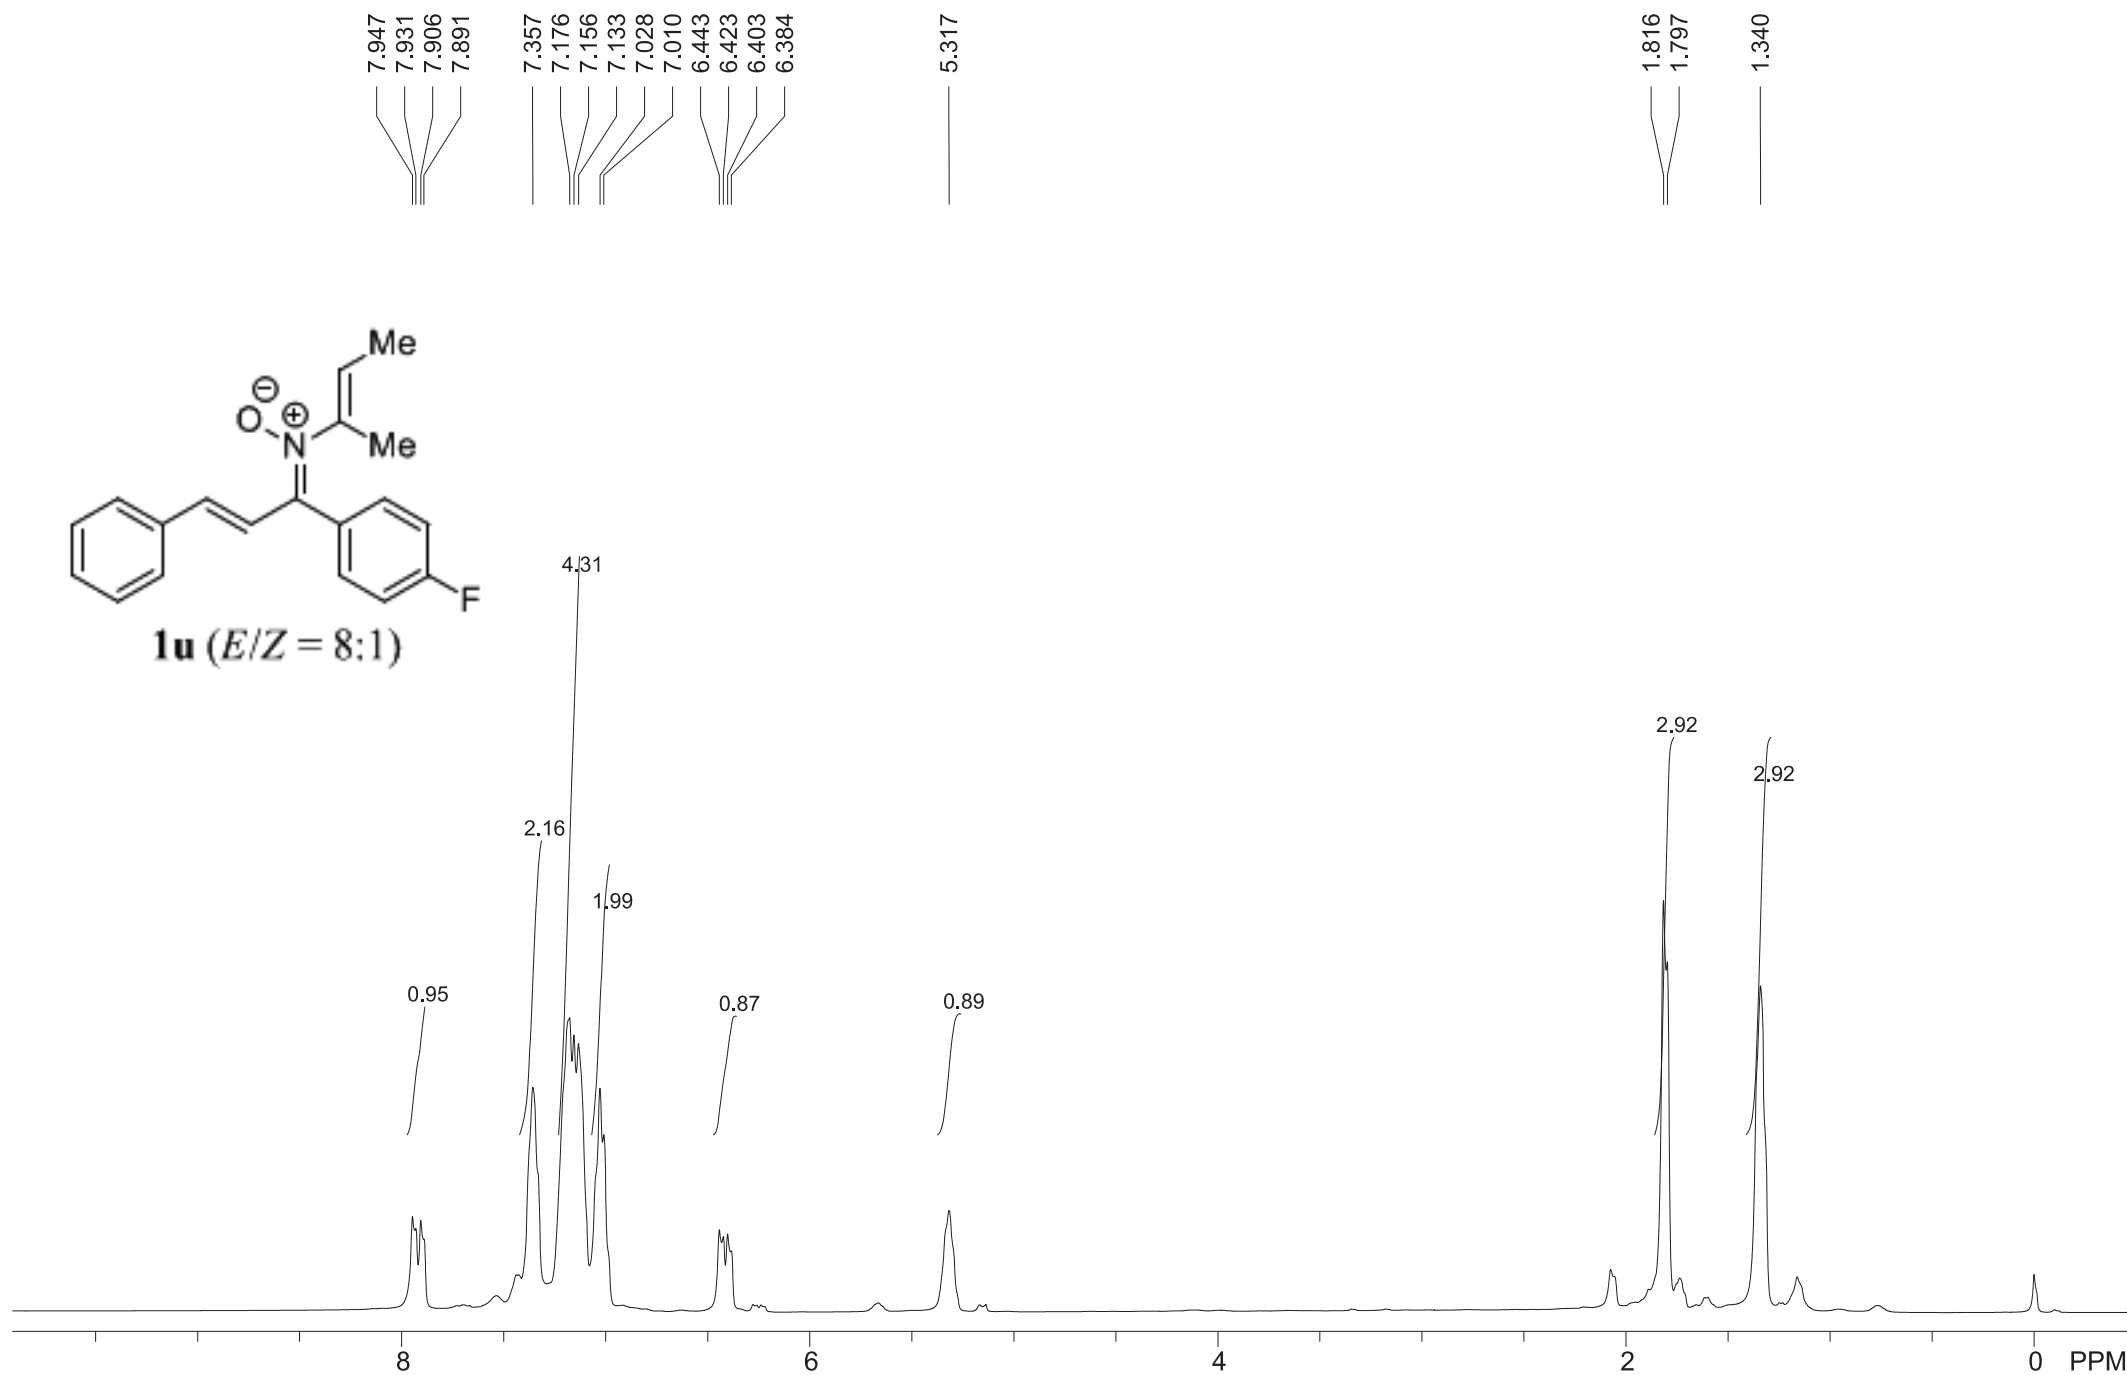

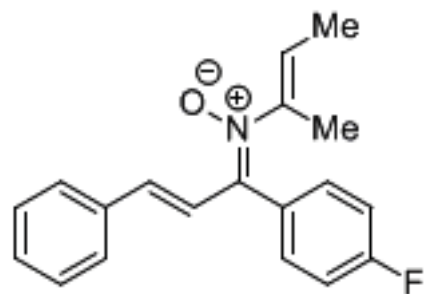

**1u** (*E/Z* = 8:1)

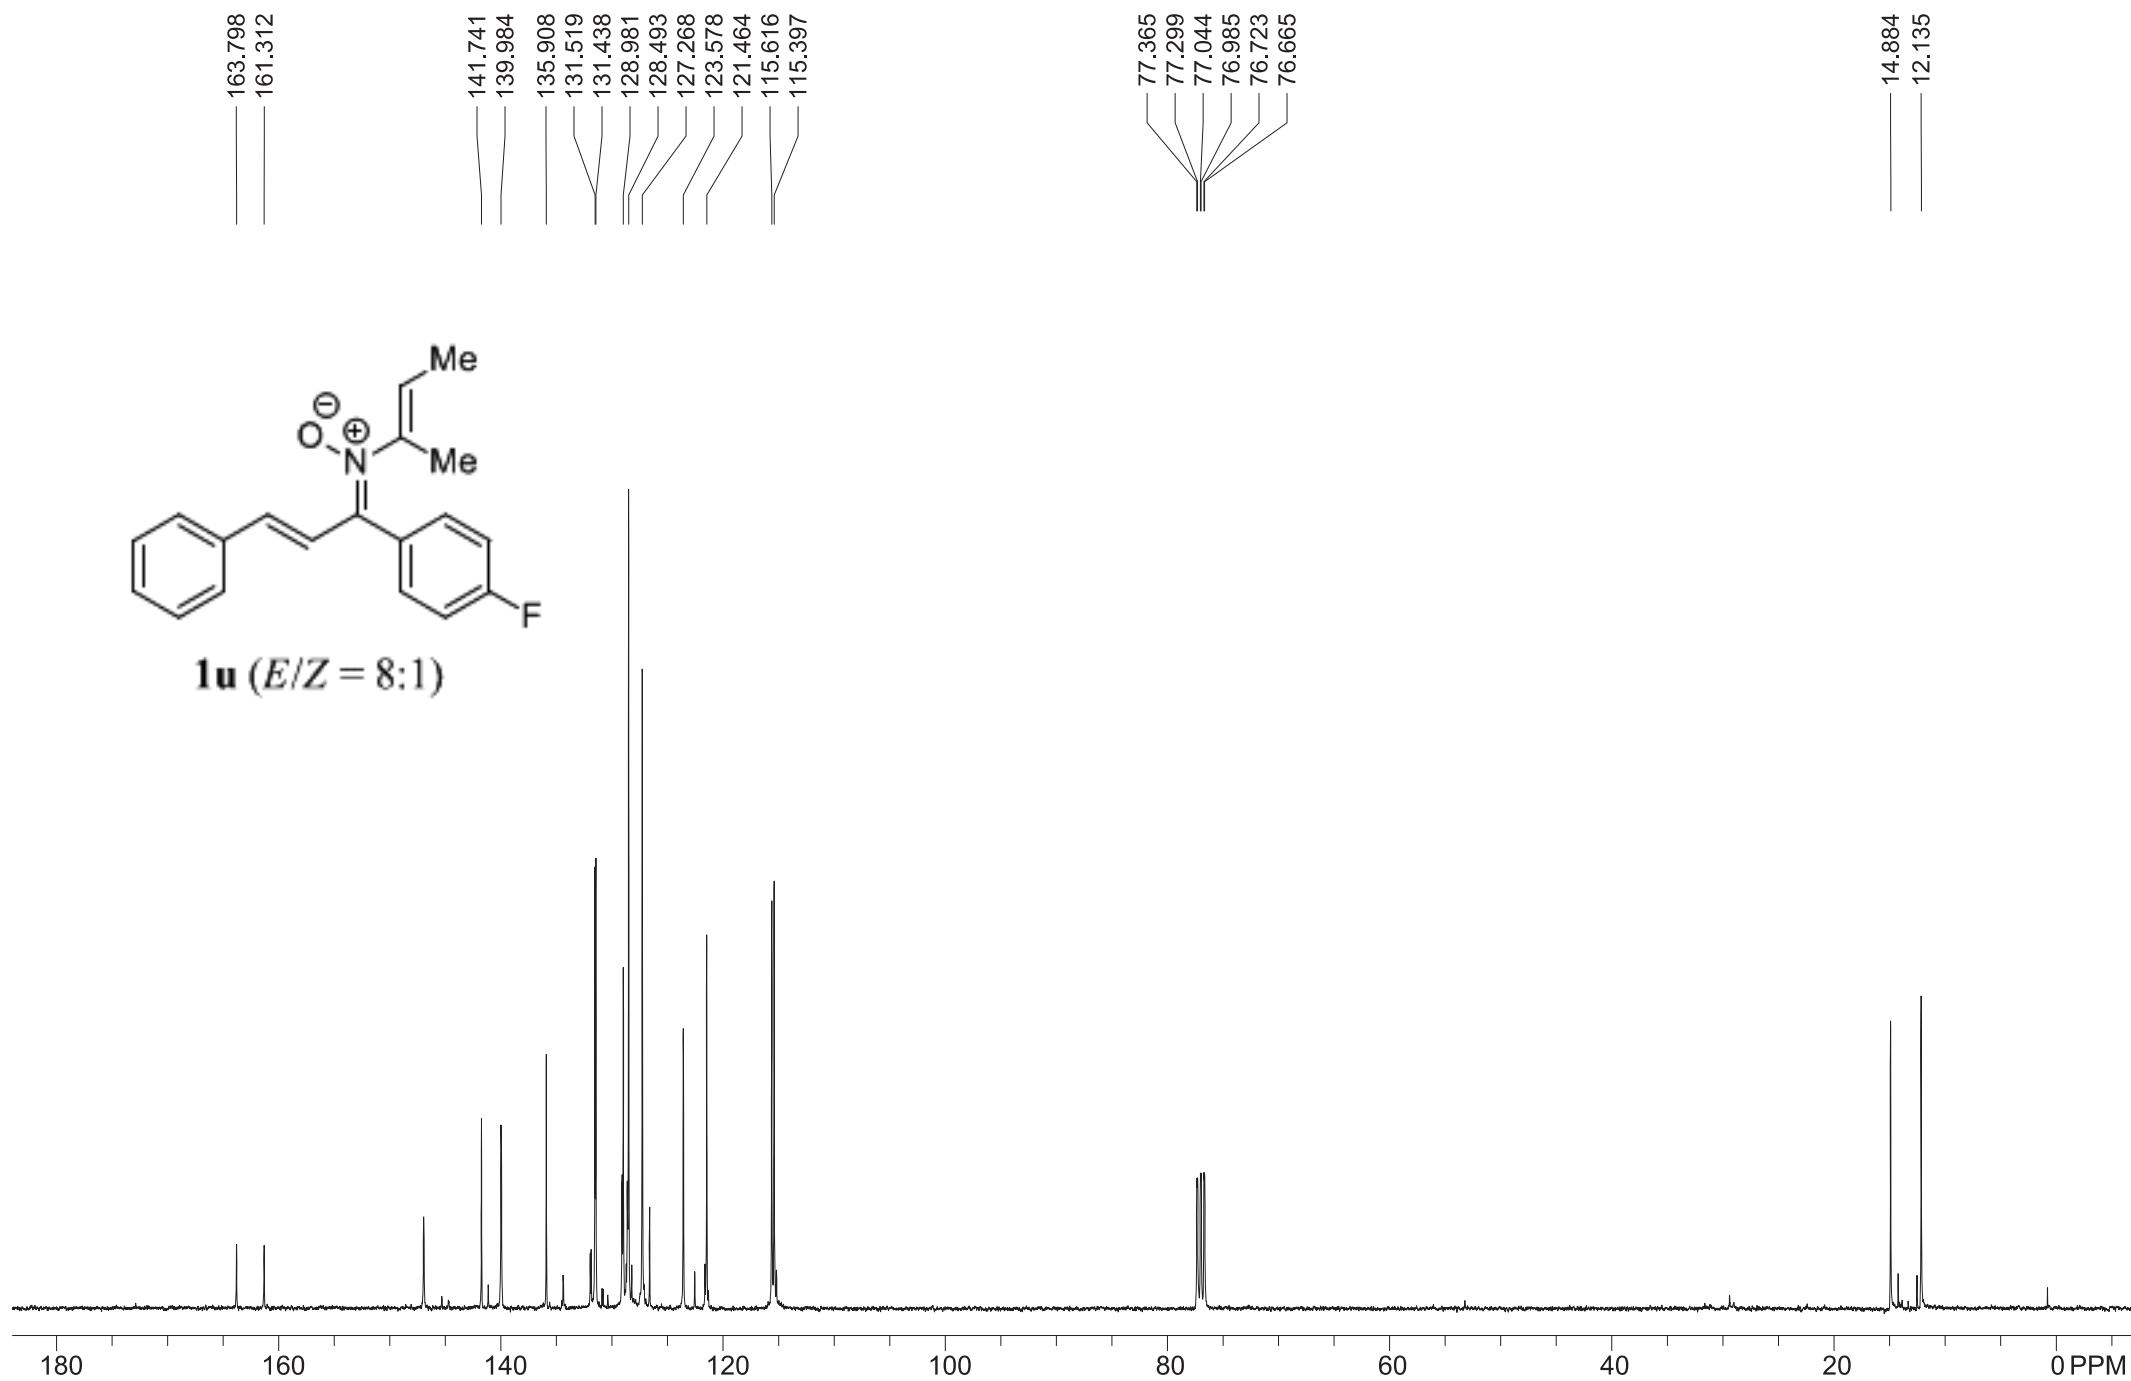

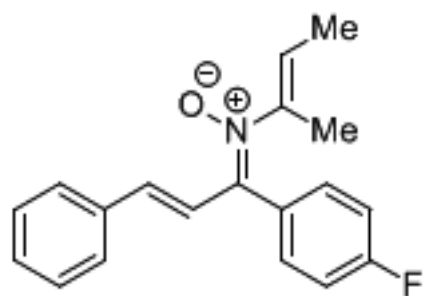

**1u** (*E/Z* = 8:1)

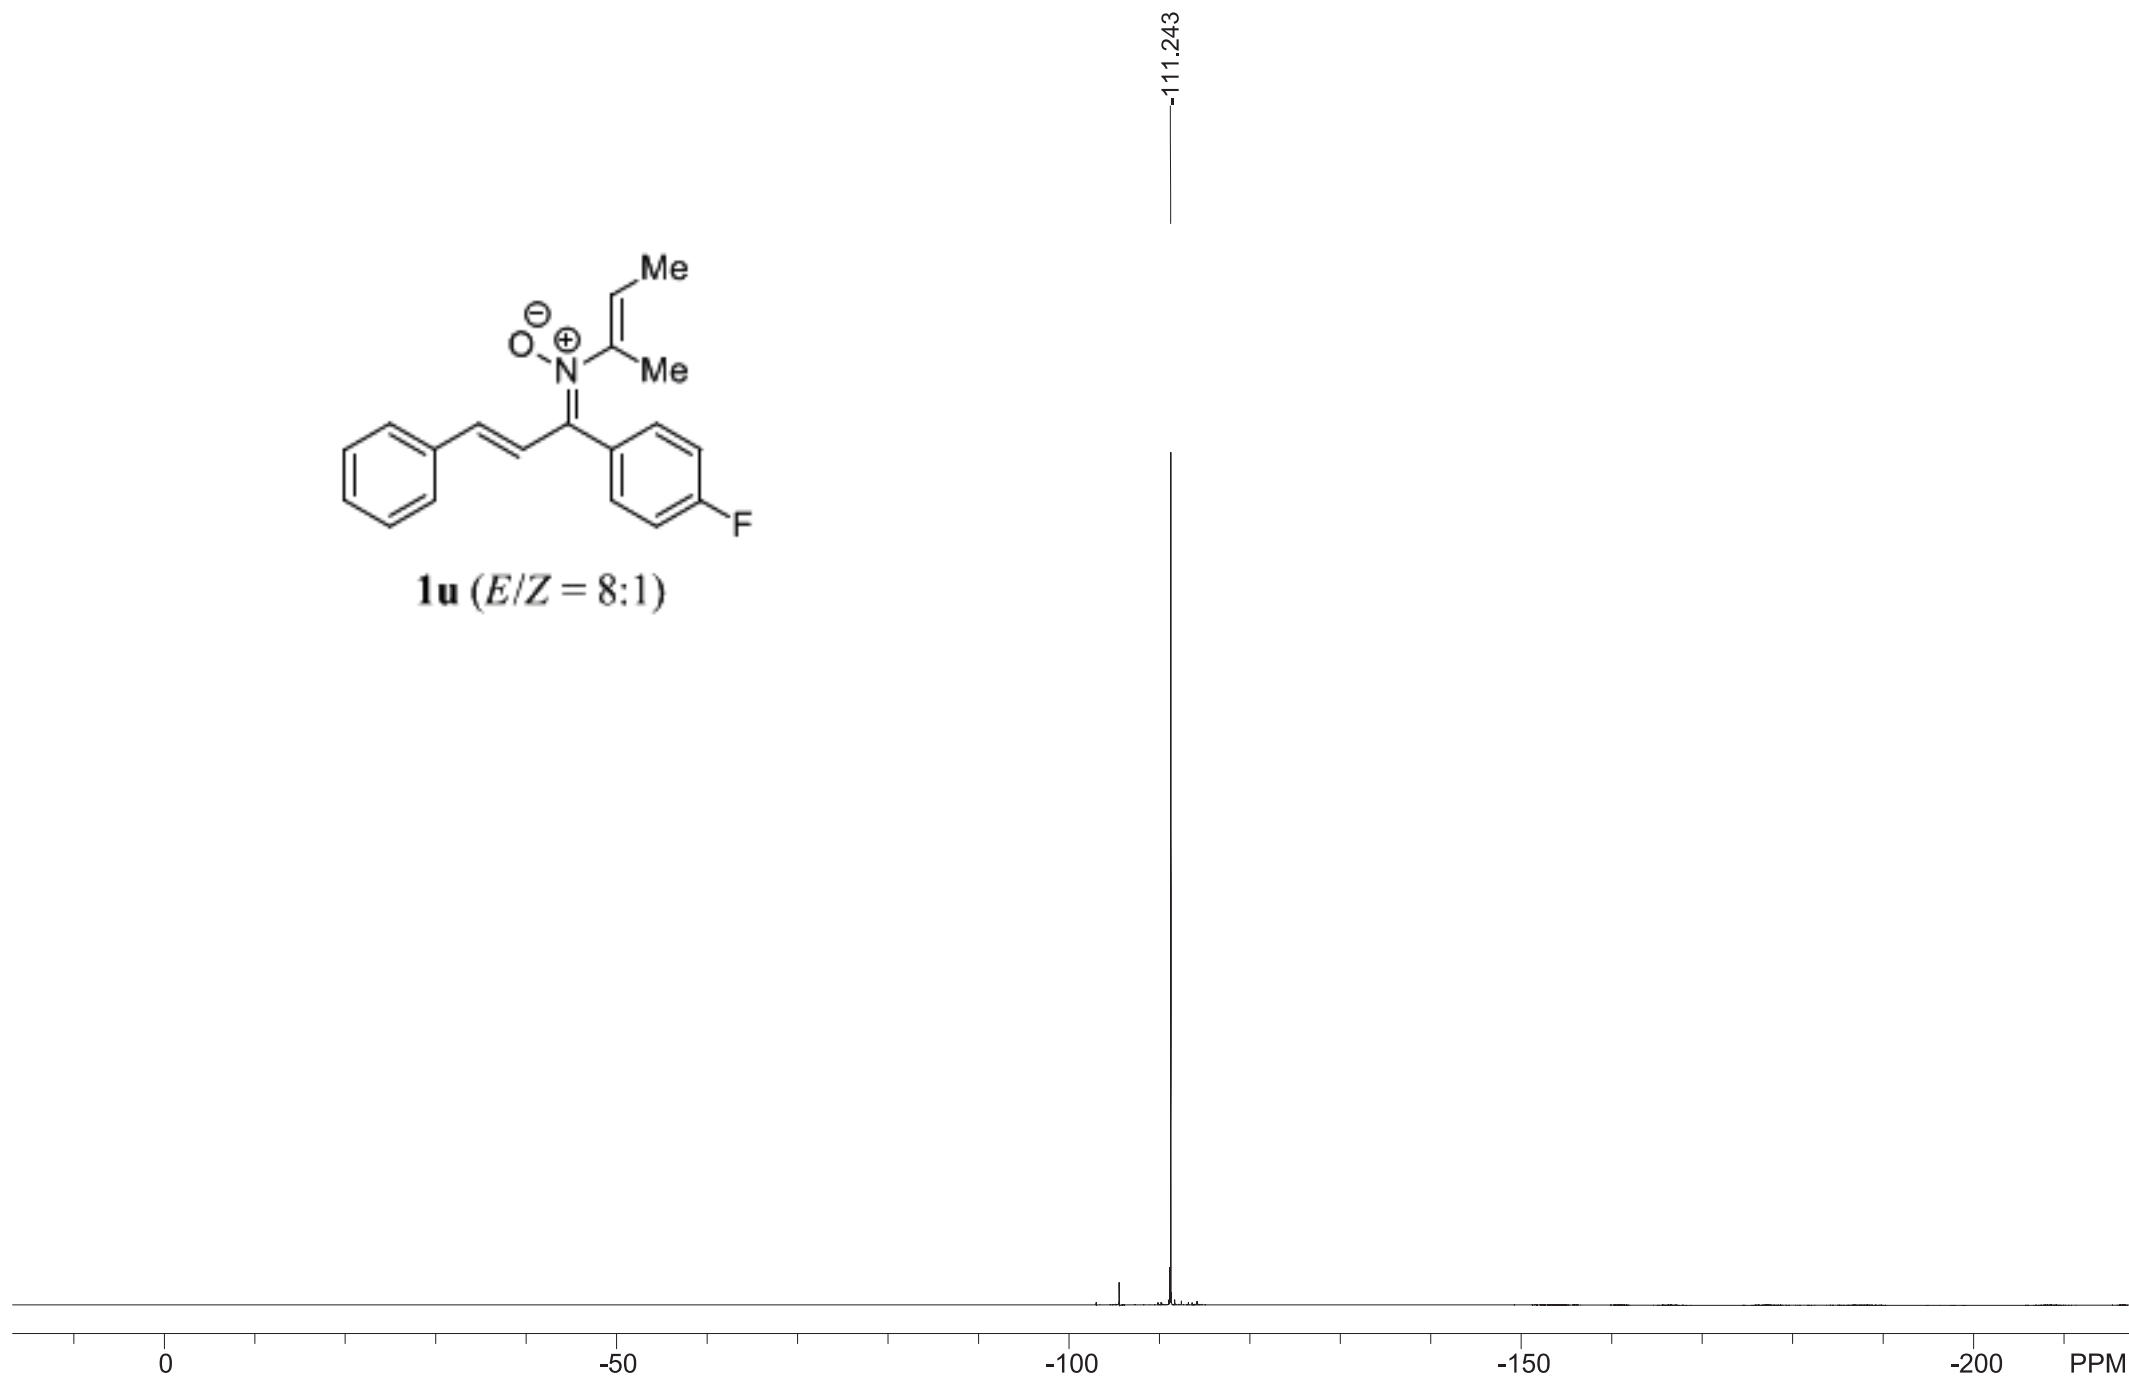

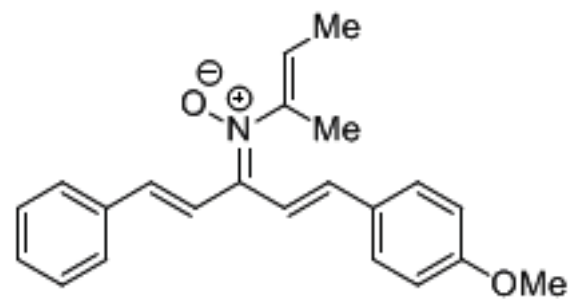

**1v** (*E/Z* = 1:1)

7.583  
7.565  
7.536  
7.514  
7.504  
7.483  
7.461  
7.451  
7.432  
7.393  
7.377  
7.374  
7.365  
7.349  
7.334  
7.325  
7.317  
7.308  
6.928  
6.909  
6.902  
6.888  
6.815  
6.775  
5.702  
5.687  
5.671  
3.824

2.107  
1.788  
1.772

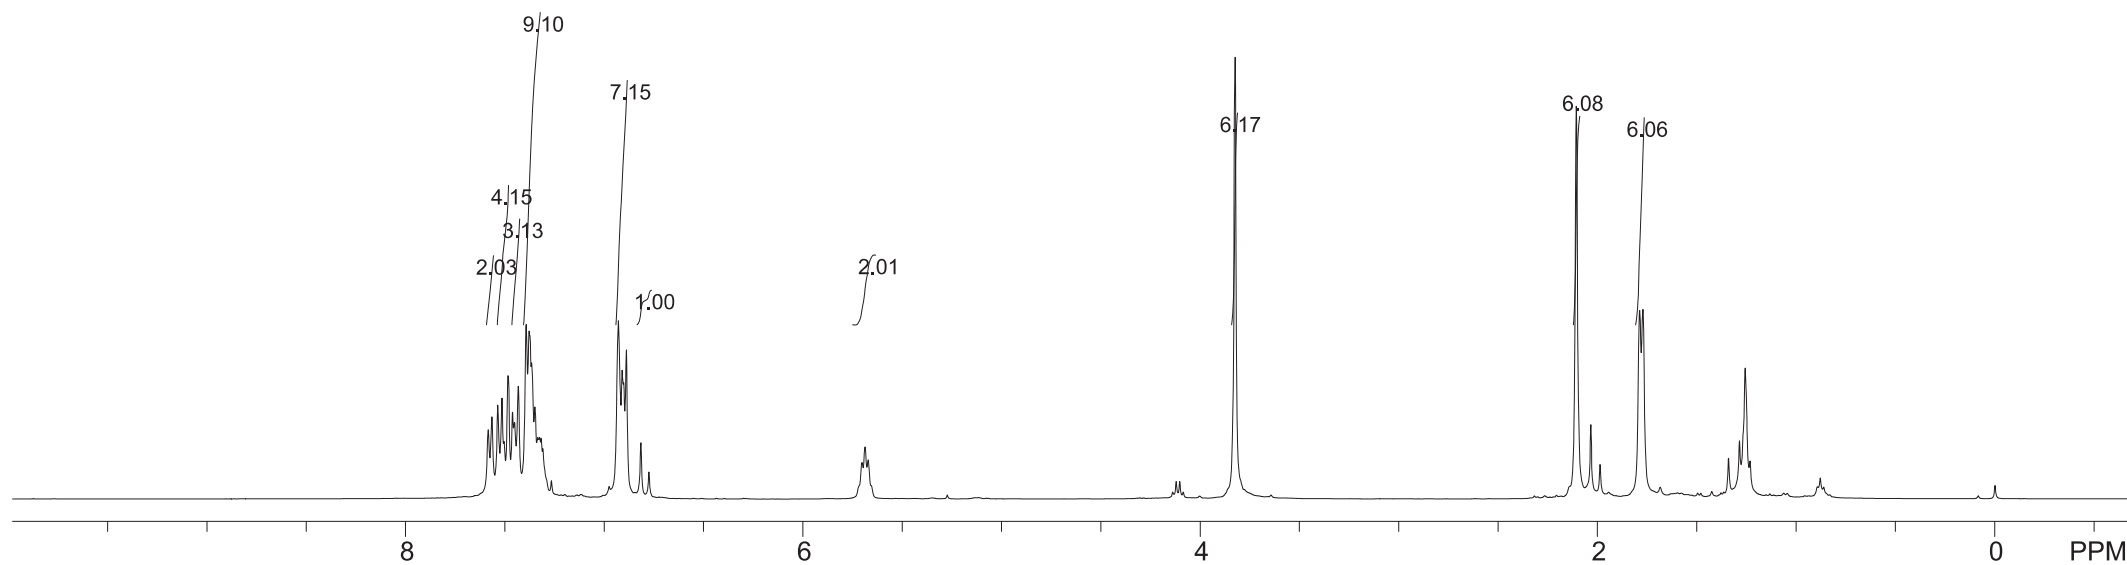

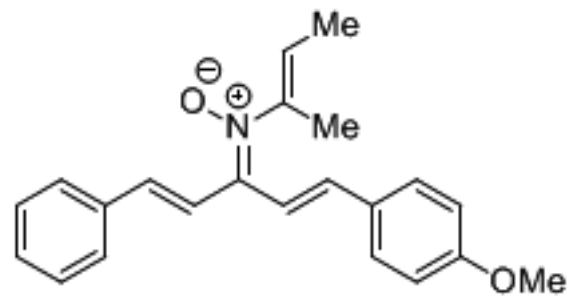

**1v** ( $E/Z = 1:1$ )

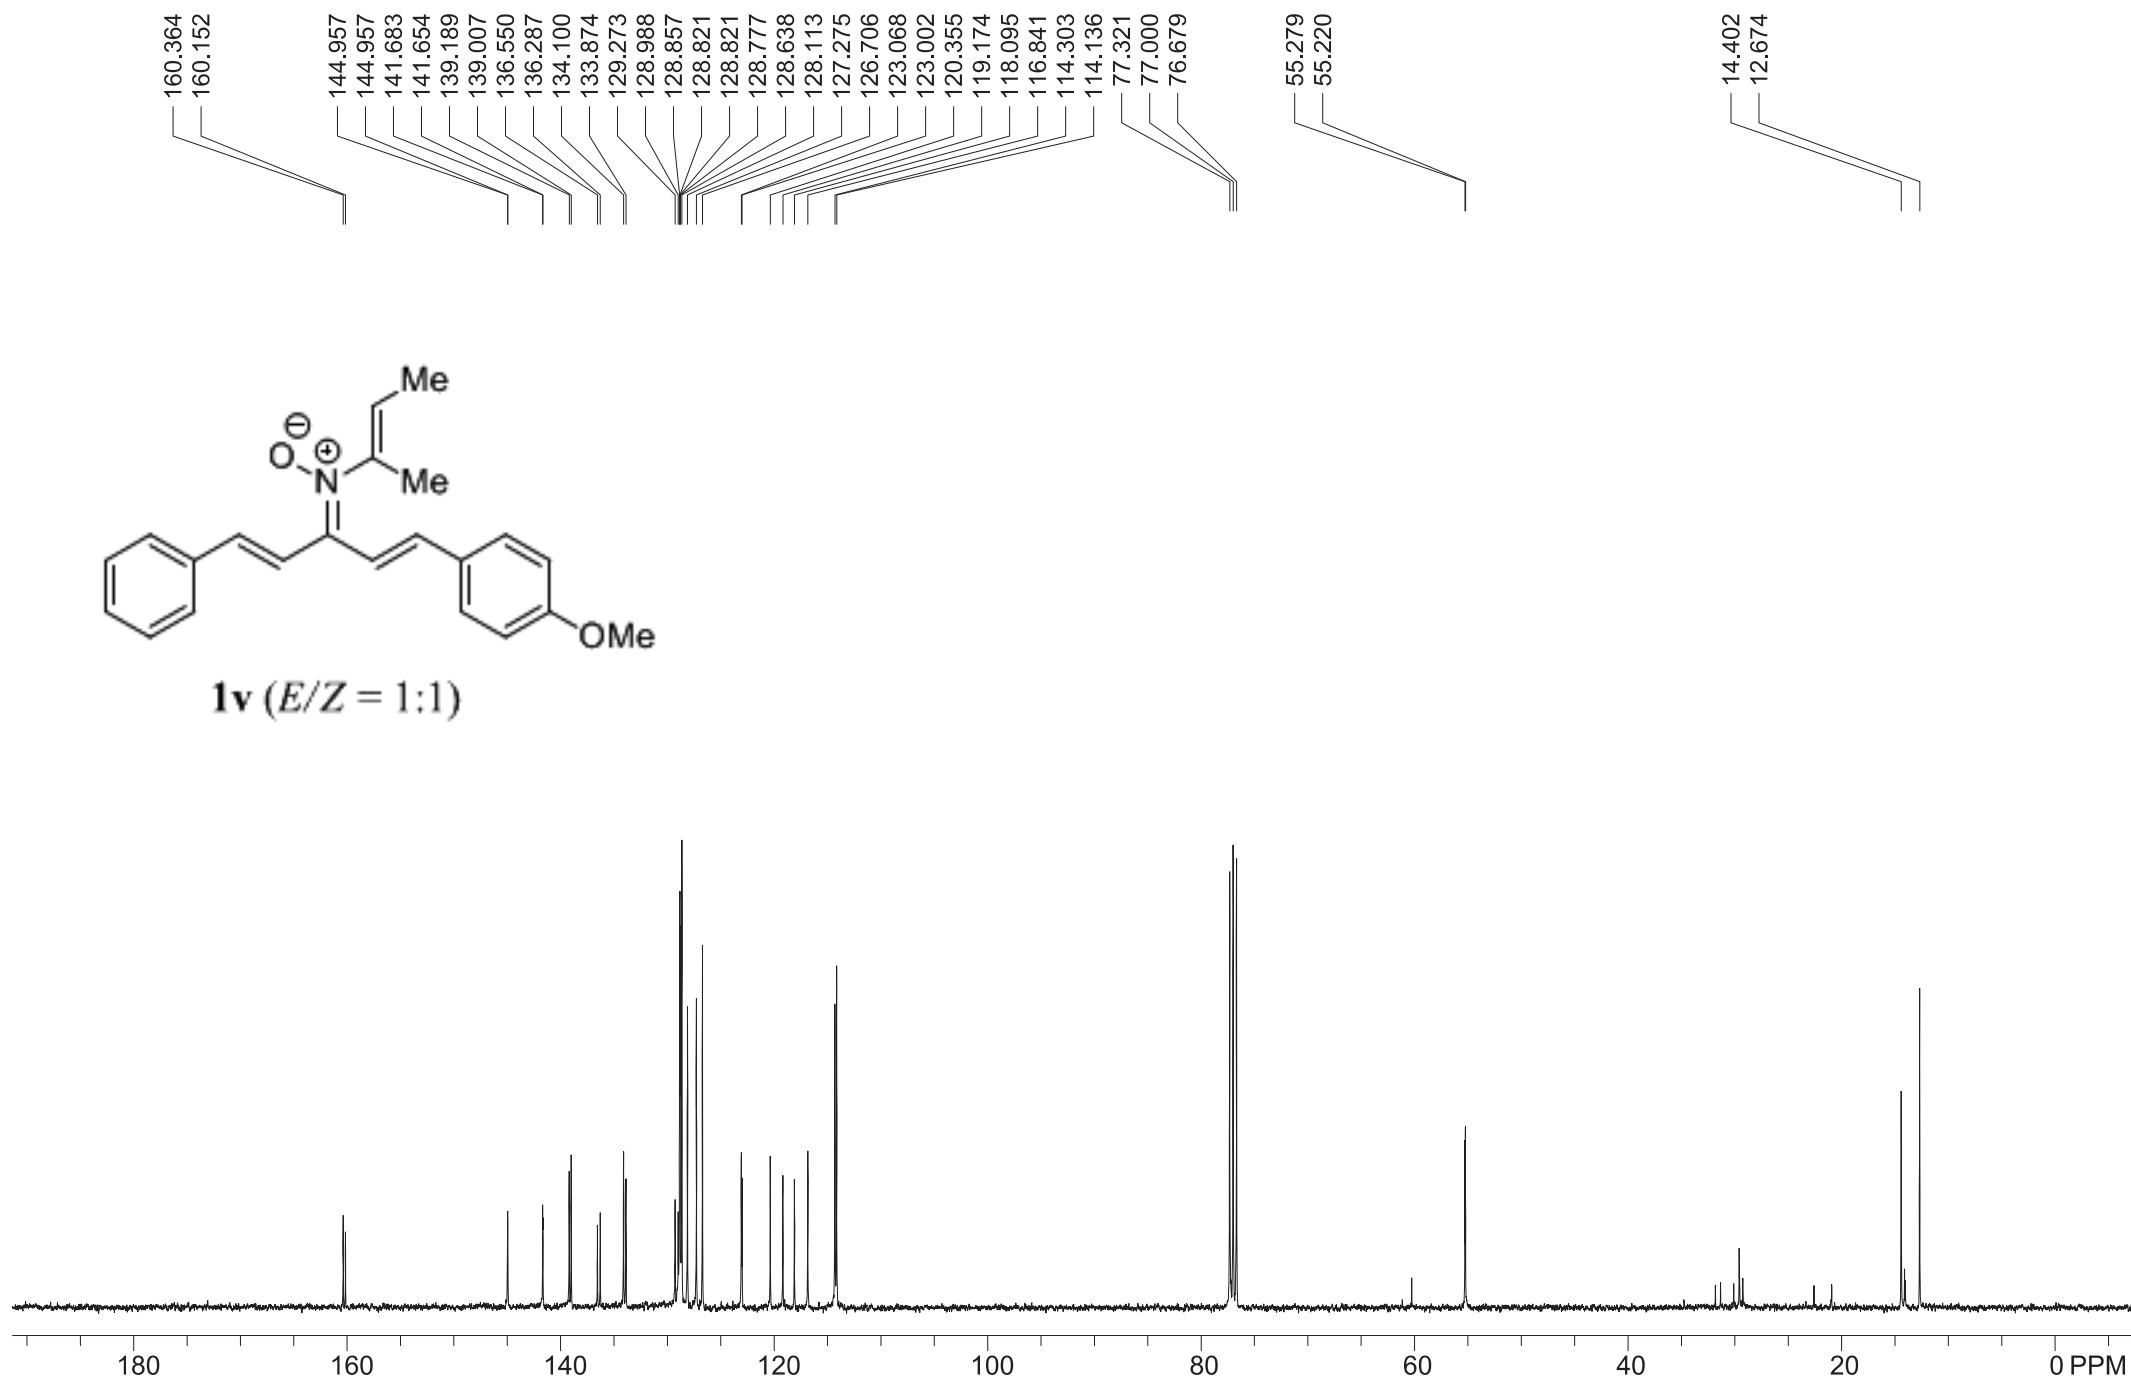



7.680  
7.660  
7.629  
7.617  
7.590  
7.573  
7.535  
7.493  
7.460  
7.442  
7.411  
7.393  
7.381  
7.363  
7.355  
7.337  
7.263  
7.066  
7.026  
6.985  
6.948  
5.723  
5.708  
5.692

2.123  
2.123  
1.810  
1.793

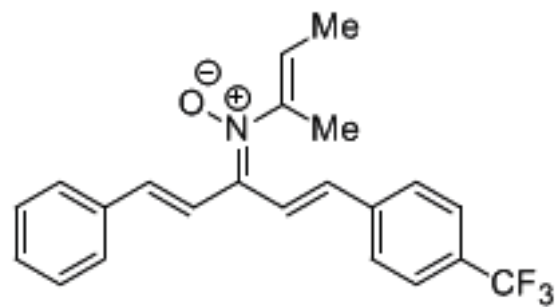

**1w** (*E/Z* = 1:1)

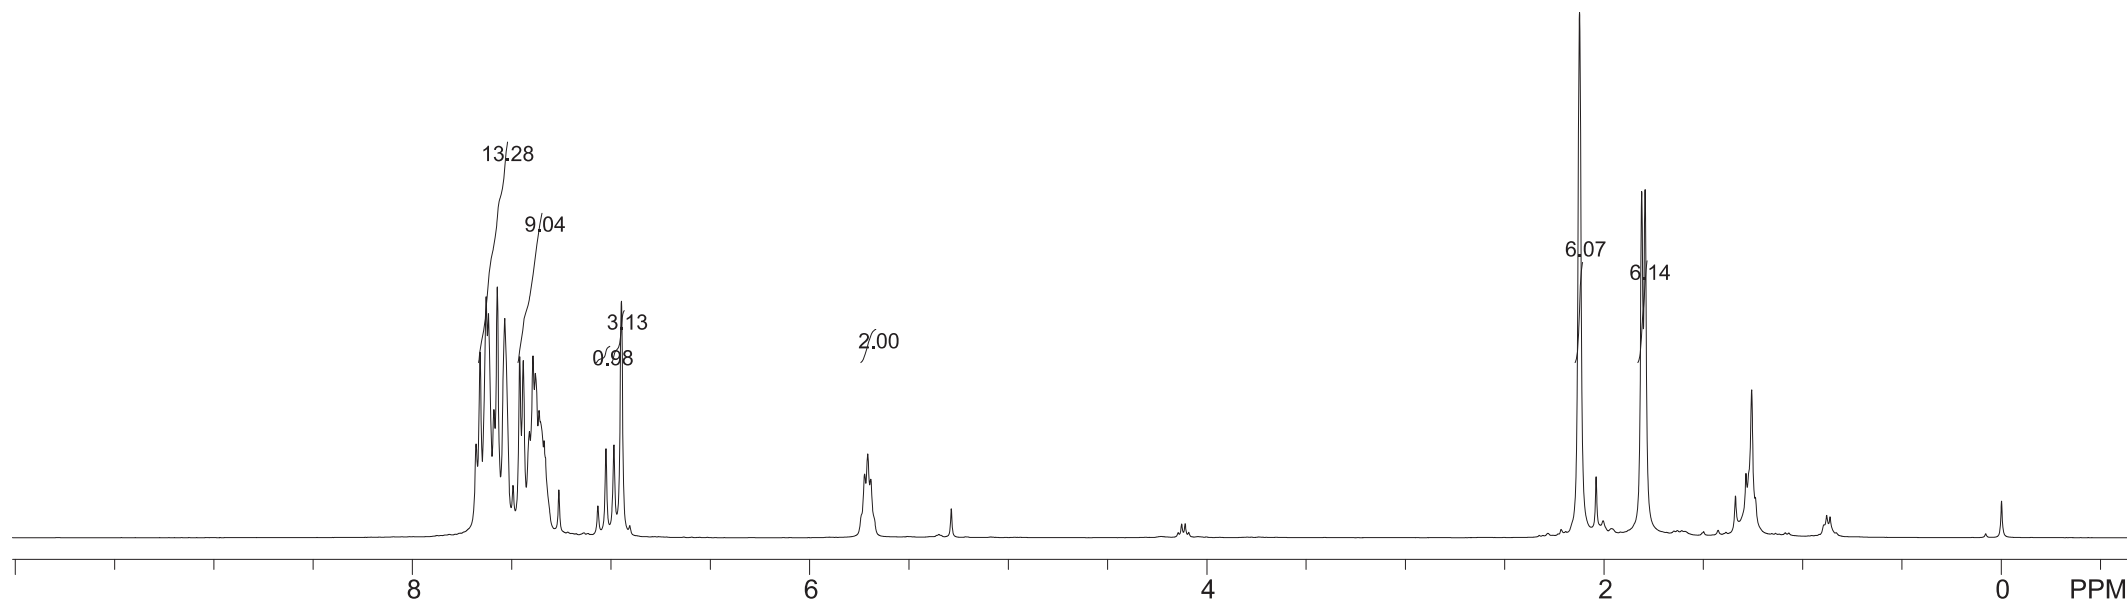

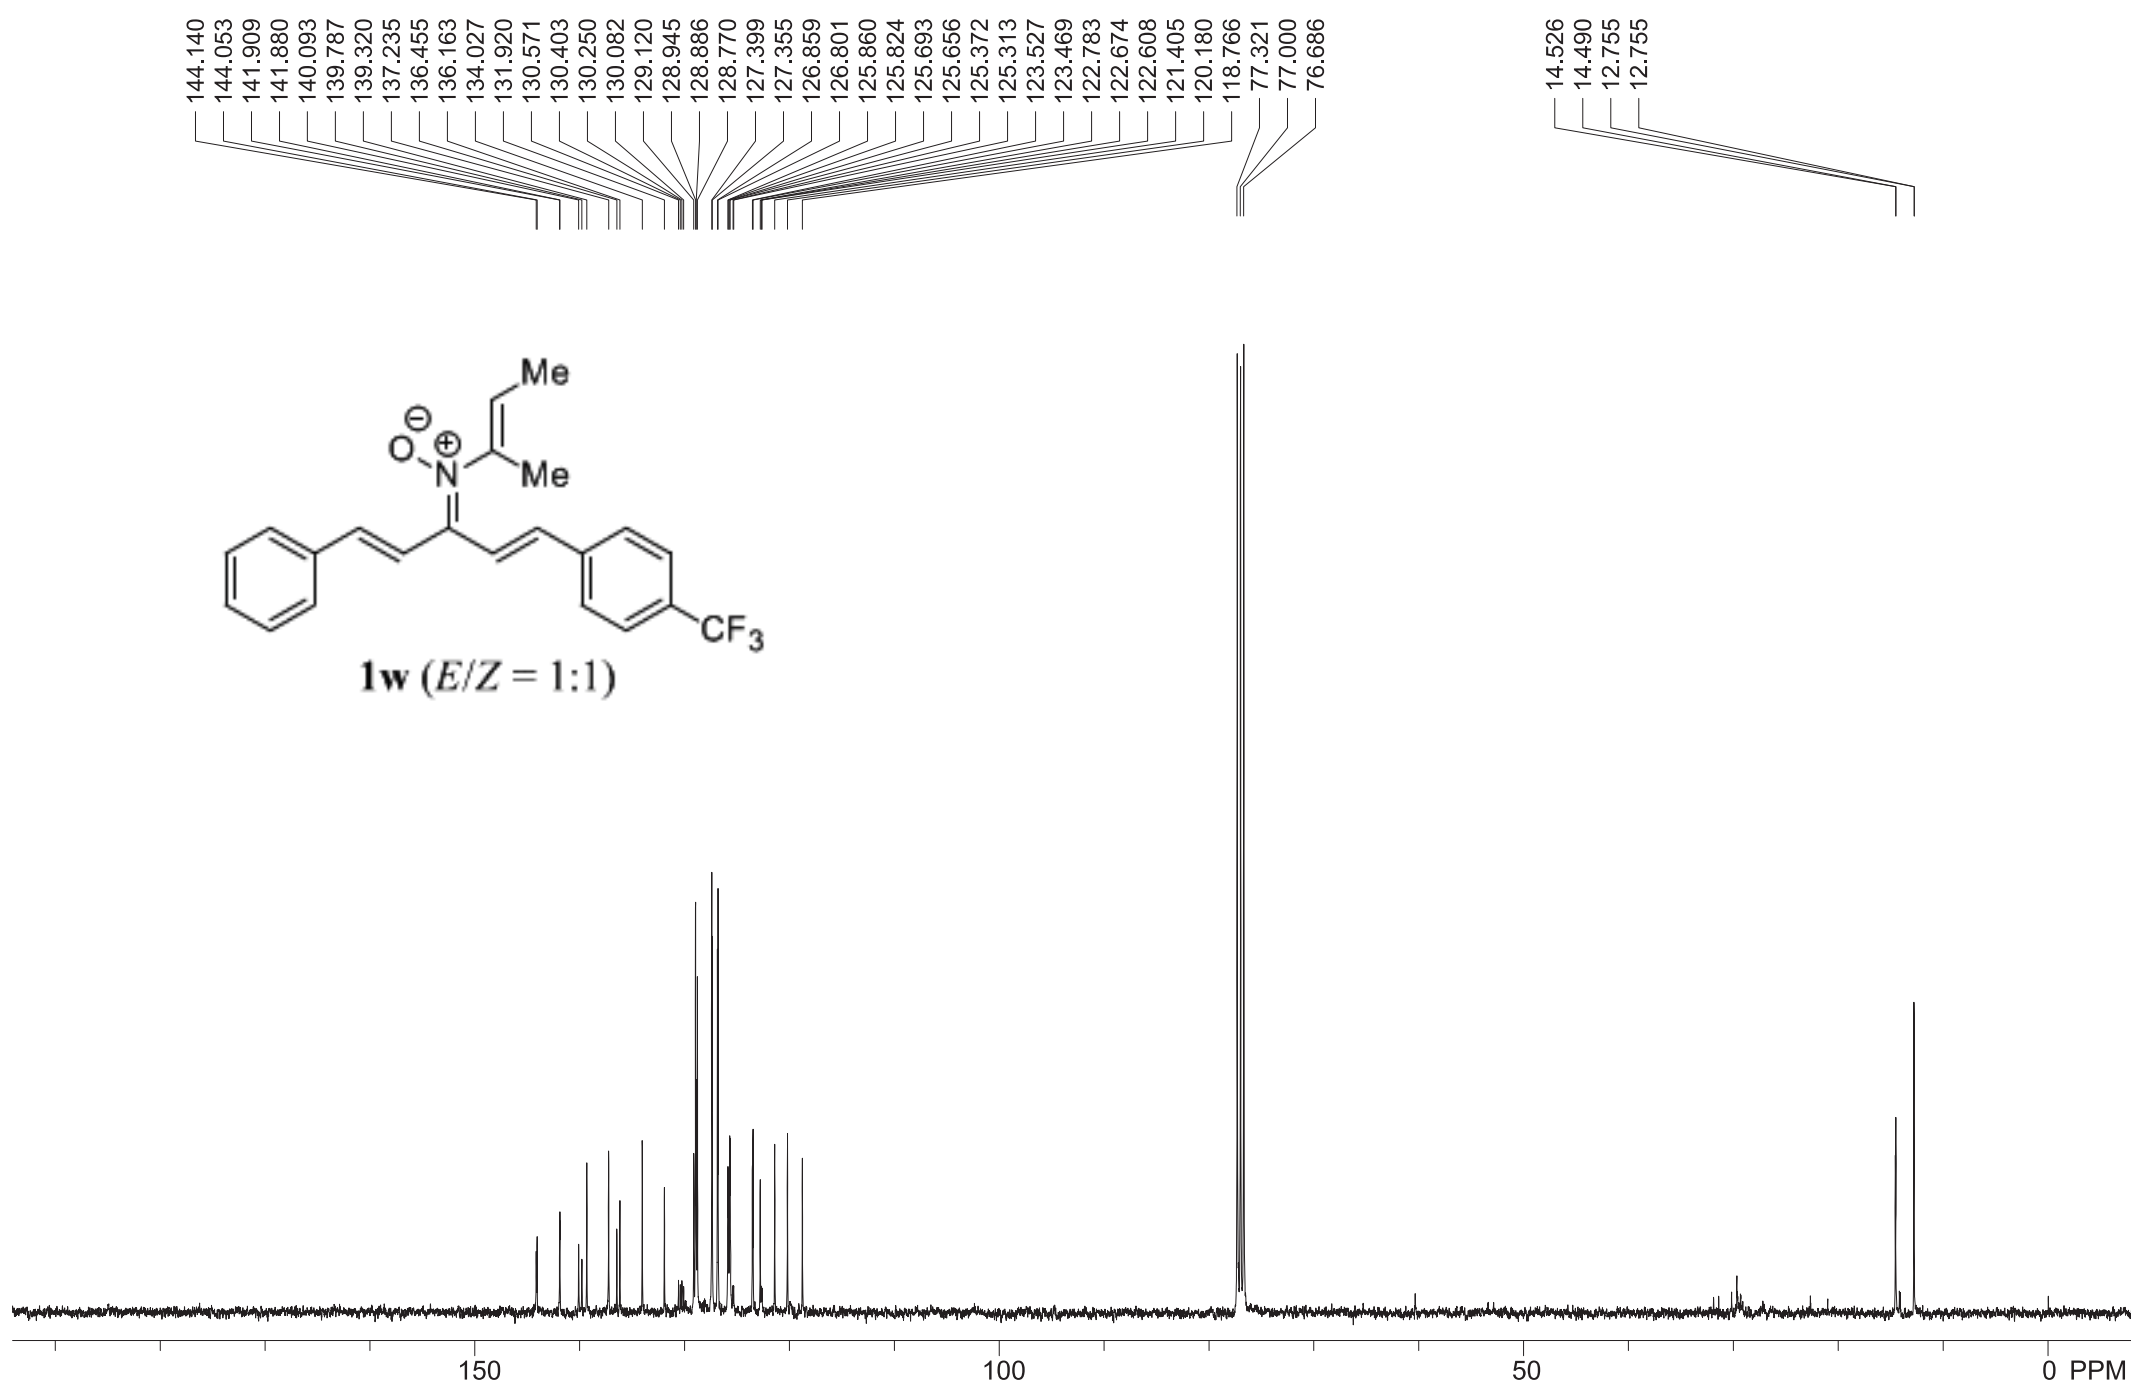

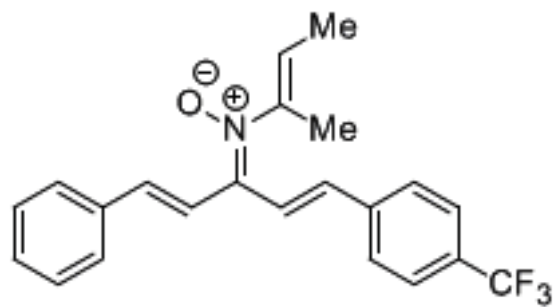

**1w** ( $E/Z = 1:1$ )

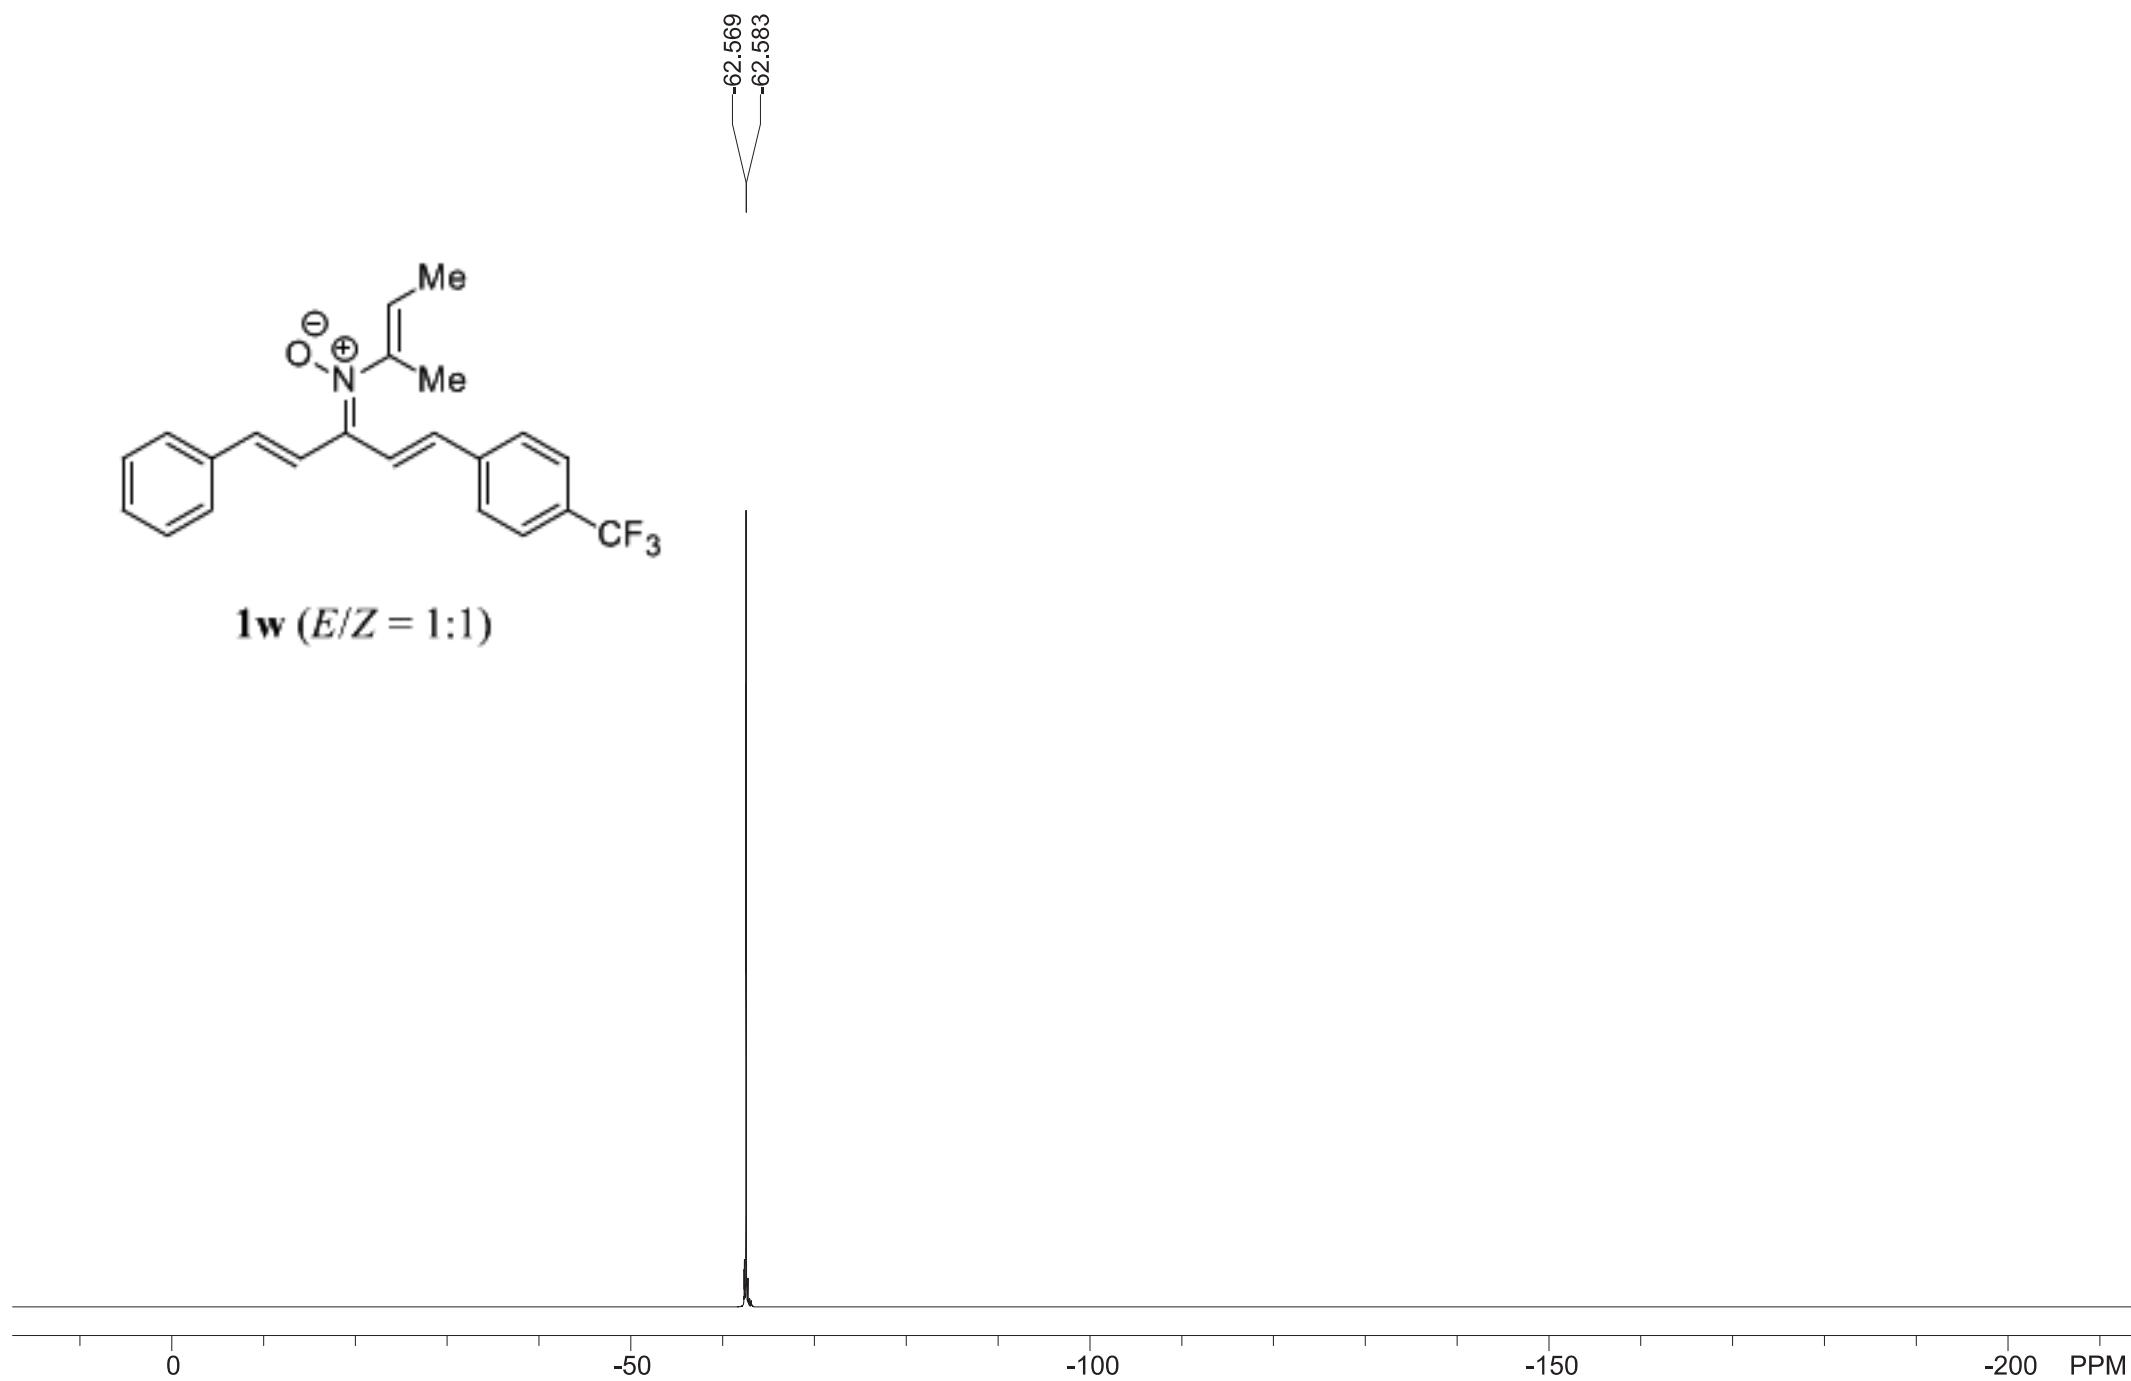

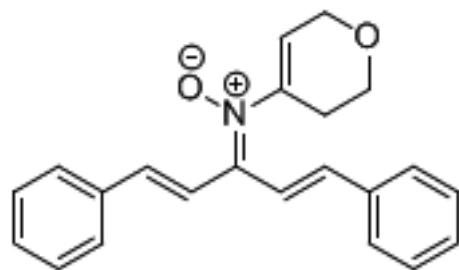

**1ah**

7.498  
7.481  
7.450  
7.422  
7.378  
7.359  
7.312  
7.296  
7.281  
7.263  
7.240  
6.912  
6.902  
5.851

4.217

3.869

2.571

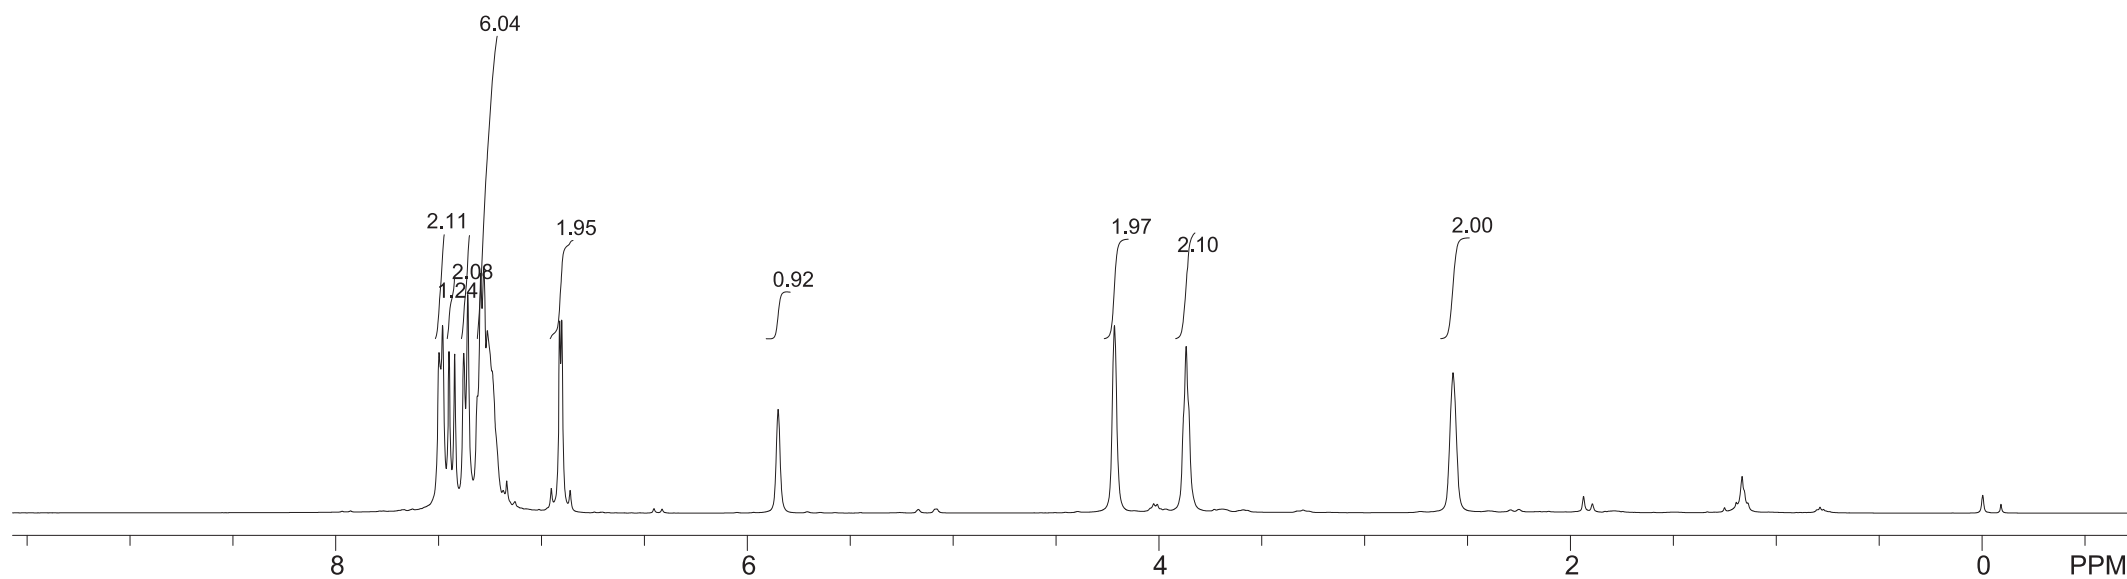

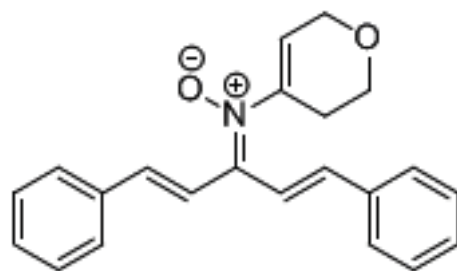

**1ah**

145.679  
141.049  
139.780  
136.309  
135.930  
134.647  
129.069  
128.872  
128.668  
128.237  
127.326  
126.764  
123.556  
119.823  
118.897

77.314  
77.000  
76.679

64.130  
63.948

26.273

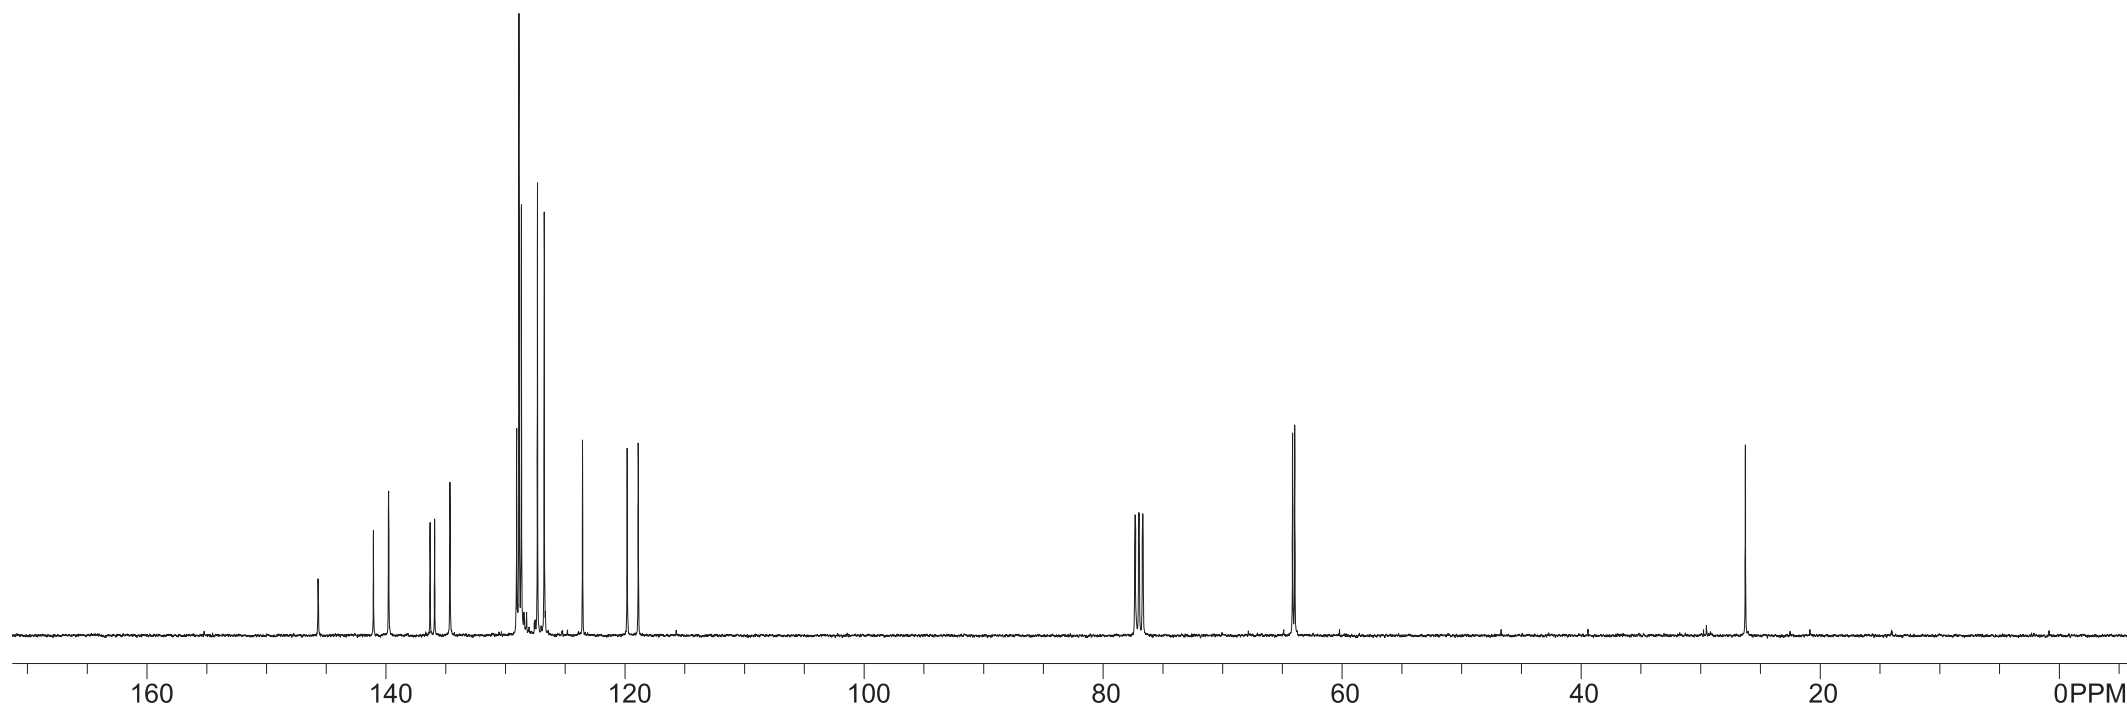

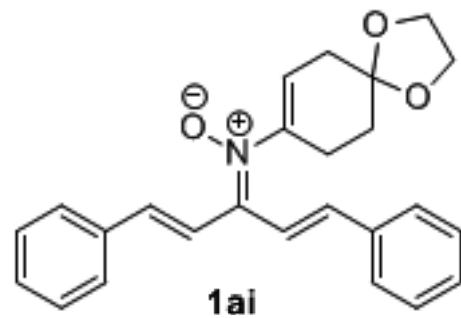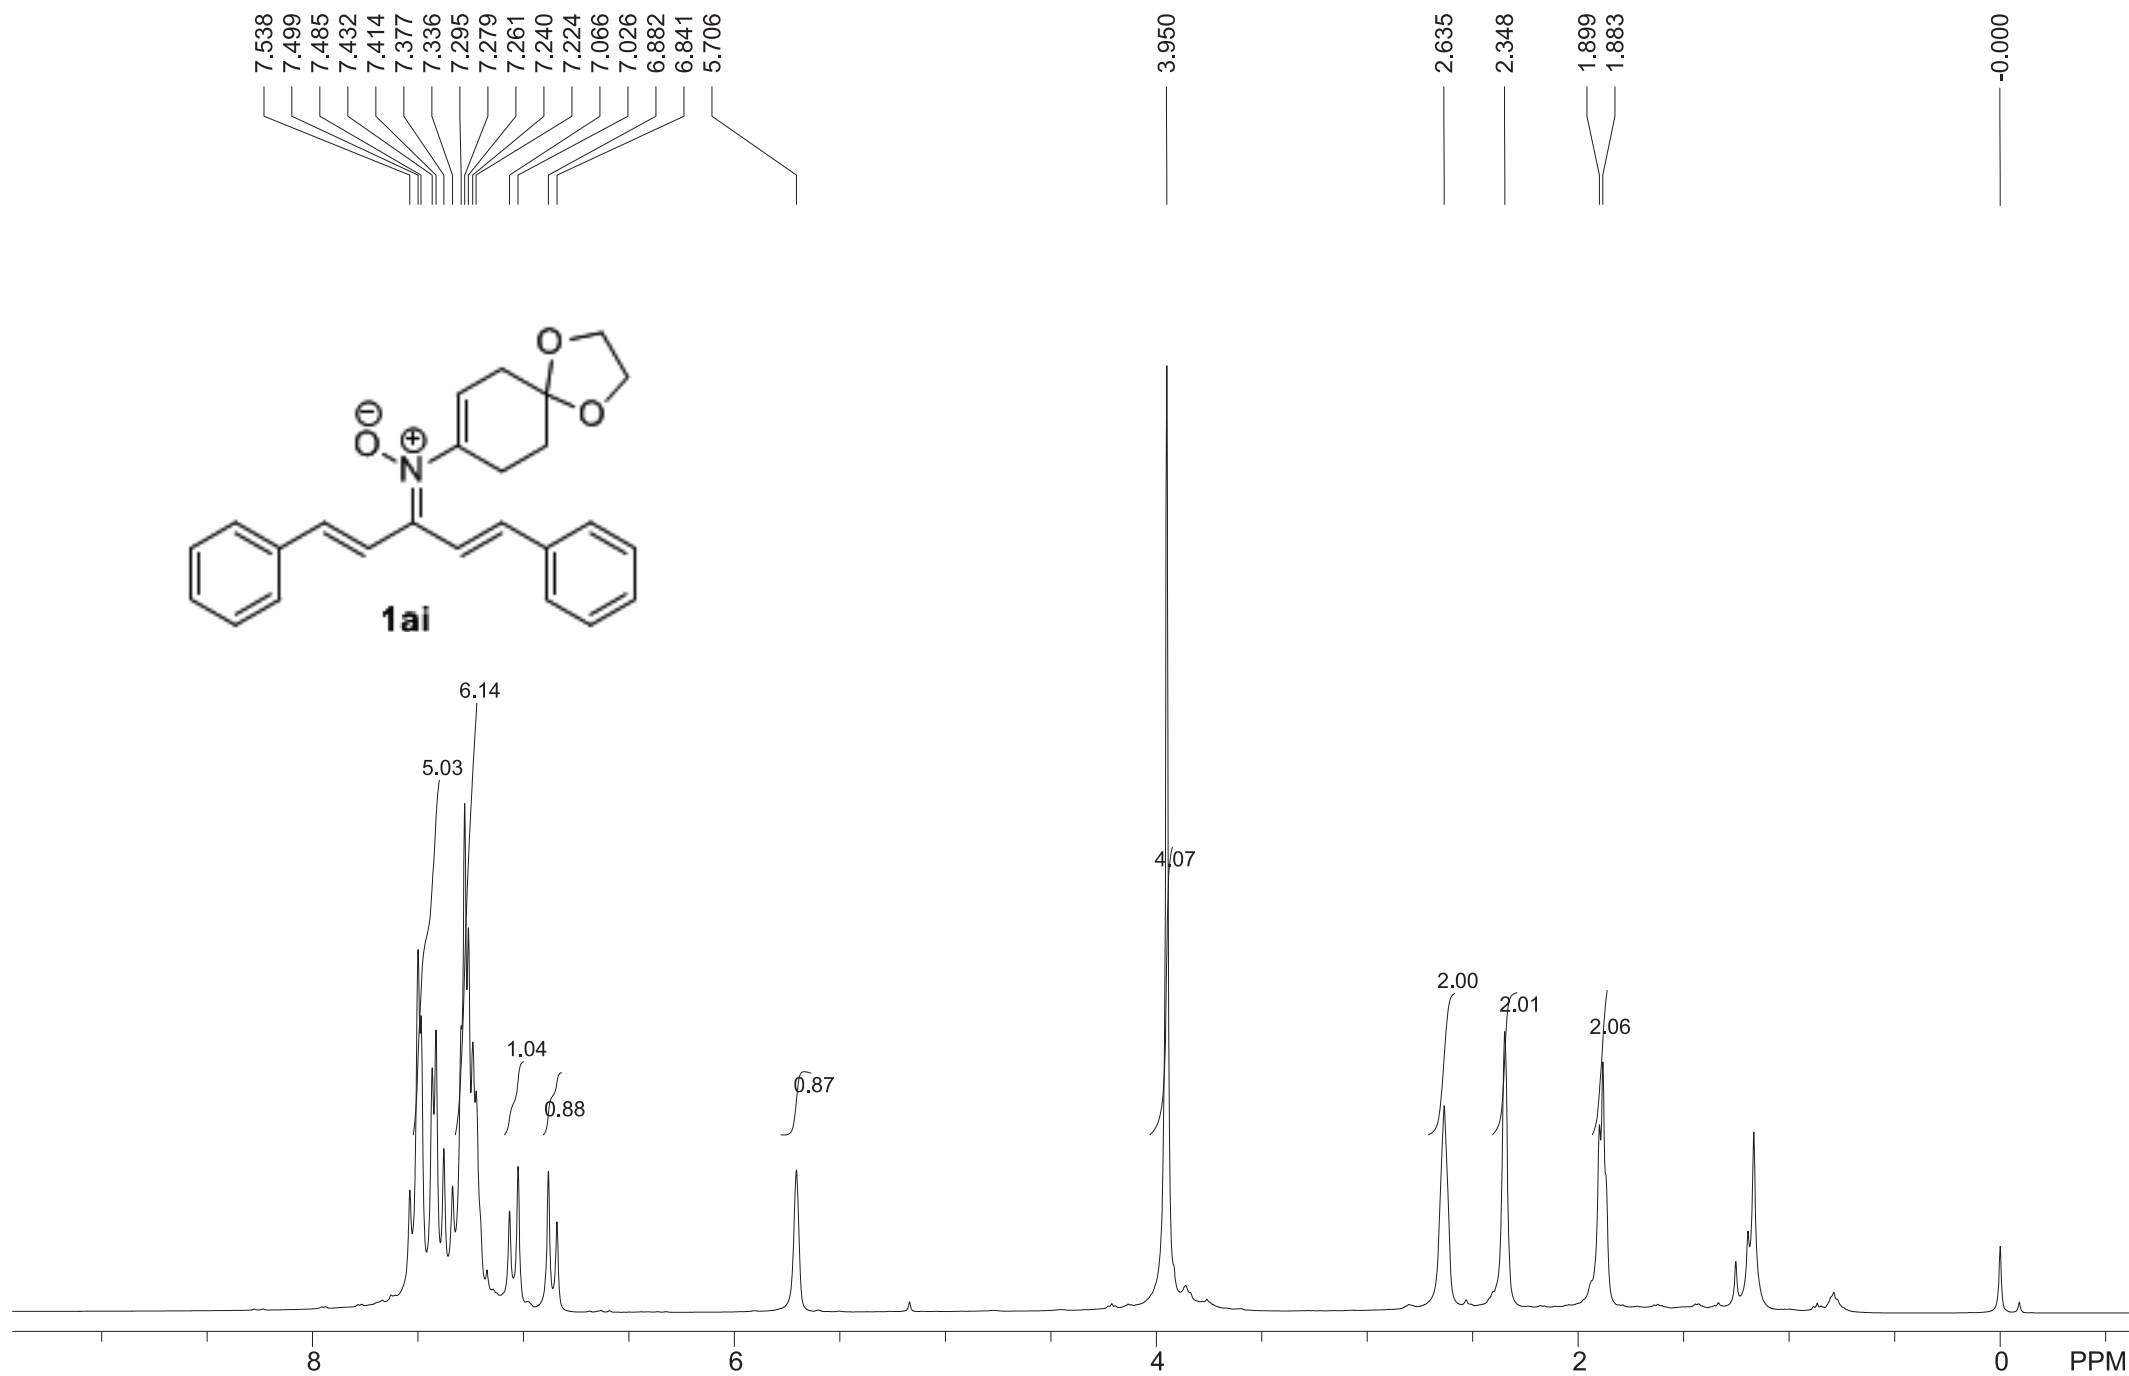

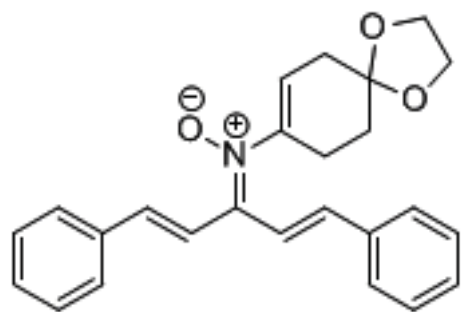

**1ai**

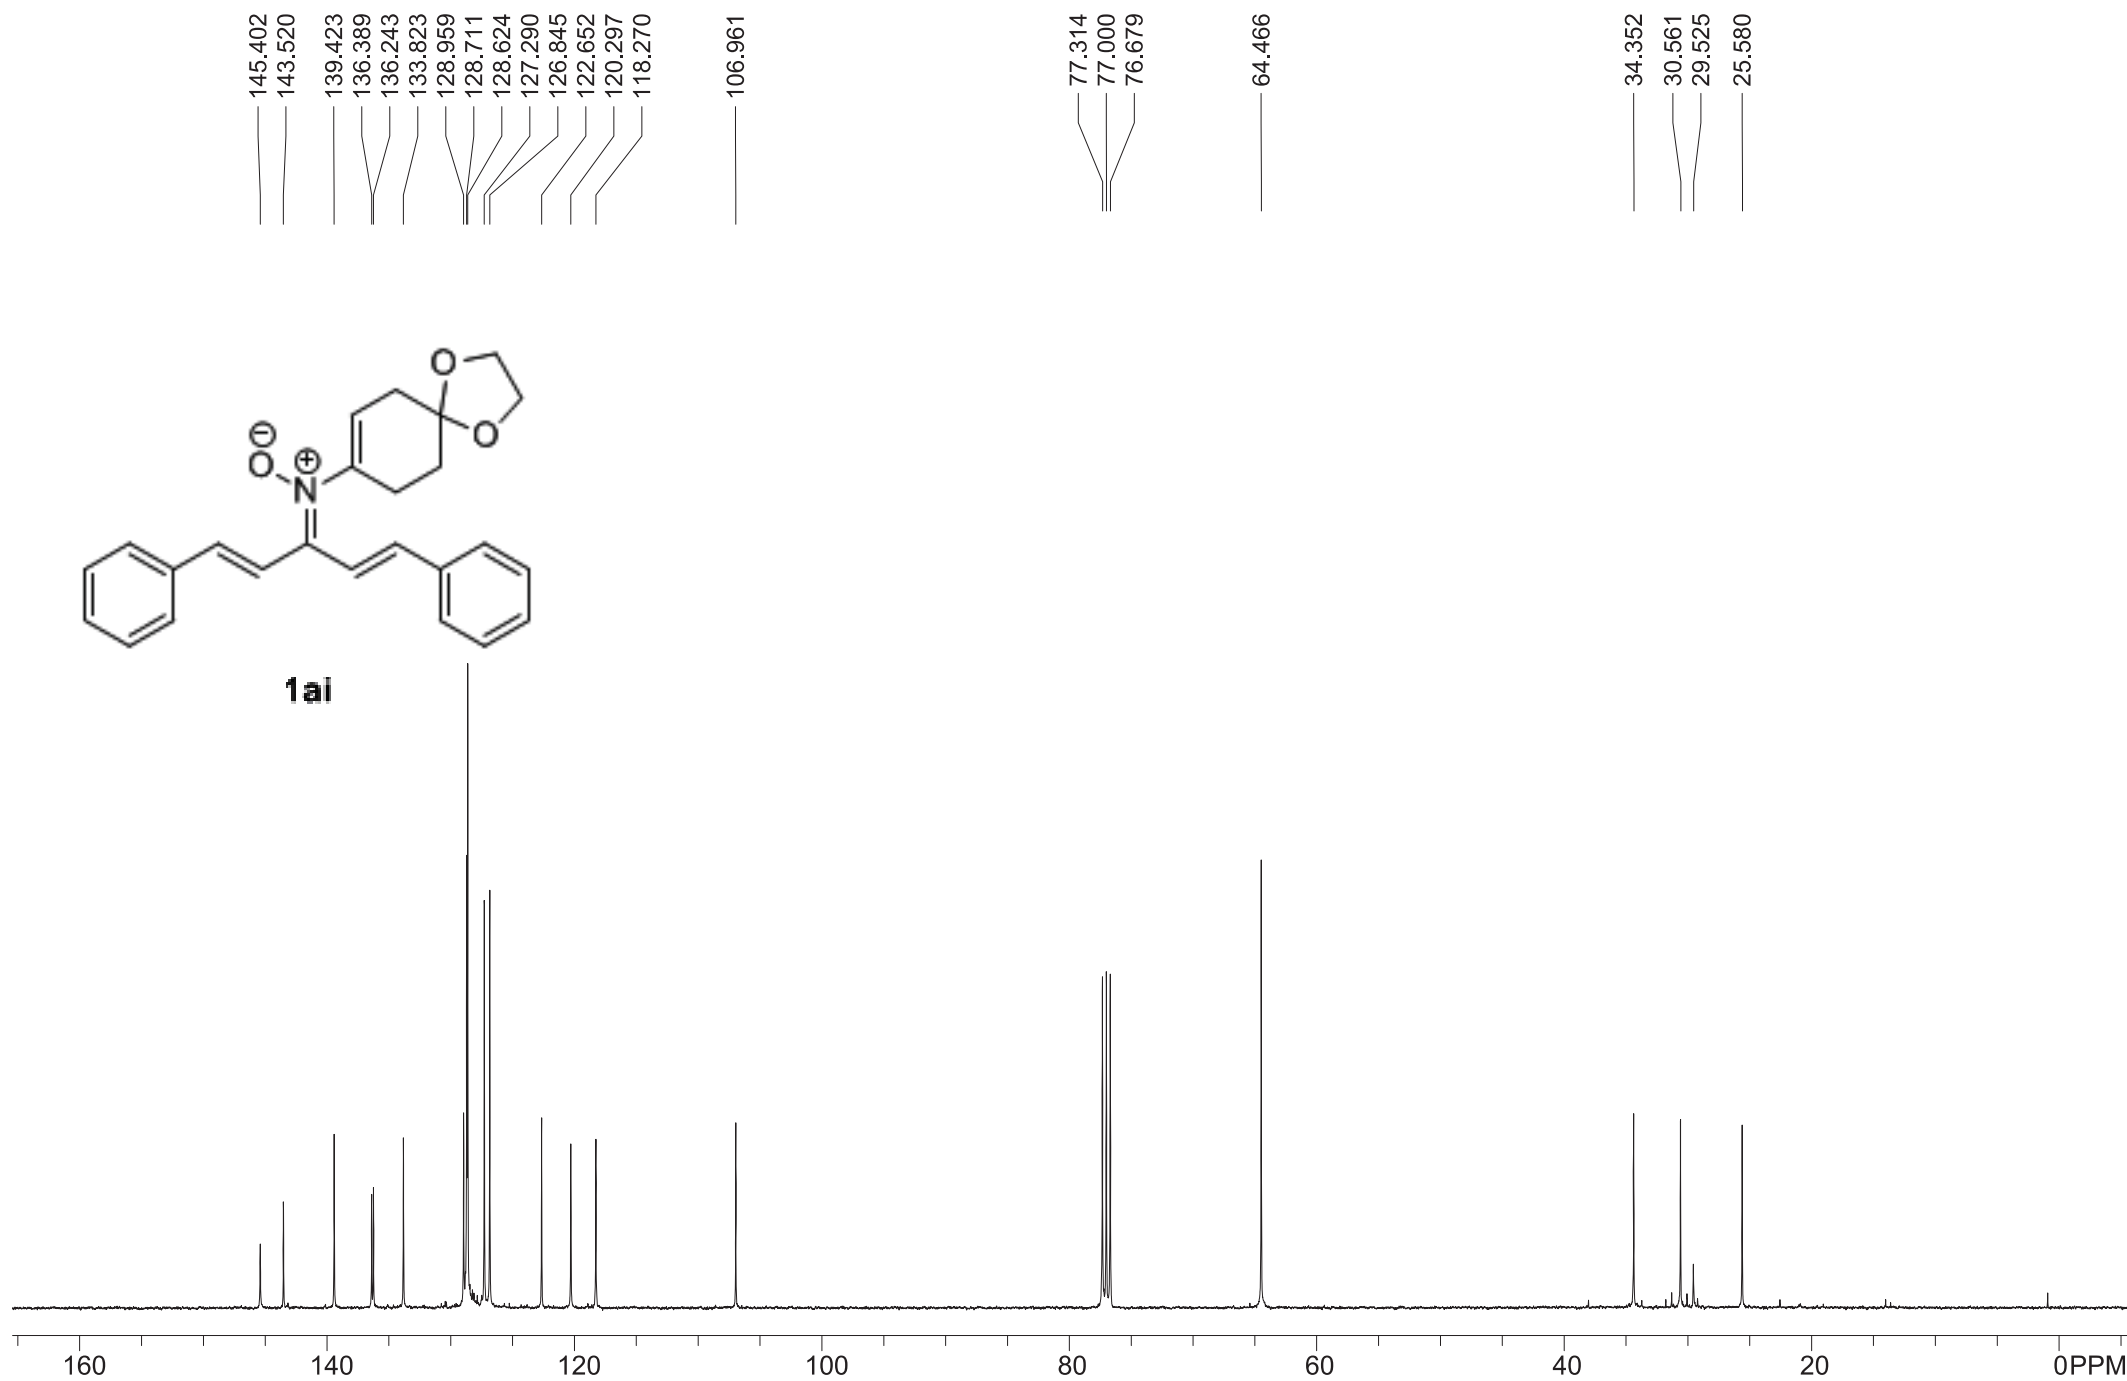

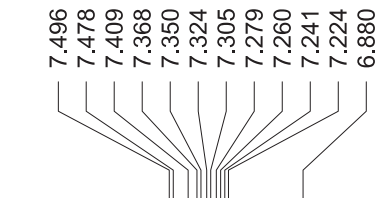

5.838

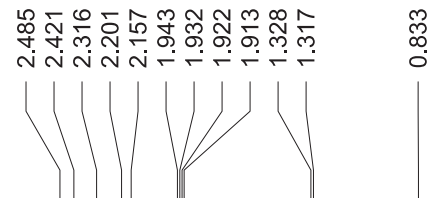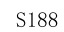



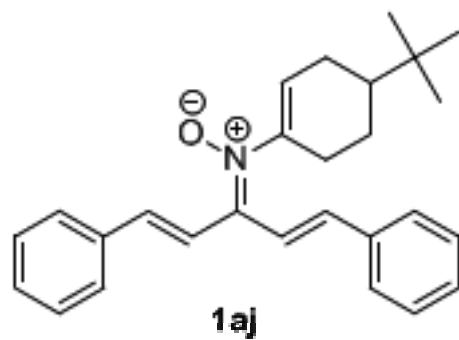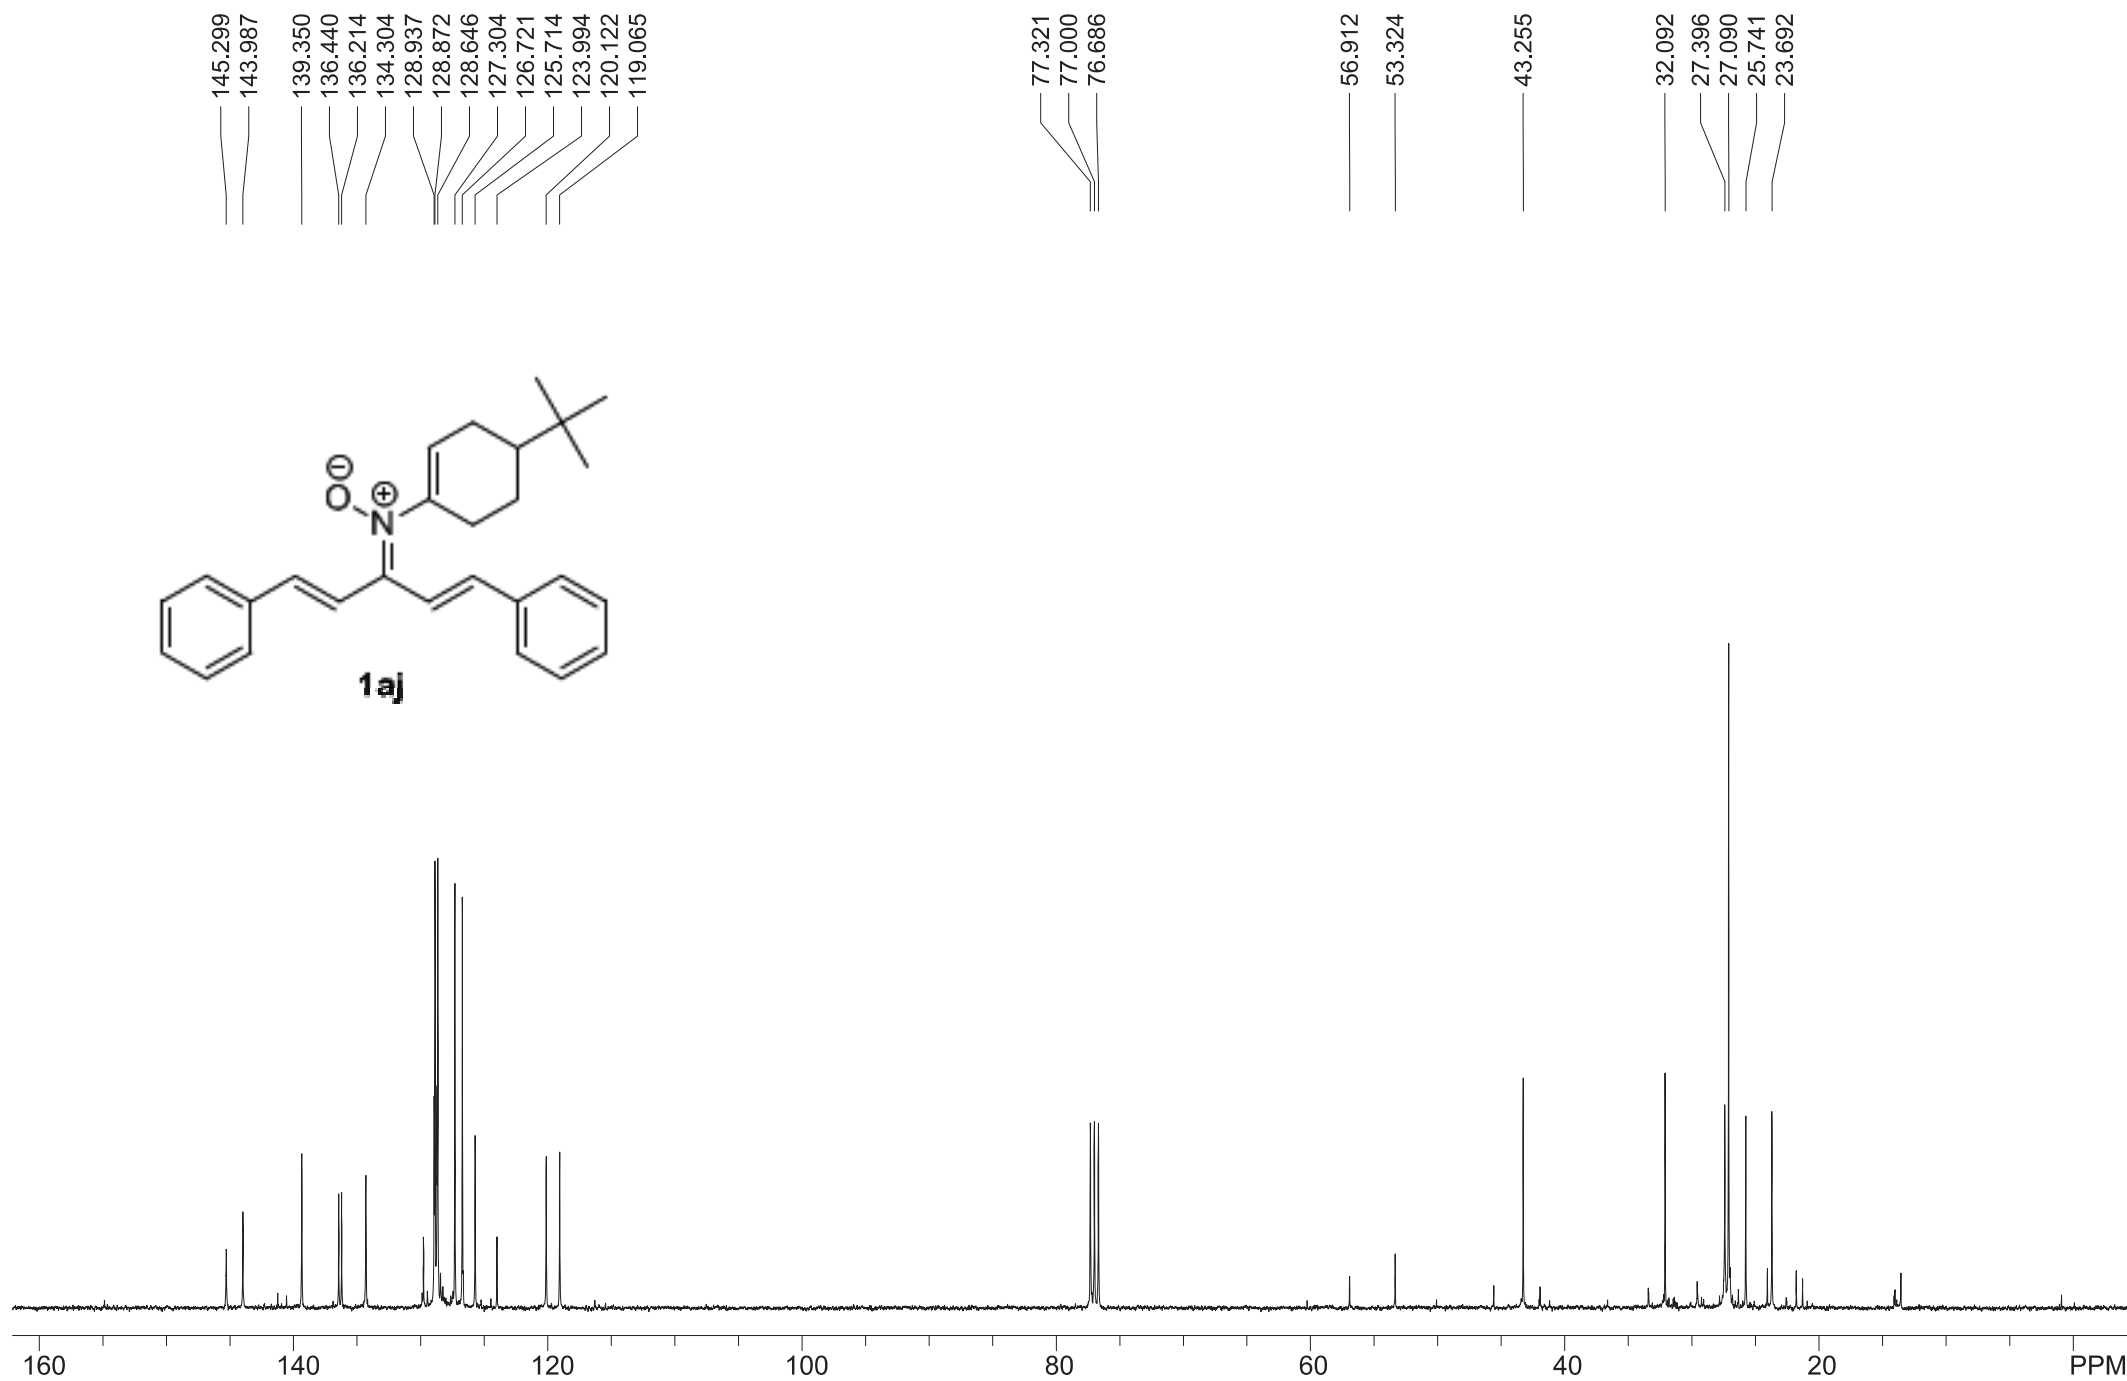

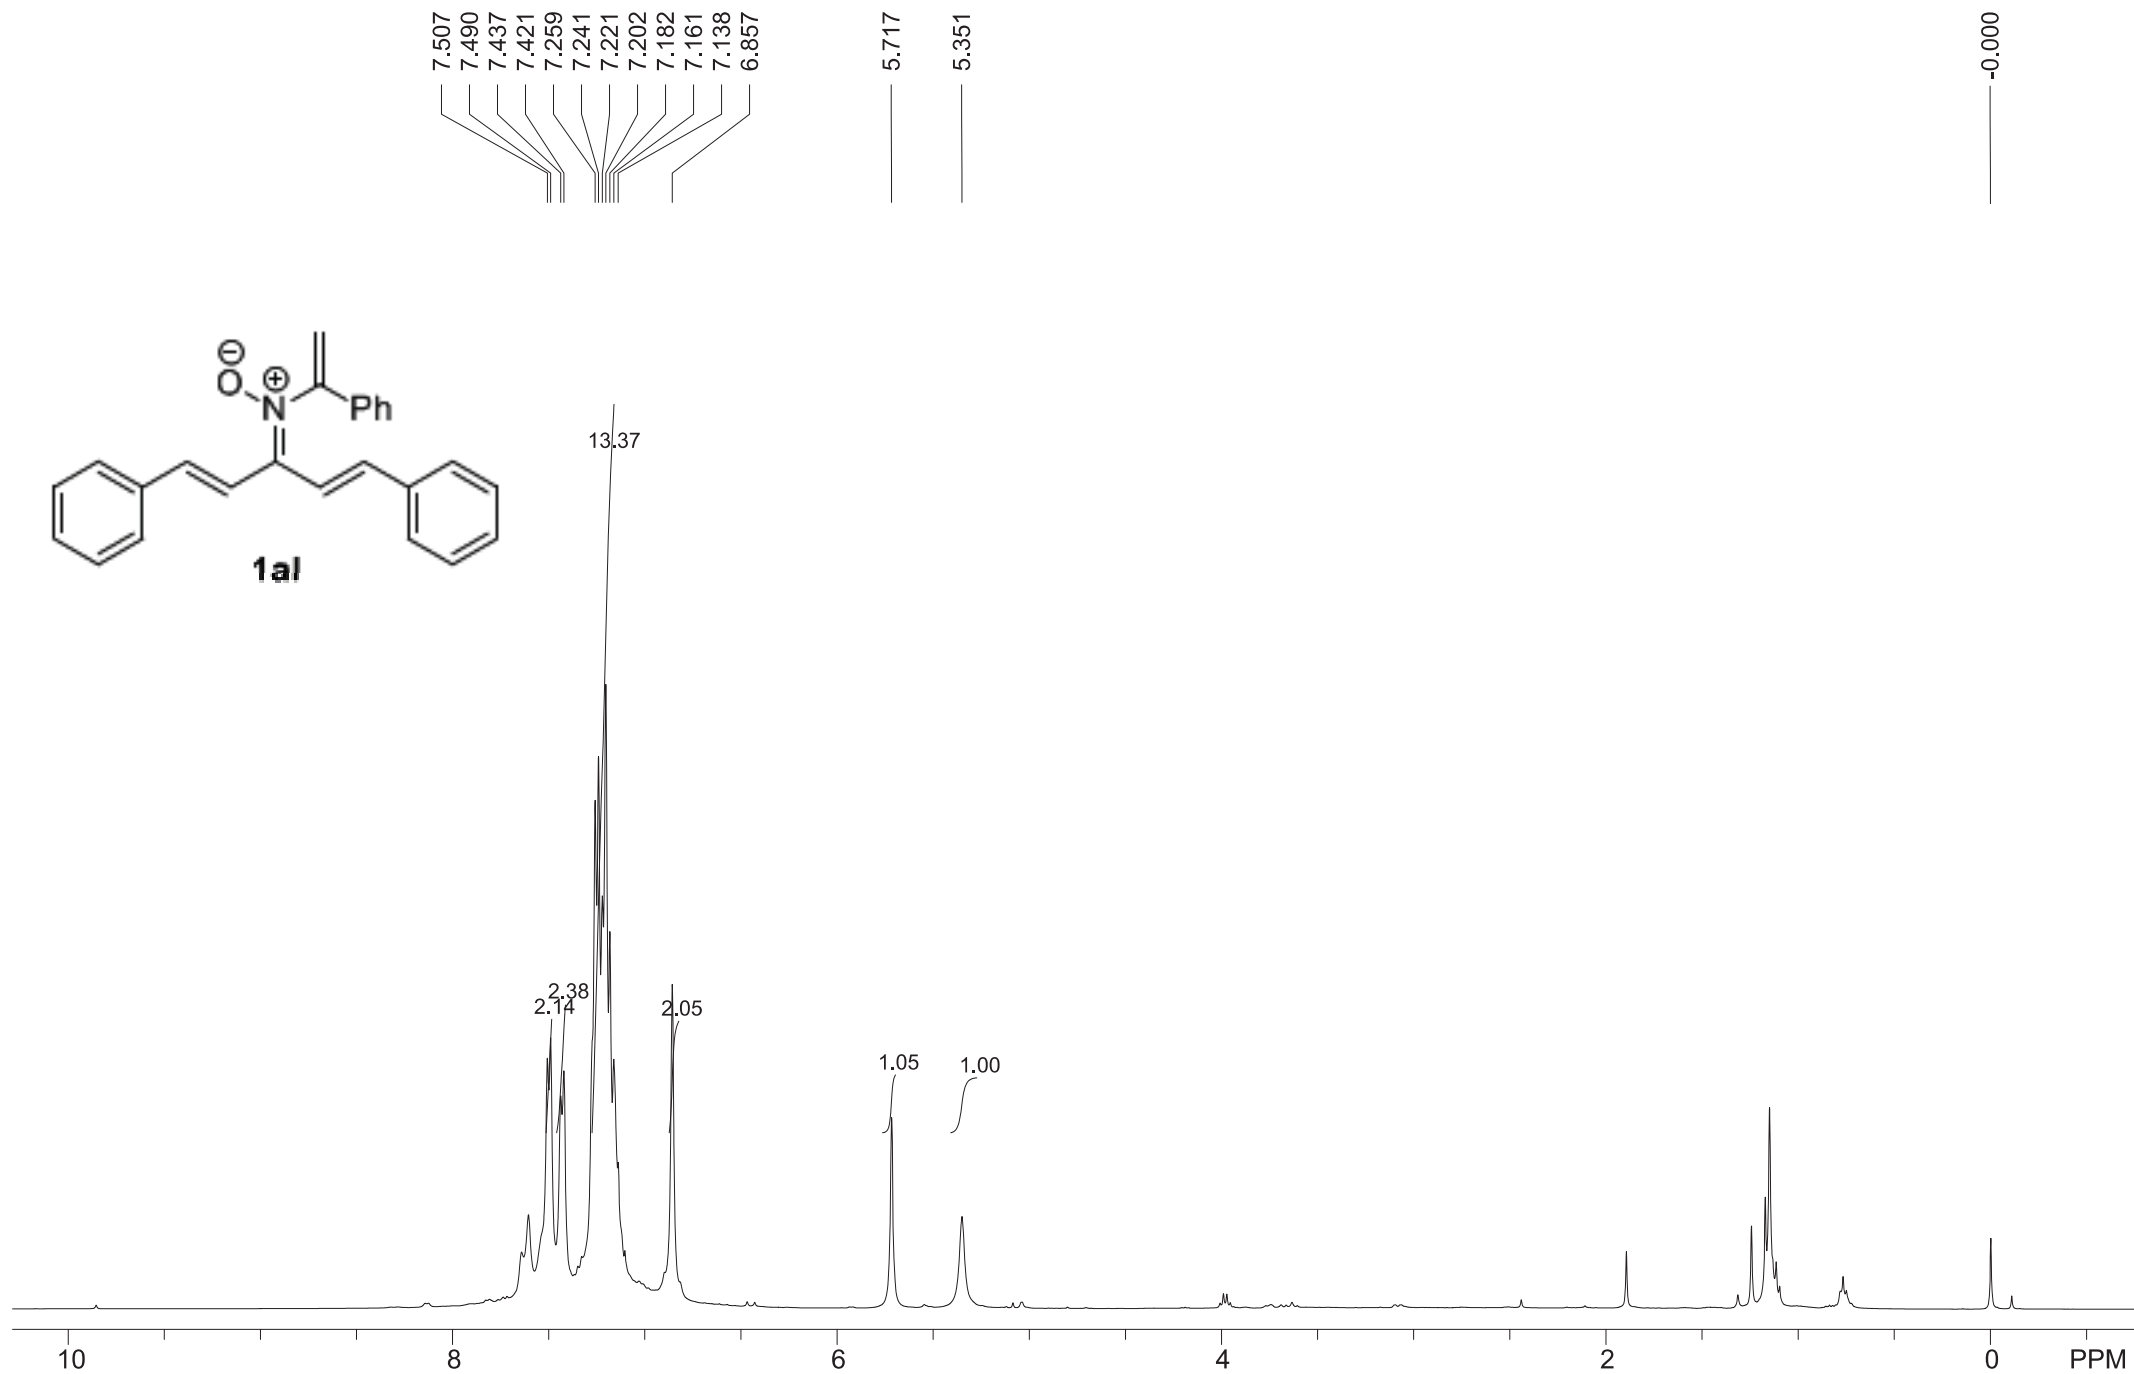

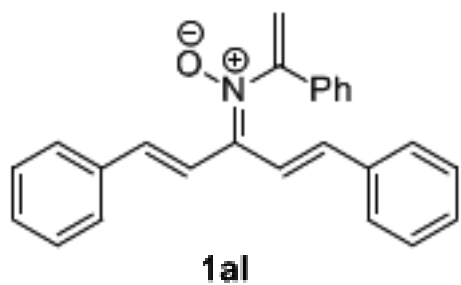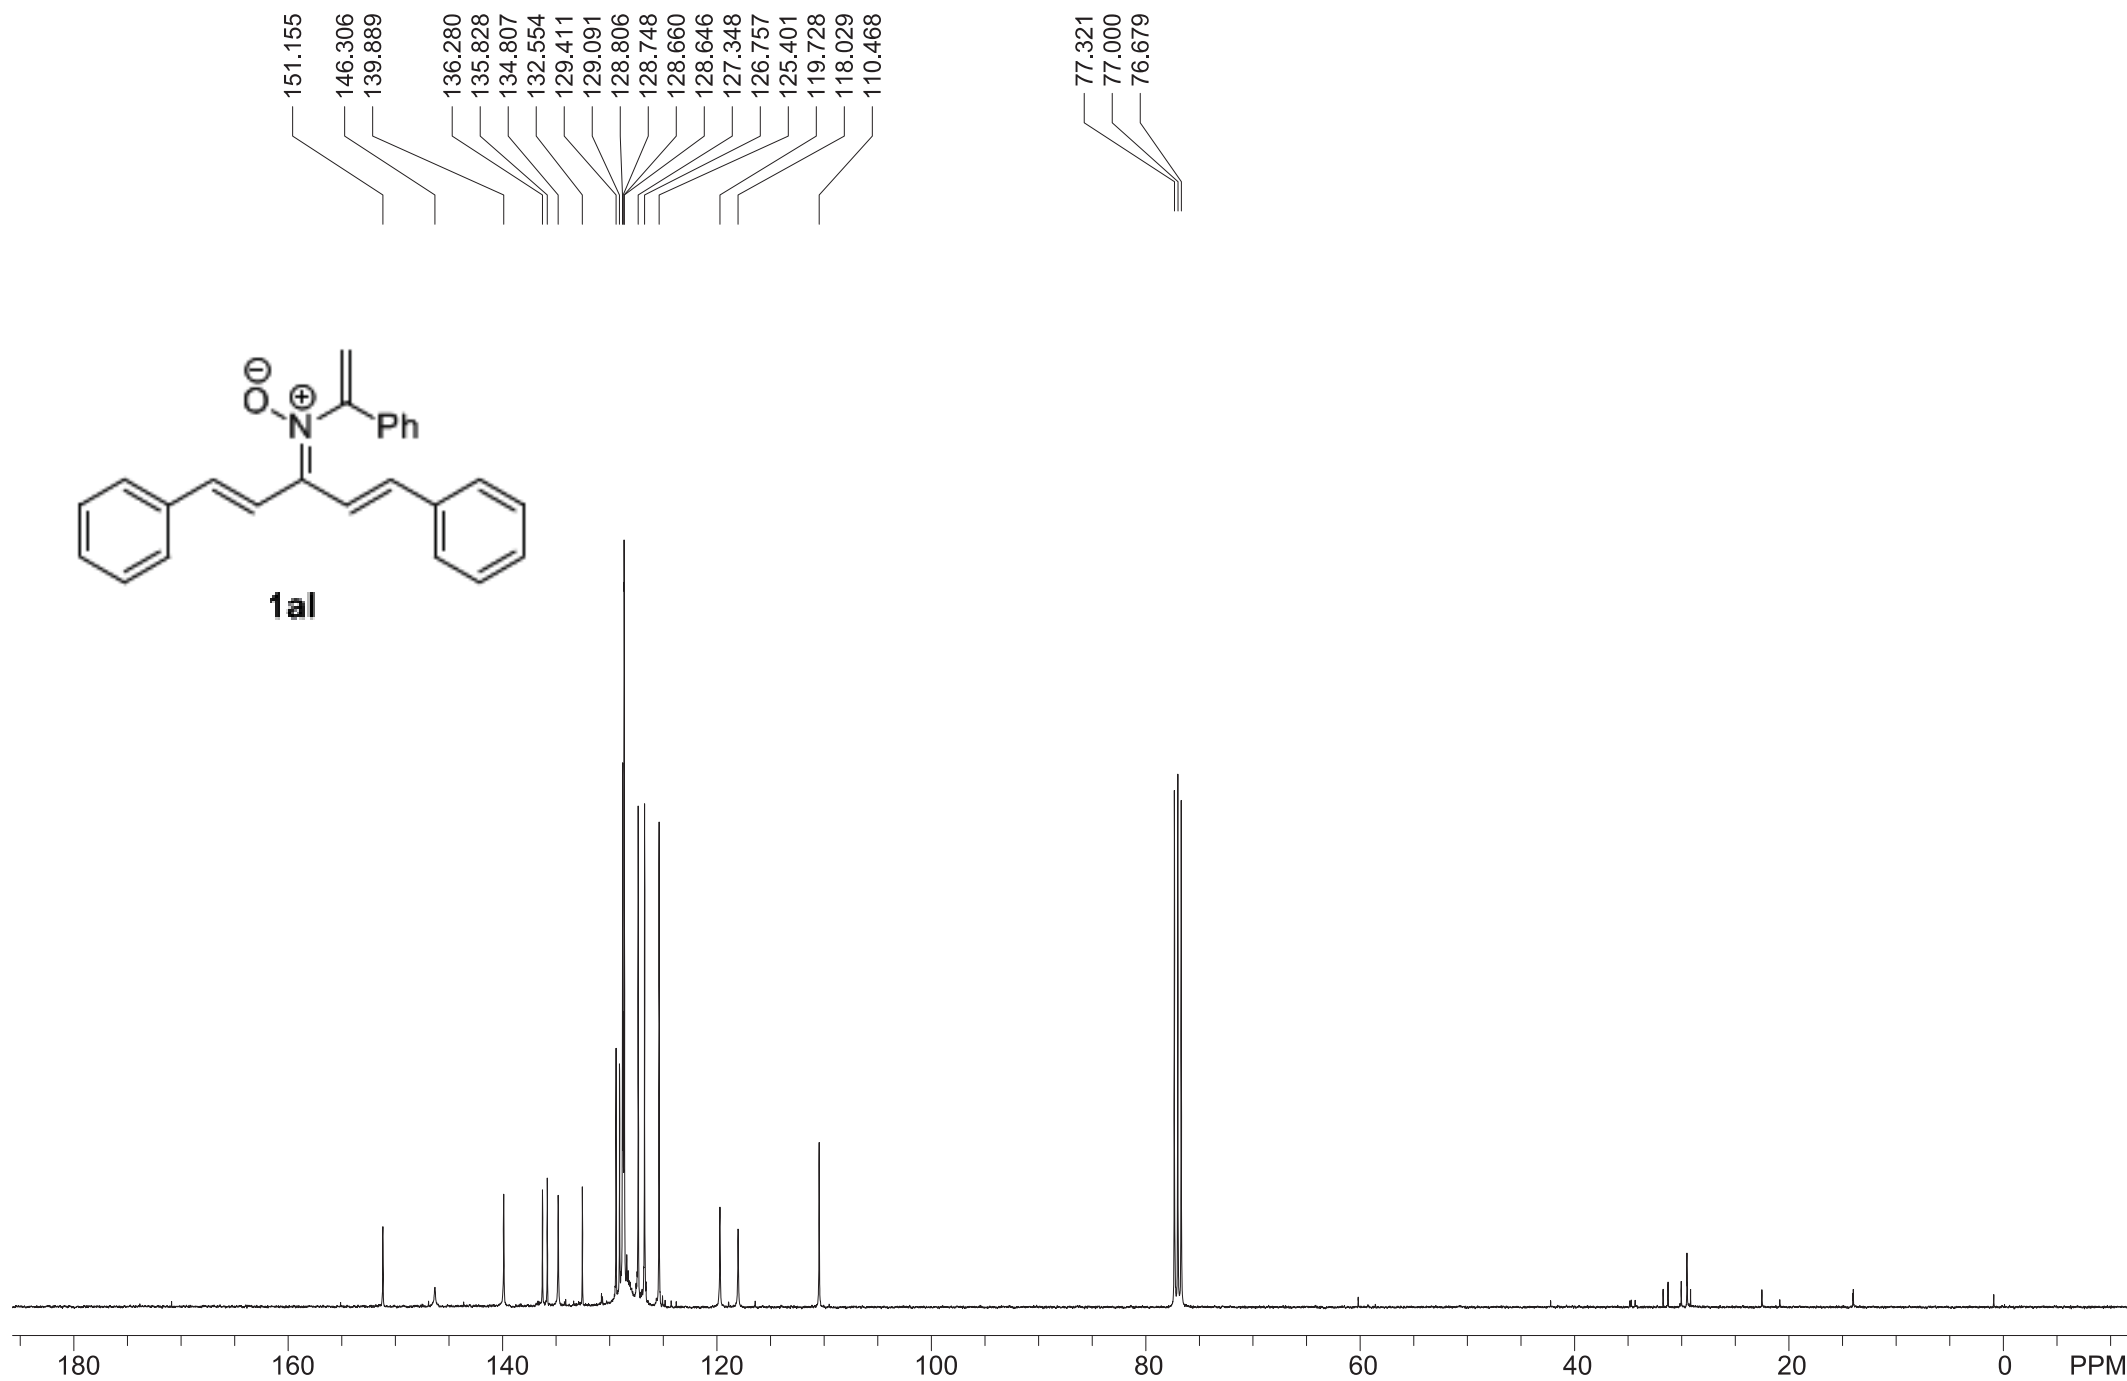

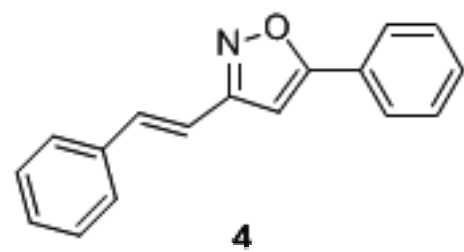

7.736  
7.720  
7.466  
7.448  
7.405  
7.390  
7.371  
7.353  
7.326  
7.309  
7.290  
7.265  
7.247  
7.229  
7.175  
7.164  
7.134  
7.101  
7.059  
6.672

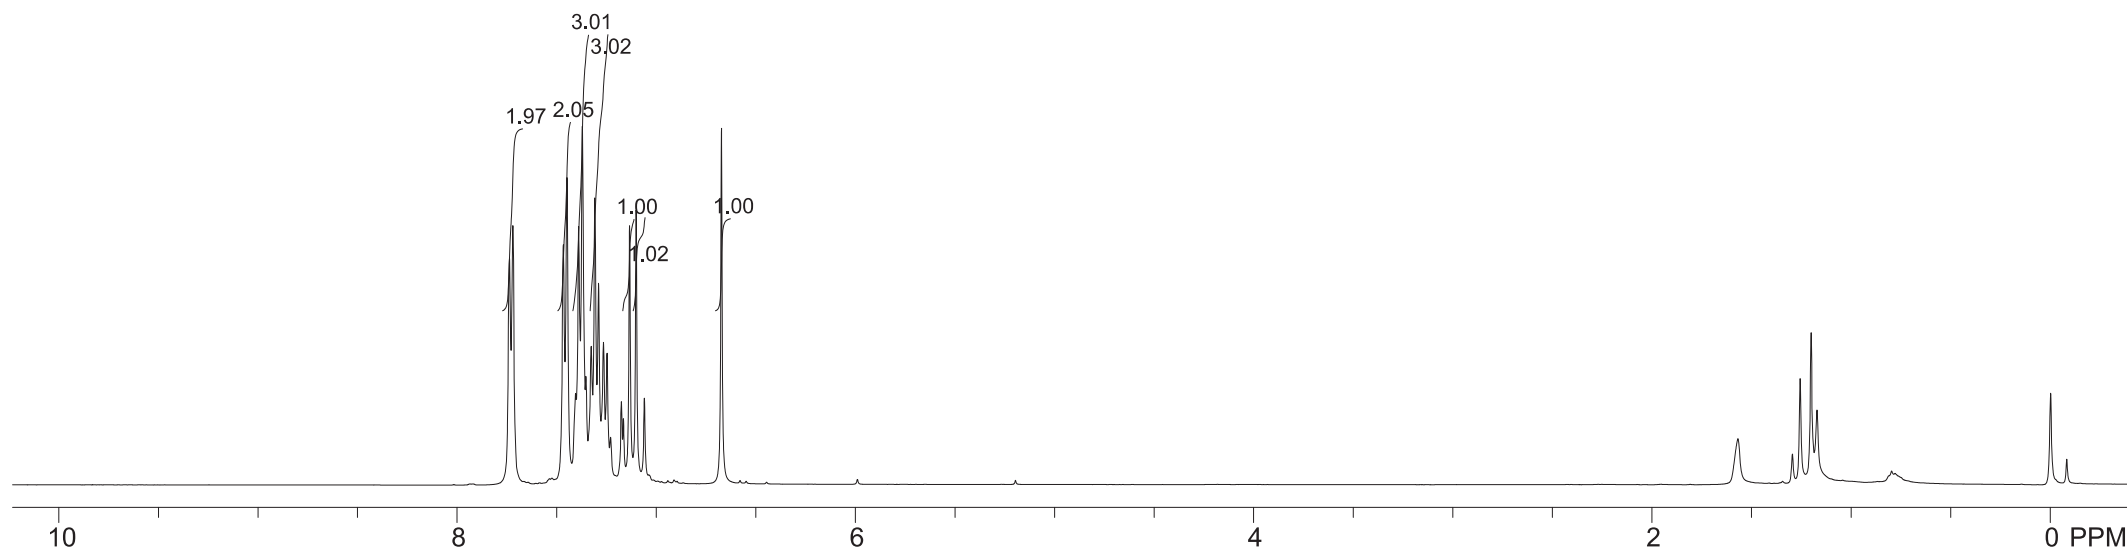

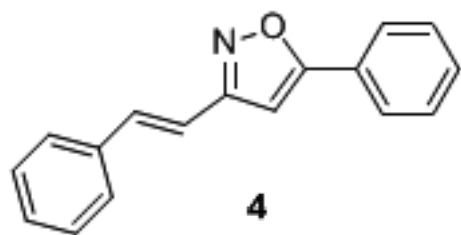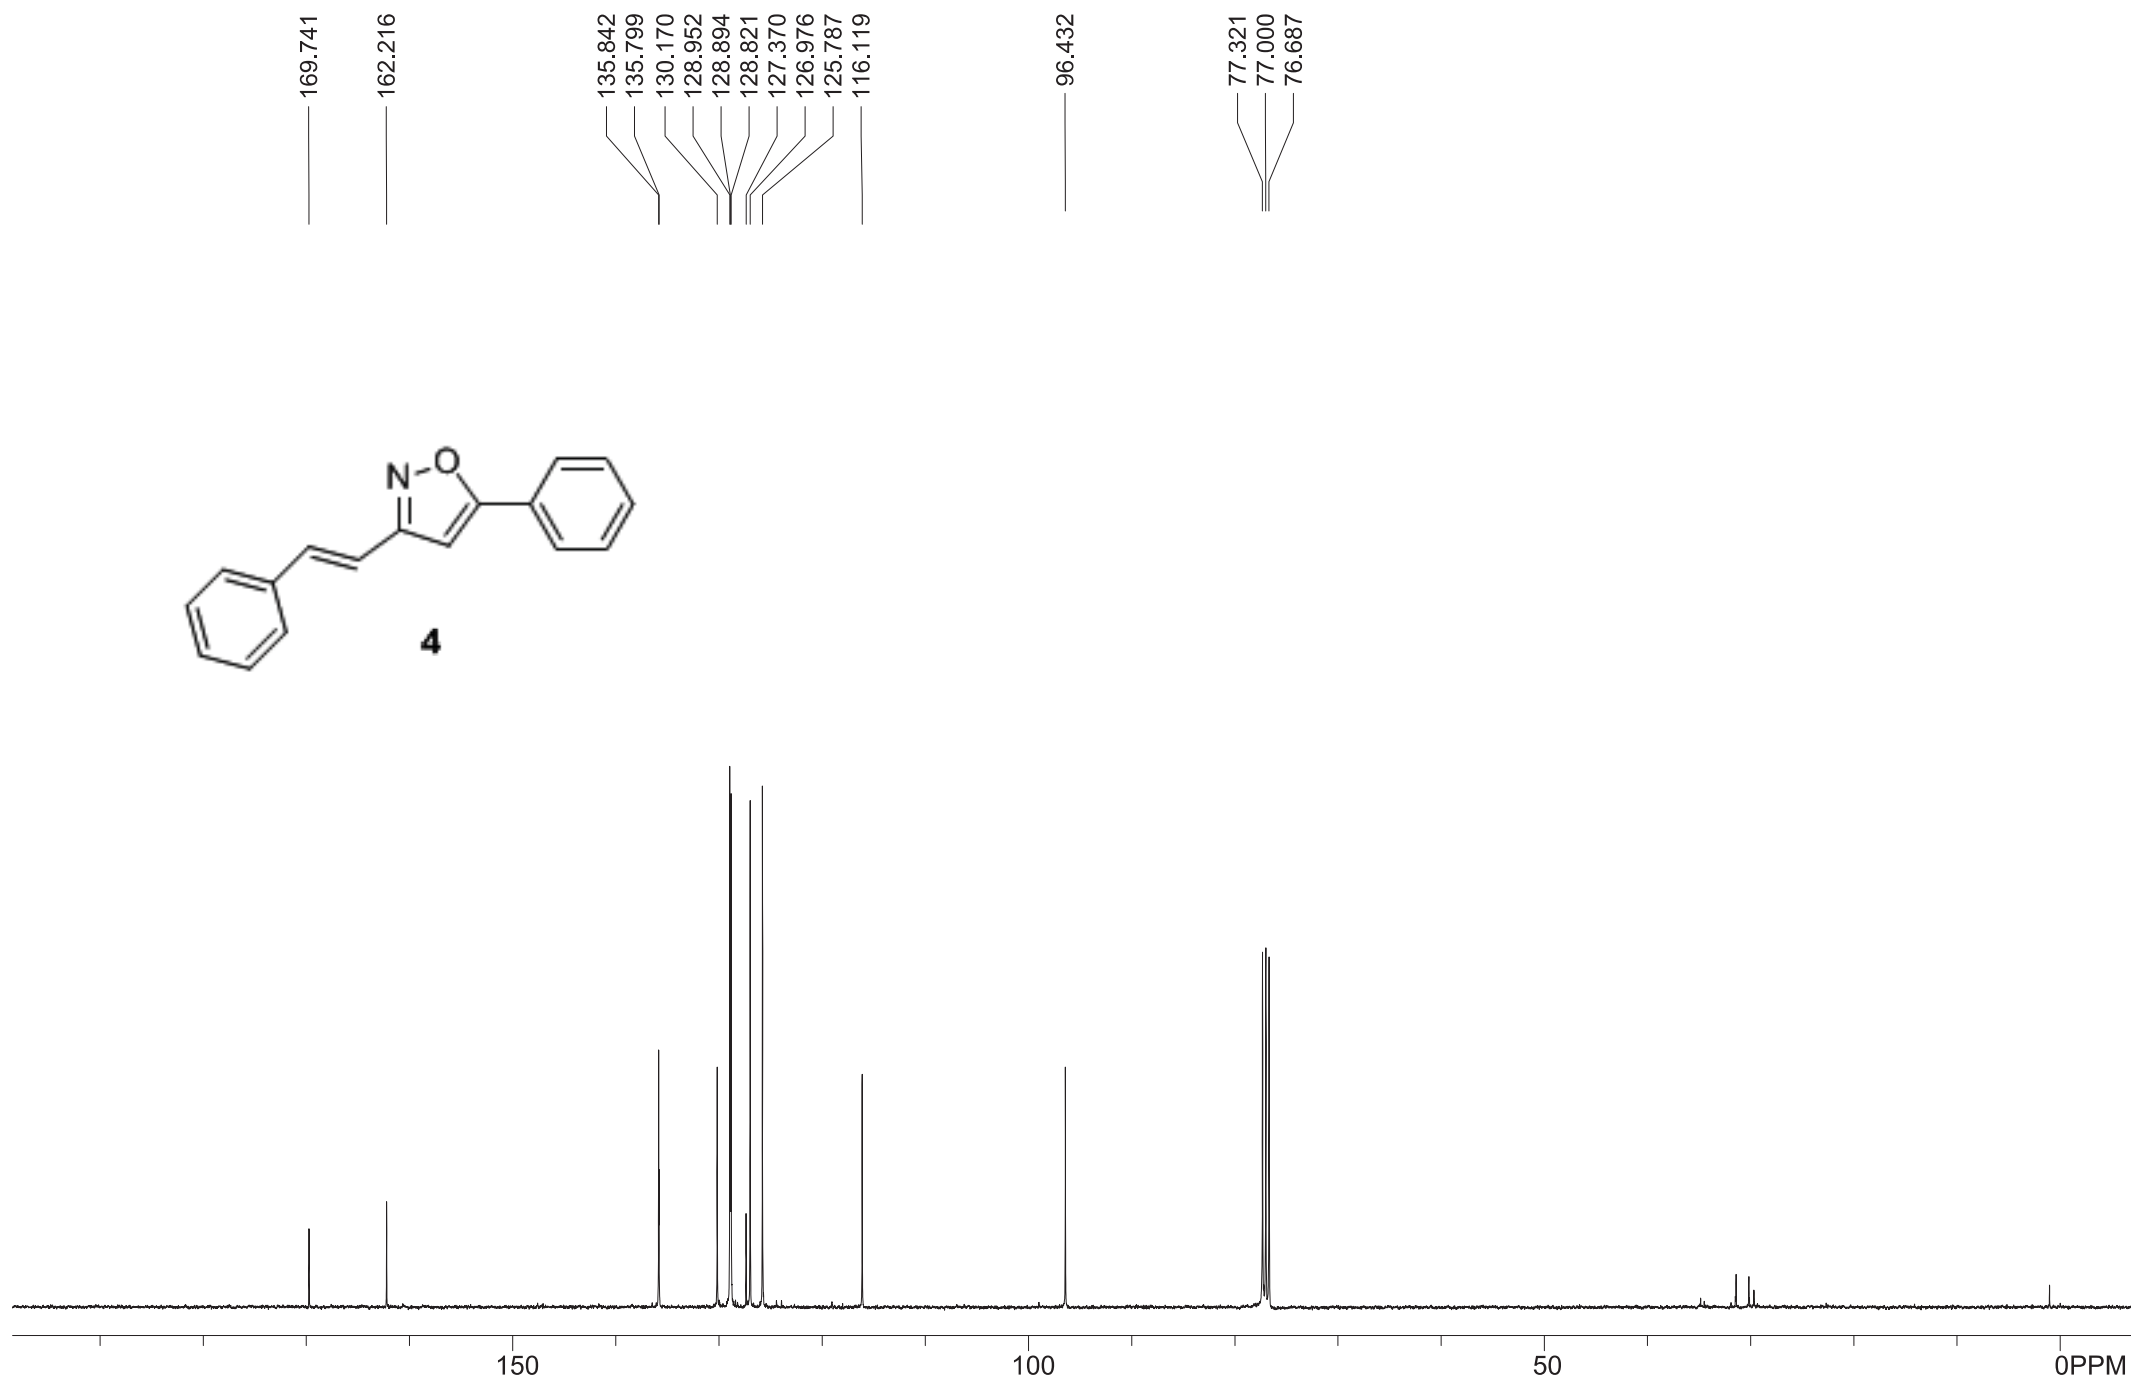

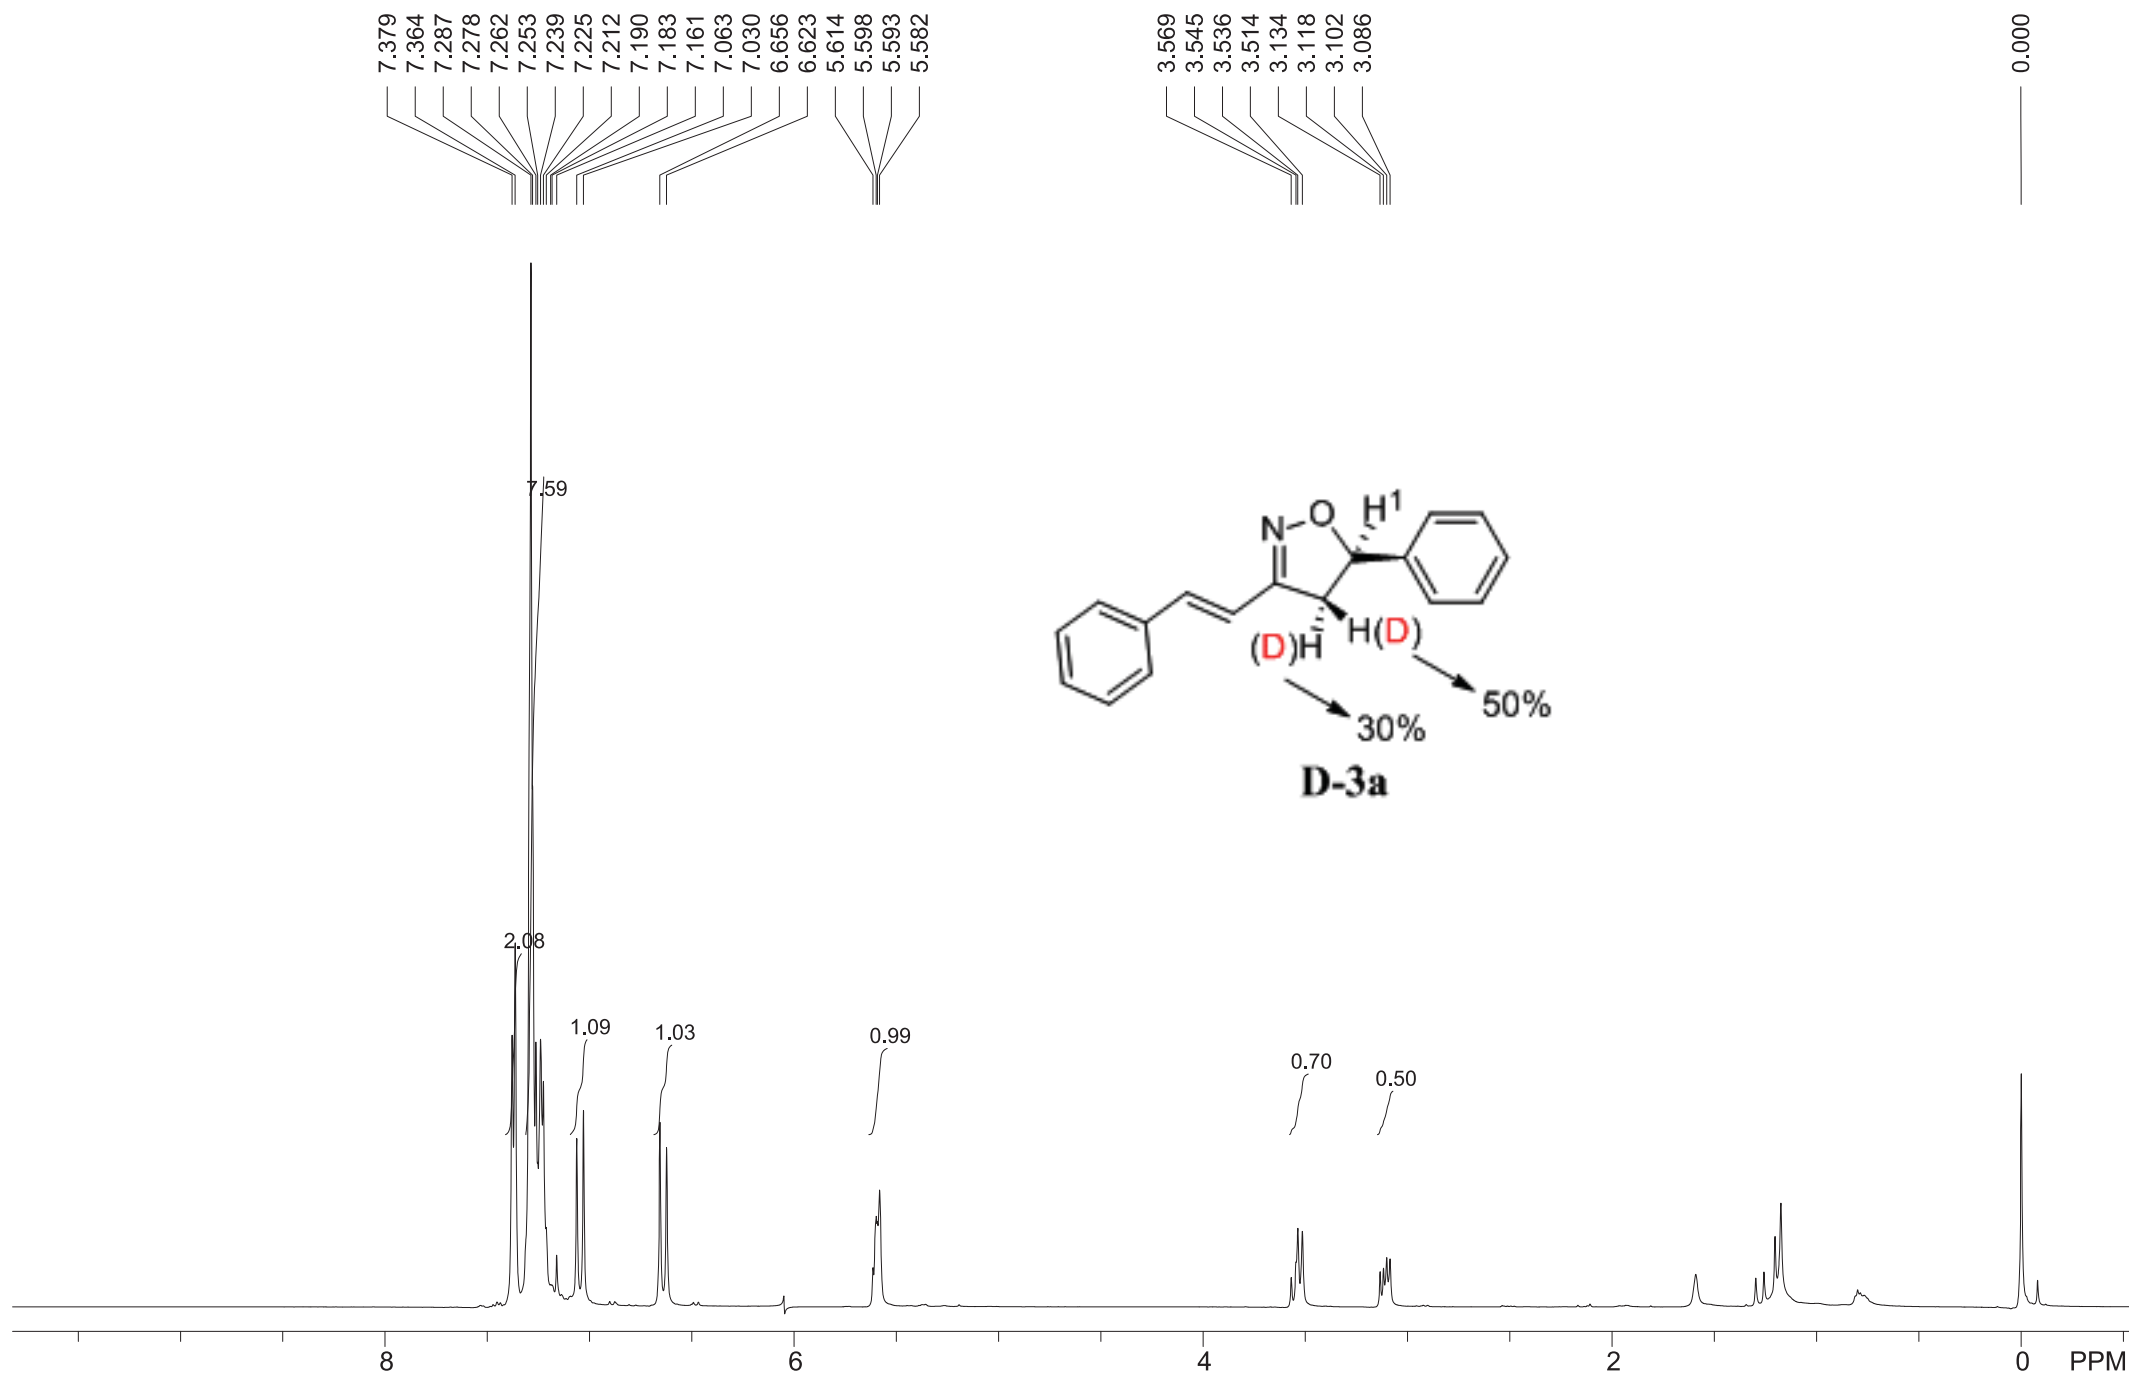

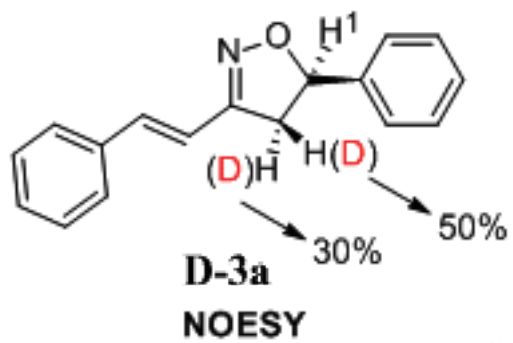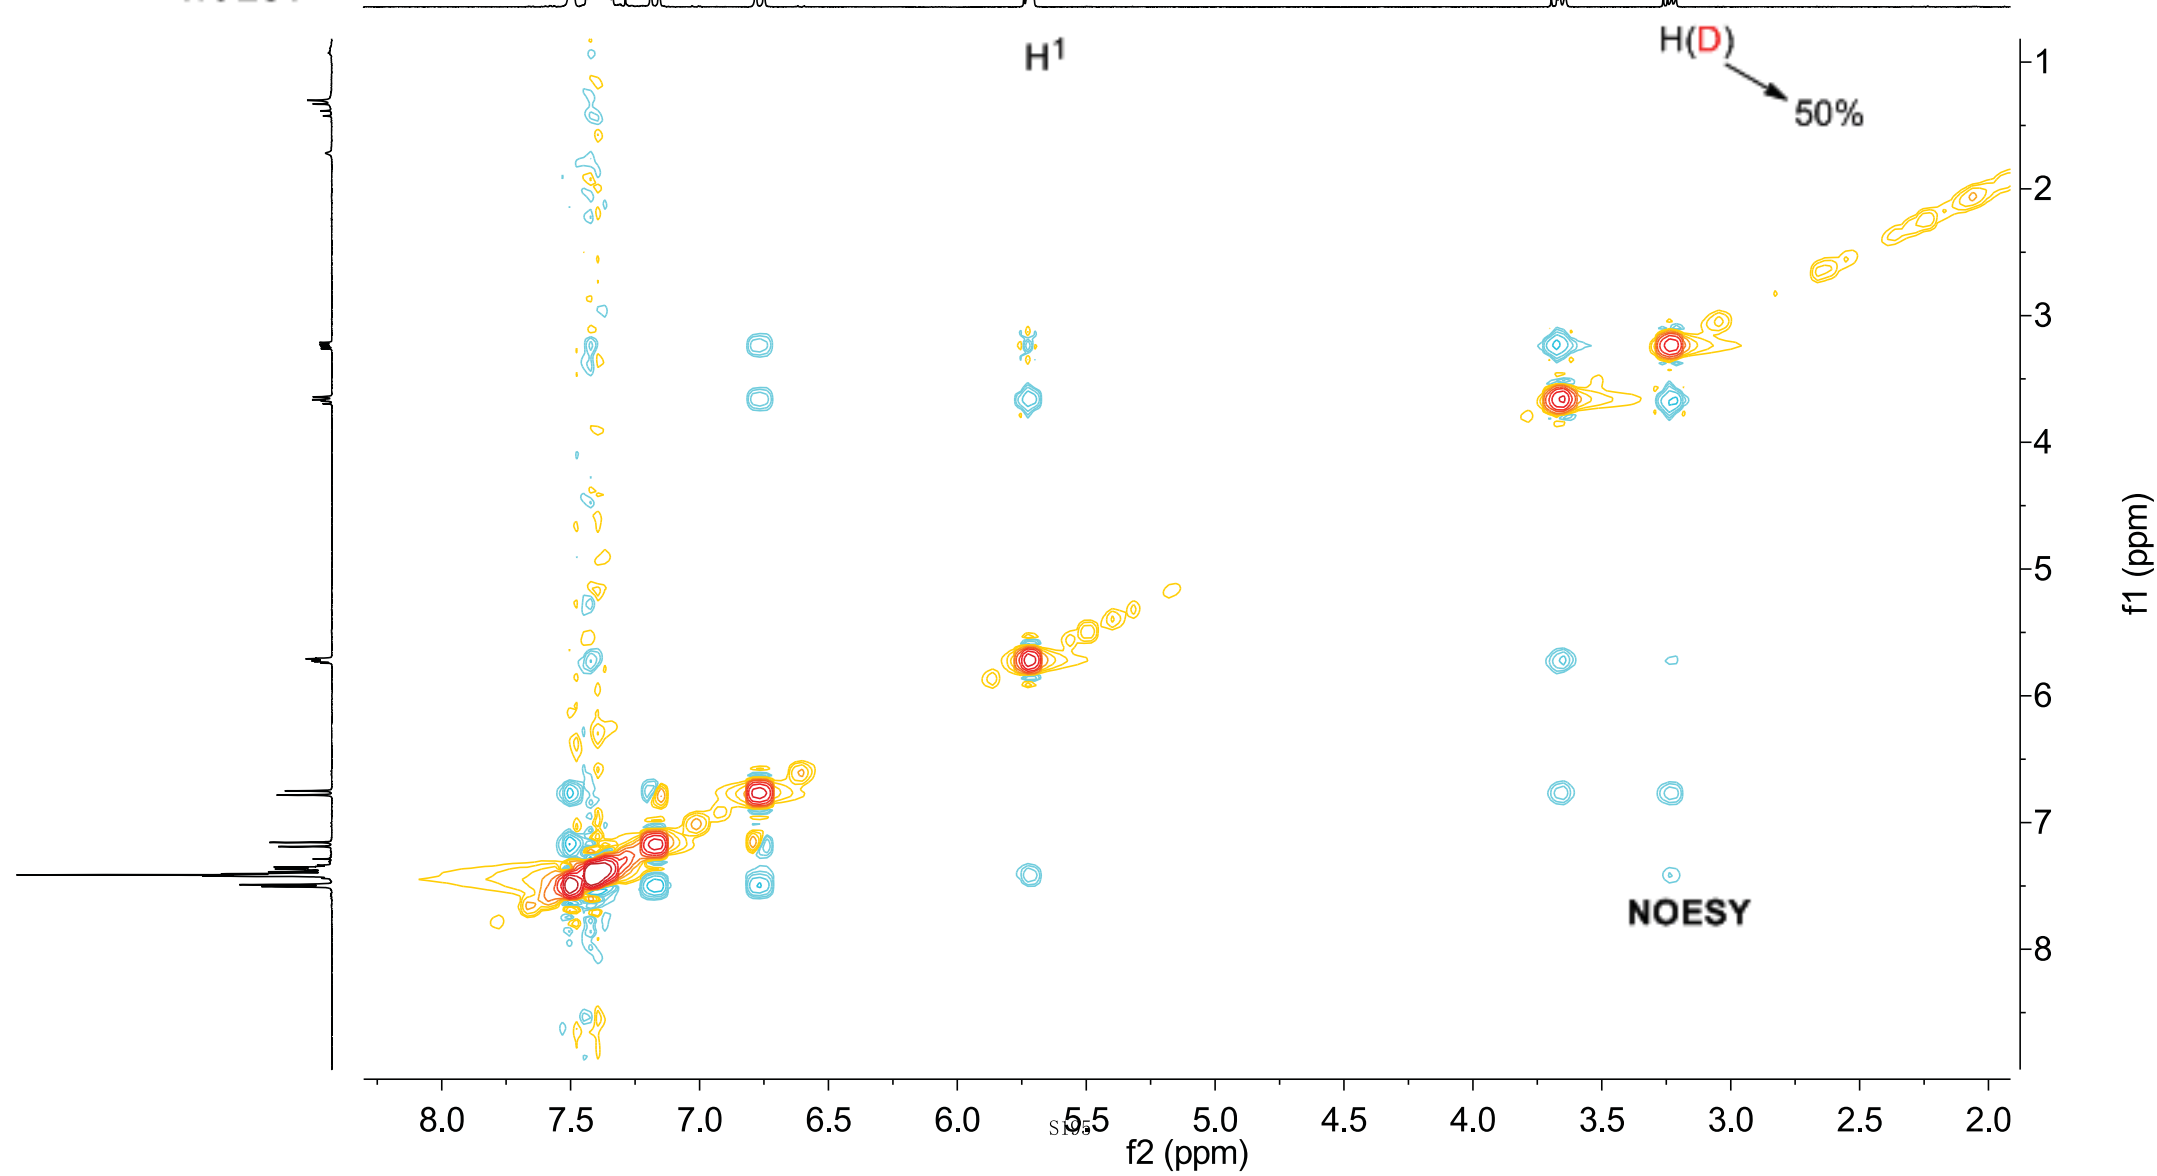

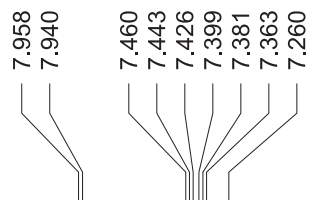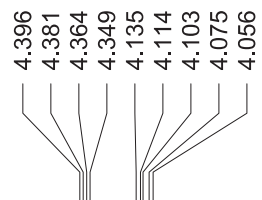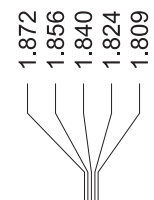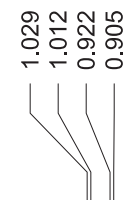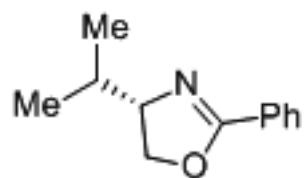

**L5**

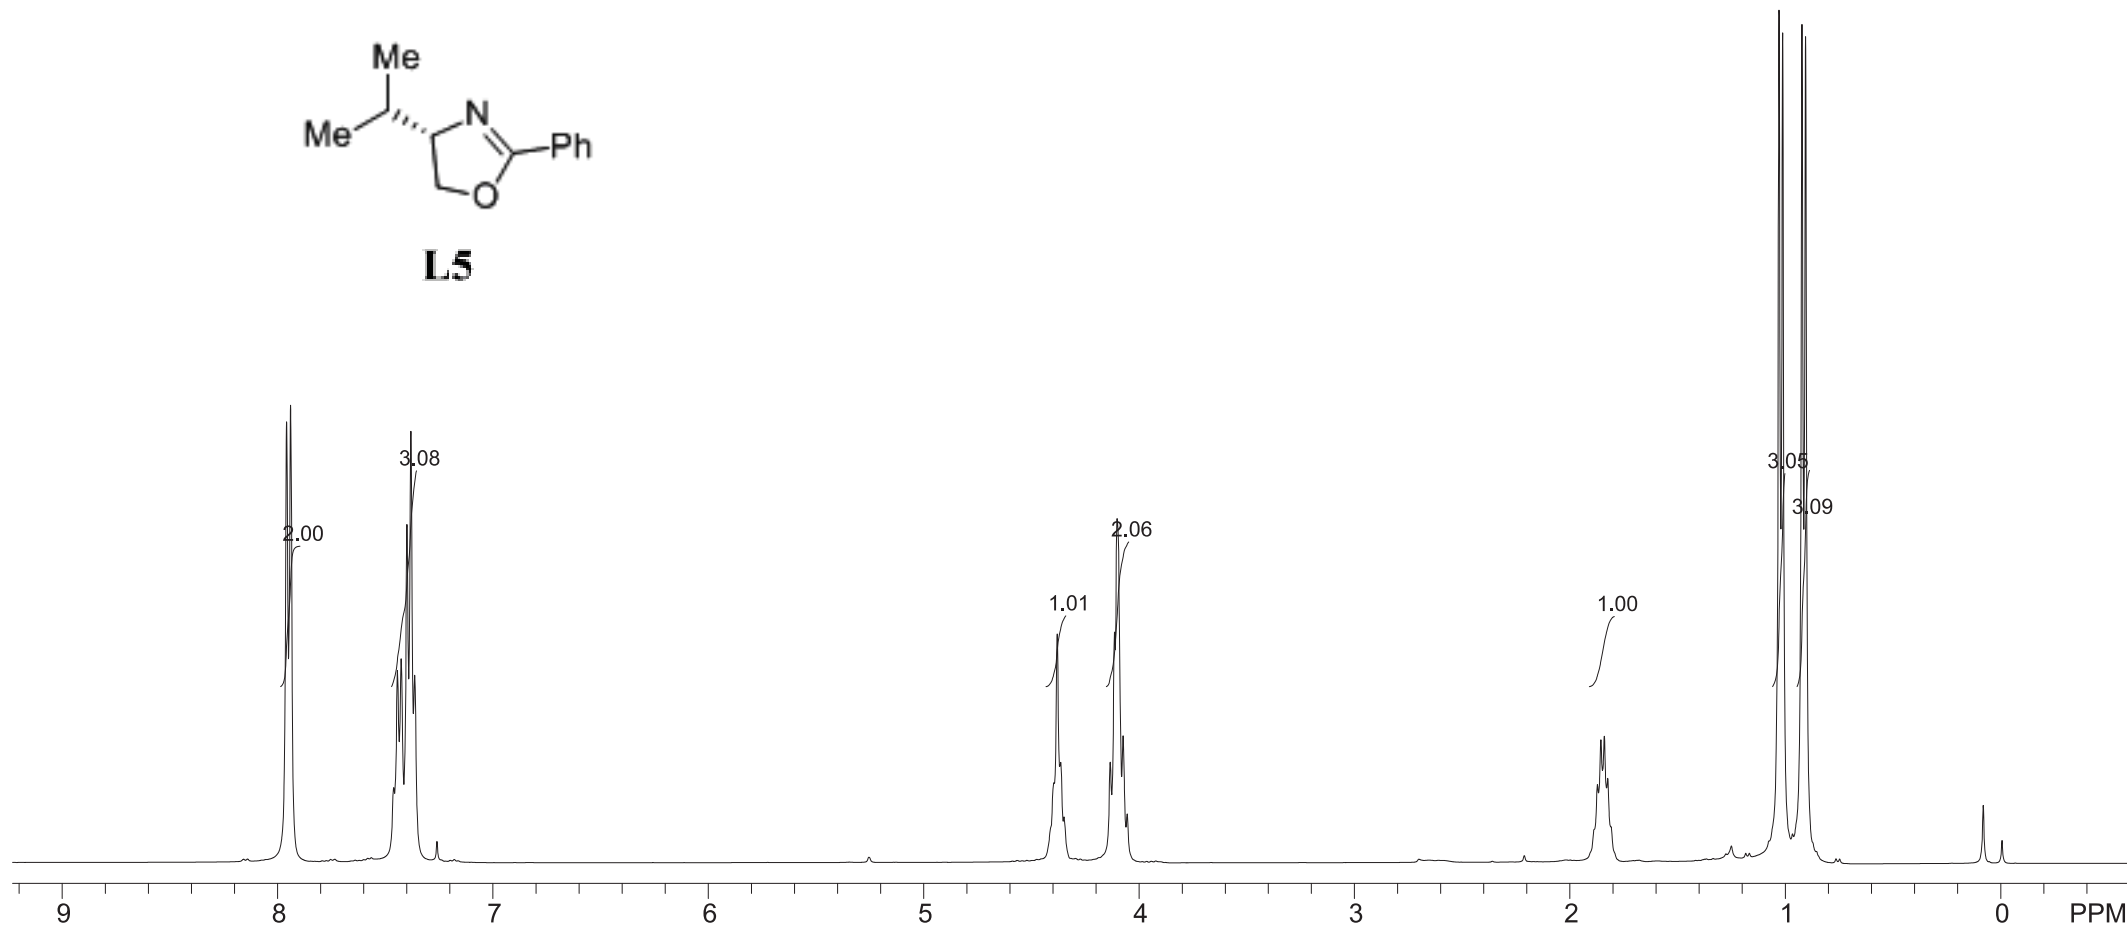



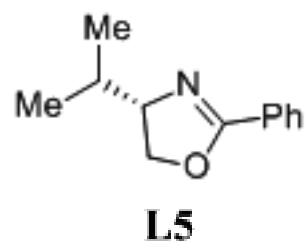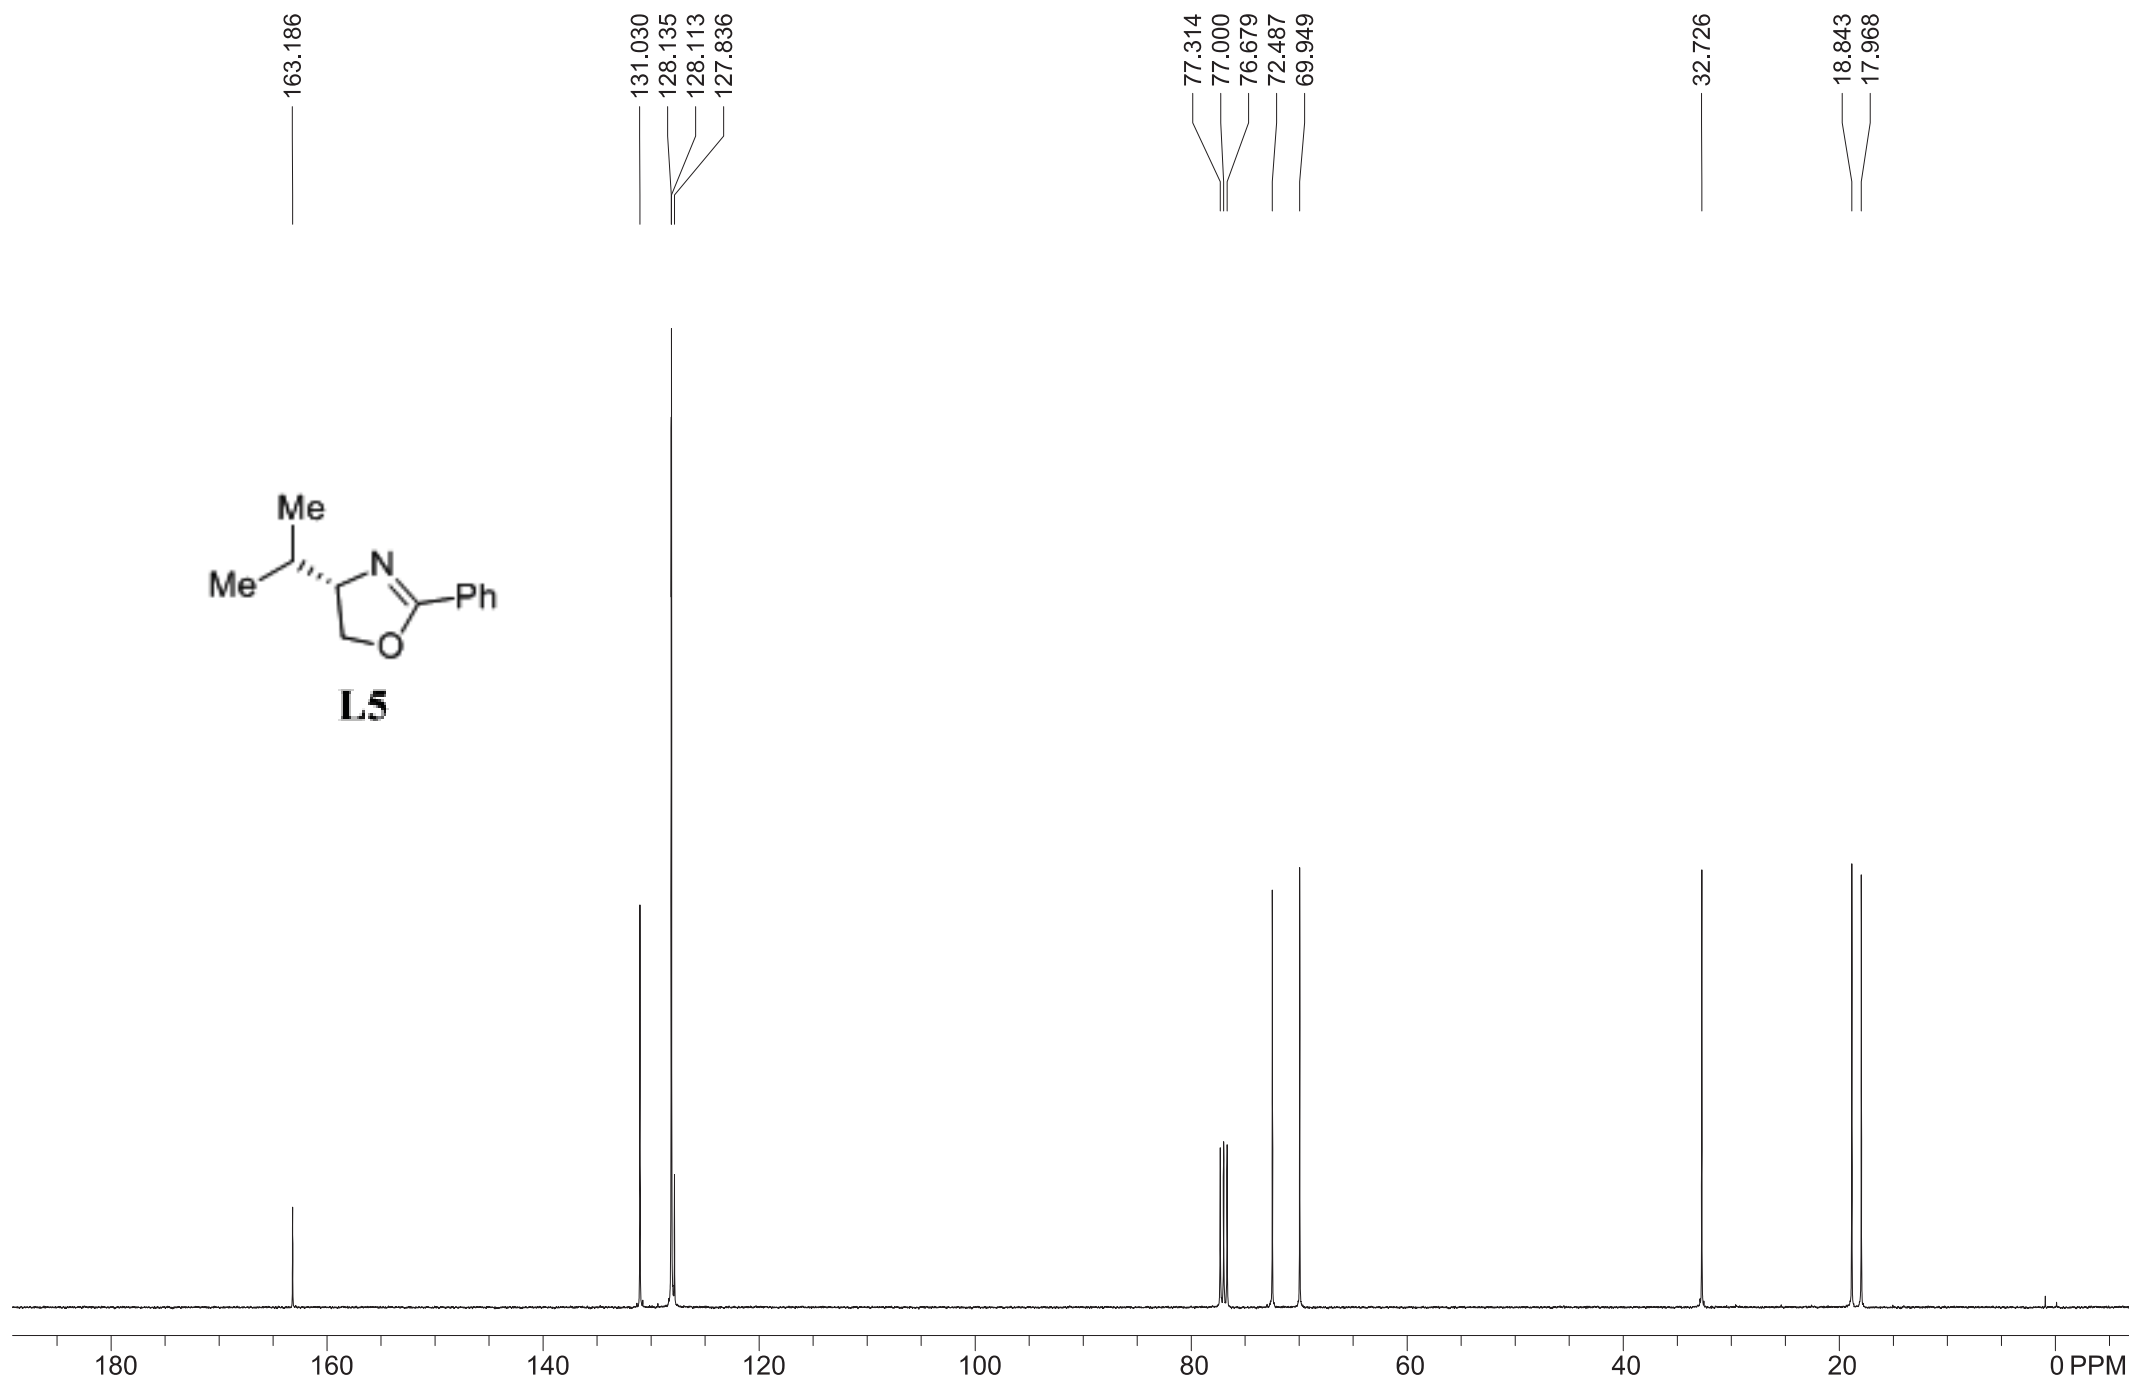

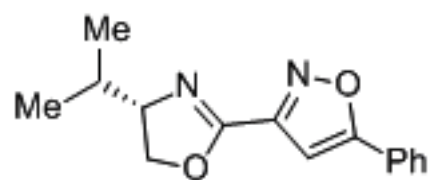

**L6**

7.490  
7.473  
7.383  
7.366  
7.362  
7.348  
7.326  
7.320  
7.264  
6.687  
6.647

4.367  
4.350  
4.335  
4.319  
4.068  
4.046  
4.033  
4.015

1.835  
1.819  
1.804  
1.788

1.029  
1.013  
0.935  
0.918

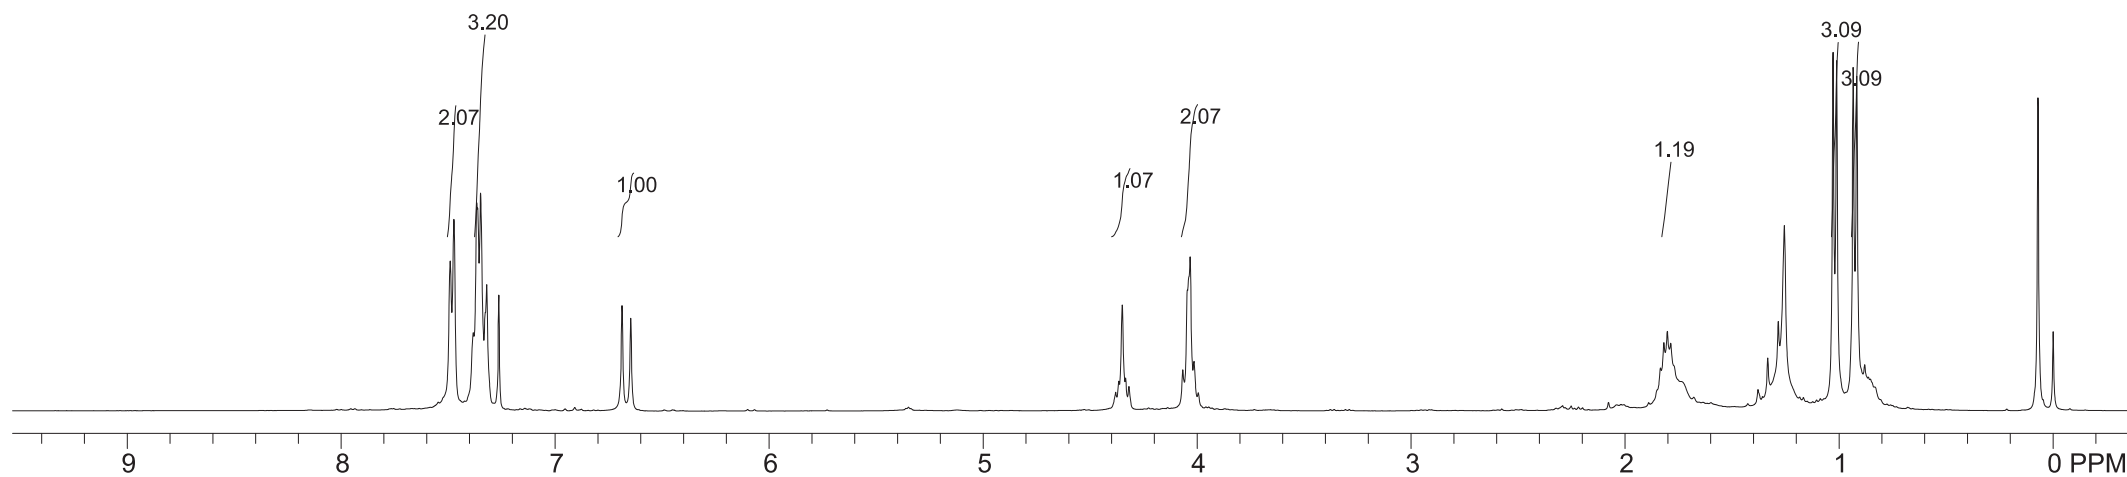

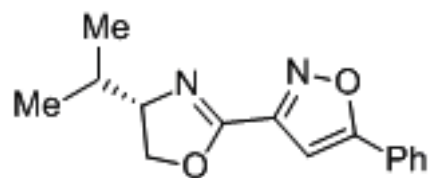

**L6**

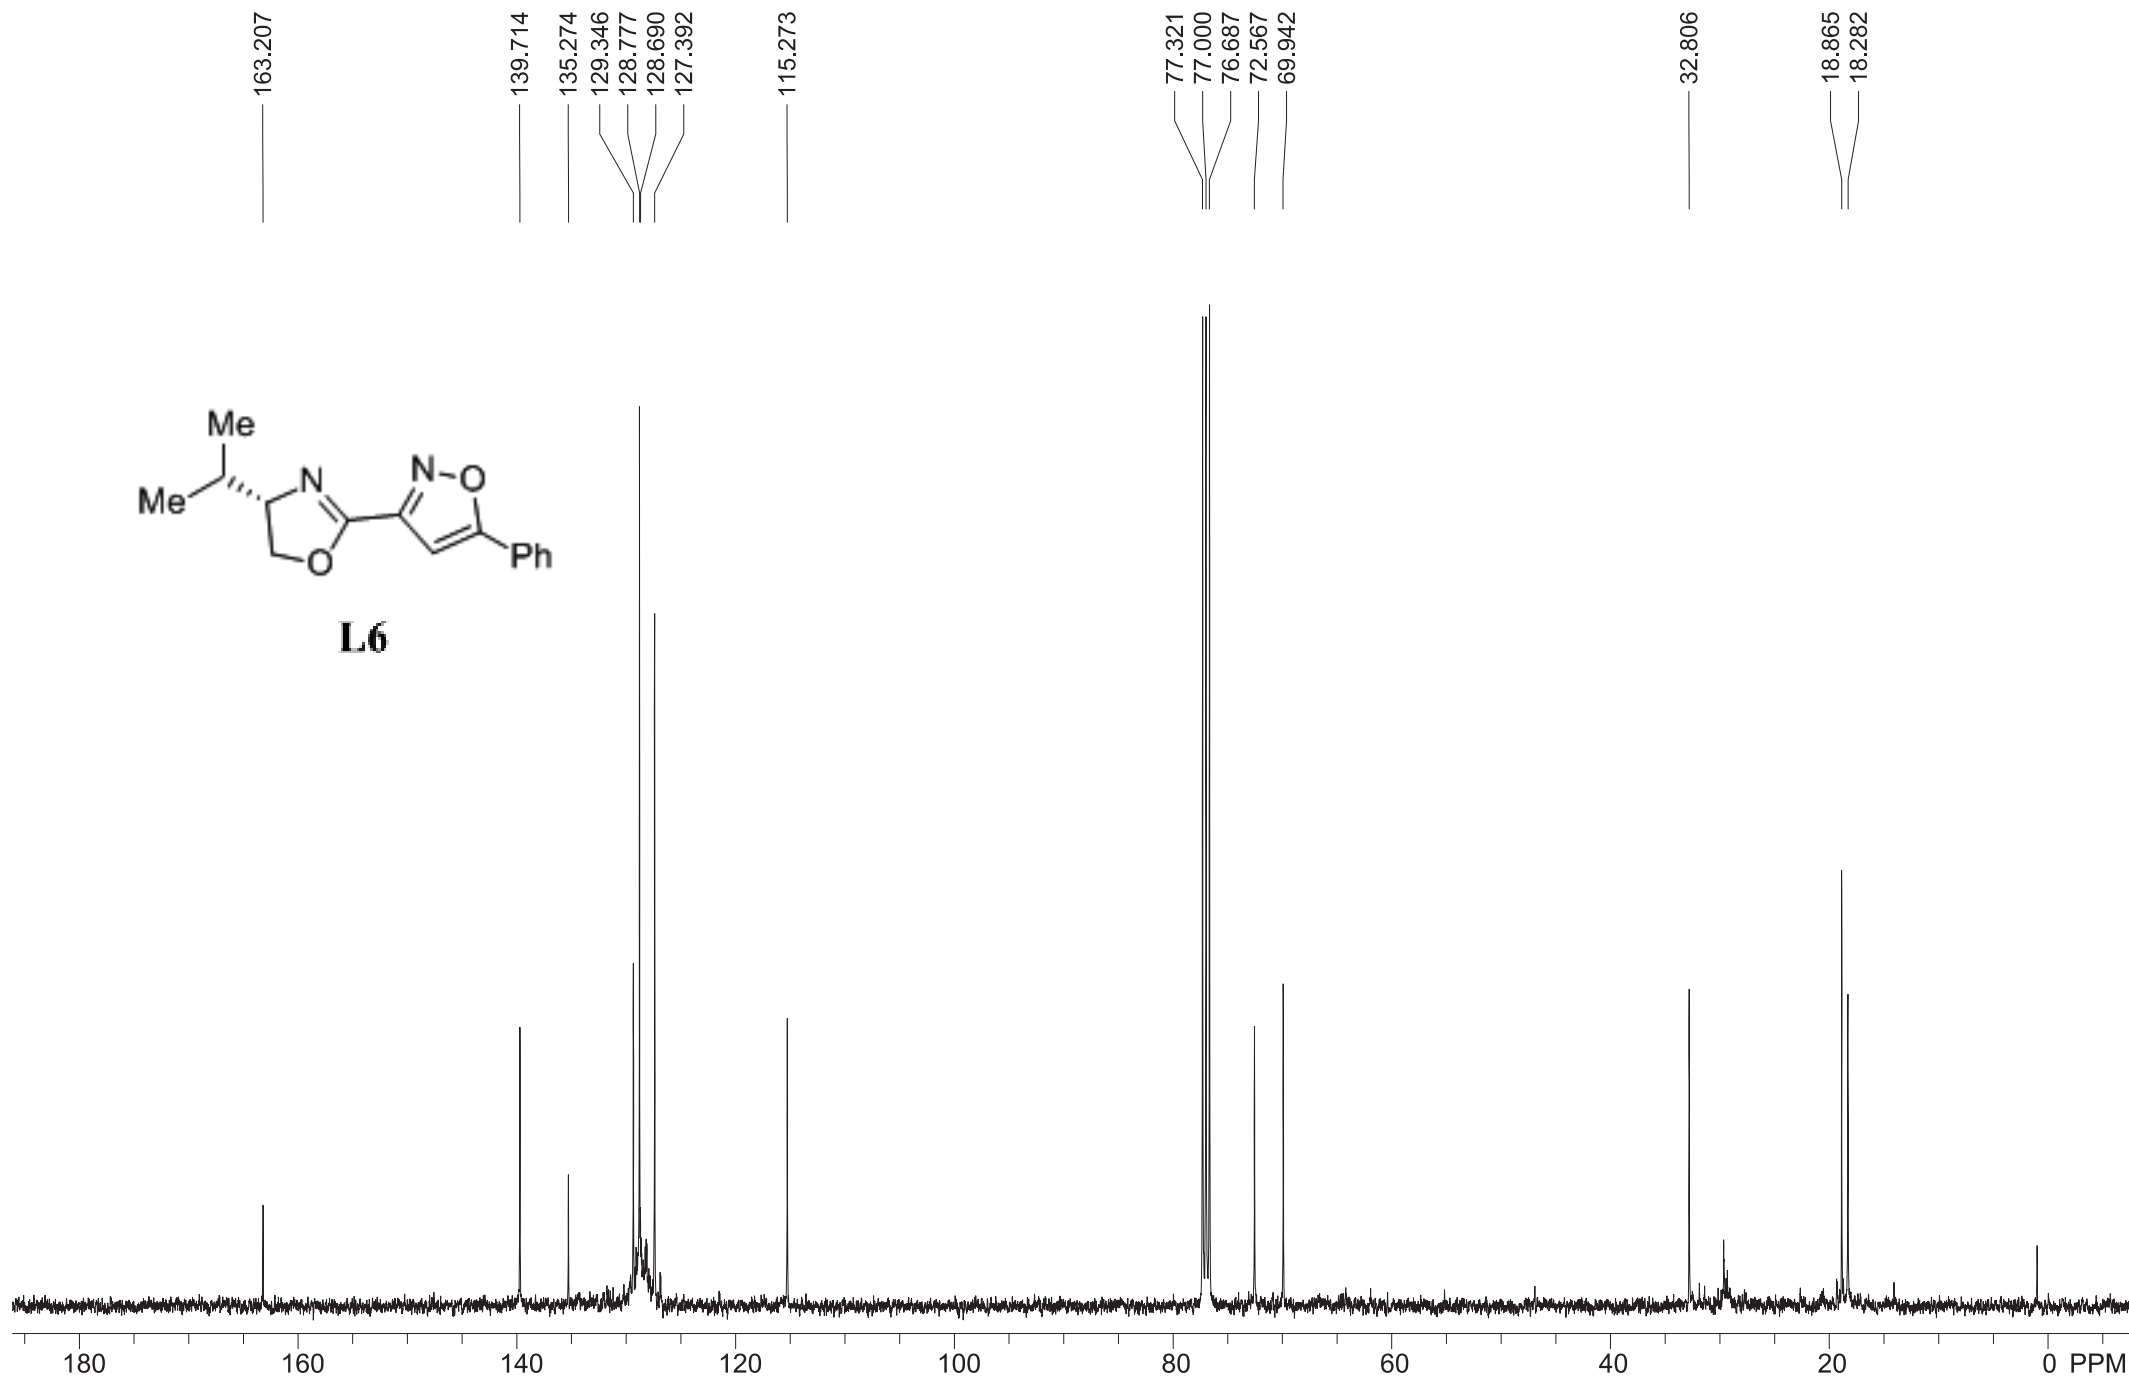

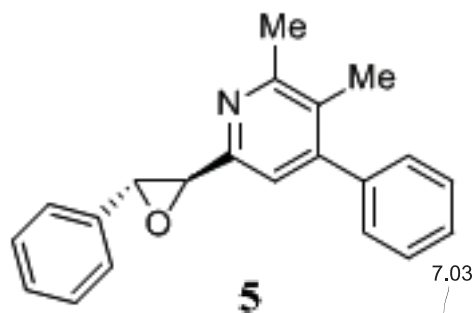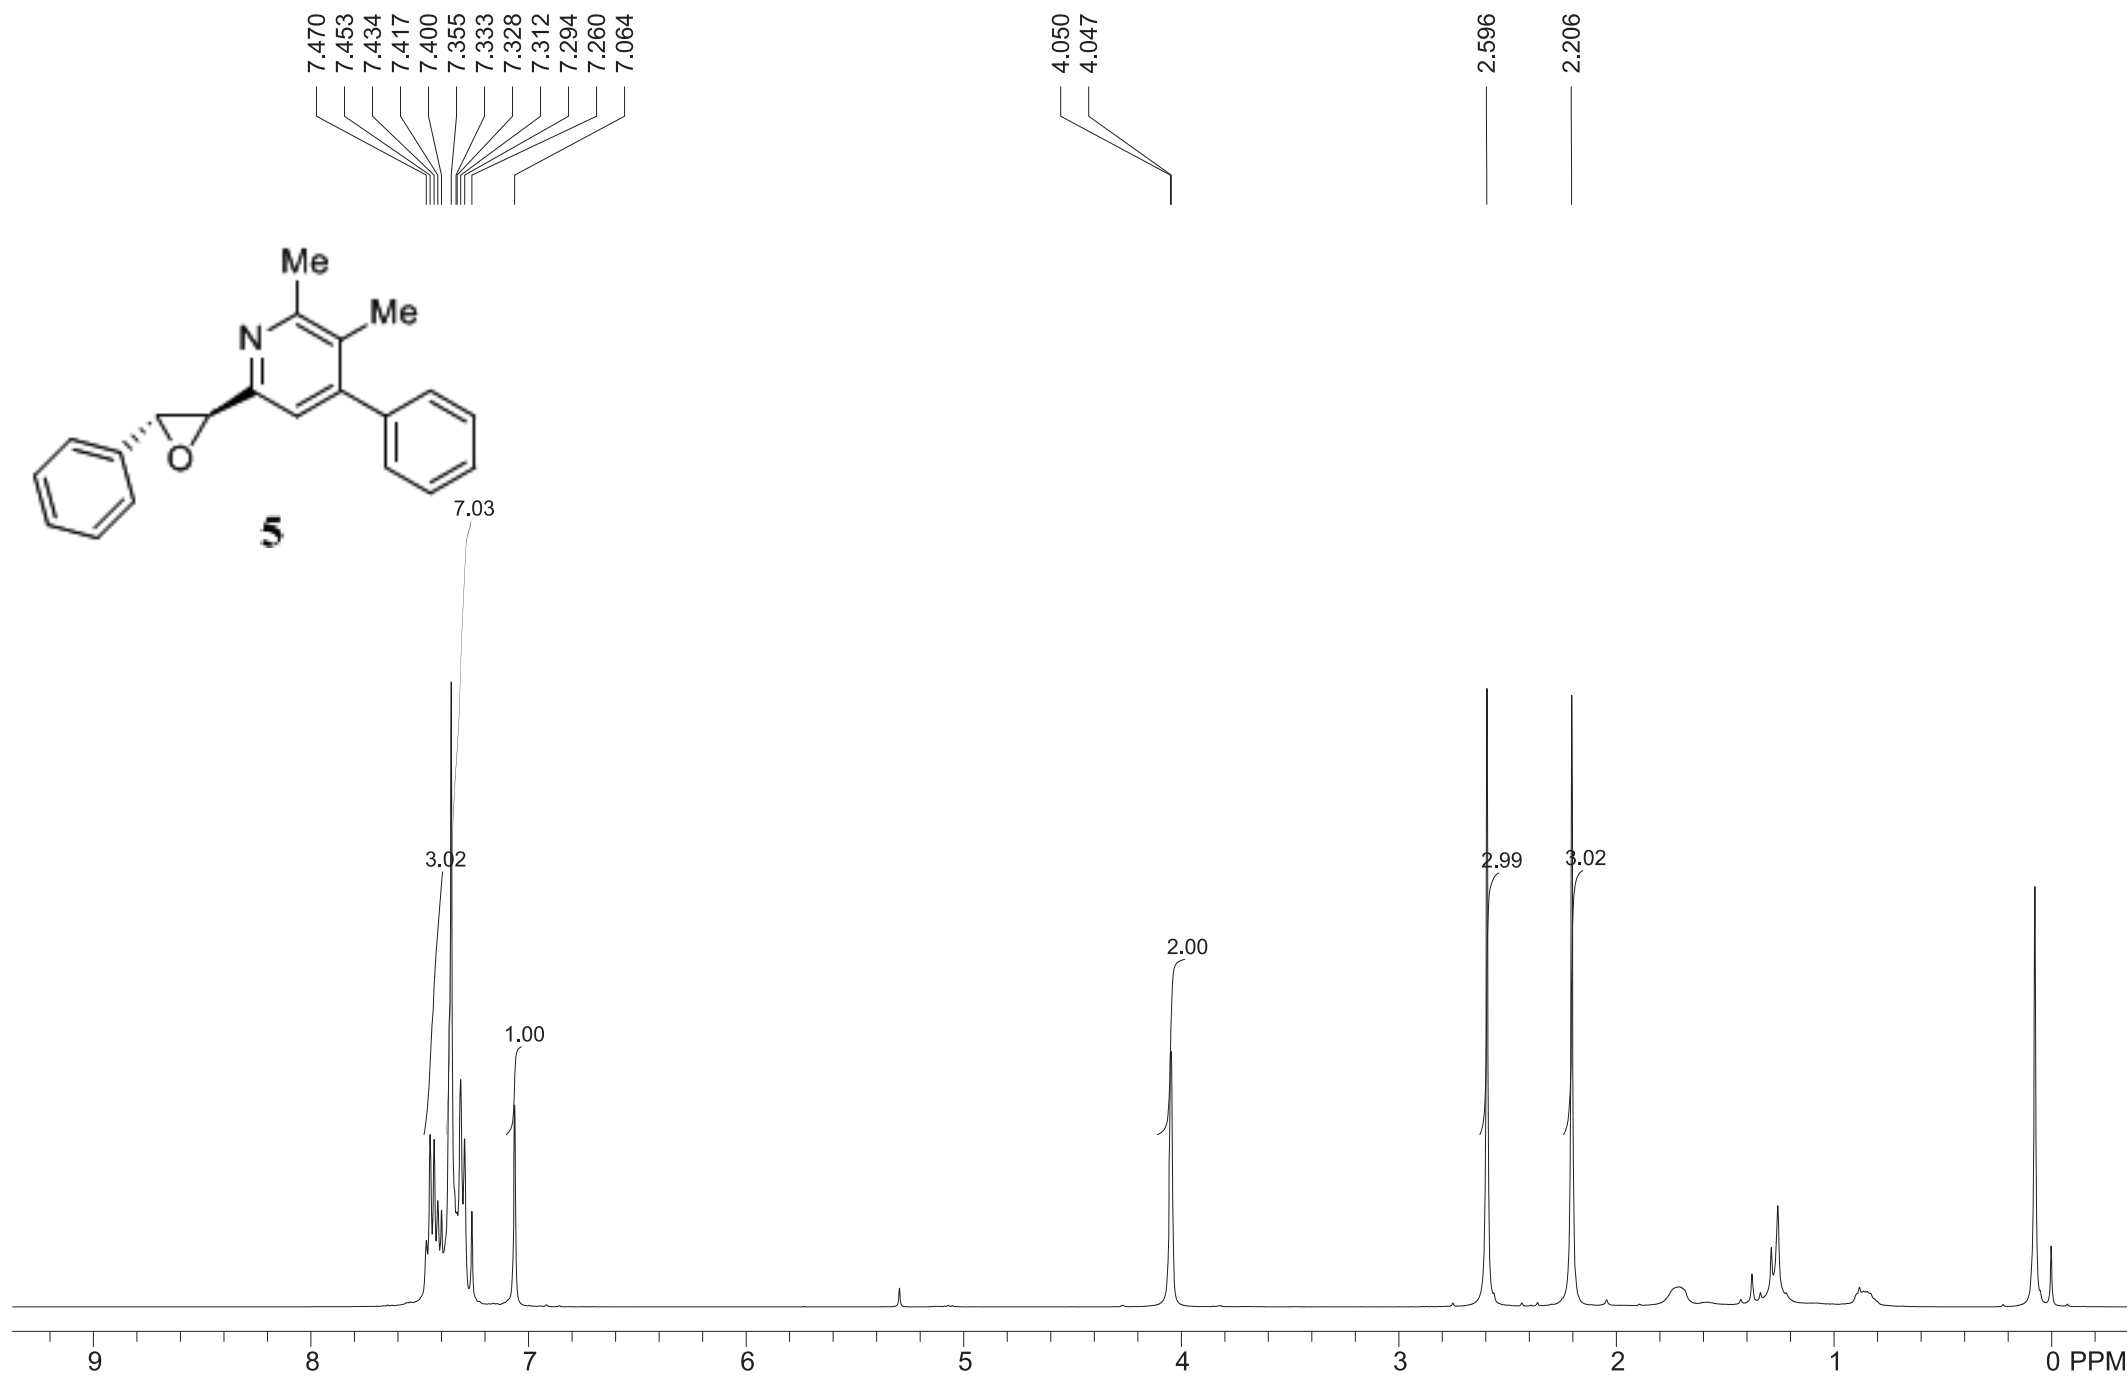

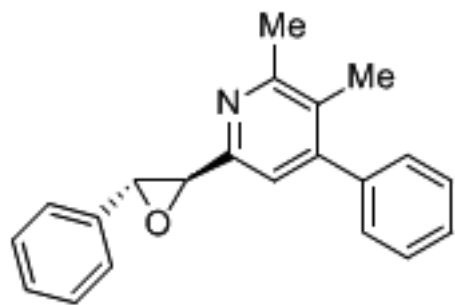

**5**

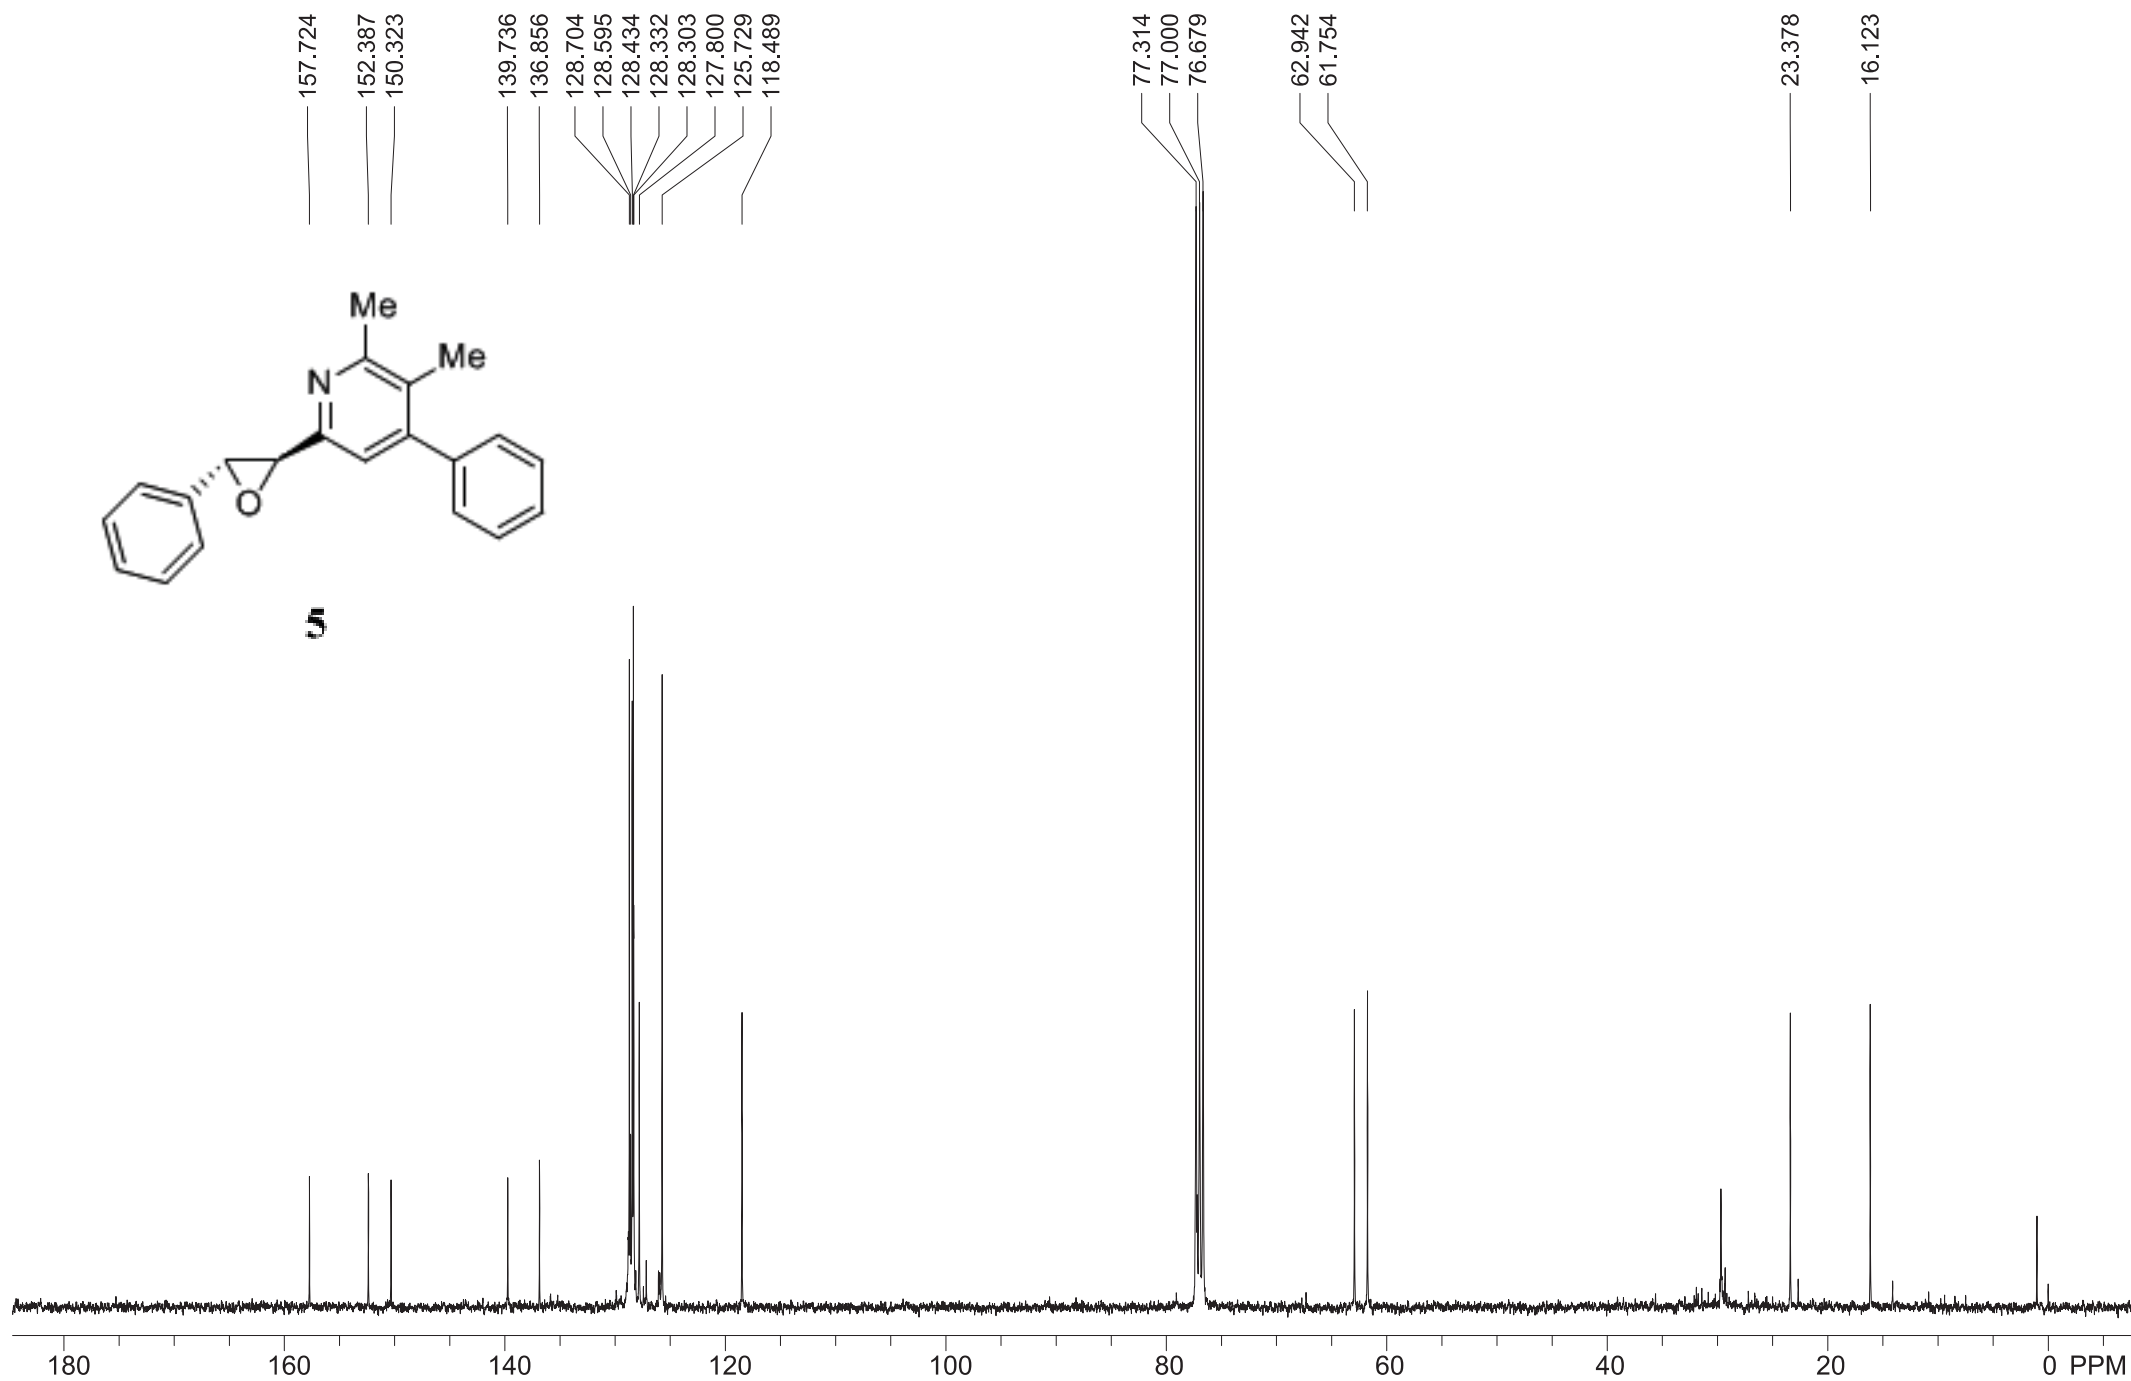

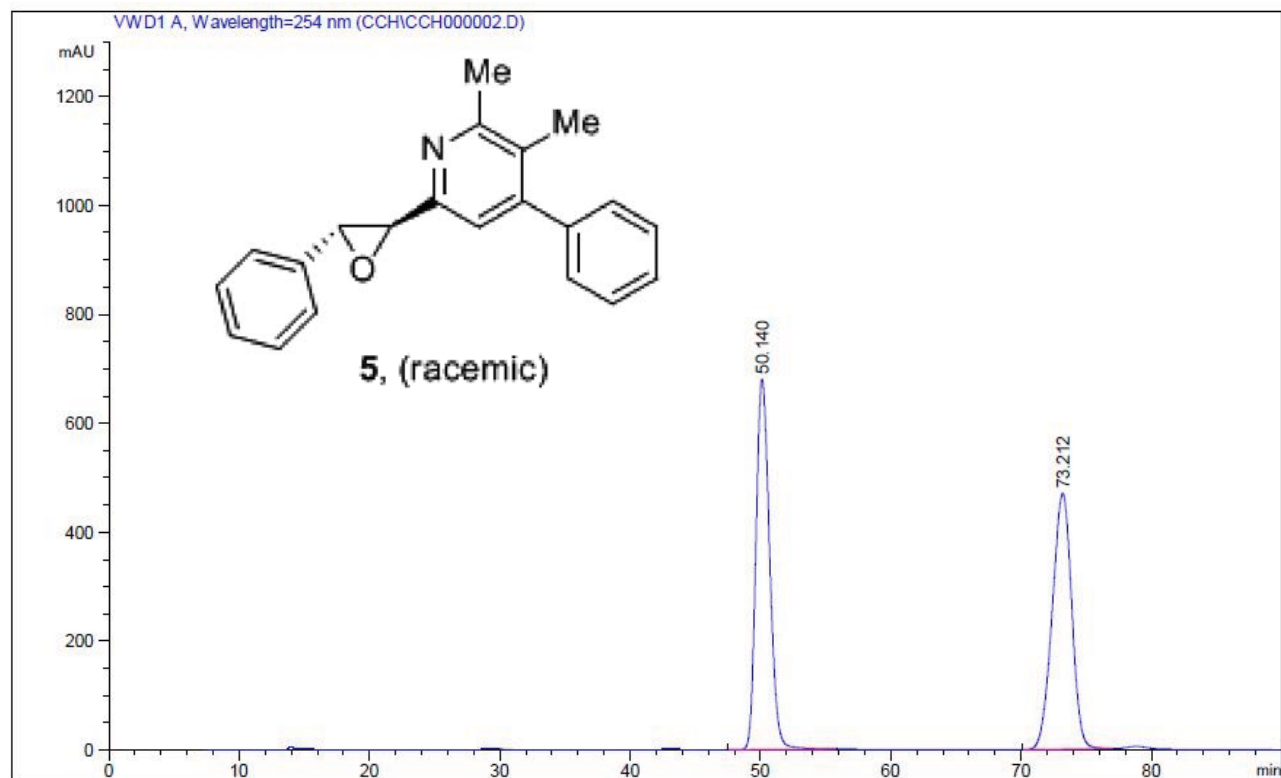

| Peak | ReTime [min] | Type | Width [min] | Area [MAU*s] | Height [MAU] | Area %  |
|------|--------------|------|-------------|--------------|--------------|---------|
| 1    | 50.140       | BB   | 1.1286      | 4.92342e4    | 681.17688    | 50.1966 |
| 2    | 73.212       | BB   | 1.6100      | 4.88486e4    | 470.02066    | 49.8034 |

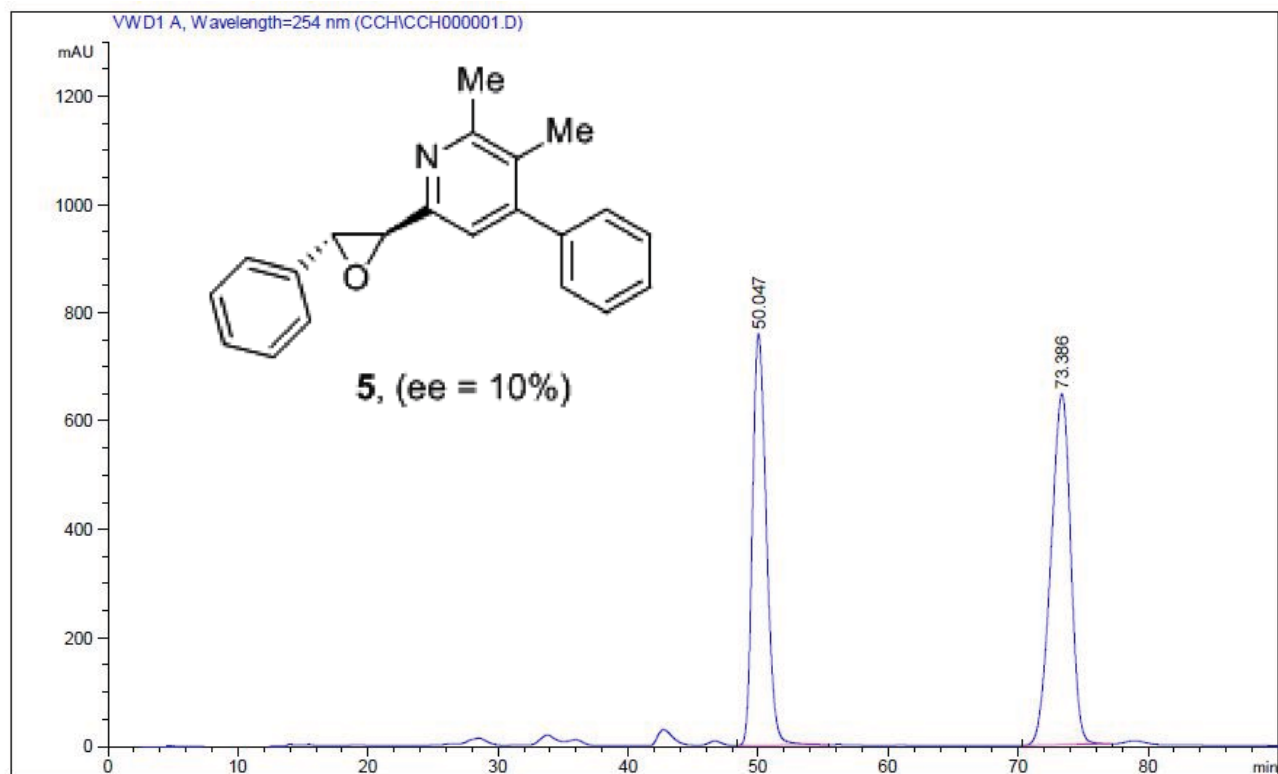

| Peak | ReTime [min] | Type | Width [min] | Area [MAU*s] | Height [MAU] | Area %  |
|------|--------------|------|-------------|--------------|--------------|---------|
| 1    | 50.047       | BB   | 1.1539      | 5.60500e4    | 759.30621    | 45.0492 |
| 2    | 73.386       | BB   | 1.6182      | 6.83695e4    | 647.99658    | 54.9508 |

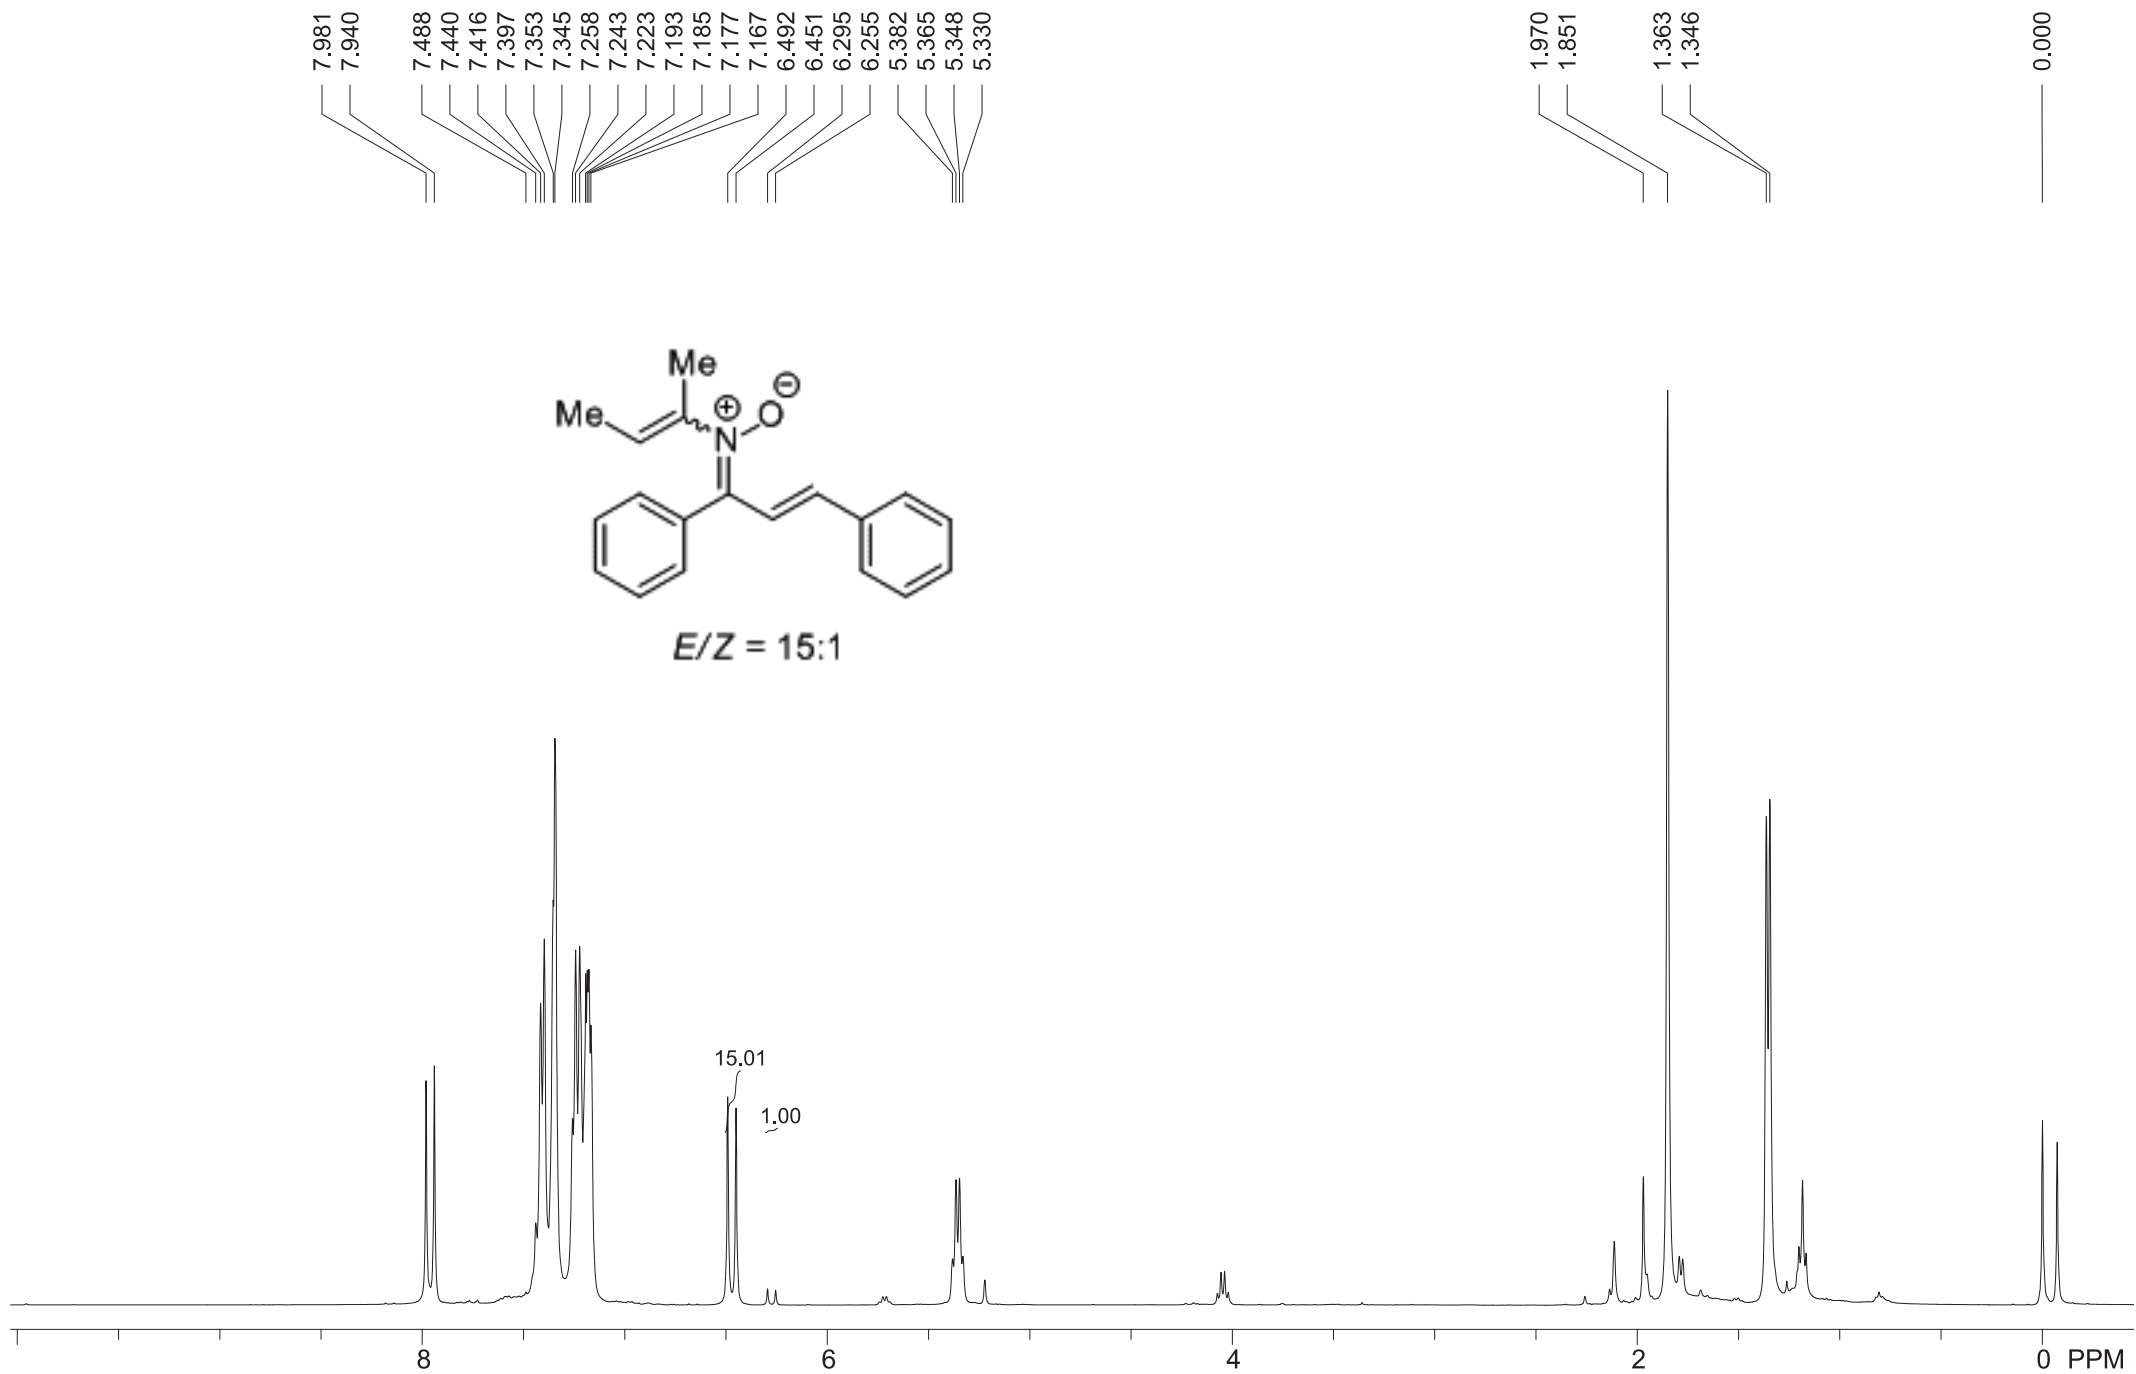



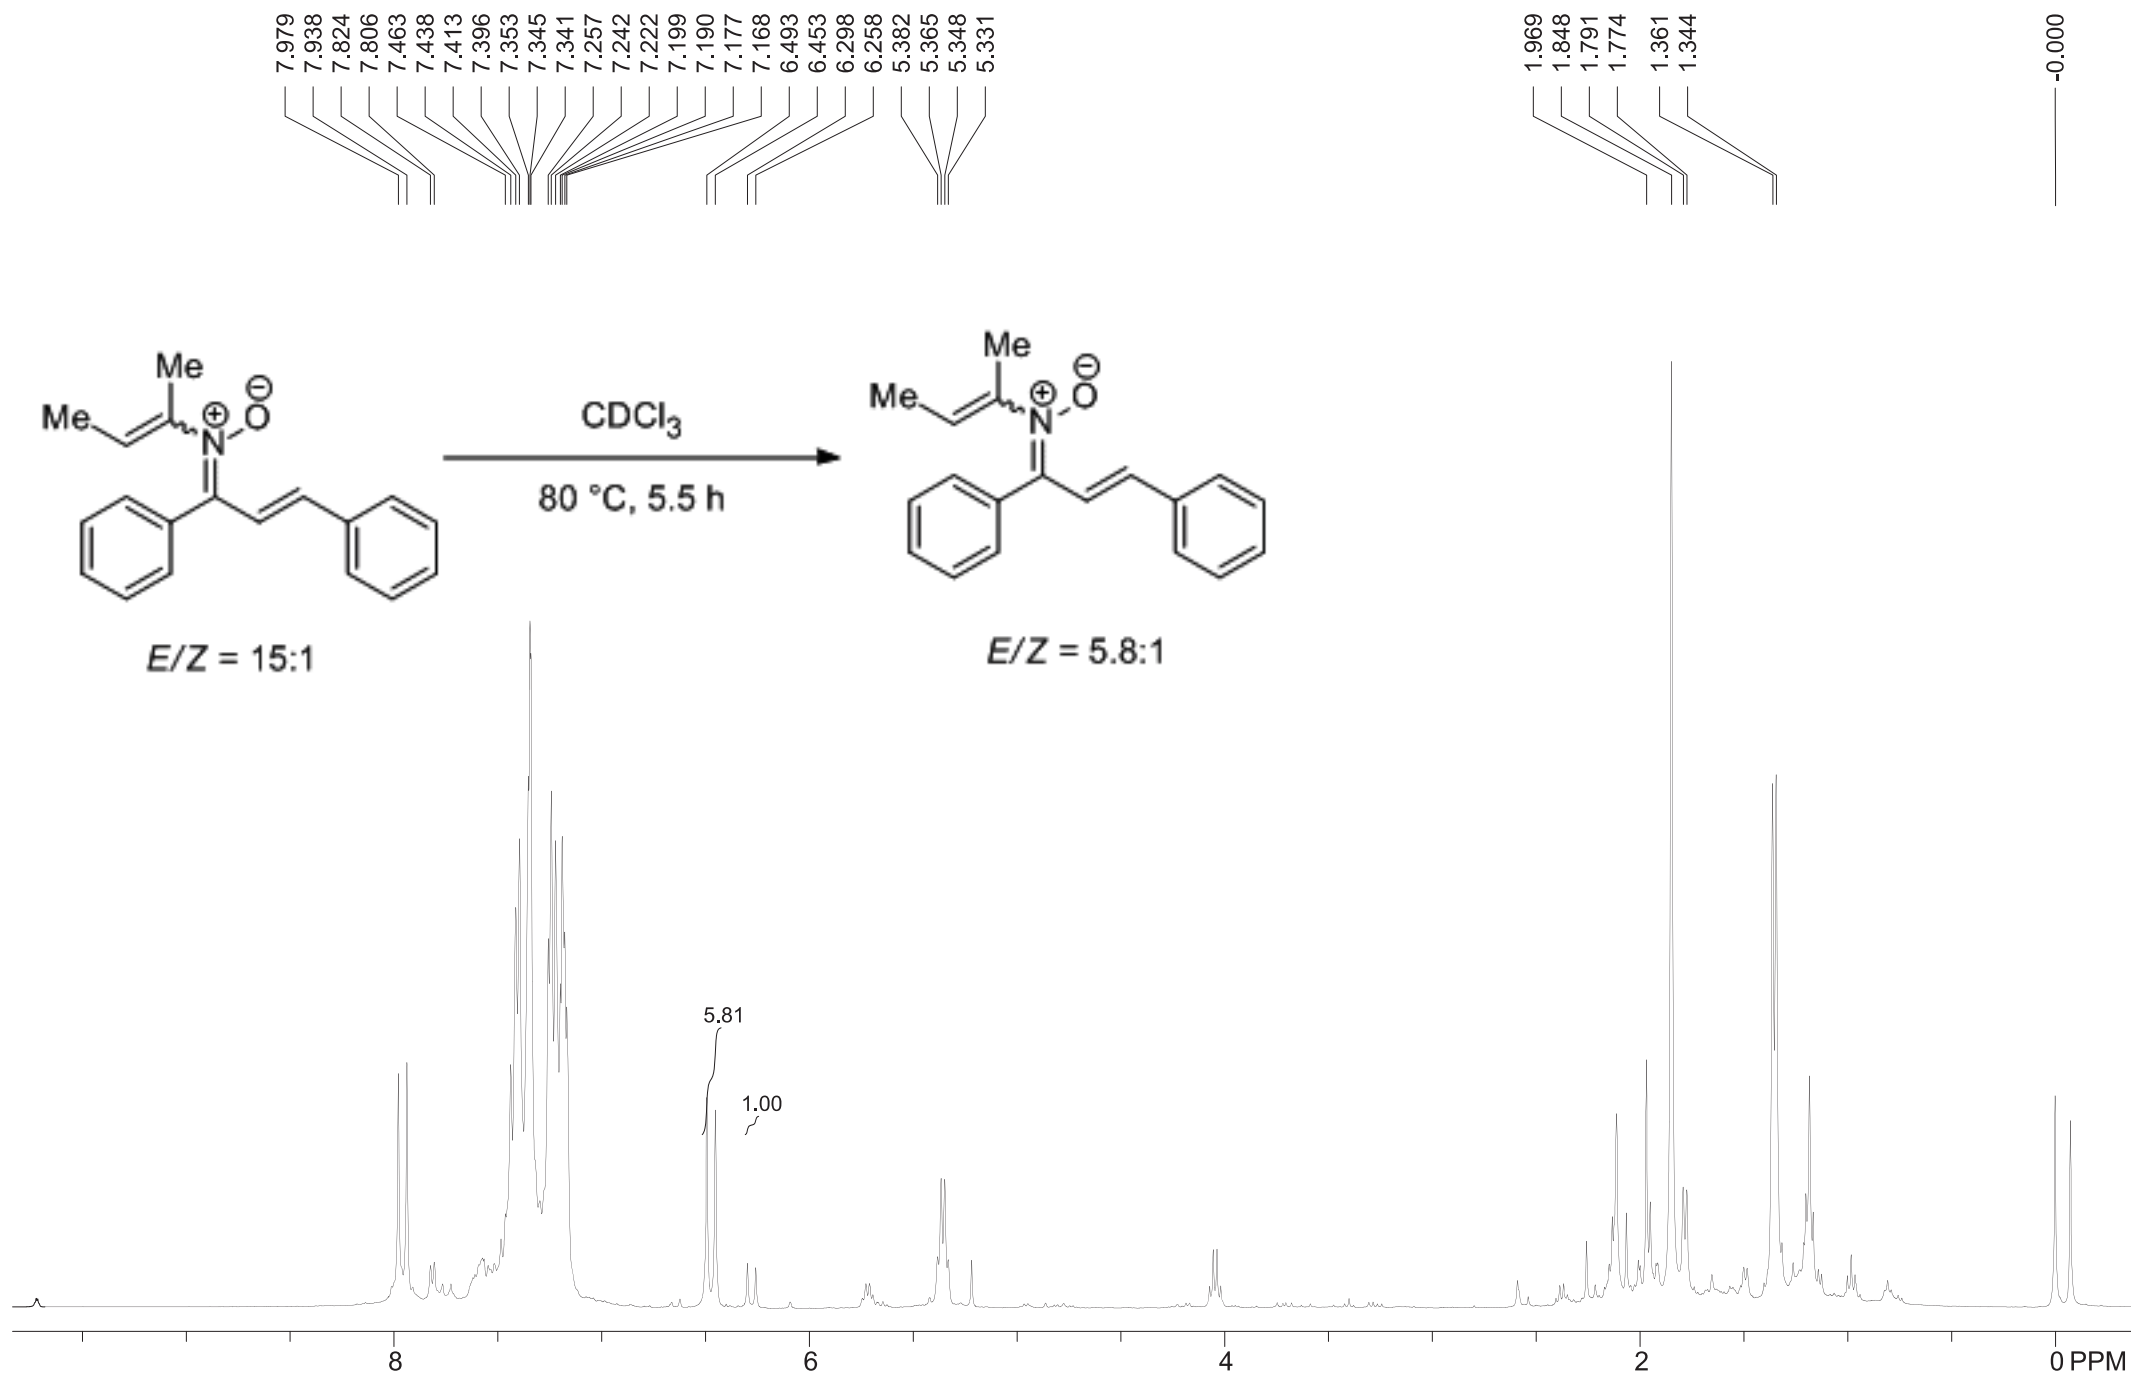

7.977  
7.936  
7.443  
7.427  
7.402  
7.386  
7.376  
7.360  
7.351  
7.346  
7.262  
7.251  
7.230  
7.206  
7.192  
7.178  
6.501  
6.460  
6.310  
6.270  
5.755  
5.738  
5.721  
5.704  
5.393  
5.377  
5.359  
5.343

1.974  
1.849  
1.797  
1.780  
1.366  
1.349

-0.000

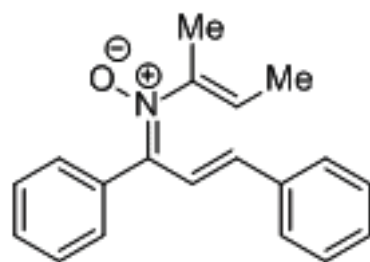

*E/Z* = 1:1.4

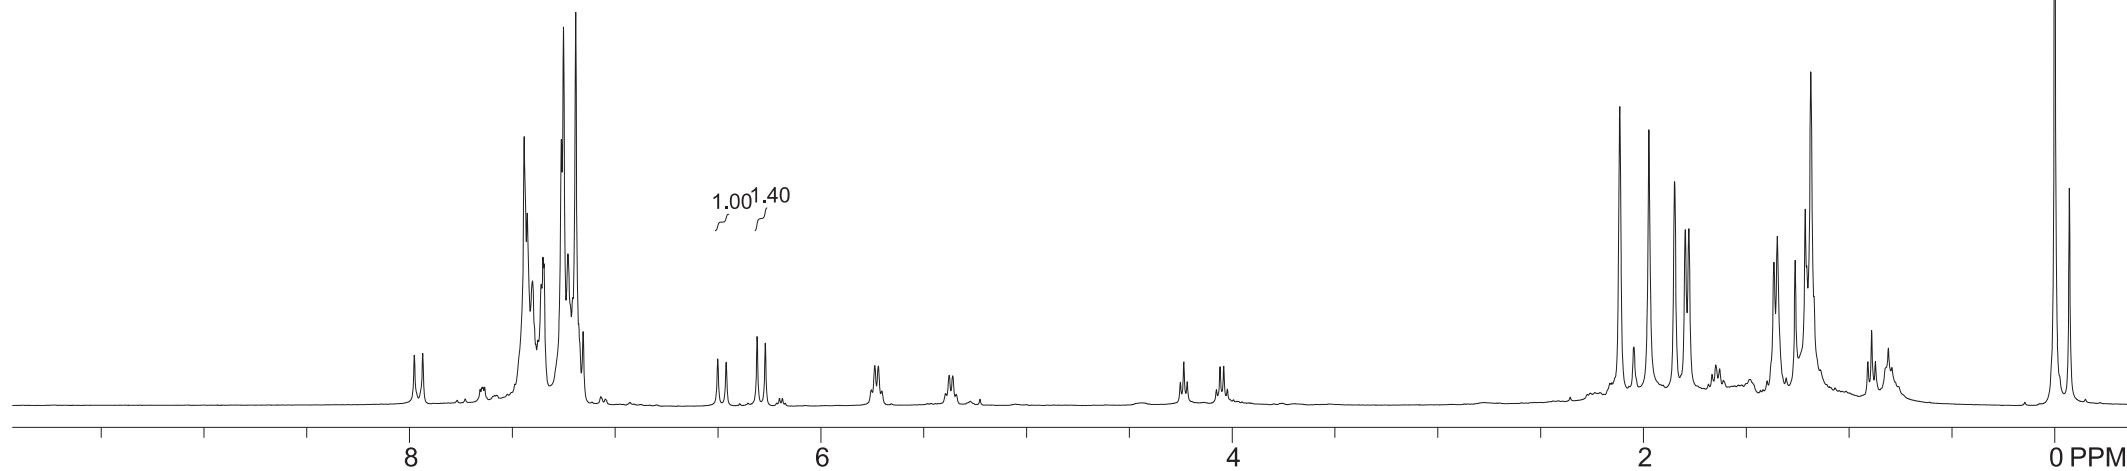

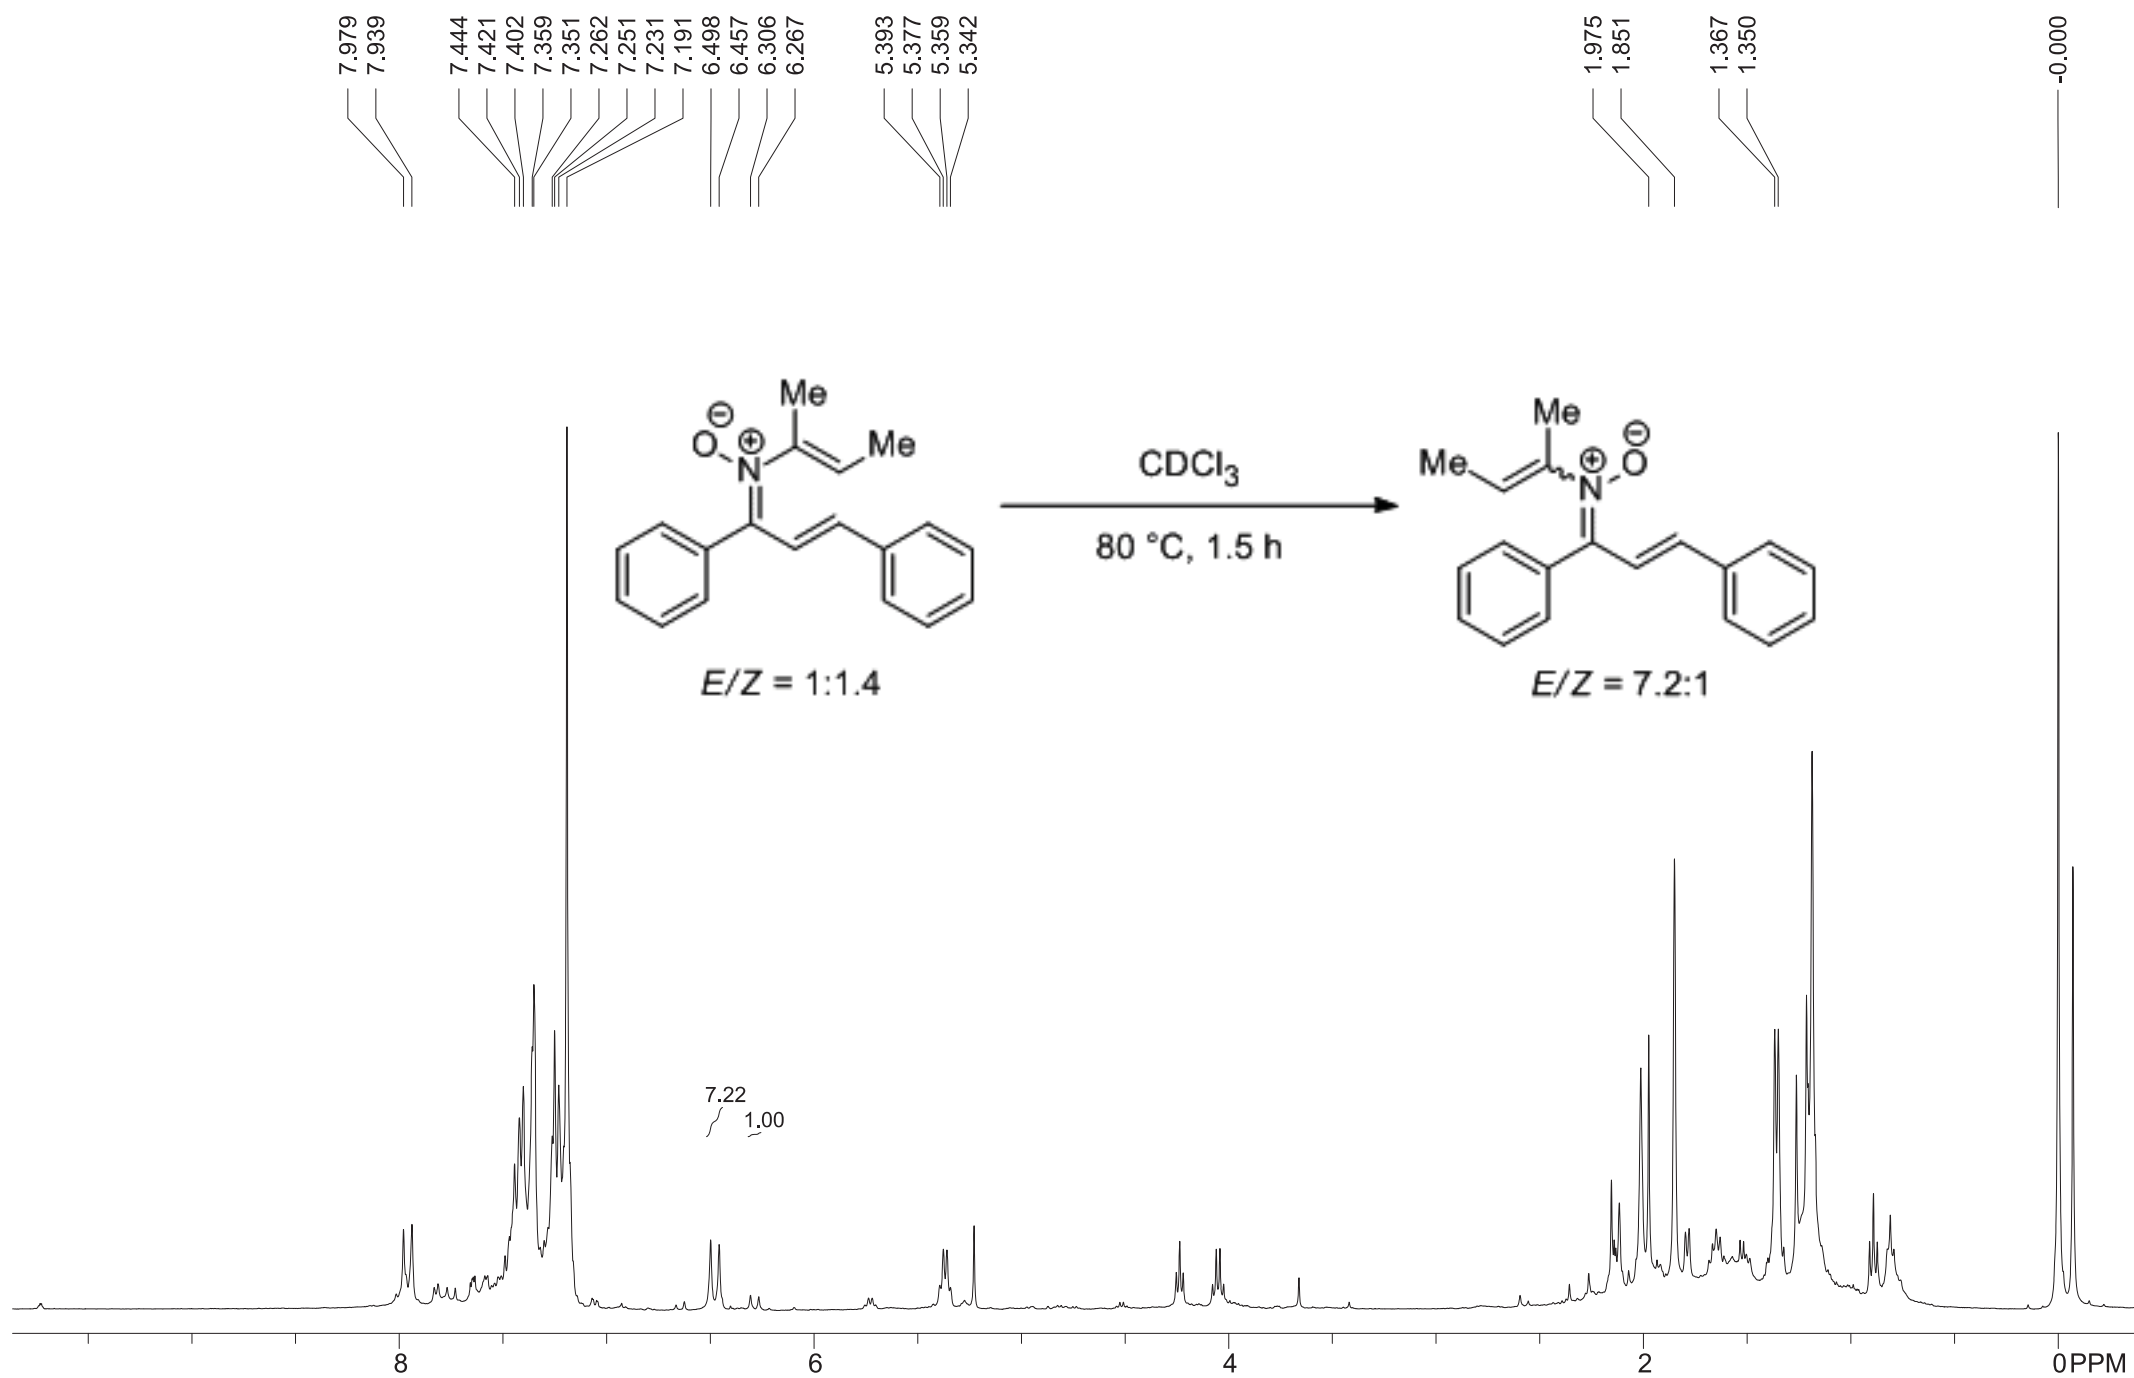

Supplement: c8gc00630j1.pdf [file c8gc00630j1.pdf]
